# Supplementary material for: Quantitative chemoproteomic profiling reveals multiple target interactions of spongiolactone derivatives in leukemia cells
Source: Royal Society of Chemistry journal article supplement (doi:10.1039/c7cc04990k), 2017-01-01
Supplement: c7cc04990k2.xlsx [file c7cc04990k2.xlsx]

## Sheet: Key
Supplementary Table S1	Chemical proteomics with probe (+)-3 in K562 cells. Identification of proteins following labelling with 3, CuAAC, pull-down, tryptic digest and LC-MS/MS analysis.
Abbreviations	NaN = not a number (not quantified in proteomics); LFQ = label-free quantification using MaxQuant (log2 intensity)
Definitions	T-test enrichment X/Y = Log2(Mean LFQ sample X/Mean LFQ sample Y)
Experimental design	Experiments A, B, C, D are independent biological replicates: cells were labelled and harvested in separate experiments on different days. Sample lysis and downstream processing was performed together.
Contained in this spreadsheet:
T-test probe 3 in K562 cells	Filtering	Data were filtered to first retain only proteins with at least 2 razor+unique peptides in at all four replicates of either 3 or DMSO treated samples, and quantified in at least 3/4 biological replicates.
	Missing values imputation and t-test	Missing values were imputed from a normal distribution (width 0.3, downshift 1.8, across total dataset) and a two-sample t-test performed to compare DMSO and 3-treated samples: two sided, permutation-corrected (250 permutations), FDR 0.001, s0 0.5
Hits annotation	GO (gene ontology) annotation data was imported from Uniprot	SH_1: protein annotated as hydrolase in dataset of Camara et al. (beta-lactone probe, at DOI: 10.1016/j.bmcl.2014.11.038)
		SH_2: protein annotated as hydrolase in dataset of Cognetta et al. (carbamate probe, at DOI: 10.1016/j.chembiol.2015.05.018)

## Sheet: Ttest K562
LFQ intensities (Log2)								Global data				T-test probe3 vs DMSO					Protein information
DMSO_A	DMSO_B	DMSO_C	DMSO_D	probe3_A	probe3_B	probe3_C	probe3_D	Razor + unique peptides	Sequence coverage [%]	Intensity	MS/MS count	Significant	Significant & Log2(enrichment) >2	-Log10 (p-value)	Difference	Test statistic	Protein IDs	Majority protein IDs	Protein names	Gene names	Mol. weight [kDa]
21.6214	22.2199	22.967	21.4537	30.2738	30.4377	30.6415	30.7601	8	37.2	33.0506	38	+	+	6.41647	8.46277	9.85032	Q53GQ0;A0A1B0GV93;E9PI21;A0A1B0GVY6;A0A1B0GW85;A0A1B0GU83	Q53GQ0;A0A1B0GV93;E9PI21;A0A1B0GVY6	Very-long-chain 3-oxoacyl-CoA reductase	HSD17B12	34.324
21.5012	21.7281	21.5497	21.8398	28.2283	28.5169	28.2665	28.581	17	30.5	30.9346	68	+	+	8.7076	6.74347	10.906	H7BXI1;A0A087WXU3;A0FGR8	H7BXI1;A0A087WXU3;A0FGR8	Extended synaptotagmin-2	ESYT2	98.008
22.2265	21.8757	21.3554	21.5091	28.0882	27.7336	27.4075	27.8998	11	16.2	30.3317	35	+	+	6.55822	6.04055	8.13374	P50416;H3BMD2;H3BUJ0;H3BP22;H3BUV7	P50416	Carnitine O-palmitoyltransferase 1, liver isoform	CPT1A	88.367
21.7191	22.607	21.3279	22.2495	26.4087	25.5272	27.0706	25.4047	6	18.2	28.8122	11	+	+	3.84716	4.12689	4.1951	P37268;E9PNM1;E9PJG4;E9PS69	P37268;E9PNM1	Squalene synthase	FDFT1	48.115
22.233	22.7818	22.4017	22.7107	26.4201	26.8377	26.4405	26.2917	5	16.2	29.0716	16	+	+	6.31362	3.96573	5.87395	B5MDU6;Q9H6V9;A0A0A0MSH6;C9JUM0;B5MCU4;C9JHU6;B5MCE2;B4DRG3	B5MDU6;Q9H6V9;A0A0A0MSH6;C9JUM0;B5MCU4	UPF0554 protein C2orf43	LDAH;C2orf43	42.668
23.0125	21.7096	21.1841	22.0501	25.6222	25.6565	25.888	25.6475	3	16.5	28.3131	10	+	+	4.11805	3.71446	4.17451	B1APM4;P35610	B1APM4;P35610	Sterol O-acyltransferase 1	SOAT1	29.892
22.8927	22.9371	22.7465	22.6793	26.5567	26.3362	26.9899	25.9711	8	17.4	29.0553	19	+	+	5.49758	3.64958	5.05877	Q16880;D6RFW2	Q16880	2-hydroxyacylsphingosine 1-beta-galactosyltransferase	UGT8	61.437
22.353	21.5468	22.1766	22.3484	26.1454	25.7082	25.3756	25.5874	6	16.5	28.319	12	+	+	5.14559	3.59796	4.79327	O14975;G3V1R7	O14975;G3V1R7	Very long-chain acyl-CoA synthetase	SLC27A2	70.311
21.9629	22.8457	22.1097	21.9997	25.483	25.557	26.7867	25.3135	5	11.6	28.4504	10	+	+	3.96866	3.55555	3.96594	Q8IV08;M0R1F7;M0R3G9	Q8IV08	Phospholipase D3	PLD3	54.705
22.6585	21.4464	22.4884	22.0007	25.5214	25.7868	25.6219	25.8737	6	14	28.2234	19	+	+	4.79912	3.55246	4.53266	Q9UBV2;G3V3B3	Q9UBV2	Protein sel-1 homolog 1	SEL1L	88.754
21.7786	21.7902	22.5392	21.9324	25.4818	25.267	25.5436	25.9196	9	14.9	28.0894	22	+	+	5.37726	3.54292	4.88454	O15228;Q5TBH8;Q5TBH6	O15228;Q5TBH8	Dihydroxyacetone phosphate acyltransferase	GNPAT	77.187
22.4025	21.9822	21.9001	21.285	24.3253	25.557	26.1613	25.2664	4	15.2	28.0163	13	+	+	3.59714	3.43508	3.62891	E7EVQ6;Q14534;H0YBN7;E5RJH9	E7EVQ6;Q14534;H0YBN7	Squalene monooxygenase	SQLE	53.067
21.7538	22.2493	22.3111	21.7904	24.9082	25.2513	25.619	25.922	4	11	27.9707	10	+	+	4.86012	3.39897	4.44307	Q2TAA5	Q2TAA5	GDP-Man:Man(3)GlcNAc(2)-PP-Dol alpha-1,2-mannosyltransferase	ALG11	55.65
22.0485	21.9578	22.0375	22.6162	25.1129	25.6558	25.3629	25.7078	5	14.9	28.047	17	+	+	5.42922	3.29487	4.67135	Q86UL3;E5RIA1;E5RHA6	Q86UL3	Glycerol-3-phosphate acyltransferase 4	AGPAT6	52.07
23.2222	22.8951	21.8871	22.2383	25.575	26.1489	25.3423	25.7761	4	18.4	28.2893	9	+	+	3.98811	3.1499	3.7123	E9PG39;E9PC15;Q53H12;A0A0G2JLD0;A0A0G2JLG5	E9PG39;E9PC15;Q53H12	Acylglycerol kinase, mitochondrial	AGK	26.925
21.7038	23.1086	21.7391	22.2675	24.9051	25.489	25.6563	25.2969	6	17.5	27.8813	12	+	+	3.85891	3.1321	3.6194	Q7L5N7;H3BU68	Q7L5N7;H3BU68	Lysophosphatidylcholine acyltransferase 2	LPCAT2	60.207
22.2326	21.665	21.6256	22.1607	24.714	24.9239	24.8119	25.0633	5	5.6	27.4441	10	+	+	5.53554	2.95729	4.3696	O15118;K7EQ23	O15118;K7EQ23	Niemann-Pick C1 protein	NPC1	142.17
23.0334	22.6248	22.7583	22.5769	25.2746	25.5808	25.9624	25.7658	4	16.8	28.2479	17	+	+	5.45779	2.89751	4.27006	Q9NUQ2;H0YC22	Q9NUQ2	1-acyl-sn-glycerol-3-phosphate acyltransferase epsilon	AGPAT5	42.072
21.053	22.2913	25.3937	21.9233	25.4507	25.5026	25.983	25.315	5	12.8	28.3649	10	+	+	1.63526	2.89749	1.98877	A0A0C4DFL7;Q16850;H7C0D0	A0A0C4DFL7;Q16850	Lanosterol 14-alpha demethylase	CYP51A1	57.278
21.4328	22.572	22.5609	21.8572	25.0386	24.4978	24.8666	24.7442	3	8.6	27.4413	10	+	+	3.94429	2.68107	3.34301	Q9BT22;K7EID2;A0A087WZJ8;Q6GMV1	Q9BT22;K7EID2	Chitobiosyldiphosphodolichol beta-mannosyltransferase	ALG1	52.518
22.9882	22.2633	23.3357	23.0967	25.6949	25.5863	25.5047	25.5789	8	18.1	28.1425	24	+	+	4.56367	2.67026	3.63683	A0A0G2JJD3;O95870;A0A0G2JI89	A0A0G2JJD3;O95870;A0A0G2JI89	Abhydrolase domain-containing protein 16A	ABHD16A	67.518
22.3758	22.3701	22.0034	21.9456	24.6735	24.7211	24.77	24.7581	4	21.7	27.2645	8	+	+	6.20746	2.55696	4.13969	H0YCW6;A0A087WZ62;Q9H6U8	H0YCW6;A0A087WZ62;Q9H6U8	Alpha-1,2-mannosyltransferase ALG9	ALG9	24.198
21.4492	21.9046	21.6966	21.4428	24.447	22.3931	24.6255	24.5623	3	8.6	27.0738	7	+	+	2.30728	2.38364	2.26907	A0A0R4J2G3;A0A0A0MTJ9;Q6PIU2;H7C046	A0A0R4J2G3;A0A0A0MTJ9;Q6PIU2;H7C046	Neutral cholesterol ester hydrolase 1	NCEH1	49.062
23.9848	24.4371	23.5562	24.3361	25.7645	26.0791	26.6333	26.8536	10	20.5	29.1973	35	+	+	3.39114	2.25406	2.75032	P28288	P28288	ATP-binding cassette sub-family D member 3	ABCD3	75.475
23.4731	22.3651	22.6225	23.417	25.1968	24.9393	25.2164	25.4795	3	12.6	27.9474	17	+	+	3.51839	2.23857	2.79547	Q15738;C9JDR0	Q15738;C9JDR0	Sterol-4-alpha-carboxylate 3-dehydrogenase, decarboxylating	NSDHL	41.9
21.8619	23.6691	21.9263	21.9487	24.7821	24.4839	24.2665	24.7604	3	24.3	27.0858	6	+	+	2.55276	2.22173	2.32299	P84077;P61204;F5H423;H0YGG7	P84077;P61204;F5H423	ADP-ribosylation factor 1;ADP-ribosylation factor 3	ARF1;ARF3	20.697
27.9442	28.6952	28.7748	28.6734	30.5951	30.5696	30.9617	30.2372	12	64.6	33.4698	90	+	+	3.83352	2.069	2.78134	P21964;E7EMS6;E7EUU8;F8WBW9;H7BZ45	P21964;E7EMS6;E7EUU8	Catechol O-methyltransferase	COMT	30.037
22.5792	22.1286	22.579	23.1324	28.9043	28.8857	29.0466	29.3438	8	35.1	31.5628	27	+	+	6.85011	6.44029	8.80905	P30519;A0A087WT44;I3L159;I3L1F5;I3L4P8;A0A1B0GXH0;I3L463;I3L1Y2;I3L276	P30519;A0A087WT44;I3L159;I3L1F5	Heme oxygenase 2	HMOX2	36.032
20.096	22.8461	22.4233	22.2069	28.0029	28.0504	28.1028	28.4363	10	28.5	30.7245	38	+	+	4.25367	6.255	5.5781	O43615;M0QXU7;M0R301;M0QXM9;M0R124	O43615;M0QXU7	Mitochondrial import inner membrane translocase subunit TIM44	TIMM44	51.355
22.9688	21.9964	23.1028	22.6021	28.6006	28.2195	28.3368	28.5265	3	13.2	30.977	12	+	+	6.23099	5.75332	7.54675	B4E1G1;Q9BUN8;E5RGY0	B4E1G1;Q9BUN8	Derlin-1	DERL1	17.033
22.1358	21.1075	22.8755	22.1455	27.6617	27.6209	27.9392	27.8746	19	17.4	30.3353	70	+	+	5.3165	5.70807	6.54752	Q08378;A0A087WV43	Q08378	Golgin subfamily A member 3	GOLGA3	167.35
22.125	22.2029	21.9907	21.6844	26.6341	26.9855	26.8461	27.0758	9	15.8	29.6971	33	+	+	7.26588	4.88466	7.52307	Q9UGP8	Q9UGP8	Translocation protein SEC63 homolog	SEC63	87.996
21.7789	20.8191	22.2588	21.2622	26.4214	26.1943	26.2698	26.5583	5	17.7	28.8866	13	+	+	5.25327	4.83121	5.8732	Q9BQT8	Q9BQT8	Mitochondrial 2-oxodicarboxylate carrier	SLC25A21	33.303
22.0224	21.8842	22.2133	21.9737	25.672	26.3933	26.6808	26.512	4	16.2	28.891	11	+	+	5.78468	4.29114	5.85616	Q9H2D1;E5RGK5;E5RFL3;E5RGT9	Q9H2D1	Mitochondrial folate transporter/carrier	SLC25A32	35.407
26.2391	26.6036	26.4278	27.0587	30.6096	30.6511	31.0319	31.0089	10	42.2	33.5439	75	+	+	6.03697	4.24311	5.98777	Q9Y6C9	Q9Y6C9	Mitochondrial carrier homolog 2	MTCH2	33.331
21.9011	21.8754	21.4391	22.652	25.8198	25.8417	26.208	26.6699	3	28.9	28.6953	13	+	+	4.89014	4.16797	5.07595	P09105	P09105	Hemoglobin subunit theta-1	HBQ1	15.508
22.8693	21.8478	21.1062	23.2055	26.0969	25.9601	25.8131	26.5875	5	18.3	28.6563	17	+	+	3.56292	3.85722	3.82399	Q7KZN9	Q7KZN9	Cytochrome c oxidase assembly protein COX15 homolog	COX15	46.03
21.5513	22.4776	22.2051	21.916	25.5323	25.4984	25.8497	25.4427	4	11.5	28.2428	17	+	+	5.4549	3.54325	4.93074	Q12907;D6RBV2;D6RIU4;D6RDX1	Q12907;D6RBV2;D6RIU4;D6RDX1	Vesicular integral-membrane protein VIP36	LMAN2	40.228
22.0044	24.6587	24.4912	24.5972	27.3593	27.3714	27.9067	26.7712	9	16.3	30.0686	28	+	+	2.60101	3.41424	2.8792	A0A087WW65;O75027;B4DGL8	A0A087WW65;O75027;B4DGL8	ATP-binding cassette sub-family B member 7, mitochondrial	ABCB7	78.287
22.7749	22.2024	21.6256	22.7112	25.3475	26.6384	25.7818	25.1697	3	21.9	28.7224	15	+	+	3.70893	3.40582	3.69129	E9PLD0;Q9H0U4;E7END7;Q92928;P62820;H0YLJ8;H0YL94;H0YMN7;H0YNE9;P61026;P51153;Q92930;P61006;P59190	E9PLD0;Q9H0U4;E7END7;Q92928;P62820	Ras-related protein Rab-1B;Putative Ras-related protein Rab-1C;Ras-related protein Rab-1A	RAB1B;RAB1A;RAB1C	18.483
21.3893	21.3663	23.2342	20.6244	25.259	25.2463	24.9356	24.6064	4	17.8	27.5993	10	+	+	2.9463	3.35828	3.11793	Q99536;K7ERT7;K7ESA3;K7ENX2;K7EM19	Q99536;K7ERT7	Synaptic vesicle membrane protein VAT-1 homolog	VAT1	41.92
21.7845	23.8497	24.4837	24.0201	26.1339	27.0996	26.4943	27.6694	8	15.1	29.6208	35	+	+	2.53236	3.31481	2.79145	E9PHI4;O94901;H0Y742;H0Y6N5;H7C2K3;H7C3X3;C9JK55	E9PHI4;O94901;H0Y742;H0Y6N5;H7C2K3	SUN domain-containing protein 1	SUN1	91.112
22.712	21.8172	22.1553	22.986	25.7245	25.873	25.8025	25.491	3	13.9	28.5334	14	+	+	4.67667	3.3051	4.25286	H3BN98;I3L3P7;I3L246;P62244;H3BV27;H3BT37;I3L303;H3BPJ2;Q15041	H3BN98;I3L3P7;I3L246;P62244	40S ribosomal protein S15a	RPS15A	27.168
28.3111	28.3775	28.3127	28.1754	31.1984	31.5733	31.5329	31.7868	31	38.4	34.2336	165	+	+	6.57465	3.22865	5.13401	P16615;H7C5W9;O14983;Q93084;H3BVB2;A0A0C4DH86;J3QSY6;H3BTW4	P16615;H7C5W9	Sarcoplasmic/endoplasmic reticulum calcium ATPase 2	ATP2A2	114.76
22.8366	21.7093	23.1778	21.7561	25.0486	26.1201	25.1924	25.7723	4	13.7	28.1778	12	+	+	3.38017	3.16342	3.3279	H0Y8C3;Q9NZJ7	H0Y8C3;Q9NZJ7	Mitochondrial carrier homolog 1	MTCH1	43.121
22.1341	23.163	21.9825	24.8363	25.6989	26.4456	26.2867	26.1784	5	21.7	28.8707	14	+	+	2.4407	3.12343	2.65499	F5GY37;J3KPX7;Q99623;F5H3X6;F5GWA7;F5H0C5	F5GY37;J3KPX7;Q99623;F5H3X6;F5GWA7	Prohibitin-2	PHB2	29.723
25.3936	25.0683	25.0753	25.7441	28.0146	28.3048	28.4065	28.9583	15	30.7	31.1956	58	+	+	4.73242	3.10072	4.11067	Q9BTX1	Q9BTX1	Nucleoporin NDC1	NDC1	76.304
22.6768	22.0698	21.621	21.4244	24.9211	24.8036	25.2071	25.1913	4	15.9	27.6158	7	+	+	4.34257	3.08273	3.87543	I3L1P8;Q02978	I3L1P8;Q02978	Mitochondrial 2-oxoglutarate/malate carrier protein	SLC25A11	32.182
21.6419	22.823	22.4935	21.927	25.7585	25.3598	25.1376	24.954	7	23.2	27.8901	22	+	+	4.15413	3.08109	3.76369	O94919	O94919	Endonuclease domain-containing 1 protein	ENDOD1	55.016
21.9438	22.6841	23.4527	22.7584	25.5714	25.9677	25.6906	25.7294	7	11.1	28.3628	20	+	+	4.10671	3.03002	3.69768	A0A075B7F8;A8CG34;A0A087WY75;C9JFL1	A0A075B7F8;A8CG34;A0A087WY75	Nuclear envelope pore membrane protein POM 121C	POM121C	125.09
20.8994	22.023	22.2166	23.0582	24.8668	24.9592	24.3859	25.7788	3	12.8	27.5983	8	+	+	2.84465	2.94835	2.86225	C9J3L8;C9J5W0;E9PAL7;C9IZQ1;P43307	C9J3L8;C9J5W0;E9PAL7;C9IZQ1;P43307	Translocon-associated protein subunit alpha	SSR1	29.573
23.034	21.2105	22.7635	22.5021	25.2313	25.1186	24.9506	25.8877	7	12.4	28.3543	10	+	+	3.18007	2.91952	3.06351	Q9P2I0;H0YJF4	Q9P2I0	Cleavage and polyadenylation specificity factor subunit 2	CPSF2	88.486
22.2234	23.1032	22.9867	21.9034	25.415	25.336	25.2778	25.7725	6	2.4	28.0178	11	+	+	4.0523	2.89619	3.56605	Q14789;C9JGI8;C9J4Q3;B8ZZG1;REV__Q8N884;E7EU81;Q9NZW5	Q14789	Golgin subfamily B member 1	GOLGB1	376.01
22.2179	21.5294	22.5699	22.1606	24.8624	24.6836	25.2174	25.2094	6	23.2	27.5722	17	+	+	4.54758	2.87377	3.81287	Q96K37;H7C1I0;C9JK45	Q96K37;H7C1I0	Solute carrier family 35 member E1	SLC35E1	44.772
22.4461	21.5718	21.9717	22.7022	24.8005	25.0858	24.7481	25.4765	4	15.8	27.7063	13	+	+	4.10189	2.85479	3.56157	Q9H9B4;D6RDG7;S4R2X2;D6RFI0;D6RAE9	Q9H9B4;D6RDG7;S4R2X2;D6RFI0;D6RAE9	Sideroflexin-1	SFXN1	35.619
22.7816	21.3005	21.9566	21.9041	25.269	24.5744	24.7248	24.7317	3	57.4	27.3839	7	+	+	3.79365	2.83926	3.37917	C9JJT5;G3V325;C9JU26;P56134	C9JJT5;G3V325;C9JU26;P56134	ATP synthase subunit f, mitochondrial	ATP5J2-PTCD1;ATP5J2	5.9149
22.2817	22.2665	23.2893	21.8564	24.3547	25.7251	24.8184	25.5918	4	14.4	27.8736	9	+	+	3.0379	2.69904	2.85468	Q9HC21;J3KSB1;J3KSI7;J3QL84;J3KS44;J3QLV3;J3KRY6	Q9HC21	Mitochondrial thiamine pyrophosphate carrier	SLC25A19	35.511
25.3166	24.0931	25.0541	25.5647	27.6992	27.6755	27.6921	27.6812	12	32.1	30.4049	41	+	+	3.78669	2.67987	3.25999	O75874;C9J4N6;C9JJE5;C9JLU6	O75874;C9J4N6	Isocitrate dehydrogenase [NADP] cytoplasmic	IDH1	46.659
23.1649	22.5273	21.864	22.4435	24.9512	25.5125	25.1358	25.1118	4	11	27.8222	13	+	+	4.02755	2.6779	3.3831	A0A0C4DFM1;Q92544	A0A0C4DFM1;Q92544	Transmembrane 9 superfamily member 4	TM9SF4	72.54
23.0067	21.9417	21.4116	21.0769	24.3895	24.2286	24.8291	24.6918	3	16.2	27.0374	7	+	+	3.02737	2.67554	2.83533	Q9BVK6	Q9BVK6	Transmembrane emp24 domain-containing protein 9	TMED9	27.277
22.1837	23.2772	22.1828	22.0016	24.6388	24.9262	25.3047	24.9816	4	12.3	27.5075	8	+	+	3.66754	2.55147	3.10351	Q658P3;B8ZZX6	Q658P3;B8ZZX6	Metalloreductase STEAP3	STEAP3	54.6
22.0617	21.7708	22.11	21.9843	24.4681	23.9936	24.4518	24.2001	3	5.4	26.8212	8	+	+	5.56747	2.29671	3.61348	Q9NRK6	Q9NRK6	ATP-binding cassette sub-family B member 10, mitochondrial	ABCB10	79.147
22.0767	21.5167	22.8073	22.5226	24.1364	24.1829	24.5862	24.8088	6	10.7	26.9444	15	+	+	3.29317	2.19776	2.66445	Q92543;E9PLV3	Q92543	Sorting nexin-19	SNX19	108.6
22.1421	22.1038	22.5675	21.5547	23.7984	24.1448	24.9332	23.9084	6	19.4	26.7966	7	+	+	3.15741	2.10417	2.53607	Q9NXH8	Q9NXH8	Torsin-4A	TOR4A	46.914
21.9114	22.3927	22.4362	22.6206	24.2857	24.436	24.1726	24.8699	3	8.4	27.7398	9	+	+	4.18008	2.10085	2.9383	A0A0C4DGS1;P39656;U3KQ84	A0A0C4DGS1;P39656;U3KQ84	Dolichyl-diphosphooligosaccharide--protein glycosyltransferase 48 kDa subunit	DDOST	48.799
23.3627	22.0113	22.6793	22.5944	24.2162	24.8427	24.7075	25.1641	6	8.3	27.4161	15	+	+	3.05171	2.07071	2.46597	A0A024RCR6;A0A0G2JK23;P46379;A0A0G2JL47;F6S6P2;X6REW1;A0A0G2JJM1;F6TC96;F6UR09;F6U1F2;F6XTU0;A0A0G2JJR8;A0A1B0GX79;F6WML8;F6VEM6;F6X9W3;F6U341;H0Y710	A0A024RCR6;A0A0G2JK23;P46379;A0A0G2JL47;F6S6P2;X6REW1;A0A0G2JJM1	Large proline-rich protein BAG6	BAT3;BAG6	118.7
22.859	21.9676	23.09	21.3127	24.5509	23.6733	24.6806	24.4817	3	6	27.3578	13	+	+	2.31307	2.03926	2.10313	P08240	P08240	Signal recognition particle receptor subunit alpha	SRPR	69.81
22.2682	22.5639	22.5767	21.5613	27.6688	26.6465	26.5812	27.117	5	10.4	29.5744	20	+	+	5.03413	4.76085	5.62404	P03915	P03915	NADH-ubiquinone oxidoreductase chain 5	MT-ND5	67.026
25.0143	25.1937	24.6075	24.4833	30.6461	30.8448	30.6876	30.4749	14	24.7	33.2832	100	+	+	7.19003	5.83865	8.53922	Q9NQC3	Q9NQC3	Reticulon-4	RTN4	129.93
22.1164	23.2349	20.9279	21.2661	25.1678	25.214	25.2434	24.6086	11	7	27.7919	18	+	+	2.98436	3.17214	3.06186	Q09666	Q09666	Neuroblast differentiation-associated protein AHNAK	AHNAK	629.09
22.4637	21.9992	21.7491	22.332	24.6058	24.5239	25.3011	25.8667	3	10.5	27.8275	13	+	+	3.77079	2.9384	3.43495	F5H6I7;Q6DD88	F5H6I7;Q6DD88	Atlastin-3	ATL3	58.772
22.7428	23.2957	22.1064	21.2005	25.1264	24.8893	25.0175	24.7092	6	29.2	27.9135	10	+	+	2.88622	2.59928	2.71118	K7ERV3;P04183;K7ES52;K7ERJ1;K7ENW5	K7ERV3;P04183;K7ES52;K7ERJ1	Thymidine kinase;Thymidine kinase, cytosolic	TK1	28.594
21.6381	21.5969	22.5499	23.5594	24.7843	24.1921	24.5564	24.7821	4	14.1	27.5619	14	+	+	2.44865	2.24264	2.27944	Q9Y276;C9J8G3;C9JAS4;C9J4Q9;C9J1S9;H7C492	Q9Y276;C9J8G3;C9JAS4	Mitochondrial chaperone BCS1	BCS1L	47.534
20.9543	23.4253	22.212	21.2034	23.9895	23.8918	24.2556	24.036	3	22.7	26.7136	9	+	+	1.99133	2.09446	1.962	O95881	O95881	Thioredoxin domain-containing protein 12	TXNDC12	19.206
23.0193	22.8465	22.693	22.8112	25.9217	26.9986	26.2232	26.2161	7	18.8	29.0413	22	+	+	5.18172	3.49744	4.72507	O95202	O95202	LETM1 and EF-hand domain-containing protein 1, mitochondrial	LETM1	83.353
22.776	22.6264	21.9924	21.7502	26.3977	26.1962	26.0585	26.308	5	14.1	28.7985	17	+	+	5.32021	3.95384	5.22196	O75844	O75844	CAAX prenyl protease 1 homolog	ZMPSTE24	54.812
23.1095	21.3486	22.0781	21.6563	24.5637	24.9322	25.4621	25.2215	6	11.5	27.7786	24	+	+	3.36229	2.99676	3.22201	Q9Y2U8	Q9Y2U8	Inner nuclear membrane protein Man1	LEMD3	99.996
21.5885	22.1001	22.8334	22.5489	24.4836	23.8629	24.4169	24.6776	4	14.1	27.0303	10	+	+	3.18929	2.09249	2.54133	A0A0A0MSK5;Q5JTV8;H0YD16;J3KN66;H0YDU3;H0Y4R4	A0A0A0MSK5;Q5JTV8;H0YD16;J3KN66;H0YDU3	Torsin-1A-interacting protein 1	TOR1AIP1	52.406
23.2166	22.3134	23.1068	22.6589	24.9543	24.7823	25.4783	24.8935	5	14.9	27.5787	19	+	+	3.83431	2.2032	2.9004	Q96A33	Q96A33	Coiled-coil domain-containing protein 47	CCDC47	55.873
22.5765	20.3781	21.8308	22.4167	24.5654	23.6353	24.5676	23.8583	5	3.2	26.7062	9	+	+	2.26517	2.35613	2.23227	Q5UIP0;H7BZN3;H7C2B5	Q5UIP0;H7BZN3	Telomere-associated protein RIF1	RIF1	274.46
25.495	25.5636	25.3425	25.6463	28.036	28.4201	27.8116	28.424	17	29.7	30.8831	68	+	+	5.45597	2.66108	4.00698	Q01813;B1APP8;Q5VSR5;H0Y757;B1APP6;V9GYV7;H0Y3Y3;V9GY25	Q01813	ATP-dependent 6-phosphofructokinase, platelet type	PFKP	85.595
22.7118	21.5203	22.9708	25.6391	27.4181	27.5904	27.4069	27.156	12	40.7	30.1002	35	+	+	2.51733	4.18236	3.04492	P22830;K7ELX4;K7EJX5;K7EKP7;K7EJM8	P22830;K7ELX4	Ferrochelatase, mitochondrial	FECH	47.862
22.0088	22.4454	22.057	21.4088	25.5056	25.1229	25.4853	25.0597	4	23	27.8272	13	+	+	5.00312	3.3134	4.45269	K7ESP4;Q8WVC6	K7ESP4;Q8WVC6	Dephospho-CoA kinase domain-containing protein	DCAKD	24.177
22.0692	21.4526	22.2281	20.9709	26.264	26.3225	25.985	26.7699	4	17.3	28.9048	14	+	+	5.08517	4.65514	5.59462	Q9NUJ1	Q9NUJ1	Mycophenolic acid acyl-glucuronide esterase, mitochondrial	ABHD10	33.932
22.2923	22.0057	22.0688	21.2503	24.4678	24.1646	24.1268	25.0851	5	11	27.4187	11	+	+	3.71246	2.55681	3.13014	E7ESY4;Q13330;H0Y4T7	E7ESY4;Q13330;H0Y4T7	Metastasis-associated protein MTA1	MTA1	79.372
23.4082	24.0587	23.6299	21.8937	28.8719	29.3163	29.9627	29.4534	18	48.5	32.0558	64	+	+	4.64827	6.15342	6.0218	Q5VV42	Q5VV42	Threonylcarbamoyladenosine tRNA methylthiotransferase	CDKAL1	65.111
23.8119	23.163	21.0294	22.1971	27.5873	27.9626	28.0551	28.1787	8	19.1	30.4991	32	+	+	3.89893	5.39558	4.82116	Q9NVH1;Q5TH61;B1AK20	Q9NVH1;Q5TH61;B1AK20	DnaJ homolog subfamily C member 11	DNAJC11	63.277
21.2734	21.3851	21.1692	21.533	26.5375	26.4087	26.454	26.7568	3	24.3	29.1559	14	+	+	8.22666	5.19907	8.52644	F8W7Q4;Q96A26;E9PH05	F8W7Q4;Q96A26;E9PH05	Protein FAM162A	FAM162A	16.515
22.1269	21.5756	22.8083	23.0796	27.1767	27.2852	27.554	27.4028	7	26	29.9097	24	+	+	5.11879	4.95711	5.83901	G5E9Z2;Q96KA5	G5E9Z2;Q96KA5	Cleft lip and palate transmembrane protein 1-like protein	CLPTM1L	43.28
21.9656	22.1194	22.5195	21.2877	26.5674	26.8478	26.599	26.7879	4	20	29.2746	13	+	+	5.6937	4.72748	6.1742	Q9NX40;D6R918;D6RBC5;D6RDI5;D6RA54;D6RC55;D6RG39;D6RIT9;D6RBN5;D6RF07	Q9NX40;D6R918;D6RBC5;D6RDI5;D6RA54;D6RC55;D6RG39;D6RIT9;D6RBN5	OCIA domain-containing protein 1	OCIAD1	27.626
22.4834	21.5046	21.6938	21.6684	25.7548	25.9626	26.0641	26.0173	5	10.9	28.5689	13	+	+	5.70951	4.11215	5.63555	B5MCF9;O00541;B3KXD6	B5MCF9;O00541	Pescadillo homolog	PES1	66.077
22.6854	22.4066	22.0148	22.1153	26.364	26.1824	26.0898	27.0133	7	24.2	29.0514	24	+	+	5.41372	4.10684	5.42161	H3BSM7;Q96GQ5;H3BR29;H3BTA0;H3BS97	H3BSM7;Q96GQ5;H3BR29	RUS1 family protein C16orf58	C16orf58	50.783
22.5416	21.4785	22.1371	21.6213	25.2031	25.9282	26.0247	25.9225	7	19	28.3455	22	+	+	4.76609	3.82498	4.72485	Q96KC8;Q5T1X2	Q96KC8	DnaJ homolog subfamily C member 1	DNAJC1	63.882
22.5023	22.6931	22.3459	23.2234	25.7728	25.8177	26.5602	27.4611	6	23.7	29.138	14	+	+	3.82038	3.71178	3.94911	Q9NVI7	Q9NVI7	ATPase family AAA domain-containing protein 3A	ATAD3A	71.368
22.6801	21.3832	21.9478	22.5251	25.9583	25.2386	26.4319	25.0018	6	18.4	28.2807	16	+	+	3.6826	3.52361	3.74023	O96005;K7EQQ1;K7ERL5	O96005;K7EQQ1	Cleft lip and palate transmembrane protein 1	CLPTM1	76.096
22.3442	22.5076	22.3868	22.2695	25.9077	25.6689	25.7778	26.0111	4	35	28.3528	18	+	+	7.69312	3.46436	5.8737	P42167;G5E972;H0YJH7	P42167;G5E972;H0YJH7	Lamina-associated polypeptide 2, isoforms beta/gamma;Thymopoietin;Thymopentin	TMPO	50.67
21.22	22.7308	22.7459	22.2422	25.6408	25.9008	25.4851	25.4874	6	20.9	28.3035	20	+	+	4.01742	3.39381	3.89634	Q14318;U3KQ64;A0A0A0MTJ1;U3KQI1;M0R2K9;M0R1Q0;M0R1S6;M0R2Q6	Q14318;U3KQ64;A0A0A0MTJ1	Peptidyl-prolyl cis-trans isomerase FKBP8	FKBP8	44.561
21.6232	22.2042	21.8336	22.2814	25.2548	25.8256	25.5324	24.8371	3	12.3	28.0739	7	+	+	4.87713	3.3769	4.43444	H0YNG3;P67812;H0YKT4;H0YNX5;H0YNA5	H0YNG3;P67812;H0YKT4	Signal peptidase complex catalytic subunit SEC11;Signal peptidase complex catalytic subunit SEC11A	SEC11A	18.651
21.8428	21.8798	21.2087	21.9707	24.1577	24.8461	25.0178	24.6451	3	17.6	27.5995	16	+	+	4.59377	2.94115	3.89603	A0A087X2D5;Q9BRJ2;A0A0G2JMS5;A0A087WU62	A0A087X2D5;Q9BRJ2;A0A0G2JMS5;A0A087WU62	39S ribosomal protein L45, mitochondrial	MRPL45	35.29
22.1096	22.8294	22.5893	22.1045	24.9988	25.1117	25.16	25.5619	3	31.7	27.7869	13	+	+	4.85953	2.79991	3.8977	J3KQ48;Q9Y3E5	J3KQ48;Q9Y3E5	Peptidyl-tRNA hydrolase 2, mitochondrial	PTRH2	19.325
21.3173	22.4619	22.1531	22.5491	25.7674	25.5826	22.4172	25.4186	4	13.6	27.7212	9	+	+	1.71371	2.67609	1.99063	Q3SXM5;H3BQI7;H3BT52;H3BNH5	Q3SXM5;H3BQI7;H3BT52	Inactive hydroxysteroid dehydrogenase-like protein 1	HSDL1	37.001
22.3219	22.0538	22.79	22.6712	25.2181	24.8071	24.6464	25.7057	5	14	27.9655	14	+	+	4.00035	2.63508	3.33516	O43172	O43172	U4/U6 small nuclear ribonucleoprotein Prp4	PRPF4	58.449
21.2999	23.1311	22.0006	21.585	24.6315	24.5648	24.2977	24.4954	5	11.8	27.7208	11	+	+	3.05384	2.4932	2.74386	P78395;A0A0G2JRX7;H7C2P3;E7EW99;E7EMH2;B5MD04;A0A0G2JRX8;B5MCY4	P78395;A0A0G2JRX7;H7C2P3;E7EW99	Melanoma antigen preferentially expressed in tumors	PRAME	57.889
21.5354	21.9294	22.2203	22.1111	24.2838	23.9131	25.5271	23.6399	6	29	27.6385	9	+	+	2.77805	2.39192	2.53619	Q9P287	Q9P287	BRCA2 and CDKN1A-interacting protein	BCCIP	35.979
22.2307	22.7894	21.2482	22.1621	23.0484	24.2628	24.2505	24.8254	3	4.3	26.832	3	+		2.16956	1.98918	2.00559	Q13136;R4GNF1;F8VWR9;E9PPF6;H0YD72;H0YDW2;E9PJZ7;R4GN36;B1APN9;G3V200;O75335;O75145;O75334	Q13136	Liprin-alpha-1	PPFIA1	135.78
22.4333	21.6192	22.4885	21.7167	24.1067	24.0113	24.0384	23.931	3	11.8	27.2141	7	+		3.811	1.95741	2.67084	Q52LJ0	Q52LJ0	Protein FAM98B	FAM98B	37.19
22.7662	22.6782	22.7446	21.5254	24.3209	24.0346	25.4662	23.652	5	19.6	27.2943	16	+		2.11266	1.93981	1.95226	Q9Y320;E9PSF0;E9PRL5;H3BSU7;E9PLR1;G3V155	Q9Y320	Thioredoxin-related transmembrane protein 2	TMX2	34.037
21.7688	21.8527	21.4224	22.1996	23.8121	23.9318	23.2581	23.966	4	10.4	26.3002	9	+		3.8162	1.93115	2.64807	Q9UJ14;A2A2G5	Q9UJ14	Gamma-glutamyltransferase 7;Gamma-glutamyltransferase 7 heavy chain;Gamma-glutamyltransferase 7 light chain	GGT7	70.466
21.6706	21.3998	21.5988	22.2656	22.8303	23.7976	24.0289	23.9995	3	5.3	26.3361	4	+		2.90051	1.93042	2.30216	Q8NI60	Q8NI60	Atypical kinase ADCK3, mitochondrial	ADCK3	71.949
28.1627	28.3443	28.1907	28.6999	29.9131	30.2797	30.5224	30.3692	12	58.5	33.1749	100	+		4.41554	1.92176	2.83084	A0A0A0MR02;P45880;Q5JSD2;A2A3S1	A0A0A0MR02;P45880;Q5JSD2	Voltage-dependent anion-selective channel protein 2	VDAC2	30.348
22.6003	22.8123	22.5928	21.9615	24.8537	23.9158	24.5376	24.332	7	7.6	27.1148	7	+		3.41518	1.91804	2.49364	E3W994;J3KR49;O75122;A0A0U1RQI6;E7ERI8;E7EW49;C9J668;H7C5M8;D6RBU8;B3KR06;E7ENG2;H7C4X8	E3W994;J3KR49;O75122;A0A0U1RQI6;E7ERI8;E7EW49	CLIP-associating protein 2	CLASP2	138.86
22.3608	21.995	22.6576	21.0999	23.8635	24.0377	23.891	23.9894	6	7.4	26.5097	8	+		2.87302	1.91704	2.28132	Q8TEQ8	Q8TEQ8	GPI ethanolamine phosphate transferase 3	PIGO	118.7
22.9893	21.6509	21.7946	21.9797	23.622	23.9388	24.8151	23.6561	5	7.5	27.4512	14	+		2.4469	1.90439	2.08994	Q9NYY8	Q9NYY8	FAST kinase domain-containing protein 2	FASTKD2	81.462
21.597	22.7425	23.1179	22.3464	24.2058	24.2771	24.1591	24.6719	5	7.1	27.1456	17	+		2.79155	1.87754	2.22008	Q92797;M0R3C7;A0A087WUE9;M0R1C2;M0R180;M0QXP5	Q92797;M0R3C7;A0A087WUE9	Symplekin	SYMPK	141.15
21.9533	21.8822	20.8928	21.9376	23.6912	23.943	22.9872	23.5487	4	6.4	26.4736	16	+		2.90666	1.87604	2.2655	B7WPE2;Q32P44;G3V195;H7C355;H0Y3M3;G3V1D0	B7WPE2;Q32P44;G3V195;H7C355;H0Y3M3	Echinoderm microtubule-associated protein-like 3	EML3	95.283
22.4587	22.9233	22.9085	21.978	24.7118	24.8349	24.0029	24.1402	5	14.4	27.3134	11	+		3.05178	1.85532	2.30655	Q96I99;E9PDQ8;H0Y852	Q96I99;E9PDQ8	Succinyl-CoA ligase [GDP-forming] subunit beta, mitochondrial	SUCLG2	46.51
23.1888	22.5354	22.3739	22.1607	24.4009	25.2653	24.3241	23.6373	5	14.1	27.0932	8	+		2.432	1.84221	2.04549	Q96AD5;B1AHL9;Q7Z6Z6	Q96AD5	Patatin-like phospholipase domain-containing protein 2	PNPLA2	55.315
22.8943	22.3661	21.9052	22.4374	24.6599	23.786	23.8874	24.5941	3	7.8	27.1078	6	+		3.00962	1.83109	2.27184	Q08752	Q08752	Peptidyl-prolyl cis-trans isomerase D	PPID	40.763
23.9015	23.5811	23.8274	22.0754	25.1757	24.8415	25.2928	25.3663	3	21.6	28.0449	16	+		2.19672	1.82271	1.92968	A0A087WUC6;E9PI68;Q15005;E9PRB9;E9PL01;H0YE04	A0A087WUC6;E9PI68;Q15005;E9PRB9;E9PL01	Signal peptidase complex subunit 2	SPCS2	25.09
21.9012	21.6362	21.8539	22.7301	23.8445	23.7101	23.3381	24.4838	4	20.4	26.6749	11	+		2.76093	1.81375	2.16279	E9PHI6;Q9Y6G9;C9JGM7	E9PHI6;Q9Y6G9	Cytoplasmic dynein 1 light intermediate chain 1	DYNC1LI1	43.193
24.0308	23.7989	24.1639	24.3008	25.5732	26.1387	25.8985	25.8393	8	16.8	28.7361	29	+		4.54924	1.78884	2.71935	Q13586;G0XQ39;E9PNJ4;H0YDB2;E9PIQ8;E9PRE4;E9PR07;E9PJ19;E9PMB4;E9PRZ7;E9PR09;E9PN27	Q13586;G0XQ39;E9PNJ4	Stromal interaction molecule 1	STIM1	77.422
21.6057	22.5432	23.1174	22.0475	24.4642	24.7762	23.5364	23.6434	4	10.7	27.3644	9	+		2.1398	1.77658	1.8782	A0A0A0MTN9;A0A0A0MTR6;A0A0C4DFN8;A0A0A0MSZ4;A0A0A0MT64;P22570;A0A0C4DGN7;J3QQX3;J3QKZ8	A0A0A0MTN9;A0A0A0MTR6;A0A0C4DFN8;A0A0A0MSZ4;A0A0A0MT64;P22570;A0A0C4DGN7;J3QQX3	NADPH:adrenodoxin oxidoreductase, mitochondrial	FDXR	48.027
22.794	22.379	22.8195	22.4877	23.7401	24.7092	24.3506	24.7689	5	14.4	27.171	8	+		3.30506	1.77215	2.32991	Q9NX61;K7EQ34;U3KQT6;K7EPA3;K7EKY7;V9GYP8;K7EQE7	Q9NX61;K7EQ34;U3KQT6;K7EPA3	Transmembrane protein 161A	TMEM161A	53.601
29.4748	29.7783	29.7206	30.1881	31.3604	31.8757	31.3283	31.653	37	50	34.4432	292	+		3.96816	1.76386	2.53156	O14980;C9JKM9;C9J673;C9IZS4;C9JQ02;C9JV99;F8WF71;C9JF49;C9IYM2;H7BZC5	O14980	Exportin-1	XPO1	123.38
22.5946	23.0137	22.2309	21.935	24.0476	24.5706	23.8668	24.2047	3	52.6	26.9703	9	+		3.10654	1.72889	2.22526	Q13885;Q9BVA1	Q13885;Q9BVA1	Tubulin beta-2A chain;Tubulin beta-2B chain	TUBB2A;TUBB2B	49.906
22.569	22.6204	23.0982	21.6962	23.6948	24.7418	23.9032	24.4651	5	4.5	26.926	10	+		2.38256	1.70526	1.93841	Q04656	Q04656	Copper-transporting ATPase 1	ATP7A	163.37
22.5056	21.7455	22.3262	21.4173	23.6887	23.3483	24.032	23.7225	5	1.8	26.3288	15	+		2.97113	1.69924	2.15418	Q7Z7G8;H0YB72	Q7Z7G8	Vacuolar protein sorting-associated protein 13B	VPS13B	448.66
23.0476	22.4744	22.4516	21.6448	23.9933	24.2143	23.8908	24.2767	4	15.7	27.2038	12	+		2.85432	1.68917	2.10519	Q13148;A0A087WX29;B1AKP7;G3V162;A0A087X260;A0A087WYY0;A0A087WZC9;A0A087WW61;A0A087WX67;A0A087WXV3;A0A087WXQ5;A0A087WV68;K7EN94;A0A087WTZ4;K7EL26;A0A087WZM1;K7EJ99;A0A0A0MSV7;A0A087WYE7;K7EJM5	Q13148;A0A087WX29;B1AKP7;G3V162;A0A087X260;A0A087WYY0;A0A087WZC9;A0A087WW61;A0A087WX67;A0A087WXV3;A0A087WXQ5;A0A087WV68;K7EN94	TAR DNA-binding protein 43	TARDBP	44.739
22.5613	22.2235	21.6668	22.5965	24.1038	23.3051	24.1448	24.2342	4	24.7	26.6106	11	+		2.8303	1.68496	2.0934	O96011;H7C3V6	O96011	Peroxisomal membrane protein 11B	PEX11B	28.431
25.7412	26.5855	26.0854	25.9604	27.8346	27.5057	28.0986	27.6164	10	48.9	30.654	38	+		3.54904	1.67069	2.31521	P35232;C9JW96;C9JZ20;E7ESE2;E9PCW0;D6RBK0	P35232;C9JW96;C9JZ20;E7ESE2;E9PCW0;D6RBK0	Prohibitin	PHB	29.804
22.3527	23.101	23.2072	23.1878	24.572	24.6069	24.6101	24.5908	5	24.2	27.0977	14	+		3.68493	1.63278	2.31713	O14828	O14828	Secretory carrier-associated membrane protein 3	SCAMP3	38.287
21.5723	21.8499	22.5179	22.3109	24.1901	23.4812	23.5212	23.4825	3	18.7	26.4614	9	+		2.94126	1.60601	2.06802	P30044	P30044	Peroxiredoxin-5, mitochondrial	PRDX5	22.086
22.6461	22.9132	22.321	21.7635	24.0641	23.5999	24.1272	24.2226	3	51.9	26.7542	13	+		2.86652	1.59249	2.03247	F5H608;O75947	F5H608;O75947	ATP synthase subunit d, mitochondrial	ATP5H	8.9153
21.9002	22.3859	22.4912	23.2024	24.0849	24.3969	24.2015	23.5086	6	11.8	26.8736	10	+		2.48334	1.55306	1.87202	O75419;C9K087	O75419	Cell division control protein 45 homolog	CDC45	65.568
28.2484	27.9173	28.5623	28.3025	29.689	29.6735	29.8178	29.9411	8	35.7	32.6545	56	+		4.33213	1.52275	2.35517	Q9Y277;E5RJN6;E5RHZ6;E5RHE1;E5RFP6;E5RK27;E5RFL1	Q9Y277;E5RJN6;E5RHZ6;E5RHE1;E5RFP6	Voltage-dependent anion-selective channel protein 3	VDAC3	30.658
26.6598	26.8539	26.7325	27.0262	28.1873	28.4927	28.3645	28.2141	16	29.5	31.3021	74	+		5.07828	1.49657	2.46532	Q5T9A4	Q5T9A4	ATPase family AAA domain-containing protein 3B	ATAD3B	72.572
26.6404	26.164	26.7384	26.7802	27.9268	28.3416	27.6553	28.2266	8	18.4	31.0165	40	+		3.35377	1.45679	2.0523	O95831;E9PMA0	O95831	Apoptosis-inducing factor 1, mitochondrial	AIFM1	66.9
22.2673	22.4323	22.4544	21.626	23.4239	23.5596	23.568	24	3	9.9	26.1773	10	+		3.10745	1.44289	1.97376	Q9BRR6;H3BRS6;H3BN66;H3BU35	Q9BRR6;H3BRS6	ADP-dependent glucokinase	ADPGK	54.088
22.3603	22.641	22.67	22.6384	23.6949	23.8788	24.0157	24.4164	3	15.8	26.7632	6	+		3.80931	1.42404	2.12689	B4DQU5;H3BMH2;H3BSC1;P62491;Q15907	B4DQU5;H3BMH2;H3BSC1;P62491;Q15907	Ras-related protein Rab-11A;Ras-related protein Rab-11B	RAB11A;RAB11B	16.514
25.4475	24.9571	25.7222	25.196	26.7282	26.5562	26.633	26.9189	3	6.8	29.6385	23	+		3.55779	1.37836	2.02056	Q9NZ01;M0R3C3	Q9NZ01;M0R3C3	Very-long-chain enoyl-CoA reductase	TECR	36.034
24.7964	24.0426	24.4728	24.5471	25.9952	25.6927	25.5565	25.9227	7	12.1	28.738	24	+		3.40808	1.32705	1.93224	H7BXF4;B1PBA3;Q9NXE4;H7C1Q6;H7C0W5;H7C235;H7C2J2;F8WF03;F2Z2I0;F2Z2W5;C9J647;H7C2E2	H7BXF4;B1PBA3;Q9NXE4;H7C1Q6;H7C0W5	Sphingomyelin phosphodiesterase 4	SMPD4	94.584
29.2039	29.2148	29.2061	29.3272	30.1628	30.3807	30.3509	30.4658	25	45.9	33.3733	137	+		5.3616	1.10206	1.93166	P40939;H0YFD6	P40939	Trifunctional enzyme subunit alpha, mitochondrial;Long-chain enoyl-CoA hydratase;Long chain 3-hydroxyacyl-CoA dehydrogenase	HADHA	82.999
24.0909	24.0829	23.9449	24.0354	22.5531	22.4446	22.6444	23.1016	4	13.7	27.2828	7	+		4.01049	-1.3526	-2.08641	Q9BQC3;E9PLL2;E9PMH7;E9PJH6;H0YCR5	Q9BQC3;E9PLL2;E9PMH7	Diphthamide biosynthesis protein 2	DPH2	52.082
23.921	23.8353	24.0449	23.8092	22.3098	22.8227	22.3389	22.3993	4	5	26.3451	5	+		4.46312	-1.43495	-2.27396	Q14139;B7Z7P0	Q14139;B7Z7P0	Ubiquitin conjugation factor E4 A	UBE4A	122.56
23.8844	24.0469	24.6243	24.5318	23.4815	22.2804	22.5412	22.5146	4	24.8	27.3391	8	+		2.55728	-1.56741	-1.90841	O95336;M0R261;M0R1L2;M0R0U3	O95336;M0R261	6-phosphogluconolactonase	PGLS	27.547
23.5253	23.353	24.013	23.8909	21.4837	22.13	21.7319	22.4566	4	17.8	26.9311	10	+		3.23457	-1.74498	-2.28258	K7EP06;O43148;K7ERH6	K7EP06;O43148	mRNA cap guanine-N7 methyltransferase	RNMT	34.839
23.9162	24.0194	23.7237	24.0056	21.2176	22.4382	22.8018	22.078	4	8.1	26.7343	9	+		2.6748	-1.78236	-2.10665	Q2NL82;I3L1Q5	Q2NL82;I3L1Q5	Pre-rRNA-processing protein TSR1 homolog	TSR1	91.809
23.9291	24.0724	24.0975	23.8762	22.7824	21.8046	21.7512	22.4199	4	12.9	26.6029	13	+		3.39914	-1.80427	-2.38999	P49642;F8VSB2;F8VNY2	P49642	DNA primase small subunit	PRIM1	49.901
24.1235	25.1295	24.6776	24.4995	21.87	22.6852	22.5381	22.7845	3	8.6	27.1105	5	+		3.46817	-2.13809	-2.69479	Q96CB9	Q96CB9	5-methylcytosine rRNA methyltransferase NSUN4	NSUN4	43.088
24.295	24.0068	24.8589	24.6582	22.3189	21.8423	22.7521	22.1325	3	3	27.2178	11	+		3.73896	-2.19331	-2.8528	Q9Y4C2	Q9Y4C2	TRPM8 channel-associated factor 1	TCAF1	102.12
24.3158	25.2242	25.5764	26.1472	23.5361	22.6415	23.4815	21.7267	7	17.3	28.5701	20	+		2.29699	-2.4694	-2.30103	P10155;G5E9R9;D6RDN1;D6RE09;H0Y9N5	P10155	60 kDa SS-A/Ro ribonucleoprotein	TROVE2	60.67
24.5667	24.7776	24.9794	25.7201	21.9298	22.4215	22.4419	23.0586	5	12.9	28.0002	13	+		3.52655	-2.54802	-3.02905	Q96RS6	Q96RS6	NudC domain-containing protein 1	NUDCD1	66.755
24.7176	24.698	24.9246	24.9843	22.0776	22.2171	22.5216	22.2341	8	11.6	28.3604	12	+		6.21254	-2.56851	-4.15638	Q6IA86;K7ER35;F5GYE9;F5GWY6	Q6IA86	Elongator complex protein 2	ELP2	92.499
24.8875	25.5276	25.6083	25.1239	22.9446	23.437	21.9104	22.5746	4	20.9	28.6643	15	+		3.3947	-2.5702	-2.97534	P49721;A0A087WVV1	P49721;A0A087WVV1	Proteasome subunit beta type-2	PSMB2	22.836
25.3497	24.757	25.2416	25.5	22.4238	22.6764	21.8244	22.0784	5	55.4	28.3637	14	+		4.6895	-2.96132	-3.96399	P62140;E7ETD8;C9J9S3;C9JP48	P62140;E7ETD8;C9J9S3;C9JP48	Serine/threonine-protein phosphatase PP1-beta catalytic subunit;Serine/threonine-protein phosphatase	PPP1CB	37.186
21.9362	23.0035	22.8	21.7679	21.5005	22.417	21.9397	22.7021	3	15.1	24.8658	8			0.236155	-0.237091	-0.261677	Q6PJ69;K7EJ59;H0YGS7	Q6PJ69	Tripartite motif-containing protein 65	TRIM65	57.353
21.3962	21.3438	22.626	22.2999	23.5899	22.7442	23.536	23.0333	3	10.2	25.7787	4			1.85568	1.30937	1.48531	D6RAX7;D6RFN0;Q9BT78;D6RD63	D6RAX7;D6RFN0;Q9BT78	COP9 signalosome complex subunit 4	COPS4	47.726
22.521	22.7366	23.0877	22.1582	22.1288	20.9841	21.0189	21.5014	4	3.8	24.6399	16			1.98521	-1.21759	-1.46525	A6NNK5;Q12888;H7BZY0	A6NNK5;Q12888	Tumor suppressor p53-binding protein 1	TP53BP1	209.02
22.3259	22.0255	22.2966	21.9367	23.3596	22.9999	23.1637	23.1425	3	4.5	26.2315	4			3.79607	1.02027	1.63995	A0A087X211;Q8TCG1	A0A087X211;Q8TCG1	Protein CIP2A	KIAA1524	102.28
21.0021	23.046	21.7896	21.5031	21.4578	21.9654	21.5394	22.1369	3	4.9	24.9928	13			0.0452652	-0.0603371	-0.0625189	A0A075B784;Q9P275;E9PEW0;K7EQS0;K7EPT1;K7ELR5;Q8IXW9	A0A075B784;Q9P275;E9PEW0	Ubiquitin carboxyl-terminal hydrolase;Ubiquitin carboxyl-terminal hydrolase 36	USP36	104.39
21.5339	22.4094	21.3078	22.495	23.2967	23.3286	22.83	22.7931	4	12.2	26.7923	15			1.81832	1.1256	1.34832	E9PFF5;B4DXZ6;P51114;E7EU85;C9JAJ4	E9PFF5;B4DXZ6;P51114;E7EU85	Fragile X mental retardation syndrome-related protein 1	FXR1	55.105
23.3286	21.9456	21.7475	23.1995	24.3095	23.2723	24.5526	23.6766	3	5.2	26.8368	11			1.4867	1.39744	1.39011	Q9UBB6;C9J5H8	Q9UBB6;C9J5H8	Neurochondrin	NCDN	78.863
23.8971	23.0562	21.3179	23.0689	21.7927	21.1483	21.5756	22.2793	3	20.7	26.992	11			0.98656	-1.13604	-1.04088	P48047;H7C068	P48047;H7C068	ATP synthase subunit O, mitochondrial	ATP5O	23.277
23.6096	24.0104	22.0169	23.5459	23.6972	23.7806	23.4188	24.1214	3	9.9	26.9391	10			0.445125	0.458763	0.477006	P55263	P55263	Adenosine kinase	ADK	40.545
23.5531	21.7864	23.7711	24.2188	21.7159	22.4445	21.5109	22.3806	3	10.7	26.9726	13			1.1919	-1.31936	-1.21823	Q9Y383;A0A0A6YYJ8;V9GZ75;F8WEU3	Q9Y383;A0A0A6YYJ8	Putative RNA-binding protein Luc7-like 2	LUC7L2	46.513
22.4783	24.398	24.9164	25.2771	24.2793	24.4775	24.6451	24.546	4	17.7	27.9209	18			0.131639	0.219556	0.194666	K7EQ02;K7EQ55;K7EK33;Q96EP5	K7EQ02;K7EQ55;K7EK33;Q96EP5	DAZ-associated protein 1	DAZAP1	35.02
22.0902	22.5939	22.364	22.4191	22.1608	22.587	21.7709	22.9777	3	2.9	25.6001	12			0.00868763	0.00728035	0.0093177	Q6PL18;A0A0B4J211	Q6PL18;A0A0B4J211	ATPase family AAA domain-containing protein 2	ATAD2	158.55
23.4117	23.8399	21.2152	23.632	22.9737	22.1763	23.3403	23.9852	3	2.2	26.7882	15			0.0458599	0.0941625	0.0773821	Q7Z6E9;I3L3Y2;H3BUN0	Q7Z6E9	E3 ubiquitin-protein ligase RBBP6	RBBP6	201.56
22.4468	22.0463	23.1107	23.5462	23.0197	23.2127	23.1716	23.0083	3	26.5	26.3719	10			0.411584	0.315611	0.376226	B1AHD1;P55769	B1AHD1;P55769	NHP2-like protein 1;NHP2-like protein 1, N-terminally processed	NHP2L1	14.627
21.8539	22.6543	23.4823	22.7584	23.8923	23.6645	22.8679	23.8827	3	12.3	26.1309	5			1.1301	0.889586	0.975516	Q9BTY7	Q9BTY7	Protein HGH1 homolog	HGH1	42.129
22.3414	21.963	21.2759	21.9765	22.2238	22.1964	21.6478	22.9881	3	3.9	25.0266	9			0.480921	0.374842	0.438917	A0A0U1RQK7;A0A0A0MSA7;O43432	A0A0U1RQK7;A0A0A0MSA7;O43432	Eukaryotic translation initiation factor 4 gamma 3	EIF4G3	195.27
24.3132	23.0054	22.8871	22.6842	24.1427	24.3752	24.8063	24.5286	3	10.8	27.5049	11			1.69846	1.24072	1.38641	O15269	O15269	Serine palmitoyltransferase 1	SPTLC1	52.743
23.0523	22.7014	22.8468	21.9011	22.837	24.0736	21.1627	22.8789	3	3.8	26.3958	15			0.0615101	0.112648	0.0980273	P42336	P42336	Phosphatidylinositol 4,5-bisphosphate 3-kinase catalytic subunit alpha isoform	PIK3CA	124.28
22.0379	22.5205	22.0675	21.635	21.6351	21.9942	22.3494	22.6363	3	11.4	25.0866	10			0.116489	0.0885262	0.11311	F8WBI9;E9PEC3;E7ETT4;E7EUY3;E7ETT1;E9PDR0;C9JQS9;E7EX59;P05166;E7ENC1	F8WBI9;E9PEC3;E7ETT4;E7EUY3;E7ETT1;E9PDR0;C9JQS9;E7EX59;P05166;E7ENC1	Propionyl-CoA carboxylase beta chain, mitochondrial	PCCB	43.712
22.7881	25.2548	25.5548	25.9638	25.5135	25.3207	22.5068	24.9872	3	24.2	28.5366	17			0.114363	-0.308394	-0.205425	P25398	P25398	40S ribosomal protein S12	RPS12	14.515
21.7403	23.3547	21.9422	22.0897	23.3359	22.861	22.4531	22.5298	3	12.3	25.7432	12			0.578614	0.513229	0.560038	P30154	P30154	Serine/threonine-protein phosphatase 2A 65 kDa regulatory subunit A beta isoform	PPP2R1B	66.213
22.421	22.4139	21.9188	24.0122	22.4953	23.7134	23.5623	23.7586	3	6.9	26.5863	12			0.599077	0.690927	0.661285	O00186	O00186	Syntaxin-binding protein 3	STXBP3	67.764
22.9733	23.0598	23.041	21.8112	23.5116	23.22	23.541	24.1645	3	14.8	26.3297	7			1.29996	0.887931	1.02871	S6FRS6;Q9NSI8	S6FRS6;Q9NSI8	SAM domain-containing protein SAMSN-1	SAMSN1	34.178
21.3046	20.9246	22.3521	21.6743	23.0508	23.2663	22.7015	22.6646	3	13.7	25.9601	11			2.16305	1.35686	1.62192	M0R0Y2;M0R2M1;P54920;M0R027;M0R058;A0A087WZQ7;Q9H115;M0R213;M0R0I4	M0R0Y2;M0R2M1;P54920;M0R027;M0R058;A0A087WZQ7;Q9H115	Alpha-soluble NSF attachment protein;Beta-soluble NSF attachment protein	NAPA;NAPB	29.163
25.3985	25.1997	22.4386	23.7	24.9297	25.6052	25.4492	24.7785	3	9.1	28.4999	16			0.671535	1.00644	0.823266	O75306	O75306	NADH dehydrogenase [ubiquinone] iron-sulfur protein 2, mitochondrial	NDUFS2	52.545
22.0667	23.457	21.9545	23.3998	23.5859	23.4802	23.3877	23.4533	4	5	26.5116	16			0.936304	0.757265	0.830205	A0A0A0MTP6;O15357;F5GY16	A0A0A0MTP6;O15357	Phosphatidylinositol 3,4,5-trisphosphate 5-phosphatase 2	INPPL1	126.52
22.1226	23.2581	22.2851	22.7234	23.4631	22.4807	22.8716	22.1785	4	24.4	26.0739	13			0.153862	0.151179	0.172548	A0A0A0MRN7;Q6YP21;A0A0A0MRN6	A0A0A0MRN7;Q6YP21;A0A0A0MRN6	Kynurenine--oxoglutarate transaminase 3	CCBL2	29.471
22.0152	22.3354	22.6319	21.8802	22.6472	23.0156	22.7153	22.9571	4	5.9	25.9361	11			1.75095	0.618115	0.894617	Q9Y2W1	Q9Y2W1	Thyroid hormone receptor-associated protein 3	THRAP3	108.66
22.7535	22.555	21.5974	23.3661	22.7953	22.4226	23.378	22.2401	3	2.5	25.7223	7			0.118117	0.140961	0.149251	Q14674	Q14674	Separin	ESPL1	233.17
23.4362	23.4034	23.1358	21.5951	22.7827	22.4166	22.9252	22.9725	4	3	26.1598	14			0.0949543	-0.118383	-0.123903	Q13129	Q13129	Zinc finger protein Rlf	RLF	217.95
21.7998	22.6167	21.6374	22.2533	22.1376	22.0254	23.6659	21.6508	4	16.5	25.4377	8			0.239024	0.293103	0.294042	P50613;D6R9G1;D6RAD4;D6REC6;D6RFL0;D6RGG9;D6RI01;D6R9Z2;D6RF14;D6RIG9;A0A0D9SFW9	P50613;D6R9G1;D6RAD4;D6REC6	Cyclin-dependent kinase 7	CDK7	39.038
23.0092	22.4552	22.9906	22.7024	22.5609	22.783	22.6512	22.5947	3	12.8	25.9697	13			0.454291	-0.14191	-0.221576	A0A0B4J216;Q6IA69;H0YDH3;H0YED2;E9PNF5	A0A0B4J216;Q6IA69;H0YDH3	Glutamine-dependent NAD(+) synthetase	NADSYN1	37.493
22.0283	22.1565	25.6599	25.3692	25.02	24.971	24.643	22.7074	3	28	28.2777	12			0.183721	0.531897	0.325903	P31946	P31946	14-3-3 protein beta/alpha;14-3-3 protein beta/alpha, N-terminally processed	YWHAB	28.082
22.1031	26.8641	26.1795	26.1185	24.8513	26.3683	26.7295	26.3669	3	39.1	29.5336	9			0.270874	0.762726	0.458894	P35268;K7EJT5;K7EP65;K7EKS7;K7ELC4;K7EMH1;K7ERI7	P35268;K7EJT5;K7EP65;K7EKS7;K7ELC4;K7EMH1;K7ERI7	60S ribosomal protein L22	RPL22	14.787
21.7729	23.1336	23.3266	23.1789	23.1601	22.6272	23.9577	23.4302	3	9.7	26.682	8			0.430344	0.440807	0.460994	Q15645;H0YAL2	Q15645;H0YAL2	Pachytene checkpoint protein 2 homolog	TRIP13	48.55
22.3107	21.029	23.0854	21.9122	22.626	23.4706	24.2737	23.5929	3	10.5	26.3548	8			1.37867	1.40645	1.34549	Q9H3M7	Q9H3M7	Thioredoxin-interacting protein	TXNIP	43.661
21.8263	22.6946	23.0221	21.2202	22.6787	22.5509	22.16	22.2115	3	3.8	25.7201	14			0.191732	0.20944	0.225334	Q96HW7;E9PIM3;F8WAA7	Q96HW7;E9PIM3;F8WAA7	Integrator complex subunit 4	INTS4	108.17
21.2301	21.747	22.895	22.6272	22.7944	21.837	23.2683	22.8491	4	6.8	25.982	11			0.529867	0.562399	0.567794	Q96TA1	Q96TA1	Niban-like protein 1	FAM129B	84.137
22.449	21.9206	21.6175	23.2958	23.2707	23.5496	23.1829	23.0613	4	13.1	25.9868	13			1.3174	0.945368	1.07183	C9JVB6;Q7L0Y3	C9JVB6;Q7L0Y3	Mitochondrial ribonuclease P protein 1	TRMT10C	36.828
21.1136	23.1291	22.8498	23.6702	23.4911	23.276	23.1	23.0514	4	9.7	26.4049	11			0.426861	0.538921	0.507695	Q9UJX2	Q9UJX2	Cell division cycle protein 23 homolog	CDC23	68.833
22.8024	22.6351	23.3404	23.0703	23.226	22.7465	23.5417	22.6341	3	25.7	26.2792	7			0.105458	0.0749974	0.0984064	I3L3X9;I3L1H5;Q9BZG8;V9GYS2;U3KQN3	I3L3X9;I3L1H5;Q9BZG8	Diphthamide biosynthesis protein 1	DPH1	16.165
21.6501	22.5541	22.3222	22.2357	23.1355	23.7953	22.7017	21.7968	4	2.7	25.6878	5			0.703033	0.666841	0.693938	Q6YHU6;B5MC89;H7BYZ4;B6ZDE5;F5H3M9;H0Y3V5	Q6YHU6;B5MC89;H7BYZ4	Thyroid adenoma-associated protein	THADA	219.6
23.3457	21.7665	22.0884	22.1399	23.8539	23.9019	23.8683	23.7708	3	13	26.7607	8			2.31672	1.51361	1.78501	A0A087X2E5;A0A087WZN1;O43837	A0A087X2E5;A0A087WZN1;O43837	Isocitrate dehydrogenase [NAD] subunit, mitochondrial;Isocitrate dehydrogenase [NAD] subunit beta, mitochondrial	IDH3B	41.219
22.364	21.2236	22.0637	22.4144	22.6221	22.5609	23.2874	22.5606	3	8.3	25.8925	10			1.19249	0.741315	0.895914	Q9NVH6	Q9NVH6	Trimethyllysine dioxygenase, mitochondrial	TMLHE	49.517
22.6567	23.0342	24.1524	23.3414	23.0986	23.0319	22.7261	23.0389	3	13.8	26.2278	16			0.437953	-0.322322	-0.388903	Q00534	Q00534	Cyclin-dependent kinase 6	CDK6	36.938
22.271	22.7761	20.8573	24.6162	23.2385	23.4694	23.1045	23.2683	3	15.4	26.646	10			0.353203	0.640061	0.499943	Q9BYG3;C9J808;H7BZL0;C9J6C5	Q9BYG3;C9J808	MKI67 FHA domain-interacting nucleolar phosphoprotein	NIFK	34.222
22.6603	23.423	21.1689	22.8657	23.5134	23.0921	23.6434	23.3956	3	9.1	26.5718	13			0.901386	0.881661	0.885647	P48637	P48637	Glutathione synthetase	GSS	52.384
22.1293	23.3022	22.7834	22.3326	23.3084	23.5483	23.4686	23.7559	4	8.9	26.5482	14			1.72714	0.883438	1.13757	O95376;C9JZ71	O95376	E3 ubiquitin-protein ligase ARIH2	ARIH2	57.818
23.1771	23.6476	23.6214	24.1415	23.7483	23.5464	23.0667	23.3005	4	14.4	26.8419	19			0.415797	-0.231448	-0.310072	F6VRR5;Q9BY77;Q8WUT1;F8WCX5;Q6R954;F8WEE2	F6VRR5;Q9BY77;Q8WUT1;F8WCX5	Polymerase delta-interacting protein 3	POLDIP3	48.103
20.883	22.8699	23.2225	23.4251	22.7188	23.0436	22.6111	22.2396	4	5.5	26.0628	13			0.0300887	0.053143	0.048014	P32019;E7ESY0;B1ARF3	P32019;E7ESY0;B1ARF3	Type II inositol 1,4,5-trisphosphate 5-phosphatase	INPP5B	112.85
22.4731	22.255	22.6219	22.6347	23.3789	23.8386	23.7511	23.725	4	9.4	26.2579	10			3.91339	1.17723	1.85598	Q8TAD4;Q9BY48;D6REM2	Q8TAD4;Q9BY48	Zinc transporter 5	SLC30A5	84.046
24.9153	22.885	24.3967	24.6395	25.2497	25.5711	25.6092	26.036	4	19.7	28.5712	16			1.57536	1.40739	1.43353	O96008;K7EJ57;K7EKG4	O96008;K7EJ57	Mitochondrial import receptor subunit TOM40 homolog	TOMM40	37.893
22.3893	22.8529	22.9564	22.0565	22.5456	23.15	22.6745	22.9218	4	18.9	25.2413	7			0.472253	0.25924	0.346334	Q96BY9;E5RHW0;H0YAZ1;H0YBH7;E5RFJ9;H0YAN9	Q96BY9;E5RHW0;H0YAZ1;H0YBH7;E5RFJ9;H0YAN9	Store-operated calcium entry-associated regulatory factor	SARAF	36.975
21.3541	22.1849	23.5307	22.5091	23.6031	24.0284	23.032	22.5833	4	32.4	27.4939	11			0.83308	0.916998	0.872846	H0YN88;A0A075B716;P08708;H0YN73	H0YN88;A0A075B716;P08708	40S ribosomal protein S17	RPS17	15.919
23.3042	22.8841	21.0222	23.4586	23.2501	23.5814	23.2523	23.3657	4	6.5	26.5536	18			0.574836	0.695095	0.651436	Q68E01;A0A096LNW8	Q68E01;A0A096LNW8	Integrator complex subunit 3	INTS3	118.07
21.3114	23.3625	23.6043	23.3777	23.4774	23.0741	24.0202	22.0553	6	6	26.6337	14			0.134988	0.242785	0.205956	H7C3T2;Q2TAZ0	H7C3T2;Q2TAZ0	Autophagy-related protein 2 homolog A	ATG2A	190.64
21.3143	22.6951	22.5768	21.5634	21.5192	22.1771	23.19	22.0686	5	4.4	25.0447	11			0.156379	0.201344	0.202596	Q460N5;H7C5R8;H7C4Y3	Q460N5;H7C5R8	Poly [ADP-ribose] polymerase 14	PARP14	202.8
21.9416	25.0619	25.0326	25.5918	25.3949	25.45	25.1381	25.3894	7	38.9	28.6003	30			0.515785	0.936124	0.701373	Q9Y2Q3;E9PFN5;C9JNT3	Q9Y2Q3;E9PFN5;C9JNT3	Glutathione S-transferase kappa 1	GSTK1	25.497
22.4765	24.0236	23.7848	24.1103	24.132	24.025	23.1895	23.2096	7	5.9	27.036	32			0.0302006	0.0402341	0.042008	A0A0A0MRJ0;Q5VT25;H0Y5V1;H0Y7V8;A0A0A0MRJ1;H0Y6V3;A0A0U1RRC3;H0Y6R0;M0R333;H0YLY0;Q09013	A0A0A0MRJ0;Q5VT25;H0Y5V1;H0Y7V8;A0A0A0MRJ1	Non-specific serine/threonine protein kinase;Serine/threonine-protein kinase MRCK alpha	CDC42BPA	193.63
22.2252	22.319	22.6017	22.6642	22.6299	22.5213	23.4044	22.0492	7	4.3	25.8933	19			0.273251	0.198704	0.248221	A0A087X2H1;Q9ULT8;H0YJP0;G3V4V5;H0YJD4	A0A087X2H1;Q9ULT8;H0YJP0;G3V4V5	E3 ubiquitin-protein ligase HECTD1	HECTD1	289.63
21.7629	22.5914	22.2624	21.3515	22.8832	22.3803	21.6843	22.7806	3	4.4	25.3053	7			0.527228	0.440044	0.497021	E9PR38;H0YEH2;Q14671;E9PM68;E9PL65;E9PMX1	E9PR38;H0YEH2;Q14671	Pumilio homolog 1	PUM1	100.5
22.0439	21.7693	22.4605	21.7258	22.1595	23.3615	21.5107	24.3312	3	3.8	26.1752	11			0.613828	0.840806	0.731203	Q13523;H0YDJ3	Q13523;H0YDJ3	Serine/threonine-protein kinase PRP4 homolog	PRPF4B	116.99
21.7089	22.0065	22.8934	21.5321	23.4085	23.1357	23.1558	23.2724	4	10.5	26.0075	7			2.10347	1.20785	1.49338	Q9BVG9;A0A0J9YWQ2	Q9BVG9;A0A0J9YWQ2	Phosphatidylserine synthase 2	PTDSS2	56.252
24.2449	23.3798	22.0975	21.641	23.422	23.2536	23.1827	24.2608	3	11.4	26.7984	11			0.485843	0.688984	0.601587	Q86W42	Q86W42	THO complex subunit 6 homolog	THOC6	37.535
22.8184	23.1865	22.9743	23.0886	22.4051	22.8266	21.6728	21.8205	3	8.2	25.854	7			1.62035	-0.835703	-1.07355	Q8IUF8;H0Y9L8	Q8IUF8	Bifunctional lysine-specific demethylase and histidyl-hydroxylase MINA	MINA	52.8
21.4264	22.0505	22.0561	21.2117	22.9077	22.7364	22.8802	23.2051	3	5.1	25.4019	5			2.71317	1.2462	1.68917	A0A096LPH6;Q14966	A0A096LPH6;Q14966	Zinc finger protein 638	ZNF638	104.05
22.8112	22.1323	22.2187	23.738	22.9215	23.5084	22.9987	23.8207	3	11.5	26.4108	5			0.660974	0.587271	0.633431	E5RHW4;O94905;E5RJ09;B0QZ43	E5RHW4;O94905	Erlin-2	ERLIN2	37.725
22.4063	22.7628	22.8032	24.754	24.7908	24.9462	21.8537	25.0879	3	11.4	27.7976	10			0.477093	0.988077	0.686484	P53582;H0Y955;H0Y903	P53582;H0Y955	Methionine aminopeptidase 1	METAP1	43.215
22.8053	23.4282	20.9187	22.9101	24.5661	24.0543	23.7909	23.2716	3	10.4	26.5111	8			1.2115	1.40517	1.2636	E7EM50;D6RFE8;E7EWV1;Q5H8A4;D6R9J9	E7EM50;D6RFE8;E7EWV1;Q5H8A4;D6R9J9	GPI ethanolamine phosphate transferase 2	PIGG	51.236
22.6846	22.7013	22.6426	22.3661	22.8566	22.4282	22.9251	23.7503	3	7.5	25.8881	3			0.653947	0.391392	0.497209	Q7Z3B4	Q7Z3B4	Nucleoporin p54	NUP54	55.435
23.2336	22.9772	22.371	22.249	23.7267	24.015	24.1871	24.061	3	19.5	26.5999	9			2.62669	1.28978	1.706	O15126;A0A087WXB0;A0A087WTX8;A0A087WZA6;A0A087WU14	O15126;A0A087WXB0	Secretory carrier-associated membrane protein 1	SCAMP1	37.92
21.952	22.0998	22.4285	22.3309	22.5252	22.072	22.655	22.9654	3	5.7	25.4724	19			0.81624	0.351625	0.491954	Q9UPN7	Q9UPN7	Serine/threonine-protein phosphatase 6 regulatory subunit 1	PPP6R1	96.723
23.0276	23.4157	23.174	22.9055	23.1129	23.5029	22.4501	23.2007	4	13.3	26.44	11			0.0944883	-0.0640407	-0.0856735	P82675	P82675	28S ribosomal protein S5, mitochondrial	MRPS5	48.006
23.3158	20.6579	22.6104	22.8714	23.19	23.2281	23.272	23.4781	4	9.7	25.538	4			0.777115	0.928146	0.851109	A0A1C7CYX0;Q2M3D2	A0A1C7CYX0;Q2M3D2	Exocyst complex component 3-like protein 2	EXOC3L2	87.479
22.3895	21.6767	22.5012	22.7531	23.4054	23.4232	21.5627	23.2883	3	22.9	25.8786	9			0.537066	0.58976	0.584677	Q9UKM9;Q5QPM0;Q5QPM1;Q5QPL9;Q5QPM2	Q9UKM9;Q5QPM0;Q5QPM1;Q5QPL9	RNA-binding protein Raly	RALY	32.463
23.0036	22.4239	23.8557	23.1082	23.2575	23.2664	23.7092	23.8188	3	6.2	26.6919	13			0.596397	0.415167	0.501056	Q9Y5A9;S4R3J8;S4R3V3;A0A024R7W5;A0A087X0Q1;A0A087WY31;Q7Z739	Q9Y5A9	YTH domain-containing family protein 2	YTHDF2	62.333
22.5842	24.4248	24.4271	23.3488	23.372	24.6926	22.7152	23.8022	3	8.3	27.1878	13			0.0284614	-0.0507226	-0.0456441	P58004;P58005	P58004	Sestrin-2	SESN2	54.493
21.9453	23.1493	24.2365	23.542	23.1739	23.7572	22.8195	23.6258	4	10.6	26.7869	12			0.0867745	0.125854	0.122655	Q9H7D7;H0Y9R3	Q9H7D7;H0Y9R3	WD repeat-containing protein 26	WDR26	72.123
22.239	21.2767	23.1401	22.858	23.6768	23.4651	23.6154	23.5526	4	8.6	26.368	13			1.55672	1.19902	1.31024	Q9Y3Z3	Q9Y3Z3	Deoxynucleoside triphosphate triphosphohydrolase SAMHD1	SAMHD1	72.2
23.417	22.973	22.3403	22.2935	22.9714	23.709	22.9834	23.5057	4	5.2	26.3521	10			0.816141	0.536416	0.648122	P23634;P20020;E7ERY9;Q16720;H0Y7S3;Q01814	P23634;P20020;E7ERY9;Q16720	Plasma membrane calcium-transporting ATPase 4;Plasma membrane calcium-transporting ATPase 1;Calcium-transporting ATPase;Plasma membrane calcium-transporting ATPase 3	ATP2B4;ATP2B1;ATP2B3	137.92
20.7558	23.4775	22.5248	23.1315	23.0927	23.3273	22.4595	23.3986	4	5.5	25.9602	9			0.411179	0.597148	0.52303	Q8IY18	Q8IY18	Structural maintenance of chromosomes protein 5	SMC5	128.81
22.1774	22.4686	22.8923	21.0852	22.6515	22.16	22.5165	22.1322	5	6.3	25.6832	11			0.203618	0.209155	0.230593	A6NHB5;Q14202;A6NHN7	A6NHB5;Q14202;A6NHN7	Zinc finger MYM-type protein 3	ZMYM3	152.6
21.9366	21.4914	23.8895	21.9039	23.4655	23.1978	23.6022	23.428	3	6.4	25.9005	9			1.06692	1.11803	1.07069	P33897	P33897	ATP-binding cassette sub-family D member 1	ABCD1	82.936
23.6431	21.627	22.8924	21.9489	23.0536	21.298	23.1668	22.6872	3	19.1	26.0789	7			0.0126297	0.0235491	0.0208631	M0R080;P25685;M0QYT3;M0QXK0;M0R128;A0A1B0GX60;M0R1D6;M0QZD0	M0R080;P25685;M0QYT3;M0QXK0	DnaJ homolog subfamily B member 1	DNAJB1	20.497
23.0138	22.6829	22.4017	21.4545	23.0385	23.3716	22.8892	23.0138	3	8	26.1559	11			1.014	0.69005	0.810951	F5H1S9;G8JLB3;Q9Y606;F5GY32	F5H1S9;G8JLB3;Q9Y606	tRNA pseudouridine synthase;tRNA pseudouridine synthase A, mitochondrial	PUS1	41.729
22.8839	22.6132	22.0273	22.097	22.6037	22.1782	22.3847	22.3219	3	5	25.2518	9			0.0520044	-0.0332189	-0.0458594	Q8ND04	Q8ND04	Protein SMG8	SMG8	109.68
21.9608	21.9597	23.1263	21.9526	23.5814	23.2636	23.7258	23.2777	4	13.7	26.5336	12			2.07946	1.21228	1.4897	A0A087WTA5;E7ERK9;Q9UI10;H7C2L8;A0A087WW69;F8W8L6	A0A087WTA5;E7ERK9;Q9UI10;H7C2L8;A0A087WW69;F8W8L6	Translation initiation factor eIF-2B subunit delta	EIF2B4	57.495
26.6881	27.6196	21.3221	27.1475	27.3778	28.1296	27.6507	26.1745	3	28.3	30.5721	20			0.488667	1.63883	0.808271	P61981	P61981	14-3-3 protein gamma;14-3-3 protein gamma, N-terminally processed	YWHAG	28.302
23.6788	21.2821	21.8946	21.8983	23.2248	24.3454	24.5369	24.0575	3	5.5	26.641	4			1.6891	1.85267	1.6952	P05556;C9JPK5;E7ERX5;Q5T3E6;E9PLR6;E7EUI6;E7EQW5	P05556	Integrin beta-1	ITGB1	88.414
21.5147	23.3281	22.6032	23.0732	23.7628	23.5086	23.4576	23.8253	3	10	26.6738	15			1.30498	1.00877	1.10716	O15479	O15479	Melanoma-associated antigen B2	MAGEB2	35.277
22.4868	22.6874	23.545	21.4263	22.5376	22.5567	22.477	23.1632	4	10.1	26.026	9			0.118175	0.147262	0.152742	Q13769;H7C441;C9JXG5;H7C072;F8WCP5	Q13769	THO complex subunit 5 homolog	THOC5	78.507
22.6669	22.5441	23.1477	21.9888	24.1001	23.6945	21.7009	23.9036	5	9.3	26.3017	12			0.595313	0.762889	0.69059	H7BXK9;Q9NP58	H7BXK9;Q9NP58	ATP-binding cassette sub-family B member 6, mitochondrial	ABCB6	77.434
20.995	21.1558	22.1898	21.9301	21.6672	22.6768	22.8528	23.0799	3	19.3	25.1677	13			1.24267	1.00148	1.08096	F8WBF9;Q5TH30;Q9UGV2	F8WBF9;Q5TH30;Q9UGV2	Protein NDRG3	NDRG3	30.723
21.6922	22.5059	22.7523	22.4886	21.75	24.0031	23.4283	24.6787	3	10.4	26.6321	7			0.827615	1.10525	0.946866	P43358;P43363;C9JZJ5;C9J9C2;C9JK50;C9JIR1;Q3SYA6;A0A0A0MSA3;P43355;P43362;P43361;A2A368;A8MXT2;Q96M61	P43358;P43363	Melanoma-associated antigen 4;Melanoma-associated antigen 10	MAGEA4;MAGEA10	34.899
23.5512	21.4573	22.2593	22.2544	22.0066	25.5694	24.4919	24.084	3	9.7	27.61	10			0.986645	1.65745	1.21621	P17174	P17174	Aspartate aminotransferase, cytoplasmic	GOT1	46.247
21.5183	21.9317	22.2022	22.1038	23.6076	22.671	21.9117	22.7605	4	13.9	26.0945	11			1.10107	0.798697	0.909358	A0A087X1U9;O14976;H0Y8H5;D6RF16;D6RAQ7;D6RE78;D6RAW3	A0A087X1U9;O14976;H0Y8H5	Cyclin-G-associated kinase	GAK	43.961
23.9384	23.6338	22.3493	21.8536	23.956	22.8166	24.1736	23.506	3	5.9	26.9147	10			0.530156	0.669275	0.617726	A8MT40;Q8NCN5;H3BQG3	A8MT40;Q8NCN5	Pyruvate dehydrogenase phosphatase regulatory subunit, mitochondrial	PDPR	88.569
23.846	23.0147	24.693	23.9919	24.7732	23.9986	23.4098	23.3916	3	11.9	27.3405	17			0.00486132	0.0068903	0.00707561	F8W8R3;A0A087WWF6;P49005;C9JLE1;H7C1B3;C9IZD2;C9J8Z7;C9JHC7	F8W8R3;A0A087WWF6;P49005;C9JLE1	DNA polymerase delta subunit 2	POLD2	49.612
21.7418	22.3048	23.1184	22.9346	23.0057	23.0675	22.5037	22.6364	3	42.2	26.0904	22			0.348992	0.278406	0.330334	J3QSY4;D6RC52;D6RCB9;Q9NX24	J3QSY4;D6RC52;D6RCB9;Q9NX24	H/ACA ribonucleoprotein complex subunit 2	NHP2	10.071
21.3757	22.1988	22.3368	24.42	23.9298	24.3401	23.083	23.7956	3	18.3	26.9067	12			0.8676	1.20434	1.0045	P49755;G3V2K7	P49755;G3V2K7	Transmembrane emp24 domain-containing protein 10	TMED10	24.976
22.1227	22.7024	22.2543	21.9504	23.785	23.5091	23.1698	24.2731	3	5.9	26.21	9			2.62654	1.42675	1.82161	A0A140T9T7;Q03518	A0A140T9T7;Q03518	Antigen peptide transporter 1	TAP1	87.175
23.2405	22.3821	22.6138	22.115	22.5231	22.1776	22.2437	22.724	3	5.3	24.9387	7			0.257414	-0.170732	-0.221258	O14867;C9JMP6;C9IYR0	O14867	Transcription regulator protein BACH1	BACH1	81.957
21.2542	21.9063	21.1978	21.8895	22.5495	22.529	22.7309	22.5976	3	23.4	25.1415	5			2.70019	1.03976	1.48633	Q8N5N7	Q8N5N7	39S ribosomal protein L50, mitochondrial	MRPL50	18.325
22.6594	22.4773	22.4997	22.5141	23.5069	23.3038	23.0345	23.1526	3	4.9	25.8402	8			3.18897	0.711822	1.16688	Q9H307;G3V5F0;G3V579	Q9H307	Pinin	PNN	81.613
21.6499	22.732	21.6395	22.9351	22.9498	22.4362	23.1821	23.2808	4	9.6	25.5286	5			0.935626	0.723095	0.809024	Q9H0J9;G5E9U9;H7C4Z9	Q9H0J9;G5E9U9	Poly [ADP-ribose] polymerase 12	PARP12	79.063
22.5464	21.6868	22.8582	21.6791	23.1505	22.4715	23.5979	22.4593	4	9	25.642	11			0.89886	0.727198	0.799419	Q9H2C0	Q9H2C0	Gigaxonin	GAN	67.638
24.1089	24.3456	24.8934	24.7261	25.7755	24.8771	25.4279	25.2911	3	34.3	28.4029	14			1.73181	0.8244	1.08842	Q9NZ45	Q9NZ45	CDGSH iron-sulfur domain-containing protein 1	CISD1	12.199
22.9744	24.5652	23.6292	22.7833	24.6115	25.186	24.309	24.7699	3	32.6	27.6851	15			1.49901	1.23106	1.30729	A0A0C4DGL3;H0YNW5;H0YKC5;P33316;H0YMP1;H0YMM5;H0YNJ9;H0YKI0	A0A0C4DGL3;H0YNW5;H0YKC5;P33316;H0YMP1;H0YMM5;H0YNJ9;H0YKI0	Deoxyuridine 5-triphosphate nucleotidohydrolase, mitochondrial	DUT	15.395
23.9873	24.172	24.1008	22.0936	24.2402	24.9706	24.8725	24.4838	3	12.7	27.7464	10			1.03135	1.05332	1.02472	P53701	P53701	Cytochrome c-type heme lyase	HCCS	30.601
22.5926	23.552	22.9999	22.4759	23.0093	22.9421	23.3321	22.9313	4	4.2	26.3156	15			0.229523	0.148613	0.195334	Q9Y2I1;C9J715	Q9Y2I1	Nischarin	NISCH	166.63
22.0269	22.7565	22.9359	24.0124	23.7896	23.9532	23.9055	23.8017	3	5.2	26.9207	17			1.18806	0.929554	1.01932	Q96PK6;A0A0A6YYI9;F8WDX3;A0A0A0MSL8;B8ZZ74	Q96PK6	RNA-binding protein 14	RBM14	69.491
23.9701	23.0182	22.1151	23.6675	23.2435	23.5469	23.0448	23.5856	3	16.2	26.7137	16			0.143486	0.162462	0.174668	P61964;V9GYQ5;V9GZ59	P61964	WD repeat-containing protein 5	WDR5	36.588
22.8793	24.498	24.9551	24.4677	24.8821	24.4528	24.3962	24.3176	3	6	27.8893	12			0.273705	0.312137	0.321326	O94925;H7BZD1	O94925	Glutaminase kidney isoform, mitochondrial	GLS	73.46
22.8231	22.117	22.4616	20.9905	22.5189	22.9397	22.1582	22.0815	3	6.5	25.7603	14			0.311355	0.326521	0.346506	P49643	P49643	DNA primase large subunit	PRIM2	58.805
21.7447	23.0718	23.3994	23.5072	23.3758	23.1778	23.3637	23.2738	3	4.1	26.5491	15			0.393925	0.367033	0.403926	Q9UJX5	Q9UJX5	Anaphase-promoting complex subunit 4	ANAPC4	92.115
22.8652	22.7632	22.6471	23.5445	23.5452	23.2954	23.3067	23.3448	4	8.2	26.372	21			1.02993	0.418048	0.588992	Q15459;H7C1L2	Q15459	Splicing factor 3A subunit 1	SF3A1	88.885
21.6741	23.8141	23.7579	24.5202	23.8562	24.1515	23.2315	23.5868	3	7.5	27.1444	13			0.157806	0.26496	0.231479	Q9Y2P8;Q5VZU3;Q5VZU2	Q9Y2P8;Q5VZU3	RNA 3-terminal phosphate cyclase-like protein	RCL1	40.842
21.3902	21.5542	22.6711	21.4307	21.5449	21.9938	21.7684	22.2101	4	6.3	25.0235	16			0.131417	0.117727	0.140625	Q15398	Q15398	Disks large-associated protein 5	DLGAP5	95.114
23.1065	22.7298	21.8732	22.0632	24.049	24.4844	25.1392	23.3335	4	21.4	26.9618	6			2.04734	1.80837	1.85307	P49675;H0YB94	P49675;H0YB94	Steroidogenic acute regulatory protein, mitochondrial	STAR	31.914
22.735	21.9119	21.8158	22.5579	23.1931	22.7653	23.4841	23.0983	4	5	25.7969	12			1.74179	0.880065	1.13813	Q9BWH6;H3BRE8;H3BPY8;H3BPM3	Q9BWH6;H3BRE8	RNA polymerase II-associated protein 1	RPAP1	152.75
23.0999	23.8066	21.638	22.3521	23.0283	22.9118	23.1988	23.154	4	13.1	26.3275	11			0.311493	0.349073	0.35887	M0QZ10;M0QXF9;O15382;B3KSI3;M0R2K7	M0QZ10;M0QXF9;O15382;B3KSI3	Branched-chain-amino-acid aminotransferase;Branched-chain-amino-acid aminotransferase, mitochondrial	BCAT2	45.408
22.8848	24.6374	24.8166	24.894	24.4212	24.6007	25.0646	21.7318	5	17	27.9038	14			0.151543	-0.353625	-0.254076	O43242	O43242	26S proteasome non-ATPase regulatory subunit 3	PSMD3	60.977
20.8202	24.4686	24.9061	25.6074	24.6981	24.1661	24.6784	23.8017	4	20.3	27.9175	9			0.133133	0.385459	0.242247	P00387;B1AHF3	P00387;B1AHF3	NADH-cytochrome b5 reductase 3;NADH-cytochrome b5 reductase 3 membrane-bound form;NADH-cytochrome b5 reductase 3 soluble form	CYB5R3	34.234
24.0711	25.3632	21.8375	23.4217	25.2939	25.4397	24.7479	25.2757	4	8	28.1815	13			1.04934	1.51591	1.21415	Q9UHB9	Q9UHB9	Signal recognition particle subunit SRP68	SRP68	70.729
23.8543	24.3264	22.1122	22.5854	24.2116	24.258	23.8917	23.7998	5	7.1	27.1646	10			0.757534	0.820688	0.794223	K7EIG7;O94832;J3QRN6;J3KRL0	K7EIG7;O94832;J3QRN6	Unconventional myosin-Id	MYO1D	106.01
21.3231	25.1626	25.8889	22.3077	24.2834	24.2681	25.9906	24.4256	4	20.1	28.2832	18			0.400563	1.07135	0.639049	Q92947;K7ES74;K7ESA6;K7EKH1;K7EKT3;K7ERX1	Q92947;K7ES74	Glutaryl-CoA dehydrogenase, mitochondrial	GCDH	48.127
22.6716	21.4294	24.04	22.294	24.1438	24.2706	24.2182	24.61	6	10.5	27.5601	9			1.66291	1.70192	1.61623	J3QK89;Q8IWX8	J3QK89;Q8IWX8	Calcium homeostasis endoplasmic reticulum protein	CHERP	104.93
22.3747	22.9869	23.2853	22.8481	23.0564	23.5093	22.8816	22.8775	4	1.4	26.3256	12			0.374194	0.207439	0.279936	A0A0A0MRF6;Q99996;H7BYL6;A0A0A0MRE9;A0A087WX84	A0A0A0MRF6;Q99996;H7BYL6;A0A0A0MRE9	A-kinase anchor protein 9	AKAP9	453.49
22.2153	24.3886	24.7853	25.8787	26.6192	26.2823	26.5099	25.9304	4	23.7	29.2713	23			1.37779	2.01849	1.57318	Q5T8U5;O15260;B7Z1G8	Q5T8U5;O15260	Surfeit locus protein 4	SURF4	21.127
24.9944	24.0423	25.43	22.4978	24.8002	24.4632	25.019	24.7849	8	8.4	27.8848	25			0.341396	0.525731	0.453479	Q8IY37;F5H3Y4	Q8IY37;F5H3Y4	Probable ATP-dependent RNA helicase DHX37	DHX37	129.54
20.9986	24.3213	25.1905	24.9004	25.2421	24.8547	24.3138	24.5559	4	23.8	28.0577	18			0.394354	0.888907	0.597047	P30084	P30084	Enoyl-CoA hydratase, mitochondrial	ECHS1	31.387
22.7546	23.1724	22.3053	22.3689	24.1107	24.0851	23.945	23.6532	5	9.2	26.7235	14			2.91521	1.29821	1.78773	O14672;C9J9B4	O14672	Disintegrin and metalloproteinase domain-containing protein 10	ADAM10	84.141
20.1317	22.4831	23.4105	24.5194	24.3971	24.3246	23.8246	24.1875	5	23.1	27.4042	19			0.819891	1.54726	1.07339	Q5LJA5;Q5LJA9;Q9Y5K5;H0Y4E0;H0Y6Y4;Q5LJB0;H0Y4K0;H0Y636	Q5LJA5;Q5LJA9;Q9Y5K5;H0Y4E0;H0Y6Y4;Q5LJB0	Ubiquitin carboxyl-terminal hydrolase;Ubiquitin carboxyl-terminal hydrolase isozyme L5	UCHL5	40.423
22.9785	22.6711	22.3524	22.146	22.6688	23.3189	22.5416	23.5998	5	12.1	26.0012	11			0.782823	0.49526	0.609035	O60749;H0YK42;Q13596	O60749	Sorting nexin-2	SNX2	58.47
23.8218	22.0127	24.6036	24.2859	24.66	24.3205	24.2184	23.865	8	17.4	27.5508	23			0.43373	0.584958	0.531057	Q9BTE3	Q9BTE3	Mini-chromosome maintenance complex-binding protein	MCMBP	72.979
23.1637	21.4161	22.7939	22.4486	22.5173	23.0193	22.9734	23.3359	4	3.1	26.0779	13			0.575898	0.505909	0.554684	E7EVG2;Q86U86;H0Y5B5;C9JPI5	E7EVG2;Q86U86;H0Y5B5	Protein polybromo-1	PBRM1	168.45
21.0531	21.88	21.4724	23.2214	23.6898	23.3059	22.7675	23.4545	4	11.2	26.5923	16			1.47617	1.3977	1.3856	Q13356;C9JDF0	Q13356	Peptidyl-prolyl cis-trans isomerase-like 2	PPIL2	58.823
22.3924	21.7224	22.791	23.3658	23.8203	24.2145	24.0758	24.2031	5	5.1	26.8976	13			2.25798	1.51053	1.76178	O95486;H0Y9J6	O95486	Protein transport protein Sec24A	SEC24A	119.75
22.5992	22.5355	22.4645	21.4872	22.6724	22.5846	22.8681	23.3871	4	6.9	25.5806	11			0.976587	0.606433	0.740949	Q92667;I3L3K1;I3L364;I3L0K6;I3L2A2;I3L2N7;I3L0W0	Q92667;I3L3K1;I3L364;I3L0K6;I3L2A2;I3L2N7	A-kinase anchor protein 1, mitochondrial	AKAP1	97.34
21.1017	22.0148	22.8605	21.7405	22.2783	23.4985	23.4495	22.4409	8	7.2	26.6095	13			1.04962	0.987413	0.999952	O60293;G3V1X1	O60293	Zinc finger C3H1 domain-containing protein	ZFC3H1	226.35
22.2971	22.8717	23.57	23.6609	23.2188	23.5547	23.0862	23.3034	6	11.8	26.5442	17			0.229257	0.190863	0.228498	Q5T2B5;A0A0A0MTN0;Q13617	Q5T2B5;A0A0A0MTN0;Q13617	Cullin-2	CUL2	82.358
22.7816	21.7363	22.2431	21.4592	24.2077	23.4666	23.0532	22.7037	4	6.3	26.0653	8			1.61525	1.30273	1.39273	Q9Y4R8;H3BRS3	Q9Y4R8;H3BRS3	Telomere length regulation protein TEL2 homolog	TELO2	91.746
22.0661	21.6334	22.8015	22.6321	23.4219	24.1445	23.388	24.338	5	11	26.9711	14			2.26711	1.53984	1.78493	Q9ULW0	Q9ULW0	Targeting protein for Xklp2	TPX2	85.652
23.3305	22.7607	23.8815	22.8149	23.3391	23.1419	23.0834	22.6203	4	15.5	26.3303	21			0.196286	-0.150729	-0.187749	P14635;E9PC90;H0YA62;D6RHI0;H0YMP3	P14635;E9PC90;H0YA62	G2/mitotic-specific cyclin-B1	CCNB1	48.337
22.2899	22.0007	21.3718	24.4824	24.608	24.7392	24.2508	24.706	4	39.9	27.6066	20			1.60564	2.03981	1.72043	M0R192;P30043;M0QZL1	M0R192;P30043;M0QZL1	Flavin reductase (NADPH)	BLVRB	17.16
22.6235	22.0119	22.4536	23.584	21.8242	22.7741	23.5924	22.997	4	7.7	26.0965	17			0.0950063	0.128661	0.129341	Q99797	Q99797	Mitochondrial intermediate peptidase	MIPEP	80.64
21.5889	24.7566	22.968	24.2377	23.9471	24.1007	22.9685	24.1127	4	20.8	27.1382	19			0.206375	0.394449	0.31337	O95861;A6NF51;F8VZG4;F8W1J0;F8VRY7;F8VVW8	O95861;A6NF51;F8VZG4;F8W1J0	3(2),5-bisphosphate nucleotidase 1	BPNT1	33.392
22.3738	24.5302	23.8388	24.9113	24.6684	24.4786	23.9751	23.659	4	14.7	27.6572	13			0.181901	0.281793	0.255015	S4R369;Q9BZE1;H0Y4J2;A6NHR2	S4R369;Q9BZE1	39S ribosomal protein L37, mitochondrial	MRPL37	54.952
24.7413	22.9875	24.9141	25.4381	24.701	25.3642	25.0495	25.2756	7	13.4	28.3927	17			0.47366	0.577334	0.548734	Q9NVP1;H7C452	Q9NVP1	ATP-dependent RNA helicase DDX18	DDX18	75.406
23.6054	24.0781	23.6745	24.7803	24.8004	24.2206	23.3472	23.5109	7	9	27.293	24			0.0529208	-0.0647893	-0.0696361	P58107;A0A075B730;A0A087X1U6	P58107;A0A075B730;A0A087X1U6	Epiplakin	EPPK1	555.61
22.9836	24.0694	23.3166	22.8084	24.2679	23.3404	23.6309	22.8494	5	19.1	26.7818	16			0.224654	0.227663	0.251012	P43686	P43686	26S protease regulatory subunit 6B	PSMC4	47.366
24.7506	22.7231	23.4928	24.061	23.4662	23.6267	24.2666	24.6228	5	24.4	27.3309	21			0.183608	0.23874	0.236751	P31689	P31689	DnaJ homolog subfamily A member 1	DNAJA1	44.868
26.0282	26.0989	22.8066	20.9661	24.7648	25.9169	25.4938	25.4885	5	7.7	28.8577	14			0.515469	1.44103	0.80705	Q96P70	Q96P70	Importin-9	IPO9	115.96
21.9869	24.9772	25.6453	25.5309	26.1288	26.4583	26.0187	26.471	4	22.4	29.2618	20			1.03085	1.73411	1.26626	A0A087WUX8;A0A087WYF7;Q6UXV4	A0A087WUX8;A0A087WYF7;Q6UXV4	MICOS complex subunit MIC27	APOOL	28.761
22.3143	22.9401	23.1054	23.0991	23.5265	23.5901	23.7933	23.8862	4	3.4	26.795	15			2.17631	0.834308	1.18244	A6NNN6;E7ETA6;Q15154;H0YBA1	A6NNN6;E7ETA6;Q15154	Pericentriolar material 1 protein	PCM1	210.13
21.7098	24.5362	24.4201	24.1972	23.726	24.4404	24.2479	24.4394	4	19.9	27.5921	16			0.301178	0.497615	0.417043	P30040;F8VY02;F8W1G0	P30040;F8VY02	Endoplasmic reticulum resident protein 29	ERP29	28.993
24.5011	22.8576	22.9904	24.4172	24.4179	24.5581	24.3049	24.3118	5	19.6	27.6269	18			0.779864	0.706619	0.745178	C9J2Z4;A0A024R571;Q9H4M9;C9JC03;C9JDQ8	C9J2Z4;A0A024R571;Q9H4M9;C9JC03	EH domain-containing protein 1	EHD1	34.721
25.0863	25.2165	21.0651	23.9494	24.642	25.0841	25.7611	24.7128	5	42	28.3006	13			0.57342	1.22068	0.814993	Q9ULC4	Q9ULC4	Malignant T-cell-amplified sequence 1	MCTS1	20.555
22.3797	26.1837	26.0594	25.0175	26.0654	26.3512	26.1156	25.812	5	29.7	29.2741	16			0.629829	1.17598	0.846063	P52907	P52907	F-actin-capping protein subunit alpha-1	CAPZA1	32.922
21.6406	24.2549	24.1079	24.3803	24.6299	24.5541	24.6147	24.571	6	10.1	27.7377	23			0.748016	0.996486	0.863218	E9PPJ0;Q13435;E9PJ04;H0YCG1;E9PJT3;E9PIL8;H0YEX5	E9PPJ0;Q13435;E9PJ04;H0YCG1	Splicing factor 3B subunit 2	SF3B2	98.169
23.4303	22.8248	23.2475	21.8292	24.2048	24.6093	24.6929	23.6555	7	18.8	27.0888	26			1.83677	1.45765	1.56873	Q9UKV5;H3BRK9;R4GNG2	Q9UKV5	E3 ubiquitin-protein ligase AMFR	AMFR	72.995
22.8724	23.8221	24.3485	23.6715	24.5214	23.5788	24.5126	23.2597	7	9.1	27.292	15			0.268125	0.289503	0.306377	Q99707;B1ANE3	Q99707	Methionine synthase	MTR	140.53
22.5527	24.0152	23.8372	23.9718	24.369	24.4522	24.0667	23.5496	11	7.3	27.3498	22			0.602068	0.515117	0.569484	Q8N201	Q8N201	Integrator complex subunit 1	INTS1	244.29
22.8302	21.3714	23.0772	23.4297	23.3178	22.8923	22.8441	23.0334	6	19.7	26.3477	21			0.313308	0.34481	0.357444	G3V0G3;Q9NY93;F8WDT8;H7C3E9;F8WEI3	G3V0G3;Q9NY93;F8WDT8;H7C3E9	Probable ATP-dependent RNA helicase DDX56	DDX56	41.653
22.3441	23.6041	23.5939	23.3894	23.5923	23.4696	23.7443	23.4117	5	8	27.0117	15			0.470488	0.321587	0.39739	Q08945;A0A0U1RRK2	Q08945	FACT complex subunit SSRP1	SSRP1	81.074
21.9492	24.1465	23.5685	24.271	24.621	24.421	24.0881	24.4512	6	7.8	27.5195	16			0.836509	0.911552	0.871933	E5KLK1;E5KLJ6;E5KLJ9;E5KLJ5;O60313;H7C3G2;H7C141	E5KLK1;E5KLJ6;E5KLJ9;E5KLJ5;O60313	Dynamin-like 120 kDa protein, mitochondrial;Dynamin-like 120 kDa protein, form S1	OPA1	111.82
21.8021	22.5982	21.3868	22.996	23.2773	23.7036	24.0341	24.9109	5	2.3	26.6653	7			1.91349	1.78566	1.77804	O94915;F2Z2S2;H0Y9X0;D6RJI4	O94915;F2Z2S2	Protein furry homolog-like	FRYL	339.59
23.075	24.1104	23.546	22.4403	23.3403	23.2694	23.4144	23.0202	5	13.7	26.5545	19			0.0300367	-0.0318723	-0.0368657	Q9BW19	Q9BW19	Kinesin-like protein KIFC1	KIFC1	73.747
22.789	22.1267	21.8455	21.8088	22.7798	22.884	22.404	23.0392	6	3.8	25.4707	20			1.27411	0.63425	0.830037	Q92508	Q92508	Piezo-type mechanosensitive ion channel component 1	PIEZO1	286.79
22.5182	24.7434	21.6991	24.1182	24.4372	24.8296	24.9075	24.8349	5	10.5	27.7681	13			1.08613	1.48257	1.22466	P07948;E5RJ37	P07948	Tyrosine-protein kinase Lyn	LYN	58.573
21.3765	25.0078	24.431	21.6212	24.3556	25.5361	24.7781	24.8738	5	5.5	27.983	15			0.933246	1.77681	1.20895	F8W7R3;Q9NVI1;H3BP78;H3BT54;H3BMG4;H3BS60;H3BN35;H3BQE2	F8W7R3;Q9NVI1;H3BP78	Fanconi anemia group I protein	FANCI	123.24
22.2187	24.4937	24.1719	22.1109	24.3245	23.7334	23.6421	24.3155	9	3.4	27.3108	17			0.532511	0.75508	0.653262	Q709C8	Q709C8	Vacuolar protein sorting-associated protein 13C	VPS13C	422.39
23.6158	23.9718	23.0157	22.5066	24.1292	23.6399	23.9202	23.46	7	11.5	26.9036	19			0.694013	0.509879	0.595494	C9JZR2;O60716;H0YC95;E9PKY0;E9PRE2	C9JZR2;O60716	Catenin delta-1	CTNND1	104.85
23.7774	23.0729	24.8641	22.6581	22.3542	24.4423	24.948	25.168	7	10.6	27.4764	17			0.337627	0.635017	0.48705	P33176	P33176	Kinesin-1 heavy chain	KIF5B	109.68
22.6884	22.0567	22.2186	23.9304	24.2323	24.1234	23.9535	24.7261	7	4.1	27.07	21			1.82363	1.53533	1.60709	Q6KC79	Q6KC79	Nipped-B-like protein	NIPBL	316.05
21.8153	23.1835	23.0878	22.7946	23.9958	23.8722	24.4093	24.2345	10	4.8	27.065	26			2.24569	1.40769	1.68568	Q9P2D1	Q9P2D1	Chromodomain-helicase-DNA-binding protein 7	CHD7	335.92
21.9186	25.9349	24.8797	25.8674	21.8019	21.7845	22.5518	22.3561	3	0.1	27.731	3			1.40639	-2.5266	-1.72834	Q8WZ42;A0A0A0MRA3;A0A0A0MTS7	Q8WZ42;A0A0A0MRA3;A0A0A0MTS7	Titin	TTN	3816
22.9762	23.3153	23.2371	23.0426	22.4741	22.1988	22.8416	21.9868	3	1.2	25.4341	9			2.05486	-0.767519	-1.09459	P49454	P49454	Centromere protein F	CENPF	367.76
25.6928	25.1779	25.2278	25.0395	25.4658	25.1389	21.2319	22.5171	4	29.8	28.0936	10			0.816435	-1.69606	-1.10446	D6RAN4;P32969;E7ESE0;H0Y9V9;H0Y9R4	D6RAN4;P32969;E7ESE0;H0Y9V9;H0Y9R4	60S ribosomal protein L9	RPL9	20.775
25.3585	24.4397	23.8489	21.9062	25.27	25.2575	24.9975	20.9487	3	21	28.0716	5			0.0635479	0.230076	0.128836	A0A1B0GV06;A0A1B0GTP7;A0A1B0GUE3;A0A1B0GUG1;A0A1B0GUW4;E7EMM4;A0A1B0GW68;A0A1B0GUA4;A0A1B0GTM3;A0A1B0GTZ5;A0A1B0GUH5;Q13510	A0A1B0GV06;A0A1B0GTP7;A0A1B0GUE3;A0A1B0GUG1;A0A1B0GUW4;E7EMM4;A0A1B0GW68;A0A1B0GUA4;A0A1B0GTM3;A0A1B0GTZ5;A0A1B0GUH5;Q13510	Acid ceramidase;Acid ceramidase subunit alpha;Acid ceramidase subunit beta	ASAH1	22.837
23.6497	24.0974	24.7155	24.2348	23.9204	24.4418	24.2756	22.5803	6	21	27.331	15			0.331	-0.369794	-0.378924	Q96GM8	Q96GM8	Target of EGR1 protein 1	TOE1	56.547
23.4666	23.523	23.0902	23.3185	22.735	21.2131	22.8782	22.9159	3	4.3	26.1518	10			1.13824	-0.914024	-0.992873	Q86TI2;M0R0I1;M0R3C4;M0R2G6;M0QXI5;M0R2A8	Q86TI2	Dipeptidyl peptidase 9	DPP9	98.262
24.172	24.45	24.8221	22.8643	22.0361	22.1237	22.6214	22.5585	4	11.6	27.4692	7			2.07946	-1.74218	-1.83209	G5E9W3;Q9UKF6;C9JZH6	G5E9W3;Q9UKF6	Cleavage and polyadenylation specificity factor subunit 3	CPSF3	73.476
21.3446	21.7066	21.561	21.7535	22.3683	21.7517	21.7633	22.9949	3	5.8	24.2517	11			1.05081	0.628157	0.775691	Q9NPB8	Q9NPB8	Glycerophosphocholine phosphodiesterase GPCPD1	GPCPD1	76.034
22.7345	22.7831	22.0357	22.9552	21.1846	21.7617	22.1476	22.0555	3	3.5	25.4095	9			1.52176	-0.839767	-1.05358	J3KMZ7;Q9H0H0	J3KMZ7;Q9H0H0	Integrator complex subunit 2	INTS2	133.38
22.2495	22.5954	22.4001	22.4751	21.4202	23.1948	23.4956	22.1709	3	4.1	25.3164	8			0.107426	0.140335	0.142867	O14841;A0A087WY99	O14841	5-oxoprolinase	OPLAH	137.46
22.2197	21.2214	22.6546	21.7455	22.04	21.9136	22.5295	21.8705	3	5.9	24.3369	9			0.141419	0.128099	0.151855	G3XAH6;P51003;H0YJ00;G3V457;G3V3I9;A0A0C4DGK1;G3V2A0;Q9NRJ5;Q9BWT3	G3XAH6;P51003;H0YJ00	Poly(A) polymerase alpha	PAPOLA	80.625
21.7103	21.8158	21.6731	21.7177	22.8697	21.8327	22.101	21.4944	3	3.6	24.8516	10			0.54482	0.345217	0.434628	C9JQV3;Q8N1F8	C9JQV3;Q8N1F8	Serine/threonine-protein kinase 11-interacting protein	STK11IP	120.26
23.7666	24.7026	22.9708	24.0985	23.8344	24.0824	23.1645	22.0194	3	6.9	26.9898	10			0.470779	-0.609452	-0.56131	Q9Y223	Q9Y223	Bifunctional UDP-N-acetylglucosamine 2-epimerase/N-acetylmannosamine kinase;UDP-N-acetylglucosamine 2-epimerase (hydrolyzing);N-acetylmannosamine kinase	GNE	79.274
23.4799	23.1643	23.4979	22.0656	21.665	22.7678	21.8762	22.3561	3	16.8	26.129	12			1.10439	-0.885678	-0.964359	F8VXU5;Q9UBQ0	F8VXU5;Q9UBQ0	Vacuolar protein sorting-associated protein 29	VPS29	23.98
22.9646	23.9317	23.6213	23.3949	22.2266	22.7812	23.4436	22.1679	3	10.6	26.319	7			1.20606	-0.823322	-0.957305	P32929	P32929	Cystathionine gamma-lyase	CTH	44.508
24.8277	25.0085	24.8898	21.2008	24.6232	21.7956	24.9615	22.636	4	13.3	27.9454	12			0.151711	-0.477641	-0.280408	P25788;G3V4X5	P25788;G3V4X5	Proteasome subunit alpha type-3	PSMA3	28.433
22.9872	23.9151	23.4107	24.1514	21.4824	21.6782	22.6772	22.5298	4	5.4	26.5691	9			2.06758	-1.52416	-1.69934	Q93100;I3L3F2;H3BV13;I3NHZ9;H3BQ89	Q93100	Phosphorylase b kinase regulatory subunit beta	PHKB	124.88
24.1653	23.9869	24.4831	24.0388	22.4057	23.0284	21.6345	24.1038	9	19.1	26.5204	13			1.37829	-1.37543	-1.33096	P13674	P13674	Prolyl 4-hydroxylase subunit alpha-1	P4HA1	61.049
23.7927	23.1365	23.2112	23.6862	22.3995	22.4848	22.2186	22.3006	4	10.8	26.3666	15			3.1305	-1.10578	-1.63748	Q9BSC4;H7C1Z3	Q9BSC4	Nucleolar protein 10	NOL10	80.301
23.4296	25.7149	22.7896	22.6993	22.4134	22.4269	22.2468	22.336	3	11.1	27.312	9			0.941288	-1.30256	-1.0803	Q9BV20	Q9BV20	Methylthioribose-1-phosphate isomerase	MRI1	39.149
22.5622	23.1377	23.824	22.6194	22.6704	21.0747	22.5879	20.8189	6	4.5	26.1487	14			1.14829	-1.24782	-1.16643	Q6ZT12;H7C481;H0Y3K2	Q6ZT12	E3 ubiquitin-protein ligase UBR3	UBR3	212.43
23.4774	23.0448	22.9272	21.9219	21.1063	21.647	21.7775	22.7368	3	5.1	26.4472	9			1.13673	-1.02593	-1.05481	Q9BXB4;H7C487;Q9BXB5	Q9BXB4	Oxysterol-binding protein-related protein 11	OSBPL11	83.642
23.1481	23.7224	23.5683	23.8258	23.1814	23.9756	23.5423	22.1631	3	11.7	26.7995	11			0.366607	-0.350573	-0.383424	Q2TAM5;E9PKH5;A0A087X0W8;Q04206;E9PI38;E9PQS6;E9PKV4;A0A087WVP0	Q2TAM5;E9PKH5;A0A087X0W8;Q04206	Transcription factor p65	RELA	42.868
22.6253	23.6859	22.0284	23.1052	22.9139	21.3531	22.1696	21.2025	4	14.3	27.2312	12			0.910269	-0.951434	-0.923445	A0A0C4DGA2;O75521;F8WAW4;F8W6J1;F1LLU7;C9JB63	A0A0C4DGA2;O75521;F8WAW4;F8W6J1;F1LLU7;C9JB63	Enoyl-CoA delta isomerase 2, mitochondrial	ECI2	40.183
23.8977	23.7549	24.6757	23.6623	22.2905	25.5685	24.2804	23.7128	4	16.1	27.4537	11			0.0163391	-0.0346298	-0.0284411	H7C469;A0A1B0GW44;A0A1B0GV23;A0A1B0GVD5;A0A1B0GWE8;A0A1B0GU92;A0A1B0GU03;P07339;H7C1V0;A0A1B0GVP3;A0A1B0GVF1;F8W787;F8WD96;C9JH19	H7C469;A0A1B0GW44;A0A1B0GV23;A0A1B0GVD5;A0A1B0GWE8;A0A1B0GU92;A0A1B0GU03;P07339;H7C1V0;A0A1B0GVP3	Cathepsin D;Cathepsin D light chain;Cathepsin D heavy chain	CTSD	35.785
23.9483	23.8535	24.3838	24.6864	24.0774	23.9072	24.125	21.5862	3	9.4	27.391	10			0.578572	-0.794077	-0.693926	Q13564;H3BMR3;J3QRA5;J3KRK3	Q13564;H3BMR3;J3QRA5	NEDD8-activating enzyme E1 regulatory subunit	NAE1	60.246
24.602	24.7603	24.9241	24.6475	24.1517	24.0223	23.5839	22.4192	4	11.6	27.6185	17			1.60153	-1.18915	-1.32026	Q9NP92	Q9NP92	28S ribosomal protein S30, mitochondrial	MRPS30	50.364
22.2364	23.4026	22.93	23.7694	22.7156	23.8838	24.0742	21.4684	4	29.9	26.6598	10			0.0243984	-0.0491071	-0.0413571	A0A024RA52;P25787;C9JCK5	A0A024RA52;P25787;C9JCK5	Proteasome subunit alpha type;Proteasome subunit alpha type-2	PSMA2	25.898
25.538	25.7059	25.9886	25.6008	25.7694	24.8933	26.5588	21.6968	4	23.6	28.9951	10			0.402183	-0.978798	-0.622938	J3KMX5;P62277;E9PS50	J3KMX5;P62277	40S ribosomal protein S13	RPS13	16.733
26.4612	24.1095	22.7655	24.847	24.7878	24.9587	25.3411	23.4484	3	21.3	28.1161	12			0.0348773	0.0882235	0.0642373	P61758;B4DWR3	P61758;B4DWR3	Prefoldin subunit 3	VBP1	22.658
23.8628	23.8627	24.6241	24.2972	24.3974	24.1867	23.5949	22.2802	4	6.9	27.286	15			0.487373	-0.54688	-0.541002	Q8IXB1;A0A087WXH7;E7EP04	Q8IXB1;A0A087WXH7;E7EP04	DnaJ homolog subfamily C member 10	DNAJC10	91.079
23.433	23.7591	23.7547	23.905	23.624	23.8802	23.4957	20.5344	4	26.2	26.9165	19			0.473486	-0.829396	-0.641246	P31150;G5E9U5	P31150	Rab GDP dissociation inhibitor alpha	GDI1	50.582
24.7831	23.4544	24.2673	23.7073	24.6451	24.3126	24.0794	21.6992	5	13.8	27.4689	14			0.198406	-0.368963	-0.298907	Q9NS86	Q9NS86	LanC-like protein 2	LANCL2	50.854
23.4925	23.9453	24.1216	23.9979	23.8171	24.2116	23.9401	21.6022	6	5.4	27.0908	19			0.34459	-0.496593	-0.444194	Q9UGL1;B3KV94	Q9UGL1;B3KV94	Lysine-specific demethylase 5B	KDM5B	175.66
23.4244	23.3636	24.0962	23.6528	23.2335	24.1632	23.477	22.1652	5	5.7	26.8498	18			0.362706	-0.374515	-0.395653	O60306;H0YH15	O60306	Intron-binding protein aquarius	AQR	171.29
25.3671	25.8839	23.5317	25.6555	24.98	25.354	25.2132	21.9477	5	11.4	28.418	17			0.320252	-0.735818	-0.499369	Q15061;C9JEE7;C9IZK7	Q15061	WD repeat-containing protein 43	WDR43	74.89
24.8783	24.9103	24.776	25.6435	24.2055	25.0505	25.4358	21.8704	5	10	28.2468	20			0.507507	-0.911484	-0.688638	Q02809;Q5JXB7;Q5JXB8	Q02809	Procollagen-lysine,2-oxoglutarate 5-dioxygenase 1	PLOD1	83.549
23.172	23.6426	23.2535	23.4748	23.2283	22.9736	23.2764	22.5346	5	8.2	26.3827	19			0.978092	-0.38251	-0.545972	A0A0D9SEJ5;F5GY05;Q96EK7	A0A0D9SEJ5;F5GY05;Q96EK7	Constitutive coactivator of peroxisome proliferator-activated receptor gamma	FAM120B	105.19
23.7914	23.9548	24.2116	24.0194	24.008	23.7496	23.7598	21.3652	6	3.5	27.2625	16			0.578951	-0.773634	-0.68621	O43149;I3L141;I3L3Q3	O43149	Zinc finger ZZ-type and EF-hand domain-containing protein 1	ZZEF1	331.07
24.0307	24.7677	25.1297	24.2431	24.9338	23.9874	24.2916	21.2406	6	26.6	27.7281	22			0.498366	-0.92944	-0.687221	P19784;H3BSA1;H3BNI9;H3BV19	P19784;H3BSA1	Casein kinase II subunit alpha	CSNK2A2	41.213
23.8896	23.9339	24.0365	24.5347	22.0076	23.2486	22.7294	22.947	3	13.8	27.2078	11			2.38901	-1.36554	-1.70027	Q96B26	Q96B26	Exosome complex component RRP43	EXOSC8	30.039
24.0599	24.0627	23.7527	24.3293	21.4395	24.2701	22.8815	24.1087	3	9.4	27.1633	13			0.625513	-0.876178	-0.750911	Q8NFW8;F5H296;F5GYM0	Q8NFW8	N-acylneuraminate cytidylyltransferase	CMAS	48.379
21.9657	23.7134	24.4728	24.5002	24.0627	20.8713	21.8156	22.4984	3	10.9	27.036	13			0.737862	-1.35102	-0.966876	Q969S3	Q969S3	Zinc finger protein 622	ZNF622	54.271
24.301	23.9182	24.0103	24.4972	23.4796	23.7507	21.6695	24.0583	3	10.5	27.291	16			0.856339	-0.942147	-0.894897	E9PQ57;P78406;B0QZ36;E9PPG9;B0QZ37	E9PQ57;P78406;B0QZ36;E9PPG9	mRNA export factor	RAE1	47.831
24.4564	24.1717	22.9315	24.1041	21.9257	22.4626	22.8991	22.3786	5	18.6	27.2539	10			2.0624	-1.49945	-1.68189	A0A0J9YYL3;A0A0J9YXJ8;A0A0J9YVP6;A0A0J9YXX5;Q9UHX1;A0A0J9YVR6;E9PQ56;A0A0J9YWM1;H0YEM1;E9PMU7;E9PN18;E9PL19;H0YCP8	A0A0J9YYL3;A0A0J9YXJ8;A0A0J9YVP6;A0A0J9YXX5;Q9UHX1;A0A0J9YVR6;E9PQ56;A0A0J9YWM1;H0YEM1	Poly(U)-binding-splicing factor PUF60	PUF60	54.626
22.9919	23.4114	22.9607	22.8425	22.9178	23.7407	22.416	23.2748	4	13	26.346	11			0.0404344	0.0356765	0.0442428	Q9BVI4;F5H303	Q9BVI4	Nucleolar complex protein 4 homolog	NOC4L	58.467
25.4332	22.9455	24.4584	24.0986	24.7355	24.2287	22.0158	24.9686	3	10.4	27.7275	7			0.107395	-0.246768	-0.183025	Q9BSL1	Q9BSL1	Ubiquitin-associated domain-containing protein 1	UBAC1	45.338
25.6456	25.2374	25.229	21.7239	22.2848	22.5591	24.7715	25.9693	3	13.5	28.243	14			0.170968	-0.562834	-0.316925	P49257	P49257	Protein ERGIC-53	LMAN1	57.548
23.7408	23.4765	22.9081	23.1166	22.892	22.792	22.4156	23.4863	3	19	26.3511	12			0.694827	-0.414062	-0.52479	A0A1B0GVD3;Q6ZN17;A0A1B0GTK2	A0A1B0GVD3;Q6ZN17;A0A1B0GTK2	Protein lin-28 homolog B	LIN28B	27.957
22.0413	22.2924	22.6777	22.2464	22.2793	23.2608	21.518	21.8848	4	10.8	25.3208	18			0.0706889	-0.0787306	-0.0876554	Q6DKJ4;A0A0G2JQK5;I3L4V6	Q6DKJ4;A0A0G2JQK5	Nucleoredoxin	NXN	48.392
23.8284	24.6372	24.4827	24.3685	22.2261	23.1479	24.1434	24.0888	4	21.9	27.2048	16			0.978274	-0.927669	-0.940431	Q96GX9;S4R3D6	Q96GX9;S4R3D6	Methylthioribulose-1-phosphate dehydratase	APIP	27.125
23.6721	23.591	23.3081	23.9318	21.9045	22.7169	21.9599	22.5049	3	6.8	26.9983	9			2.89103	-1.35425	-1.83381	Q9NRG9;H3BU82;F8VZ44;F8VUB6	Q9NRG9;H3BU82;F8VZ44	Aladin	AAAS	59.573
24.639	23.9625	24.0914	23.9795	21.2985	23.7685	24.2623	24.527	4	14.1	27.3033	11			0.411714	-0.704056	-0.560652	Q9NZL9;H7C0X7;E5RJR3	Q9NZL9;H7C0X7	Methionine adenosyltransferase 2 subunit beta	MAT2B	37.551
21.7212	25.8401	26.4284	21.9359	26.6158	26.3041	26.6432	25.9535	3	19.4	29.6809	11			0.975892	2.39775	1.36244	M0R210;A0A087WZ27;P62249;M0QX76;M0R1M5;M0R3H0;Q6IPX4	M0R210;A0A087WZ27;P62249;M0QX76;M0R1M5;M0R3H0;Q6IPX4	40S ribosomal protein S16	RPS16;ZNF90	14.419
22.8365	22.2367	22.7377	21.6877	21.6897	21.6147	21.5973	21.3918	3	5.2	24.902	11			1.59201	-0.801273	-1.03854	E7EXA6;A0A0D9SF58;Q8WVB6	E7EXA6;A0A0D9SF58;Q8WVB6	Chromosome transmission fidelity protein 18 homolog	CHTF18	107.43
23.7169	23.7599	23.7488	23.4147	22.5265	23.8045	22.7269	21.6669	3	9.7	26.6894	11			1.14814	-0.978881	-1.03363	O15144;G5E9S7;C9JTV5;G5E9J0	O15144	Actin-related protein 2/3 complex subunit 2	ARPC2	34.333
23.7848	23.6672	23.8409	23.3206	21.5844	22.9611	22.8345	23.1197	3	14.8	26.7498	9			1.49218	-1.02841	-1.18132	Q96DI7;Q9NSS8	Q96DI7	U5 small nuclear ribonucleoprotein 40 kDa protein	SNRNP40	39.31
24.7769	22.9849	26.0419	23.0211	22.4035	24.6827	22.6964	23.2148	4	8.2	27.4124	10			0.484893	-0.956862	-0.684644	G3V4F7;P61011	G3V4F7;P61011	Signal recognition particle 54 kDa protein	SRP54	48.67
24.0206	23.4056	23.7519	23.8397	23.7383	23.7611	23.9526	23.9881	3	4.8	27.0669	16			0.308463	0.105583	0.16391	H0Y612;Q9UPN9	H0Y612;Q9UPN9	E3 ubiquitin-protein ligase TRIM33	TRIM33	98.891
23.8424	23.8501	23.6639	23.9686	24.0283	22.4056	21.9113	22.7379	4	7.6	27.6165	13			1.2274	-1.06049	-1.10861	Q93050;B7Z641;B7Z2A9;K7EPG4;K7EM24;K7EN36;F5H1T6	Q93050;B7Z641;B7Z2A9;K7EPG4	V-type proton ATPase 116 kDa subunit a isoform 1;V-type proton ATPase subunit a	ATP6V0A1	96.412
22.6373	23.2036	22.8644	23.1499	22.2298	22.8686	22.921	22.5839	3	3.3	26.0403	20			0.744575	-0.312973	-0.443107	A0A1B0GV47;Q7Z4S6;H0YHT2;H0YIM7;H0YIM6;H0YI78	A0A1B0GV47;Q7Z4S6;H0YHT2	Kinesin-like protein KIF21A	KIF21A	184.71
23.4294	24.6372	24.1642	23.4312	24.6695	24.9127	24.8106	24.2918	4	6.8	27.7823	16			1.2247	0.755638	0.91484	Q96SU4;A0A096LPC8;H0YE19	Q96SU4	Oxysterol-binding protein-related protein 9	OSBPL9	83.184
23.1876	22.9443	22.9439	21.4328	23.7147	23.3169	23.1362	23.0302	3	10	26.4864	7			0.773388	0.672348	0.72336	P00352	P00352	Retinal dehydrogenase 1	ALDH1A1	54.861
26.4961	26.5786	26.0619	25.7346	26.2513	26.1297	25.8388	26.133	4	25.4	29.434	22			0.244285	-0.12961	-0.181112	P51991;H7C1J8	P51991	Heterogeneous nuclear ribonucleoprotein A3	HNRNPA3	39.594
23.4475	24.2921	23.4911	23.732	24.3534	22.6509	22.9077	23.1286	4	11.4	26.909	10			0.521943	-0.480514	-0.519869	O95747;C9JIG9	O95747;C9JIG9	Serine/threonine-protein kinase OSR1	OXSR1	58.022
23.2638	23.7003	23.1404	23.7761	23.3029	23.7077	24.1504	21.7948	4	6	26.8791	13			0.16694	-0.231202	-0.223331	Q66K74;M0QXQ9;M0QY41;M0QZ50;M0R1J2	Q66K74;M0QXQ9;M0QY41	Microtubule-associated protein 1S;MAP1S heavy chain;MAP1S light chain	MAP1S	112.21
23.6078	24.2802	23.5876	23.739	23.7782	24.0917	23.6572	23.2083	3	11.8	27.1065	14			0.192675	-0.11983	-0.160917	P51580	P51580	Thiopurine S-methyltransferase	TPMT	28.18
23.6135	23.0402	22.5148	22.134	21.8473	21.1244	22.179	23.0753	3	7.8	25.8344	13			0.727272	-0.769132	-0.756292	J3KNN7;Q7Z569	J3KNN7;Q7Z569	BRCA1-associated protein	BRAP	64.279
24.7178	24.3592	24.0339	24.0577	23.758	23.9847	24.1048	23.8764	3	3.8	27.3839	16			1.06298	-0.361185	-0.534002	Q8WWM7;H3BUF6	Q8WWM7;H3BUF6	Ataxin-2-like protein	ATXN2L	113.37
22.3348	25.3993	25.2675	26.1677	24.0491	25.426	25.3255	24.9615	3	7.7	28.6697	10			0.0582314	0.148193	0.105908	P08559;Q5JPU0;Q5JPT9;Q5JPU1;Q5JPU2	P08559;Q5JPU0;Q5JPT9;Q5JPU1	Pyruvate dehydrogenase E1 component subunit alpha, somatic form, mitochondrial	PDHA1	43.295
23.4268	23.8247	24.2099	24.1728	23.7845	24.4805	23.7462	23.4044	3	31.5	27.2359	15			0.0670846	-0.0546432	-0.0691477	P61326;Q96A72;F5H6N1;F5H6P7;F5H3U9	P61326;Q96A72;F5H6N1;F5H6P7	Protein mago nashi homolog;Protein mago nashi homolog 2	MAGOH;MAGOHB	17.163
23.5805	23.2175	22.9594	23.8298	23.3236	23.0003	22.9786	23.414	3	8.8	26.5694	15			0.437372	-0.217665	-0.301358	K7ELL7;P14314;A0A0C4DGP4	K7ELL7;P14314;A0A0C4DGP4	Glucosidase 2 subunit beta	PRKCSH	60.192
22.7193	22.0456	22.9775	22.0569	22.5525	21.9767	22.2825	23.1423	3	6.6	25.5924	15			0.0391948	0.0386701	0.0459177	Q7Z417	Q7Z417	Nuclear fragile X mental retardation-interacting protein 2	NUFIP2	76.12
24.5314	24.6866	24.382	24.8486	21.2488	25.3156	24.0177	24.2633	3	4.2	27.9296	17			0.465682	-0.900772	-0.655795	Q9BXP5;H7C3A1	Q9BXP5;H7C3A1	Serrate RNA effector molecule homolog	SRRT	100.67
23.2593	23.2256	23.2529	22.5391	23.0503	23.1167	23.1652	22.8721	3	5.8	26.368	9			0.0332564	-0.0181499	-0.0263758	Q9H857;H7C519	Q9H857;H7C519	5-nucleotidase domain-containing protein 2	NT5DC2	60.718
23.3003	23.4026	23.425	23.8438	23.4475	23.8661	22.8212	23.815	4	19.2	26.9058	20			0.00686874	-0.00551748	-0.00717363	Q00535	Q00535	Cyclin-dependent-like kinase 5	CDK5	33.304
24.3522	24.5057	25.0785	25.1981	24.4144	24.5455	24.9765	25.4221	4	6.6	28.1494	21			0.0643509	0.0559878	0.0691873	Q9NW13;C9JE21;C9JAA9	Q9NW13	RNA-binding protein 28	RBM28	85.737
24.4781	24.5856	24.0454	25.3329	25.2483	25.1299	24.7247	24.4146	5	21.2	28.0872	17			0.351724	0.268857	0.324354	P38117;M0QY67	P38117	Electron transfer flavoprotein subunit beta	ETFB	27.843
23.6931	23.3953	22.5279	23.2305	24.79	23.3198	23.1291	24.0518	3	3.3	27.002	15			0.64678	0.61096	0.641519	Q7Z3K3	Q7Z3K3	Pogo transposable element with ZNF domain	POGZ	155.34
23.5581	23.5738	23.5321	23.4414	22.0586	22.8387	23.6502	23.5982	4	5.4	26.7278	19			0.618821	-0.489928	-0.559168	Q9BUQ8	Q9BUQ8	Probable ATP-dependent RNA helicase DDX23	DDX23	95.581
23.3675	23.0019	23.0169	23.3065	22.9812	22.8018	22.8355	23.3362	3	12.5	26.6125	20			0.554298	-0.184485	-0.281633	Q8NCA5;C9J3G8;E9PH82	Q8NCA5	Protein FAM98A	FAM98A	55.4
22.962	23.3106	23.257	23.5278	22.7522	23.1994	23.1254	23.2753	5	7.1	26.4749	14			0.487934	-0.176245	-0.265237	Q8IWR0;I3L2K5;I3L382;I3L2N8	Q8IWR0;I3L2K5	Zinc finger CCCH domain-containing protein 7A	ZC3H7A	110.54
24.6127	24.1189	24.3113	24.1469	24.2367	25.1907	25.3542	24.7743	4	5.5	28.0537	15			1.12998	0.591485	0.764285	Q8N1G2;Q5T7F5	Q8N1G2;Q5T7F5	Cap-specific mRNA (nucleoside-2-O-)-methyltransferase 1	CMTR1	95.32
24.0338	22.5451	23.8908	23.4603	22.6695	23.0196	21.8963	22.2117	4	15.4	26.4949	8			1.31947	-1.0332	-1.12683	Q10567	Q10567	AP-1 complex subunit beta-1	AP1B1	104.64
22.8268	22.8661	21.921	23.2196	23.0098	22.9678	23.4072	22.8377	3	8.7	26.3531	23			0.529711	0.347243	0.432474	Q9UJX3;H0YIW2	Q9UJX3	Anaphase-promoting complex subunit 7	ANAPC7	66.855
21.7027	24.4798	24.4852	24.7113	25.0018	25.42	24.9058	24.6922	3	8.1	28.1136	16			0.784801	1.16021	0.941615	Q01650;H0YJ95;A0A0C4DGL4;G3V4Z6;Q9UM01;Q92536	Q01650	Large neutral amino acids transporter small subunit 1	SLC7A5	55.01
23.7687	23.3108	24.6993	22.32	23.5491	23.7609	23.5247	22.8766	3	7.7	27.0661	19			0.0649531	-0.0968652	-0.0940139	E9PCN5;Q9H9A5;H7C1X9;H7C0K1	E9PCN5;Q9H9A5	CCR4-NOT transcription complex subunit 10	CNOT10	67.091
23.301	23.6041	23.7745	22.4097	24.4681	23.5393	23.5881	24.1113	3	7.1	27.0744	15			0.87709	0.654353	0.74672	O43913;G3V0H0	O43913	Origin recognition complex subunit 5	ORC5	50.282
23.2956	23.8924	23.4079	23.4059	23.2552	23.0169	22.6549	22.8057	5	14.7	26.5445	11			1.64265	-0.567247	-0.82626	Q96GW9	Q96GW9	Methionine--tRNA ligase, mitochondrial	MARS2	66.59
27.1662	27.1754	27.6901	27.5276	27.4023	27.1102	27.4903	27.0672	4	28	30.6509	27			0.30687	-0.122351	-0.183221	P62917;E9PKU4;E9PP36;G3V1A1;E9PKZ0	P62917;E9PKU4;E9PP36;G3V1A1;E9PKZ0	60S ribosomal protein L8	RPL8	28.024
23.4382	24.291	23.9631	24.7081	22.2164	22.7781	20.8482	24.239	5	5.8	27.088	12			1.09603	-1.57966	-1.26251	Q9H2U1;E7EWK3;H7C5F5	Q9H2U1;E7EWK3	ATP-dependent RNA helicase DHX36	DHX36	114.76
25.1684	25.225	24.9478	24.8552	25.1539	23.7479	24.3756	24.7077	6	6.1	28.017	21			0.907729	-0.55285	-0.683481	O14802;Q7Z755	O14802	DNA-directed RNA polymerase III subunit RPC1	POLR3A	155.64
24.492	24.2623	24.3246	24.7318	24.65	24.8284	24.5406	24.3104	4	11	27.9193	17			0.373887	0.129708	0.199303	F6TLX2;Q9HC38;I3L3Q4	F6TLX2;Q9HC38;I3L3Q4	Glyoxalase domain-containing protein 4	GLOD4	54.719
23.2717	23.9196	23.9697	23.5106	24.2421	23.7212	23.0943	24.0699	4	17	27.0905	19			0.14243	0.113985	0.141812	A0A0B4J2A4;P42765;K7EME0	A0A0B4J2A4;P42765;K7EME0	3-ketoacyl-CoA thiolase, mitochondrial	ACAA2	41.601
25.4422	25.267	25.4364	22.7523	24.492	25.583	25.1529	24.3569	3	11.2	28.4594	16			0.0866918	0.171773	0.140953	P52788;H7C2R7	P52788	Spermine synthase	SMS	41.268
22.4707	21.7635	22.1908	22.2574	21.8021	21.9035	22.0221	22.1066	3	1.8	25.7483	15			0.619809	-0.212021	-0.319993	P46100;A0A096LPG6;A0A087WWG0;A0A096LNX6;A0A096LNW1;A0A096LNL9	P46100	Transcriptional regulator ATRX	ATRX	282.58
22.9988	22.9732	22.9537	22.9133	22.4339	22.2174	23.2029	22.7101	3	4.8	26.1099	11			0.730329	-0.318667	-0.446655	H0Y360;Q01433;E9PIJ1;E9PJF6;H0YCL9	H0Y360;Q01433	AMP deaminase 2	AMPD2	98.401
24.0201	24.1535	24.3228	24.3668	23.7418	23.4467	23.6075	24.1013	4	12.3	27.2408	17			1.65311	-0.491476	-0.743964	Q13451	Q13451	Peptidyl-prolyl cis-trans isomerase FKBP5;Peptidyl-prolyl cis-trans isomerase FKBP5, N-terminally processed	FKBP5	51.212
24.4298	24.0959	23.9526	24.0073	24.171	24.3988	23.6306	23.9658	5	15.6	27.4038	18			0.157084	-0.0798302	-0.114861	Q5TFE4;Q5QPD0	Q5TFE4;Q5QPD0	5-nucleotidase domain-containing protein 1	NT5DC1	51.844
23.9669	23.7652	24.4551	23.153	24.1914	23.5331	23.6994	23.9088	3	7.9	27.1921	10			0.00202032	-0.00184727	-0.00229569	P55010;H0YMJ8;H0YM54;H0YLZ1;H0YN40	P55010	Eukaryotic translation initiation factor 5	EIF5	49.222
22.2684	22.2675	22.9086	22.0065	22.7297	22.6331	23.0676	22.0962	3	20.2	25.8866	19			0.430363	0.268872	0.34548	K7EL20;O75821;K7ENA8;K7EP16;K7EL60	K7EL20;O75821;K7ENA8	Eukaryotic translation initiation factor 3 subunit G	EIF3G	29.283
24.1472	23.6877	23.7589	23.3502	23.8269	23.4086	23.6156	23.8837	5	32.2	27.0848	18			0.0976509	-0.05231	-0.0751424	E9PLB0;E9PM61;D6R9K7;U3KQD5;J3QRR5;E9PB51;Q9BQ04;Q9BWF3	E9PLB0;E9PM61;D6R9K7;U3KQD5;J3QRR5;E9PB51;Q9BQ04;Q9BWF3	RNA-binding protein 4B;RNA-binding protein 4	RBM4B;RBM4	16.264
24.9624	25.514	25.6991	25.7586	25.3033	24.5661	24.9358	24.831	4	31.7	28.5355	23			1.28693	-0.574473	-0.779381	Q04917;A2IDB2;P31947;Q4VY20;A0A0J9YWZ2;Q4VY19;A0A0J9YWE8	Q04917;A2IDB2	14-3-3 protein eta	YWHAH	28.218
23.9725	24.3989	24.2505	24.7292	23.8911	23.5401	25.194	24.2319	4	9.4	27.6481	18			0.118178	-0.123467	-0.138865	Q0VDF9	Q0VDF9	Heat shock 70 kDa protein 14	HSPA14	54.794
22.1098	22.0569	23.1374	23.0953	24.0258	24.0585	23.3724	24.4165	4	11.2	27.0782	8			1.99882	1.36846	1.57413	B4DFG0;P35659;D6RDA2;D6R9L5;H0Y993	B4DFG0;P35659;D6RDA2;D6R9L5;H0Y993	Protein DEK	DEK	39.5
23.135	23.4439	23.4815	22.4481	23.0169	23.5285	23.5439	23.2973	4	13.6	26.7033	14			0.350598	0.219543	0.285384	Q7L2H7;H0YCQ8;E9PRY0;J3KNJ2;E9PN86	Q7L2H7;H0YCQ8;E9PRY0;J3KNJ2	Eukaryotic translation initiation factor 3 subunit M	EIF3M	42.502
21.2688	22.1393	20.9012	22.1726	23.1483	22.8784	23.1428	23.0031	5	10.1	26.866	16			2.33189	1.42268	1.72519	Q99615;K7ESP1;K7EIH8;K7ELJ8;K7EPP7;K7EJ24	Q99615;K7ESP1;K7EIH8	DnaJ homolog subfamily C member 7	DNAJC7	56.44
21.8105	23.2938	21.9705	22.1566	23.5029	23.2987	23.8623	23.8982	4	6.4	27.1209	16			1.96565	1.33264	1.53882	Q9Y446;E9PRW6;E9PKC4;E9PQ15;E9PJR7;E9PK71	Q9Y446;E9PRW6;E9PKC4;E9PQ15	Plakophilin-3	PKP3	87.081
23.9542	24.3331	23.6972	24.7661	24.0395	23.403	22.9915	24.051	4	17.8	27.2646	16			0.809918	-0.56639	-0.667779	J3KTL2;Q07955;J3KSR8;J3QQV5;J3KSW7	J3KTL2;Q07955;J3KSR8	Serine/arginine-rich splicing factor 1	SRSF1	28.329
23.1908	23.392	23.1903	23.2846	23.8004	24.8153	23.3142	24.3273	3	28.6	27.3519	14			1.29496	0.799865	0.965709	O00148;K7EPJ3;K7EQN7;K7ENP6;A0A0G2JHN7;K7EL56;K7EIL8;F6U6E2;F6S2B7;F6SXL5	O00148	ATP-dependent RNA helicase DDX39A	DDX39A	49.129
24.3957	24.0519	23.9762	23.4061	23.6866	23.4877	23.1213	23.5701	3	8.3	27.0349	16			1.06833	-0.491055	-0.664707	A0A1B0GTY1;A0A1B0GUC3;A0A1B0GV98;A0A1B0GTC5;A0A1B0GU26;A0A1B0GTC3;A0A1B0GVH5;Q9C0B1;A0A1B0GTI3	A0A1B0GTY1;A0A1B0GUC3;A0A1B0GV98;A0A1B0GTC5;A0A1B0GU26;A0A1B0GTC3;A0A1B0GVH5;Q9C0B1	Alpha-ketoglutarate-dependent dioxygenase FTO	FTO	48.605
21.7713	24.9449	25.3322	24.8921	25.8692	25.8623	24.7794	21.9665	4	10.5	28.7772	12			0.115361	0.384205	0.221113	P63151;E5RFR9;E5RIY1;Q00005;Q9Y2T4;Q66LE6	P63151;E5RFR9	Serine/threonine-protein phosphatase 2A 55 kDa regulatory subunit B alpha isoform	PPP2R2A	51.691
25.4445	25.2259	25.0226	24.4149	24.9228	24.751	24.4526	25.7557	5	29.6	28.3768	24			0.0558524	-0.0564523	-0.0659228	P30085;Q5T0D2	P30085	UMP-CMP kinase	CMPK1	22.222
23.9665	25.6544	26.4439	25.868	24.2213	26.2647	25.1665	24.6299	3	17	28.9013	18			0.241832	-0.412537	-0.346004	Q8NCW5;Q5T3I4;Q5T3I3	Q8NCW5	NAD(P)H-hydrate epimerase	APOA1BP	31.674
24.9377	25.4164	25.322	25.2564	25.7196	25.4875	25.2972	25.0247	3	21.2	28.6956	22			0.357205	0.14914	0.219288	Q9H944;B7ZBQ3;B7ZBQ1;A6PVP4	Q9H944;B7ZBQ3	Mediator of RNA polymerase II transcription subunit 20	MED20	23.222
27.1854	27.008	26.9676	26.717	26.5463	26.5589	26.9624	27.0315	4	30.7	30.18	20			0.56474	-0.194732	-0.294522	M0R0P7;M0R3D6;M0R1A7;Q02543;M0R117	M0R0P7;M0R3D6;M0R1A7;Q02543;M0R117	60S ribosomal protein L18a	RPL18A	16.177
23.5859	23.9151	23.5071	22.7469	23.1345	23.0783	23.1764	23.261	5	10.2	26.6071	21			0.506571	-0.276195	-0.368287	Q7L2J0	Q7L2J0	7SK snRNA methylphosphate capping enzyme	MEPCE	74.354
23.9947	24.3099	24.6159	23.8207	24.4113	24.0869	24.4227	24.1345	5	13.7	27.5298	15			0.15254	0.0785303	0.112686	Q8NC51	Q8NC51	Plasminogen activator inhibitor 1 RNA-binding protein	SERBP1	44.965
25.1884	26.2037	24.8253	25.6111	25.5251	25.57	24.5822	21.9868	4	21.7	28.5657	12			0.54163	-1.04109	-0.748035	P35219	P35219	Carbonic anhydrase-related protein	CA8	32.973
24.0888	24.0816	24.0479	24.1002	23.8044	24.2685	23.9907	23.8745	7	14.3	27.3014	21			0.408375	-0.0950904	-0.157757	Q14145;K7EJ49;K7EJD8;K7ESE0;K7EPZ3;K7EQX2	Q14145	Kelch-like ECH-associated protein 1	KEAP1	69.666
27.203	27.2893	27.9974	29.5516	27.6622	27.4264	28.577	29.29	6	25.3	31.7375	24			0.123415	0.228597	0.191652	Q02878;F8VR69;F8VZ45;U3KQR5	Q02878	60S ribosomal protein L6	RPL6	32.728
23.7204	23.649	24.7605	24.4463	23.7374	24.1274	24.314	22.4122	5	13.3	27.5286	17			0.435469	-0.496289	-0.492038	Q96P11;Q63ZY6	Q96P11	Probable 28S rRNA (cytosine-C(5))-methyltransferase	NSUN5	46.691
24.5288	23.8159	23.9354	24.0602	23.7409	24.287	24.8567	23.5152	6	17.4	27.5413	10			0.0148791	0.0148773	0.0177534	O60701;E7ER95;E7ER83;E7ETF4;E7EV97	O60701	UDP-glucose 6-dehydrogenase	UGDH	55.023
26.169	26.1108	26.1672	26.7724	26.3547	26.0442	26.1248	26.2918	5	21.2	29.5609	18			0.237293	-0.10097	-0.150206	G3V576;G3V4W0;B4DY08;B2R5W2;G3V4C1;G3V2Q1;P07910;A0A0G2JPF8;A0A0G2JNQ3;P0DMR1;O60812;B7ZW38;B2RXH8;G3V5X6;G3V3K6;G3V251;B4DSU6;G3V555;G3V575;G3V2H6;G3V4M8;G3V5V7;G3V2D6	G3V576;G3V4W0;B4DY08;B2R5W2;G3V4C1;G3V2Q1;P07910;A0A0G2JPF8;A0A0G2JNQ3;P0DMR1;O60812;B7ZW38;B2RXH8;G3V5X6;G3V3K6;G3V251;B4DSU6;G3V555;G3V575	Heterogeneous nuclear ribonucleoproteins C1/C2;Heterogeneous nuclear ribonucleoprotein C-like 4;Heterogeneous nuclear ribonucleoprotein C-like 1;Heterogeneous nuclear ribonucleoprotein C-like 3;Heterogeneous nuclear ribonucleoprotein C-like 2	HNRNPC;HNRNPCL4;HNRNPCL1;HNRNPCL3;HNRNPCL2	25.256
25.0412	24.866	26.1248	24.4518	24.3237	25.9286	24.4173	24.859	5	28.4	28.5051	19			0.182031	-0.238799	-0.23588	P00492	P00492	Hypoxanthine-guanine phosphoribosyltransferase	HPRT1	24.579
22.1758	22.8248	22.1998	22.4254	22.354	22.6865	22.6493	23.1639	6	4.9	25.4894	15			0.65435	0.306975	0.423341	H0Y764;Q6ZNJ1;H7C3Y7;H7C354	H0Y764;Q6ZNJ1;H7C3Y7	Neurobeachin-like protein 2	NBEAL2	224.47
23.5053	23.0876	23.2347	22.604	22.078	22.4172	23.8362	20.9554	5	6.9	26.2765	15			0.595527	-0.786218	-0.700106	F5H658;Q14562	F5H658;Q14562	ATP-dependent RNA helicase DHX8	DHX8	134
26.3393	25.7627	25.7492	25.5826	25.7122	25.1689	25.3869	26.9554	4	23.2	29.2326	20			0.0423779	-0.0526228	-0.0564606	P32119;A6NIW5	P32119;A6NIW5	Peroxiredoxin-2	PRDX2	21.892
24.7302	24.5652	24.693	24.9027	24.7988	24.4244	24.8741	25.2879	5	7.6	28.0828	18			0.267494	0.123522	0.178962	Q9Y4W2	Q9Y4W2	Ribosomal biogenesis protein LAS1L	LAS1L	83.064
23.7285	23.2676	24.0979	23.3079	24.0054	23.5515	22.8534	23.9807	4	9.6	27.0001	19			0.00272473	-0.0027194	-0.00326528	P41240;H3BUM9;K7ENL8;K7ES68;K7EQY5;P42679	P41240	Tyrosine-protein kinase CSK	CSK	50.704
21.331	22.3016	23.4093	21.3114	23.8665	23.4874	23.6597	23.886	6	15	26.6691	11			1.74875	1.63659	1.62659	Q8NFF5;Q5T196;Q5T190;Q5T191	Q8NFF5;Q5T196	FAD synthase;Molybdenum cofactor biosynthesis protein-like region;FAD synthase region	FLAD1	65.265
26.3638	24.8048	26.7939	25.9437	25.6907	26.1531	26.0983	25.0389	4	22.2	29.3806	21			0.181031	-0.231328	-0.231619	P12004	P12004	Proliferating cell nuclear antigen	PCNA	28.768
25.3684	24.8666	25.6252	24.3815	25.4832	24.8527	25.6352	25.508	4	22.4	28.5964	22			0.419637	0.30935	0.374113	Q9BV86;S4R344;S4R3J7;S4R338	Q9BV86	N-terminal Xaa-Pro-Lys N-methyltransferase 1;N-terminal Xaa-Pro-Lys N-methyltransferase 1, N-terminally processed	NTMT1	25.387
25.345	24.4384	24.8227	24.6714	24.7518	24.6313	24.8304	24.7478	5	15.1	28.0978	21			0.154067	-0.0790844	-0.113539	F5H8F7;Q9UBL3;H0YBF6;H0YAQ0	F5H8F7;Q9UBL3	Set1/Ash2 histone methyltransferase complex subunit ASH2	ASH2L	55.324
26.9888	27.151	27.13	26.828	27.377	27.1439	26.8127	27.8196	5	28.1	30.5425	29			0.546421	0.263871	0.364263	H0YA96;H0Y8G5;Q14103;D6RAF8	H0YA96;H0Y8G5;Q14103;D6RAF8	Heterogeneous nuclear ribonucleoprotein D0	HNRNPD	23.811
22.5181	21.3112	23.1683	22.4305	26.0954	25.7447	25.5323	21.4997	6	30.7	28.5399	15			1.07061	2.36101	1.43455	E9PK01;P29692;E9PMW7;E9PPR1;E9PL12;E9PQ49;E9PI39;A0A087X1X7;E9PRY8;E9PIZ1;H0YCK7;E9PQZ1;E9PKK3;E9PK72;E9PK06;E9PNW6;E9PQC9;E9PJD0;H0YE58;H0YE72	E9PK01;P29692;E9PMW7;E9PPR1;E9PL12;E9PQ49;E9PI39;A0A087X1X7;E9PRY8;E9PIZ1;H0YCK7;E9PQZ1	Elongation factor 1-delta	EEF1D	28.821
22.8354	21.8451	21.3347	22.2319	21.2552	24.7655	24.047	24.1639	10	9.3	27.6527	13			0.895984	1.49611	1.11227	Q8N122;I3L436	Q8N122	Regulatory-associated protein of mTOR	RPTOR	149.04
23.988	24.4515	24.2417	24.1165	24.1553	23.9708	24.6462	24.2946	5	7.7	27.5968	17			0.147763	0.0673127	0.0999284	G5EA36;P30260;I3L394;F6QPS0;I3L2Z8;I3L328;I3L3H6	G5EA36;P30260	Cell division cycle protein 27 homolog	CDC27	91.737
23.2677	23.7131	23.3354	23.372	23.5121	23.1992	21.5815	23.9665	3	3.7	26.6782	9			0.280542	-0.357234	-0.347384	E7ET15;O15042;H7C4V2;E7EW00;H0Y8D9	E7ET15;O15042	U2 snRNP-associated SURP motif-containing protein	U2SURP	118.25
23.5974	22.6779	23.2476	23.8404	24.2926	24.5359	22.3498	23.6455	3	10	27.1105	16			0.27412	0.36512	0.347498	Q9H871	Q9H871	Protein RMD5 homolog A	RMND5A	43.992
24.5866	25.1084	25.3116	25.1549	24.7295	24.8787	22.2557	25.2242	4	16.4	28.2046	20			0.504206	-0.768379	-0.64137	Q99986;H0YJ50;H0YJF7;H0YJJ9	Q99986;H0YJ50	Serine/threonine-protein kinase VRK1	VRK1	45.476
22.7582	22.977	22.9702	23.2753	22.3049	22.8148	23.0893	20.8002	7	4.2	25.9823	16			0.689964	-0.742889	-0.72723	Q14571	Q14571	Inositol 1,4,5-trisphosphate receptor type 2	ITPR2	308.06
25.0593	22.9451	23.1527	23.2269	21.4538	21.7489	22.658	22.7256	5	10.7	26.3846	15			1.31456	-1.44944	-1.33362	P19525;F8WBH4;C9JZT2	P19525	Interferon-induced, double-stranded RNA-activated protein kinase	EIF2AK2	62.094
24.578	24.111	23.9581	24.1496	22.1284	24.2256	23.3811	24.6606	6	21.7	27.2696	20			0.474566	-0.600237	-0.559337	P11177;C9J634;F8WF02	P11177;C9J634;F8WF02	Pyruvate dehydrogenase E1 component subunit beta, mitochondrial	PDHB	39.233
25.4421	24.4079	24.702	24.4389	27.1266	25.984	25.4356	25.9347	3	11.8	29.1914	12			1.72177	1.3725	1.47415	A0A0A0MTI6;Q9NYP7;Q9NXB9	A0A0A0MTI6;Q9NYP7	Elongation of very long chain fatty acids protein;Elongation of very long chain fatty acids protein 5	ELOVL5	30.742
23.4662	22.9871	23.2534	23.9738	23.3058	24.0282	23.6038	24.5074	3	3.7	27.0729	9			0.627905	0.44114	0.528514	I3VM54;Q9Y2K7	I3VM54;Q9Y2K7	Lysine-specific demethylase 2A	KDM2A	130.66
24.0028	23.2763	23.6193	23.6618	22.6885	24.0288	23.4462	24.3281	3	6.9	26.9954	15			0.0148351	-0.0171452	-0.01925	Q9NUY8;C9IZ32;C9JAM5;E9PGE5	Q9NUY8;C9IZ32;C9JAM5	TBC1 domain family member 23	TBC1D23	78.321
25.9824	25.7506	26.3707	24.6942	26.2488	26.4407	26.9742	26.0604	4	34.7	29.567	13			0.906378	0.73153	0.804573	P24534;F2Z2G2;C9JZW3;F8WF65	P24534;F2Z2G2;C9JZW3	Elongation factor 1-beta	EEF1B2	24.763
23.2481	21.4401	23.929	23.8391	24.052	23.9717	24.1213	23.9371	4	25.3	27.1166	15			0.772524	0.906432	0.839643	P16152;E9PQ63;A8MTM1;O75828	P16152	Carbonyl reductase [NADPH] 1	CBR1	30.375
23.7631	23.5511	23.5279	23.4007	23.4636	23.2442	23.4057	24.0134	4	13.7	26.8477	11			0.0557156	-0.0289645	-0.0423919	H0Y2Y8;Q15942;C9IZ41;C9JJK5;H7C3D3	H0Y2Y8;Q15942;C9IZ41	Zyxin	ZYX	57.643
24.7941	23.9505	24.8062	25.4286	20.7502	22.4678	22.6799	24.0563	3	10.3	27.2492	19			1.64058	-2.25629	-1.81545	P30419;K7EN82;B7Z8J4	P30419;K7EN82	Glycylpeptide N-tetradecanoyltransferase 1	NMT1	56.806
23.594	22.935	23.1948	24.0358	23.4897	24.1579	23.7552	24.5079	3	9.2	27.1451	5			0.816015	0.537755	0.649066	H0YMG7;O94788;Q9UED3;H0YKL3	H0YMG7;O94788	Retinal dehydrogenase 2	ALDH1A2	53.762
24.9642	24.8136	24.8548	25.0176	24.6395	24.259	24.5408	25.0353	4	15.6	28.0366	17			0.88721	-0.293914	-0.440386	B7Z7P8;P62495;D6RCB3;D6RJE8;I3L492	B7Z7P8;P62495	Eukaryotic peptide chain release factor subunit 1	ETF1	47.475
25.1151	24.7882	24.8613	25.029	25.1131	24.8765	24.571	24.7269	4	8.1	28.1694	17			0.405178	-0.126528	-0.198434	H3BSH7;Q969X6;A0A0J9YWM9;H3BRM8;A0A0J9YXV4;J3KSE6;J3KTR0;H3BPD7;I3L4T9;J3KSI1;A0A0J9YWK2	H3BSH7;Q969X6;A0A0J9YWM9;H3BRM8;A0A0J9YXV4	Cirhin	CIRH1A	77.942
22.5236	22.9191	23.3214	23.6074	22.5132	23.073	23.2814	22.9218	3	9.6	26.4745	13			0.200605	-0.145525	-0.184937	Q96I24	Q96I24	Far upstream element-binding protein 3	FUBP3	61.64
24.5403	23.9773	23.9505	24.261	23.0587	23.956	23.7757	24.8582	4	10.5	27.4201	13			0.284177	-0.270125	-0.30175	Q15637;C9J792;F8WEV5	Q15637	Splicing factor 1	SF1	68.329
24.8982	24.6737	25.0716	24.8393	24.9891	24.4392	25.9254	25.5048	3	24.8	28.4099	11			0.468335	0.34392	0.413379	C9JXB8;C9JNW5;P83731	C9JXB8;C9JNW5;P83731	60S ribosomal protein L24	RPL24	14.369
25.4196	25.0854	24.9625	25.402	25.6577	25.7745	25.1632	24.4583	5	20	28.6222	13			0.0503874	0.0460453	0.0561208	Q05048;A0A0A0MSZ9;A3KFI9	Q05048	Cleavage stimulation factor subunit 1	CSTF1	48.357
23.3303	22.509	24.0543	24.4312	24.0409	23.8513	23.4244	24.1966	4	11	27.4574	12			0.268651	0.297098	0.310825	O60684;Q5TFJ7;S4R3E5;O15131	O60684;Q5TFJ7	Importin subunit alpha-7	KPNA6	60.029
24.4149	24.1989	23.802	24.2726	24.125	24.2623	23.9234	24.0928	3	9.1	27.461	11			0.187922	-0.0712028	-0.109782	Q15428;K7EMT0	Q15428	Splicing factor 3A subunit 2	SF3A2	49.255
25.7128	24.6729	24.9971	24.6449	24.816	25.1094	24.8724	25.8813	4	31.8	28.4301	15			0.182091	0.162865	0.191753	H3BQF1;P07741;H3BSW3;H3BQZ9;H3BQB1	H3BQF1;P07741;H3BSW3;H3BQZ9;H3BQB1	Adenine phosphoribosyltransferase	APRT	16.323
27.0358	24.8472	24.4393	25.1415	25.391	24.6633	26.2007	26.0502	4	21.6	28.8853	22			0.11607	0.210359	0.179204	Q07021;I3L3Q7;I3L3B0	Q07021;I3L3Q7;I3L3B0	Complement component 1 Q subcomponent-binding protein, mitochondrial	C1QBP	31.362
24.4801	24.4377	24.8207	24.437	24.9516	24.6945	24.6416	24.4468	3	13.8	27.9304	20			0.449927	0.139721	0.218521	Q16543;K7EL68;K7EQA9;K7EIU0;K7EKQ2	Q16543;K7EL68;K7EQA9	Hsp90 co-chaperone Cdc37;Hsp90 co-chaperone Cdc37, N-terminally processed	CDC37	44.468
24.9936	25.0739	25.3361	25.6756	25.3859	25.5048	25.4007	25.0134	5	37.8	28.6487	18			0.111365	0.0564275	0.0820559	P18669;Q8N0Y7;P15259	P18669	Phosphoglycerate mutase 1	PGAM1	28.804
22.8108	22.3611	21.3113	23.264	23.7267	21.8766	22.9772	22.398	5	4.3	26.151	13			0.212816	0.307808	0.285923	Q8IWV7;A0A087WTJ9	Q8IWV7	E3 ubiquitin-protein ligase UBR1	UBR1	200.21
25.6611	24.9646	24.1005	24.9906	24.0784	24.2005	24.2555	26.3029	4	34.5	28.3521	13			0.133454	-0.219892	-0.196132	Q04837;A0A0G2JLD8;E7EUY5;C9K0U8	Q04837;A0A0G2JLD8;E7EUY5;C9K0U8	Single-stranded DNA-binding protein, mitochondrial	SSBP1	17.259
22.3883	23.8033	24.1921	23.1194	25.025	23.0255	22.4599	21.9674	4	6.7	26.9994	9			0.122956	-0.256362	-0.200356	A0A087WVR3;A0A087WTW0;Q96T88;A0A087WWG9	A0A087WVR3;A0A087WTW0;Q96T88;A0A087WWG9	E3 ubiquitin-protein ligase UHRF1	UHRF1	91.099
22.9359	22.712	22.6558	22.7903	22.754	22.4272	22.6588	22.7132	3	8.1	25.9523	7			0.689297	-0.135203	-0.227235	P86791;P86790	P86791;P86790	Vacuolar fusion protein CCZ1 homolog;Vacuolar fusion protein CCZ1 homolog B	CCZ1;CCZ1B	55.866
23.1115	23.0396	23.0938	23.0115	23.0904	23.0214	22.5756	23.0372	3	2.8	26.3282	14			0.499639	-0.13293	-0.213829	Q92766;A0A087X055;C9JU34	Q92766	Ras-responsive element-binding protein 1	RREB1	181.42
24.5429	24.2498	24.6322	25.0153	24.5872	24.0365	24.1279	23.9223	4	17.7	27.7161	14			1.06753	-0.441625	-0.617778	O95456;F8WBH7	O95456	Proteasome assembly chaperone 1	PSMG1	32.854
27.8025	27.8936	27.78	28.2787	27.8083	27.7897	27.0668	28.0334	3	25.8	31.1545	16			0.5044	-0.264163	-0.357024	Q71UI9;P0C0S5;C9J0D1;C9J386;Q8IUE6;Q96QV6;P16104	Q71UI9;P0C0S5;C9J0D1	Histone H2A.V;Histone H2A.Z;Histone H2A	H2AFV;H2AFZ	13.509
24.1846	24.1467	23.8812	23.828	23.478	23.8336	23.7889	24.2017	5	10.1	27.1981	13			0.482581	-0.184566	-0.27391	Q96SI9;E9PKQ0;Q5JPA5	Q96SI9	Spermatid perinuclear RNA-binding protein	STRBP	73.652
25.081	23.9867	22.6717	23.5036	23.886	24.7144	24.0323	24.2388	4	2.3	27.4775	15			0.323256	0.407139	0.393579	A0A0A0MS59;A0A0C4DFX4;Q6ZRS2;A0A087X0E3	A0A0A0MS59;A0A0C4DFX4;Q6ZRS2;A0A087X0E3	Helicase SRCAP	SRCAP	315.61
22.1632	25.7399	26.3131	26.2757	25.5926	25.9021	26.5032	22.9545	5	32.1	29.2553	14			0.0312511	0.11512	0.0651441	Q13162;H7C3T4;A6NG45;A6NJJ0	Q13162	Peroxiredoxin-4	PRDX4	30.54
26.062	26.3904	26.3423	25.7541	25.9904	25.8027	26.1757	25.9292	7	12.5	29.3381	17			0.437704	-0.162715	-0.244295	Q9UG63;C9JHK9;C9JZV3	Q9UG63;C9JHK9;C9JZV3	ATP-binding cassette sub-family F member 2	ABCF2	71.289
24.0077	24.5532	25.2034	24.3125	21.6023	23.3356	24.3465	24.6762	5	9.5	27.5224	13			0.674504	-1.02907	-0.832539	Q9UKN8	Q9UKN8	General transcription factor 3C polypeptide 4	GTF3C4	91.981
21.8227	23.1474	22.7911	21.9921	20.5553	23.788	24.0994	24.8684	5	16.2	27.1422	11			0.387896	0.889416	0.591746	Q7L3T8	Q7L3T8	Probable proline--tRNA ligase, mitochondrial	PARS2	53.262
24.2888	24.0678	24.4232	23.6949	23.8358	24.0209	24.2668	24.2404	4	4.1	27.3828	15			0.0515583	-0.0277052	-0.0402306	O43156	O43156	TELO2-interacting protein 1 homolog	TTI1	122.07
23.202	23.673	23.4226	23.7199	22.8765	22.5371	23.0326	22.8468	5	6.7	26.4348	21			2.2897	-0.681167	-1.03415	Q9NTZ6	Q9NTZ6	RNA-binding protein 12	RBM12	97.394
23.7486	24.0007	21.8934	23.0173	24.4855	21.1618	23.8463	25.5568	3	6.8	27.5791	17			0.229618	0.597615	0.385949	Q969Z0;C9J7P5;C9IZN7;H7C4R5	Q969Z0;C9J7P5;C9IZN7	Protein TBRG4	TBRG4	70.737
23.8544	23.332	23.981	23.6114	23.7649	22.9663	24.0984	22.7298	3	5.3	26.939	13			0.374532	-0.30489	-0.357019	P48449;A0A0G2JQD0;C9J315	P48449;A0A0G2JQD0	Lanosterol synthase	LSS	83.308
23.3926	23.2971	23.3569	23.4312	23.9183	23.7049	24.4956	23.8237	3	6.4	27.0848	19			1.87361	0.616195	0.909096	K7ER00;Q9Y285;K7ERS0;K7EPH2;K7ER16	K7ER00;Q9Y285;K7ERS0;K7EPH2	Phenylalanine--tRNA ligase alpha subunit	FARSA	62.395
24.3585	24.7674	24.3998	24.2235	23.9891	24.5767	24.556	24.3053	6	12.1	27.691	17			0.173982	-0.0805645	-0.118503	Q9Y5X1;A0A087WVE4;A0A087WZW2	Q9Y5X1	Sorting nexin-9	SNX9	66.591
24.8577	25.1397	24.3544	24.877	24.3074	24.9811	25.0012	25.1549	4	13.7	28.163	20			0.0776651	0.0539622	0.0719509	O75083;D6RD66	O75083;D6RD66	WD repeat-containing protein 1	WDR1	66.193
25.0451	25.038	25.2445	25.1448	24.3781	24.3985	24.5645	24.4883	5	10.1	28.0764	20			4.27992	-0.660755	-1.16959	Q9H9T3;B4DKA4;H0YC54;E5RHY2;E5RIC0;E5RIZ7;H0YAP7;E5RHR2	Q9H9T3;B4DKA4	Elongator complex protein 3	ELP3	62.258
23.7403	23.4361	23.685	23.2111	23.1942	23.1857	23.0508	23.7947	5	4.9	26.6454	25			0.463996	-0.211754	-0.299948	Q9UBW7	Q9UBW7	Zinc finger MYM-type protein 2	ZMYM2	154.91
24.958	24.662	23.7433	24.2051	24.0989	24.044	23.7855	24.8167	4	12.4	27.6253	22			0.241526	-0.20583	-0.24336	P08621;M0QYR1	P08621;M0QYR1	U1 small nuclear ribonucleoprotein 70 kDa	SNRNP70	51.556
23.7468	23.6077	23.3827	22.8928	23.0144	23.6238	23.7999	23.1213	5	16.4	26.6753	19			0.0225745	-0.017695	-0.0230648	P82933;H7BZC4	P82933	28S ribosomal protein S9, mitochondrial	MRPS9	45.834
27.2765	28.0604	27.3718	27.3419	22.7258	28.1476	28.5162	27.0287	4	30.5	31.0424	19			0.280398	-0.908087	-0.492546	M0R0F0;P46782;M0QZN2;M0R0R2	M0R0F0;P46782;M0QZN2;M0R0R2	40S ribosomal protein S5;40S ribosomal protein S5, N-terminally processed	RPS5	22.391
27.5717	27.7988	27.8039	27.601	27.5872	27.9484	28.1167	27.4253	3	36.3	31.1086	12			0.171319	0.0755701	0.112622	E9PJD9;E9PLL6;P46776;E9PLX7	E9PJD9;E9PLL6;P46776	60S ribosomal protein L27a	RPL27A	10.127
23.4718	23.2091	23.4104	23.523	23.0297	23.2441	23.4928	23.6122	3	10.7	26.7133	15			0.153211	-0.0588932	-0.0910129	O43159;E9PPY3;E9PPP6	O43159;E9PPY3	Ribosomal RNA-processing protein 8	RRP8	50.714
23.3673	22.789	22.8963	21.838	23.3339	23.3704	24.166	24.1504	3	10.1	26.7948	14			1.39446	1.0325	1.15214	Q9Y679	Q9Y679	Ancient ubiquitous protein 1	AUP1	53.028
24.6063	23.9287	24.2849	24.6576	24.9818	24.5236	24.7864	25.3753	3	17	28.0511	14			1.16903	0.54743	0.73375	Q8N0U8	Q8N0U8	Vitamin K epoxide reductase complex subunit 1-like protein 1	VKORC1L1	19.835
22.1898	22.436	20.3328	22.1591	22.0647	22.0302	21.808	22.5742	5	4.4	25.4518	16			0.274204	0.339839	0.335662	Q8NFD5;H0Y7H8;A0A1B0GV63;A0A1B0GWJ2;A0A1B0GTJ8;A0A1B0GVK1;A0A1B0GTI6;A0A1B0GU09;A0A1B0GUC6;A0A1B0GV92;A0A1B0GUG2;A0A1B0GU65;H0Y2R3	Q8NFD5;H0Y7H8;A0A1B0GV63;A0A1B0GWJ2;A0A1B0GTJ8;A0A1B0GVK1;A0A1B0GTI6	AT-rich interactive domain-containing protein 1B	ARID1B	236.12
23.1879	23.0703	23.1357	23.3339	23.4653	23.7266	22.8201	23.1725	3	12.7	26.6355	13			0.226431	0.114214	0.162515	F5H345;P08397;F5GY90;F5H0P4;F5H226	F5H345;P08397;F5GY90	Porphobilinogen deaminase	HMBS	35.761
24.8639	24.4286	24.8443	24.6667	25.8367	25.7672	25.4166	25.4289	3	4.8	28.6656	18			3.05006	0.911507	1.40308	P46977;A0A0C4DH80;E9PN73;E9PI32	P46977;A0A0C4DH80;E9PN73;E9PI32	Dolichyl-diphosphooligosaccharide--protein glycosyltransferase subunit STT3A	STT3A	80.529
24.3426	24.8526	25.1999	25.1763	25.0321	24.9671	24.7622	24.2709	3	16.8	28.1977	22			0.202273	-0.13478	-0.176459	Q15024	Q15024	Exosome complex component RRP42	EXOSC7	31.821
25.549	25.447	24.1712	24.0056	23.8719	24.9459	25.2785	25.2282	3	30	28.2699	20			0.0247375	0.0379524	0.0370572	Q9BUF5;K7ESM5;K7EL29;K7EN98;K7ESQ3;K7EQT3;K7EJ64;K7ERA8;K7EJZ4;K7ES63;K7EPE5	Q9BUF5;K7ESM5;K7EL29	Tubulin beta-6 chain	TUBB6	49.857
24.0273	23.7548	23.9781	23.6752	21.7412	23.5613	23.7099	24.2643	4	7.5	27.109	16			0.434743	-0.539709	-0.512106	E1CEI4;P48506;A0A0C4DGB2;H0YAB6;H0Y9I7	E1CEI4;P48506;A0A0C4DGB2	Glutamate--cysteine ligase catalytic subunit	GCLC	68.629
24.4781	24.0835	23.8904	24.0243	23.8341	24.0984	23.6462	24.5376	3	10	27.4374	22			0.148633	-0.0899677	-0.123103	V9GYD9;Q5VZZ6;A0A0J9YX66;A0A1B0GU44;E9PC62;A0A1B0GUN8;A0A0J9YXJ0;O95319	V9GYD9;Q5VZZ6;A0A0J9YX66;A0A1B0GU44;E9PC62;A0A1B0GUN8;A0A0J9YXJ0;O95319	CUGBP Elav-like family member 2	CELF2	46.621
23.2277	23.4425	23.8359	24.1785	23.9554	24.9896	24.8977	24.2236	3	16	27.647	16			1.37067	0.84545	1.01917	D6RCD0;Q8NBQ5	D6RCD0;Q8NBQ5	Estradiol 17-beta-dehydrogenase 11	HSD17B11	28.102
24.6211	24.5635	24.9657	24.9957	24.8562	24.9686	24.1212	24.9884	3	14.3	28.228	24			0.0812244	-0.0529051	-0.07197	P22087;M0R299;M0QXL5;M0R2U2;M0R1H0;M0R2B0;M0R0P1;M0R2Q4	P22087;M0R299;M0QXL5	rRNA 2-O-methyltransferase fibrillarin	FBL	33.784
27.3052	27.5385	29.1076	27.4589	27.0497	27.7461	28.2083	27.9207	3	21	31.283	28			0.0904991	-0.121337	-0.122822	X1WI28;P27635;B8A6G2;A6QRI9	X1WI28;P27635;B8A6G2;A6QRI9	60S ribosomal protein L10	RPL10	22.975
24.1361	24.4998	24.451	24.2082	24.0644	24.4603	24.4529	24.6818	3	15.6	27.7177	17			0.235504	0.0910802	0.138767	P28074;H0YJM8	P28074	Proteasome subunit beta type-5	PSMB5	28.48
25.3047	24.9019	25.0958	25.4332	26.0863	26.0545	26.0561	25.6876	3	16	29.0908	11			2.70841	0.78721	1.21013	P62851	P62851	40S ribosomal protein S25	RPS25	13.742
22.6485	22.5306	22.3278	22.838	23.1071	23.1246	23.4169	23.7152	3	13.5	26.4135	17			2.25315	0.754735	1.11155	Q8TC12;G3V2G6;G3V234	Q8TC12;G3V2G6;G3V234	Retinol dehydrogenase 11	RDH11	35.386
23.2404	23.9696	22.8706	24.4017	24.1244	24.2226	23.5223	22.7295	3	23	27.1165	18			0.0202819	0.0290971	0.0294561	Q99714;Q5H928	Q99714;Q5H928	3-hydroxyacyl-CoA dehydrogenase type-2	HSD17B10	26.923
24.4535	24.5625	24.8331	24.953	25.5289	25.4992	25.5008	25.6273	3	6.8	28.5735	13			3.37231	0.838535	1.35284	Q9HD45;Q5TB53	Q9HD45;Q5TB53	Transmembrane 9 superfamily member 3	TM9SF3	67.887
22.4619	21.4293	24.3078	23.2403	24.3228	24.2698	24.3637	23.7433	5	18	27.3928	18			1.09528	1.31508	1.16818	Q5EBM0	Q5EBM0	UMP-CMP kinase 2, mitochondrial	CMPK2	49.447
22.4451	22.065	24.045	23.3576	22.742	21.8187	23.3592	22.2977	4	6.4	26.2029	15			0.32448	-0.423777	-0.401862	Q7L8L6	Q7L8L6	FAST kinase domain-containing protein 5	FASTKD5	86.573
23.8963	23.8203	23.5156	23.8647	24.0926	23.4302	23.7238	23.9648	4	6.8	27.1166	9			0.0595902	0.0286584	0.0427636	Q9NVM9;H0YH12;F8VRX9;H0YIA9;F5H457	Q9NVM9;H0YH12	Protein asunder homolog	ASUN	80.224
25.0147	25.2727	25.3785	25.3366	25.9248	26.097	25.6135	25.8301	3	9.4	29.036	18			2.49957	0.615705	0.977809	P53985;Q5T8R5;Q5T8R3	P53985;Q5T8R5	Monocarboxylate transporter 1	SLC16A1	53.944
23.7756	23.9711	24.3333	23.6879	23.8388	23.9043	23.5617	24.3316	4	14.3	27.2772	15			0.0539799	-0.0328498	-0.0459977	C9IYT0;O60832;H7C2Q9;H7C0M1	C9IYT0;O60832;H7C2Q9;H7C0M1	H/ACA ribonucleoprotein complex subunit 4	DKC1	29.722
25.2807	25.7692	25.975	26.1086	26.5102	26.255	26.3809	25.1826	3	15.5	29.3852	19			0.365067	0.298783	0.349718	H0YMZ1;H0YN18;H0YL69;P25789;H0YKT8;H0YMI6;H0YMA1;H0YKS0;H0YLS6;H0YLC2	H0YMZ1;H0YN18;H0YL69;P25789;H0YKT8;H0YMI6;H0YMA1	Proteasome subunit alpha type;Proteasome subunit alpha type-4;Proteasome subunit beta type	PSMA4	24.526
26.7656	26.667	26.7961	26.2226	26.5018	26.1489	26.7934	25.9029	4	28.1	29.7728	27			0.54141	-0.276073	-0.374816	Q5SRQ3;Q5SRQ6;P67870;N0E472;A0A0G2JM12;N0E644;A0A0G2JM58	Q5SRQ3;Q5SRQ6;P67870;N0E472;A0A0G2JM12;N0E644;A0A0G2JM58	Casein kinase II subunit beta	CSNK2B-LY6G5B-1181;CSNK2B;CSNK2B-LY6G5B--991;CSNK2B-LY6G5B-562	26.673
26.5378	26.7529	27.3179	27.2544	26.8421	27.363	26.7029	26.4216	5	28.4	30.3001	12			0.191047	-0.133357	-0.172227	Q32Q12;P22392;E7ERL0;J3KPD9;P15531;C9K028;F6XY72;E5RHP0	Q32Q12;P22392;E7ERL0;J3KPD9;P15531	Nucleoside diphosphate kinase;Nucleoside diphosphate kinase B;Nucleoside diphosphate kinase A	NME1-NME2;NME2;NME1	32.642
23.381	23.1862	23.5818	24.2886	23.6921	24.2845	24.024	23.5731	3	20.6	27.1636	11			0.438262	0.284065	0.359757	E7ETK0;A0A087WUS0;P62847	E7ETK0;A0A087WUS0;P62847	40S ribosomal protein S24	RPS24	15.197
24.1718	23.5559	23.9289	24.6879	23.8319	23.5238	23.2066	23.0507	5	9.7	27.1602	17			1.22792	-0.68288	-0.860154	O95453;H3BRK1;F5H1Z4	O95453;H3BRK1	Poly(A)-specific ribonuclease PARN	PARN	73.45
25.7186	25.467	24.9487	24.966	25.5247	25.0884	24.8597	25.7082	3	26.2	28.7005	25			0.0252851	0.0201573	0.026093	P30086	P30086	Phosphatidylethanolamine-binding protein 1;Hippocampal cholinergic neurostimulating peptide	PEBP1	21.057
24.8044	24.7711	24.9048	24.9376	24.6196	24.6863	25.2767	24.8252	3	5.6	28.1973	13			0.00548708	-0.00251198	-0.00384597	P38432	P38432	Coilin	COIL	62.608
26.044	26.2296	26.0491	25.9145	25.7682	25.3877	25.983	25.7525	3	14.5	29.2273	17			1.28102	-0.336435	-0.526153	P20618	P20618	Proteasome subunit beta type-1	PSMB1	26.489
25.1754	25.3561	24.9694	25.0389	24.7316	24.4399	24.9737	25.8683	3	17.2	28.4222	17			0.157989	-0.131595	-0.160513	P28072;I3L3X7;A0A087X2I4	P28072	Proteasome subunit beta type-6	PSMB6	25.357
25.4976	25.837	25.894	26.184	25.9454	26.2648	26.0674	25.5492	3	22.9	29.3457	16			0.198128	0.103562	0.14661	Q5RI15	Q5RI15	Cytochrome c oxidase protein 20 homolog	COX20	13.291
24.2943	24.6976	24.6313	24.5147	24.5129	24.3699	24.4164	24.098	3	15.1	27.9104	21			0.720206	-0.185182	-0.296064	A0A0C4DFR6;P55735;A8MXL6	A0A0C4DFR6;P55735;A8MXL6	Protein SEC13 homolog	SEC13	35.857
26.7983	26.0696	26.6402	26.4762	25.7476	25.3883	26.1078	25.2083	3	49	29.4175	16			1.88251	-0.883057	-1.1718	F8VYE8;P36873;F8VR82;F8W0W8;A0A087WYY5;H0Y3Y6;F8W0V8;F8WE71;F8W1A0	F8VYE8;P36873;F8VR82;F8W0W8;A0A087WYY5	Serine/threonine-protein phosphatase;Serine/threonine-protein phosphatase PP1-gamma catalytic subunit	PPP1CC	34.95
24.8122	25.2332	24.8217	25.0788	24.818	25.0951	25.026	25.2528	4	8.2	28.3079	12			0.174904	0.061552	0.0966624	P08237;F8VP00	P08237	ATP-dependent 6-phosphofructokinase, muscle type	PFKM	85.182
23.0823	23.3464	23.0206	22.9507	23.1234	23.2894	23.1084	23.4525	3	5.7	26.5059	24			0.56671	0.143393	0.231897	P18858;B4E135;M0R0Q7;F5GZ28	P18858;B4E135;M0R0Q7;F5GZ28	DNA ligase 1;DNA ligase	LIG1	101.73
27.8784	27.8838	28.1061	27.9535	27.4017	27.5102	27.9736	27.5622	4	22.5	31.134	19			1.34869	-0.34354	-0.540245	P62753;A2A3R5;A2A3R7	P62753;A2A3R5;A2A3R7	40S ribosomal protein S6	RPS6	28.68
27.4136	28.1341	27.5307	27.4167	27.9575	28.3722	28.2831	28.5553	3	24.4	31.5232	21			1.69689	0.66827	0.937396	P62979;J3QS39;J3QTR3;F5H6Q2;F5GYU3;F5H2Z3;F5H265;B4DV12;F5H388;F5H747;F5GXK7;J3QKN0;Q5PY61;Q96C32;P62987;P0CG47;P0CG48;J3QSA3;F5GZ39;M0R1V7;M0R1M6;M0R2S1	P62979;J3QS39;J3QTR3;F5H6Q2;F5GYU3;F5H2Z3;F5H265;B4DV12;F5H388;F5H747;F5GXK7;J3QKN0;Q5PY61;Q96C32;P62987;P0CG47;P0CG48	Ubiquitin-40S ribosomal protein S27a;Ubiquitin;40S ribosomal protein S27a;Ubiquitin-60S ribosomal protein L40;Ubiquitin;60S ribosomal protein L40;Polyubiquitin-B;Ubiquitin;Polyubiquitin-C;Ubiquitin	RPS27A;UBB;UBC;UBA52	17.965
24.172	25.0098	23.6947	23.4401	24.4923	23.9224	24.4799	23.7444	3	12.6	27.5664	16			0.0731394	0.0806398	0.0900942	Q14376;Q5QPP1;Q5QPP3;Q5QPP4;Q5QPP9	Q14376;Q5QPP1;Q5QPP3;Q5QPP4	UDP-glucose 4-epimerase	GALE	38.281
25.9123	26.2339	26.3284	26.025	25.844	25.6365	25.7159	25.563	4	8.8	29.2078	18			2.08112	-0.435032	-0.710253	Q16222	Q16222	UDP-N-acetylhexosamine pyrophosphorylase;UDP-N-acetylgalactosamine pyrophosphorylase;UDP-N-acetylglucosamine pyrophosphorylase	UAP1	58.768
23.9822	24.0625	23.9237	24.0105	25.1928	25.0021	24.8151	25.2288	3	9.4	28.0175	18			4.39909	1.06497	1.77561	Q7Z434	Q7Z434	Mitochondrial antiviral-signaling protein	MAVS	56.527
24.1091	24.2884	24.7128	24.4937	24.4681	24.4944	24.0189	23.9753	4	30.9	27.6798	22			0.36636	-0.16182	-0.234063	D6R967;H0Y9D8;Q9H2U2;D6RGV9;A0A0C4DGB9;D6RAD3	D6R967;H0Y9D8;Q9H2U2;D6RGV9	Inorganic pyrophosphatase 2, mitochondrial	PPA2	21.39
26.2345	26.9506	25.7659	26.9424	25.7929	26.869	25.4516	27.1731	6	36.6	29.8254	25			0.11112	-0.151687	-0.150857	P02794;G3V1D1;G3V192;E9PPQ4;E9PRK8;E9PKY7;E9PQR3;E9PKM5;E9PK45	P02794;G3V1D1;G3V192	Ferritin heavy chain;Ferritin heavy chain, N-terminally processed;Ferritin	FTH1	21.225
26.4691	27.0729	26.7069	26.8089	26.8231	26.1584	26.1239	26.2497	4	12.9	29.9234	22			1.07457	-0.425681	-0.603007	Q00796;H0YKB3;H0YLA4	Q00796;H0YKB3	Sorbitol dehydrogenase	SORD	38.324
24.7871	23.126	25.6975	23.3983	24.336	24.2284	25.1759	23.0216	4	15.4	27.8477	13			0.0282902	-0.0617919	-0.0494718	P31350;C9JXC1	P31350;C9JXC1	Ribonucleoside-diphosphate reductase subunit M2	RRM2	44.877
24.5331	23.7435	24.1538	24.959	24.5906	23.6858	25.4413	24.3716	4	11.3	27.8693	14			0.149915	0.174994	0.185067	A0A087X1B2;B9A018;Q53GS9;A0A087WW31	A0A087X1B2;B9A018;Q53GS9	U4/U6.U5 tri-snRNP-associated protein 2	USP39	56.399
24.4659	24.9045	24.9578	24.9212	24.8624	25.1516	24.8311	24.162	4	7.1	28.0957	19			0.0922016	-0.060565	-0.0819114	Q9NR19	Q9NR19	Acetyl-coenzyme A synthetase, cytoplasmic	ACSS2	78.579
24.2721	25.8239	24.9804	24.1793	25.3353	25.4237	24.74	25.2032	4	67.8	28.4023	21			0.384898	0.36162	0.397189	P05387;H0YDD8	P05387;H0YDD8	60S acidic ribosomal protein P2	RPLP2	11.665
24.6546	24.7693	24.6134	24.8352	24.843	24.9673	24.6947	24.5431	4	13.7	28.0704	18			0.160709	0.0438876	0.0725331	Q9Y3F4;H0YH33	Q9Y3F4;H0YH33	Serine-threonine kinase receptor-associated protein	STRAP	38.438
24.8899	24.8367	25.5398	24.8922	24.775	24.6353	24.2838	24.1792	5	19.6	28.1032	25			1.39644	-0.571315	-0.794682	C9JM82;B4DJ62;G3XAH0;Q99719;F8W9E5;E7EQM7;E7EPG2;E7EX32;A0A087WWZ5	C9JM82;B4DJ62;G3XAH0;Q99719;F8W9E5;E7EQM7;E7EPG2;E7EX32	Septin-5	2005-09-01	34.672
23.991	24.0557	23.8254	24.0537	24.8706	23.5007	23.3404	23.2701	5	9.9	27.2381	26			0.252287	-0.236011	-0.267587	Q04759;A0A087X0I9	Q04759;A0A087X0I9	Protein kinase C theta type;Protein kinase C	PRKCQ	81.864
24.1422	23.9401	22.2508	24.5753	24.1898	24.2965	23.6571	24.2068	5	14.3	27.3841	28			0.282509	0.360436	0.349955	O15213;H0Y6G3	O15213	WD repeat-containing protein 46	WDR46	68.07
25.6632	25.5307	25.5723	25.1531	24.8889	24.876	24.6949	25.7137	5	12	28.5646	21			0.864808	-0.436473	-0.578881	H3BPE7;P35637	H3BPE7;P35637	RNA-binding protein FUS	FUS	53.496
26.1603	25.835	25.3511	25.2939	24.9661	25.1738	24.8526	25.0232	5	15.4	28.6498	22			1.63462	-0.656165	-0.915424	B1ANR0;Q13310;H0Y5F5;H0YCC8;H0YEU6	B1ANR0;Q13310;H0Y5F5;H0YCC8	Polyadenylate-binding protein;Polyadenylate-binding protein 4	PABPC4	67.97
24.3678	23.9065	23.7685	23.6681	23.6213	23.341	23.775	23.8241	4	6.2	27.0906	25			0.746488	-0.287362	-0.417054	H0YM23;O75179;H0YLQ3	H0YM23;O75179;H0YLQ3	Ankyrin repeat domain-containing protein 17	ANKRD17	263.25
23.7451	24.2574	24.1716	24.0031	23.9973	23.806	23.5788	23.4666	6	17	27.1821	27			1.0526	-0.33213	-0.500524	Q4G0N4;A0A0C4DGV3;B7Z8V7;D6RHI4	Q4G0N4;A0A0C4DGV3;B7Z8V7;D6RHI4	NAD kinase 2, mitochondrial	NADK2	49.432
25.0164	24.9554	24.8465	24.2977	24.5175	24.2133	24.6023	24.8338	5	11.6	27.9058	30			0.525365	-0.237267	-0.33494	H3BLV9;Q96SB4;H0Y932;D6RBF8	H3BLV9;Q96SB4	SRSF protein kinase 1	SRPK1	76.039
23.2406	23.1071	23.1789	23.3842	22.6518	23.5091	23.0301	23.5493	8	6.4	26.4836	19			0.0686947	-0.0425978	-0.0590581	Q8IZH2;H7C5E4;C9JCZ8	Q8IZH2;H7C5E4	5-3 exoribonuclease 1	XRN1	194.1
23.6989	24.1571	23.8818	23.9301	23.5943	24.0516	23.6491	23.7745	5	7.1	27.1241	17			0.491162	-0.149592	-0.234157	Q7Z392;D6RHE5;D6R9T9	Q7Z392	Trafficking protein particle complex subunit 11	TRAPPC11	128.88
25.6936	25.3679	25.4119	25.6416	25.1386	25.4436	25.5648	25.077	8	14.1	28.6483	28			0.767799	-0.222703	-0.346287	P21980;A2A299	P21980	Protein-glutamine gamma-glutamyltransferase 2	TGM2	77.328
24.3533	23.955	23.461	22.8354	23.044	23.5909	23.5303	23.5062	5	5.1	26.9449	14			0.275144	-0.23335	-0.274254	Q68CP9;F8W108;F8WCU9	Q68CP9;F8W108;F8WCU9	AT-rich interactive domain-containing protein 2	ARID2	197.39
24.3372	23.8104	24.5485	25.0191	24.8449	24.3016	23.8372	23.2402	4	52	27.8088	19			0.384815	-0.372828	-0.403823	C9J4S4;C9J4V0;C9J8S3;P51149;C9J7D1;C9IZZ0;C9J592	C9J4S4;C9J4V0;C9J8S3;P51149;C9J7D1;C9IZZ0;C9J592	Ras-related protein Rab-7a	RAB7A	10.961
21.8435	23.7521	23.7185	22.5466	24.1749	23.5884	23.5991	23.619	4	5.1	27.0605	9			0.791752	0.780203	0.789081	Q6P9B9	Q6P9B9	Integrator complex subunit 5	INTS5	107.99
24.2905	25.6067	24.6561	25.8268	25.6989	25.3902	24.882	25.1802	4	30.4	28.6512	16			0.18517	0.1928	0.212442	Q04760	Q04760	Lactoylglutathione lyase	GLO1	20.777
23.5967	23.2073	22.9804	23.6743	24.0121	23.5861	23.8382	24.0696	4	6.4	27.0324	21			1.39308	0.511827	0.734791	O43747;H3BNR4;H3BR36;H3BUN9	O43747;H3BNR4	AP-1 complex subunit gamma-1	AP1G1	91.35
24.2486	24.1219	24.4957	24.3024	24.21	24.1483	24.2167	23.7969	9	14.6	27.4401	23			0.778279	-0.199153	-0.317857	Q9UHI6;E9PJ60	Q9UHI6	Probable ATP-dependent RNA helicase DDX20	DDX20	92.239
22.3709	22.9648	22.8621	24.3698	23.2084	23.2926	23.327	22.8127	5	5	26.6263	14			0.0138631	0.0182853	0.0193419	Q96QU8;H3BPG8;I3L2K0	Q96QU8	Exportin-6	XPO6	128.88
23.2641	23.3354	23.1523	23.2498	22.7888	22.9988	22.5471	23.0539	4	9.7	26.3944	26			1.7997	-0.403238	-0.649137	F5GZ78;A0A1B0GTU4;P49023;F5H836;A0A1B0GU60	F5GZ78;A0A1B0GTU4;P49023;F5H836;A0A1B0GU60	Paxillin	PXN	64.232
24.7051	24.4855	25.2652	25.6797	24.9929	24.9383	24.0742	24.5333	4	15.3	28.2742	18			0.536737	-0.399227	-0.472724	Q96I51;A0A087WT38	Q96I51	Williams-Beuren syndrome chromosomal region 16 protein	WBSCR16	49.996
24.4053	24.3485	24.1758	24.6449	25.0512	24.3899	24.4342	24.3211	5	16.8	27.8371	10			0.341747	0.155459	0.223748	P61160;F5H6T1;A0A1B0GWD0;A0A1B0GWH0	P61160;F5H6T1	Actin-related protein 2	ACTR2	44.76
26.3214	25.8262	26.5303	27.1703	26.7703	26.5992	26.907	26.5608	5	22.9	29.9548	18			0.37044	0.247277	0.313117	Q96DG6	Q96DG6	Carboxymethylenebutenolidase homolog	CMBL	28.048
24.8454	24.4359	24.5002	24.9736	24.0767	24.6284	24.0253	24.7874	5	9.8	27.857	22			0.63392	-0.30933	-0.422094	Q9UNN5;B1ANM7;B3KT28	Q9UNN5;B1ANM7;B3KT28	FAS-associated factor 1	FAF1	73.953
25.0292	24.78	25.0004	23.8237	24.4679	24.1915	24.2595	24.7737	5	6.4	27.8681	20			0.318594	-0.235125	-0.289409	O15084;B4DIW9	O15084	Serine/threonine-protein phosphatase 6 regulatory ankyrin repeat subunit A	ANKRD28	112.96
22.2149	24.8506	24.9228	25.2819	25.2594	25.1871	24.9158	24.6939	6	20	28.3876	16			0.431698	0.69654	0.571396	Q02790;F5H120;H0YFG2	Q02790	Peptidyl-prolyl cis-trans isomerase FKBP4;Peptidyl-prolyl cis-trans isomerase FKBP4, N-terminally processed	FKBP4	51.804
22.7406	23.1044	23.1879	23.0087	22.9193	22.7616	23.2903	22.5466	8	3.8	26.193	28			0.297283	-0.130942	-0.191319	Q96L91;A0A0A0MR70	Q96L91	E1A-binding protein p400	EP400	343.48
22.4746	22.5602	24.6005	24.3823	24.4735	24.5213	24.7694	24.6755	4	9.7	27.994	12			0.985716	1.10549	1.02747	Q9BVK2;H0YDQ1;E9PP80;H0YDD3;E9PNE2;E9PLP7;E9PP04;E9PK79;E9PP96	Q9BVK2;H0YDQ1;E9PP80;H0YDD3;E9PNE2	Probable dolichyl pyrophosphate Glc1Man9GlcNAc2 alpha-1,3-glucosyltransferase	ALG8	60.087
24.2633	24.8015	23.9979	24.7642	24.0513	21.7615	24.0694	24.4322	5	8.8	27.6964	18			0.656002	-0.87813	-0.768502	O95985;H0Y6W0;C9JKE2;C9JT00;F2Z2A5;H7C4B0;C9JEI7	O95985;H0Y6W0	DNA topoisomerase 3-beta-1;DNA topoisomerase	TOP3B	96.661
24.6267	24.7972	24.6977	24.8791	24.5753	20.9997	24.6202	24.2364	7	13.1	27.7113	25			0.62027	-1.14227	-0.830521	Q13042;Q5T8C6	Q13042;Q5T8C6	Cell division cycle protein 16 homolog	CDC16	71.655
22.9381	22.511	22.5777	23.2486	23.1697	23.1273	23.0538	22.5251	6	3	26.2872	15			0.272535	0.15014	0.206358	Q13535;H0Y8R8;H0Y8Y6;D6RFJ6;H0Y9K2	Q13535	Serine/threonine-protein kinase ATR	ATR	301.36
23.4303	23.2992	23.3696	23.9305	23.7743	23.5292	23.6986	23.0089	7	6.6	26.7946	21			0.00693441	-0.00464296	-0.00640985	Q6P158;A0A087WZ11;H7C109	Q6P158	Putative ATP-dependent RNA helicase DHX57	DHX57	155.6
23.687	23.578	23.8114	23.4102	22.9054	23.3949	23.1468	24.1034	5	9.5	26.8241	24			0.373437	-0.233971	-0.30295	H3BQQ2;Q86UK7;H3BR87	H3BQQ2;Q86UK7	Zinc finger protein 598	ZNF598	93.287
25.6693	25.5687	25.2934	24.5871	25.0162	24.057	24.9914	25.3592	6	23.1	28.5378	31			0.527439	-0.423683	-0.486482	O15355	O15355	Protein phosphatase 1G	PPM1G	59.271
25.7795	25.7103	25.6762	25.6917	25.1658	25.2847	25.3965	25.8958	4	24.5	28.8641	19			0.865865	-0.27876	-0.421055	P63000;P60763;J3KSC4;J3QLK0	P63000;P60763	Ras-related C3 botulinum toxin substrate 1;Ras-related C3 botulinum toxin substrate 3	RAC1;RAC3	21.45
26.0437	25.5484	25.5301	25.7402	25.7113	25.5332	25.8273	25.3603	5	37.7	28.9555	13			0.284685	-0.107577	-0.163703	Q9HB71;B2ZWH1	Q9HB71	Calcyclin-binding protein	CACYBP	26.21
30.5169	30.9783	31.0637	31.129	30.5814	30.6807	30.4853	30.2286	6	21.9	33.9965	49			1.35038	-0.427995	-0.639645	M0QYS1;P40429;Q8J015;Q6NVV1	M0QYS1;P40429;Q8J015;Q6NVV1	60S ribosomal protein L13a;Putative 60S ribosomal protein L13a protein RPL13AP3	RPL13A;RPL13a;RPL13AP3	24.104
24.0823	23.6217	23.7668	23.7198	23.5121	23.52	23.7541	23.6331	5	9	27.0125	15			0.842343	-0.192813	-0.313668	A0A087WWS1;Q96FV9;R4GMN4;A0A087WY84;R4GN58	A0A087WWS1;Q96FV9;R4GMN4	THO complex subunit 1	THOC1	75.651
22.8662	23.0008	23.5285	23.5672	23.2638	23.4086	22.9796	23.1669	4	7.8	26.6186	23			0.0635221	-0.0359373	-0.0512719	Q05655	Q05655	Protein kinase C delta type;Protein kinase C delta type regulatory subunit;Protein kinase C delta type catalytic subunit	PRKCD	77.504
25.8737	25.6207	25.4816	25.5557	25.7294	25.5381	25.5913	26.2599	7	14.5	28.9695	22			0.337658	0.146745	0.213996	G3V1C3;Q9BZZ5;H0YER7;E9PQK6	G3V1C3;Q9BZZ5;H0YER7	Apoptosis inhibitor 5	API5	57.56
22.9872	23.0649	21.9692	22.472	22.5175	22.4021	22.6546	23.2741	5	9.2	26.0954	16			0.101794	0.0887423	0.108178	O60942	O60942	mRNA-capping enzyme;Polynucleotide 5-triphosphatase;mRNA guanylyltransferase	RNGTT	68.556
23.6592	24.0299	23.6279	22.4516	24.0029	23.6214	23.5736	23.9283	5	11.2	27.0936	13			0.419008	0.33944	0.395098	P22307;H0YF61;H0YD06;E9PLD1	P22307;H0YF61	Non-specific lipid-transfer protein	SCP2	58.993
23.8266	23.9389	23.9252	23.4691	24.3655	25.0463	23.7137	23.7981	4	8.7	27.5087	20			0.645701	0.44095	0.533234	O60568;H7C2S8;H7C2V1	O60568;H7C2S8	Procollagen-lysine,2-oxoglutarate 5-dioxygenase 3	PLOD3	84.784
24.3038	24.7407	24.4235	24.692	24.2539	24.1073	23.5321	24.5271	4	9.6	27.648	26			0.945495	-0.434907	-0.591914	P41743	P41743	Protein kinase C iota type	PRKCI	68.262
25.5949	25.4888	25.6886	25.3501	25.456	25.1536	25.3636	26.0613	4	15.2	28.8735	20			0.0365315	-0.0219593	-0.0310203	O76003	O76003	Glutaredoxin-3	GLRX3	37.432
24.3993	24.3071	25.2022	24.768	24.3219	24.3925	24.4604	23.4784	5	13.4	27.8123	19			0.821591	-0.50584	-0.626614	A0A0A0MTR2;Q8N543;H3BR79;H3BUA6	A0A0A0MTR2;Q8N543	Prolyl 3-hydroxylase OGFOD1	OGFOD1	58.378
26.2684	26.0152	26.4326	26.8251	25.8232	26.794	26.652	26.1417	4	26.7	29.7638	32			0.0400709	-0.0325756	-0.041647	F8VWS0;P05388;F8VQY6;F8VRK7;G3V210;F8VU65;Q8NHW5;F8VS58;F8VPE8;F8VZS0;F8W1K8;F8VWV4;F8VW21	F8VWS0;P05388;F8VQY6;F8VRK7;G3V210;F8VU65;Q8NHW5;F8VS58;F8VPE8;F8VZS0	60S acidic ribosomal protein P0;60S acidic ribosomal protein P0-like	RPLP0;RPLP0P6	30.456
26.4377	26.5141	26.9664	25.6692	26.8571	26.0261	27.433	26.5546	4	27.8	29.9955	25			0.345381	0.32082	0.357075	P62081;B5MCP9	P62081;B5MCP9	40S ribosomal protein S7	RPS7	22.127
27.422	26.8078	27.1821	27.1069	26.8787	26.9915	26.6016	26.463	4	30.4	30.1802	20			1.18643	-0.396035	-0.586096	P62280;M0R1H5;M0QZC5	P62280;M0R1H5;M0QZC5	40S ribosomal protein S11	RPS11	18.431
25.632	26.1395	25.9173	25.9126	26.8479	25.4228	25.4137	25.3218	5	18.4	29.2836	30			0.149136	-0.1488	-0.168969	Q92769	Q92769	Histone deacetylase 2	HDAC2	55.364
25.3158	25.2349	25.4606	26.0783	25.7465	25.7669	25.5703	25.8471	7	28.9	28.9894	19			0.4775	0.210302	0.300523	P05198;G3V4T5;H0YJS4	P05198;G3V4T5;H0YJS4	Eukaryotic translation initiation factor 2 subunit 1	EIF2S1	36.112
27.3491	27.5581	27.6631	27.7363	27.5696	27.5467	27.2519	27.4225	5	16.3	30.8744	26			0.536591	-0.128974	-0.210975	F8W6I7;P09651;Q32P51;H0YH80;F8VZ49;F8VYN5;F8VTQ5;F8W646	F8W6I7;P09651;Q32P51;H0YH80;F8VZ49	Heterogeneous nuclear ribonucleoprotein A1;Heterogeneous nuclear ribonucleoprotein A1, N-terminally processed;Heterogeneous nuclear ribonucleoprotein A1-like 2	HNRNPA1;HNRNPA1L2	33.155
26.1279	25.8196	25.5398	25.2262	25.3015	25.5443	25.7082	25.7402	5	14.5	28.9717	33			0.189403	-0.104827	-0.14615	A0A087WY71;E9PFW3;Q96CW1;C9JJ47	A0A087WY71;E9PFW3;Q96CW1;C9JJ47	AP-2 complex subunit mu	AP2M1	49.526
26.202	26.3472	26.8781	26.9158	27.0225	26.9166	27.0207	26.7851	6	21.5	30.1115	31			0.936531	0.350473	0.507413	P57088;D6RAA6;H0Y8N0;J3KN43;D6RBY2	P57088;D6RAA6;H0Y8N0	Transmembrane protein 33	TMEM33	27.978
23.355	22.642	23.9592	23.9077	23.6595	23.7085	23.4055	23.6195	5	11	27.0196	15			0.162309	0.132312	0.162544	Q99543;C9IZ83;H7C3L7	Q99543;C9IZ83;H7C3L7	DnaJ homolog subfamily C member 2;DnaJ homolog subfamily C member 2, N-terminally processed	DNAJC2	71.996
23.5259	23.916	23.8256	24.3993	23.9958	23.6217	24.0859	23.8738	5	4.4	27.2977	17			0.0374525	-0.0224271	-0.0317079	C9JFV4;Q8IZL8;E7EV54;I3L445;I3L4P1;I3L1P4;I3L4M7	C9JFV4;Q8IZL8;E7EV54;I3L445	Proline-, glutamic acid- and leucine-rich protein 1	PELP1	124.94
23.743	24.4673	23.0595	24.182	24.7107	23.8455	23.4156	23.9783	8	20.7	27.3483	20			0.113258	0.124553	0.137179	Q15833;M0R1A1;M0R376;M0R0M7;M0QZ54;R4GMY7;M0R118	Q15833;M0R1A1	Syntaxin-binding protein 2	STXBP2	66.452
26.1904	26.3055	26.5072	26.2613	26.1562	26.3613	26.493	26.0842	8	28.3	29.6223	28			0.138671	-0.0424328	-0.0689048	P28482;E9PBK7;E9PJF0;E9PQW4;P27361	P28482	Mitogen-activated protein kinase 1	MAPK1	41.389
24.489	23.9515	24.3222	23.5972	24.4052	24.0613	24.9274	24.0024	6	21.1	27.6393	19			0.389927	0.259097	0.327584	Q3LIE7;Q15392;H7C4B7	Q3LIE7;Q15392;H7C4B7	Delta(24)-sterol reductase	Nbla03646;DHCR24	49.436
23.4353	23.5984	23.5539	24.5322	23.7682	24.0491	23.7028	23.4406	5	10.1	27.2602	21			0.0493683	-0.0397749	-0.0508462	Q06124;H0YF12	Q06124	Tyrosine-protein phosphatase non-receptor type 11	PTPN11	68.436
24.9285	23.692	23.6047	24.0706	24.1693	25.3966	24.8341	24.594	5	22.2	28.0588	22			0.855487	0.67457	0.752759	Q9NUQ9;E5RJE1;E5RIR8;E5RJL8;E5RI16;A0A087X178;E5RK61;E5RFS4;E5RHU5;E5RGI7	Q9NUQ9	Protein FAM49B	FAM49B	36.748
23.8677	23.7348	23.7624	23.8905	23.1608	23.5135	22.3548	23.6688	6	6.6	26.9486	14			1.13177	-0.639365	-0.803556	Q5T8P6;A0A087X0H9;E2PSN0	Q5T8P6;A0A087X0H9	RNA-binding protein 26	RBM26	113.6
24.7183	25.1481	25.4691	25.6141	25.27	25.3307	24.7373	25.1008	7	12.1	28.5344	38			0.212829	-0.127688	-0.172749	Q9UBF2	Q9UBF2	Coatomer subunit gamma-2	COPG2	97.621
24.469	24.5963	24.9128	24.5046	24.4931	24.311	24.7717	24.4294	7	22.4	27.8303	26			0.368247	-0.11935	-0.18633	Q96HE7;G3V2H0;G3V5B3;G3V3E6;Q5TAE8;Q86YB8	Q96HE7	ERO1-like protein alpha	ERO1L	54.392
24.8732	24.594	24.8223	24.6075	24.733	24.9847	24.5324	24.7818	11	13.6	28.0058	26			0.105779	0.0337305	0.0546187	P52732	P52732	Kinesin-like protein KIF11	KIF11	119.16
26.3405	26.0729	26.4585	26.3031	26.1833	26.1929	25.8365	25.6404	7	23.2	29.4189	38			1.08919	-0.330485	-0.502245	E7ETC2;Q08209;Q5F2F8;P16298;E9PPC8;E9PK68;P48454;H0YB02;Q5F2G0;H0YC26;G3V111	E7ETC2;Q08209;Q5F2F8;P16298	Serine/threonine-protein phosphatase;Serine/threonine-protein phosphatase 2B catalytic subunit alpha isoform;Serine/threonine-protein phosphatase 2B catalytic subunit beta isoform	PPP3CA;PPP3CB	47.815
24.9933	25.0329	25.0868	24.9027	24.74	24.423	24.6476	24.772	5	10.4	28.1679	21			2.18721	-0.358278	-0.609521	Q96HC4;H0Y8Y3;H0YBI4;A0A0A0MSP3	Q96HC4;H0Y8Y3	PDZ and LIM domain protein 5	PDLIM5	63.944
23.7491	23.6416	23.7929	23.2814	23.0077	23.3664	23.5353	23.0203	6	7.1	26.8478	21			1.15148	-0.383838	-0.568782	F5H070;Q9Y4C1;F8WE62;C9JC73;C9J7Q7	F5H070;Q9Y4C1	Lysine-specific demethylase 3A	KDM3A	148.12
24.423	24.7359	24.6646	24.9263	24.7534	24.9669	24.6367	24.1021	5	23.3	28.1081	15			0.129178	-0.0726848	-0.10217	O43809;H3BV41;H3BND3	O43809;H3BV41;H3BND3	Cleavage and polyadenylation specificity factor subunit 5	NUDT21	26.227
24.9007	24.8581	25.1701	25.0222	25.0692	25.1131	25.1327	24.7187	7	31.1	28.4065	14			0.0609754	0.0206552	0.0333142	Q96HS1;F5GXG4	Q96HS1;F5GXG4	Serine/threonine-protein phosphatase PGAM5, mitochondrial	PGAM5	32.004
24.3419	24.5812	24.6406	23.8761	24.3099	24.7185	24.1657	22.0952	11	10.8	27.5485	23			0.383066	-0.537632	-0.483202	Q8IWV8	Q8IWV8	E3 ubiquitin-protein ligase UBR2	UBR2	200.54
23.4163	23.6481	23.0196	22.8089	23.2959	22.8491	23.0949	22.7854	12	3.5	26.4453	19			0.434093	-0.216908	-0.300058	J3KPF0;F8VWT9;Q9Y4D8;F8VU57	J3KPF0;F8VWT9;Q9Y4D8	Probable E3 ubiquitin-protein ligase HECTD4	HECTD4	484.35
24.9575	25.0842	24.8431	24.9229	24.6267	24.4929	24.65	24.0353	7	10.7	27.9767	18			1.78831	-0.500722	-0.768629	Q9P253	Q9P253	Vacuolar protein sorting-associated protein 18 homolog	VPS18	110.18
20.9763	24.779	24.506	24.5109	22.5585	22.9935	22.0458	22.5891	5	12.7	28.659	16			0.579937	-1.14633	-0.802555	Q00013;A8MTH1;C9JB34;C9J9J4	Q00013;A8MTH1;C9JB34;C9J9J4	55 kDa erythrocyte membrane protein	MPP1	52.296
21.9138	22.3057	21.3852	21.2514	21.6674	21.7776	23.1259	22.1318	4	4.7	24.5658	14			0.515729	0.461653	0.50638	A3KN83	A3KN83	Protein strawberry notch homolog 1	SBNO1	154.31
22.0335	21.8336	23.1689	22.9164	22.6223	24.1367	23.7687	25.3297	7	16.3	28.0029	13			1.20414	1.47626	1.28764	Q86X55;K7EQA8;K7EK20;K7EPK1;K7EQB9	Q86X55;K7EQA8	Histone-arginine methyltransferase CARM1	CARM1	65.853
23.1654	22.7991	21.7757	22.5487	23.0045	22.5989	21.6875	22.5393	6	14.5	26.1482	21			0.104585	-0.114671	-0.126873	Q8WVM8;G3V3K9;G3V4I1;G3V363;H0YJS6;G3V5F3;J3KNG4;G3V2M8	Q8WVM8	Sec1 family domain-containing protein 1	SCFD1	72.379
22.7256	22.7817	21.8505	22.9789	22.339	22.867	21.6674	21.9633	4	5.3	25.5908	19			0.471232	-0.375017	-0.435986	Q14687;H0Y613;H7C3B5	Q14687;H0Y613	Genetic suppressor element 1	GSE1	136.16
23.2888	22.7133	23.0841	23.8095	23.6014	23.7256	23.5906	24.1793	4	4.2	26.9338	14			1.06942	0.550281	0.717151	J3KQ96;E7ETY2;Q13428	J3KQ96;E7ETY2;Q13428	Treacle protein	TCOF1	144.12
24.9394	24.2084	23.4434	24.1814	25.3738	25.0368	24.0265	24.3424	7	19.3	27.8999	18			0.534062	0.501735	0.536749	F5H365;Q15436;G3V4V1;G3V1W4;G3V3G5;G3V2R6;G3V5X8;G3V4Q2;G3V5K1	F5H365;Q15436	Protein transport protein Sec23A	SEC23A	82.968
24.0611	23.3815	23.175	23.3077	23.1773	23.4005	23.1685	23.5694	4	9.9	26.7819	13			0.288377	-0.152378	-0.211582	G5EA30;Q92879;E9PSH0;E9PQK4;E9PKU1;E9PKA1;F5H4Y5;F5H0D8	G5EA30;Q92879;E9PSH0;E9PQK4;E9PKU1	CUGBP Elav-like family member 1	CELF1	55.142
25.8943	26.6949	25.9503	24.8902	25.931	26.2404	25.9313	26.917	6	23.8	29.4621	20			0.399676	0.397502	0.424089	P54687;F5H2F2;A0A087WYF2	P54687	Branched-chain-amino-acid aminotransferase, cytosolic	BCAT1	42.966
24.7047	24.4904	24.8661	24.5181	24.4251	24.8954	23.6145	24.5381	6	7.8	27.8154	20			0.433671	-0.276543	-0.352556	Q14692	Q14692	Ribosome biogenesis protein BMS1 homolog	BMS1	145.81
23.4495	23.012	22.6425	23.6127	23.3473	21.2341	22.462	22.0999	8	6.9	27.0891	14			0.928796	-0.893328	-0.90279	J3KN01;P55196;A8MQ02;Q5TIG5;H0Y8L4;H0Y8U8;H0Y948;F8W9I4;E9PFY5	J3KN01;P55196;A8MQ02;Q5TIG5	Afadin	MLLT4	207.62
25.407	25.3009	25.1658	24.4225	24.357	24.8583	24.8602	25.556	5	17	28.3166	24			0.197486	-0.166184	-0.199715	G3XAC6;Q14498;A0A0U1RQH7;H0Y4X3;Q5QP23;A0A0U1RQW2;Q5QP22;F8WF24;F2Z3E6;F2Z2Z5;F8WF73;A8MYG5;G3V5Z6;H0YJJ3;G3XAP0;Q86U06	G3XAC6;Q14498;A0A0U1RQH7;H0Y4X3;Q5QP23	RNA-binding protein 39	RBM39	48.023
24.6099	24.0634	23.6581	23.921	24.3309	23.8727	23.5606	24.6046	7	14.1	27.4167	20			0.0326229	0.0291066	0.0360521	Q8WUA4;A0A087WZD8;H0Y4Q6;H7C318;H7C1A9	Q8WUA4;A0A087WZD8	General transcription factor 3C polypeptide 2	GTF3C2	100.68
25.0375	25.4087	24.8039	25.2704	22.2476	24.5397	24.7581	25.1159	4	24.1	28.1708	22			0.707255	-0.964816	-0.829137	P46109	P46109	Crk-like protein	CRKL	33.777
24.3299	24.5984	24.242	24.5644	24.1815	24.4624	24.3335	24.1223	5	14.9	27.6903	19			0.655124	-0.158742	-0.257572	O95394;A0A087WT27;J3KN95;H0Y8I3;H0Y987;D6RCQ8;D6RF77	O95394;A0A087WT27;J3KN95	Phosphoacetylglucosamine mutase	PGM3	59.851
24.256	24.0799	23.896	23.7998	24.1351	23.9188	23.6622	23.7027	4	7.8	27.2405	8			0.465092	-0.153203	-0.236158	D6RA32;P46821;D6RA40;D6RCL2;D6RGJ3	D6RA32;P46821;D6RA40	Microtubule-associated protein 1B;MAP1B heavy chain;MAP1 light chain LC1	MAP1B	75.026
26.2339	25.5524	25.5347	25.3892	25.583	25.6876	25.6472	26.3756	4	29.6	29.1581	23			0.220646	0.145812	0.190671	Q99497;K7EN27;K7ELW0	Q99497;K7EN27;K7ELW0	Protein deglycase DJ-1	PARK7	19.891
23.5702	23.1587	23.3089	23.1073	23.0195	23.5436	23.1994	23.5844	7	9.2	26.8087	27			0.108742	0.0504684	0.0751544	Q9Y613;H3BVE7	Q9Y613	FH1/FH2 domain-containing protein 1	FHOD1	126.55
23.5997	23.3283	23.1145	23.2485	22.0098	23.052	22.4231	23.962	6	11	26.4206	27			0.47887	-0.460985	-0.49203	O15381;C9J6P7;C9JP83;E7EWK7;E9PH71	O15381	Nuclear valosin-containing protein-like	NVL	95.05
26.2538	26.1193	26.2041	25.6553	25.0157	24.9469	26.0208	25.4403	6	37	29.0928	33			1.32377	-0.702215	-0.897373	O43396;K7ER96;K7EML9;K7EKG2;K7EPB7	O43396;K7ER96;K7EML9	Thioredoxin-like protein 1	TXNL1	32.251
23.5136	23.8019	23.8041	23.8277	23.3949	23.0444	23.6098	23.6007	7	4.8	26.8022	26			1.11542	-0.324389	-0.497585	Q7Z3Z5;Q93074;F8WAE6;Q86YW9	Q7Z3Z5;Q93074	Mediator of RNA polymerase II transcription subunit 12	TNRC11;MED12	226.32
26.3678	25.9981	25.6624	25.7719	25.4977	25.3772	25.1183	25.4371	5	12.8	28.9723	14			1.81323	-0.592517	-0.875542	P49189	P49189	4-trimethylaminobutyraldehyde dehydrogenase	ALDH9A1	53.801
27.5823	26.2944	26.9085	26.2871	26.6927	27.7439	26.0589	27.2077	6	37.6	30.4225	24			0.124652	0.15773	0.161985	Q15365	Q15365	Poly(rC)-binding protein 1	PCBP1	37.497
22.0045	23.6505	24.3307	23.6164	23.994	23.9851	23.514	23.9347	4	10.4	27.1026	18			0.395237	0.456419	0.45334	Q9GZR2;A0A0C4DG22;A0A0C4DG31	Q9GZR2	RNA exonuclease 4	REXO4	46.671
23.8918	23.2869	24.6342	23.8858	24.0313	25.2347	24.2069	23.8874	6	17.5	27.6572	21			0.453929	0.415395	0.455771	Q16795;H3BRM9;F5H0J3;F5GY40	Q16795	NADH dehydrogenase [ubiquinone] 1 alpha subcomplex subunit 9, mitochondrial	NDUFA9	42.509
24.0387	24.3983	25.0707	24.4817	23.7825	24.4123	24.923	23.5516	7	11.6	27.7533	23			0.381667	-0.330017	-0.376214	G5E9A6;P51784	G5E9A6;P51784	Ubiquitin carboxyl-terminal hydrolase;Ubiquitin carboxyl-terminal hydrolase 11	USP11	105.03
25.7017	23.857	25.2605	25.1154	25.2265	25.3387	24.6592	25.0386	5	33.9	28.4349	21			0.0693041	0.0820699	0.0889333	H0YL12;P13804;H0YK49;H0YNX6;H0YLU7;H0YKF0	H0YL12;P13804;H0YK49;H0YNX6;H0YLU7;H0YKF0	Electron transfer flavoprotein subunit alpha, mitochondrial	ETFA	24.797
26.0705	25.793	25.1015	25.3568	25.2257	25.279	25.2079	25.0878	5	15.4	28.6787	21			0.867927	-0.380328	-0.527754	P50453	P50453	Serpin B9	SERPINB9	42.403
25.9988	25.3669	25.2293	24.9301	25.4103	24.7784	25.5534	25.4844	5	18.9	28.8653	25			0.0949326	-0.0746593	-0.0948303	Q9P0L0;J3QKM9	Q9P0L0	Vesicle-associated membrane protein-associated protein A	VAPA	27.893
24.3003	23.741	23.9769	24.1104	23.6321	23.7916	23.5698	24.1372	5	10	27.2892	18			0.699723	-0.24947	-0.370618	A0A0A0MSN7;O60678	A0A0A0MSN7;O60678	Protein arginine N-methyltransferase 3	PRMT3	52.901
23.226	22.6545	23.549	22.8756	22.8785	22.8468	23.0564	23.9322	4	10.4	26.4877	26			0.11809	0.102217	0.124297	B7Z524;H0YDX7;J3QT46;Q9Y450;E9PHZ9;E9PS53;H0YES5	B7Z524;H0YDX7;J3QT46;Q9Y450;E9PHZ9;E9PS53	HBS1-like protein	HBS1L	56.961
28.0886	28.3749	28.4331	28.1793	28.3163	28.2237	27.8872	28.2362	4	19	31.5553	20			0.355739	-0.103105	-0.164983	P26373;J3QSB4;H3BTH3	P26373;J3QSB4	60S ribosomal protein L13	RPL13	24.261
24.7187	24.7578	24.8802	23.8911	24.2176	24.8223	24.6899	25.7453	6	10.1	28.1099	23			0.334264	0.306825	0.344113	Q9Y3T9	Q9Y3T9	Nucleolar complex protein 2 homolog	NOC2L	84.918
22.765	22.6123	22.1879	23.2134	22.3518	22.1411	22.4223	22.6021	7	10.3	26.1477	21			0.651407	-0.315347	-0.43073	A0A087X2D8;O60271;D6RHI8;H0YBS5	A0A087X2D8;O60271	C-Jun-amino-terminal kinase-interacting protein 4	SPAG9	145.17
26.2805	25.9935	25.8025	24.7694	25.429	25.7976	25.4613	25.8127	6	29.1	29.0289	22			0.0910777	-0.0863352	-0.102156	P67775;P62714;H0YC23;H0YBN9;E5RHC1;E5RI56;E5RFI3;E5RHP4;E7ESG8	P67775;P62714;H0YC23	Serine/threonine-protein phosphatase 2A catalytic subunit alpha isoform;Serine/threonine-protein phosphatase 2A catalytic subunit beta isoform	PPP2CA;PPP2CB	35.594
25.1818	24.8627	25.4499	25.5612	25.7055	25.0846	25.9754	26.1607	4	17.8	28.8973	22			0.829086	0.467628	0.598064	Q96C36;A0A087WTV6;A0A087WZR9;J3KR12;A0A087WX69;A0A087WZF0	Q96C36;A0A087WTV6;A0A087WZR9;J3KR12	Pyrroline-5-carboxylate reductase 2;Pyrroline-5-carboxylate reductase	PYCR2	33.637
26.1433	26.1829	25.9236	26.4537	25.6412	25.9232	26.0308	25.7724	6	10.9	29.3115	21			1.28276	-0.333992	-0.5233	P46063;F5H2L2;F8WA66;F8WD97;F5H4P4;F5H3W0	P46063;F5H2L2;F8WA66;F8WD97	ATP-dependent DNA helicase Q1	RECQL	73.457
25.2201	25.5092	25.1233	24.9616	24.7669	25.3703	24.8916	25.6748	7	10.1	28.4849	31			0.0399629	-0.0276794	-0.0373848	O94906	O94906	Pre-mRNA-processing factor 6	PRPF6	106.92
21.9574	24.7896	26.2577	24.22	24.817	24.9323	23.9538	23.8361	6	11.1	28.2171	25			0.02878	0.0786128	0.0546989	Q9UBD5	Q9UBD5	Origin recognition complex subunit 3	ORC3	82.253
24.4184	24.4824	25.4251	24.3137	24.4005	24.2381	24.3782	24.4372	10	10.1	27.8368	28			0.523473	-0.296385	-0.389426	Q96P48;E7EU13;A0A0A0MSJ2;F8WBT0;F5GWN4;F5GWQ2	Q96P48;E7EU13;A0A0A0MSJ2	Arf-GAP with Rho-GAP domain, ANK repeat and PH domain-containing protein 1	ARAP1	162.19
24.8501	24.4311	24.4895	24.5677	23.8395	24.0453	24.1223	24.5633	4	14.2	27.697	17			1.31862	-0.441975	-0.65145	Q9NX58	Q9NX58	Cell growth-regulating nucleolar protein	LYAR	43.614
24.5921	24.1645	23.7143	23.3301	23.5753	23.6294	23.8212	24.0331	5	10.1	27.1367	25			0.25999	-0.18549	-0.234017	Q16512;K7EL10;H0Y429;K7EN76;Q6P5Z2;Q16513	Q16512	Serine/threonine-protein kinase N1	PKN1	103.93
24.2714	24.5741	23.0925	23.4752	23.5602	23.1172	23.7769	23.7116	5	8.4	27.0541	15			0.359865	-0.311825	-0.356672	Q9UDY8	Q9UDY8	Mucosa-associated lymphoid tissue lymphoma translocation protein 1	MALT1	92.271
26.9375	26.7097	26.7329	26.5396	27.1803	27.2793	27.1652	27.8	4	9.6	30.4565	21			1.97906	0.626282	0.933638	Q14739;C9JXK0	Q14739	Lamin-B receptor	LBR	70.702
24.41	24.2156	25.0387	24.4724	24.4135	24.1688	24.4083	24.6768	4	20.9	27.7825	39			0.230702	-0.117345	-0.166439	H0Y449;P67809;C9J5V9	H0Y449;P67809;C9J5V9	Nuclease-sensitive element-binding protein 1	YBX1	41.905
23.8763	24.1124	24.635	24.4866	23.9009	24.3319	24.6065	24.6061	5	14.4	27.7203	21			0.131217	0.0837646	0.11316	Q9NVV4;Q5T851	Q9NVV4	Poly(A) RNA polymerase, mitochondrial	MTPAP	66.171
26.4093	26.5478	26.344	26.3342	26.4824	26.1294	26.2871	26.6033	4	11.9	29.6658	20			0.105992	-0.0332723	-0.0540351	A0A1B0GWJ0;A0A1B0GTJ7;P30566;A0A1B0GTG9;A0A1B0GWF8;A0A0A6YY92;A0A096LNY4;A0A096LNY5;A0A096LNY6;V9GY96;A0A096LP76;B4DEP1;A0A096LP72	A0A1B0GWJ0;A0A1B0GTJ7;P30566;A0A1B0GTG9;A0A1B0GWF8;A0A0A6YY92;A0A096LNY4;A0A096LNY5;A0A096LNY6	Adenylosuccinate lyase	ADSL	54.465
24.8115	24.5292	24.4764	24.5246	24.6213	24.0522	24.3098	24.5168	5	4.2	27.7914	26			0.694294	-0.210391	-0.325208	P54132;H0YNU5;H0YLV8	P54132;H0YNU5	Bloom syndrome protein	BLM	159
23.8376	23.8999	24.7326	23.9182	24.2028	24.2063	23.7956	23.7365	5	10.7	27.4229	17			0.175504	-0.1118	-0.149528	G3V529;Q9GZR7;F5GYL3;A0A087WXU8	G3V529;Q9GZR7;F5GYL3	ATP-dependent RNA helicase DDX24	DDX24	91.48
24.6393	24.4472	23.9973	23.6509	24.5539	24.6799	24.3355	24.0662	6	8.9	27.579	19			0.376631	0.225217	0.296232	P21399	P21399	Cytoplasmic aconitate hydratase	ACO1	98.398
26.1457	26.3924	26.5583	26.4237	26.7515	27.0702	27.2264	26.3928	4	40	30.0103	35			1.249	0.480183	0.682508	P07737;K7EJ44;I3L3D5;CON__P02584	P07737;K7EJ44;I3L3D5	Profilin-1	PFN1	15.054
24.6884	25.0432	25.1864	25.0441	24.609	24.5665	24.7468	24.5138	7	11.9	28.1154	25			1.75871	-0.381518	-0.618013	O15226	O15226	NF-kappa-B-repressing factor	NKRF	77.672
24.2649	25.3063	24.9547	24.5636	23.1307	23.7903	24.2283	24.9544	7	9.4	27.6967	29			0.839566	-0.746461	-0.78966	Q92922;F8WE13	Q92922	SWI/SNF complex subunit SMARCC1	SMARCC1	122.87
23.5728	23.4882	23.9849	23.496	23.4708	23.7144	23.5164	23.4321	4	5.2	26.9593	14			0.324011	-0.10203	-0.161013	O60566	O60566	Mitotic checkpoint serine/threonine-protein kinase BUB1 beta	BUB1B	119.54
24.0905	24.3265	24.3091	24.0452	24.3047	24.1299	23.9748	24.2155	4	7.4	27.6094	13			0.136722	-0.0365982	-0.0608788	A0A087WVC1;Q9BQ39	A0A087WVC1;Q9BQ39	ATP-dependent RNA helicase DDX50	DDX50	82.226
25.2599	25.2904	24.9977	24.8871	24.0498	25.104	24.7048	23.4373	5	14.2	28.1895	19			1.07365	-0.784762	-0.891854	Q9NPH2;J3QS51;J3KRH4	Q9NPH2;J3QS51	Inositol-3-phosphate synthase 1	ISYNA1	61.067
28.9875	28.5723	28.1161	28.4398	27.8724	27.9339	28.1147	28.6274	5	30.1	31.6668	34			0.778842	-0.39177	-0.5232	D3YTB1;F8W727;P62910	D3YTB1;F8W727;P62910	60S ribosomal protein L32	RPL32	15.616
25.2164	25.4034	25.6104	25.7532	25.365	25.0222	24.8728	25.6843	6	10	28.6664	26			0.560879	-0.25981	-0.362733	Q5SY16	Q5SY16	Polynucleotide 5-hydroxyl-kinase NOL9	NOL9	79.322
25.6606	25.1483	24.2452	24.7552	25.2622	24.9218	25.4445	25.1057	5	14.2	28.4706	23			0.303698	0.231239	0.282042	P12955;K7ES25;V9GY89	P12955	Xaa-Pro dipeptidase	PEPD	54.548
24.433	23.9846	24.2483	23.8159	24.2871	24.3966	24.2077	25.1902	4	6.6	27.7727	13			0.74074	0.399977	0.522985	P49756;E9PQU5;H0YE46	P49756;E9PQU5	RNA-binding protein 25	RBM25	100.18
23.4496	23.6243	23.0311	23.5399	23.9055	24.0094	24.3491	24.3575	4	11.5	27.238	21			2.26313	0.744135	1.10142	P50995;H0Y6E1	P50995	Annexin A11	ANXA11	54.389
24.8859	24.7121	24.9016	24.7714	24.7899	25.0729	25.1544	25.0487	4	13	28.3623	19			1.14316	0.198735	0.33621	P50502;H7C3I1;Q3KNR6;Q8NFI4;F6VDH7;Q8IZP2;F8WAQ7	P50502;H7C3I1;Q3KNR6;Q8NFI4;F6VDH7;Q8IZP2	Hsc70-interacting protein;Putative protein FAM10A5;Putative protein FAM10A4	ST13;ST13P5;ST13P4	41.331
23.4743	24.3778	23.5666	23.6111	23.5275	23.6768	23.6512	23.9945	4	7.5	27.0633	18			0.0694372	-0.0449619	-0.0614882	A8MY87;A0A0A0MQW1;Q8IVT5	A8MY87;A0A0A0MQW1;Q8IVT5	Kinase suppressor of Ras 1	KSR1	69.061
26.3306	26.7457	26.4975	26.9299	26.6009	27.1573	26.9141	26.913	4	28.8	30.2495	25			0.762539	0.270385	0.400717	I3L397;I3L504;P63241;F8WCJ1;C9J7B5;C9J4W5;Q9GZV4;Q6IS14	I3L397;I3L504;P63241;F8WCJ1;C9J7B5;C9J4W5;Q9GZV4;Q6IS14	Eukaryotic translation initiation factor 5A;Eukaryotic translation initiation factor 5A-1;Eukaryotic translation initiation factor 5A-2;Eukaryotic translation initiation factor 5A-1-like	EIF5A;EIF5A2;EIF5AL1	16.019
25.9157	25.7078	25.5806	25.8624	25.9179	25.6888	25.8061	26.2786	4	30.4	29.1935	21			0.477308	0.156212	0.240901	Q5T7C4;P09429;B2RPK0	Q5T7C4;P09429;B2RPK0	High mobility group protein B1;Putative high mobility group protein B1-like 1	HMGB1;HMGB1P1	18.311
25.4429	24.4836	24.6926	24.7589	24.9836	24.8508	25.3108	24.7954	4	28.1	28.3093	23			0.239618	0.140625	0.190587	P46778;G3V1B3;M0R181	P46778;G3V1B3;M0R181	60S ribosomal protein L21	RPL21	18.565
25.108	24.8223	24.9803	25.5449	25.0039	25.3703	25.1205	25.6048	5	19.3	28.6565	17			0.335408	0.161011	0.228406	H0YL72;P50213;H0YMU3;H0YLI6;H0YM46;H0YNF5;H0YKD0	H0YL72;P50213;H0YMU3	Isocitrate dehydrogenase [NAD] subunit alpha, mitochondrial	IDH3A	35.786
25.7962	25.7711	26.5412	25.2745	25.8862	25.3181	25.3069	25.4317	4	21	29.0406	24			0.572716	-0.360027	-0.453103	E7EPT4;P19404	E7EPT4;P19404	NADH dehydrogenase [ubiquinone] flavoprotein 2, mitochondrial	NDUFV2	27.907
25.0813	25.0621	24.8731	24.8632	24.4695	24.6939	24.7858	24.9502	5	13.2	28.1569	23			1.09885	-0.245108	-0.397708	E7ETB3;Q9ULA0;E7EMB6;C9JBE1;E7EPX3;B9ZVU2;F8WAN0;E5RJ35;C9JRG3;C9J1E2	E7ETB3;Q9ULA0;E7EMB6;C9JBE1	Aspartyl aminopeptidase	DNPEP	54.502
27.4311	27.9246	28.0485	27.8642	27.7737	28.0137	27.5269	27.211	4	18.3	31.1467	27			0.369762	-0.185795	-0.25876	P14678;J3QLE5;P63162;J3KRY3;S4R3P3	P14678;J3QLE5;P63162	Small nuclear ribonucleoprotein-associated proteins B and B;Small nuclear ribonucleoprotein-associated protein N	SNRPB;SNRPN	24.61
25.1245	25.217	25.5737	25.6005	26.1716	25.413	26.0015	25.3582	5	15.1	29.023	28			0.731219	0.357133	0.48328	J3KQ32;Q9NTK5;C9JTK6;C9JCJ9	J3KQ32;Q9NTK5	Obg-like ATPase 1	OLA1	46.937
27.8017	28.6679	28.6993	28.9849	28.3651	28.6006	28.2954	27.8038	4	36.3	31.835	29			0.38999	-0.272235	-0.337909	E7EPB3;P50914	E7EPB3;P50914	60S ribosomal protein L14	RPL14	14.558
26.8742	26.621	26.6918	26.3779	26.091	25.9608	26.2412	26.5722	5	23	29.7627	29			1.358	-0.424918	-0.637022	J3QT28;O43684;J3QSX4	J3QT28;O43684;J3QSX4	Mitotic checkpoint protein BUB3	BUB3	31.703
24.7498	24.991	24.9649	24.8549	23.9649	24.1392	24.1585	24.4034	5	15.4	27.8545	23			3.3189	-0.72362	-1.19451	M0QWZ7;Q9NP81;M0R2C6;B4DJM9;M0QX29;M0R259;M0R1C0;M0R2H5	M0QWZ7;Q9NP81;M0R2C6;B4DJM9	Serine--tRNA ligase, mitochondrial	SARS2	58.182
25.0848	25.1601	24.9593	25.4435	25.1268	25.3652	24.4243	24.7895	4	23.6	28.3995	23			0.463902	-0.23549	-0.322989	P55795	P55795	Heterogeneous nuclear ribonucleoprotein H2	HNRNPH2	49.263
23.8446	23.1516	23.7	23.4252	23.3611	22.7311	22.4797	21.9801	7	9.3	26.9126	16			1.47279	-0.89235	-1.08099	Q13464;A0A0U1RQV4	Q13464;A0A0U1RQV4	Rho-associated protein kinase 1	ROCK1	158.17
26.1512	25.5415	25.506	25.3719	25.5614	25.0724	25.0622	25.4153	5	10.2	28.7842	21			0.857264	-0.364825	-0.511056	O75131;A0A087WYQ3;H0YB26;E7ENV7;Q96FN4;Q8IYJ1;Q96A23;O95741;Q86YQ8;Q9HCH3;Q9UBL6	O75131	Copine-3	CPNE3	60.13
24.7464	25.1025	24.4554	24.4452	24.674	24.8755	24.9274	24.7958	6	42.5	28.0266	29			0.340163	0.130774	0.196801	O15247;A6PVS0	O15247;A6PVS0	Chloride intracellular channel protein 2	CLIC2	28.356
24.4513	24.5171	24.7305	24.6544	24.5992	24.3301	24.6936	23.5803	7	7.9	27.7644	23			0.506857	-0.28755	-0.378306	P19174;V9GY71;V9GYH5;V9GY63;A0A0D9SEK2	P19174	1-phosphatidylinositol 4,5-bisphosphate phosphodiesterase gamma-1	PLCG1	148.53
26.1567	26.2723	26.7	26.4802	26.0929	26.0056	26.3803	26.2129	6	25	29.6081	37			0.785923	-0.22941	-0.355897	O15143;C9JBJ7;C9K057;C9J4Z7;F8VXW2;C9JEY1;C9JQM8;C9JFG9;C9J6C8;C9JTT6	O15143;C9JBJ7;C9K057;C9J4Z7;F8VXW2;C9JEY1;C9JQM8;C9JFG9;C9J6C8	Actin-related protein 2/3 complex subunit 1B	ARPC1B	40.949
25.3327	24.8524	25.468	25.561	24.55	24.8415	24.7553	24.8209	7	15.1	28.2926	32			1.77658	-0.56162	-0.837005	O43865;H0Y8B3;Q96HN2	O43865;H0Y8B3;Q96HN2	Putative adenosylhomocysteinase 2;Adenosylhomocysteinase;Putative adenosylhomocysteinase 3	AHCYL1;AHCYL2	58.951
27.0866	26.6637	26.8153	26.3476	26.6072	26.6161	26.77	27.2696	7	18.9	30.0523	35			0.152614	0.0874577	0.121607	H3BR35;P15170;H3BSV8	H3BR35;P15170	Eukaryotic peptide chain release factor GTP-binding subunit ERF3A	GSPT1	52.832
24.2938	26.0881	25.7813	24.6499	25.4217	24.5118	25.858	24.0352	7	28.3	28.6074	18			0.157673	-0.246594	-0.224094	E7EU96;P68400;Q8NEV1;A0A087WY74;V9GYA2;V9GY80	E7EU96;P68400;Q8NEV1	Casein kinase II subunit alpha;Casein kinase II subunit alpha 3	CSNK2A1;CSNK2A3	45.31
24.4475	24.3024	24.4675	23.9689	24.2414	24.291	24.4718	24.4391	6	15.9	27.7231	21			0.19801	0.0642648	0.102311	Q86U44;F5H6D8;B4DTN4;B4E349;H0YFV6	Q86U44;F5H6D8;B4DTN4	N6-adenosine-methyltransferase 70 kDa subunit	METTL3	64.473
24.9076	25.3781	24.9073	24.9099	25.1512	25.3734	24.4692	24.4621	7	6.8	28.2867	26			0.25188	-0.16177	-0.212243	Q9Y2A7	Q9Y2A7	Nck-associated protein 1	NCKAP1	128.79
25.0884	24.3726	24.3662	24.5758	24.7585	24.8877	24.2885	24.4551	8	12.5	27.9499	23			0.00507791	-0.00331402	-0.0046142	Q8TCS8	Q8TCS8	Polyribonucleotide nucleotidyltransferase 1, mitochondrial	PNPT1	85.95
26.314	26.6656	26.7407	26.9741	26.7148	26.7024	26.4975	26.3751	5	15.6	29.9833	25			0.259938	-0.101182	-0.153387	B7Z9I1;Q5T4U5;P11310;H0YDT5;E9PRX4;E9PJM9	B7Z9I1;Q5T4U5;P11310	Medium-chain specific acyl-CoA dehydrogenase, mitochondrial	ACADM	42.426
23.4051	23.4643	23.1853	23.8572	23.6532	23.6279	23.4438	23.1321	5	8.7	26.9268	31			0.0254398	-0.0137224	-0.0200496	O00267	O00267	Transcription elongation factor SPT5	SUPT5H	121
22.9141	24.4796	23.461	24.0881	24.4863	24.622	23.976	24.13	7	21.8	27.5035	19			0.739605	0.567861	0.647933	P18031;B4DSN5	P18031;B4DSN5	Tyrosine-protein phosphatase non-receptor type 1;Tyrosine-protein phosphatase non-receptor type	PTPN1	49.966
26.2314	26.1893	26.4989	25.9145	26.1529	26.5326	26.2907	26.0542	6	19.2	29.7099	42			0.115253	0.0490975	0.0745838	K7EQ48;A0A0A0MTS2;P06744;A0A0J9YXP8;A0A0J9YX90;A0A0J9YYH3;K7ENA0;K7EPY4;CON__Q3ZBD7;K7EIL4;K7ERK8;K7ELR7;K7EP41;K7ERC6;K7ESF4	K7EQ48;A0A0A0MTS2;P06744;A0A0J9YXP8;A0A0J9YX90;A0A0J9YYH3	Glucose-6-phosphate isomerase	GPI	53.401
24.8085	25.1097	24.8946	25.2716	24.8627	24.6289	24.6467	25.1817	6	7.7	28.1989	33			0.532587	-0.191093	-0.286942	Q03701	Q03701	CCAAT/enhancer-binding protein zeta	CEBPZ	120.97
27.0687	26.7193	27.1668	26.6644	26.641	26.51	26.5445	27.0967	6	19	30.1236	30			0.515041	-0.206755	-0.30202	Q9UMS4;F5GY56;H0YGF3	Q9UMS4	Pre-mRNA-processing factor 19	PRPF19	55.18
26.9476	26.6245	27.0515	26.3181	26.636	26.5588	26.9987	26.837	5	16.1	30.093	35			0.0398073	0.0222178	0.0320287	P26196;Q8IV96	P26196	Probable ATP-dependent RNA helicase DDX6	DDX6	54.416
24.9961	25.296	24.453	24.6837	24.8108	24.5738	24.5745	24.8916	7	6.7	28.1372	32			0.30158	-0.144525	-0.20614	Q9H3S7;C9JD91;R4GMM7	Q9H3S7	Tyrosine-protein phosphatase non-receptor type 23	PTPN23	178.97
26.5798	26.4876	26.2541	26.4823	26.1174	26.0083	26.0809	26.7876	7	18.6	29.6661	37			0.472646	-0.202412	-0.291696	A0A182DWF2;A0A182DWF3;Q9NNW7;D3YTF8;A0A096LPD9;E7EWK1;A0A096LPK7;A0A0U1RQX0;A0A096LPH4;A0A096LPB7;A0A096LP96	A0A182DWF2;A0A182DWF3;Q9NNW7;D3YTF8;A0A096LPD9;E7EWK1;A0A096LPK7	Thioredoxin reductase 2, mitochondrial	TXNRD2	53.567
26.0172	26.0091	25.8403	26.3651	26.055	25.8298	26.1695	25.744	9	14.2	29.2981	29			0.309034	-0.108365	-0.167301	Q96QK1;I3L4S0;I3L4P4	Q96QK1	Vacuolar protein sorting-associated protein 35	VPS35	91.706
25.7443	21.9907	24.9461	25.7386	25.6704	24.9159	25.2819	24.9825	5	1.5	28.5077	17			0.277263	0.607718	0.431675	E7ERU0;E9PHM6;F6QMI7;F8W9J4;Q03001;A0A0U1RQJ2;Q6P0N6;E7ETB9	E7ERU0;E9PHM6;F6QMI7;F8W9J4;Q03001	Dystonin	DST	615.65
27.021	26.3147	26.5437	25.4226	25.7459	25.6855	25.8179	26.7471	6	28	29.523	33			0.332483	-0.326405	-0.355369	Q99733;C9JZI7;E9PNW0;E9PJJ2;E9PS34;E9PNJ7;E9PP22;A8MXH2;C9J6D1;H0YCI4;E9PKI2;E9PKT8;C9J1B1	Q99733;C9JZI7;E9PNW0;E9PJJ2;E9PS34;E9PNJ7;E9PP22;A8MXH2;C9J6D1;H0YCI4	Nucleosome assembly protein 1-like 4	NAP1L4	42.823
25.6978	25.6712	25.8258	25.49	25.7274	21.631	25.7686	26.1242	11	18.9	28.8439	30			0.345222	-0.858409	-0.547952	Q6PKG0;A0A0B4J210;E5RH50;H0YAN4;H0YC33;Q659C4;H0YAX9;E5RHK4;H0YC73;H0YBW1	Q6PKG0;A0A0B4J210;E5RH50	La-related protein 1	LARP1	123.51
23.2933	23.4396	23.1697	23.5886	23.613	23.7795	24.5991	24.0032	5	8.5	27.176	18			1.43554	0.625855	0.852909	Q9Y487;F5H5F3;Q8TBM3	Q9Y487	V-type proton ATPase 116 kDa subunit a isoform 2	ATP6V0A2	98.081
24.392	25.1285	23.8607	24.8967	24.4043	24.8896	24.3717	24.2142	5	54.1	27.9451	14			0.116615	-0.0995049	-0.121734	A0A0C4DGK8;G3V3C7;G3V5Q1;G3V3M6;P27695;G3V5D9;G3V5M0;G3V359;H7C4A8;G3V3Y6	A0A0C4DGK8;G3V3C7;G3V5Q1;G3V3M6;P27695;G3V5D9;G3V5M0;G3V359;H7C4A8	DNA-(apurinic or apyrimidinic site) lyase;DNA-(apurinic or apyrimidinic site) lyase, mitochondrial	APEX1	15.938
23.6717	23.074	23.5222	23.1737	22.9999	23.3909	23.5854	23.5446	6	3.4	26.7596	19			0.0351692	0.0198026	0.0285145	E7EPN9;Q9Y520;H7C5N8	E7EPN9;Q9Y520	Protein PRRC2C	PRRC2C	308.77
24.2127	24.7022	24.0019	23.8655	24.1294	24.932	24.309	24.0199	7	13.6	27.6598	15			0.222327	0.15196	0.196307	Q99459	Q99459	Cell division cycle 5-like protein	CDC5L	92.25
24.4926	24.0341	24.1296	24.5423	24.6891	23.9467	24.2864	24.0947	5	13.9	27.697	20			0.0797014	-0.0453944	-0.064362	Q15813	Q15813	Tubulin-specific chaperone E	TBCE	59.345
24.563	25.7779	25.5741	25.7528	26.8207	27.2826	27.0516	26.5361	5	11.8	29.8715	28			2.41887	1.5058	1.81527	Q15758;M0QXM4;M0QX44;M0R144	Q15758;M0QXM4	Neutral amino acid transporter B(0);Amino acid transporter	SLC1A5	56.598
25.5783	26.5411	25.5877	26.2267	26.5012	26.3204	26.0917	26.1494	5	49.1	29.5192	27			0.502543	0.282232	0.372786	P30050	P30050	60S ribosomal protein L12	RPL12	17.818
25.309	25.6035	25.0973	25.6827	25.2045	25.7969	24.762	25.0882	8	19.2	28.6118	23			0.355657	-0.210217	-0.27851	P27694;I3L4R8;I3L2M5;I3L524	P27694;I3L4R8	Replication protein A 70 kDa DNA-binding subunit;Replication protein A 70 kDa DNA-binding subunit, N-terminally processed	RPA1	68.137
23.8448	25.1141	24.6013	25.3296	24.7209	25.5153	25.0588	23.3774	7	15.2	28.3282	22			0.0331096	-0.0543861	-0.0510127	Q8N6R0	Q8N6R0	Methyltransferase-like protein 13	METTL13	78.767
24.7593	25.0368	25.2066	25.0723	25.5951	25.6755	25.3856	25.1627	6	30.6	28.647	26			1.58464	0.435945	0.672346	A0A0A0MSW4;P48739;B3KYB6;B3KYB7;I3L3W1;I3L2X8;I3L471;I3L4C0;I3L4U7;I3L459;I3L4H1;F5GWE5;Q00169	A0A0A0MSW4;P48739;B3KYB6;B3KYB7	Phosphatidylinositol transfer protein beta isoform	PITPNB	31.581
24.7874	25.1911	25.1833	24.3741	24.8526	24.49	24.3604	24.6526	8	13.6	28.0846	32			0.636065	-0.295099	-0.408997	Q9H270	Q9H270	Vacuolar protein sorting-associated protein 11 homolog	VPS11	107.84
26.7378	26.7157	26.7387	26.8201	26.7927	27.456	27.1371	26.4693	5	28.1	30.2601	32			0.438962	0.21073	0.29491	G3V295;G3V5Z7;P60900;G3V3I1;G3V3U4	G3V295;G3V5Z7;P60900;G3V3I1;G3V3U4	Proteasome subunit alpha type;Proteasome subunit alpha type-6	PSMA6	22.842
26.3015	27.0352	27.0209	27.2967	26.4272	26.7643	27.1131	26.2469	7	22.2	30.072	29			0.427755	-0.275708	-0.350431	Q13547;Q5TEE2	Q13547	Histone deacetylase 1	HDAC1	55.102
24.3955	24.6798	25.5774	25.0231	26.0115	25.0191	24.5385	25.3213	5	6.1	28.63	27			0.322213	0.30366	0.337514	Q86XI2;H0Y6U5;F8WE06	Q86XI2;H0Y6U5	Condensin-2 complex subunit G2	NCAPG2	130.96
26.3759	26.2555	26.8303	26.2159	25.9865	26.0928	26.5493	25.7504	5	18	29.5946	22			0.723914	-0.324673	-0.451519	P31153	P31153	S-adenosylmethionine synthase isoform type-2	MAT2A	43.66
25.0047	26.3221	25.2317	25.1336	26.0697	25.8131	25.7009	25.475	6	17.8	28.9818	33			0.472392	0.341697	0.412929	P30520	P30520	Adenylosuccinate synthetase isozyme 2	ADSS	50.097
24.3383	25.9053	25.1898	25.4155	25.9527	25.6686	25.7281	24.7745	6	7.1	28.9085	32			0.323965	0.318787	0.347374	Q96KP1	Q96KP1	Exocyst complex component 2	EXOC2	104.07
26.3697	26.047	25.5059	26.8024	25.9289	25.9146	25.7126	25.3213	5	39.2	29.3784	27			0.73528	-0.461907	-0.571898	P23528;G3V1A4;E9PP50;E9PK25;E9PLJ3;E9PS23;E9PQB7;Q9Y281	P23528;G3V1A4;E9PP50;E9PK25;E9PLJ3;E9PS23;E9PQB7	Cofilin-1	CFL1	18.502
25.512	25.6222	25.775	25.6561	26.1308	25.8983	25.424	25.3782	6	22.9	29.0649	28			0.130663	0.0664878	0.0961629	Q9Y295	Q9Y295	Developmentally-regulated GTP-binding protein 1	DRG1	40.542
27.3506	27.4565	27.5715	27.2214	27.3954	27.4736	27.5964	27.1223	6	46.8	30.8797	38			0.00822762	-0.0030694	-0.0049096	H0YEU2;E9PL09;P23396;E9PPU1;E9PSF4;E9PQ96;E9PJH4;F2Z2S8;H0YF32;E9PK82;H0YCJ7;H0YES8;E9PQX2	H0YEU2;E9PL09;P23396;E9PPU1;E9PSF4	40S ribosomal protein S3	RPS3	18.56
24.6208	24.8464	25.171	25.3507	25.1851	25.1544	25.1281	24.4468	6	31.5	28.3724	26			0.0264073	-0.0186124	-0.0251103	F5GYN4;J3KR44;Q96FW1;F5H6Q1;F5GYJ8;F5H3F0	F5GYN4;J3KR44;Q96FW1;F5H6Q1;F5GYJ8;F5H3F0	Ubiquitin thioesterase OTUB1	OTUB1	28.05
26.3126	26.6472	27.3348	27.418	27.2807	27.2948	27.2304	26.3537	5	25	30.4415	34			0.11796	0.11175	0.131042	O14818;H0Y586;A0A087WYS6;Q8TAA3	O14818;H0Y586;A0A087WYS6;Q8TAA3	Proteasome subunit alpha type-7;Proteasome subunit alpha type-7-like	PSMA7;PSMA8	27.887
26.2641	26.1296	26.8641	26.2365	26.082	25.9621	26.1326	25.9696	7	26.2	29.5822	34			1.01443	-0.337012	-0.502014	Q9UHD1;E9PPQ5;E9PIZ4;E9PSD5;E9PL00;E9PHZ2	Q9UHD1;E9PPQ5;E9PIZ4;E9PSD5	Cysteine and histidine-rich domain-containing protein 1	CHORDC1	37.489
27.5896	27.816	27.5963	27.5699	27.2795	27.4351	26.9793	27.0717	6	16.5	30.7478	30			2.0628	-0.451521	-0.730765	Q09028;H0YF10;H0YEU5;H0YCT5;H0YDK2;E9PNS2;E9PIC4;E9PNS6;Q5JP02;Q5JNZ6	Q09028;H0YF10;H0YEU5;H0YCT5;H0YDK2	Histone-binding protein RBBP4	RBBP4	47.655
27.2893	27.8848	28.1	27.8565	27.5981	27.6983	27.3106	27.03	6	22.1	30.8976	31			0.809487	-0.373386	-0.511748	P38919;J3QL52;J3QQP0;E9PBH4;F8WE11;I3L3H2	P38919	Eukaryotic initiation factor 4A-III;Eukaryotic initiation factor 4A-III, N-terminally processed	EIF4A3	46.871
25.2052	25.8905	25.6803	25.173	26.0155	25.8223	26.0154	25.6182	8	27.8	29.1161	25			0.968488	0.380592	0.54271	P62195;J3QSA9;J3QLH6;J3KRP2;J3QQM1;J3QRW1;J3QSE0;J3QRR3	P62195;J3QSA9;J3QLH6;J3KRP2;J3QQM1	26S protease regulatory subunit 8	PSMC5	45.626
25.7816	25.8627	26.1108	26.0493	26.0798	25.9701	26.1998	25.4261	10	18.7	29.242	47			0.0606918	-0.0321326	-0.046737	P22059;H0YCV6;H7C1R2;H7C368;H7C428;A0A0A0MSB4;Q6ZN50;Q969R2	P22059	Oxysterol-binding protein 1	OSBP	89.42
26.0639	25.5066	26.6663	24.9712	25.8267	25.6162	26.2096	25.8303	8	19.8	29.2623	16			0.06342	0.0687127	0.0776647	P52292;J3QLL0;J3KS65	P52292	Importin subunit alpha-1	KPNA2	57.861
24.2271	25.3582	24.2738	25.2401	24.5058	24.8932	23.9908	25.215	7	17.6	28.0919	24			0.114064	-0.123597	-0.136991	Q9UFC0;H7C5S6;F8WDB4	Q9UFC0;H7C5S6	Leucine-rich repeat and WD repeat-containing protein 1	LRWD1	70.86
27.9372	27.8952	28.4556	27.9201	28.371	28.1996	28.213	27.7985	7	37.4	31.4579	34			0.203839	0.0935221	0.137163	E9PQD7;P15880;H0YEN5;E9PMM9;E9PPT0;I3L404;H3BNG3;H0YE27;E9PM36	E9PQD7;P15880;H0YEN5;E9PMM9	40S ribosomal protein S2	RPS2	25.211
24.5934	24.4748	24.8573	24.683	25.2695	25.0073	24.8453	24.3752	9	19.4	28.0931	31			0.496228	0.222163	0.315355	Q12996;E9PLP8;E9PJ06;H0YE74	Q12996	Cleavage stimulation factor subunit 3	CSTF3	82.921
24.0691	24.6426	24.1146	24.6983	24.0418	24.6025	24.4777	24.1997	10	9.2	27.6958	26			0.0872351	-0.0506883	-0.0713068	Q96K76	Q96K76	Ubiquitin carboxyl-terminal hydrolase 47	USP47	157.31
24.7141	25.5886	25.0499	25.7975	25.2529	25.5425	25.4846	24.7461	7	25.4	28.686	36			0.0349218	-0.0310402	-0.0384677	O96019;H7C5S0;C9JQT2;O94805	O96019;H7C5S0	Actin-like protein 6A	ACTL6A	47.46
24.0021	24.6902	24.4937	24.6364	24.8447	24.6569	24.6581	24.5902	9	10.3	27.899	36			0.673503	0.231857	0.348111	Q8IX12;F5H1H2;F5H2E6;A0A0C4DGG8;F5H3E1;H0YFJ7	Q8IX12;F5H1H2;F5H2E6;A0A0C4DGG8;F5H3E1	Cell division cycle and apoptosis regulator protein 1	CCAR1	132.82
24.8899	25.0458	25.6025	25.1354	25.487	25.3353	25.3518	24.6571	6	27.9	28.5506	28			0.0575767	0.0393891	0.0531147	A0A024QZP7;P06493;E5RIU6;A0A087WZZ9;G3V317;K7ELV5	A0A024QZP7;P06493;E5RIU6;A0A087WZZ9	Cyclin-dependent kinase 1	CDC2;CDK1	34.081
24.0727	24.2179	23.8978	24.3389	24.2823	24.3906	23.647	23.4247	6	7	27.3618	20			0.326083	-0.195645	-0.259147	O15397;F5H244	O15397	Importin-8	IPO8	119.94
23.1387	23.9653	24.6636	23.6808	24.0053	23.5738	24.7214	23.9987	9	3.2	27.4402	19			0.213848	0.212708	0.237198	Q8IZT6;Q5VYL4;A0A087WV76	Q8IZT6;Q5VYL4	Abnormal spindle-like microcephaly-associated protein	ASPM	409.8
25.435	25.2699	25.2223	24.8897	25.1203	24.9605	25.2584	25.5641	6	14.1	28.5722	33			0.0438122	0.0215926	0.0321455	D6RGI3;D6RER5;Q9NVA2;H0Y961;H0Y9G8;D6RDU5;D6RDP1;C9JV02;D6R9Y6	D6RGI3;D6RER5;Q9NVA2;H0Y961;H0Y9G8;D6RDU5	Septin-11	2011-09-01	49.005
26.0305	25.2809	25.187	25.2086	26.241	25.8958	25.5931	25.7582	6	11.9	29.086	24			0.925991	0.445334	0.598041	Q14694;H3BQP1;H3BQC6;H3BNA1;J3KT19	Q14694	Ubiquitin carboxyl-terminal hydrolase 10	USP10	87.133
26.6113	27.3461	26.7733	26.9226	26.8954	26.9608	26.8939	25.5593	7	39.4	30.1655	25			0.393434	-0.336013	-0.384229	P28066	P28066	Proteasome subunit alpha type-5	PSMA5	26.411
26.5159	26.489	26.8174	26.5756	26.53	26.5579	26.5067	26.656	6	8.6	29.9316	36			0.175042	-0.0368094	-0.0632751	O00139;D6R9M0;H0Y8H2	O00139	Kinesin-like protein KIF2A	KIF2A	79.954
25.3506	25.4935	24.9617	25.324	25.1551	25.2497	24.822	25.5192	10	11.3	28.5272	32			0.208203	-0.0959201	-0.140419	Q8N3U4;B1AMT4;Q8WVM7;Q68DW7;B1AMT2;B1AMT3;B1AMT0;B1AMT1;C9JJQ0	Q8N3U4;B1AMT4;Q8WVM7	Cohesin subunit SA-2;Cohesin subunit SA-1	STAG2;STAG1	141.32
24.8752	25.0263	25.1235	24.8935	24.7603	24.2216	24.7097	25.0499	17	4.7	28.1	48			0.806595	-0.294262	-0.431781	O95714;A0A0J9YVP0;A0A0J9YXQ8;H3BUQ1;A0A0G2JPS8;Q9BVR0	O95714;A0A0J9YVP0	E3 ubiquitin-protein ligase HERC2	HERC2	527.22
25.2363	24.8065	24.8836	24.7525	24.7911	24.2705	24.4108	24.9106	5	13.3	28.1607	14			0.873227	-0.32397	-0.471572	Q15796;B7Z5N5;H0YMP2;H0YL71;H3BP09;H3BVD1;K7EJX0;P84022;O15198	Q15796;B7Z5N5;H0YMP2;H0YL71;H3BP09;H3BVD1;K7EJX0;P84022	Mothers against decapentaplegic homolog 2;Mothers against decapentaplegic homolog;Mothers against decapentaplegic homolog 3	SMAD2;SMAD3	52.306
25.6191	24.3554	25.6169	25.0794	24.8376	26.5534	25.6261	25.84	6	36.5	28.9772	18			0.549387	0.546565	0.567718	C9J9K3;A0A0C4DG17;P08865;F8WD59	C9J9K3;A0A0C4DG17;P08865;F8WD59	40S ribosomal protein SA	RPSA	29.404
22.0868	24.1552	23.6471	23.8214	24.6605	24.4241	25.2898	24.9894	7	10	27.8355	18			1.53234	1.41331	1.41802	P78316;E9PFK5	P78316;E9PFK5	Nucleolar protein 14	NOP14	97.667
24.3146	24.3882	24.006	24.1231	23.5219	23.9984	24.1083	23.7222	10	3.1	27.2562	30			1.2297	-0.370247	-0.561708	O75592;H7C3U4;A0A0C4DGY7	O75592	E3 ubiquitin-protein ligase MYCBP2	MYCBP2	510.08
24.3779	24.6042	24.0918	24.868	24.8478	24.5085	24.6282	24.4107	5	9.9	27.9034	27			0.242119	0.11336	0.164281	Q96EY7;F8WE76;B8ZZQ4	Q96EY7	Pentatricopeptide repeat domain-containing protein 3, mitochondrial	PTCD3	78.549
25.1942	25.258	25.32	25.4397	25.3927	25.378	25.3729	25.2336	5	17.8	28.7459	31			0.265073	0.0413451	0.0732859	E9PF19;Q9Y4P3;Q96E41;A0A087WXC6	E9PF19;Q9Y4P3;Q96E41	Transducin beta-like protein 2	TBL2	45.935
25.186	24.821	24.2426	24.082	24.0536	23.7431	24.758	25.2064	6	17.6	27.8362	22			0.127596	-0.142605	-0.155107	P41214;Q5SY38;A0A087X1L6	P41214	Eukaryotic translation initiation factor 2D	EIF2D	64.706
24.079	24.3943	24.6009	24.2368	25.2057	24.4424	24.3651	24.2604	6	7.9	27.9807	23			0.443847	0.240653	0.323982	Q92896;H3BM42;H3BRD8;H3BQU9	Q92896;H3BM42	Golgi apparatus protein 1	GLG1	134.55
25.3724	26.2786	25.491	25.8111	26.2139	25.8055	25.777	24.5647	5	14.4	29.0368	24			0.136473	-0.147972	-0.162661	P11172;F2Z3P2;F2Z303;F8WDG4;E9PFD2	P11172	Uridine 5-monophosphate synthase;Orotate phosphoribosyltransferase;Orotidine 5-phosphate decarboxylase	UMPS	52.221
25.8175	25.7099	25.529	24.9629	25.2618	25.0903	24.7393	25.2442	6	20	28.5746	38			0.95385	-0.420907	-0.58016	Q9BR76;F5H0D2;A0A087WW53;F5H390	Q9BR76	Coronin-1B	CORO1B	54.234
24.9182	24.7231	24.7782	24.7046	24.4924	24.2314	24.7772	24.8589	8	9.7	28.0021	28			0.597608	-0.19106	-0.293503	Q9Y6Y8;H7C0V8;H7C4C4;A0A0C4DH82	Q9Y6Y8	SEC23-interacting protein	SEC23IP	111.08
25.2714	25.9158	25.0658	26.2598	25.8949	25.2791	25.1029	25.7763	6	17.6	28.8891	24			0.127912	-0.114862	-0.137222	P07954	P07954	Fumarate hydratase, mitochondrial	FH	54.636
27.0623	27.53	28.2155	27.7134	27.5169	27.6178	27.3605	26.8534	5	40.2	30.8929	14			0.449596	-0.293159	-0.369847	A0A087WXM6;J3QQT2;J3KRX5;A0A0A6YYL6;P18621;J3QLC8;A0A0A0MRF8;J3KRB3;A0A087WWH0;J3QS96;A0A087WY81;J3KSJ0	A0A087WXM6;J3QQT2;J3KRX5;A0A0A6YYL6;P18621;J3QLC8;A0A0A0MRF8;J3KRB3;A0A087WWH0;J3QS96	60S ribosomal protein L17	RPL17;RPL17-C18orf32	19.586
23.8132	23.4565	21.1913	23.2749	23.358	23.2794	23.7828	23.262	8	4.9	26.9313	15			0.345496	0.486532	0.440652	F1T0I1;J3KNL6;O15027;X6RGP5;Q8N9G1;A0A0C4DH09	F1T0I1;J3KNL6;O15027;X6RGP5	Protein transport protein Sec16A	SEC16A	249.48
24.0272	24.067	24.3903	24.3068	23.6789	23.6031	24.082	24.1803	6	16.7	27.3399	14			0.940329	-0.311813	-0.466026	Q9Y6I4;H0YLB7;H0YKU8;Q6JHV3;H0YMI4;H0YLG0;H0YLJ0;H0YNK1;H0YMW1;H0YM72;H0YL81;H0YMP6	Q9Y6I4;H0YLB7;H0YKU8;Q6JHV3;H0YMI4	Ubiquitin carboxyl-terminal hydrolase 3;Ubiquitin carboxyl-terminal hydrolase	USP3	58.896
24.6065	24.4355	24.659	25.2596	24.7112	24.7244	24.5562	24.2536	7	26.6	27.9924	24			0.368655	-0.178807	-0.251718	Q8TBC4;F8W8D4;F8WF86	Q8TBC4;F8W8D4	NEDD8-activating enzyme E1 catalytic subunit	UBA3	51.852
25.2108	25.1882	25.0759	24.8345	24.6827	25.8128	25.4843	25.4314	6	13	28.5892	29			0.495523	0.275458	0.365409	B0YIW6;P48444;Q6P1Q5;E9PK34	B0YIW6;P48444;Q6P1Q5	Coatomer subunit delta	ARCN1	61.626
26.7038	25.1061	26.3041	25.0021	26.584	25.963	26.2264	26.6602	7	58.5	29.5227	28			0.599316	0.579392	0.6056	P04792;F8WE04;C9J3N8	P04792;F8WE04	Heat shock protein beta-1	HSPB1	22.782
24.4578	24.8258	23.9679	23.9806	21.9543	24.4723	24.2828	24.2146	8	12.3	27.5388	28			0.4036	-0.57702	-0.510776	P57740	P57740	Nuclear pore complex protein Nup107	NUP107	106.37
24.9011	24.2336	26.4038	25.7049	25.7289	25.0026	26.4168	26.2539	5	13	29.1089	16			0.420114	0.53969	0.5045	Q9BW27;J3QL54;J3KT10;J3QLV0;J3QLD4;J3KS87;J3KSH3;J3KRC0;F5H0W7;J3QLH0	Q9BW27;J3QL54;J3KT10;J3QLV0;J3QLD4	Nuclear pore complex protein Nup85	NUP85	75.019
25.613	25.5863	25.5434	25.7261	25.1078	25.5575	25.4078	25.2253	5	17.4	28.8021	27			1.47506	-0.292588	-0.482364	P06132;H0Y5R6;A0A1B0GVN9;A0A1B0GVZ4;Q5T446	P06132;H0Y5R6;A0A1B0GVN9;A0A1B0GVZ4	Uroporphyrinogen decarboxylase	UROD	40.786
24.9154	23.8583	24.3382	23.9378	23.4135	23.7811	23.5598	24.7241	9	11.6	27.3622	27			0.465465	-0.39282	-0.44583	Q7Z2Z2	Q7Z2Z2	Elongation factor Tu GTP-binding domain-containing protein 1	EFTUD1	125.43
24.8316	24.6391	24.2022	25.0568	24.8875	24.3119	24.7724	24.3614	6	5	27.9942	24			0.164804	-0.0991001	-0.135375	Q69YN4;H0YBN5;H0YB68	Q69YN4	Protein virilizer homolog	KIAA1429	202.02
23.1115	23.5925	23.6328	23.3859	23.3777	23.0667	23.175	23.3015	7	11.1	26.7362	21			0.708345	-0.200445	-0.314325	Q9H2P0;E9PQK8	Q9H2P0	Activity-dependent neuroprotector homeobox protein	ADNP	123.56
24.1494	24.0088	23.5309	24.1334	23.9788	23.3586	24.4369	24.517	9	12.8	27.31	19			0.14737	0.11717	0.145931	Q9C0C9;K7ES11;K7EQ12	Q9C0C9;K7ES11	E2/E3 hybrid ubiquitin-protein ligase UBE2O	UBE2O	141.29
26.3963	25.8633	25.8589	25.5196	25.4022	25.2584	25.3899	25.9013	6	13.3	29.0043	19			0.93417	-0.421567	-0.577583	Q10713;Q5SXN9	Q10713;Q5SXN9	Mitochondrial-processing peptidase subunit alpha	PMPCA	58.252
24.1815	23.5206	23.4934	23.8282	24.0903	24.1712	23.5337	23.9527	8	7.1	27.2239	28			0.365666	0.181062	0.25343	Q9NRL2;A0A087WWN7	Q9NRL2	Bromodomain adjacent to zinc finger domain protein 1A	BAZ1A	178.7
25.9377	25.5678	26.055	26.419	26.9	26.3787	27.0081	26.1757	8	20.9	29.7923	31			1.23011	0.62071	0.809561	E7EWE5;P51659;G5E9S2;E7ET17;E7ER27;E7EPL9	E7EWE5;P51659;G5E9S2;E7ET17;E7ER27;E7EPL9	Peroxisomal multifunctional enzyme type 2;(3R)-hydroxyacyl-CoA dehydrogenase;Enoyl-CoA hydratase 2	HSD17B4	77.586
25.358	25.0937	25.0317	25.3692	25.9792	25.8348	25.6744	26.1104	6	15.5	29.0316	32			2.75485	0.686515	1.09227	P04844;Q5JYR4;Q5JYR7;Q5JYR3;H0Y5M1;F2Z3K5	P04844;Q5JYR4;Q5JYR7	Dolichyl-diphosphooligosaccharide--protein glycosyltransferase subunit 2	RPN2	69.283
23.9604	23.432	23.6181	22.6137	23.7901	23.4385	23.4549	23.8355	6	4.7	26.92	26			0.308989	0.223668	0.277868	O00443;A0A0C4DGF9	O00443	Phosphatidylinositol 4-phosphate 3-kinase C2 domain-containing subunit alpha	PIK3C2A	190.68
26.3755	25.4266	26.1288	25.7712	25.4505	25.6676	25.376	25.4678	8	24.7	29.0809	24			1.03914	-0.435017	-0.607041	Q15008;C9J0E9;H7C531;C9J7B7	Q15008	26S proteasome non-ATPase regulatory subunit 6	PSMD6	45.531
25.7691	24.5863	25.8541	26.1198	25.596	26.8415	25.3408	26.2826	7	14.6	29.2805	29			0.395067	0.43288	0.441343	O00567;H0YDU4;Q5JXT2;H0Y653	O00567;H0YDU4;Q5JXT2	Nucleolar protein 56	NOP56	66.049
24.9977	25.1974	25.1161	24.7342	24.9937	24.7966	24.7515	24.9195	7	8.6	28.2761	31			0.597795	-0.146028	-0.237308	Q9HC35;B5MBZ0	Q9HC35;B5MBZ0	Echinoderm microtubule-associated protein-like 4	EML4	108.91
26.0525	26.353	26.9428	25.7507	25.9354	25.9178	25.7597	25.9177	7	9.7	29.5828	40			0.747395	-0.39211	-0.517519	Q6P3X3;F8WCH1;H7C3A3	Q6P3X3	Tetratricopeptide repeat protein 27	TTC27	96.631
25.3171	26.1788	26.0478	25.6462	25.3896	25.2911	25.697	25.2344	9	9.6	28.9261	32			0.901866	-0.394458	-0.546652	Q9H9Y6;H7C0D9;F8WDS4;F8WAK7;F8WBB9;F8WCS3;C9JJG2;C9JS83	Q9H9Y6	DNA-directed RNA polymerase I subunit RPA2	POLR1B	128.23
25.3405	25.5564	25.9222	25.396	25.4367	25.59	25.534	25.3272	7	8.8	28.8814	30			0.230217	-0.08181	-0.127191	Q14CX7	Q14CX7	N-alpha-acetyltransferase 25, NatB auxiliary subunit	NAA25	112.29
25.1457	25.3086	25.2954	25.7883	25.5422	25.8814	25.1948	25.9296	5	10.7	28.7941	26			0.528922	0.252501	0.350431	O76094;D6RDY6;R4GNC1	O76094;D6RDY6	Signal recognition particle subunit SRP72	SRP72	74.605
24.9367	24.9116	25.4357	24.5404	24.9912	24.7903	24.8292	24.5946	5	12.8	28.2513	26			0.327448	-0.15479	-0.220809	Q8IXI1;H3BST5;I3L2C6;H3BUX4;H3BMP9;H3BVI5;H3BU27	Q8IXI1;H3BST5;I3L2C6	Mitochondrial Rho GTPase 2	RHOT2	68.117
26.5189	26.9923	26.909	27.0799	26.4687	26.6376	26.4271	26.4782	6	23.9	30.0305	24			1.51628	-0.372102	-0.5887	P61247;H0Y9Y4;D6RG13;D6RAT0;D6R9B6;D6RB09;H0Y8L7;E9PFI5;D6RAS7;D6RI02;D6RED7	P61247;H0Y9Y4;D6RG13;D6RAT0;D6R9B6;D6RB09;H0Y8L7;E9PFI5	40S ribosomal protein S3a	RPS3A	29.945
24.3712	24.2908	24.652	24.241	24.1668	24.5934	24.3886	24.561	6	14.1	27.7354	23			0.106478	0.0387101	0.0610463	Q8IXI2;H7BXZ6;J3KSR5	Q8IXI2;H7BXZ6	Mitochondrial Rho GTPase 1;Mitochondrial Rho GTPase	RHOT1	70.783
25.0678	24.9855	24.9737	24.566	24.7868	24.4229	24.5158	24.9187	9	8.8	28.0577	36			0.716756	-0.237197	-0.358648	Q5VZL5;H7C1I7	Q5VZL5;H7C1I7	Zinc finger MYM-type protein 4	ZMYM4	172.79
24.6303	24.2802	24.5342	24.3827	24.0053	23.981	23.997	23.8188	6	14.8	27.4536	24			2.88147	-0.50632	-0.85883	P53350;I3L387	P53350	Serine/threonine-protein kinase PLK1	PLK1	68.254
22.3324	22.7531	24.3734	23.1673	23.504	23.7019	23.41	24.0906	5	11.7	26.9492	21			0.513946	0.520078	0.538889	Q13895;H7BY94;F8WBL2	Q13895	Bystin	BYSL	49.601
29.4029	29.4489	28.4597	28.6411	29.0886	29.0098	28.5807	28.9247	5	29.6	32.5034	59			0.116183	-0.0871773	-0.111907	P06748;E5RI98	P06748	Nucleophosmin	NPM1	32.575
24.6359	25.6047	25.6512	25.8611	25.3842	25.3119	25.2645	26.2052	7	25	28.8663	20			0.108192	0.103207	0.121078	A0A024QZX5;A0A087X1N8;P35237	A0A024QZX5;A0A087X1N8;P35237	Serpin B6	SERPINB6	43.024
24.7142	25.3382	25.4784	24.8607	24.7473	25.1717	24.9742	25.1163	7	9.1	28.3657	20			0.18008	-0.0955048	-0.135111	O60343;Q5JU47;C9JIE2;Q86TI0	O60343	TBC1 domain family member 4	TBC1D4	146.56
22.2034	23.9635	24.9881	25.4062	25.1131	25.2628	25.4093	25.7122	5	12.7	28.4986	21			0.855591	1.23401	1.0077	P55084;B5MD38;F5GZQ3;C9JEY0;C9JE81;C9K0M0	P55084;B5MD38;F5GZQ3	Trifunctional enzyme subunit beta, mitochondrial;3-ketoacyl-CoA thiolase	HADHB	51.294
25.3612	23.9165	23.8639	24.3943	24.9673	24.2188	24.9482	24.4128	6	18.1	27.9565	20			0.262692	0.252786	0.282345	P36551;H0YA22;D6RER6	P36551	Oxygen-dependent coproporphyrinogen-III oxidase, mitochondrial	CPOX	50.151
24.7625	25.5515	25.2242	25.4968	25.6252	25.7476	24.9415	24.4584	6	26.1	28.8068	26			0.0663361	-0.0655828	-0.0769725	O75489;E9PS48	O75489	NADH dehydrogenase [ubiquinone] iron-sulfur protein 3, mitochondrial	NDUFS3	30.241
24.5674	24.1624	24.6941	24.416	24.521	24.4391	24.6093	24.5496	5	11.3	27.8559	30			0.23565	0.0697575	0.112569	O43660;H0YA24;H0YAA2;D6RA26	O43660;H0YA24	Pleiotropic regulator 1	PLRG1	57.193
24.1834	24.3977	24.788	24.6259	24.1282	24.6749	24.5023	23.8465	6	8	27.7665	23			0.407228	-0.210765	-0.28939	Q5T5C0;Q5JRH0;Q3B794	Q5T5C0	Syntaxin-binding protein 5	STXBP5	127.57
23.9642	24.2315	24.4077	23.9592	24.7268	24.7492	24.7386	24.6446	7	11.5	27.8612	26			2.66512	0.574153	0.938199	A0A087X054;Q9Y4L1;E9PJ21;A0A087WWI4;K7EQK2;J3QL06;J3KTF1;A0A087X214;A0A087WW13;Q9BST8;J3QQH7;J3QLE9	A0A087X054;Q9Y4L1;E9PJ21;A0A087WWI4;K7EQK2	Hypoxia up-regulated protein 1	HYOU1	104.78
27.296	27.3273	27.3113	27.6925	27.4592	27.3688	27.4984	26.7012	6	25.3	30.7137	31			0.298886	-0.149883	-0.211061	P78417;Q5TA02;Q5TA01	P78417;Q5TA02	Glutathione S-transferase omega-1	GSTO1	27.566
27.9144	28.059	27.745	27.5254	27.9369	28.1543	28.1457	27.6181	5	33.3	31.3611	21			0.393671	0.152807	0.227992	Q9Y3U8;J3QSB5;J3KTD3	Q9Y3U8;J3QSB5	60S ribosomal protein L36	RPL36	12.254
25.3207	24.8707	24.6651	22.4696	25.5195	23.9799	24.3065	25.6169	5	14.2	28.17	16			0.28711	0.524183	0.415933	Q13283;E5RIZ6;E5RH00;D6R9X5;D6R9A4;D6RBM9;D6REX8;D6RBR0;E5RI46;E5RIF8;D6RE13;D6RBW8;E5RH42;D6RGJ4;D6RAC7;E5RJU8;D6RB17	Q13283	Ras GTPase-activating protein-binding protein 1	G3BP1	52.164
26.5273	26.4367	24.3013	25.9347	26.9426	27.0045	27.9036	27.0734	5	26.1	30.2105	21			1.3555	1.43102	1.34559	P61224;F5H6R7;F5H004;F5GX62;E7ESV4;A0A0J9YXB3;F5H7Y6;A6NIZ1;F5H823;B7ZB78;F5GZG1;P62834;F5H4H0;F5GYH7;F5H077;F5GWU8;F5H491;F5H0B7;F5H500;A0A075B6Q0;F5GYB5;F8WBC0	P61224;F5H6R7;F5H004;F5GX62;E7ESV4;A0A0J9YXB3;F5H7Y6;A6NIZ1;F5H823;B7ZB78;F5GZG1;P62834	Ras-related protein Rap-1b;Ras-related protein Rap-1b-like protein;Ras-related protein Rap-1A	RAP1B;RAP1A	20.825
28.7702	28.7197	29.0811	29.2696	28.9106	28.8407	29.188	28.2092	5	38	32.2414	39			0.296187	-0.173028	-0.232423	P63104;E7EX29;B0AZS6;E7ESK7;B7Z2E6;H0YB80;E5RGE1;E5RIR4;E9PD24;E7EVZ2	P63104;E7EX29;B0AZS6;E7ESK7	14-3-3 protein zeta/delta	YWHAZ	27.745
25.6655	25.1457	25.3876	25.6048	25.6258	25.599	25.8522	25.878	7	14.2	29.0233	30			1.07807	0.287857	0.450576	Q8TC07;F8WDJ1;F8WF35;F8WCB5	Q8TC07	TBC1 domain family member 15	TBC1D15	79.49
24.2991	24.4478	24.8341	23.6728	24.6186	24.6068	24.5381	24.467	5	8.5	27.8762	20			0.449108	0.244207	0.328235	Q7Z3C6;H7C1G6;H7C152;C9JX27;C9JD65;C9IYZ9;C9JKV7;C9JDK4;C9JXG2	Q7Z3C6	Autophagy-related protein 9A	ATG9A	94.446
25.0249	25.3266	25.4748	25.5104	25.4407	25.4083	26.0353	26.056	5	16.3	28.9622	30			0.975372	0.40094	0.564094	P04899;P63096;P09471;A0A087WTB6;A2A2R6;Q5JWD1;H0Y7E8;H3BTM2;A0A087WZE5;C9JPP4;Q5JWE9;H0Y7F4;P11488;P19087;A8MTJ3;P38405;P63092;Q5JWF2	P04899;P63096	Guanine nucleotide-binding protein G(i) subunit alpha-2;Guanine nucleotide-binding protein G(i) subunit alpha-1	GNAI2;GNAI1	40.45
24.0434	24.3949	24.209	24.6266	24.1632	24.4509	23.775	24.2866	6	17	27.6976	20			0.334393	-0.149565	-0.216495	O75530;E9PJK2;H0YEL4;E9PMU3	O75530;E9PJK2;H0YEL4;E9PMU3	Polycomb protein EED	EED	50.197
27.8332	28.5841	28.0614	28.2894	27.517	27.6024	28.2229	28.1618	5	24.4	31.4905	27			0.614376	-0.316001	-0.424692	P62906	P62906	60S ribosomal protein L10a	RPL10A	24.831
25.8525	25.8893	25.9523	25.9462	25.9492	26.0429	25.6809	25.6679	7	29.6	29.2715	26			0.325104	-0.0748553	-0.125219	C9JW69;P18754;C9JRH2;C9JMJ4;C9J3R0;C9JQZ4	C9JW69;P18754;C9JRH2;C9JMJ4;C9J3R0;C9JQZ4	Regulator of chromosome condensation	RCC1	39.584
25.3597	25.4254	25.815	25.2295	25.5953	24.9759	25.6178	25.0694	5	44.6	28.7317	28			0.280254	-0.14276	-0.200695	H0YN28;H0YL33;H0YM50;H0YN42;P07355;H0YNA0;H0YNP5;H0YMD0;H0YMU9;A6NMY6;H0YN52;H0YKS4;H0YLE2;H0YMM1	H0YN28;H0YL33;H0YM50;H0YN42;P07355;H0YNA0;H0YNP5;H0YMD0;H0YMU9;A6NMY6;H0YN52;H0YKS4	Annexin;Annexin A2;Putative annexin A2-like protein	ANXA2;ANXA2P2	16.092
27.2357	27.4018	27.7411	27.3864	27.824	27.6705	27.7321	27.9463	5	24.2	31.0023	33			1.54919	0.352003	0.56553	F5H018;B5MDF5;J3KQE5;P62826;B4DV51;H0YFC6	F5H018;B5MDF5;J3KQE5;P62826;B4DV51	GTP-binding nuclear protein Ran	RAN	22.436
26.2534	26.4631	25.0959	26.1868	25.9187	26.2801	25.552	26.374	6	31.3	29.404	31			0.0299462	0.0313573	0.0364742	Q04828;A6NHU4;S4R3D5;P17516	Q04828;A6NHU4	Aldo-keto reductase family 1 member C1	AKR1C1	36.788
26.4802	25.7876	25.9224	25.5021	25.7562	25.6732	26.0155	26.1263	6	23	29.2788	34			0.0456958	-0.0302896	-0.0414142	Q9Y266;A0A0A0MSU9;A0A0A0MSS4	Q9Y266;A0A0A0MSU9	Nuclear migration protein nudC	NUDC	38.242
25.6681	25.856	25.6619	25.575	25.7881	25.7835	25.6008	25.4721	6	11.8	29.0019	33			0.111435	-0.0291305	-0.0488087	P49321;Q5T624;H0YDS9;E9PRH9;H0YF33;E9PPR5;E9PI86	P49321;Q5T624;H0YDS9;E9PRH9;H0YF33	Nuclear autoantigenic sperm protein	NASP	85.237
26.0128	25.0344	26.0473	25.8392	24.7979	24.8925	25.4578	25.1953	6	9.5	28.7765	23			1.21698	-0.64751	-0.829178	Q8IYB8	Q8IYB8	ATP-dependent RNA helicase SUPV3L1, mitochondrial	SUPV3L1	87.99
24.7652	25.3515	24.9518	25.2595	25.0691	24.9714	25.0414	25.1417	7	13.5	28.4201	24			0.0661911	-0.0260921	-0.0407471	Q9UKV8;Q9HCK5	Q9UKV8	Protein argonaute-2	AGO2	97.207
25.603	25.6433	25.8916	26.3479	26.3736	26.0685	26.1065	24.5648	6	19.7	29.3384	29			0.0751802	-0.0930824	-0.0985555	Q8NBS9	Q8NBS9	Thioredoxin domain-containing protein 5	TXNDC5	47.628
25.7588	26.1005	25.8589	25.8089	25.798	25.789	25.844	25.7941	6	12.5	29.2029	37			0.43958	-0.0754876	-0.13088	P23368	P23368	NAD-dependent malic enzyme, mitochondrial	ME2	65.443
24.8405	24.8581	24.9759	24.3646	25.4691	25.2108	25.3339	25.1609	5	11.7	28.4192	24			1.90267	0.533887	0.819279	Q4VB86;P11171;A0A1B0GWG0	Q4VB86;P11171	Protein 4.1	EPB41	69.889
25.3264	25.3914	25.3153	25.5944	25.664	25.623	25.4085	25.6058	6	20.5	28.8515	38			1.00657	0.168453	0.287362	O14929;F8WEW1;F8W9G7	O14929	Histone acetyltransferase type B catalytic subunit	HAT1	49.512
30.1169	29.7161	29.6275	30.6433	30.0603	30.1095	31.0415	29.5138	5	54.9	33.6855	63			0.151168	0.15533	0.174022	Q5JP53;P07437;Q5ST81;G3V5W4;G3V2R8;G3V3R4;G3V2N6	Q5JP53;P07437;Q5ST81	Tubulin beta chain	TUBB	47.766
26.5454	26.4999	26.4868	26.6649	26.1374	26.3955	26.5073	26.6655	6	17.8	29.8927	35			0.469692	-0.122848	-0.198687	Q13867;J3KSD8;K7ES02;K7ESE8;J3KS79;K7ENH5	Q13867;J3KSD8;K7ES02;K7ESE8	Bleomycin hydrolase	BLMH	52.562
25.4131	25.671	26.6555	25.8544	25.8472	25.4561	26.1812	24.7853	6	16.1	29.1344	46			0.354638	-0.33108	-0.366952	P50579;F8VRR3;G3V1U3;F8VSC4	P50579;F8VRR3;G3V1U3	Methionine aminopeptidase 2	METAP2	52.891
25.9377	25.9379	26.1597	26.1293	26.0343	25.9947	25.6301	25.83	7	18.7	29.4381	34			0.756733	-0.168895	-0.276944	E7ES33;E7EPK1;Q16181;G3V1Q4;A0A0U1RRE1;A0A0U1RQK0;A0A0U1RRD1;A0A0U1RRM2;A0A0U1RRH9;Q6ZU15	E7ES33;E7EPK1;Q16181;G3V1Q4	Septin-7	2007-09-01	48.715
26.7753	26.7049	26.9063	27.782	27.2016	26.8398	26.8009	26.536	9	52	30.2868	38			0.288805	-0.197555	-0.251628	P19623;K7ESL0;K7EL89;K7EKM4	P19623	Spermidine synthase	SRM	33.824
24.845	24.6178	23.7013	24.5777	24.4105	24.7654	24.4604	25.5135	6	9.5	28.1026	18			0.439731	0.351999	0.410316	E7EPM6;P33121;D6RER0;B7Z3Z9;H0Y9Z9;D6RG07;H0Y9U7	E7EPM6;P33121;D6RER0;B7Z3Z9	Long-chain-fatty-acid--CoA ligase 1	ACSL1	74.281
26.2928	25.7684	25.6163	25.9356	25.9258	25.6992	25.386	26.0124	6	22.2	29.1566	28			0.307681	-0.147395	-0.210063	E9PIR7;F8W809;A0A087WSW9;A0A182DWI3;A0A087WSY9;Q16881;E2QRB9;E9PKD3;E9PLT3;E9PKI4;A0A0B4J225;E9PIZ5;E9PQI3;E9PRI8	E9PIR7;F8W809;A0A087WSW9;A0A182DWI3;A0A087WSY9;Q16881;E2QRB9;E9PKD3	Thioredoxin reductase 1, cytoplasmic	TXNRD1	53.166
25.5546	25.4016	25.6128	25.3075	26.1059	25.9116	25.8993	26.1994	7	31.4	29.1983	24			2.82086	0.559885	0.930442	Q9Y5M8;H7C4H2;C9J5Z8	Q9Y5M8	Signal recognition particle receptor subunit beta	SRPRB	29.702
24.7317	24.1168	24.5903	24.8534	24.2196	23.811	23.8665	23.9494	11	11.2	27.559	33			1.78784	-0.611467	-0.89266	Q99570;D6RJ98;D6RAC3;D6RBB7	Q99570	Phosphoinositide 3-kinase regulatory subunit 4	PIK3R4	153.1
24.1313	23.3659	23.918	24.2217	23.7365	23.9436	23.542	23.9127	8	6.2	27.2307	25			0.238476	-0.125498	-0.175981	A0A0A0MTH9;O14981	A0A0A0MTH9;O14981	TATA-binding protein-associated factor 172	BTAF1	206.93
26.7888	26.2108	27.1722	27.4973	26.9559	26.8802	26.9153	26.9132	7	39	30.2982	34			0.00138203	-0.00114918	-0.00147925	P10768;X6RA14;H7BZT7;U3KQT1	P10768;X6RA14;H7BZT7	S-formylglutathione hydrolase	ESD	31.462
27.6921	27.6147	27.9307	26.9903	28.1112	26.9811	27.652	27.1383	6	39.4	30.9462	17			0.0968878	-0.0863299	-0.10451	Q9UBQ5;K7ES31;K7EQM4;A0A087WVB9;K7ERF1;B4DQ48;K7EK53	Q9UBQ5;K7ES31;K7EQM4;A0A087WVB9;K7ERF1	Eukaryotic translation initiation factor 3 subunit K	EIF3K	25.059
25.0552	25.4878	25.4028	25.401	25.2386	25.5383	25.4241	25.4209	6	40.3	28.7329	35			0.244715	0.068778	0.11197	P84095	P84095	Rho-related GTP-binding protein RhoG	RHOG	21.308
24.3618	24.1611	24.9523	24.0716	25.2407	24.9043	24.4359	24.2055	6	16.6	27.9838	23			0.456739	0.309908	0.384797	P48735;H0YL11	P48735	Isocitrate dehydrogenase [NADP], mitochondrial	IDH2	50.909
28.2429	28.9318	28.2446	28.3557	28.8702	29.392	28.7609	27.9679	6	57.7	32.1676	29			0.395785	0.304017	0.363143	P02008	P02008	Hemoglobin subunit zeta	HBZ	15.637
24.8235	20.9377	24.3308	24.7211	24.8663	25.26	24.7911	24.5133	7	14.3	28.1025	30			0.575601	1.1544	0.801297	P02545;Q3BDU5;Q5TCI8;H0YAB0;A0A0C4DGC5	P02545;Q3BDU5;Q5TCI8	Prelamin-A/C;Lamin-A/C	LMNA	74.139
26.6871	26.523	26.0798	26.1961	26.5999	26.441	26.4407	26.5326	6	21.3	29.8606	32			0.396673	0.13205	0.204353	P40925;B9A041;B8ZZ51;C9JF79;C9JLV6	P40925;B9A041;B8ZZ51;C9JF79	Malate dehydrogenase, cytoplasmic;Malate dehydrogenase	MDH1	36.426
26.3075	26.2163	25.9379	25.6658	25.4069	25.4844	25.5427	23.6576	8	12.5	29.0153	28			1.0995	-1.00895	-1.03113	Q86UV5;A0A0A0MRS6;E9PJH5;E9PJ93	Q86UV5;A0A0A0MRS6	Ubiquitin carboxyl-terminal hydrolase 48	USP48	119.03
26.34	26.3157	26.5032	26.6277	26.725	26.4409	25.9024	26.579	8	14	29.7828	37			0.0637821	-0.0348034	-0.0501612	P11387;E5RIC7;Q969P6	P11387	DNA topoisomerase 1	TOP1	90.725
27.0105	26.9765	26.8495	26.4119	26.2575	26.0422	26.4856	26.7225	11	14.2	29.9434	39			1.13235	-0.435143	-0.620623	A0A087WVM4;B7ZM99;Q6UB35;H0Y327;Q5JYA8;Q5JYA3;Q4VXM0;Q4VXM1	A0A087WVM4;B7ZM99;Q6UB35	Monofunctional C1-tetrahydrofolate synthase, mitochondrial	MTHFD1L	99.31
25.8081	25.42	25.0821	25.3576	25.1279	25.6356	25.3068	26.4069	7	20.5	28.9504	27			0.259337	0.202362	0.246803	E5RFU2;P34913;E5RFH6;H0YAW7;E5RI53	E5RFU2;P34913;E5RFH6;H0YAW7	Bifunctional epoxide hydrolase 2;Cytosolic epoxide hydrolase 2;Lipid-phosphate phosphatase	EPHX2	58.855
27.8376	27.3088	27.195	27.0062	26.9737	27.6337	27.2022	28.065	8	32.1	30.9911	29			0.170102	0.131737	0.164675	Q15366;H3BRU6;F8VZX2;F8VXH9;F8W0G4;F8W1G6;H3BND9;H3BSS4;F8VRH0;J3QT27;E9PFP8;P57721	Q15366;H3BRU6;F8VZX2;F8VXH9;F8W0G4;F8W1G6	Poly(rC)-binding protein 2	PCBP2	38.58
26.2409	25.3832	25.8188	25.3953	25.7006	25.9538	25.6458	26.2537	6	9.3	29.1854	23			0.304657	0.17894	0.239585	A0A087WUT6;O60841	A0A087WUT6;O60841	Eukaryotic translation initiation factor 5B	EIF5B	138.68
25.3081	25.416	25.5111	25.776	25.8527	25.3027	25.5888	25.0051	7	19.1	28.8603	18			0.116905	-0.0654449	-0.092399	P60228;H0YBR5;E5RGA2;E5RIT4;H0YAW4;E5RHS5;E5RIP5;E5RJ25;H0YBP5;E5RII3	P60228;H0YBR5;E5RGA2	Eukaryotic translation initiation factor 3 subunit E	EIF3E	52.22
25.4316	25.2073	25.4215	25.118	25.3112	24.7852	24.9009	25.1981	6	11.7	28.5627	26			0.842869	-0.245723	-0.380315	Q10471	Q10471	Polypeptide N-acetylgalactosaminyltransferase 2;Polypeptide N-acetylgalactosaminyltransferase 2 soluble form	GALNT2	64.732
27.8757	27.5388	27.4426	27.3668	27.4943	27.4974	27.3249	27.8243	7	22.1	31.1059	52			0.0473039	-0.0207415	-0.0317487	Q15233;H7C367;C9JYS8;C9J4X2;C9IZL7	Q15233;H7C367;C9JYS8	Non-POU domain-containing octamer-binding protein	NONO	54.231
25.8611	25.7135	25.728	25.5864	25.7164	25.5931	25.4417	25.8074	9	23.2	29.0235	34			0.368628	-0.0825753	-0.138283	O94826	O94826	Mitochondrial import receptor subunit TOM70	TOMM70A	67.454
25.7751	25.4763	25.5271	25.5108	24.9444	25.0678	25.384	25.4182	7	12.6	28.7237	32			1.46069	-0.36871	-0.580162	Q13618;A0A087WTG3;H7C1L6;A0A087X1R9;H7C399	Q13618	Cullin-3	CUL3	88.929
24.7242	25.3386	25.4259	25.6441	25.8462	25.7681	25.6093	24.714	6	29.9	28.8436	26			0.250664	0.201195	0.243153	Q15691	Q15691	Microtubule-associated protein RP/EB family member 1	MAPRE1	29.999
26.2118	26.9337	26.3517	26.4428	26.5238	26.8602	26.642	26.9202	6	24.6	29.9766	30			0.663894	0.251548	0.368682	P11766;H0YAG8;D6RFE4;D6RAY0;D6R9G2	P11766;H0YAG8	Alcohol dehydrogenase class-3	ADH5	39.724
24.9061	26.3788	26.066	26.6726	25.1255	25.9817	25.7234	25.734	8	27.8	29.3039	34			0.370204	-0.364735	-0.393213	Q9Y617	Q9Y617	Phosphoserine aminotransferase	PSAT1	40.422
26.2719	27.2208	26.2151	26.7864	26.2396	26.9766	26.3102	26.2875	7	25.6	29.9963	32			0.233115	-0.170102	-0.21408	B4DY09;Q12905;X6R6Z1;A0A0A0MRL0	B4DY09;Q12905;X6R6Z1	Interleukin enhancer-binding factor 2	ILF2	38.91
26.6914	27.4886	27.1283	27.1692	27.0389	26.9334	27.0411	27.3197	7	42.9	30.4283	39			0.0702886	-0.0360947	-0.0528069	P27348;E9PG15	P27348;E9PG15	14-3-3 protein theta	YWHAQ	27.764
25.83	25.5642	25.7982	25.9292	25.785	25.5467	25.9275	26.1645	6	27	29.141	34			0.197756	0.0755177	0.116049	P20042	P20042	Eukaryotic translation initiation factor 2 subunit 2	EIF2S2	38.388
28.6643	28.2862	28.3268	28.0612	27.9129	28.038	28.1194	28.3033	8	28.4	31.5093	38			0.805528	-0.241224	-0.37171	A0A024R4M0;P46781;B5MCT8;C9JM19;F2Z3C0;A8MXK4	A0A024R4M0;P46781;B5MCT8;C9JM19	40S ribosomal protein S9	RPS9	22.591
24.1648	24.5292	24.1921	24.788	24.2889	24.3631	24.1334	24.0752	11	7.5	27.6293	29			0.588275	-0.203368	-0.306841	O75165;H0Y8Q2	O75165	DnaJ homolog subfamily C member 13	DNAJC13	254.41
27.0292	27.4073	27.2419	27.376	27.106	27.3382	27.1054	27.1317	7	20.9	30.5853	44			0.398998	-0.0932755	-0.154747	Q9ULV4;B4E3S0;H0YHL7;F8W1H8;F8VUX3;F8VSA4;F8VRE9;F8VTT6;F8VVB7;F8VV53;J3QLV6;J3KSS5;Q6QEF8	Q9ULV4;B4E3S0	Coronin-1C;Coronin	CORO1C	53.248
25.8005	25.9998	26.0032	26.138	26.1799	26.1991	26.2729	25.831	9	21	29.5308	37			0.515861	0.135335	0.218051	H0YDU8;P53041;A8MU39	H0YDU8;P53041;A8MU39	Serine/threonine-protein phosphatase;Serine/threonine-protein phosphatase 5	PPP5C	55.096
25.6145	26.1855	26.0799	25.5698	25.7821	25.9245	25.6759	25.1999	8	23.5	29.0827	37			0.434522	-0.216837	-0.300066	P17812	P17812	CTP synthase 1	CTPS1	66.69
25.806	25.3709	25.1027	24.3828	25.3853	25.337	25.2474	24.9545	10	8	28.569	25			0.0748494	0.0654259	0.080406	P16157;H0YBS0;H0YAY8	P16157;H0YBS0	Ankyrin-1	ANK1	206.26
25.0062	24.6374	24.6082	24.5769	24.6806	25.079	24.7163	25.2386	8	12.9	28.2058	31			0.619384	0.22143	0.330547	I3L0N3;P46459;I3L2G1;I3L0L3;K7EQD6;I3L338;I3L4Q9	I3L0N3;P46459	Vesicle-fusing ATPase	NSF	82.091
25.4285	25.6199	26.2902	25.9344	26.4013	26.1259	26.0301	25.5692	7	31.2	29.3532	33			0.359916	0.213376	0.282217	P40938;A0A087X270	P40938	Replication factor C subunit 3	RFC3	40.556
24.7796	24.7237	24.9753	23.0771	25.5714	25.1418	24.9597	25.8477	7	8.7	28.4333	27			1.06153	0.991238	1.00673	Q9BPX3;D6RA93;H0Y9Z8	Q9BPX3	Condensin complex subunit 3	NCAPG	114.33
25.6689	25.9371	25.9471	25.9436	25.1703	25.8268	25.7165	26.0489	9	14.3	29.0797	41			0.407153	-0.183548	-0.262641	Q8NE71;H0YGW7;Q5STZ8;A0A0G2JIC2	Q8NE71;H0YGW7	ATP-binding cassette sub-family F member 1	ABCF1	95.925
25.0942	24.6597	24.8153	24.5189	25.8483	25.5198	25.8855	25.7109	8	9.4	28.7755	34			3.20916	0.969098	1.49438	O94851;E9PKW5;E9PJB0;E9PRE0;E9PL42;E9PNC3;E9PKI3	O94851	Protein-methionine sulfoxide oxidase MICAL2	MICAL2	126.69
26.1814	25.735	26.1932	26.1606	26.3058	26.2512	26.1424	26.2145	8	24.8	29.5038	50			0.666647	0.160913	0.261132	Q96KP4;J3QKT2;J3KRD5;J3QQN6;J3QR27;J3QLU1;A0A087WVS2;J3QKQ0;J3QRD0;J3QL02;J3KSV5;A0A087WYZ1;J3QRA8;J3KRJ8;J3QRH4	Q96KP4;J3QKT2	Cytosolic non-specific dipeptidase	CNDP2	52.878
24.5404	24.9317	25.4113	25.454	25.5678	25.3069	24.632	25.2219	8	27.5	28.5414	38			0.124928	0.0978003	0.123306	P62191;G3V4X1	P62191	26S protease regulatory subunit 4	PSMC1	49.184
28.7857	28.3493	28.4221	28.844	28.7526	28.8717	28.8618	28.637	8	22.7	32.0578	39			0.628349	0.180537	0.283467	Q16658;C9JPH9;C9JFC0;A0A0A0MSB2	Q16658	Fascin	FSCN1	54.529
26.932	26.9402	26.6448	27.0251	26.6271	26.5939	26.9045	26.4427	8	13	30.1317	42			0.983844	-0.243483	-0.388296	F8WDV0;Q9UI26;D6RCN7;D6RJB1	F8WDV0;Q9UI26	Importin-11	IPO11	99.707
24.764	24.9223	25.5355	25.4478	25.101	25.7452	25.0481	25.7378	7	19.8	28.7352	35			0.388026	0.240633	0.311984	Q9UBB4;B1AHE4;B1AHE3	Q9UBB4	Ataxin-10	ATXN10	53.488
26.202	26.2694	26.2056	26.1836	26.2266	26.1729	26.0534	25.8213	8	22.6	29.4621	47			0.790665	-0.146607	-0.24767	Q16401;Q4VXH0	Q16401	26S proteasome non-ATPase regulatory subunit 5	PSMD5	56.195
25.5535	24.8841	24.6766	25.3573	24.7608	25.1354	24.6197	25.5349	9	27.6	28.516	34			0.137683	-0.105202	-0.133339	P12814;H9KV75;G3V2W4;G3V2N5;H0YJW3;H7C5W8;P35609;Q08043;H0YJ11;A0A087WSZ2;G3V5M4;G3V380	P12814;H9KV75	Alpha-actinin-1	ACTN1	103.06
26.0567	26.6477	27.1411	27.2737	26.9768	27.29	26.9055	25.5164	10	23.8	30.2273	52			0.080688	-0.10764	-0.109693	Q12874	Q12874	Splicing factor 3A subunit 3	SF3A3	58.848
25.9256	26.3893	26.8472	27.2114	26.697	27.048	26.8642	26.9208	9	27.8	30.2142	45			0.45017	0.289138	0.366771	A0A087X2I1;P62333;H0YJC0;H0YJS8;H0YJX2;H0YJE9;H0YJT1	A0A087X2I1;P62333	26S protease regulatory subunit 10B	PSMC6	45.796
24.9173	24.8464	24.6376	25.1311	25.5597	25.0625	24.7231	24.9324	7	14.3	28.3876	19			0.400096	0.18634	0.264378	P46060;H0Y4Q3;B0QYT5;B0QYT4	P46060	Ran GTPase-activating protein 1	RANGAP1	63.541
27.5761	27.7086	27.2717	27.656	27.8295	27.5204	27.6	27.739	8	45.9	30.9314	35			0.44598	0.119123	0.192223	K7ENG2;P26368	K7ENG2;P26368	Splicing factor U2AF 65 kDa subunit	U2AF2	33.901
25.4856	25.3063	25.5683	25.0239	25.5674	25.1924	24.7923	24.9729	7	8.5	28.6433	37			0.472718	-0.214809	-0.304364	Q9NW08	Q9NW08	DNA-directed RNA polymerase III subunit RPC2	POLR3B	127.78
25.9084	26.4019	26.4936	26.1848	25.5931	26.1207	25.9927	25.4611	6	17.1	29.4174	28			1.17136	-0.455259	-0.646416	B0QYD3;Q9UH17;Q6ICH2;P31941;Q96AK3	B0QYD3;Q9UH17	DNA dC->dU-editing enzyme APOBEC-3B	APOBEC3B	57.208
25.2289	24.5138	24.3258	23.8432	24.4662	25.104	24.4825	24.7506	7	20.8	27.996	14			0.286519	0.222939	0.270588	P43490;A0A0C4DFS8	P43490	Nicotinamide phosphoribosyltransferase	NAMPT	55.52
25.2039	25.0792	25.1756	24.8925	24.3635	24.7919	25.0314	24.9981	7	26.9	28.2854	48			0.868974	-0.291573	-0.43584	F6T1Q0;Q6L8Q7	F6T1Q0;Q6L8Q7	2,5-phosphodiesterase 12	PDE12	52.175
24.5118	24.2171	24.0343	24.2894	24.1488	24.4684	23.8957	24.6698	7	7.1	27.619	30			0.0582022	0.0325427	0.0466516	F5H4R1;J3KNB8;F5H538;Q9Y6R4;F5H1X6	F5H4R1;J3KNB8;F5H538;Q9Y6R4;F5H1X6	Mitogen-activated protein kinase kinase kinase 4	MAP3K4	163.01
26.2929	26.2033	26.8605	26.1802	27.1895	26.996	27.3174	26.8887	7	18.9	30.2822	46			2.05412	0.7137	1.03863	Q96N66;A9C4B8;M0R1Z5;H7C2M4;C9J4E9;A0A0G2JNX6	Q96N66	Lysophospholipid acyltransferase 7	MBOAT7	52.764
24.9801	24.8955	25.1464	25.5969	24.7676	25.2147	25.0295	25.1834	9	11	28.4404	34			0.228292	-0.105908	-0.154221	O95487	O95487	Protein transport protein Sec24B	SEC24B	137.42
25.6741	25.7488	25.8914	25.4745	25.7431	26.425	26.4992	25.6539	9	29.5	29.2984	31			0.799325	0.383097	0.519036	E9PM69;R4GNH3;P17980;E9PKD5;E9PMD8;E9PN50;E9PLG2	E9PM69;R4GNH3;P17980;E9PKD5;E9PMD8;E9PN50	26S protease regulatory subunit 6A	PSMC3	44.323
27.1897	26.8277	27.2125	26.6075	27.0026	25.7441	26.4137	26.8729	6	23.4	30.0898	25			0.6813	-0.451033	-0.55007	Q9NR45;Q5TBR0;Q5TBR1	Q9NR45	Sialic acid synthase	NANS	40.307
23.4917	23.8848	23.5298	23.2687	24.032	24.6528	25.1517	25.2239	6	10.8	27.7314	25			2.15983	1.22135	1.52012	Q9BZF1;F8VQX7;F8VUA7;F8VVD3;F8VVE7;F8VZ43	Q9BZF1;F8VQX7;F8VUA7	Oxysterol-binding protein-related protein 8;Oxysterol-binding protein	OSBPL8	101.19
23.8721	24.0496	23.9789	23.75	24.0795	24.0965	23.6059	23.7994	7	14.4	27.2018	29			0.0447707	-0.0173273	-0.0272882	Q9NYH9;J3QSA7;J3KRR8	Q9NYH9	U3 small nucleolar RNA-associated protein 6 homolog	UTP6	70.193
28.8928	29.3463	28.8604	29.34	29.3366	29.2091	28.7185	29.8943	7	25.4	32.6912	49			0.267599	0.17974	0.231417	P16403;P16402;P22492;Q02539	P16403;P16402	Histone H1.2;Histone H1.3	HIST1H1C;HIST1H1D	21.364
25.4553	25.2649	24.8548	25.0385	25.1403	25.0403	24.2862	25.2398	7	20.1	28.3764	37			0.391423	-0.226722	-0.300783	Q9UHD8;K7ER52;K7EIE4;K7ER14;K7EQD7;K7EJL9;K7EK18;K7EL40;K7EJ51;K7EJZ2;K7ELJ9;K7ERG1;K7EQ08;K7EIR4;K7EKN4;K7EN52;K7EJV0;K7ENQ5;K7EPY1;K7ENL0	Q9UHD8	Septin-9	2009-09-01	65.401
26.3574	25.6364	25.4018	26.3822	26.1364	26.5406	26.0206	26.6772	7	23	29.6147	24			0.646626	0.399235	0.501767	A6NLN1;K7ES59;K7ELW5;K7EK45;X6R242;A0A087WU68	A6NLN1;K7ES59		PTBP1	56.51
25.3006	25.6301	25.3578	24.9238	25.601	25.2249	25.1849	25.7197	10	9.9	28.6656	25			0.270355	0.129538	0.185667	O95347;Q5T821;A0A0C4DGE5	O95347	Structural maintenance of chromosomes protein 2	SMC2	135.65
26.4361	26.3739	26.5006	26.669	26.2523	25.4359	26.0235	25.9994	9	17.3	29.5274	47			1.65788	-0.567167	-0.82818	Q96G03;E9PD70;E7ENQ8	Q96G03	Phosphoglucomutase-2	PGM2	68.283
25.1639	25.4018	24.9157	25.615	24.642	24.2218	24.7572	25.0625	7	10.5	28.2647	44			1.40199	-0.603205	-0.825967	Q96KR1;H0Y8W1	Q96KR1	Zinc finger RNA-binding protein	ZFR	117.01
28.4372	28.5316	28.3429	28.5381	28.6747	28.4778	28.2333	28.5778	8	33.7	31.8316	62			0.0989443	0.0284472	0.0469899	P22626;A0A087WUI2	P22626;A0A087WUI2	Heterogeneous nuclear ribonucleoproteins A2/B1	HNRNPA2B1	37.429
24.6873	25.5145	25.3906	25.4726	25.4337	25.6759	25.8379	25.6244	7	8.8	28.8941	30			0.901306	0.376763	0.529341	V9GYM8;Q92974;V9GYF5;V9GYG5;V9GZ14;V9GZ58;V9GYF0;Q5VY93	V9GYM8;Q92974	Rho guanine nucleotide exchange factor 2	ARHGEF2	116.07
26.978	26.3339	26.0424	25.9504	25.9609	26.0267	26.2831	27.3488	6	40.2	29.7597	38			0.0708454	0.0786896	0.0877103	P37802;X6RJP6	P37802;X6RJP6	Transgelin-2	TAGLN2	22.391
24.4022	24.5416	24.3663	24.5838	25.2498	24.5792	24.7136	24.6655	10	7.5	28.0319	28			1.06089	0.328562	0.497282	Q96N67;A0A1B0GUE9;A0A0C4DGY6;A0A1B0GVW2;A0A1B0GWE0;A0A0U1RQT6;A0A0U1RR97	Q96N67;A0A1B0GUE9	Dedicator of cytokinesis protein 7	DOCK7	242.56
25.9321	26.4452	26.5667	26.6167	27.0004	27.0004	26.8857	26.7235	7	25.7	30.0351	38			1.62717	0.512281	0.764601	P21912;A0A087WWT1;A0A087WXX8	P21912;A0A087WWT1;A0A087WXX8	Succinate dehydrogenase [ubiquinone] iron-sulfur subunit, mitochondrial	SDHB	31.629
24.9592	25.1837	25.2439	25.3681	25.411	25.0848	24.8333	25.1255	8	14.9	28.5121	29			0.203788	-0.0751052	-0.116252	A0A0C4DGX4;Q13616	A0A0C4DGX4;Q13616	Cullin-1	CUL1	87.387
25.1273	25.6995	25.3213	25.187	24.9709	25.1441	25.0112	25.4022	11	10.9	28.5297	47			0.589284	-0.20167	-0.305009	Q10570;A0A087X101;E9PIM1	Q10570	Cleavage and polyadenylation specificity factor subunit 1	CPSF1	160.88
24.8039	26.1796	25.4284	25.508	25.1911	25.3731	25.4063	25.5234	9	21	28.8425	36			0.139268	-0.106526	-0.134905	A0A0A0MSJ0;Q86XP3	A0A0A0MSJ0;Q86XP3	ATP-dependent RNA helicase DDX42	DDX42	77.813
25.6934	26.2147	26.0876	26.1616	26.4718	26.7129	26.2279	26.4097	10	23.6	29.6353	29			1.44094	0.416247	0.635541	Q9HCC0;D6RD67;D6R9R1;D6RDF7;A0A0G2JM88	Q9HCC0	Methylcrotonoyl-CoA carboxylase beta chain, mitochondrial	MCCC2	61.332
25.7168	25.7148	25.7301	25.6517	25.5499	26.1226	25.9476	26.0363	13	14.6	29.1267	38			0.823785	0.21077	0.335758	H7BXY3;Q7L2E3	H7BXY3;Q7L2E3	Putative ATP-dependent RNA helicase DHX30	DHX30	130.55
24.4109	24.6125	24.5564	23.8977	25.5562	24.3916	24.3956	24.7154	7	7.9	27.9976	27			0.582044	0.39533	0.482578	Q9BZH6;S4R3Z0	Q9BZH6	WD repeat-containing protein 11	WDR11	136.68
25.2784	25.6847	24.8881	26.2209	24.6057	25.2766	25.0682	25.3083	7	7.3	28.7547	26			0.665126	-0.453308	-0.547474	O14617;A0A087WYN6	O14617	AP-3 complex subunit delta-1	AP3D1	130.16
27.8671	27.2021	27.265	26.9039	26.5309	27.1899	26.538	27.6146	7	13.3	30.4975	31			0.461784	-0.34121	-0.409519	A0A0A6YYL4;P57737;E7EP81;I3L167;I3L351;I3L442;I3L212	A0A0A6YYL4;P57737	Coronin;Coronin-7	CORO7-PAM16;CORO7	114.16
27.4002	27.5511	27.7491	27.7887	28.5983	28.9054	28.8183	28.4323	7	23.1	31.67	37			3.57032	1.06629	1.66559	F8VVM2;Q00325;F8VZL5;F8VWR4;F8VWQ0	F8VVM2;Q00325	Phosphate carrier protein, mitochondrial	SLC25A3	36.161
28.5031	28.4629	29.3245	28.9572	28.5689	27.9726	28.7777	28.5183	6	27	31.9794	51			0.629611	-0.352577	-0.459747	E7EQV9;E7ENU7;P61313;E7EX53;E7ERA2	E7EQV9;E7ENU7;P61313	Ribosomal protein L15;60S ribosomal protein L15	RPL15	20.51
29.2419	29.5989	29.1633	29.908	29.069	29.8104	29.026	29.7871	6	42.7	32.8117	30			0.0708657	-0.054873	-0.070633	P62805	P62805	Histone H4	HIST1H4A	11.367
26.7191	26.1706	26.8274	26.5181	26.3769	26.0666	26.6444	26.4538	7	31.4	29.8214	27			0.407023	-0.173385	-0.252051	Q13347;Q5TFK1	Q13347	Eukaryotic translation initiation factor 3 subunit I	EIF3I	36.501
26.0075	26.4289	26.2019	26.1849	25.828	25.9468	26.3983	25.4693	7	24	29.447	39			0.67819	-0.295218	-0.415674	Q01518;Q5T0R7;Q5T0R6;Q5T0R5;Q5T0R4;Q5T0R3;Q5T0R2;Q5T0R1;Q5T0R9;B7Z385;A0A087X0J3;A0A087WZ15;E9PDI2;P40123	Q01518	Adenylyl cyclase-associated protein 1	CAP1	51.901
25.9813	26.1507	26.4962	26.5773	25.9939	26.2193	26.3558	25.3209	6	16.7	29.525	33			0.571446	-0.328897	-0.427361	P16930;H0YLC7	P16930;H0YLC7	Fumarylacetoacetase	FAH	46.374
26.2267	26.5846	26.226	26.1064	26.1261	26.2123	26.1984	26.4741	6	19.9	29.5711	44			0.0944035	-0.0332246	-0.0528626	P24752;H0YEL7;E9PKF3;E9PRQ6	P24752;H0YEL7	Acetyl-CoA acetyltransferase, mitochondrial	ACAT1	45.199
25.729	26.0299	25.4206	25.5324	25.4617	25.2552	24.8531	25.5778	7	12.2	28.8321	46			0.962934	-0.391001	-0.552417	Q15269;A0A0B4J2E5;C9J544	Q15269;A0A0B4J2E5	Periodic tryptophan protein 2 homolog	PWP2	102.45
26.8649	26.682	27.1485	27.7127	27.1789	27.6416	27.4785	26.6216	7	19.2	30.6497	38			0.154441	0.128136	0.156691	P10515;H0YDD4;E9PEJ4	P10515;H0YDD4;E9PEJ4	Dihydrolipoyllysine-residue acetyltransferase component of pyruvate dehydrogenase complex, mitochondrial;Acetyltransferase component of pyruvate dehydrogenase complex	DLAT	68.996
27.0912	27.0837	27.2261	27.7231	26.997	26.6378	26.7735	26.5415	7	23	30.3252	38			1.6274	-0.543578	-0.798957	P60891;B1ALA7;B7ZB02;A6NMS2	P60891;B1ALA7	Ribose-phosphate pyrophosphokinase 1	PRPS1	34.834
25.8354	25.8137	25.5606	25.0758	25.5939	25.8704	25.8833	25.3955	9	7.8	29.0114	28			0.215255	0.11437	0.160604	A0A087WYN9;Q7Z478	A0A087WYN9;Q7Z478	ATP-dependent RNA helicase DHX29	DHX29	155.29
26.5616	26.0444	26.7924	26.1633	26.3308	26.7446	26.7071	26.4089	6	16.5	29.87	26			0.330937	0.15742	0.224046	J3QSV6;O76021;I3L3C4;I3L3U9;I3L234	J3QSV6;O76021;I3L3C4;I3L3U9;I3L234	Ribosomal L1 domain-containing protein 1	RSL1D1	48.208
25.4287	25.1444	25.5739	25.7571	25.6119	25.5727	25.3962	25.6001	6	15.6	28.8607	36			0.196694	0.0692177	0.108354	O00232	O00232	26S proteasome non-ATPase regulatory subunit 12	PSMD12	52.904
27.1744	27.6	27.887	27.8431	27.6966	27.789	27.643	27.6357	7	31.9	30.9751	48			0.148241	0.0649619	0.0973846	P62701;C9JEH7;Q8TD47;P22090	P62701	40S ribosomal protein S4, X isoform	RPS4X	29.597
25.8501	25.7305	25.7275	25.5181	25.3169	25.4707	25.2401	25.3496	6	10.7	28.8742	37			2.29787	-0.36224	-0.620228	Q96RP9;C9IZ01;F8WAU4	Q96RP9;C9IZ01	Elongation factor G, mitochondrial	GFM1	83.471
27.0931	27.3783	27.2204	26.4783	27.0409	26.9063	27.1254	27.3317	6	4.7	30.4117	28			0.0993306	0.0585504	0.0817582	D6REX3;O94979;H7BXG7;D6RHZ5;H0Y8V7;H0YAB3;H0Y9K1;H0Y8W8;H0YAF5;H0Y9V3;H0Y9T9	D6REX3;O94979;H7BXG7;D6RHZ5;H0Y8V7;H0YAB3	Protein transport protein Sec31A	SEC31A	136.22
27.2364	26.1201	27.0561	27.5193	27.7109	27.848	27.8192	27.8067	6	24.9	30.8868	46			1.43201	0.813232	1.01088	Q9P035;H3BPZ1;H3BS72;H3BRL8;H3BMZ1	Q9P035;H3BPZ1;H3BS72	Very-long-chain (3R)-3-hydroxyacyl-CoA dehydratase 3	HACD3	43.159
25.9356	25.9751	26.3172	25.3469	26.6315	26.8193	27.0424	26.6113	7	12.5	29.855	36			2.10854	0.882423	1.2171	Q99805	Q99805	Transmembrane 9 superfamily member 2	TM9SF2	75.775
25.1705	25.7571	25.3349	25.7069	25.5741	25.5757	25.5268	25.5554	10	16.1	28.8716	40			0.178621	0.0656424	0.102056	K4DI93;Q13620;A6NE76;A0A0A0MR50;Q13619;A0A087WWN2	K4DI93;Q13620	Cullin-4B	CUL4B	102.75
25.0121	25.1367	25.1527	24.9164	25.4741	25.3306	25.7986	25.447	11	12.5	28.6217	25			2.14406	0.458108	0.745217	P18206;Q5JQ13	P18206;Q5JQ13	Vinculin	VCL	123.8
27.9967	28.1135	28.3543	27.9966	28.018	27.8619	28.1003	28.0206	8	35.9	31.3766	39			0.545766	-0.115082	-0.192457	P18124;A8MUD9;C9JZ88;C9JIJ5	P18124;A8MUD9	60S ribosomal protein L7	RPL7	29.225
26.3258	26.6153	26.8913	27.091	27.067	26.8585	26.7853	26.2339	8	41.4	30.0984	40			0.00735698	0.00534582	0.00718922	P25786;F5GX11;B4DEV8	P25786;F5GX11	Proteasome subunit alpha type-1	PSMA1	29.555
25.9977	26.5505	26.6396	26.3248	26.216	26.2888	25.9708	26.1397	8	34.9	29.6526	34			0.68479	-0.224347	-0.340705	Q15019;B5MCX3;C9J2Q4;H7C2Y0;C9IZU3;C9J938;H7C310;C9JB25;C9IY94;C9JQJ4;C9JT15;C9JSE7;A0A1B0GXJ2;C9JFT1;F8WB65;B5MD47;C9JZI2	Q15019;B5MCX3;C9J2Q4;H7C2Y0	Septin-2	2002-09-01	41.487
24.8268	25.1467	25.3318	25.0221	25.0054	25.0454	25.3237	24.8894	8	12.6	28.4718	34			0.0391104	-0.0158501	-0.024745	Q9H4L5;C9J8P4;C9JEF2;C9JZ19	Q9H4L5	Oxysterol-binding protein-related protein 3	OSBPL3	101.22
25.7243	25.092	25.6464	24.7452	25.44	25.8991	25.4931	25.4816	9	18.5	28.7998	38			0.49132	0.27646	0.365423	P49748;G3V1M7;J3QRJ8;K7EQP4;J3KS89;K7EJW8;J3KSR4;K7EMF8;J3QKU9	P49748;G3V1M7	Very long-chain specific acyl-CoA dehydrogenase, mitochondrial	ACADVL	70.389
27.9958	28.0705	28.2352	27.7336	27.888	28.0074	27.8481	27.9243	9	23	31.2935	41			0.361388	-0.0918374	-0.150593	P52209;K7EM49;K7EMN2;K7EPF6	P52209;K7EM49;K7EMN2;K7EPF6	6-phosphogluconate dehydrogenase, decarboxylating	PGD	53.139
25.725	25.8857	26.174	25.7076	25.7769	25.8137	25.7633	25.1091	8	17.2	29.2595	19			0.606971	-0.25735	-0.367244	Q9NV88;G3XAN1;H0YBK3;E5RG70;E5RK47;H0YBH8	Q9NV88;G3XAN1	Integrator complex subunit 9	INTS9	73.814
27.3615	27.8424	28.4645	28.4212	28.1098	28.0717	27.9317	26.9071	7	47.3	31.3174	47			0.287463	-0.267308	-0.301262	P56537;B7ZBH1;A0A0U1RQV5;F8WD20;A0A0B4J1Y7;F8WDS6	P56537	Eukaryotic translation initiation factor 6	EIF6	26.599
24.894	25.0271	25.8633	25.5828	25.1592	25.3137	25.2616	25.2181	8	26.8	28.686	40			0.173979	-0.103642	-0.141708	P43034;I3L3N5;I3L495	P43034;I3L3N5	Platelet-activating factor acetylhydrolase IB subunit alpha	PAFAH1B1	46.637
26.0918	26.264	26.1192	26.187	26.1301	26.2007	26.3581	25.9874	7	26.9	29.5879	48			0.0139214	0.00355005	0.00605696	P27797;K7EJB9;K7EL50	P27797;K7EJB9	Calreticulin	CALR	48.141
25.0689	25.1938	25.1128	25.271	25.1985	25.0123	25.2594	25.565	9	7	28.6029	39			0.337149	0.0972071	0.155983	Q7LBC6;H0Y9V5	Q7LBC6	Lysine-specific demethylase 3B	KDM3B	191.58
25.403	25.1226	25.5853	25.3516	25.1351	25.4255	25.1634	25.7376	10	19.6	28.749	43			0.000495826	-0.000252724	-0.000377458	H3BQZ7;Q1KMD3	H3BQZ7;Q1KMD3	Heterogeneous nuclear ribonucleoprotein U-like protein 2	HNRNPUL2-BSCL2;HNRNPUL2	84.69
26.2031	25.1448	25.1276	25.816	25.4827	25.4182	25.4683	25.6602	9	23.5	28.887	39			0.088306	-0.0655107	-0.0851394	Q14137;A0A075B729	Q14137	Ribosome biogenesis protein BOP1	BOP1	83.629
25.0325	25.1762	24.9898	25.3068	24.7987	25.1476	24.7475	25.4297	8	12.1	28.3964	33			0.217416	-0.0954151	-0.141262	Q5JTZ9	Q5JTZ9	Alanine--tRNA ligase, mitochondrial	AARS2	107.34
25.4274	25.0739	26.1348	25.6745	25.7266	25.5123	24.8631	25.2958	9	22.6	28.827	45			0.336942	-0.22817	-0.289076	Q15067;K7ELT1;I3L0T4;K7ENF1;K7ESC7;I3L2U4;I3L4S5	Q15067	Peroxisomal acyl-coenzyme A oxidase 1	ACOX1	74.423
27.4313	26.7548	26.9173	27.0222	26.5354	26.4403	26.8905	26.9374	7	23	30.2086	29			0.873166	-0.330495	-0.47844	Q9NR50;H0Y580;A0A0D9SEN0	Q9NR50	Translation initiation factor eIF-2B subunit gamma	EIF2B3	50.24
26.5078	26.536	25.9603	25.7833	27.2622	26.6103	26.9147	26.8854	9	15.9	30.0112	34			1.6712	0.72133	0.983737	Q9BYT8;E9PCB6;H0YAK4;H0YAF7	Q9BYT8;E9PCB6;H0YAK4	Neurolysin, mitochondrial	NLN	80.651
24.9774	25.2615	25.3598	25.5133	25.1815	25.7234	25.0862	25.1749	10	7.8	28.6426	33			0.0250163	0.013483	0.0197065	Q14146	Q14146	Unhealthy ribosome biogenesis protein 2 homolog	URB2	170.54
25.6487	25.4399	25.236	25.0588	25.5459	25.4245	25.3107	25.4375	11	13	28.7008	42			0.250874	0.0837803	0.131678	P11274;A9UF01;I3L1U8;I3L2P5;B7Z683;A0A0G2JQ41;A0A1C7CYZ0;Q12979	P11274	Breakpoint cluster region protein	BCR	142.82
27.3415	27.401	27.011	27.0356	26.8527	26.8851	26.9419	26.7972	10	24.4	30.3319	53			1.67717	-0.328043	-0.541584	Q9Y3I0	Q9Y3I0	tRNA-splicing ligase RtcB homolog	RTCB	55.21
27.5578	27.4622	28.0663	27.9175	27.9881	27.825	27.9541	27.7101	8	18.2	31.202	64			0.318893	0.118392	0.180148	P23246;H0Y9K7;H0Y9U2	P23246	Splicing factor, proline- and glutamine-rich	SFPQ	76.149
27.2508	27.2083	27.1046	27.1996	26.988	26.9076	26.892	27.0399	10	21.8	30.3499	52			2.62538	-0.233939	-0.428095	P52888;K7EP46;K7EIK4;K7EKB6;K7EMU4;K7EL32;K7EL02	P52888;K7EP46	Thimet oligopeptidase	THOP1	78.839
27.4302	27.5258	27.8945	27.8039	27.676	27.7213	27.5327	27.4094	7	24.1	30.986	37			0.243638	-0.0787373	-0.124724	P62424;Q5T8U3;Q5T8U2	P62424;Q5T8U3	60S ribosomal protein L7a	RPL7A	29.995
26.166	26.6382	26.273	26.2399	26.1215	26.4412	26.0042	26.2016	8	17.5	29.6016	27			0.436983	-0.137148	-0.21424	C9JIZ6;P07602;Q5BJH1;A0A0J9YXB8	C9JIZ6;P07602;Q5BJH1	Prosaposin;Saposin-A;Saposin-B-Val;Saposin-B;Saposin-C;Saposin-D	PSAP	58.44
28.2743	28.4564	28.7319	28.695	28.5176	28.6288	28.3896	28.4233	7	26.6	31.8825	55			0.158709	-0.0495949	-0.0799846	P46777;Q5T7N0	P46777	60S ribosomal protein L5	RPL5	34.362
30.191	30.0992	30.3637	29.994	29.6427	29.844	30.1702	29.9699	8	41.8	33.3472	69			0.963272	-0.255267	-0.401602	P62241;Q5JR95	P62241;Q5JR95	40S ribosomal protein S8	RPS8	24.205
27.0306	25.8213	26.621	25.9993	25.9133	25.7512	26.1476	25.8711	9	18.8	29.5107	31			0.754501	-0.447295	-0.565022	Q8TAT6;A0A0D9SFI9;I3L4U9	Q8TAT6	Nuclear protein localization protein 4 homolog	NPLOC4	68.119
26.2407	26.1075	26.7483	26.3429	27.3344	27.1534	27.3206	27.2851	11	24.6	30.2748	50			3.14026	0.913495	1.41803	P42166	P42166	Lamina-associated polypeptide 2, isoform alpha;Thymopoietin;Thymopentin	TMPO	75.491
26.7733	26.1118	26.717	25.4386	26.4672	25.8892	26.1236	26.8783	12	22.8	29.6594	49			0.0751755	0.0793967	0.0903118	P42224;J3KPM9;E7EPD2;D2KFR9;E7ENM1;H7BZB5;H7BZ88;E9PH66	P42224;J3KPM9	Signal transducer and activator of transcription 1-alpha/beta;Signal transducer and activator of transcription	STAT1	87.334
26.6756	26.9997	27.4327	27.3331	27.2812	26.9697	27.2207	26.7406	12	38.6	30.5874	58			0.0989528	-0.0572376	-0.0803862	Q9UNM6;A0A087WUL9;J3KNQ3;H0YD73;E9PL38;E9PPD2;E9PQG3	Q9UNM6;A0A087WUL9;J3KNQ3;H0YD73;E9PL38	26S proteasome non-ATPase regulatory subunit 13	PSMD13	42.945
24.2353	24.4628	24.9238	24.5836	24.1927	24.5327	24.3259	24.2663	9	7.4	27.7949	31			0.662487	-0.22195	-0.335717	J3QS41;P42694;A0A075B6R3;J3QRR8	J3QS41;P42694	Probable helicase with zinc finger domain	HELZ	219.05
29.3454	28.7241	29.3041	29.1638	28.9943	29.1134	29.2276	29.2608	8	41.8	32.4822	52			0.0327311	0.014677	0.0224253	P04406;E7EUT5	P04406;E7EUT5	Glyceraldehyde-3-phosphate dehydrogenase	GAPDH	36.053
26.7443	24.7354	26.1126	25.5497	25.5144	25.3444	25.7072	25.1617	12	9.5	29.0845	33			0.342434	-0.353595	-0.375236	O94822;H7BYG8;S4R3T2	O94822	E3 ubiquitin-protein ligase listerin	LTN1	200.55
27.0304	27.2165	26.6165	26.9091	26.46	26.286	27.0839	27.3011	13	32.3	30.1501	46			0.236923	-0.160398	-0.207249	P30837;A0A0U1RQK9;H0YKF9;P47895	P30837	Aldehyde dehydrogenase X, mitochondrial	ALDH1B1	57.206
25.2325	26.397	25.2266	25.4103	25.5496	25.8079	25.5608	25.588	9	10.3	29.0189	35			0.075136	0.0599942	0.0762676	J3KN36;A0A0G2JN29;A0A087X117;Q15155;P69849;Q5JPE7;A0A0G2JP90;A0A087WW46;H3BUC9;H3BPS9	J3KN36;A0A0G2JN29;A0A087X117;Q15155;P69849;Q5JPE7;A0A0G2JP90;A0A087WW46	Nodal modulator 1;Nodal modulator 3;Nodal modulator 2	NOMO3;NOMO1;NOMO2	139.38
26.1056	26.2654	25.9385	26.0546	25.8575	25.8537	26.0482	25.3242	11	20.8	29.215	47			0.965011	-0.320095	-0.477893	Q9BQ52;E7ES68;G5E9D5;H7C2I4;V9GYS7;V9GZ72	Q9BQ52;E7ES68;G5E9D5	Zinc phosphodiesterase ELAC protein 2	ELAC2	92.218
25.9312	26.6764	25.8119	26.8351	25.9186	25.4498	25.673	25.708	9	11.7	29.4421	37			1.1971	-0.626287	-0.807394	Q96T76;H0Y746;H0Y7V3;Q5T454;H7C1W5	Q96T76;H0Y746	MMS19 nucleotide excision repair protein homolog	MMS19	113.29
26.8362	27.2557	27.19	26.7119	26.5875	26.9466	27.1094	26.8875	8	24.1	30.2708	48			0.279287	-0.115679	-0.172208	O15371;B0QYA5;B0QYA4;B0QYA8;B0QYA6	O15371;B0QYA5	Eukaryotic translation initiation factor 3 subunit D	EIF3D	63.972
25.3914	25.4907	25.6083	25.2477	25.3482	25.2401	25.3383	25.1529	11	15.3	28.7191	41			0.941438	-0.164675	-0.279485	P00519;P42684	P00519	Tyrosine-protein kinase ABL1	ABL1	122.87
25.869	25.9045	25.8201	25.9081	25.8108	25.8238	25.623	25.6223	8	15.3	29.201	38			1.38954	-0.15548	-0.277718	H7C3P6;P52948;H0YCT1;H0YDF4	H7C3P6;P52948	Nuclear pore complex protein Nup98-Nup96;Nuclear pore complex protein Nup98;Nuclear pore complex protein Nup96	NUP98	85.676
26.7149	26.6901	26.7358	26.5859	26.7492	26.4717	26.7146	26.0763	13	22.9	29.934	51			0.518914	-0.178712	-0.271368	Q8N163;H0YB24;G3V119;E5RHJ4;A0A087X2B6;H0YC69;E5RGU7;E5RFJ3;H0YC58	Q8N163;H0YB24;G3V119	Cell cycle and apoptosis regulator protein 2	CCAR2	102.9
27.2316	26.6391	26.2788	26.4463	26.0035	25.9599	25.7351	26.7763	7	37.5	29.7108	39			0.867837	-0.530232	-0.656512	A6NFX8;Q9UKK9;A6NJU6;A6NCQ0;H0YEY4;C9JYY9	A6NFX8;Q9UKK9;A6NJU6	ADP-sugar pyrophosphatase	NUDT5	25.895
28.4316	28.36	27.9879	28.496	27.644	27.9471	27.8803	27.8849	7	22.2	31.3713	52			1.96376	-0.479805	-0.759289	P09622;E9PEX6;F8WDM5;F2Z2E3	P09622;E9PEX6	Dihydrolipoyl dehydrogenase, mitochondrial;Dihydrolipoyl dehydrogenase	DLD	54.177
25.9344	26.391	25.5597	26.732	25.4322	25.7055	24.9817	25.8677	9	25.6	29.2217	29			1.06034	-0.65748	-0.800096	B7WPG3;C9IYN3;D6W592;Q8WVV9;H7C464;C9JJZ7;H7BXH8	B7WPG3;C9IYN3;D6W592;Q8WVV9	Heterogeneous nuclear ribonucleoprotein L-like	HNRNPLL;HNRPLL	56.45
25.6998	26.0642	26.0851	26.0446	26.1654	26.383	26.0544	26.2503	8	16.8	29.4721	41			1.0871	0.23987	0.390108	Q9Y2X3;H7BZ72;F8WED0	Q9Y2X3;H7BZ72	Nucleolar protein 58	NOP58	59.578
25.6698	26.0269	25.9235	26.1094	26.1806	25.9064	26.4362	25.891	13	36.3	29.3577	40			0.484495	0.171188	0.259103	P35998;C9JLS9	P35998	26S protease regulatory subunit 7	PSMC2	48.633
27.9718	26.8775	27.6903	27.1758	28.1523	27.3397	26.7579	27.4998	9	21.7	30.7888	29			0.00761616	0.00859261	0.00978302	A0A0D9SFB3;A0A0D9SG12;A0A0D9SF53;O00571;O15523;A0A0J9YVQ7;A0A087WVZ1;A0A0J9YYH6;C9J8G5;C9J081;D6RCM4;Q9NQI0	A0A0D9SFB3;A0A0D9SG12;A0A0D9SF53;O00571;O15523	ATP-dependent RNA helicase DDX3X;ATP-dependent RNA helicase DDX3Y	DDX3X;DDX3Y	70.839
25.888	26.1983	25.7345	26.512	26.0577	25.71	25.6143	26.2286	9	23.9	29.4673	39			0.344069	-0.180541	-0.249039	P20700;E9PBF6;A0A0D9SFE5;A0A0D9SFY5	P20700;E9PBF6;A0A0D9SFE5	Lamin-B1	LMNB1	66.408
26.3659	25.8352	25.7975	25.8149	25.1439	25.4771	26.082	25.687	7	11.4	29.0943	32			0.724747	-0.355875	-0.480981	Q8IWA0;F8WE20;F8WC81	Q8IWA0	WD repeat-containing protein 75	WDR75	94.498
29.0365	28.8843	28.982	29.1858	28.3308	28.9174	28.6298	28.5396	7	37.6	32.2034	33			1.64716	-0.41778	-0.655844	P62937;F8WE65;C9J5S7;P0DN26;A0A0H2UH34;A0A0B4J2A2;A0A075B767;A0A075B759;Q9Y536;F5H284	P62937;F8WE65;C9J5S7	Peptidyl-prolyl cis-trans isomerase A;Peptidyl-prolyl cis-trans isomerase A, N-terminally processed;Peptidyl-prolyl cis-trans isomerase	PPIA	18.012
25.5538	25.1003	25.3551	25.1642	25.5625	25.6602	25.5191	26.0042	9	25.1	28.8504	33			1.40121	0.393157	0.604687	Q9Y230;M0R0Y3;X6R2L4;M0R0Z0	Q9Y230;M0R0Y3	RuvB-like 2	RUVBL2	51.156
24.7988	25.1622	24.6168	25.2411	25.4858	24.9206	25.1416	25.3615	9	9.7	28.4235	25			0.680513	0.272657	0.393102	Q9UQE7	Q9UQE7	Structural maintenance of chromosomes protein 3	SMC3	141.54
27.1646	26.8702	26.9932	26.8734	26.7762	26.5745	26.7104	26.626	8	18.3	30.1619	41			1.9873	-0.303568	-0.52121	O43252	O43252	Bifunctional 3-phosphoadenosine 5-phosphosulfate synthase 1;Sulfate adenylyltransferase;Adenylyl-sulfate kinase	PAPSS1	70.832
25.2416	24.8353	25.3832	25.1996	25.1559	25.0596	25.1655	25.0589	7	17.3	28.5418	33			0.177899	-0.0549622	-0.0886023	E9PEB5;Q96AE4;C9JSZ1	E9PEB5;Q96AE4	Far upstream element-binding protein 1	FUBP1	68.903
27.0282	27.0227	26.8111	26.8775	26.9101	26.6911	27.0045	27.0338	9	17.5	30.2187	38			0.0968037	-0.0250072	-0.0420628	Q12931;I3L0K7;I3L239	Q12931;I3L0K7	Heat shock protein 75 kDa, mitochondrial	TRAP1	80.109
25.7309	25.2766	25.3215	25.398	25.2791	25.645	25.4617	25.9847	7	35.5	28.9276	27			0.385627	0.160855	0.235759	M0QZS6;Q9UBE0;B3KNJ4;M0QX65;M0R375;M0QYM8;M0R054	M0QZS6;Q9UBE0;B3KNJ4;M0QX65	SUMO-activating enzyme subunit 1;SUMO-activating enzyme subunit 1, N-terminally processed	SAE1	29.422
27.5941	27.4067	26.9064	27.485	27.5291	27.235	27.6791	27.2996	9	38.1	30.7244	43			0.187087	0.0876451	0.12821	H0YH81;P06576;F8W079;F8W0P7;H0YI37	H0YH81;P06576;F8W079	ATP synthase subunit beta;ATP synthase subunit beta, mitochondrial	ATP5B	38.138
28.2903	28.4598	28.3292	28.2956	28.0582	28.1802	28.1293	28.1562	8	39.7	31.5759	41			2.37133	-0.212748	-0.388487	F8W1A4;P54819;F8VZG5;F8VY04;G3V213;F8VPP1	F8W1A4;P54819;F8VZG5;F8VY04;G3V213	Adenylate kinase 2, mitochondrial;Adenylate kinase 2, mitochondrial;Adenylate kinase 2, mitochondrial, N-terminally processed	AK2	25.63
28.8514	28.9262	29.076	28.9019	29.1655	29.12	29.0546	29.0024	7	21.8	32.3992	78			1.29693	0.14676	0.262002	P39023;G5E9G0;B5MCW2;H7C422;H7C3M2;F8WCR1;Q92901	P39023;G5E9G0;B5MCW2;H7C422;H7C3M2	60S ribosomal protein L3	RPL3	46.108
27.2703	26.8839	26.8974	27.0004	26.9179	26.4842	26.5911	27.0969	9	30.8	30.2433	54			0.6939	-0.240458	-0.359956	P31930	P31930	Cytochrome b-c1 complex subunit 1, mitochondrial	UQCRC1	52.645
24.8697	24.4775	24.5727	24.5439	24.5496	24.3242	24.9173	24.5822	9	9.1	27.9425	34			0.0530072	-0.0226154	-0.0347928	O60244;H7C3E5;H7C017	O60244;H7C3E5	Mediator of RNA polymerase II transcription subunit 14	MED14	160.6
28.6478	27.8039	27.9388	27.9445	28.3583	28.8972	28.6374	28.5205	9	36.5	31.8976	36			1.23822	0.519629	0.71972	Q96AG4;I3L223	Q96AG4	Leucine-rich repeat-containing protein 59	LRRC59	34.93
28.2042	27.9071	28.1266	28.436	27.7314	28.0444	27.9775	27.873	11	34.3	31.3934	63			1.05538	-0.261927	-0.416618	P41091;Q2VIR3;F8W810;H7BZU1	P41091;Q2VIR3;F8W810	Eukaryotic translation initiation factor 2 subunit 3;Putative eukaryotic translation initiation factor 2 subunit 3-like protein	EIF2S3;EIF2S3L	51.109
26.602	26.6431	26.811	27.231	26.1888	26.2129	26.228	26.0867	7	14	29.8857	30			2.3244	-0.642653	-0.992997	C9JIF9;P13798;H7C1U0;C9JLK2;H7C393;F8WEH5	C9JIF9;P13798;H7C1U0	Acylamino-acid-releasing enzyme	APEH	81.673
31.9552	32.4508	32.4398	32.3937	31.7034	31.8696	31.7496	31.3106	9	41.5	35.4463	70			2.06777	-0.651586	-0.973	G3V203;H0YHA7;J3QQ67;Q07020;F8VUA6;F8VYV2;A0A075B7A0	G3V203;H0YHA7;J3QQ67;Q07020;F8VUA6;F8VYV2;A0A075B7A0	60S ribosomal protein L18	RPL18	18.756
22.4484	25.1943	22.6462	22.3233	24.9472	24.9441	24.7739	24.9357	12	7.6	28.2585	17			1.36208	1.7472	1.47448	A0A0D9SFK2;Q92614;H0YEV9;A0A1B0GWJ6	A0A0D9SFK2;Q92614	Unconventional myosin-XVIIIa	MYO18A	231.1
26.2848	26.2412	25.6772	25.5663	25.0608	25.5562	25.6833	25.8716	11	13.1	29.1132	34			0.774811	-0.3994	-0.529191	G8JLG1;Q14683;V9GY57;H0Y7K8	G8JLG1;Q14683	Structural maintenance of chromosomes protein;Structural maintenance of chromosomes protein 1A	SMC1A	140.86
26.0006	25.3771	26.3962	25.8197	26.137	25.671	26.1256	25.7874	8	18.9	29.3046	43			0.0458667	0.0318375	0.0428879	P07237;H7BZ94;I3L398;I3L312;H0Y3Z3;I3L4M2;I3NI03;I3L3U6;I3L3P5	P07237;H7BZ94;I3L398;I3L312;H0Y3Z3	Protein disulfide-isomerase	P4HB	57.116
25.6832	25.4831	25.8752	25.6258	26.199	25.6732	25.69	25.4125	7	11.4	29.1541	48			0.161233	0.0768628	0.112457	H3BVG0;Q8N1F7;H3BMX0;H3BP95;H3BPA9;H3BNG7;H3BVE2;H3BNN5;H3BRD9;H3BRI8;H3BM93	H3BVG0;Q8N1F7	Nuclear pore complex protein Nup93	NUP93	99.554
25.7092	25.2722	25.6776	25.6572	25.3977	25.0486	24.7324	25.3698	9	12.2	28.6912	49			1.24997	-0.441917	-0.643064	Q02880;E9PCY5	Q02880;E9PCY5	DNA topoisomerase 2-beta;DNA topoisomerase 2	TOP2B	183.26
27.8825	27.6282	27.4626	27.5427	27.7655	27.5744	27.659	28.0184	7	20.3	31.0314	48			0.41928	0.125306	0.198111	Q9UQ80;F8VR77;H0YIN7;F8W0A3	Q9UQ80;F8VR77	Proliferation-associated protein 2G4	PA2G4	43.786
27.2494	27.5212	28.1835	27.451	27.6477	27.2365	27.7487	27.6597	8	30.5	30.9098	38			0.0420884	-0.0281391	-0.0384131	Q15084	Q15084	Protein disulfide-isomerase A6	PDIA6	48.121
25.3371	25.7294	25.3117	25.3228	25.6986	25.4858	25.4264	25.3396	10	13	28.774	33			0.192898	0.0623102	0.0993631	Q9NZB2;A0A0C4DH52;A0A0C4DG79;Q5T035	Q9NZB2	Constitutive coactivator of PPAR-gamma-like protein 1	FAM120A	121.89
27.364	27.1617	27.3801	27.1233	27.2707	26.9991	26.756	27.1929	8	27.9	30.5136	39			0.749675	-0.202615	-0.320182	P39748;I3L3E9;F5H1Y3	P39748;I3L3E9	Flap endonuclease 1	FEN1	42.592
25.9087	25.7211	25.7014	25.7906	25.7763	25.253	25.5568	25.5586	8	6.6	29.1159	41			1.08398	-0.244313	-0.395775	Q15058	Q15058	Kinesin-like protein KIF14	KIF14	186.49
25.9533	26.1625	25.9713	26.2051	26.0108	26.0732	26.2696	26.0452	9	14.3	29.4767	44			0.113746	0.0266304	0.0453759	P46087;F5H5X6;F5GWB7;F5H709;F5GYR3	P46087	Probable 28S rRNA (cytosine(4447)-C(5))-methyltransferase	NOP2	89.301
26.8846	26.3607	26.9374	26.6119	26.9439	26.8704	27.1771	26.8548	10	30.9	30.1612	43			0.866871	0.262925	0.402828	P30101	P30101	Protein disulfide-isomerase A3	PDIA3	56.782
25.775	26.8365	27.0459	26.5401	26.0769	26.7133	26.5154	26.3739	10	17.8	29.8383	47			0.161532	-0.129535	-0.160173	Q9Y678;D6RG17;H0Y8X7	Q9Y678	Coatomer subunit gamma-1	COPG1	97.717
26.9771	26.7814	27.0791	27.2547	27.0017	27.1987	26.8039	26.8546	9	50.2	30.3789	39			0.170195	-0.0583153	-0.0921651	P47756;B1AK85	P47756;B1AK85	F-actin-capping protein subunit beta	CAPZB	31.35
26.0613	25.9055	26.2536	26.8013	26.0456	26.0746	26.3826	26.5178	10	26.3	29.5626	53			0.000361422	-0.000247002	-0.00033962	O00425;F8WD15;F8W930;Q9Y6M1	O00425	Insulin-like growth factor 2 mRNA-binding protein 3	IGF2BP3	63.704
30.1459	30.4135	29.9526	29.5834	29.2094	29.5539	30.0696	29.0718	9	26.6	33.1636	46			0.99668	-0.547672	-0.699771	P07195;C9J7H8;A8MW50;F5H793	P07195;C9J7H8;A8MW50;F5H793	L-lactate dehydrogenase B chain;L-lactate dehydrogenase	LDHB	36.638
25.3865	25.2601	25.2852	24.6954	25.0616	25.16	25.1398	24.7313	12	13.4	28.4005	39			0.302952	-0.13364	-0.195024	Q13045;J3KS54;J3QLR6;K7EQZ7;J3QQQ2;J3KS39;K7EP37;K7EP27	Q13045	Protein flightless-1 homolog	FLII	144.75
29.6628	29.1048	29.6038	28.7534	29.076	28.8692	29.2307	29.8537	10	45.4	32.6212	51			0.0269196	-0.0237927	-0.0296424	H3BQN4;P04075;H3BPS8;J3KPS3;H3BUH7;H3BR04;H3BU78;H3BMQ8	H3BQN4;P04075;H3BPS8;J3KPS3;H3BUH7;H3BR04;H3BU78;H3BMQ8	Fructose-bisphosphate aldolase;Fructose-bisphosphate aldolase A	ALDOA	39.34
26.5893	26.4401	26.5718	26.7275	26.2595	26.1977	26.4591	25.9993	11	16.7	29.7116	53			1.71373	-0.353308	-0.577798	Q99575;E5RK39	Q99575	Ribonucleases P/MRP protein subunit POP1	POP1	114.71
28.9541	28.0797	28.3358	28.4903	27.8937	27.9833	27.9883	28.3741	10	32.3	31.5823	52			0.977542	-0.405152	-0.568571	P13489;E9PMJ3;E9PLZ3;E9PIM9;H0YCR7;E9PMN0;E9PIK5;E9PMA9;E9PR82;E9PMI1	P13489;E9PMJ3;E9PLZ3;E9PIM9;H0YCR7	Ribonuclease inhibitor	RNH1	49.973
26.7385	26.3712	26.8305	26.8668	27.1501	26.7924	26.7365	26.3657	8	8.2	30.1213	34			0.111977	0.0593948	0.0852688	I3L2C7;P57678;E7EN12;I3L4M4;I3L4A4;I3L399;I3L1J7	I3L2C7;P57678	Gem-associated protein 4	GEMIN4	118.82
26.1747	26.0884	26.4583	26.795	26.7484	26.3701	26.03	26.2177	10	23.3	29.7684	36			0.0602688	-0.0375638	-0.0521238	A0A087WZ13;E9PAU2;Q8IY67;K7EKR9;K7EQG2	A0A087WZ13;E9PAU2;Q8IY67	Ribonucleoprotein PTB-binding 1	RAVER1	77.843
27.3023	27.0705	27.1605	26.8903	27.1979	27.2644	26.9008	26.6951	8	27	30.4854	42			0.233154	-0.091363	-0.138809	P00390;H0YC68;E5RI06	P00390	Glutathione reductase, mitochondrial	GSR	56.256
25.7227	24.8437	25.6668	24.6225	25.2367	25.1248	25.434	25.2218	11	14	28.6066	51			0.0489746	0.0403924	0.0512052	O95155;B1AQ61;K7EP75	O95155	Ubiquitin conjugation factor E4 B	UBE4B	146.18
25.797	25.4507	25.8775	25.8599	25.3094	25.5	25.633	25.8917	13	12.3	28.9898	55			0.465005	-0.16273	-0.247309	A0A087WZV0;O43314;H0Y9S9;D6RBU4;A0A087WWN8;F8W9A8;B7WPL9;Q6PFW1;H7C436;H0Y9M0;K7ENU7;D6RFG4	A0A087WZV0;O43314	Inositol hexakisphosphate and diphosphoinositol-pentakisphosphate kinase 2	PPIP5K2	144.36
26.7466	26.4549	26.7993	26.8478	26.605	26.814	26.6784	26.5441	9	20.8	30.037	48			0.192912	-0.0517902	-0.0855145	P12081;B4DDD8;B3KWE1;E7ETE2;B4E1C5;D6RF05	P12081;B4DDD8;B3KWE1;E7ETE2;B4E1C5	Histidine--tRNA ligase, cytoplasmic	HARS	57.41
28.672	28.9229	28.6763	28.4304	28.7446	28.6774	28.7543	28.5554	9	27	32.0479	71			0.0233112	0.00755024	0.0123675	P37837;F2Z393;E9PM01;E9PKI8	P37837;F2Z393	Transaldolase	TALDO1	37.54
26.8815	26.8059	26.7415	26.7703	26.652	26.8533	26.7336	26.711	10	37	30.0444	45			0.559426	-0.0623078	-0.112882	P04083;Q5T3N1;Q5T3N0	P04083;Q5T3N1;Q5T3N0	Annexin A1;Annexin	ANXA1	38.714
26.2123	26.0284	26.1655	26.3647	26.4607	26.1851	26.1242	26.3778	12	13.3	29.5788	50			0.39223	0.0942149	0.155656	Q15021;E7EN77;F5GZK7	Q15021	Condensin complex subunit 1	NCAPD2	157.18
28.1905	27.1506	27.5754	28.1817	27.8276	27.2518	27.6397	27.4088	11	37.8	31.0621	40			0.372555	-0.242595	-0.309867	P04181	P04181	Ornithine aminotransferase, mitochondrial;Ornithine aminotransferase, hepatic form;Ornithine aminotransferase, renal form	OAT	48.534
27.2971	27.1199	27.6925	27.4881	27.9259	27.1437	27.285	26.9352	14	18.2	30.7303	49			0.116001	-0.0769472	-0.103061	A0A0G2JMG8;A0A0G2JLX3;J3KN39;A0A0G2JPQ2;Q9NX02;A0A0G2JLQ8;A0A0G2JP37;A0A0G2JNC8;A0A0G2JPB6;K7EMK2	A0A0G2JMG8;A0A0G2JLX3;J3KN39;A0A0G2JPQ2;Q9NX02;A0A0G2JLQ8;A0A0G2JP37;A0A0G2JNC8;A0A0G2JPB6	NACHT, LRR and PYD domains-containing protein 2	NLRP2	117.85
25.4934	26.0733	25.2946	25.6553	25.3389	25.6446	25.4389	25.8558	13	26.8	29.0102	44			0.109524	-0.0596075	-0.0849988	O00429;F8VZ52;B4DPZ9;F8W1W3;B4DDQ3	O00429	Dynamin-1-like protein	DNM1L	81.876
25.6876	26.1005	25.2923	25.69	25.536	25.3738	25.1992	25.1686	12	6.3	28.8671	42			1.04016	-0.3732	-0.544276	F5H269;Q9Y485;E7EMZ0	F5H269;Q9Y485	DmX-like protein 1	DMXL1	340.24
24.9964	24.6696	22.4835	24.6047	24.933	25.225	25.1435	25.2487	10	13.4	28.3913	18			0.81686	0.949028	0.879344	Q8N766	Q8N766	ER membrane protein complex subunit 1	EMC1	111.76
24.3739	24.4192	25.0446	25.008	25.2319	24.8223	24.9117	24.1507	13	5.6	28.0992	40			0.0841539	0.0677199	0.0855897	Q96Q15;J3KRA9;I3L0W2;E9PNP6;I3L400;Q6P435;H3BR09;H3BQN7	Q96Q15;J3KRA9	Serine/threonine-protein kinase SMG1	SMG1	410.5
25.3824	25.4853	25.3669	25.29	25.194	25.2598	25.1533	24.5718	12	11.6	28.6113	38			1.06389	-0.336403	-0.506516	Q5JWT2;Q9ULK4	Q5JWT2;Q9ULK4	Mediator of RNA polymerase II transcription subunit 23	MED23	157.11
26.1576	26.2861	26.1796	26.0975	26.4445	25.9668	26.1998	26.3337	12	22	29.5159	52			0.201255	0.0559878	0.0917734	G3V1J5;Q9Y2L1;F2Z2C0	G3V1J5;Q9Y2L1	Exosome complex exonuclease RRP44	DIS3	90.583
25.7291	26.0649	26.1903	25.6978	26.0269	26.1084	25.9352	25.4951	13	17	29.3064	39			0.0559918	-0.0291481	-0.0426419	O15294;C9JZL3	O15294	UDP-N-acetylglucosamine--peptide N-acetylglucosaminyltransferase 110 kDa subunit	OGT	116.92
23.9126	24.2626	24.9289	24.8767	25.025	24.6852	24.3143	24.9868	10	17.7	28.1089	31			0.378976	0.257635	0.323578	Q6PJG6	Q6PJG6	BRCA1-associated ATM activator 1	BRAT1	88.118
27.4842	27.6301	27.2518	27.2114	27.3495	27.2647	27.3055	27.1109	11	22	30.6726	54			0.573721	-0.136725	-0.223513	P28331;B4DJ81;F8WDL5;C9JPQ5	P28331;B4DJ81	NADH-ubiquinone oxidoreductase 75 kDa subunit, mitochondrial	NDUFS1	79.467
25.2855	25.7099	25.629	25.5252	25.2999	25.2456	25.2154	24.606	15	4.5	28.6783	59			1.26266	-0.445645	-0.648599	Q15751;H0YNB1;H0YMH0;H0YLG2	Q15751	Probable E3 ubiquitin-protein ligase HERC1	HERC1	532.22
27.4074	27.5149	27.2823	27.2722	27.2738	27.5048	27.39	26.9315	12	17.3	30.7068	48			0.287356	-0.0942044	-0.147996	P19367;B1AR62;B1AR61;Q2TB90	P19367	Hexokinase-1	HK1	102.48
25.3133	25.8498	25.8916	25.5194	25.7937	25.5835	25.7282	24.3532	18	8.8	28.9482	64			0.322327	-0.27886	-0.321658	H0Y4W2;F2Z2U4;Q9Y4A5	H0Y4W2;F2Z2U4;Q9Y4A5	Transformation/transcription domain-associated protein	TRRAP	405.8
25.2297	25.7702	25.6421	26.0303	25.6218	26.3718	25.4685	26.157	10	16.2	29.2602	27			0.379477	0.23669	0.306661	P49916;K7ERZ5;K7EQB6;K7ENR9	P49916	DNA ligase 3	LIG3	112.91
24.5242	24.4762	24.3187	24.8402	23.8388	24.1753	23.9115	23.6511	10	7.5	27.6755	28			2.24039	-0.645628	-0.987066	Q9UPY3;H0YJZ6	Q9UPY3	Endoribonuclease Dicer	DICER1	218.68
27.1677	26.9117	27.2876	27.3831	26.9135	27.3137	27.0654	26.8102	10	29.9	30.4378	41			0.493896	-0.161828	-0.249147	O00231;J3QRY4	O00231	26S proteasome non-ATPase regulatory subunit 11	PSMD11	47.463
24.2001	24.3737	24.336	24.2446	25.0557	25.0284	23.9428	24.3591	10	8.4	27.8779	28			0.517221	0.307887	0.397836	Q8WWQ0;H7C409;Q9NSI6	Q8WWQ0	PH-interacting protein	PHIP	206.69
25.1478	24.7085	25.5073	25.3527	25.2537	24.837	24.7904	24.9221	11	15.2	28.4068	44			0.51924	-0.22823	-0.324934	O60231;A0A140T947;Q5SQH5;A0A140T8Y5;A0A140T9T4;A2AB15	O60231;A0A140T947;Q5SQH5;A0A140T8Y5	Putative pre-mRNA-splicing factor ATP-dependent RNA helicase DHX16	DHX16	119.26
26.0034	26.8644	26.742	26.8379	27.7754	28.0911	27.8946	27.5959	8	32.9	30.8253	41			2.75773	1.22732	1.68249	Q9Y570	Q9Y570	Protein phosphatase methylesterase 1	PPME1	42.315
26.7851	26.7701	26.6836	26.9619	26.4552	26.5222	26.5668	26.5428	9	22.2	29.9997	45			2.3465	-0.27844	-0.494486	G3V0E4;O75439;F8WAZ6;F8WEA6;F8WBE1	G3V0E4;O75439	Mitochondrial-processing peptidase subunit beta	PMPCB	54.191
27.1624	26.5973	26.7045	26.7323	26.5902	26.6322	26.4626	27.2967	11	29.9	30.0652	51			0.0866737	-0.0537424	-0.0741388	P28838;H0Y9Q1	P28838;H0Y9Q1	Cytosol aminopeptidase	LAP3	56.166
26.0985	26.9719	26.0485	26.1537	26.641	27.1799	26.8706	26.0845	9	18	29.902	44			0.548837	0.375838	0.459202	A0A1B0GTB8;A0A1B0GWC0;A0A1B0GVF3;P23786;A0A1B0GV75;A0A1B0GTM0;A0A1B0GUD9;A0A1B0GTL9;A0A1B0GUB8	A0A1B0GTB8;A0A1B0GWC0;A0A1B0GVF3;P23786;A0A1B0GV75	Carnitine O-palmitoyltransferase 2, mitochondrial	CPT2	71.181
28.0884	28.4475	28.3414	27.9075	28.0585	28.1266	28.4816	27.2144	10	47.4	31.4345	49			0.325342	-0.225933	-0.284196	Q15181;Q5SQT6	Q15181	Inorganic pyrophosphatase	PPA1	32.66
25.8996	25.4101	25.0676	25.6232	25.5317	25.8701	25.5068	26.3086	12	16	29.0516	28			0.551244	0.30419	0.401929	Q15020;H0YHU8	Q15020	Squamous cell carcinoma antigen recognized by T-cells 3	SART3	109.93
25.0573	25.1087	25.7043	25.3222	25.2212	25.1735	25.2741	25.2896	14	12.8	28.652	43			0.149401	-0.0584979	-0.0900795	P41229;E9PFH2;Q9BY66;F8WF56;H7BZF9;C9JGA3	P41229	Lysine-specific demethylase 5C	KDM5C	175.72
26.2746	26.5663	26.37	26.9513	26.691	26.108	26.7234	26.4696	10	19.6	29.8576	48			0.0740208	-0.0425568	-0.060264	E9PDE8;O95757;D6RJ96	E9PDE8;O95757;D6RJ96	Heat shock 70 kDa protein 4L	HSPA4L	91.953
25.5812	26.204	26.4768	26.4815	25.7463	25.8803	25.4963	25.5414	13	15.7	29.2712	47			1.19018	-0.519767	-0.712035	Q8WUM0	Q8WUM0	Nuclear pore complex protein Nup133	NUP133	128.98
25.2889	25.3387	25.2395	25.5253	25.1131	25.06	25.1329	25.3979	10	22.6	28.5979	52			0.887248	-0.172102	-0.287788	Q8IY81	Q8IY81	pre-rRNA processing protein FTSJ3	FTSJ3	96.557
26.0442	25.4184	25.5937	25.2623	25.3232	25.4499	25.9042	24.9098	12	8.8	28.8301	55			0.286839	-0.18288	-0.238917	Q92538	Q92538	Golgi-specific brefeldin A-resistance guanine nucleotide exchange factor 1	GBF1	206.44
25.544	25.9705	25.8126	25.9113	26.0395	25.7743	26.084	26.1379	10	20.2	29.2646	49			0.797028	0.199325	0.31934	O43264;F5H3C1	O43264	Centromere/kinetochore protein zw10 homolog	ZW10	88.828
30.5658	30.6164	30.407	30.2837	29.7673	29.6453	29.8995	30.4218	9	56.8	33.5807	70			1.54051	-0.534737	-0.778389	Q06830;A0A0A0MSI0;A0A0A0MRQ5	Q06830;A0A0A0MSI0	Peroxiredoxin-1	PRDX1	22.11
26.0172	25.8371	25.9809	25.5562	25.6582	25.3326	25.7658	25.6981	13	13	29.0101	36			0.821683	-0.234205	-0.364664	E9PDP5;Q8IWZ3;H7C2F5;H3BLS9;D6RHC4;H0Y4P6	E9PDP5;Q8IWZ3	Ankyrin repeat and KH domain-containing protein 1	ANKHD1	166.74
27.4841	27.5814	27.1421	27.581	27.3827	27.4324	27.546	27.3096	9	26.5	30.7885	49			0.0931969	-0.0294995	-0.0479311	B4DJV2;O75390;A0A0C4DGI3;H0YIC4;F8VTT8;F8W4S1;F8W642;F8VZK9;F8VX07;F8VRP1;F8VX68;F8VWQ5;F8VPF9;F8VPA1;F8W1S4;H0YH82;F8W0J2;F8VP03;F8VRI6;F8VU34;F8VR34;F8W031	B4DJV2;O75390;A0A0C4DGI3	Citrate synthase;Citrate synthase, mitochondrial	CS	50.431
27.2875	27.5283	27.0823	27.679	27.1505	27.3166	26.2126	27.8616	9	36.7	30.6565	51			0.294724	-0.258965	-0.298556	P23381;H0YJP3;G3V277;G3V3H8;G3V3Y5;G3V4C7;G3V4N8;G3V5W1;G3V3S7;G3V3X0;G3V3P2;G3V227;G3V2Y7;G3V5H5;P78534;G3V4A3;G3V4Q0;G3V2F2;G3V3R3;G3V4S4;G3V313;G3V339;G3V2C0;G3V4N0	P23381	Tryptophan--tRNA ligase, cytoplasmic;T1-TrpRS;T2-TrpRS	WARS	53.165
26.0511	25.7227	26.052	25.8348	26.7634	26.9398	26.7056	26.7604	8	9.4	29.8509	52			4.00133	0.877138	1.47042	Q9HD20;H7C3H2	Q9HD20	Manganese-transporting ATPase 13A1	ATP13A1	132.95
26.7385	27.1261	26.2084	25.9913	26.3212	26.4646	26.4016	26.3063	10	26.3	29.7958	52			0.220184	-0.14267	-0.187849	Q5T6H7;Q9NQW7;Q5T6H3;Q5T6H2	Q5T6H7;Q9NQW7	Xaa-Pro aminopeptidase 1	XPNPEP1	62.138
26.9226	27.7757	26.4622	27.3498	26.7684	27.28	26.9325	27.3768	11	21.1	30.4898	64			0.0420101	-0.0382099	-0.046807	Q16822;H0YML5;B4DW73;A0A0A0MS74;H0YM31;H0YMU6;H0YNG4;H0YMA5	Q16822;H0YML5;B4DW73	Phosphoenolpyruvate carboxykinase [GTP], mitochondrial	PCK2	70.729
26.4604	26.2106	26.0471	25.5763	26.9149	26.222	26.7268	26.6195	12	16.5	29.7422	46			1.22009	0.547203	0.742622	D3DQV9;P78344;H0Y3P2;H0YCH5;H0YD77;E9PKF8;H0YE22;H0YEC5;H0YE44;H0YCF8	D3DQV9;P78344;H0Y3P2;H0YCH5	Eukaryotic translation initiation factor 4 gamma 2	EIF4G2	102.33
28.1891	28.0086	28.1823	27.6299	27.4787	27.7787	27.7133	27.7327	10	39	31.1765	58			1.16553	-0.326653	-0.504703	Q9GZL7	Q9GZL7	Ribosome biogenesis protein WDR12	WDR12	47.707
28.1543	28.0119	27.4079	27.6596	27.6157	28.1079	28.0428	28.1979	9	19.1	31.2634	61			0.372909	0.182645	0.256228	P26038	P26038	Moesin	MSN	67.819
25.7066	25.8068	25.612	25.9276	25.7204	25.7546	25.7369	25.8377	9	13.6	29.1459	59			0.00396925	-0.000862122	-0.0015058	Q5JRX3;A0A0A0MRX9;H0Y7L7;B1APQ0;H0Y4F7	Q5JRX3;A0A0A0MRX9	Presequence protease, mitochondrial	PITRM1	117.41
24.9222	24.9764	24.9245	25.8344	25.9581	26.1176	25.1171	25.8029	11	17.5	29.0211	35			0.951407	0.58458	0.71827	Q86Y56;H0Y650;E9PGY2;H7C3B1	Q86Y56;H0Y650	Dynein assembly factor 5, axonemal	DNAAF5	93.52
26.511	26.4654	26.4089	26.6105	26.0531	26.6323	26.5119	26.733	12	21.8	29.8766	37			0.036299	-0.0163822	-0.0249707	Q9BZE4;Q5T3R7	Q9BZE4	Nucleolar GTP-binding protein 1	GTPBP4	73.964
25.2632	24.9059	23.5874	24.7335	26.6418	25.8699	26.2431	25.7603	10	19.3	29.0786	23			1.96569	1.50626	1.64853	Q9Y4W6;K7EP56;B7Z651;A0A0U1RQN6;E9PHW9;I6L894;Q01484	Q9Y4W6	AFG3-like protein 2	AFG3L2	88.583
26.6216	26.4487	26.4304	26.4879	26.2035	26.437	26.7175	26.496	11	26.2	29.8259	49			0.108901	-0.0336175	-0.0547422	P00367	P00367	Glutamate dehydrogenase 1, mitochondrial	GLUD1	61.397
26.9164	26.7537	26.745	26.6903	26.9151	26.7171	27.1132	26.9024	11	16.1	30.2244	51			0.696696	0.135628	0.228155	Q99613;B5ME19;H3BPE3;H3BPE4;H3BTY8	Q99613;B5ME19	Eukaryotic translation initiation factor 3 subunit C;Eukaryotic translation initiation factor 3 subunit C-like protein	EIF3C;EIF3CL	105.34
26.6033	26.8528	27.4107	26.918	27.3268	27.5332	27.3525	27.3352	11	26.1	30.5377	60			1.33461	0.440712	0.651935	O00116;A0A1B0GWA2;B8ZZ81	O00116;A0A1B0GWA2	Alkyldihydroxyacetonephosphate synthase, peroxisomal	AGPS	72.911
27.5848	27.8306	28.3324	28.5722	28.1846	28.3225	27.9287	27.8677	9	24	31.4796	60			0.00550417	-0.00411606	-0.00548687	P00505	P00505	Aspartate aminotransferase, mitochondrial	GOT2	47.517
25.7831	25.7812	25.8529	25.8419	25.4331	25.435	25.4892	25.566	12	12.2	28.9766	51			4.0156	-0.333913	-0.622354	Q9P265	Q9P265	Disco-interacting protein 2 homolog B	DIP2B	171.49
26.5191	25.9316	26.335	26.3384	25.9433	25.8925	26.2026	26.1344	11	25.1	29.5192	66			0.819811	-0.237853	-0.368913	P13667	P13667	Protein disulfide-isomerase A4	PDIA4	72.932
25.7136	26.0784	25.9082	25.8916	25.8789	25.805	25.7812	25.4359	15	16.4	29.1892	48			0.673662	-0.172705	-0.276922	O00411;K7EMH3	O00411	DNA-directed RNA polymerase, mitochondrial	POLRMT	138.62
27.1535	27.2322	27.4896	27.2097	27.9434	28.3359	28.3249	28.3825	11	20.9	31.27	61			3.6073	0.97541	1.55748	P27824;D6RGY2;H0Y9Q7;D6RFL1;D6RB85;D6RDP7;H0Y9H1;D6RHJ3;D6RD16;D6RAQ8;D6RAU8	P27824	Calnexin	CANX	67.567
28.4691	27.7725	27.8881	27.9933	27.8132	27.9098	27.662	28.2445	13	39.7	31.2871	69			0.257154	-0.123387	-0.177158	Q9Y265;E7ETR0;H7C4G5;J3QLR1;H7C4I3	Q9Y265;E7ETR0	RuvB-like 1	RUVBL1	50.227
26.0165	26.0222	26.3006	26.5348	26.0622	26.4125	26.1983	25.7824	13	14.2	29.5571	42			0.232847	-0.10466	-0.15359	J3KR97;Q9BTW9;A0A0J9YWI5;A0A0J9YVR1;I3L439;I3L163;I3L120;A0A0J9YXU4;A0A0J9YVU1;I3L4D2;I3L3H4;I3L131;I3L143;I3L0V3;A0A0J9YYG2;I3L1S3;I3L500	J3KR97;Q9BTW9	Tubulin-specific chaperone D	TBCD	136.55
26.972	27.176	27.4039	27.1698	27.0728	27.0501	27.0669	27.2078	10	25.5	30.4588	61			0.367808	-0.0810275	-0.136066	P05455;E7ERC4;E9PFL9;E9PGX9	P05455;E7ERC4;E9PFL9;E9PGX9	Lupus La protein	SSB	46.836
27.874	28.5187	28.6197	29.0217	28.4044	28.8105	28.382	27.8751	12	30.9	31.8165	72			0.17945	-0.140537	-0.174508	P0DN79;P35520;C9JMA6;H7C2H4	P0DN79;P35520	Cystathionine beta-synthase	CBS	60.586
27.7568	28.0609	28.3736	28.372	28.3995	28.3639	28.2486	28.6221	13	38.7	31.6462	57			0.795584	0.267704	0.401339	P49411	P49411	Elongation factor Tu, mitochondrial	TUFM	49.541
27.9367	28.3147	28.671	28.8007	28.6366	28.4153	28.3273	27.8404	10	50.3	31.7769	61			0.193025	-0.125905	-0.166394	P60174;U3KQF3;U3KPZ0;U3KPS5	P60174	Triosephosphate isomerase	TPI1	30.791
30.7012	30.2936	30.9651	30.4474	31.1144	30.7906	30.8648	30.6009	12	34.6	34.0614	78			0.632307	0.240868	0.353338	P00338;F5GYU2;F5GXY2;F5GXH2;F5H5J4;F5H6W8;F5GZQ4;F5H8H6;F5GXC7;F5GWW2;F5GXU1	P00338;F5GYU2;F5GXY2;F5GXH2	L-lactate dehydrogenase A chain	LDHA	36.688
25.8699	25.7839	26.2431	26.0057	25.8677	25.929	25.8598	25.4243	16	9.5	29.244	37			0.63972	-0.205467	-0.314405	P50748;E7ES84;J3KQF2;H0YFL5	P50748	Kinetochore-associated protein 1	KNTC1	250.75
27.1334	26.9123	27.3089	27.3253	27.3859	27.4908	27.2718	26.4867	12	32.1	30.5948	52			0.015227	-0.0111623	-0.0149249	Q8N1G4	Q8N1G4	Leucine-rich repeat-containing protein 47	LRRC47	63.472
27.0089	27.0343	27.0475	27.3778	27.9988	27.9702	28.0123	27.7755	11	9.6	31.0176	56			3.67901	0.822062	1.36263	Q8TEM1	Q8TEM1	Nuclear pore membrane glycoprotein 210	NUP210	205.11
27.121	27.3063	27.3311	27.2238	27.5966	27.295	27.2432	27.2825	11	24	30.7828	69			0.533824	0.108793	0.183058	A0A087X0X3;P52272;M0R019;M0R0N3;M0R2T0;M0QZM1;M0R0Y6;M0QY96;M0R2I7;M0QYQ7;M0QYL3	A0A087X0X3;P52272	Heterogeneous nuclear ribonucleoprotein M	HNRNPM	77.569
26.8077	27.3249	27.6364	27.5436	27.0001	27.4577	27.506	26.9217	15	14.1	30.7176	77			0.173072	-0.106753	-0.144374	Q12769;G3V198;E9PR16	Q12769;G3V198;E9PR16	Nuclear pore complex protein Nup160	NUP160	162.12
25.6495	25.7226	25.4089	25.0148	25.3807	25.3736	25.4049	25.0517	12	9.9	28.6523	45			0.34852	-0.146203	-0.214933	O60318	O60318	Germinal-center associated nuclear protein	MCM3AP	218.4
25.9664	26.4444	25.6	26.3205	26.5024	25.9418	26.1103	26.2065	10	20.4	29.4967	38			0.1886	0.107464	0.148524	P08133;E5RK69;E7EMC6;H0YC77;E5RJF5;E5RK63;E5RFF0	P08133;E5RK69;E7EMC6	Annexin A6;Annexin	ANXA6	75.872
28.842	28.7828	28.2611	29.1926	28.4428	28.0561	28.5975	29.5084	9	52.9	32.1359	58			0.122029	-0.11845	-0.13731	P09211;A8MX94;A0A087X2E9;A0A087X243	P09211;A8MX94	Glutathione S-transferase P	GSTP1	23.356
27.0465	27.1133	26.7446	26.934	26.9963	26.5318	26.4065	27.183	10	19.8	30.1521	62			0.391379	-0.180212	-0.25681	P05771;I3L1Z0;H3BV73	P05771	Protein kinase C beta type	PRKCB	76.868
26.0624	26.5508	25.6286	26.6193	26.3043	26.1651	25.6709	26.3453	11	23.7	29.5751	53			0.126298	-0.0938897	-0.120576	Q53FZ2;H3BSM0;H3BVD5;H3BT38;H3BV29;H3BR33;H3BUF2	Q53FZ2;H3BSM0	Acyl-coenzyme A synthetase ACSM3, mitochondrial	ACSM3	66.152
25.13	25.6151	25.5572	24.9471	25.2346	25.2027	24.998	25.0225	13	12.6	28.6234	45			0.525377	-0.197893	-0.293696	Q92620;J3KTG2;J3KSA8;H3BMS7	Q92620	Pre-mRNA-splicing factor ATP-dependent RNA helicase PRP16	DHX38	140.5
26.7479	26.3455	26.7487	26.4936	27.3002	26.939	26.8536	27.2538	10	18.6	30.2373	47			1.81723	0.502732	0.773875	P04843;B7Z4L4;F8WF32	P04843;B7Z4L4	Dolichyl-diphosphooligosaccharide--protein glycosyltransferase subunit 1	RPN1	68.569
24.754	24.5253	23.7735	25.6467	26.4148	26.2838	26.0815	26.4726	10	17.2	29.242	37			2.21798	1.63826	1.82972	F5GZS6;J3KPF3;P08195;F5GZI0;H0YFS2;H0YFX4	F5GZS6;J3KPF3;P08195	4F2 cell-surface antigen heavy chain	SLC3A2	64.872
25.5919	26.2412	26.2338	26.5032	27.1297	27.1675	27.0179	27.1614	13	23.7	30.1328	46			2.59171	0.97658	1.40109	Q9UJS0;R4GN64	Q9UJS0	Calcium-binding mitochondrial carrier protein Aralar2	SLC25A13	74.175
27.6109	26.9733	26.9164	26.9556	26.9167	26.8683	27.0303	27.1903	11	39.2	30.4644	63			0.254781	-0.112642	-0.165456	G3V0I5;P49821;B4DE93;E9PLC6;E9PQP1;E9PMX3;E9PPR0;E9PJL9;H0YE81;E9PPD6;E9PPS5;H0YD04	G3V0I5;P49821;B4DE93;E9PLC6;E9PQP1;E9PMX3	NADH dehydrogenase [ubiquinone] flavoprotein 1, mitochondrial	NDUFV1	50.054
26.3506	26.2168	26.1461	26.1108	26.0715	25.7474	26.3587	26.6192	9	6.2	29.5451	45			0.0119051	-0.00688744	-0.00991104	A6NEM2;P51610;H7C1C4	A6NEM2;P51610	Host cell factor 1;HCF N-terminal chain 1;HCF N-terminal chain 2;HCF N-terminal chain 3;HCF N-terminal chain 4;HCF N-terminal chain 5;HCF N-terminal chain 6;HCF C-terminal chain 1;HCF C-terminal chain 2;HCF C-terminal chain 3;HCF C-terminal chain 4;HCF C-terminal chain 5;HCF C-terminal chain 6	HCFC1	213.47
26.058	25.9438	25.8813	26.1278	25.4257	26.0105	25.7532	25.835	10	28.2	29.2954	43			0.934133	-0.246633	-0.388707	P05091;S4R3S4;F8VP50	P05091	Aldehyde dehydrogenase, mitochondrial	ALDH2	56.381
26.384	26.4163	26.2314	26.3305	26.3479	26.3354	26.2527	26.3615	12	12.9	29.6791	43			0.128142	-0.0161424	-0.029495	Q9NTJ3;E9PD53;C9JR83;C9J578;C9JWF0;C9IYK2;C9JJ64	Q9NTJ3;E9PD53	Structural maintenance of chromosomes protein 4;Structural maintenance of chromosomes protein	SMC4	147.18
26.5918	26.0818	26.5191	26.2236	26.5009	26.309	25.8958	26.8182	9	12.7	29.7376	55			0.0410803	0.0268974	0.0369723	Q9Y5B9	Q9Y5B9	FACT complex subunit SPT16	SUPT16H	119.91
25.6207	25.4282	25.4843	25.6499	25.8499	25.3827	25.478	25.2132	12	13.3	28.8667	57			0.173863	-0.0648122	-0.100519	O75116;E9PF63;D6REE7;Q14DU5;C9JFJ0	O75116;E9PF63;D6REE7	Rho-associated protein kinase 2	ROCK2	160.9
27.2602	27.5065	27.5478	27.5684	27.5655	27.554	27.4918	27.2412	12	26.2	30.7944	54			0.0249344	-0.00759268	-0.0125695	P61221;D6R9I9;D6RGF4;H0Y990	P61221;D6R9I9	ATP-binding cassette sub-family E member 1	ABCE1	67.314
28.771	28.6866	28.5453	28.7806	28.7023	28.3746	28.6122	28.8923	9	53.1	32.0209	78			0.161457	-0.0505357	-0.0814447	O00299	O00299	Chloride intracellular channel protein 1	CLIC1	26.922
26.1299	26.1592	25.7812	25.936	25.9197	25.9321	25.8329	26.0837	15	17.2	29.2895	61			0.233641	-0.0594597	-0.0986441	Q96ST3;H3BP90	Q96ST3	Paired amphipathic helix protein Sin3a	SIN3A	145.17
26.0742	25.9341	26.3685	26.8657	27.3891	26.8547	27.8569	27.8904	11	22.7	30.4788	37			2.00999	1.18715	1.45033	Q16891;B9A067;H7C463;C9J406;D6RAW4;A0A087WYS0	Q16891;B9A067;H7C463;C9J406	MICOS complex subunit MIC60	IMMT	83.677
26.2363	25.9342	25.6192	25.7819	25.4788	25.6609	25.2702	26.2631	10	15.7	29.0707	41			0.392558	-0.224662	-0.299204	O60341;R4GMP9;R4GMQ1	O60341	Lysine-specific histone demethylase 1A	KDM1A	92.902
27.3894	27.6751	27.499	27.4822	27.9324	28.0226	27.5524	27.9386	9	23.6	31.1164	34			1.56193	0.350092	0.563918	Q9NZI8	Q9NZI8	Insulin-like growth factor 2 mRNA-binding protein 1	IGF2BP1	63.48
28.3122	28.3055	28.5405	28.6284	28.8175	28.2956	28.4079	28.7378	12	33.5	31.8504	64			0.335517	0.11805	0.181556	P34897;G3V2Y4;H0YIZ0;G3V5L0;G3V4W5;G3V2W0;G3V540;G3V241;G3V3Y8;G3V4T0;G3V4X0;G3V2E4;G3V2Y1;G3V3C6	P34897;G3V2Y4;H0YIZ0	Serine hydroxymethyltransferase, mitochondrial;Serine hydroxymethyltransferase	SHMT2	55.992
27.087	26.815	26.9927	27.1793	27.1329	27.1975	26.8062	26.3654	11	27.1	30.3362	63			0.289906	-0.142965	-0.202597	P04040	P04040	Catalase	CAT	59.755
27.6322	27.9208	27.8202	27.792	27.7424	28.1058	28.1636	27.8823	10	45.5	31.2517	56			0.786013	0.182248	0.296406	P30041	P30041	Peroxiredoxin-6	PRDX6	25.035
26.3683	26.5881	26.9496	26.9417	26.6938	26.5182	26.4611	26.4505	12	14.2	29.9427	62			0.550796	-0.18103	-0.277252	Q9H6R4;A0A0A0MRW6;A0A0C4DFX0	Q9H6R4;A0A0A0MRW6	Nucleolar protein 6	NOL6	127.59
26.9788	27.3639	27.0317	27.1957	28.307	28.6276	27.9388	28.0897	10	73.5	31.2623	34			3.1455	1.0982	1.63189	P69892;P69891;E9PBW4;A0A0J9YYA3	P69892;P69891;E9PBW4	Hemoglobin subunit gamma-2;Hemoglobin subunit gamma-1	HBG2;HBG1	16.126
25.6025	25.9889	25.7644	26.1914	26.0141	25.7513	25.5041	25.7024	10	16.1	29.1697	46			0.376788	-0.143832	-0.215911	Q15031;E9PHM2;C9IZR7	Q15031;E9PHM2	Probable leucine--tRNA ligase, mitochondrial	LARS2	101.97
27.9151	27.8045	27.9622	28.2103	28.0099	27.8109	27.8404	28.0347	9	28	31.3151	74			0.186268	-0.0490375	-0.0813061	E9PCY7;G8JLB6;P31943;E5RGV0;D6RIT2;D6RIU0;D6RBM0;E7EQJ0;D6RAM1;D6R9T0;D6RFM3;D6RDU3;D6RJ04;D6RIH9;E7EN40;H0YB39;D6R9D3;D6RF17;D6RDL0;E5RGH4;H0YBG7;H0YBD7;E5RJ94;H0YAQ2	E9PCY7;G8JLB6;P31943;E5RGV0;D6RIT2;D6RIU0;D6RBM0;E7EQJ0;D6RAM1;D6R9T0;D6RFM3;D6RDU3;D6RJ04;D6RIH9	Heterogeneous nuclear ribonucleoprotein H;Heterogeneous nuclear ribonucleoprotein H, N-terminally processed	HNRNPH1	47.087
29.7966	30.0607	29.6531	29.6775	29.5225	29.2418	29.0547	29.1475	10	30.1	32.8254	95			2.16544	-0.55537	-0.871035	P14866;M0QXS5;M0QYT0;M0R076;B4DVF8;M0R1W6	P14866;M0QXS5;M0QYT0	Heterogeneous nuclear ribonucleoprotein L	HNRNPL	64.132
26.6796	26.4476	26.6209	26.7886	26.4177	26.2164	26.3734	26.7457	14	26.2	29.9183	50			0.724573	-0.195875	-0.309897	P48147	P48147	Prolyl endopeptidase	PREP	80.699
26.2731	26.0333	25.8625	26.0826	25.7996	26.0192	26.2268	26.2097	10	20.9	29.4677	45			0.00237844	0.00093317	0.00147938	Q9BW92;U3KQG0;F6S7Q7;U3KQ50	Q9BW92;U3KQG0;F6S7Q7	Threonine--tRNA ligase, mitochondrial	TARS2	81.035
29.0761	29.0294	29.6013	29.5239	29.3845	29.3932	29.3736	29.3867	11	28.1	32.7064	66			0.205413	0.0768328	0.118498	P36578;H3BM89;H3BTP7;H3BU31	P36578;H3BM89	60S ribosomal protein L4	RPL4	47.697
25.9479	26.011	26.9039	26.2937	26.8976	26.8477	26.5614	26.6747	10	11.8	29.9371	38			1.01548	0.4562	0.623476	Q8TEX9;H0YN14;H0YN07;H0YMR4;H0YK93;H0YLV0;H0YL92;H0YKG5	Q8TEX9;H0YN14	Importin-4	IPO4	118.71
27.5477	27.0632	27.3401	27.483	26.7641	27.1726	26.844	27.5549	11	20.2	30.5226	65			0.622567	-0.274637	-0.386907	Q12788;J3KNP2	Q12788;J3KNP2	Transducin beta-like protein 3	TBL3	89.034
26.3393	26.4404	26.7623	26.6873	26.882	26.1652	26.7745	26.2701	10	20.1	29.8955	60			0.0592218	-0.0343227	-0.0486857	B0QY89;Q9Y262;B0QY90;C9JHP4;C9K0Q7;H7C3A0	B0QY89;Q9Y262;B0QY90	Eukaryotic translation initiation factor 3 subunit L	EIF3L	70.901
27.179	26.8994	27.1003	26.9527	26.7779	26.6078	26.5889	27.2071	11	14	30.2148	60			0.738718	-0.237412	-0.361066	Q92900	Q92900	Regulator of nonsense transcripts 1	UPF1	124.34
28.29	28.7675	28.8362	29.2273	29.1196	29.1197	28.6973	28.346	11	48.2	32.2455	63			0.0529971	0.0404177	0.0526183	P62258;K7EM20;B4DJF2;I3L3T1;I3L0W5;K7EIT4	P62258	14-3-3 protein epsilon	YWHAE	29.174
25.1682	25.7234	25.5196	26.3479	25.6381	25.8076	25.6865	25.39	14	9.3	29.0525	40			0.0814429	-0.0592456	-0.0776869	A6NIW2;Q5JSL3;A0A0J9YW64;A0A0J9YXQ7	A6NIW2;Q5JSL3;A0A0J9YW64	Dedicator of cytokinesis protein 11	DOCK11	238.1
27.636	27.6837	27.5482	27.3825	27.1159	27.1961	27.3227	27.599	11	29.4	30.7731	57			1.05593	-0.254175	-0.406788	P54578;A6NJA2	P54578;A6NJA2	Ubiquitin carboxyl-terminal hydrolase 14;Ubiquitin carboxyl-terminal hydrolase	USP14	56.068
26.3807	25.853	26.3185	26.3735	26.2905	26.3978	26.1035	26.2579	11	21.6	29.6361	53			0.0793933	0.0310049	0.0483903	Q9Y263;E5RIM3;H0YBW4;H0YC16;H0YAU9	Q9Y263;E5RIM3	Phospholipase A-2-activating protein	PLAA	87.156
27.2467	27.417	27.8901	27.7229	27.8416	27.7841	27.3898	27.3975	10	34	31.0969	55			0.0638244	0.0340576	0.0493904	O60506;F6UXX1	O60506	Heterogeneous nuclear ribonucleoprotein Q	SYNCRIP	69.602
28.4336	27.8036	27.9605	27.5721	27.5318	27.3289	27.431	27.6873	14	44	31.0317	75			1.19437	-0.447698	-0.641885	E9PKG1;H7C2I1;Q99873;A0A087X1W2;E9PQ98;E9PIX6;E9PNR9;H0YDE4;Q9NR22;E9PMW9	E9PKG1;H7C2I1;Q99873;A0A087X1W2;E9PQ98;E9PIX6;E9PNR9;H0YDE4	Protein arginine N-methyltransferase 1	PRMT1	37.709
26.5464	26.5535	26.6572	26.8008	26.651	26.5282	26.209	26.6878	14	19.6	29.9299	67			0.433139	-0.120458	-0.19304	Q9UNX4	Q9UNX4	WD repeat-containing protein 3	WDR3	106.1
27.8029	28.006	28.3926	27.5642	28.3027	27.6101	28.0953	27.767	13	27.5	31.3081	44			0.00336375	0.00237036	0.00322425	E7ERJ7;P11940;A0A087WTT1;E7EQV3;H0YBN4;H0YAR2;Q9H361;E5RH24;E5RJB9;H0YAP2;H0YB86;H0YAS6;H0YB75;Q4VXU2;E5RHG7;E5RGH3;H0YEQ8;B1ANR1;H0YAS7;H0YC10;E5RGC4;E5RFD8;Q5JQF8	E7ERJ7;P11940;A0A087WTT1;E7EQV3	Polyadenylate-binding protein;Polyadenylate-binding protein 1	PABPC1	67.138
27.8247	27.7491	28.1387	27.9618	27.8013	27.3694	27.773	27.5973	13	17.3	31.0855	62			1.13023	-0.28337	-0.448939	G5EA31;P53992;A0A0U1RR49	G5EA31;P53992	Protein transport protein Sec24C	SEC24C	111.98
26.5575	26.7309	26.3477	26.6064	26.3894	26.6218	26.3715	26.3409	12	31.1	29.895	54			0.597107	-0.129733	-0.215297	P09960;B4DEH5	P09960	Leukotriene A-4 hydrolase	LTA4H	69.284
28.4841	28.1557	28.4873	28.5925	28.3406	28.0322	28.2534	28.0306	13	21.8	31.746	62			1.12812	-0.265705	-0.426341	Q92973;S4R398;E7EW37	Q92973	Transportin-1	TNPO1	102.35
26.8801	27.5216	27.4279	27.4245	27.4761	27.5173	27.5792	26.7196	12	21.8	30.7241	63			0.0128625	0.00951767	0.0126974	P49915	P49915	GMP synthase [glutamine-hydrolyzing]	GMPS	76.715
26.3353	25.8215	26.4753	26.1095	25.8007	26.2403	26.0658	25.3197	18	6.9	29.3843	57			0.638101	-0.32876	-0.440615	Q70CQ2;A0A0C4DG73;H7C183;H7C150	Q70CQ2	Ubiquitin carboxyl-terminal hydrolase 34	USP34	404.23
27.3629	27.4173	27.5647	27.2444	27.1304	27.354	27.4129	27.273	14	26.1	30.6606	64			0.537392	-0.104778	-0.17749	Q99661;Q5JR91;Q5JR89;Q8N4N8	Q99661;Q5JR91;Q5JR89	Kinesin-like protein KIF2C;Kinesin-like protein	KIF2C	81.312
25.8419	25.7915	26.0982	25.5908	25.8374	25.4099	25.6344	25.4484	17	15.6	29.075	54			0.873033	-0.248107	-0.385717	Q7KZ85	Q7KZ85	Transcription elongation factor SPT6	SUPT6H	199.07
27.3922	27.4836	27.5683	27.606	27.382	27.5339	27.1465	27.1028	16	33.8	30.7271	58			1.01832	-0.221218	-0.361415	Q06187;U3NG26;Q5JY90	Q06187;U3NG26;Q5JY90	Tyrosine-protein kinase BTK;Non-specific protein-tyrosine kinase	BTK	76.28
25.6165	26.416	26.0508	25.9371	25.6174	25.8092	25.1334	25.5009	14	19.6	29.2149	42			1.18346	-0.489873	-0.682433	Q9HCE1;Q5JR04	Q9HCE1;Q5JR04	Putative helicase MOV-10	MOV10	113.67
27.5168	27.5525	27.6192	27.6532	27.4761	27.5543	27.7461	27.4622	12	18.1	30.8788	67			0.134122	-0.0257249	-0.0449467	Q9BXJ9;A0A0B4J1W3	Q9BXJ9;A0A0B4J1W3	N-alpha-acetyltransferase 15, NatA auxiliary subunit	NAA15	101.27
26.0144	26.8322	26.7217	26.74	27.0206	26.803	26.6443	26.4325	16	21.3	30.0609	64			0.269816	0.148048	0.203834	E7EX90;Q14203;Q6AWB1;E7EWF7;C9J1B7;C9JZA4;C9JTE5;C9JJN7;C9JJD0;C9JKG6;E9PCY0	E7EX90;Q14203;Q6AWB1	Dynactin subunit 1	DCTN1;DKFZp686E0752	139.09
26.5212	26.6237	26.754	26.6528	27.047	26.6155	26.9634	26.8884	17	15.9	30.1538	68			1.2089	0.240677	0.397794	Q14152	Q14152	Eukaryotic translation initiation factor 3 subunit A	EIF3A	166.57
26.9464	27.1259	27.0498	27.0824	27.6001	27.3611	27.084	26.5402	16	21.4	30.5013	63			0.158251	0.0952196	0.130243	O95782	O95782	AP-2 complex subunit alpha-1	AP2A1	107.54
26.9646	26.6756	26.6779	26.6858	26.9102	27.0686	26.6799	26.8164	13	30	30.3407	48			0.496624	0.11782	0.193664	P38606;C9JA17;C9JVW8	P38606	V-type proton ATPase catalytic subunit A	ATP6V1A	68.303
26.1221	26.1369	26.1618	26.36	26.2261	25.9491	25.8592	26.156	14	15.6	29.4189	49			0.699971	-0.147595	-0.245014	Q92878;E7ESD9;E7EN38;H7C0P8;C9JNH8	Q92878;E7ESD9;E7EN38	DNA repair protein RAD50	RAD50	153.89
27.6598	26.988	27.8425	27.4436	27.6441	27.9921	27.6019	28.1752	11	31.5	31.0424	48			0.797142	0.369833	0.506361	Q5STU3;Q13838;F6WLT2;A0A140T9X3;A0A0G2JJZ9;A0A140T996;A0A140T9X9;F6S4E6;A0A0A0MT12;F6TRA5;F6UJC5;A0A140TA18;A0A140T9L4;A0A140T973;A0A140T9K1;K7EN69;H0YCC6;H0Y400;F6QYI9;A0A0G2JJL7;F6R6M7;A0A140T9K2;A0A0D9SEM9;A0A140T9N3	Q5STU3;Q13838;F6WLT2;A0A140T9X3;A0A0G2JJZ9;A0A140T996;A0A140T9X9;F6S4E6;A0A0A0MT12;F6TRA5;F6UJC5;A0A140TA18	Spliceosome RNA helicase DDX39B	DDX39B	48.825
28.2628	28.4642	28.1789	28.0115	28.3879	28.2771	28.613	28.4065	10	23.5	31.7881	60			0.815025	0.191827	0.31075	P25705;K7EK77;K7ERX7;K7EQH4;K7EJP1;K7ENJ4;K7ESA0	P25705;K7EK77;K7ERX7;K7EQH4;K7EJP1	ATP synthase subunit alpha, mitochondrial	ATP5A1	59.75
26.6542	27.1634	27.2775	27.1703	27.4562	27.561	26.8978	27.3935	10	17.6	30.6021	46			0.608474	0.26081	0.370971	P17858	P17858	ATP-dependent 6-phosphofructokinase, liver type	PFKL	85.018
27.5619	27.4872	27.4289	27.4619	27.0912	27.0538	27.0671	27.286	12	23.9	30.6154	73			2.9699	-0.360418	-0.642123	Q99567;J3KMX1;I3L4K7;I3L2W3;I3L245	Q99567;J3KMX1	Nuclear pore complex protein Nup88	NUP88	83.541
25.7692	25.8269	25.836	26.0098	26.0974	26.0195	25.8078	26.2881	11	15.5	29.2872	59			0.865038	0.192702	0.314815	O60763;REV__R4GMN2;REV__Q5VZ89;REV__R4GNB2;REV__R4GN35	O60763	General vesicular transport factor p115	USO1	107.89
27.0309	26.7214	26.8248	26.9997	27.107	26.9636	27.0438	27.2141	13	19.9	30.3624	54			1.08162	0.1879	0.318266	P33992;B1AHB1;B1AHB2;B1AHA9	P33992;B1AHB1	DNA replication licensing factor MCM5;DNA helicase	MCM5	82.285
27.811	28.0575	27.7159	28.0671	27.6426	28.0662	27.7122	28.1952	12	19.2	31.2769	58			0.0186398	-0.00882769	-0.0133601	P51692;C9J4I3	P51692	Signal transducer and activator of transcription 5B	STAT5B	89.865
25.1961	25.5765	25.3677	25.5988	25.9407	25.931	25.5936	26.0629	13	10.3	29.0867	49			1.74653	0.447277	0.700508	Q9HBD4;A0A0A0MT49;P51532;P51531;A0A0U1RRG6;A0A0U1RQZ9;F6VDE0;A0A0U1RRF5;K7EP28;A0A0U1RRD6;A0A0U1RRF8;A0A0A0MSS5;F6UH26;A0A0U1RQU0;A0A0U1RR09;F6XE55;A0A0U1RQW7;A0A0U1RRN2;B1ALG1;A0A0U1RR83;A0A0U1RQX3;F6T8Q0;B1ALG2;A0A0U1RR26;B4DNT1;B1ALF6	Q9HBD4;A0A0A0MT49;P51532	Transcription activator BRG1	SMARCA4	188.15
29.6713	29.7613	29.5422	30.0279	29.5127	29.0284	28.9468	29.5257	12	43.4	32.9686	81			1.43823	-0.49729	-0.725503	P61978;Q5T6W2;S4R457;S4R359	P61978;Q5T6W2	Heterogeneous nuclear ribonucleoprotein K	HNRNPK	50.976
26.68	26.6353	26.7965	26.7111	27.4073	27.8716	28.0018	27.4234	14	18.8	30.73	46			3.08924	0.970283	1.47775	Q9BSJ8;F8VZB1	Q9BSJ8	Extended synaptotagmin-1	ESYT1	122.85
27.7951	27.3765	27.6115	27.4078	27.2028	27.2429	27.3469	27.5015	13	32.8	30.7386	58			0.972667	-0.224189	-0.362688	O14744;H0YJX6;G3V580;G3V2X6;H0YJ77;H0YJD3;G3V2L6;G3V5T6;H7BZ44;C9JSX3;G3V507;G3V2F5	O14744;H0YJX6	Protein arginine N-methyltransferase 5;Protein arginine N-methyltransferase 5, N-terminally processed	PRMT5	72.683
27.4886	27.4313	27.7103	27.4405	26.9987	27.1906	26.8158	27.4593	11	21.6	30.6563	62			1.41154	-0.401608	-0.615607	Q15046;H3BVA8;J3KRL2;H3BPV7	Q15046	Lysine--tRNA ligase	KARS	68.047
26.1443	25.8169	25.9905	25.8088	26.363	26.4182	26.1966	26.1458	11	36.7	29.5507	39			1.78752	0.34078	0.56503	Q9Y512	Q9Y512	Sorting and assembly machinery component 50 homolog	SAMM50	51.976
27.2255	27.4722	27.3111	27.8167	27.4508	27.3971	27.2225	27.8981	12	30.3	30.817	57			0.0654266	0.0357203	0.0514527	P54577;A0A0C4DGZ5	P54577;A0A0C4DGZ5	Tyrosine--tRNA ligase, cytoplasmic;Tyrosine--tRNA ligase, cytoplasmic, N-terminally processed;Tyrosine--tRNA ligase	YARS	59.143
27.2317	27.1176	27.3071	27.3021	27.0883	27.2649	27.063	27.2502	11	21.2	30.5228	58			0.481891	-0.0730376	-0.128392	F2Z2W7;Q8IZ69;H7C100;C9K041	F2Z2W7;Q8IZ69	tRNA (uracil-5-)-methyltransferase homolog A	TRMT2A	70.834
26.0271	26.4927	26.2496	26.3317	26.3537	26.1847	26.3582	26.0514	14	21.8	29.5625	67			0.116884	-0.0382829	-0.0615619	P50570;E5RHK8;Q9UQ16;K7EMQ3;E5RIK2;A0A1B0GUX5;A0A0D9SFB1;A0A0U1RQP1;A0A0D9SFE4;Q05193	P50570	Dynamin-2	DNM2	98.063
27.4109	27.0474	27.1534	26.9116	27.1195	27.0149	26.8544	27.5026	11	22.1	30.4961	58			0.0155588	-0.0079875	-0.0118567	Q14258	Q14258	E3 ubiquitin/ISG15 ligase TRIM25	TRIM25	70.973
27.8967	27.7449	28.2124	28.1035	28.1893	28.0674	28.0782	27.9977	14	21.3	31.4027	68			0.362766	0.0937667	0.153265	A0A0R4J2E8;A8MXP9;P43243;D6REM6;D6R991;H0Y8T4;Q68E03;D6RBK5	A0A0R4J2E8;A8MXP9;P43243;D6REM6;D6R991;H0Y8T4	Matrin-3	MATR3	94.622
29.3164	29.3023	29.4615	28.8695	29.3849	28.8403	29.2127	28.9865	12	35.2	32.5354	57			0.316346	-0.131373	-0.194452	P29401;A0A0B4J1R6;E9PFF2;F8W888	P29401;A0A0B4J1R6;E9PFF2	Transketolase	TKT	67.877
27.9072	28.1331	28.3005	28.4175	27.7944	27.9869	27.9898	27.8453	12	24.8	31.3946	47			1.24461	-0.285468	-0.459399	P30153;B3KQV6;C9J9C1;E9PH38;H0YDG7	P30153;B3KQV6;C9J9C1	Serine/threonine-protein phosphatase 2A 65 kDa regulatory subunit A alpha isoform	PPP2R1A	65.308
25.9249	25.6423	25.8442	26.1618	26.0477	25.9284	25.8926	25.6461	13	7.3	29.2983	56			0.0370451	-0.0146198	-0.0229667	O60287	O60287	Nucleolar pre-ribosomal-associated protein 1	URB1	254.39
29.1315	29.1323	29.429	30.0128	29.3832	29.0022	29.3723	28.7142	13	29.9	32.6777	80			0.545134	-0.308428	-0.404338	P23526	P23526	Adenosylhomocysteinase	AHCY	47.716
27.6574	27.6117	27.2795	27.5542	27.2533	27.2709	27.1502	27.464	15	17.3	30.7256	81			1.18527	-0.241107	-0.397166	P55265;H0YCK3	P55265;H0YCK3	Double-stranded RNA-specific adenosine deaminase	ADAR	136.06
26.4913	25.7127	25.8108	25.9396	26.0812	26.1715	26.1726	26.038	17	13.3	29.3935	57			0.301356	0.127197	0.187855	A0A087WY61;Q14980;F5H4J1;H0YFY6;F5H6Y5;F5H0Z7;F5H763;F5H2F3;F5H3L6;F5GWK2;F5H073;F5H068;F8W6T3;F5H1L0;F5GZW1;K4DIE0	A0A087WY61;Q14980	Nuclear mitotic apparatus protein 1	NUMA1	236.16
30.1173	30.0898	29.8853	29.9916	29.6355	29.3421	29.7779	30.2762	13	28.2	33.3229	81			0.618356	-0.263075	-0.374688	Q06203;D6RCC8;D6RE15	Q06203	Amidophosphoribosyltransferase	PPAT	57.398
28.0966	27.7269	28.2811	28.0157	27.978	27.9995	28.2255	28.2404	15	30.7	31.4918	81			0.242506	0.0807953	0.127184	P11021	P11021	78 kDa glucose-regulated protein	HSPA5	72.332
26.3895	26.5055	26.7432	26.4409	26.3536	26.4159	26.6034	26.0663	23	16.5	29.6886	79			0.546573	-0.159975	-0.251528	Q12789;H3BU37;H3BRD0	Q12789	General transcription factor 3C polypeptide 1	GTF3C1	238.87
27.9366	26.3956	26.4165	25.9809	26.4477	26.1782	25.6315	26.5066	12	13.4	29.9153	50			0.46861	-0.49136	-0.504444	Q14C86	Q14C86	GTPase-activating protein and VPS9 domain-containing protein 1	GAPVD1	164.98
26.6037	26.8118	27.0582	26.9308	27.0976	26.877	26.9757	26.5749	14	18.9	30.2984	59			0.0733269	0.0302076	0.0466429	P78347;A0A087WW90;A0A0D9SF80;A0A0A0MSY2;Q86UP8;Q6EKJ0	P78347	General transcription factor II-I	GTF2I	112.42
26.9757	26.7987	26.9004	26.6592	26.7136	26.3183	26.6861	27.3649	20	15.4	30.1841	66			0.101086	-0.0627975	-0.0862446	Q9H1A4;H0Y564;F8WAS1	Q9H1A4;H0Y564	Anaphase-promoting complex subunit 1	ANAPC1	216.5
28.75	28.6732	28.6553	28.4126	28.4087	28.5559	28.4182	27.808	18	24.9	31.8003	84			0.905793	-0.325098	-0.476713	O95373;E9PLB2;E9PLJ0	O95373	Importin-7	IPO7	119.52
25.7006	25.1886	25.2667	25.5128	25.5597	25.6248	25.3893	26.0478	15	13.9	28.9183	49			0.620903	0.23822	0.349089	O14646;H0Y8V4;A0A087WVF4;A0A1B0GTU9;O14647	O14646	Chromodomain-helicase-DNA-binding protein 1	CHD1	196.69
28.3822	28.0013	28.1103	27.7416	27.899	27.5676	28.106	27.6699	13	24	31.2296	67			0.667261	-0.248226	-0.365503	P23921;E9PL69;E9PP77;H0YCY7	P23921;E9PL69	Ribonucleoside-diphosphate reductase large subunit	RRM1	90.069
28.8531	29.0266	28.6851	29.0085	28.4817	28.5394	28.6647	28.9804	11	29.9	32.0866	87			0.827928	-0.2268	-0.356109	Q9P258	Q9P258	Protein RCC2	RCC2	56.084
25.8164	25.7334	25.6578	26.2174	25.8382	25.7043	25.7237	25.8215	11	21.2	29.201	54			0.269168	-0.0843258	-0.134027	P40763;G8JLH9;K7EP08	P40763;G8JLH9	Signal transducer and activator of transcription 3;Signal transducer and activator of transcription	STAT3	88.067
25.3196	25.4789	25.3899	25.7938	25.605	25.5758	25.3746	25.5714	11	24	28.8913	53			0.114622	0.03618	0.0586174	Q14684	Q14684	Ribosomal RNA processing protein 1 homolog B	RRP1B	84.427
28.5327	28.5202	28.5096	28.7511	28.5271	28.3631	28.5607	28.7136	12	47	31.9067	69			0.154989	-0.0372972	-0.0629806	P12277;G3V4N7;G3V461;H0YJG0	P12277;G3V4N7	Creatine kinase B-type	CKB	42.644
26.8105	26.7993	26.8669	26.6979	26.661	26.5802	26.5269	26.4072	12	23.7	29.9765	53			2.1058	-0.249853	-0.443156	O94776	O94776	Metastasis-associated protein MTA2	MTA2	75.022
27.9896	27.8189	27.7003	27.5215	27.713	27.5894	27.6436	28.0479	17	23.5	31.0495	69			0.0217429	-0.00910044	-0.0141632	P55060	P55060	Exportin-2	CSE1L	110.42
27.7518	27.9893	28.1933	27.9469	28.8171	29.0133	29.3009	29.132	11	33.2	32.0732	58			3.70427	1.09551	1.72191	P05141;Q9H0C2	P05141	ADP/ATP translocase 2;ADP/ATP translocase 2, N-terminally processed	SLC25A5	32.852
27.9992	29.3027	29.4865	30.2603	28.3621	29.5061	28.9487	29.0608	13	33.6	32.5955	73			0.223781	-0.292775	-0.285598	O43175;Q5SZU1	O43175;Q5SZU1	D-3-phosphoglycerate dehydrogenase	PHGDH	56.65
27.4509	27.0989	27.2624	26.8622	27.3041	27.4503	27.6654	27.5152	12	10.8	30.6645	76			1.13238	0.315137	0.488082	E7EX73;E9PGM1;E7EUU4;Q04637;C9JF13;C9J6B6;C9J2Z7;C9K073;H7C044;F8WCF2;C9JHW9;H7C0V6	E7EX73;E9PGM1;E7EUU4;Q04637;C9JF13;C9J6B6	Eukaryotic translation initiation factor 4 gamma 1	EIF4G1	158.64
27.0189	26.7127	27.0959	26.9182	27.2725	27.1697	27.0015	26.9154	12	20.6	30.3667	76			0.632225	0.15335	0.249071	P55884;C9JZG1;C9JQN7	P55884;C9JZG1	Eukaryotic translation initiation factor 3 subunit B	EIF3B	92.48
27.8744	27.737	27.7595	27.9323	28.817	28.649	28.6671	28.4629	12	54.8	31.7347	56			4.12368	0.823197	1.40432	P21796;C9JI87	P21796;C9JI87	Voltage-dependent anion-selective channel protein 1	VDAC1	30.772
25.6938	25.6875	25.6475	25.8295	25.8486	25.7646	25.9377	25.8631	14	6.1	29.1863	54			1.39729	0.138945	0.25116	P50851	P50851	Lipopolysaccharide-responsive and beige-like anchor protein	LRBA	319.1
27.4216	27.9379	27.2099	27.5854	27.3202	27.7547	27.8869	27.6989	17	32.3	30.9629	73			0.265543	0.126448	0.181695	K7EJE8;K7EKE6;P36776;K7ER27;K7ER56;K7ERR6	K7EJE8;K7EKE6;P36776	Lon protease homolog, mitochondrial	LONP1	93.296
27.0781	27.1802	27.0212	27.1779	26.8512	27.0172	26.7849	27.1536	13	25.1	30.3014	70			0.895097	-0.162572	-0.274659	A0A0A0MRA5;B7Z4B8;Q9BUJ2;M0R3F1;M0QYZ0;M0R203;M0QZV6;M0R0K8;M0QYI8;M0QYM5	A0A0A0MRA5;B7Z4B8;Q9BUJ2;M0R3F1;M0QYZ0	Heterogeneous nuclear ribonucleoprotein U-like protein 1	HNRNPUL1	85.939
30.6443	30.0977	30.011	29.9814	29.9912	29.6635	30.2516	30.2405	13	53	33.4312	82			0.295435	-0.146927	-0.207518	P40926;G3XAL0	P40926;G3XAL0	Malate dehydrogenase, mitochondrial;Malate dehydrogenase	MDH2	35.503
28.2988	28.4876	28.7428	28.7022	28.434	28.0907	28.0939	28.1244	11	18.3	31.6754	95			1.51364	-0.372083	-0.588474	Q9Y5L0;E9PFH4;C9J7E5	Q9Y5L0;E9PFH4;C9J7E5	Transportin-3	TNPO3	104.2
27.2103	27.3764	27.2967	27.6329	27.1811	27.1717	27.0326	27.0546	13	16.2	30.5586	52			1.45924	-0.269094	-0.449236	Q9UIA9;E7ESC6;H0YBE1;E5RIW1;A0A087WTZ2;Q9H2T7	Q9UIA9;E7ESC6	Exportin-7	XPO7	123.91
27.7642	27.5524	27.4022	27.3877	27.623	27.2701	27.5186	27.3211	15	23.9	30.789	60			0.330051	-0.0934448	-0.150584	P07384;E9PLX0;E9PJJ3;E9PLC9;E9PMC6;E9PJA6;E9PSA6;E9PQB3;E9PRM1;E9PL37;E9PIA9	P07384	Calpain-1 catalytic subunit	CAPN1	81.889
31.15	31.0319	31.0827	30.9093	31.5164	31.3014	31.4051	31.5417	12	36.3	34.6894	106			2.73645	0.397673	0.691518	A0A087WVQ9;Q5VTE0;P68104;A0A087WV01;Q05639;A6PW80;Q5JR01	A0A087WVQ9;Q5VTE0;P68104;A0A087WV01	Putative elongation factor 1-alpha-like 3;Elongation factor 1-alpha 1;Elongation factor 1-alpha	EEF1A1;EEF1A1P5	47.883
26.5869	26.2371	26.2699	25.959	26.6542	26.0939	26.5142	26.8235	14	14.9	29.7097	70			0.604746	0.258187	0.367776	P49790	P49790	Nuclear pore complex protein Nup153	NUP153	153.94
27.7268	27.7982	27.9432	27.5612	27.5125	27.6896	27.4624	27.3217	12	24	30.9686	74			1.25788	-0.260817	-0.427662	P17655	P17655	Calpain-2 catalytic subunit	CAPN2	79.994
28.2747	28.8333	29.0315	29.0699	28.3121	28.9244	28.6616	28.9041	15	33	32.1554	71			0.169759	-0.101827	-0.139054	Q5T5C7;P49591	Q5T5C7;P49591	Serine--tRNA ligase, cytoplasmic	SARS	61.312
27.4898	27.6755	27.5601	27.5128	27.7035	27.5075	27.6804	27.456	17	22.3	30.8815	69			0.139041	0.0272956	0.0475264	P43246;E9PHA6;C9J809	P43246;E9PHA6	DNA mismatch repair protein Msh2	MSH2	104.74
28.8163	28.8912	28.8732	28.7139	29.0219	28.6836	28.2909	28.9386	14	26.9	32.0654	85			0.211926	-0.0899024	-0.134383	O43390;B4DT28	O43390;B4DT28	Heterogeneous nuclear ribonucleoprotein R	HNRNPR	70.942
27.0089	27.2715	27.3518	27.5971	27.3651	27.3814	26.9844	26.9864	13	45	30.603	76			0.33031	-0.128017	-0.192496	P61158;B4DXW1;F8WDR7;F8WEW2;F8WE84;A0A0A0MTI9;H7C4J1;C9IZN3;Q9C0K3;Q9P1U1	P61158;B4DXW1	Actin-related protein 3	ACTR3	47.371
28.6314	28.8866	28.7508	28.9267	28.994	29.0526	28.8679	28.9274	12	17.3	32.2566	90			1.07209	0.161608	0.279435	P19338;H7BY16	P19338;H7BY16	Nucleolin	NCL	76.613
25.5997	25.412	25.7635	25.6504	25.5453	25.5565	25.6545	25.5662	22	8.5	28.9589	78			0.124665	-0.0257821	-0.04465	Q7Z6Z7;H0Y659;A0A087X1S3;A0A087X146	Q7Z6Z7	E3 ubiquitin-protein ligase HUWE1	HUWE1	481.89
25.0877	25.1579	25.3036	25.3796	25.4643	25.1812	25.4456	25.292	14	6.6	28.6553	69			0.561057	0.113582	0.191049	P21359;J3KSB5;H0Y465;J3KRT8;J3QQN8;J3QSG6;K7EP94;J3QLS2	P21359;J3KSB5;H0Y465	Neurofibromin;Neurofibromin truncated	NF1	319.37
26.8213	26.8547	26.5504	26.4196	26.395	26.334	26.4445	26.8102	14	21.7	29.9002	58			0.504185	-0.16558	-0.254572	P35606;D6RBZ7;D6RCL6;D6RBG7;D6RBT6;D6R997;H0YAC7;H0Y938	P35606	Coatomer subunit beta	COPB2	102.49
29.2317	29.2838	29.3989	28.8473	28.966	29.2473	29.2018	28.6581	15	36.2	32.47	67			0.424027	-0.172125	-0.253003	J3KTA4;P17844;J3QSF1;J3KRZ1;J3QRQ7;J3KRX8;X6RLV5;J3QR02;J3QRN5	J3KTA4;P17844	Probable ATP-dependent RNA helicase DDX5	DDX5	69.086
26.4796	27.2484	27.1738	27.0503	27.1401	26.7929	27.1591	26.3616	16	12.1	30.2874	92			0.191405	-0.124588	-0.164831	Q5SRE5;H7C4K7	Q5SRE5	Nucleoporin NUP188 homolog	NUP188	196.04
27.341	27.4569	27.571	27.6546	27.4868	27.4329	27.2957	27.4792	18	23.8	30.8112	78			0.454243	-0.0822296	-0.141435	Q13200;C9JPC0;H7C2Q3;H7C1H2;F8WBS8	Q13200	26S proteasome non-ATPase regulatory subunit 2	PSMD2	100.2
26.4649	26.6176	26.3872	25.8161	26.2916	26.5277	26.2604	26.4282	17	21.2	29.6778	62			0.110579	0.0555029	0.0809331	O75717;C9JYB3	O75717	WD repeat and HMG-box DNA-binding protein 1	WDHD1	125.97
28.9397	29.197	29.5308	29.6139	29.2749	29.536	29.3505	28.4524	15	37.7	32.6974	105			0.235961	-0.16692	-0.212347	H0Y4R1;P12268;E7ETK5	H0Y4R1;P12268;E7ETK5	Inosine-5-monophosphate dehydrogenase 2	IMPDH2	50.957
27.219	26.6599	26.5993	26.9918	26.7619	26.5716	26.5884	26.8059	17	15.4	30.1598	63			0.548805	-0.185567	-0.282342	Q9H2M9;F8WDJ2;H7C4Y9	Q9H2M9	Rab3 GTPase-activating protein non-catalytic subunit	RAB3GAP2	155.98
26.236	26.3939	26.2623	26.0246	27.1575	27.368	27.0033	27.3791	13	21.9	30.2713	52			3.81891	0.99776	1.61366	Q6NUQ4;H7C085;H7C008;H7C0H8;H7BZI0	Q6NUQ4	Transmembrane protein 214	TMEM214	77.15
26.5796	26.81	27.1109	26.8021	27.3243	27.1159	26.9605	27.4466	14	14.3	30.3864	66			1.34123	0.386153	0.590877	Q9BQG0;I3L1L3;I3L2H8	Q9BQG0;I3L1L3	Myb-binding protein 1A	MYBBP1A	148.85
27.2516	27.2098	27.2309	27.2681	26.9901	26.9021	26.8813	27.3134	14	37	30.4781	67			1.13383	-0.218382	-0.363467	Q9UBT2;K7EPL2;K7ESK7;U3KQ93;U3KQ55;K7ES38	Q9UBT2;K7EPL2	SUMO-activating enzyme subunit 2	UBA2	71.223
28.7658	28.9446	28.6359	29.0959	28.5212	28.6558	28.5778	28.7374	13	53.6	32.0013	72			1.11547	-0.23751	-0.388575	P62136;E9PMD7;F5H1L6;F5H037	P62136;E9PMD7	Serine/threonine-protein phosphatase PP1-alpha catalytic subunit;Serine/threonine-protein phosphatase	PPP1CA	37.512
28.0441	28.0019	27.7518	27.8854	28.0813	27.9767	27.7967	28.0604	13	15.2	31.2486	74			0.257869	0.0579977	0.0979462	Q13423;E9PCX7;D6RHU2;D6RAI5;H0Y8P5;D6RCR6	Q13423;E9PCX7	NAD(P) transhydrogenase, mitochondrial	NNT	113.89
29.1836	29.0761	29.3696	29.3847	29.122	29.4124	29.2073	28.9185	13	53.9	32.5659	79			0.291341	-0.0884404	-0.141122	P63244;J3KPE3;H0YAF8;D6RAC2;H0Y8W2;H0YAM7;D6REE5;D6RFX4;D6R9Z1;D6R9L0;H0Y8R5;D6RBD0;D6RFZ9;D6RAU2;E9PD14;D6RGK8;D6RHJ5;D6R909;D6RDI0	P63244;J3KPE3;H0YAF8;D6RAC2;H0Y8W2;H0YAM7;D6REE5;D6RFX4;D6R9Z1;D6R9L0	Guanine nucleotide-binding protein subunit beta-2-like 1;Guanine nucleotide-binding protein subunit beta-2-like 1, N-terminally processed	GNB2L1	35.076
28.2955	28.1311	27.9201	28.2055	27.7923	28.0137	27.9846	28.1693	14	19.8	31.3689	77			0.634893	-0.148085	-0.242234	P33991;E5RFJ8;E5RG31	P33991	DNA replication licensing factor MCM4	MCM4	96.557
27.6568	27.2069	27.5995	27.6481	27.772	27.9276	27.4002	27.8376	18	15.9	31.0083	81			0.620582	0.206498	0.31374	P11388;J3KTB7	P11388	DNA topoisomerase 2-alpha	TOP2A	174.38
24.1144	25.1142	24.929	25.0427	25.3633	26.2149	25.3773	25.4537	14	13	28.8227	47			1.38607	0.802177	0.990957	Q9H6S0;D6RA70;D6RF50;D6R9T8	Q9H6S0	Probable ATP-dependent RNA helicase YTHDC2	YTHDC2	160.25
26.8923	27.4489	27.4183	27.2006	27.1304	27.2025	27.1816	27.2463	16	28.9	30.5855	78			0.145108	-0.0498471	-0.0790402	Q01780;K7EJ37	Q01780	Exosome component 10	EXOSC10	100.83
28.6544	28.8366	28.8309	28.8779	28.2326	28.7799	28.7083	28.4591	15	33.1	32.1025	87			0.973323	-0.25497	-0.401987	P13010;C9JZ81	P13010	X-ray repair cross-complementing protein 5	XRCC5	82.704
26.4746	26.5829	26.535	26.1323	26.5605	26.1967	26.2123	25.9018	16	19.7	29.7	53			0.595656	-0.213351	-0.318896	M0R2B7;P28340;M0QZR8;M0QXE6;M0QZB4;M0QXQ2;M0R3H8;M0R2I8;M0R2J2	M0R2B7;P28340;M0QZR8	DNA polymerase;DNA polymerase delta catalytic subunit	POLD1	126.39
27.8491	27.4818	27.5772	27.4433	27.4499	27.2366	27.1408	27.3738	14	21.4	30.7742	72			1.33692	-0.287553	-0.467825	P25205;J3KQ69;Q7Z6P5	P25205;J3KQ69	DNA replication licensing factor MCM3	MCM3	90.98
28.539	28.4004	28.0092	27.8885	28.0539	27.8781	28.1574	28.8173	13	27.2	31.6006	80			0.0230463	0.0173736	0.0229478	Q13263;M0R0K9;M0R2I3;M0R3C0	Q13263;M0R0K9	Transcription intermediary factor 1-beta	TRIM28	88.549
28.3201	28.8353	28.4777	29.1732	28.2653	28.2777	28.3403	28.0971	15	30.4	31.8232	88			1.22011	-0.456462	-0.654357	P41250	P41250	Glycine--tRNA ligase	GARS	83.165
29.2093	29.5797	29.6969	29.8944	29.7118	29.4908	29.7036	29.621	13	36.5	33.0072	68			0.0871217	0.0367169	0.0562354	P60842;J3QS69;J3KT12;J3QL43;J3KSZ0;J3KTN0;J3QKZ9;J3KS25	P60842;J3QS69;J3KT12;J3QL43;J3KSZ0	Eukaryotic initiation factor 4A-I	EIF4A1	46.153
26.0437	26.4618	26.188	26.2305	26.3221	26.5089	26.2725	26.121	16	15.8	29.589	65			0.26144	0.0751247	0.121569	A0A0A0MRM8;A0A0D9SGC1;E7EW20;Q9UM54;Q5JVM0	A0A0A0MRM8;A0A0D9SGC1;E7EW20;Q9UM54	Unconventional myosin-VI	MYO6	145.01
28.2775	28.1361	27.5921	28.3365	28.1238	28.0137	28.082	28.4254	14	27.8	31.5124	90			0.150027	0.0756845	0.109279	P38646;H0Y8S0;D6RA73;D6RJI2;H0YBG6	P38646	Stress-70 protein, mitochondrial	HSPA9	73.68
26.9558	27.0763	26.9531	27.1311	26.9334	26.5918	26.9451	26.9421	15	19.6	30.2481	76			0.912746	-0.17598	-0.294349	Q9H0D6	Q9H0D6	5-3 exoribonuclease 2	XRN2	108.58
31.5384	31.6149	31.6893	31.7328	31.8144	31.5796	31.6266	31.4878	17	54.6	35.0488	122			0.0742038	-0.0167503	-0.028832	P06733;K7EM90;P13929;K7ERS8;E5RI09;E5RG95;K7EPM1;K7EKN2;E5RGZ4	P06733	Alpha-enolase	ENO1	47.168
28.8293	29.1123	29.0968	29.2953	29.0514	29.2072	29.1471	28.9179	15	30.9	32.5764	99			0.00739268	-0.00253248	-0.00411891	E7ENZ3;P48643;B7ZAR1;E9PCA1;D6RIZ7;H0Y914	E7ENZ3;P48643;B7ZAR1;E9PCA1	T-complex protein 1 subunit epsilon	CCT5	53.848
28.8291	28.8797	29.1132	28.9995	28.7879	28.9662	28.6543	28.3664	16	38.6	32.2138	76			0.94322	-0.261635	-0.407843	P22234;E9PBS1;D6RF62	P22234;E9PBS1;D6RF62	Multifunctional protein ADE2;Phosphoribosylaminoimidazole-succinocarboxamide synthase;Phosphoribosylaminoimidazole carboxylase	PAICS	47.079
28.0093	28.0048	28.2046	27.9387	28.0837	28.0255	27.8381	27.6968	16	35.1	31.3025	94			0.569059	-0.128308	-0.211891	P11413;E7EUI8;E9PD92;E7EM57	P11413;E7EUI8;E9PD92;E7EM57	Glucose-6-phosphate 1-dehydrogenase	G6PD	59.256
28.1967	27.9136	28.2187	27.8859	27.9689	27.9911	28.1604	28.1591	16	23	31.4156	68			0.0550243	0.0161324	0.026741	P52789;E9PB90;P52790	P52789;E9PB90	Hexokinase-2;Hexokinase	HK2	102.38
28.0926	28.2843	28.4789	27.7902	28.0739	27.6947	27.8494	27.9132	19	19.7	31.3301	84			0.838626	-0.278724	-0.418237	B1AKJ5;O43847;G3V1R5;F5H7V1;H0Y5G9	B1AKJ5;O43847;G3V1R5;F5H7V1	Nardilysin	NRD1	139.41
27.696	27.158	27.8286	27.4392	27.4139	27.1085	27.6693	27.0343	15	18.1	30.7753	73			0.490509	-0.223967	-0.316285	K7EIG1;Q9Y5I4	K7EIG1		CLUH	140.49
27.9613	28.1656	27.9697	28.6003	28.1789	28.1353	28.1911	28.0149	15	23.3	31.5033	90			0.104966	-0.0441504	-0.0674086	P54886	P54886	Delta-1-pyrroline-5-carboxylate synthase;Glutamate 5-kinase;Gamma-glutamyl phosphate reductase	ALDH18A1	87.301
28.7987	28.7661	28.6382	28.6912	28.5739	28.6135	28.6338	28.7713	16	27.3	32.004	86			0.641916	-0.0754108	-0.135586	P33993;C9J8M6	P33993	DNA replication licensing factor MCM7	MCM7	81.307
26.8072	26.7717	26.722	26.9135	26.9744	26.6281	26.8113	26.8454	18	9.7	30.1939	76			0.047737	0.0112176	0.0192678	Q8N3C0;J3KNJ4;E5RFZ0	Q8N3C0	Activating signal cointegrator 1 complex subunit 3	ASCC3	251.46
27.0083	26.8535	26.6067	26.9772	26.6257	26.5901	26.7512	26.6707	20	12.1	30.1399	75			1.07527	-0.201965	-0.337933	A2RRP1;H0Y5G7;C9JCM7;H7BZR3;H7BZU5	A2RRP1;H0Y5G7	Neuroblastoma-amplified sequence	NBAS	268.57
28.6142	28.5261	28.969	28.7727	28.4265	28.3575	28.4034	28.4916	17	28.6	31.9129	90			1.6036	-0.300765	-0.500258	Q9NR30	Q9NR30	Nucleolar RNA helicase 2	DDX21	87.343
28.9087	29.0916	29.1254	29.2572	29.1905	29.4034	29.253	29.1185	18	46.7	32.5058	98			0.763525	0.14561	0.245131	P50395;Q5SX87;V9GYF8;Q5SX90;V9GYJ7;Q5SX91	P50395	Rab GDP dissociation inhibitor beta	GDI2	50.663
28.4637	28.8225	29.2293	29.1689	29.3513	29.2222	29.2956	28.6344	18	34.9	32.4361	100			0.365655	0.204747	0.275753	F5GWF6;P78371;F8VQ14	F5GWF6;P78371;F8VQ14	T-complex protein 1 subunit beta	CCT2	56.806
27.5644	28.0266	27.969	27.6966	27.4053	27.4214	27.385	27.4495	16	16.2	30.9496	58			1.94282	-0.39886	-0.65292	Q7L576;A0A0G2JR96;A0A0G2JQT1;H7C229;E7EVJ5;Q96F07;E7EW33;H0YL50;A0A0G2JQH3;A0A087WVZ5;A0A0G2JRX2;A0A087WU52;A0A0G2JRV9;A0A087WWL1;A0A087WVE1;A0A087WTQ3;A0A087WWZ1;A0A087WV63;A0A0G2JRF5;A0A087WWY5	Q7L576;A0A0G2JR96;A0A0G2JQT1;H7C229;E7EVJ5;Q96F07	Cytoplasmic FMR1-interacting protein 1;Cytoplasmic FMR1-interacting protein 2	CYFIP1;CYFIP2	145.18
29.107	28.7805	28.349	28.2213	28.0765	27.7033	28.3421	29.0243	15	31.1	31.8197	73			0.422116	-0.327923	-0.388151	P31948;F5H783;H0YGI8;F5GXD8	P31948;F5H783	Stress-induced-phosphoprotein 1	STIP1	62.639
27.6633	27.6722	27.7446	27.9558	27.7964	27.9967	27.9446	27.7516	14	26.2	31.2871	83			0.5961	0.113365	0.192223	Q09161;F2Z2T1;X6R941	Q09161	Nuclear cap-binding protein subunit 1	NCBP1	91.838
27.4648	27.187	27.2043	26.9704	26.864	27.2786	26.9291	27.3311	14	26.1	30.4675	77			0.281417	-0.105945	-0.161432	Q08J23;A0A140T9Y7	Q08J23	tRNA (cytosine(34)-C(5))-methyltransferase	NSUN2	86.47
26.6676	26.3523	26.9124	26.9852	25.9633	26.2585	26.1839	26.3642	19	12.6	29.8069	61			1.7475	-0.53692	-0.805978	Q14669;H7C2Y1;G5E9G6;F8W9P3;C9JLJ5;C9JSX9;C9JLD7;H7C1L9	Q14669	E3 ubiquitin-protein ligase TRIP12	TRIP12	220.43
28.6728	28.6585	28.4498	28.8075	28.3023	28.2628	28.2336	28.5449	13	37	31.8259	94			1.64037	-0.31127	-0.516638	D6RFM5;P31040;A0A087X1I3;H0Y8X1	D6RFM5;P31040;A0A087X1I3	Succinate dehydrogenase [ubiquinone] flavoprotein subunit, mitochondrial	SDHA	63.566
27.8289	27.5034	27.4643	27.3	27.3853	27.047	27.0884	27.4821	15	28.8	30.7057	76			0.895412	-0.273453	-0.417775	A0A087WTP3;Q92945;M0QYH3;M0R0I5;M0QXW7;M0QYG1;M0R0C6;M0R3J3;M0R251;M0R263	A0A087WTP3;Q92945	Far upstream element-binding protein 2	KHSRP	73.027
29.5486	29.5935	29.6673	29.4047	29.3995	29.3415	29.4449	29.3454	15	31	32.811	92			1.51828	-0.170682	-0.304514	P50991	P50991	T-complex protein 1 subunit delta	CCT4	57.924
26.6185	27.0711	26.416	26.9942	27.3164	27.7577	27.5304	27.9422	14	24.1	30.7078	60			2.23354	0.861702	1.21993	E9PHY5;O43491;E9PK52;E9PII3;E9PQD2;E9PQN0;E9PRG1;E9PIG0;H0Y5B0;E9PJP4;Q6R5J7;J3QS55;Q6ZSX4;E9PN54;Q4VXN0;E9PMV8;A0A0C4DH22;Q9H4G0	E9PHY5;O43491;E9PK52;E9PII3	Band 4.1-like protein 2	EPB41L2	104.36
27.9207	27.9604	27.7725	28.1691	27.7773	27.8164	27.6973	27.9162	18	14.8	31.2409	88			0.819894	-0.15387	-0.259203	Q8NI27;A0A0C4DG98;H0Y815;F2Z2V2;B7ZBA0;H0Y594;H0Y7U4	Q8NI27;A0A0C4DG98	THO complex subunit 2	THOC2	182.77
26.2102	26.1228	26.1696	26.001	25.8203	25.8468	25.7748	26.3195	18	11.5	29.3616	75			0.660156	-0.185525	-0.292133	O14497;H0Y488;A0A1B0GTU5;A0A087WUV6;H0YCU6;H0YEW5	O14497;H0Y488;A0A1B0GTU5	AT-rich interactive domain-containing protein 1A	ARID1A	242.04
28.9597	29.1012	28.9738	28.8988	29.1704	29.229	29.0614	28.9295	18	47.3	32.4011	97			0.708466	0.1142	0.197428	Q99832;F8WAM2;F8WBP8;A0A0D9SG95	Q99832	T-complex protein 1 subunit eta	CCT7	59.366
28.2696	28.159	28.0397	27.9536	28.0819	27.9814	27.8597	28.0647	17	20.8	31.3962	86			0.598311	-0.108553	-0.185343	Q15393;J3QRB2;J3QL37;I3L4G7;J3QKV4	Q15393	Splicing factor 3B subunit 3	SF3B3	135.58
27.2671	26.8649	27.2953	27.0106	26.9497	26.9202	26.6404	27.0099	14	14.2	30.3339	89			0.875031	-0.229432	-0.36291	Q9UIG0	Q9UIG0	Tyrosine-protein kinase BAZ1B	BAZ1B	170.9
28.2452	28.3321	27.9703	28.0347	28.0313	27.8869	28.0018	28.5373	14	33.9	31.4572	88			0.0663157	-0.0312548	-0.0468016	P14868;H7BZ35;C9J7S3;C9JLC1;C9JQM9;H7C278	P14868	Aspartate--tRNA ligase, cytoplasmic	DARS	57.136
27.7213	27.7987	27.7943	27.6722	27.7229	27.7468	27.2999	27.8697	17	15.5	31.1731	95			0.281766	-0.0867977	-0.138234	O60264;A0A0A0MRP6;B7ZLQ5;P28370	O60264	SWI/SNF-related matrix-associated actin-dependent regulator of chromatin subfamily A member 5	SMARCA5	121.9
27.7736	27.9837	28.3553	28.0696	27.7608	28.4668	28.1277	27.9567	14	18.5	31.4463	74			0.0597047	0.0324283	0.0468485	P53618;E9PP73;E9PP63;E9PKQ1	P53618;E9PP73	Coatomer subunit beta	COPB1	107.14
27.4725	27.4856	27.7425	27.5812	27.3947	27.254	27.3211	27.3267	17	20.2	30.7328	74			1.9406	-0.2463	-0.433204	O95163	O95163	Elongator complex protein 1	IKBKAP	150.25
29.2742	29.0088	29.3638	28.942	29.6531	29.1084	29.8387	29.2297	16	32.9	32.6884	104			0.763339	0.310258	0.443005	A0A0G2JIW1;P0DMV9;P0DMV8;V9GZ37;P48741	A0A0G2JIW1;P0DMV9;P0DMV8;V9GZ37	Heat shock 70 kDa protein 1B;Heat shock 70 kDa protein 1A	HSPA1B;HSPA1A	70.108
28.7293	28.779	28.77	28.7196	29.3102	29.1922	29.1251	28.9987	17	38.8	32.3698	109			3.05483	0.407075	0.718335	P08670;B0YJC4;B0YJC5;Q5JVS8;A0A1B0GUA0;A0A1B0GTT5;A0A1B0GVG8;H7C5W5;F8W835;E7EMV2;E7ESP9;P41219;Q16352;P07196;P07197;P12036	P08670;B0YJC4	Vimentin	VIM	53.651
26.3892	26.8662	27.1441	27.1498	26.8869	27.0678	26.8621	26.7784	23	15.8	30.3153	67			0.0206891	0.0114851	0.0166731	J3KN16;Q5VYK3;R4GMY1;R4GMY3;F6XAQ5	J3KN16;Q5VYK3	Proteasome-associated protein ECM29 homolog	KIAA0368;ECM29	223.69
25.7047	25.8796	25.1865	25.1119	25.9304	25.463	25.7327	25.1372	24	7.3	28.9725	68			0.140943	0.0951724	0.125886	Q15149;E9PMV1;E9PKG0;H0YDN1	Q15149	Plectin	PLEC	531.78
27.9098	27.849	28.1741	27.8436	28.031	27.7229	27.6321	27.5278	18	19.5	31.1976	88			0.802294	-0.215705	-0.340419	P14735;Q5T5N3	P14735	Insulin-degrading enzyme	IDE	117.97
27.3956	26.9592	27.2686	27.2558	27.1452	27.1173	27.0643	26.8747	25	8.6	30.4514	101			0.752828	-0.169442	-0.277464	Q9NR09	Q9NR09	Baculoviral IAP repeat-containing protein 6	BIRC6	530.25
26.2621	26.1062	25.8303	25.8964	25.8791	25.8595	25.3644	25.705	16	10.4	29.2205	60			1.08163	-0.321722	-0.491359	O75923	O75923	Dysferlin	DYSF	237.29
27.098	27.4324	26.8584	27.6378	27.049	27.2676	26.9281	27.3794	18	25.2	30.5507	61			0.197457	-0.100662	-0.143559	O43592;F8WDU6;F5GYW6;F5GZM3	O43592	Exportin-T	XPOT	109.96
27.2052	26.9583	26.6288	26.4451	26.9599	27.1389	26.4001	27.5427	15	18.4	30.3586	57			0.287327	0.201045	0.254036	Q5JTH9;A0A087X0G0;A0A087X1U8	Q5JTH9	RRP12-like protein	RRP12	143.7
28.2454	28.1304	28.3317	28.29	28.2785	28.0628	28.1946	28.1872	14	28.4	31.5457	88			0.505991	-0.0685878	-0.122015	Q9NSD9	Q9NSD9	Phenylalanine--tRNA ligase beta subunit	FARSB	66.115
27.5583	27.6179	27.3504	27.556	27.4885	27.4765	27.4135	28.1007	15	22.1	30.9311	73			0.233655	0.099195	0.147735	A0A0A0MTB8;Q8NI36	A0A0A0MTB8;Q8NI36	WD repeat-containing protein 36	WDR36	99.365
27.4779	27.6359	27.5838	27.3569	27.758	27.5883	27.5521	27.7319	17	32.8	30.947	86			0.910251	0.143937	0.24807	P12956;B1AHC9	P12956;B1AHC9	X-ray repair cross-complementing protein 6	XRCC6	69.842
27.6011	27.5337	27.6619	27.663	28.2283	28.0132	28.109	27.7773	18	28.6	31.2961	85			2.2225	0.41705	0.694595	P14625;Q96GW1;F8W026;H0YIV0;Q58FF3	P14625	Endoplasmin	HSP90B1	92.468
28.5374	28.5502	28.3142	28.5536	28.1983	28.2232	28.2504	28.4052	15	20.1	31.7509	78			1.58752	-0.219595	-0.382158	P22314;Q5JRR6;Q5JRR9;Q5JRS0;Q5JRS1;Q5JRS3;Q5JRS2	P22314;Q5JRR6	Ubiquitin-like modifier-activating enzyme 1	UBA1	117.85
27.7857	27.5565	27.6017	27.7498	27.4842	27.4432	27.7305	27.2277	17	19.3	30.9172	83			0.868238	-0.202048	-0.32737	C9J2Y9;P30876;C9J4M6	C9J2Y9;P30876;C9J4M6	DNA-directed RNA polymerase;DNA-directed RNA polymerase II subunit RPB2	POLR2B	133.06
28.7471	28.5674	28.9981	28.9522	29.0227	28.8409	28.9985	28.6489	14	34.1	32.2625	92			0.182877	0.0615497	0.0974614	P26641	P26641	Elongation factor 1-gamma	EEF1G	50.118
27.742	27.7782	27.5048	27.3839	27.455	27.2964	27.3961	27.4944	16	24.2	30.8221	72			0.939705	-0.191773	-0.317477	Q8WUM4;C9IZF9;F8WEQ7;F8WBR8;F8WDK9	Q8WUM4	Programmed cell death 6-interacting protein	PDCD6IP	96.022
28.139	28.0941	28.3026	28.2009	28.3065	28.5284	28.9535	28.8786	15	31.2	31.8399	93			1.64746	0.482594	0.73316	O95573;F5GWH2;F5H062	O95573	Long-chain-fatty-acid--CoA ligase 3	ACSL3	80.419
30.9029	31.6004	30.7574	31.3576	30.3303	31.2786	30.6632	31.725	16	34.8	34.4994	147			0.162483	-0.155265	-0.178851	P08243;F8WEJ5;C9JT45;C9J057;C9JM09;C9JLN6	P08243;F8WEJ5	Asparagine synthetase [glutamine-hydrolyzing]	ASNS	64.369
27.5549	27.4436	27.4424	27.425	27.2037	27.0473	27.1038	27.4296	20	30.6	30.6206	104			1.63382	-0.270402	-0.458791	Q15042;C9J1R5	Q15042	Rab3 GTPase-activating protein catalytic subunit	RAB3GAP1	110.52
28.2368	28.2825	28.4336	28.6154	28.2484	28.2029	28.4374	27.9742	20	21.2	31.677	92			0.662938	-0.176345	-0.280829	O15067;H0YGH1;J3QSG0;J3QSH6;J3KTQ5;J3KTL4;J3KT98	O15067	Phosphoribosylformylglycinamidine synthase	PFAS	144.73
27.7134	27.7769	27.8851	27.939	27.9018	27.6776	27.8172	27.6606	15	19.1	31.1562	61			0.360551	-0.064312	-0.111446	P63010;A0A087X253;A0A087WU93;A0A087WZQ6;A0A087WYD1;C9J1E7;K7EJ01;H7C034;K7EN71;K7ERB2	P63010;A0A087X253;A0A087WU93;A0A087WZQ6;A0A087WYD1	AP-2 complex subunit beta	AP2B1	104.55
28.3362	28.4825	28.2584	28.139	28.2468	27.824	28.2799	28.0943	19	32.8	31.4708	104			0.749329	-0.192778	-0.307749	P45974;F5H571;H7C5J3;Q92995	P45974	Ubiquitin carboxyl-terminal hydrolase 5	USP5	95.785
26.6192	26.9241	26.9062	27.2788	26.8551	26.7071	26.8615	26.518	21	13.7	30.2605	100			0.588498	-0.196652	-0.299158	Q8NF50;A2A369;E9PDJ4;A2A370;C9J7A3;C9J613	Q8NF50;A2A369	Dedicator of cytokinesis protein 8	DOCK8	238.53
26.3947	27.1747	26.7269	27.191	27.0789	26.933	26.2767	26.273	38	9.1	30.1399	87			0.346206	-0.23142	-0.294106	A0A0A0MTR7;A0A0A0MTC1;Q63HN8;I3L3H9	A0A0A0MTR7;A0A0A0MTC1;Q63HN8	E3 ubiquitin-protein ligase RNF213	RNF213	591.4
27.118	27.1439	27.4014	27.3335	28.0572	27.8972	28.1412	27.816	19	24.8	31.1105	78			3.42714	0.72871	1.21099	P05023;M0R116;A0A0A0MT26;P13637;B1AKY9;P50993;H0Y7C1;Q13733;Q5TC01;P20648;P54707;Q5TC02;M0QXF2;Q5TC05;E9PRA5	P05023	Sodium/potassium-transporting ATPase subunit alpha-1	ATP1A1	112.89
26.816	27.0243	26.8851	26.3615	26.6568	26.6164	26.6757	26.6827	27	14.9	30.1102	81			0.337254	-0.11383	-0.176695	E7EMW7;O95071;E7ET84;E5RFK7;H0YBB4	E7EMW7;O95071	E3 ubiquitin-protein ligase UBR5	UBR5	308.57
28.1786	27.3143	29.1662	30.2451	27.1516	26.8471	28.5931	29.406	20	41	32.0877	78			0.358796	-0.726593	-0.528722	P35908	P35908	Keratin, type II cytoskeletal 2 epidermal	KRT2	65.432
26.0476	26.3158	25.7461	26.0825	25.9502	26.1042	26.0521	25.8336	19	10.7	29.3923	66			0.188058	-0.0629635	-0.0997353	Q14573	Q14573	Inositol 1,4,5-trisphosphate receptor type 3	ITPR3	304.1
28.637	28.4646	28.6731	28.4662	28.5204	28.4152	28.5539	28.1248	18	19.1	31.7978	104			0.67434	-0.156632	-0.255912	Q86VP6;A0A0C4DGH5;H0YH27;O75155	Q86VP6;A0A0C4DGH5	Cullin-associated NEDD8-dissociated protein 1	CAND1	136.37
27.1516	27.1633	26.9644	26.5342	26.8291	27.0469	26.9361	27.0288	20	16.1	30.2731	97			0.0148013	0.00679731	0.010374	F5GWX5;A0A0C4DGG9;Q14839;Q8TDI0;K7EMY3;Q12873;F5H6N4;F2Z2R5;I3L229;H7C3H7;H7C0J3	F5GWX5;A0A0C4DGG9;Q14839	Chromodomain-helicase-DNA-binding protein 4	CHD4	217.1
28.7827	28.4627	28.3698	28.1333	28.5452	28.2144	28.5548	28.9365	17	23.8	31.843	100			0.257643	0.125585	0.179494	F5H6X6;Q14697;E9PKU7;E9PNH1	F5H6X6;Q14697;E9PKU7	Neutral alpha-glucosidase AB	GANAB	96.215
28.3709	28.3382	28.4799	28.3993	28.0812	28.0546	28.0924	28.0743	19	31.5	31.5576	110			4.30065	-0.32146	-0.605006	P47897;A0A1B0GVU9;B4DDN1;H7C0R3;A0A0U1RQX5;C9J165;A0A0U1RRC8;A0A0U1RQT0;A0A0U1RQM8;A0A0U1RRI9;A0A0U1RQE9;A0A0U1RQX9;A0A0U1RR66;A0A0U1RQU2;A0A0U1RQL2;A0A0U1RQQ5;A0A0U1RQJ6;A0A1B0GTT3;A0A0U1RRJ7;F2Z2V6	P47897;A0A1B0GVU9;B4DDN1;H7C0R3	Glutamine--tRNA ligase	QARS	87.798
28.107	27.8418	28.3671	27.5196	27.752	27.7236	28.027	27.9674	20	29.8	31.2503	110			0.18127	-0.0913773	-0.131142	Q7Z2W4;C9J6P4;H7C5K1	Q7Z2W4;C9J6P4	Zinc finger CCCH-type antiviral protein 1	ZC3HAV1	101.43
29.2362	29.4251	29.5546	29.4795	29.4949	29.2895	29.3923	29.2422	15	38.6	32.7436	90			0.333999	-0.0690722	-0.117425	P40227;J3KRI6	P40227	T-complex protein 1 subunit zeta	CCT6A	58.024
27.9205	27.7051	27.6548	27.3913	27.6034	27.3477	27.775	27.7674	18	19.6	30.984	93			0.111658	-0.0445304	-0.0687463	Q7L014;A0A0C4DG89;D6RJA6;H0Y9U3	Q7L014;A0A0C4DG89	Probable ATP-dependent RNA helicase DDX46	DDX46	117.36
32.9514	32.9454	33.0117	32.4331	32.5771	32.5762	32.8269	32.9099	17	64.8	36.198	194			0.295064	-0.11286	-0.171011	P60709;P63261;I3L4N8;I3L3I0;I3L1U9;G5E9R0;E7EVS6;Q6S8J3;C9JZR7;I3L3R2;J3KT65;A5A3E0;C9JUM1;P0CG38;C9JTX5;Q9BYX7;Q562R1;F8WCH0;P0CG39	P60709;P63261;I3L4N8	Actin, cytoplasmic 1;Actin, cytoplasmic 1, N-terminally processed;Actin, cytoplasmic 2;Actin, cytoplasmic 2, N-terminally processed	ACTB;ACTG1	41.736
27.6596	28.1946	28.0074	28.0364	27.6446	28.0666	27.413	27.9107	18	29.8	31.2111	85			0.547319	-0.215747	-0.315778	P49589;B4DKY1	P49589;B4DKY1	Cysteine--tRNA ligase, cytoplasmic	CARS	85.472
30.3645	29.8598	30.2224	29.7785	30.0936	30.076	30.431	30.4251	17	38	33.555	144			0.538093	0.20011	0.297635	P07900;G3V2J8;Q58FG0;Q14568	P07900	Heat shock protein HSP 90-alpha	HSP90AA1	84.659
28.146	28.0103	27.9422	28.0464	27.7823	27.5684	28.0095	27.7336	19	23.6	31.2086	86			1.40004	-0.262753	-0.437595	E9PCR7;Q02218;A0A0D9SFS3;E9PDF2;E9PFG7;C9J4G7;Q9ULD0	E9PCR7;Q02218;A0A0D9SFS3;E9PDF2;E9PFG7	2-oxoglutarate dehydrogenase, mitochondrial	OGDH	117.66
28.8767	28.61	28.4625	28.442	28.2961	28.1563	28.2086	28.665	18	40.5	31.7895	104			0.882071	-0.266284	-0.408157	Q14166;V9GY16	Q14166	Tubulin--tyrosine ligase-like protein 12	TTLL12	74.403
29.3941	29.5841	29.3658	29.2987	29.0689	29.0102	29.103	29.0021	20	28.1	32.5243	109			2.83758	-0.364647	-0.644518	Q14566	Q14566	DNA replication licensing factor MCM6	MCM6	92.888
32.5616	32.762	33.0675	33.2637	32.66	33.0495	32.7595	32.4396	17	65.9	36.2876	213			0.409633	-0.186557	-0.26609	P68363;P68366;C9JDS9	P68363;P68366	Tubulin alpha-1B chain;Tubulin alpha-4A chain	TUBA1B;TUBA4A	50.151
25.1563	26.124	25.5276	25.8696	26.0752	26.399	26.2709	25.678	22	11.9	29.3609	51			0.83095	0.436388	0.572254	Q13813;A0A0D9SF54;A0A0D9SGF6;A0A1B0GTB7;A0A0D9SFF6	Q13813;A0A0D9SF54;A0A0D9SGF6	Spectrin alpha chain, non-erythrocytic 1	SPTAN1	284.54
27.1723	26.4824	26.8157	26.35	27.6849	27.8417	28.3915	28.3573	17	28.8	31.012	64			2.74043	1.36379	1.8016	P02786;G3V0E5;F8WBE5;H7C3V5	P02786;G3V0E5	Transferrin receptor protein 1;Transferrin receptor protein 1, serum form	TFRC	84.87
28.7422	28.2151	28.5023	28.1152	28.261	28.3598	28.3768	28.4534	22	27.2	31.722	95			0.075201	-0.0309234	-0.0477492	P42285;H0Y8U3;H0YAC4	P42285	Superkiller viralicidic activity 2-like 2	SKIV2L2	117.8
30.354	30.359	30.4355	30.6767	30.3754	30.5028	30.3321	30.2821	18	42.7	33.8162	152			0.411804	-0.0832195	-0.141213	O43776;K7EQ35;K7EIU7;K7EPK2;K7EMQ6;K7EJ19	O43776	Asparagine--tRNA ligase, cytoplasmic	NARS	62.942
27.6956	27.8668	27.5089	27.3888	27.7983	27.7362	27.7274	28.1257	19	19.5	31.0809	101			0.819723	0.231879	0.36168	H9KV28;A0A140T8Z0;A0A0G2JH68;O60610;B4E2I7	H9KV28;A0A140T8Z0;A0A0G2JH68;O60610	Protein diaphanous homolog 1	DIAPH1	136.85
27.6116	27.6045	28.1124	27.8049	27.6246	27.7554	27.8651	27.1269	26	16.8	31.0494	107			0.417747	-0.190302	-0.271147	P42356;A4QPH2;Q8N8J0;C9JLI1;A8MTF1	P42356	Phosphatidylinositol 4-kinase alpha	PI4KA	236.83
28.1937	28.1354	28.5257	28.6038	28.2329	28.5676	28.5133	27.9467	24	31.5	31.721	102			0.0980112	-0.0494881	-0.0722519	O00410;H0Y8C6;E7ETV3;H0Y3V4;C9JMV5;E7EWK4;E7EX05;E7EQT5;E7EV12;C9JZD8;C9JZ53;C9JQT6;E7ESA1;E7ESZ1;E7ETV8;O60518;C9JXE0;C9J875	O00410;H0Y8C6	Importin-5	IPO5	123.63
28.3625	28.3701	28.6192	28.3161	28.4183	28.1058	28.4695	28.3962	22	24.5	31.6877	109			0.268184	-0.0695119	-0.114553	E9PF10;O75694;D6RA13	E9PF10;O75694	Nuclear pore complex protein Nup155	NUP155	148.09
28.4891	28.4091	28.2716	28.4164	28.2131	28.3465	28.2374	28.1527	17	33.9	31.6912	109			1.40048	-0.159123	-0.283736	Q15437;Q5QPE2;Q5QPE1	Q15437;Q5QPE2	Protein transport protein Sec23B	SEC23B	86.478
29.6785	29.4886	29.128	28.8635	29.1054	28.5658	29.025	29.1595	24	22.2	32.4529	131			0.6957	-0.325729	-0.447974	Q16531;F5GY55;F5GWI0;F5H2L3;F5GZY8;F5GYG8;F5H198	Q16531;F5GY55	DNA damage-binding protein 1	DDB1	126.97
28.3225	28.5473	28.4768	28.5394	28.3567	28.0796	28.5029	28.4298	20	36.8	31.7529	106			0.57018	-0.129278	-0.213272	P54136;E5RJM9;E5RH09	P54136	Arginine--tRNA ligase, cytoplasmic	RARS	75.378
28.9794	28.4373	28.6837	28.0927	28.4487	28.2007	28.2545	28.5072	19	29	31.7867	112			0.431132	-0.195525	-0.278505	Q99460;C9J9M4;F8WCE3	Q99460	26S proteasome non-ATPase regulatory subunit 1	PSMD1	105.84
31.3043	31.1803	31.7086	31.3335	31.4825	31.4897	31.5041	31.6552	17	56.4	34.8708	176			0.588026	0.15122	0.243479	P68371;G3V2A3	P68371	Tubulin beta-4B chain	TUBB4B	49.83
30.325	30.308	30.5947	30.884	30.7257	30.6826	30.6757	30.0802	18	56.4	33.9074	126			0.0218078	0.0131421	0.0186348	P00558;P07205	P00558	Phosphoglycerate kinase 1	PGK1	44.614
28.326	28.2084	28.2873	27.9402	28.066	27.9683	27.7318	28.3328	17	25.7	31.5422	89			0.499548	-0.165762	-0.254339	P49736;H0Y8E6	P49736;H0Y8E6	DNA replication licensing factor MCM2	MCM2	101.89
27.2427	27.4404	27.4667	27.4685	27.2281	27.384	27.296	27.3859	22	21.8	30.6756	112			0.572578	-0.0810843	-0.143168	Q29RF7;H0Y9L6;H0Y9L9	Q29RF7	Sister chromatid cohesion protein PDS5 homolog A	PDS5A	150.83
28.6108	28.6457	28.7964	28.6186	28.6163	28.9132	28.8322	28.7628	21	48.8	32.0755	92			0.722584	0.113247	0.196429	P31939;C9JLK0;H7C1S2;F8WEF0	P31939	Bifunctional purine biosynthesis protein PURH;Phosphoribosylaminoimidazolecarboxamide formyltransferase;IMP cyclohydrolase	ATIC	64.615
28.9605	28.3602	28.1186	28.3991	28.3619	28.3577	28.1846	29.0656	20	35.3	31.8461	116			0.0432469	0.0328426	0.0429627	Q12906;K7EKJ9;K7EJ09;K7ER69;K7EM82;K7EQR9;K7ERM6;K7ENK6;K7EKY0;K7EQ75;K7EPG3;K7ELV3	Q12906	Interleukin enhancer-binding factor 3	ILF3	95.337
28.0314	28.2205	28.1704	28.2185	28.5288	28.4772	28.385	28.2346	24	27.2	31.6659	130			1.69834	0.246194	0.425671	O75533;H7C341	O75533	Splicing factor 3B subunit 1	SF3B1	145.83
27.7083	27.6539	27.5764	27.8473	27.4045	27.7016	27.7558	27.3399	29	18.2	30.9807	116			0.576071	-0.14606	-0.235986	F5H1D6;Q07864;F5H7E4	F5H1D6;Q07864	DNA polymerase;DNA polymerase epsilon catalytic subunit A	POLE	258.35
27.4856	27.4145	27.0114	27.1494	27.1938	26.9452	27.2475	26.9961	25	21.4	30.5126	83			0.599893	-0.169523	-0.267586	Q9NYU2;H7BZG0;Q9NYU1	Q9NYU2	UDP-glucose:glycoprotein glucosyltransferase 1	UGGT1	177.19
30.0695	29.7858	29.9702	29.648	29.7527	29.7038	29.689	30.0053	19	41.9	33.1846	98			0.279895	-0.0806799	-0.130221	P17987;E7ERF2;E7EQR6;F5H282;F5H136;F5GZ03;F5H676;F5H726;F5GZI8;F5GYL4;F5H7Y1	P17987;E7ERF2;E7EQR6;F5H282	T-complex protein 1 subunit alpha	TCP1	60.343
30.3947	30.7748	30.3631	31.0243	30.3263	30.4655	30.6307	30.5769	21	45	33.9938	138			0.346775	-0.139345	-0.207207	Q96RQ3;E9PHF7;F5GYT8;E9PG35;G5E9X5	Q96RQ3;E9PHF7;F5GYT8;E9PG35;G5E9X5	Methylcrotonoyl-CoA carboxylase subunit alpha, mitochondrial	MCCC1	80.472
26.7479	27.0002	26.6665	26.9309	26.8069	26.9763	26.9731	26.6866	24	14.1	30.1898	76			0.0840031	0.0243177	0.0402114	P12270;Q5SWX9	P12270	Nucleoprotein TPR	TPR	267.29
27.2852	26.8249	26.8723	26.3463	26.4665	26.6048	26.8618	27.1066	18	14.7	30.2562	120			0.112165	-0.0722351	-0.0977882	P35658;A0A0A0MSW3;H0Y837;H0YF36;B7ZAV2;H0YDS4;E9PKD2	P35658;A0A0A0MSW3	Nuclear pore complex protein Nup214	NUP214	213.62
28.685	28.632	28.4281	28.5514	28.3748	28.2374	28.4162	28.3775	21	30.4	31.7739	118			1.76481	-0.222695	-0.391896	A2A274;Q99798	A2A274;Q99798	Aconitate hydratase, mitochondrial	ACO2	87.819
26.4545	26.4466	26.501	26.8185	26.4504	26.606	26.3455	26.5582	19	9	29.8706	80			0.250826	-0.0651469	-0.107509	O75691	O75691	Small subunit processome component 20 homolog	UTP20	318.38
28.825	28.9743	28.9751	28.9138	28.531	28.7144	28.5975	28.657	22	39.3	32.1423	95			2.86336	-0.297055	-0.537207	Q92499;F1T0B3;A0A087X2G1	Q92499;F1T0B3;A0A087X2G1	ATP-dependent RNA helicase DDX1	DDX1	82.431
27.9793	27.6367	28.1245	28.3234	27.9504	28.189	27.8334	27.9372	23	13.5	31.3185	93			0.0854412	-0.0384727	-0.0580162	Q5T3Q7;Q9H583;Q6P664	Q5T3Q7;Q9H583	HEAT repeat-containing protein 1;HEAT repeat-containing protein 1, N-terminally processed	HEATR1	233.27
28.6355	28.5874	29.2607	28.8782	29.0767	28.858	28.9542	28.5149	23	36.5	32.2447	127			0.0182379	0.0105095	0.0151106	Q92598;A0A0A0MSM0;R4GN69;Q5TBM3	Q92598;A0A0A0MSM0	Heat shock protein 105 kDa	HSPH1	96.864
28.9158	29.0882	29.0797	29.0219	28.9491	28.8707	28.8854	29.1139	22	28.3	32.3397	113			0.474433	-0.0716319	-0.126021	F5H2F4;P11586;V9GYY3;V9GY75	F5H2F4;P11586	C-1-tetrahydrofolate synthase, cytoplasmic;Methylenetetrahydrofolate dehydrogenase;Methenyltetrahydrofolate cyclohydrolase;Formyltetrahydrofolate synthetase;C-1-tetrahydrofolate synthase, cytoplasmic, N-terminally processed	MTHFD1	110.61
29.2201	29.1145	29.2315	29.0751	28.9473	29.3161	29.0462	28.8182	21	27	32.4726	116			0.526599	-0.128305	-0.209487	P53396;K7ESG8	P53396	ATP-citrate synthase	ACLY	120.84
28.2321	27.7347	26.7841	27.626	27.1891	26.9431	27.2885	28.0264	27	15.4	30.8163	117			0.249025	-0.232412	-0.263994	Q9UQ35;I3L182;I3L4D8;I3L1I8;A0A087X1W1;I3L1C0;I3L3Q8	Q9UQ35	Serine/arginine repetitive matrix protein 2	SRRM2	299.61
28.258	28.2776	28.4256	28.1018	28.6216	27.9943	28.0367	27.8137	29	39.6	31.5086	107			0.341027	-0.149169	-0.217054	Q9Y4E8;H0YI31;F8W0H4;F8VZG8;F8VVY7;H0YHM4;H0YI26;H0YH96	Q9Y4E8	Ubiquitin carboxyl-terminal hydrolase 15	USP15	112.42
30.0624	30.2475	30.2826	30.7377	30.0684	30.2774	30.2019	30.2274	19	32.5	33.5932	147			0.407583	-0.138771	-0.213423	P26639;D6R9F8;D6RCA5;D6RDJ6;B7ZLP8;A2RTX5	P26639	Threonine--tRNA ligase, cytoplasmic	TARS	83.434
29.671	29.5361	29.9088	29.941	29.8578	29.9968	30.1019	29.8369	21	47.3	33.2457	133			0.792533	0.184142	0.299292	P50990;H7C4C8;H7C2U0	P50990	T-complex protein 1 subunit theta	CCT8	59.62
31.3702	30.7439	30.65	30.4839	30.4927	30.4374	30.1595	31.2603	21	32.4	34.0664	133			0.310121	-0.224517	-0.278848	Q00839;Q5RI18	Q00839	Heterogeneous nuclear ribonucleoprotein U	HNRNPU	90.583
29.3062	29.3502	29.6545	29.423	29.4838	29.3879	29.8304	29.504	20	51.4	32.8595	130			0.424246	0.118075	0.18933	P49368;B4DUR8;E9PRC8;Q5SZX6;E9PQ35;E9PM09;Q5SZX9;Q5SZW8	P49368;B4DUR8	T-complex protein 1 subunit gamma	CCT3	60.533
29.8158	29.7659	29.9527	29.9606	30.5063	30.0919	30.0724	29.7405	22	54.1	33.3914	120			0.672253	0.22903	0.344784	P10809;E7EXB4;E7ESH4;C9JL25;C9JL19;C9JCQ4;C9J0S9	P10809	60 kDa heat shock protein, mitochondrial	HSPD1	61.054
29.3122	29.0479	29.1981	29.3607	29.217	29.2433	29.0718	29.3338	23	52.2	32.5836	129			0.0527109	-0.0132346	-0.0224983	P13796;Q5TBN3;A0A0A0MSQ0;P13797;Q5TBN5;U3KQI3	P13796	Plastin-2	LCP1	70.288
28.0206	28.1909	28.3642	28.2088	28.2372	28.1035	28.1495	27.4097	27	20.9	31.4174	126			0.497811	-0.221129	-0.31455	Q14997;F8WBH5	Q14997	Proteasome activator complex subunit 4	PSME4	211.33
29.1175	29.7837	29.8615	30.0931	29.4058	29.5333	29.3981	29.0802	23	48	32.9017	134			0.770063	-0.359636	-0.492281	Q9H4A4;A6NKB8;A0A087WU27;A0A087WUS4;C9JMZ3;H7C2T3	Q9H4A4;A6NKB8	Aminopeptidase B	RNPEP	72.595
30.5064	30.5655	30.3762	30.2135	30.158	30.0272	29.9712	30.1047	21	35	33.5945	144			2.13019	-0.350112	-0.595122	O43143	O43143	Pre-mRNA-splicing factor ATP-dependent RNA helicase DHX15	DHX15	90.932
30.2069	30.2429	30.0933	30.747	30.1888	30.3328	30.4851	30.0948	22	35	33.6678	133			0.103037	-0.0471382	-0.0705367	Q14974;J3KTM9;J3QR48;J3QRG4	Q14974;J3KTM9	Importin subunit beta-1	KPNB1	97.169
29.6633	29.4466	29.5772	29.2683	29.0285	29.0442	29.2355	29.3762	26	39.9	32.6391	137			1.42553	-0.317772	-0.51297	E9PLK3;P55786;A6NEC2;E9PP11;H0YDG0;H0YCQ5;E9PJY4;E9PPD4;E9PJF9;E9PRQ5;E9PPZ2	E9PLK3;P55786	Puromycin-sensitive aminopeptidase	NPEPPS	102.99
28.189	28.249	27.8341	27.8388	27.6619	27.7786	27.7589	28.0175	21	26.9	31.3225	108			0.831831	-0.223475	-0.352291	Q6P2E9;I3L2F4	Q6P2E9	Enhancer of mRNA-decapping protein 4	EDC4	151.66
28.2821	28.2749	28.2264	28.3522	28.0567	28.0472	27.9931	28.0474	23	29.5	31.4714	106			3.79451	-0.247808	-0.46784	A0AVT1;H0Y8S8	A0AVT1	Ubiquitin-like modifier-activating enzyme 6	UBA6	117.97
27.6248	27.72	27.6653	27.452	27.3502	27.0903	27.3151	27.3617	23	19	30.7721	140			2.09941	-0.336198	-0.573587	P24928;A0A087WWE2	P24928;A0A087WWE2	DNA-directed RNA polymerase II subunit RPB1;DNA-directed RNA polymerase	POLR2A	217.17
28.8817	28.7678	28.4016	28.6793	28.5263	28.3331	28.2647	28.8269	23	29.8	31.878	153			0.560373	-0.194825	-0.294171	Q9NSE4	Q9NSE4	Isoleucine--tRNA ligase, mitochondrial	IARS2	113.79
30.1775	30.0753	30.062	29.7394	30.4427	30.0079	30.6694	30.5114	21	41.2	33.6158	140			1.22199	0.394292	0.588117	P11142;E9PKE3;E9PNE6;E9PLF4;E9PQQ4;E9PQK7;E9PK54;A8K7Q2;E9PPY6;E9PI65;P54652;E9PN25;E9PM13;E9PS65	P11142;E9PKE3;E9PNE6	Heat shock cognate 71 kDa protein	HSPA8	70.897
31.3348	31.344	31.9656	31.2571	31.3813	31.0567	31.5992	31.265	24	52.9	34.7658	183			0.317281	-0.149832	-0.214112	P14618;B4DNK4;H3BTN5;H3BQ34;H3BR70;H3BUW1;H3BTJ2;H3BT25;H3BU13;H3BN34;H3BQZ3	P14618;B4DNK4;H3BTN5;H3BQ34;H3BR70	Pyruvate kinase PKM;Pyruvate kinase	PKM	57.936
28.9355	29.1907	28.8436	29.0818	28.8241	28.8261	28.7708	28.5124	33	21.1	32.2098	139			1.39442	-0.279555	-0.460351	Q92621;U3KPX2;U3KQ47;U3KQ97	Q92621	Nuclear pore complex protein Nup205	NUP205	227.92
29.3742	29.4024	29.3668	29.5746	29.591	29.3359	29.4667	29.2611	24	39.2	32.7595	144			0.0640185	-0.0158052	-0.0268925	P55072;C9IZA5;C9JUP7	P55072	Transitional endoplasmic reticulum ATPase	VCP	89.321
27.8072	28.2134	27.8735	27.9578	27.8809	27.9094	27.8997	27.7393	25	12.8	31.2339	103			0.494955	-0.105662	-0.176853	P42345;B1AKP8	P42345	Serine/threonine-protein kinase mTOR	MTOR	288.89
28.1459	27.7792	28.1765	27.8514	27.9081	27.5977	27.8394	27.3353	26	21.9	31.1893	130			0.993195	-0.318125	-0.47862	O95602;B9ZVN9	O95602;B9ZVN9	DNA-directed RNA polymerase I subunit RPA1;DNA-directed RNA polymerase	POLR1A	194.81
27.2241	27.0809	27.1504	27.5045	27.368	27.2883	26.8619	27.4489	27	18	30.5997	101			0.00387182	0.00186014	0.0028166	Q14690	Q14690	Protein RRP5 homolog	PDCD11	208.7
28.911	29.1342	28.9833	28.2165	28.4737	28.4468	28.4603	28.6194	26	21.4	31.9932	110			0.734204	-0.311213	-0.439846	P26358;K7EJL0;K7ENW7;K7EMU8;K7EIZ6	P26358	DNA (cytosine-5)-methyltransferase 1	DNMT1	183.16
29.7282	29.7786	30.1131	29.8929	29.6828	29.6419	29.69	29.538	20	33.1	33.137	142			1.38892	-0.240035	-0.405165	H3BLZ8;Q92841;A0A0U1RQJ0	H3BLZ8;Q92841	Probable ATP-dependent RNA helicase DDX17	DDX17	80.439
28.8536	29.0983	28.8965	29.1414	28.8731	28.8567	28.8186	28.8182	25	24.9	32.2699	117			1.11388	-0.1558	-0.271875	P29144;Q5VZU9	P29144;Q5VZU9	Tripeptidyl-peptidase 2	TPP2	138.35
29.0951	29.1973	29.2455	29.2789	29.057	29.1739	29.0222	28.7969	25	28.4	32.4198	151			1.13505	-0.191713	-0.325803	P53621	P53621	Coatomer subunit alpha;Xenin;Proxenin	COPA	138.34
29.1516	29.4234	29.3489	29.6528	29.451	29.5761	29.5868	29.2342	28	42.2	32.8279	150			0.203628	0.0678506	0.107352	O43707;F5GXS2;H7C144;K7EJH8;K7EP19;G3V2E8;G3V2X9;F6THM6;D6RH00	O43707;F5GXS2	Alpha-actinin-4	ACTN4	104.85
30.1618	30.1943	29.9376	29.883	29.9312	29.7257	29.5846	30.3633	28	35.2	33.3057	151			0.324939	-0.142991	-0.208172	P09874;Q5VX84;Q5VX85	P09874	Poly [ADP-ribose] polymerase 1	PARP1	113.08
27.2123	27.3465	26.452	26.991	27.2641	27.3709	26.9377	27.5478	24	21.9	30.5084	92			0.554402	0.279689	0.380512	Q13576;F5H7S7;E7EWC2;D6R939;E9PDT6;D6RDK8	Q13576;F5H7S7;E7EWC2	Ras GTPase-activating-like protein IQGAP2	IQGAP2	180.58
27.2024	27.2423	26.7069	26.5622	27.0966	26.6939	26.7483	26.9748	32	20.2	30.2379	107			0.0927179	-0.0500369	-0.0718128	P02549;V9GY79	P02549	Spectrin alpha chain, erythrocytic 1	SPTA1	280.01
29.252	29.6208	29.4772	29.5904	29.2477	29.187	29.1497	29.0715	26	31.6	32.6934	145			1.89975	-0.32113	-0.543034	Q9HAV4;H0Y3W3;E2QRM3;H0Y9I3;H0Y3Q8	Q9HAV4	Exportin-5	XPO5	136.31
28.6088	28.9512	28.982	29.3968	28.8422	28.8168	28.6043	28.5754	29	35	32.2431	135			0.773298	-0.27502	-0.407019	Q93009;H3BND8;F5H2X1;I3L2D8;H3BUV0;H3BTM1;H3BRA2;H3BQD1	Q93009;H3BND8	Ubiquitin carboxyl-terminal hydrolase 7;Ubiquitin carboxyl-terminal hydrolase	USP7	128.3
27.9167	28.1971	28.0942	28.3278	28.0153	28.0812	27.938	27.5514	32	16.6	31.3489	125			0.803121	-0.237485	-0.367047	Q93008;O00507;H7C2M9	Q93008	Probable ubiquitin carboxyl-terminal hydrolase FAF-X	USP9X	292.28
30.0085	30.2452	30.3183	30.2225	30.0825	30.0506	30.1721	30.0561	25	43.3	33.4893	166			0.733589	-0.108315	-0.189267	P34932;A0A087WYC1	P34932;A0A087WYC1	Heat shock 70 kDa protein 4	HSPA4	94.33
28.7266	28.5624	28.6238	28.5551	28.5588	28.4494	28.4441	28.4268	27	24.4	31.9038	129			1.5961	-0.1472	-0.267753	Q8TEQ6	Q8TEQ6	Gem-associated protein 5	GEMIN5	168.59
27.7703	27.8506	27.5995	27.8649	27.528	27.6954	27.4904	27.5257	34	17.7	30.9903	133			1.48843	-0.211408	-0.366801	Q9UPU5;A0A0U1RQI9	Q9UPU5	Ubiquitin carboxyl-terminal hydrolase 24	USP24	294.36
29.7793	29.5085	29.614	29.0819	28.7182	29.1824	28.9937	29.5314	24	33.3	32.6264	118			0.865393	-0.389472	-0.536083	P22102;F8WD69;A0A140TA71	P22102	Trifunctional purine biosynthetic protein adenosine-3;Phosphoribosylamine--glycine ligase;Phosphoribosylformylglycinamidine cyclo-ligase;Phosphoribosylglycinamide formyltransferase	GART	107.77
30.563	30.5991	30.2284	30.3994	30.0005	30.1262	30.1853	31.0217	26	37.1	33.7373	173			0.179515	-0.11404	-0.152523	P56192;H0YIP0;H0YI94;H0YHV5;H0YIC2;F8VS26;F8W0M7;F8W0S4;F8VZZ9;F5H2V6;F8VPL7;H0YHL6;H0YI27	P56192	Methionine--tRNA ligase, cytoplasmic	MARS	101.11
30.4765	30.7962	30.4749	30.9244	30.4344	30.3024	30.2855	30.6717	24	43.1	33.9037	186			0.847045	-0.244535	-0.379243	P05165;A0A1B0GU58;A0A1B0GUX9;A0A1B0GWI4;A0A1B0GWA1;A0A1B0GTR1;H0Y5U0;Q5JTW6;Q5JVH2;H0Y4B9	P05165;A0A1B0GU58;A0A1B0GUX9;A0A1B0GWI4;A0A1B0GWA1	Propionyl-CoA carboxylase alpha chain, mitochondrial	PCCA	80.058
29.4753	29.611	29.5028	29.8871	29.5861	29.4977	29.1632	29.1691	27	33.8	32.828	138			0.932825	-0.26504	-0.411104	Q9H0A0;A0A087WV29;E9PMU0;E9PJN6	Q9H0A0;A0A087WV29	N-acetyltransferase 10	NAT10	115.73
27.5709	26.7821	26.8902	26.9006	27.1469	27.1191	26.9095	27.8002	23	13.2	30.5478	108			0.336464	0.207985	0.272222	Q8WYP5	Q8WYP5	Protein ELYS	AHCTF1	252.5
29.5095	29.9058	29.5931	30.1148	29.4585	29.8406	29.33	29.9878	25	37.4	33.0758	180			0.246112	-0.126592	-0.178481	P49588;H3BPK7	P49588	Alanine--tRNA ligase, cytoplasmic	AARS	106.81
27.993	28.1246	27.8157	27.9429	28.0164	28.0828	27.6522	28.1765	32	20.2	31.312	139			0.0338798	0.012898	0.0204304	A6NHR9;J3KTL8;J3KRK8;J3QSH1	A6NHR9;J3KTL8	Structural maintenance of chromosomes flexible hinge domain-containing protein 1	SMCHD1	226.37
30.0255	30.2959	29.8066	30.1476	29.928	29.9053	29.9602	30.0359	24	44.5	33.3743	159			0.470307	-0.111553	-0.183684	Q06210;O94808;E5RJP4	Q06210	Glutamine--fructose-6-phosphate aminotransferase [isomerizing] 1	GFPT1	78.806
28.4205	28.5168	28.5765	28.5647	28.5111	28.45	28.4169	28.1668	37	19.7	31.8283	163			0.791816	-0.133435	-0.228648	A5YKK6;H3BMZ2;H3BR89;H3BMH0;H3BNB1;H3BVC9;H3BT18;H3BU44	A5YKK6	CCR4-NOT transcription complex subunit 1	CNOT1	266.94
32.8763	32.5465	32.7258	32.2905	32.4911	32.3746	32.5771	32.7523	29	47	35.9872	280			0.157048	-0.060977	-0.0939569	P08238	P08238	Heat shock protein HSP 90-beta	HSP90AB1	83.263
28.5237	28.7115	28.5939	28.3538	28.6761	28.4519	28.7783	28.8997	34	30.2	31.9786	139			0.611078	0.155781	0.250914	P46940;A0A0J9YXZ5;H0YLE8;H0YKA5;A0A087X225;A0A087WWP1	P46940;A0A0J9YXZ5;H0YLE8	Ras GTPase-activating-like protein IQGAP1	IQGAP1	189.25
27.6915	27.9959	27.8766	27.6868	27.7251	27.7042	27.9311	28.0614	35	21.3	31.1794	150			0.142058	0.0427103	0.0695507	A0A087WUZ3;Q01082;F8W6C1;A4QPE4	A0A087WUZ3;Q01082	Spectrin beta chain, non-erythrocytic 1	SPTBN1	274.83
31.4273	31.7035	31.6083	31.6565	31.3649	31.3484	31.4106	31.4419	35	43	34.8413	241			1.75081	-0.207433	-0.367737	P11498;E9PS68;E9PRE7	P11498	Pyruvate carboxylase, mitochondrial	PC	129.63
28.3822	28.2754	28.3956	28.1122	28.5396	28.3255	28.5148	28.1377	33	20	31.6923	139			0.327621	0.0880694	0.143361	Q14008;H0YDX5;E9PQH5;H0YCF6;H0YEK7	Q14008	Cytoskeleton-associated protein 5	CKAP5	225.49
29.7757	29.8712	29.7694	29.5336	29.4283	29.5228	29.5756	29.5274	28	39.8	32.9928	180			1.54314	-0.22394	-0.387321	Q7KZF4;H7C597	Q7KZF4	Staphylococcal nuclease domain-containing protein 1	SND1	102
29.4459	29.5654	29.8466	29.6409	29.5085	29.2909	29.5146	29.2829	31	42.9	32.883	198			1.10769	-0.225487	-0.371939	Q15029;K7EP67;K7EJ74;K7EIV5;K7EIT3	Q15029	116 kDa U5 small nuclear ribonucleoprotein component	EFTUD2	109.43
30.5266	30.7355	30.9237	30.878	30.7199	30.7228	30.6425	30.3131	35	40.1	34.051	213			0.594196	-0.16634	-0.263176	P26640;A0A140T936;A0A140T954;H0Y426;A2ABF4;A0A0G2JJT9;A0A140T904	P26640;A0A140T936	Valine--tRNA ligase	VARS	140.47
30.5729	30.2343	30.2468	30.0352	30.2215	29.9171	29.8191	29.9477	31	31.2	33.467	189			1.09589	-0.295975	-0.461909	P52701;A0A087WWJ1;F8WAX8;A0A087WYT6;C9JH55;C9J8Y8;C9J7Y7;U3KQ72;F8W7G9	P52701;A0A087WWJ1	DNA mismatch repair protein Msh6	MSH6	152.78
31.8574	31.9467	31.9073	31.9165	31.6071	31.5937	31.8578	31.6301	34	40.5	35.1593	286			1.94949	-0.234789	-0.415526	Q08211	Q08211	ATP-dependent RNA helicase A	DHX9	140.96
28.2418	27.821	27.9887	27.5696	27.8394	27.906	27.6089	28.2822	35	16.2	31.2415	160			0.00643662	0.00382042	0.00546737	P46013	P46013	Antigen KI-67	MKI67	358.69
29.1292	28.6476	29.0487	28.7175	28.763	28.4083	28.9085	28.7237	45	31.1	32.1268	207			0.538366	-0.184871	-0.280471	Q14315	Q14315	Filamin-C	FLNC	291.02
29.7243	29.4944	29.2833	29.2832	29.2161	29.1542	29.3909	29.5487	40	31.5	32.7057	209			0.374835	-0.118845	-0.186309	P35580;E7ERA5;A0A0C4DFM8;A1L2Z2	P35580	Myosin-10	MYH10	229
29.3973	29.5772	29.3078	29.1737	29.0756	29.2058	29.278	29.0068	37	22.8	32.6075	236			1.11098	-0.222453	-0.367965	P11717;S4R328	P11717	Cation-independent mannose-6-phosphate receptor	IGF2R	274.37
32.9974	33.0922	33.4517	33.2964	33.2083	33.2576	33.4053	32.4412	42	55.7	36.5606	328			0.219815	-0.13134	-0.177671	P13639;M0R0I6	P13639	Elongation factor 2	EEF2	95.337
30.4141	31.124	31.2417	31.5503	31.0823	31.3242	31.1042	30.347	42	44.4	34.4171	266			0.139304	-0.1181	-0.143842	Q9P2J5;A0A087WXY1	Q9P2J5	Leucine--tRNA ligase, cytoplasmic	LARS	134.46
29.6414	29.9133	29.7025	30.282	29.4117	29.8473	29.3371	29.7269	39	35.1	33.093	199			0.795982	-0.30401	-0.440849	P35573;A0A1C7CYW1	P35573	Glycogen debranching enzyme;4-alpha-glucanotransferase;Amylo-alpha-1,6-glucosidase	AGL	174.76
31.1382	31.6444	31.3038	31.6157	31.2025	31.3483	31.3377	31.1117	42	45	34.6969	302			0.614971	-0.175499	-0.276184	P41252;A0A0A0MSX9;J3KR24;Q5TCD1;Q5TCC9;Q5TCC6	P41252;A0A0A0MSX9;J3KR24	Isoleucine--tRNA ligase, cytoplasmic	IARS	144.5
31.2803	31.1762	31.1837	30.7233	30.8425	30.8321	31.0409	30.8467	54	33	34.3498	305			0.728053	-0.200313	-0.31569	F8VPD4;P27708;H7C3Z5;H7BZB3;H7C2E4;P31327	F8VPD4;P27708	CAD protein;Glutamine-dependent carbamoyl-phosphate synthase;Aspartate carbamoyltransferase;Dihydroorotase	CAD	236.02
29.4195	29.0289	28.994	28.7994	29.0159	28.7871	28.6635	28.9433	49	32.4	32.2719	256			0.657046	-0.208023	-0.319033	O75369	O75369	Filamin-B	FLNB	278.16
29.9777	30.1206	30.0142	30.1687	30.3736	30.4119	30.1234	30.3836	44	39.4	33.639	254			1.69603	0.2528	0.435429	P42704;B8ZZ38;A0A0C4DG06;C9JCA9;H7C3W8	P42704	Leucine-rich PPR motif-containing protein, mitochondrial	LRPPRC	157.9
29.5166	29.6255	29.5434	29.2181	29.6155	29.519	29.6828	29.3614	48	28.5	32.8728	267			0.247755	0.0687852	0.112198	Q9Y490;Q9Y4G6;H0YMT1;A0A1C7CYV7;A0A1B0GVU7	Q9Y490	Talin-1	TLN1	269.76
31.7908	32.1549	31.9161	31.9274	31.5188	31.8725	31.6839	31.7182	52	43	35.1505	359			1.25721	-0.248962	-0.41156	P07814;V9GYZ6;V9GZ76	P07814;V9GYZ6	Bifunctional glutamate/proline--tRNA ligase;Glutamate--tRNA ligase;Proline--tRNA ligase	EPRS	170.59
27.9762	27.8857	27.8775	27.9144	28.1375	27.8192	28.1305	27.7543	72	13.3	31.277	251			0.176147	0.0468979	0.0777015	H3BPE1;H3BQK9;Q9UPN3;H0Y390;E9PNZ4;E9PLY5;H0Y314;E9PLY0;H0Y4F5;H0YD69;H0Y6T5;H0Y7I1;E9PS75;H0YC65	H3BPE1;H3BQK9;Q9UPN3;H0Y390	Microtubule-actin cross-linking factor 1, isoforms 1/2/3/5	MACF1	856.87
28.5006	28.2071	28.3407	28.0396	28.5128	28.5723	28.3614	28.6573	51	21.4	31.7676	207			1.14633	0.253965	0.412188	P49792;Q99666;O14715;J3KQ37;F8W705;H0YBN8;F8WBP7;C9J6W1	P49792	E3 SUMO-protein ligase RanBP2	RANBP2	358.2
30.9689	31.0538	30.7767	30.6648	30.648	30.6232	30.5798	30.7096	56	32.7	34.1034	332			1.29533	-0.225935	-0.381196	O75643;B4E0P5	O75643	U5 small nuclear ribonucleoprotein 200 kDa helicase	SNRNP200	244.5
30.8494	30.9321	30.8573	30.8791	30.8507	30.8234	30.8708	30.6338	60	32.8	34.1953	391			0.717755	-0.0847554	-0.152002	Q6P2Q9;I3L0J9;I3L3Z8;I3L1T8	Q6P2Q9	Pre-mRNA-processing-splicing factor 8	PRPF8	273.6
29.6323	29.92	29.8611	30.0383	30.408	30.3395	30.2381	29.9552	65	32.5	33.4693	252			1.52861	0.37229	0.589874	Q92616	Q92616	Translational activator GCN1	GCN1L1	292.75
29.5639	29.6691	29.6138	29.459	29.6032	29.5816	29.6106	29.2346	65	16.5	32.9083	312			0.282121	-0.068975	-0.114666	Q5T4S7;A0A0A0MSW0;X6R960;X6RE05;Q5TBN9	Q5T4S7	E3 ubiquitin-protein ligase UBR4	UBR4	573.83
32.2837	32.6142	32.5933	32.699	32.6364	32.6333	32.7811	32.219	54	44.8	35.922	430			0.0459143	0.0199165	0.0305726	A0A087WVQ6;Q00610;J3KS13;A0A087WX41;P53675;J3KSQ2;K7EJJ5;J3QL20;J3KRF5	A0A087WVQ6;Q00610	Clathrin heavy chain;Clathrin heavy chain 1	CLTC	192.06
29.762	30.0443	30.1438	30.0505	29.9394	30.0405	29.8283	29.519	82	20.3	33.2588	369			0.562017	-0.168343	-0.26308	Q9NU22;Q5T795;M0QXR3	Q9NU22	Midasin	MDN1	632.81
30.4664	30.1614	30.1705	29.7222	30.0653	29.8404	29.9446	29.9247	61	38.9	33.3735	336			0.539328	-0.186347	-0.282268	Q5HY54;Q60FE5;P21333;A0A087WWY3;F8WE98;H0Y5C6;H0Y5F3;H7C2E7	Q5HY54;Q60FE5;P21333;A0A087WWY3	Filamin-A	FLNA	276.55
31.3371	30.997	30.6984	30.6742	30.853	30.6223	30.5005	30.8678	62	37.9	34.2157	368			0.561817	-0.215812	-0.317656	P35579;Q5BKV1;B1AH99	P35579	Myosin-9	MYH9	226.53
32.49	32.4407	32.6774	32.4034	32.4323	32.2323	32.7334	32.0643	67	39.2	35.7848	423			0.383965	-0.137308	-0.20926	P49327;A0A0U1RQF0;A0A0U1RRG3;A0A1B0GTR5;J3KTF0	P49327;A0A0U1RQF0	Fatty acid synthase;[Acyl-carrier-protein] S-acetyltransferase;[Acyl-carrier-protein] S-malonyltransferase;3-oxoacyl-[acyl-carrier-protein] synthase;3-oxoacyl-[acyl-carrier-protein] reductase;3-hydroxyacyl-[acyl-carrier-protein] dehydratase;Enoyl-[acyl-carrier-protein] reductase;Oleoyl-[acyl-carrier-protein] hydrolase	FASN	273.42
30.7375	30.9052	30.7477	30.6707	30.8067	30.687	30.6634	30.4373	103	27.4	34.0482	508			0.601248	-0.116664	-0.197161	Q14204;H0YJ21	Q14204	Cytoplasmic dynein 1 heavy chain 1	DYNC1H1	532.4
33.7265	33.8621	34.167	33.8439	33.6686	33.5921	33.9181	33.7866	96	56.8	37.1819	701			0.643109	-0.158501	-0.256512	Q13085;Q59FY4;O00763;A0A0C4DGT1;A0A087X0W4;A0A087WWN5;A0A087X2F8;A0A087X126;A0A087WYK6;S4R3S7;F8W8T8;H0YGH5;A0A087WVR6;A0A087WYS8	Q13085	Acetyl-CoA carboxylase 1;Biotin carboxylase	ACACA	265.55
33.0425	33.2772	33.1434	33.2278	33.3039	33.3625	33.1245	32.9897	133	37.1	36.5526	880			0.081349	0.0224247	0.0374051	P78527;F5GX40;H0YG84	P78527	DNA-dependent protein kinase catalytic subunit	PRKDC	469.08

## Sheet: Hits annotation
LFQ intensities (Log2)								Global data				T-test probe 3 vs DMSO																						From GO
DMSO_A	DMSO_B	DMSO_C	DMSO_D	probe3_A	probe3_B	probe3_C	probe3_D	Razor + unique peptides	Sequence coverage [%]	Intensity	MS/MS count	Significant	Significant & Log2(enrichment) >2	-Log10 (p-value)	Difference	Test statistic	Protein IDs	Majority protein IDs	Protein names	Gene names	Mol. weight [kDa]	Catalytic activity	EC number	Active site	Gene ontology (biological process)	Gene ontology (molecular function)	Gene ontology (cellular component)	Gene ontology IDs	nucleophile	Carboxypeptidase	Hydrolase	SH_1	SH_2	transferase activity, transferring acyl groups	catabolic process	cofactor metabolic process	generation of precursor metabolites and energy	homeostatic process	lipid metabolic process	membrane organization	oxidoreductase activity	protein complex assembly	protein targeting	small molecule metabolic process	transmembrane transport	transmembrane transporter activity	transport	vesicle-mediated transport
21.6214	22.2199	22.967	21.4537	30.2738	30.4377	30.6415	30.7601	8	37.2	33.0506	38	+	+	6.41647	8.46277	9.85032	Q53GQ0;A0A1B0GV93;E9PI21;A0A1B0GVY6;A0A1B0GW85;A0A1B0GU83	Q53GQ0;A0A1B0GV93;E9PI21;A0A1B0GVY6	Very-long-chain 3-oxoacyl-CoA reductase	HSD17B12	34.324	CATALYTIC ACTIVITY: A very-long-chain (3R)-3-hydroxyacyl-CoA + NADP(+) = a very-long-chain 3-oxoacyl-CoA + NADPH. {ECO:0000269|PubMed:12482854}.;CATALYTIC ACTIVITY: 17-beta-estradiol + NAD(P)(+) = estrone + NAD(P)H. {ECO:0000269|PubMed:16166196}.	1.1.1.330;1.1.1.62	ACT_SITE 202 202 Proton acceptor. {ECO:0000255|PROSITE-ProRule:PRU10001}.	estrogen biosynthetic process [GO:0006703];extracellular matrix organization [GO:0030198];fatty acid biosynthetic process [GO:0006633];long-chain fatty-acyl-CoA biosynthetic process [GO:0035338];positive regulation of cell-substrate adhesion [GO:0010811];steroid biosynthetic process [GO:0006694]	3-oxo-arachidoyl-CoA reductase activity [GO:0102339];3-oxo-behenoyl-CoA reductase activity [GO:0102340];3-oxo-cerotoyl-CoA reductase activity [GO:0102342];3-oxo-lignoceroyl-CoA reductase activity [GO:0102341];estradiol 17-beta-dehydrogenase activity [GO:0004303];heparin binding [GO:0008201];long-chain-3-hydroxyacyl-CoA dehydrogenase activity [GO:0016509];oxidoreductase activity [GO:0016491]	endoplasmic reticulum membrane [GO:0005789];integral component of membrane [GO:0016021];proteinaceous extracellular matrix [GO:0005578];integral component of membrane [GO:0016021];integral component of membrane [GO:0016021];integral component of membrane [GO:0016021];integral component of membrane [GO:0016021]	GO:0004303;GO:0005578;GO:0005789;GO:0006633;GO:0006694;GO:0006703;GO:0008201;GO:0010811;GO:0016021;GO:0016509;GO:0030198;GO:0035338;GO:0102339;GO:0102340;GO:0102341;GO:0102342;GO:0016021;GO:0016021;GO:0016021;GO:0016021;GO:0016491								+			+		+			+
21.5012	21.7281	21.5497	21.8398	28.2283	28.5169	28.2665	28.581	17	30.5	30.9346	68	+	+	8.7076	6.74347	10.906	H7BXI1;A0A087WXU3;A0FGR8	H7BXI1;A0A087WXU3;A0FGR8	Extended synaptotagmin-2	ESYT2	98.008				endocytosis [GO:0006897];lipid transport [GO:0006869]	cadherin binding involved in cell-cell adhesion [GO:0098641];calcium-dependent phospholipid binding [GO:0005544];calcium ion binding [GO:0005509];identical protein binding [GO:0042802];phosphatidylcholine binding [GO:0031210];phosphatidylethanolamine binding [GO:0008429];phosphatidylinositol binding [GO:0035091];lipid binding [GO:0008289];lipid binding [GO:0008289]	cell-cell adherens junction [GO:0005913];extrinsic component of cytoplasmic side of plasma membrane [GO:0031234];integral component of plasma membrane [GO:0005887];intrinsic component of endoplasmic reticulum membrane [GO:0031227];membrane [GO:0016020];organelle membrane contact site [GO:0044232];integral component of membrane [GO:0016021];integral component of membrane [GO:0016021]	GO:0005509;GO:0005544;GO:0005887;GO:0005913;GO:0006869;GO:0006897;GO:0008429;GO:0016020;GO:0031210;GO:0031227;GO:0031234;GO:0035091;GO:0042802;GO:0044232;GO:0098641;GO:0008289;GO:0016021;GO:0008289;GO:0016021											+								+	+
22.2265	21.8757	21.3554	21.5091	28.0882	27.7336	27.4075	27.8998	11	16.2	30.3317	35	+	+	6.55822	6.04055	8.13374	P50416;H3BMD2;H3BUJ0;H3BP22;H3BUV7	P50416	Carnitine O-palmitoyltransferase 1, liver isoform	CPT1A	88.367	CATALYTIC ACTIVITY: Palmitoyl-CoA + L-carnitine = CoA + L-palmitoylcarnitine. {ECO:0000269|PubMed:11350182, ECO:0000269|PubMed:14517221}.	2.3.1.21	ACT_SITE 473 473 Proton acceptor. {ECO:0000250}.	carnitine metabolic process [GO:0009437];carnitine shuttle [GO:0006853];cellular response to fatty acid [GO:0071398];circadian rhythm [GO:0007623];eating behavior [GO:0042755];epithelial cell differentiation [GO:0030855];fatty acid beta-oxidation [GO:0006635];glucose metabolic process [GO:0006006];long-chain fatty acid metabolic process [GO:0001676];positive regulation of fatty acid beta-oxidatio…	carnitine O-palmitoyltransferase activity [GO:0004095];palmitoleoyltransferase activity [GO:1990698];transferase activity, transferring acyl groups [GO:0016746];transferase activity, transferring acyl groups [GO:0016746]	integral component of mitochondrial outer membrane [GO:0031307];membrane [GO:0016020];mitochondrial inner membrane [GO:0005743];mitochondrial outer membrane [GO:0005741];mitochondrion [GO:0005739];integral component of membrane [GO:0016021]	GO:0001676;GO:0004095;GO:0005739;GO:0005741;GO:0005743;GO:0006006;GO:0006635;GO:0006641;GO:0006853;GO:0007623;GO:0009437;GO:0014070;GO:0016020;GO:0030855;GO:0031307;GO:0032000;GO:0042493;GO:0042755;GO:0050796;GO:0051260;GO:0071398;GO:1990698;GO:0016021;GO:0016746;GO:0016746						+	+				+			+		+	+		+
21.7191	22.607	21.3279	22.2495	26.4087	25.5272	27.0706	25.4047	6	18.2	28.8122	11	+	+	3.84716	4.12689	4.1951	P37268;E9PNM1;E9PJG4;E9PS69	P37268;E9PNM1	Squalene synthase	FDFT1	48.115	CATALYTIC ACTIVITY: 2 farnesyl diphosphate + NAD(P)H = squalene + 2 diphosphate + NAD(P)(+).	2.5.1.21		cholesterol biosynthetic process [GO:0006695];ergosterol biosynthetic process [GO:0006696];farnesyl diphosphate metabolic process [GO:0045338];isoprenoid biosynthetic process [GO:0008299];steroid biosynthetic process [GO:0006694];ergosterol biosynthetic process [GO:0006696];biosynthetic process [GO:0009058];biosynthetic process [GO:0009058]	farnesyl-diphosphate farnesyltransferase activity [GO:0004310];oxidoreductase activity [GO:0016491];squalene synthase activity [GO:0051996];farnesyl-diphosphate farnesyltransferase activity [GO:0004310];squalene synthase activity [GO:0051996];transferase activity [GO:0016740];transferase activity [GO:0016740]	endoplasmic reticulum [GO:0005783];endoplasmic reticulum membrane [GO:0005789];integral component of membrane [GO:0016021];endoplasmic reticulum [GO:0005783];integral component of membrane [GO:0016021];endoplasmic reticulum [GO:0005783]	GO:0004310;GO:0005783;GO:0005789;GO:0006694;GO:0006695;GO:0006696;GO:0008299;GO:0016021;GO:0016491;GO:0045338;GO:0051996;GO:0004310;GO:0005783;GO:0006696;GO:0016021;GO:0051996;GO:0009058;GO:0016740;GO:0005783;GO:0009058;GO:0016740											+		+			+
22.233	22.7818	22.4017	22.7107	26.4201	26.8377	26.4405	26.2917	5	16.2	29.0716	16	+	+	6.31362	3.96573	5.87395	B5MDU6;Q9H6V9;A0A0A0MSH6;C9JUM0;B5MCU4;C9JHU6;B5MCE2;B4DRG3	B5MDU6;Q9H6V9;A0A0A0MSH6;C9JUM0;B5MCU4	UPF0554 protein C2orf43	LDAH;C2orf43	42.668		3.1.1.-	ACT_SITE 139 139 Nucleophile. {ECO:0000255|PROSITE-ProRule:PRU10037}.;ACT_SITE 271 271 Charge relay system. {ECO:0000305}.;ACT_SITE 300 300 Charge relay system. {ECO:0000305}.	lipid catabolic process [GO:0016042];lipid storage [GO:0019915]	lipase activity [GO:0016298]	endoplasmic reticulum [GO:0005783];lipid particle [GO:0005811]	GO:0005783;GO:0005811;GO:0016042;GO:0016298;GO:0019915	+						+				+
23.0125	21.7096	21.1841	22.0501	25.6222	25.6565	25.888	25.6475	3	16.5	28.3131	10	+	+	4.11805	3.71446	4.17451	B1APM4;P35610	B1APM4;P35610	Sterol O-acyltransferase 1	SOAT1	29.892	CATALYTIC ACTIVITY: Acyl-CoA + cholesterol = CoA + cholesterol ester. {ECO:0000269|PubMed:18480028}.	2.3.1.26	ACT_SITE 460 460 {ECO:0000269|PubMed:16154994}.	cholesterol efflux [GO:0033344];cholesterol esterification [GO:0034435];cholesterol homeostasis [GO:0042632];cholesterol metabolic process [GO:0008203];cholesterol storage [GO:0010878];macrophage derived foam cell differentiation [GO:0010742];positive regulation of amyloid precursor protein biosynthetic process [GO:0042986];very-low-density lipoprotein particle assembly [GO:0034379]	cholesterol binding [GO:0015485];cholesterol O-acyltransferase activity [GO:0034736];fatty-acyl-CoA binding [GO:0000062];sterol O-acyltransferase activity [GO:0004772];O-acyltransferase activity [GO:0008374]	endoplasmic reticulum [GO:0005783];endoplasmic reticulum membrane [GO:0005789];integral component of membrane [GO:0016021];membrane [GO:0016020];endoplasmic reticulum [GO:0005783];integral component of membrane [GO:0016021]	GO:0000062;GO:0004772;GO:0005783;GO:0005789;GO:0008203;GO:0010742;GO:0010878;GO:0015485;GO:0016020;GO:0016021;GO:0033344;GO:0034379;GO:0034435;GO:0034736;GO:0042632;GO:0042986;GO:0005783;GO:0008374;GO:0016021						+				+	+					+			+	+
22.8927	22.9371	22.7465	22.6793	26.5567	26.3362	26.9899	25.9711	8	17.4	29.0553	19	+	+	5.49758	3.64958	5.05877	Q16880;D6RFW2	Q16880	2-hydroxyacylsphingosine 1-beta-galactosyltransferase	UGT8	61.437	CATALYTIC ACTIVITY: UDP-alpha-D-galactose + 2-(2-hydroxyacyl)sphingosine = UDP + 1-(beta-D-galactosyl)-2-(2-hydroxyacyl)sphingosine.	2.4.1.45		central nervous system development [GO:0007417];cytoskeleton organization [GO:0007010];flavonoid biosynthetic process [GO:0009813];flavonoid glucuronidation [GO:0052696];galactosylceramide biosynthetic process [GO:0006682];glycosphingolipid metabolic process [GO:0006687];neuron projection morphogenesis [GO:0048812];paranodal junction assembly [GO:0030913];peripheral nervous system development [GO…	2-hydroxyacylsphingosine 1-beta-galactosyltransferase activity [GO:0003851];glucuronosyltransferase activity [GO:0015020];N-acylsphingosine galactosyltransferase activity [GO:0047263];UDP-galactose:glucosylceramide beta-1,4-galactosyltransferase activity [GO:0008489];transferase activity, transferring hexosyl groups [GO:0016758]	integral component of membrane [GO:0016021];intracellular membrane-bounded organelle [GO:0043231];plasma membrane [GO:0005886]	GO:0002175;GO:0003851;GO:0005886;GO:0006682;GO:0006687;GO:0007010;GO:0007417;GO:0007422;GO:0008489;GO:0009813;GO:0015020;GO:0016021;GO:0030913;GO:0043231;GO:0047263;GO:0048812;GO:0052696;GO:0008152;GO:0016758											+
22.353	21.5468	22.1766	22.3484	26.1454	25.7082	25.3756	25.5874	6	16.5	28.319	12	+	+	5.14559	3.59796	4.79327	O14975;G3V1R7	O14975;G3V1R7	Very long-chain acyl-CoA synthetase	SLC27A2	70.311	CATALYTIC ACTIVITY: ATP + a long-chain fatty acid + CoA = AMP + diphosphate + an acyl-CoA. {ECO:0000269|PubMed:11980911}.;CATALYTIC ACTIVITY: ATP + a very-long-chain carboxylic acid + CoA = AMP + diphosphate + an acyl-CoA. {ECO:0000269|PubMed:11980911}.	6.2.1.-;6.2.1.3		bile acid biosynthetic process [GO:0006699];fatty acid alpha-oxidation [GO:0001561];fatty acid beta-oxidation [GO:0006635];long-chain fatty acid import [GO:0044539];long-chain fatty acid metabolic process [GO:0001676];methyl-branched fatty acid metabolic process [GO:0097089];very long-chain fatty acid catabolic process [GO:0042760];fatty acid transport [GO:0015908]	ATP binding [GO:0005524];decanoate--CoA ligase activity [GO:0102391];enzyme binding [GO:0019899];fatty acid transporter activity [GO:0015245];long-chain fatty acid-CoA ligase activity [GO:0004467];phytanate-CoA ligase activity [GO:0050197];pristanate-CoA ligase activity [GO:0070251];receptor binding [GO:0005102];very long-chain fatty acid-CoA ligase activity [GO:0031957];long-chain fatty acid-CoA…	endoplasmic reticulum lumen [GO:0005788];endoplasmic reticulum membrane [GO:0005789];extracellular exosome [GO:0070062];integral component of endoplasmic reticulum membrane [GO:0030176];integral component of peroxisomal membrane [GO:0005779];mitochondrion [GO:0005739];peroxisomal membrane [GO:0005778];integral component of membrane [GO:0016021]	GO:0001561;GO:0001676;GO:0004467;GO:0005102;GO:0005524;GO:0005739;GO:0005778;GO:0005779;GO:0005788;GO:0005789;GO:0006635;GO:0006699;GO:0015245;GO:0019899;GO:0030176;GO:0031957;GO:0042760;GO:0044539;GO:0050197;GO:0070062;GO:0070251;GO:0097089;GO:0102391;GO:0004467;GO:0015908;GO:0016021;GO:0031957							+				+					+			+	+
21.9629	22.8457	22.1097	21.9997	25.483	25.557	26.7867	25.3135	5	11.6	28.4504	10	+	+	3.96866	3.55555	3.96594	Q8IV08;M0R1F7;M0R3G9	Q8IV08	Phospholipase D3	PLD3	54.705	CATALYTIC ACTIVITY: A phosphatidylcholine + H(2)O = choline + a phosphatidate.	3.1.4.4	ACT_SITE 201 201 {ECO:0000255|PROSITE-ProRule:PRU00153}.;ACT_SITE 203 203 {ECO:0000255|PROSITE-ProRule:PRU00153}.;ACT_SITE 208 208 {ECO:0000255|PROSITE-ProRule:PRU00153}.	lipid catabolic process [GO:0016042]	N-acylphosphatidylethanolamine-specific phospholipase D activity [GO:0070290];phospholipase D activity [GO:0004630]	endoplasmic reticulum membrane [GO:0005789];extracellular exosome [GO:0070062];integral component of membrane [GO:0016021];integral component of membrane [GO:0016021]	GO:0004630;GO:0005789;GO:0016021;GO:0016042;GO:0070062;GO:0070290;GO:0016021							+				+
22.6585	21.4464	22.4884	22.0007	25.5214	25.7868	25.6219	25.8737	6	14	28.2234	19	+	+	4.79912	3.55246	4.53266	Q9UBV2;G3V3B3	Q9UBV2	Protein sel-1 homolog 1	SEL1L	88.754				endoplasmic reticulum mannose trimming [GO:1904380];ERAD pathway [GO:0036503];ER-associated ubiquitin-dependent protein catabolic process [GO:0030433];Notch signaling pathway [GO:0007219];protein secretion [GO:0009306];protein stabilization [GO:0050821];retrograde protein transport, ER to cytosol [GO:0030970];triglyceride metabolic process [GO:0006641]		Derlin-1 retrotranslocation complex [GO:0036513];endoplasmic reticulum [GO:0005783];endoplasmic reticulum membrane [GO:0005789];endoplasmic reticulum quality control compartment [GO:0044322];Hrd1p ubiquitin ligase complex [GO:0000836];Hrd1p ubiquitin ligase ERAD-L complex [GO:0000839];integral component of membrane [GO:0016021]	GO:0000836;GO:0000839;GO:0005783;GO:0005789;GO:0006641;GO:0007219;GO:0009306;GO:0016021;GO:0030433;GO:0030970;GO:0036503;GO:0036513;GO:0044322;GO:0050821;GO:1904380							+				+						+		+
21.7786	21.7902	22.5392	21.9324	25.4818	25.267	25.5436	25.9196	9	14.9	28.0894	22	+	+	5.37726	3.54292	4.88454	O15228;Q5TBH8;Q5TBH6	O15228;Q5TBH8	Dihydroxyacetone phosphate acyltransferase	GNPAT	77.187	CATALYTIC ACTIVITY: Acyl-CoA + glycerone phosphate = CoA + acylglycerone phosphate.	2.3.1.42		cerebellum morphogenesis [GO:0021587];ether lipid biosynthetic process [GO:0008611];glycerophospholipid metabolic process [GO:0006650];membrane organization [GO:0061024];paranodal junction assembly [GO:0030913];phosphatidic acid biosynthetic process [GO:0006654];response to drug [GO:0042493];response to fatty acid [GO:0070542];response to nutrient [GO:0007584];response to starvation [GO:0042594];…	glycerone-phosphate O-acyltransferase activity [GO:0016287];palmitoyl-CoA hydrolase activity [GO:0016290];receptor binding [GO:0005102];O-acyltransferase activity [GO:0008374];glycerone-phosphate O-acyltransferase activity [GO:0016287]	membrane [GO:0016020];mitochondrion [GO:0005739];peroxisomal matrix [GO:0005782];peroxisomal membrane [GO:0005778];peroxisome [GO:0005777];peroxisome [GO:0005777]	GO:0005102;GO:0005739;GO:0005777;GO:0005778;GO:0005782;GO:0006650;GO:0006654;GO:0007416;GO:0007584;GO:0008611;GO:0016020;GO:0016287;GO:0016290;GO:0021587;GO:0030913;GO:0042493;GO:0042594;GO:0061024;GO:0070542;GO:0008374;GO:0044255;GO:0005777;GO:0008611;GO:0016287						+					+	+				+
22.4025	21.9822	21.9001	21.285	24.3253	25.557	26.1613	25.2664	4	15.2	28.0163	13	+	+	3.59714	3.43508	3.62891	E7EVQ6;Q14534;H0YBN7;E5RJH9	E7EVQ6;Q14534;H0YBN7	Squalene monooxygenase	SQLE	53.067	CATALYTIC ACTIVITY: Squalene + [reduced NADPH--hemoprotein reductase] + O(2) = (3S)-2,3-epoxy-2,3-dihydrosqualene + [oxidized NADPH--hemoprotein reductase] + H(2)O.	1.14.14.17		cellular aromatic compound metabolic process [GO:0006725];cholesterol biosynthetic process [GO:0006695];cholesterol metabolic process [GO:0008203];response to organic substance [GO:0010033];sterol biosynthetic process [GO:0016126]	flavin adenine dinucleotide binding [GO:0050660];squalene monooxygenase activity [GO:0004506];flavin adenine dinucleotide binding [GO:0050660];squalene monooxygenase activity [GO:0004506];flavin adenine dinucleotide binding [GO:0050660];squalene monooxygenase activity [GO:0004506];FAD binding [GO:0071949];oxidoreductase activity [GO:0016491]	endoplasmic reticulum [GO:0005783];endoplasmic reticulum membrane [GO:0005789];integral component of membrane [GO:0016021];organelle membrane [GO:0031090];integral component of membrane [GO:0016021];integral component of membrane [GO:0016021]	GO:0004506;GO:0005783;GO:0005789;GO:0006695;GO:0006725;GO:0008203;GO:0010033;GO:0016021;GO:0016126;GO:0031090;GO:0050660;GO:0004506;GO:0016021;GO:0050660;GO:0004506;GO:0016021;GO:0050660;GO:0016491;GO:0071949											+		+			+
21.7538	22.2493	22.3111	21.7904	24.9082	25.2513	25.619	25.922	4	11	27.9707	10	+	+	4.86012	3.39897	4.44307	Q2TAA5	Q2TAA5	GDP-Man:Man(3)GlcNAc(2)-PP-Dol alpha-1,2-mannosyltransferase	ALG11	55.65	CATALYTIC ACTIVITY: 2 GDP-alpha-D-mannose + D-Man-alpha-(1->3)-(D-Man-alpha-(1->6))-D-Man-beta-(1->4)-D-GlcNAc-beta-(1->4)-D-GlcNAc-diphosphodolichol = 2 GDP + D-Man-alpha-(1->2)-D-Man-alpha-(1->2)-D-Man-alpha-(1->3)-(D-Man-alpha-(1->6))-D-Man-beta-(1->4)-D-GlcNAc-beta-(1->4)-D-GlcNAc-diphosphodolichol. {ECO:0000269|PubMed:20080937}.	2.4.1.131			GDP-Man:Man3GlcNAc2-PP-Dol alpha-1,2-mannosyltransferase activity [GO:0004377]	endoplasmic reticulum membrane [GO:0005789];integral component of membrane [GO:0016021];membrane [GO:0016020]	GO:0004377;GO:0005789;GO:0016020;GO:0016021											+
22.0485	21.9578	22.0375	22.6162	25.1129	25.6558	25.3629	25.7078	5	14.9	28.047	17	+	+	5.42922	3.29487	4.67135	Q86UL3;E5RIA1;E5RHA6	Q86UL3	Glycerol-3-phosphate acyltransferase 4	AGPAT6	52.07	CATALYTIC ACTIVITY: Acyl-CoA + sn-glycerol 3-phosphate = CoA + 1-acyl-sn-glycerol 3-phosphate.	2.3.1.15		acyl-CoA metabolic process [GO:0006637];CDP-diacylglycerol biosynthetic process [GO:0016024];diacylglycerol metabolic process [GO:0046339];fatty acid metabolic process [GO:0006631];glandular epithelial cell maturation [GO:0002071];lactation [GO:0007595];lipid biosynthetic process [GO:0008610];phosphatidic acid biosynthetic process [GO:0006654];phosphatidylcholine biosynthetic process [GO:0006656]…	1-acylglycerol-3-phosphate O-acyltransferase activity [GO:0003841];glycerol-3-phosphate O-acyltransferase activity [GO:0004366]	endoplasmic reticulum [GO:0005783];endoplasmic reticulum membrane [GO:0005789];integral component of membrane [GO:0016021];membrane [GO:0016020];integral component of membrane [GO:0016021];integral component of membrane [GO:0016021]	GO:0002071;GO:0003841;GO:0004366;GO:0005783;GO:0005789;GO:0006631;GO:0006637;GO:0006654;GO:0006656;GO:0007595;GO:0008610;GO:0016020;GO:0016021;GO:0016024;GO:0019432;GO:0040014;GO:0046339;GO:0016021;GO:0016021						+		+			+					+			+
23.2222	22.8951	21.8871	22.2383	25.575	26.1489	25.3423	25.7761	4	18.4	28.2893	9	+	+	3.98811	3.1499	3.7123	E9PG39;E9PC15;Q53H12;A0A0G2JLD0;A0A0G2JLG5	E9PG39;E9PC15;Q53H12	Acylglycerol kinase, mitochondrial	AGK	26.925	CATALYTIC ACTIVITY: ATP + acylglycerol = ADP + acyl-sn-glycerol 3-phosphate.;CATALYTIC ACTIVITY: ATP + 1,2-diacyl-sn-glycerol = ADP + 1,2-diacyl-sn-glycerol 3-phosphate.	2.7.1.107;2.7.1.94		ceramide biosynthetic process [GO:0046513];glycerolipid metabolic process [GO:0046486];long-chain fatty-acyl-CoA biosynthetic process [GO:0035338]	acylglycerol kinase activity [GO:0047620];ATP binding [GO:0005524];ceramide kinase activity [GO:0001729];diacylglycerol kinase activity [GO:0004143];NAD+ kinase activity [GO:0003951];NAD+ kinase activity [GO:0003951];NAD+ kinase activity [GO:0003951]	intracellular membrane-bounded organelle [GO:0043231];mitochondrial outer membrane [GO:0005741];mitochondrion [GO:0005739];intracellular membrane-bounded organelle [GO:0043231];mitochondrion [GO:0005739]	GO:0001729;GO:0003951;GO:0004143;GO:0005524;GO:0005739;GO:0005741;GO:0035338;GO:0043231;GO:0046486;GO:0046513;GO:0047620;GO:0003951;GO:0003951;GO:0005739;GO:0043231								+			+
21.7038	23.1086	21.7391	22.2675	24.9051	25.489	25.6563	25.2969	6	17.5	27.8813	12	+	+	3.85891	3.1321	3.6194	Q7L5N7;H3BU68	Q7L5N7;H3BU68	Lysophosphatidylcholine acyltransferase 2	LPCAT2	60.207	CATALYTIC ACTIVITY: Acyl-CoA + 1-acyl-sn-glycero-3-phosphocholine = CoA + 1,2-diacyl-sn-glycero-3-phosphocholine. {ECO:0000269|PubMed:20363836}.;CATALYTIC ACTIVITY: Acetyl-CoA + 1-alkyl-sn-glycero-3-phosphocholine = CoA + 2-acetyl-1-alkyl-sn-glycero-3-phosphocholine. {ECO:0000269|PubMed:20363836}.;CATALYTIC ACTIVITY: Acyl-CoA + 1-acyl-sn-glycerol 3-phosphate = CoA + 1,2-diacyl-sn-glycerol 3-phosp…	2.3.1.23;2.3.1.51;2.3.1.67		membrane organization [GO:0061024];phosphatidylcholine acyl-chain remodeling [GO:0036151];platelet activating factor biosynthetic process [GO:0006663];metabolic process [GO:0008152]	1-acylglycerol-3-phosphate O-acyltransferase activity [GO:0003841];1-acylglycerophosphocholine O-acyltransferase activity [GO:0047184];1-alkylglycerophosphocholine O-acetyltransferase activity [GO:0047192];2-acylglycerol-3-phosphate O-acyltransferase activity [GO:0047144];calcium ion binding [GO:0005509];transferase activity, transferring acyl groups [GO:0016746]	endoplasmic reticulum [GO:0005783];endoplasmic reticulum membrane [GO:0005789];Golgi membrane [GO:0000139];Golgi stack [GO:0005795];integral component of membrane [GO:0016021];lipid particle [GO:0005811]	GO:0000139;GO:0003841;GO:0005509;GO:0005783;GO:0005789;GO:0005795;GO:0005811;GO:0006663;GO:0016021;GO:0036151;GO:0047144;GO:0047184;GO:0047192;GO:0061024;GO:0008152;GO:0016746						+					+	+
22.2326	21.665	21.6256	22.1607	24.714	24.9239	24.8119	25.0633	5	5.6	27.4441	10	+	+	5.53554	2.95729	4.3696	O15118;K7EQ23	O15118;K7EQ23	Niemann-Pick C1 protein	NPC1	142.17				adult walking behavior [GO:0007628];autophagy [GO:0006914];bile acid metabolic process [GO:0008206];cellular response to low-density lipoprotein particle stimulus [GO:0071404];cellular response to steroid hormone stimulus [GO:0071383];cholesterol efflux [GO:0033344];cholesterol homeostasis [GO:0042632];cholesterol metabolic process [GO:0008203];cholesterol transport [GO:0030301];endocytosis [GO:0…	cholesterol binding [GO:0015485];receptor activity [GO:0004872];sterol transporter activity [GO:0015248];transmembrane signaling receptor activity [GO:0004888];virus receptor activity [GO:0001618];lipid transporter activity [GO:0005319]	endoplasmic reticulum [GO:0005783];extracellular exosome [GO:0070062];extracellular region [GO:0005576];Golgi apparatus [GO:0005794];integral component of membrane [GO:0016021];integral component of plasma membrane [GO:0005887];late endosome membrane [GO:0031902];lysosomal membrane [GO:0005765];lysosome [GO:0005764];membrane [GO:0016020];membrane raft [GO:0045121];nuclear envelope [GO:0005635];pe…	GO:0001618;GO:0004872;GO:0004888;GO:0005576;GO:0005635;GO:0005764;GO:0005765;GO:0005783;GO:0005794;GO:0005887;GO:0006486;GO:0006897;GO:0006914;GO:0007041;GO:0007628;GO:0008203;GO:0008206;GO:0015248;GO:0015485;GO:0016020;GO:0016021;GO:0016242;GO:0030301;GO:0031579;GO:0031902;GO:0033344;GO:0042493;GO:0042632;GO:0045121;GO:0046686;GO:0046718;GO:0048471;GO:0060548;GO:0070062;GO:0071383;GO:0071404;GO:…							+			+	+	+				+			+	+
23.0334	22.6248	22.7583	22.5769	25.2746	25.5808	25.9624	25.7658	4	16.8	28.2479	17	+	+	5.45779	2.89751	4.27006	Q9NUQ2;H0YC22	Q9NUQ2	1-acyl-sn-glycerol-3-phosphate acyltransferase epsilon	AGPAT5	42.072	CATALYTIC ACTIVITY: Acyl-CoA + 1-acyl-sn-glycerol 3-phosphate = CoA + 1,2-diacyl-sn-glycerol 3-phosphate.	2.3.1.51		CDP-diacylglycerol biosynthetic process [GO:0016024];hematopoietic progenitor cell differentiation [GO:0002244];phosphatidic acid biosynthetic process [GO:0006654];phospholipid biosynthetic process [GO:0008654];triglyceride biosynthetic process [GO:0019432]	1-acylglycerol-3-phosphate O-acyltransferase activity [GO:0003841]	endoplasmic reticulum membrane [GO:0005789];integral component of membrane [GO:0016021];mitochondrial outer membrane [GO:0005741];mitochondrion [GO:0005739];nuclear envelope [GO:0005635];integral component of membrane [GO:0016021]	GO:0002244;GO:0003841;GO:0005635;GO:0005739;GO:0005741;GO:0005789;GO:0006654;GO:0008654;GO:0016021;GO:0016024;GO:0019432;GO:0016021						+					+
21.053	22.2913	25.3937	21.9233	25.4507	25.5026	25.983	25.315	5	12.8	28.3649	10	+	+	1.63526	2.89749	1.98877	A0A0C4DFL7;Q16850;H7C0D0	A0A0C4DFL7;Q16850	Lanosterol 14-alpha demethylase	CYP51A1	57.278	CATALYTIC ACTIVITY: A 14-alpha-methylsteroid + 3 O(2) + 3 NADPH = a Delta(14)-steroid + formate + 3 NADP(+) + 4 H(2)O. {ECO:0000269|PubMed:20149798}.	1.14.13.70		cholesterol biosynthetic process [GO:0006695];cholesterol biosynthetic process via 24,25-dihydrolanosterol [GO:0033488];steroid biosynthetic process [GO:0006694];sterol metabolic process [GO:0016125];cholesterol biosynthetic process via 24,25-dihydrolanosterol [GO:0033488]	heme binding [GO:0020037];iron ion binding [GO:0005506];sterol 14-demethylase activity [GO:0008398];heme binding [GO:0020037];iron ion binding [GO:0005506];sterol 14-demethylase activity [GO:0008398];heme binding [GO:0020037];iron ion binding [GO:0005506];monooxygenase activity [GO:0004497];oxidoreductase activity, acting on paired donors, with incorporation or reduction of molecular oxygen [GO:0…	endoplasmic reticulum [GO:0005783];endoplasmic reticulum membrane [GO:0005789];integral component of membrane [GO:0016021];membrane [GO:0016020];organelle membrane [GO:0031090];plasma membrane [GO:0005886];integral component of membrane [GO:0016021];intracellular membrane-bounded organelle [GO:0043231]	GO:0005506;GO:0005783;GO:0005789;GO:0005886;GO:0006694;GO:0006695;GO:0008398;GO:0016020;GO:0016021;GO:0016125;GO:0020037;GO:0031090;GO:0033488;GO:0005506;GO:0008398;GO:0016021;GO:0020037;GO:0033488;GO:0043231;GO:0004497;GO:0005506;GO:0016705;GO:0020037											+		+			+
21.4328	22.572	22.5609	21.8572	25.0386	24.4978	24.8666	24.7442	3	8.6	27.4413	10	+	+	3.94429	2.68107	3.34301	Q9BT22;K7EID2;A0A087WZJ8;Q6GMV1	Q9BT22;K7EID2	Chitobiosyldiphosphodolichol beta-mannosyltransferase	ALG1	52.518	CATALYTIC ACTIVITY: GDP-mannose + chitobiosyldiphosphodolichol = GDP + beta-1,4-D-mannosylchitobiosyldiphosphodolichol.	2.4.1.-;2.4.1.142		protein glycosylation [GO:0006486];dolichol-linked oligosaccharide biosynthetic process [GO:0006488];lipopolysaccharide biosynthetic process [GO:0009103];protein glycosylation [GO:0006486]	mannosyltransferase activity [GO:0000030];chitobiosyldiphosphodolichol beta-mannosyltransferase activity [GO:0004578];mannosyltransferase activity [GO:0000030];transferase activity, transferring glycosyl groups [GO:0016757];transferase activity, transferring glycosyl groups [GO:0016757]	endoplasmic reticulum [GO:0005783];endoplasmic reticulum [GO:0005783];endoplasmic reticulum membrane [GO:0005789];integral component of membrane [GO:0016021];membrane [GO:0016020]	GO:0000030;GO:0005783;GO:0006486;GO:0000030;GO:0004578;GO:0005783;GO:0005789;GO:0006486;GO:0006488;GO:0009103;GO:0016020;GO:0016021;GO:0016757;GO:0016757											+
22.9882	22.2633	23.3357	23.0967	25.6949	25.5863	25.5047	25.5789	8	18.1	28.1425	24	+	+	4.56367	2.67026	3.63683	A0A0G2JJD3;O95870;A0A0G2JI89	A0A0G2JJD3;O95870;A0A0G2JI89	Abhydrolase domain-containing protein 16A	ABHD16A	67.518		3.-.-.-	ACT_SITE 355 355 Charge relay system. {ECO:0000250}.;ACT_SITE 430 430 Charge relay system. {ECO:0000250}.;ACT_SITE 507 507 Charge relay system. {ECO:0000250}.	monoacylglycerol catabolic process [GO:0052651];prostaglandin catabolic process [GO:1905344]	acylglycerol lipase activity [GO:0047372]	integral component of membrane [GO:0016021];integral component of membrane [GO:0016021]	GO:0016021;GO:0047372;GO:0052651;GO:1905344;GO:0016021				+			+				+					+
22.3758	22.3701	22.0034	21.9456	24.6735	24.7211	24.77	24.7581	4	21.7	27.2645	8	+	+	6.20746	2.55696	4.13969	H0YCW6;A0A087WZ62;Q9H6U8	H0YCW6;A0A087WZ62;Q9H6U8	Alpha-1,2-mannosyltransferase ALG9	ALG9	24.198	CATALYTIC ACTIVITY: Dolichyl beta-D-mannosyl phosphate + D-Man-alpha-(1->2)-D-Man-alpha-(1->2)-D-Man-alpha-(1->3)-(D-Man-alpha-(1->3)-D-Man-alpha-(1->6))-D-Man-beta-(1->4)-D-GlcNAc-beta-(1->4)-D-GlcNAc-diphosphodolichol = D-Man-alpha-(1->2)-D-Man-alpha-(1->2)-D-Man-alpha-(1->3)-(D-Man-alpha-(1->2)-D-Man-alpha-(1->3)-D-Man-alpha-(1->6))-D-Man-beta-(1->4)-D-GlcNAc-beta-(1->4)-D-GlcNAc-diphosphodoli…	2.4.1.259;2.4.1.261;2.4.1.-;2.4.1.-		dolichol-linked oligosaccharide biosynthetic process [GO:0006488];protein glycosylation [GO:0006486]	alpha-1,2-mannosyltransferase activity [GO:0000026];dol-P-Man:Man(6)GlcNAc(2)-PP-Dol alpha-1,2-mannosyltransferase activity [GO:0052926];dol-P-Man:Man(8)GlcNAc(2)-PP-Dol alpha-1,2-mannosyltransferase activity [GO:0052918];mannosyltransferase activity [GO:0000030];transferase activity, transferring glycosyl groups [GO:0016757];transferase activity, transferring glycosyl groups [GO:0016757]	endoplasmic reticulum [GO:0005783];endoplasmic reticulum membrane [GO:0005789];integral component of membrane [GO:0016021];membrane [GO:0016020];endoplasmic reticulum membrane [GO:0005789];endoplasmic reticulum membrane [GO:0005789];integral component of membrane [GO:0016021]	GO:0000026;GO:0000030;GO:0005783;GO:0005789;GO:0006486;GO:0006488;GO:0016020;GO:0016021;GO:0052918;GO:0052926;GO:0005789;GO:0016757;GO:0005789;GO:0016021;GO:0016757											+
21.4492	21.9046	21.6966	21.4428	24.447	22.3931	24.6255	24.5623	3	8.6	27.0738	7	+	+	2.30728	2.38364	2.26907	A0A0R4J2G3;A0A0A0MTJ9;Q6PIU2;H7C046	A0A0R4J2G3;A0A0A0MTJ9;Q6PIU2;H7C046	Neutral cholesterol ester hydrolase 1	NCEH1	49.062		3.1.1.-	ACT_SITE 191 191 {ECO:0000255|PROSITE-ProRule:PRU10038}.;ACT_SITE 348 348 {ECO:0000255|PROSITE-ProRule:PRU10038}.;ACT_SITE 378 378 {ECO:0000255|PROSITE-ProRule:PRU10038}.;ACT_SITE 231 231 {ECO:0000256|PIRSR:PIRSR037251-1}.;ACT_SITE 388 388 {ECO:0000256|PIRSR:PIRSR037251-1}.;ACT_SITE 418 418 {ECO:0000256|PIRSR:PIRSR037251-1}.;ACT_SITE 223 223 {ECO:0000256|PIRSR:PIRSR037251-1}.;ACT_SITE 380 380 {EC…	catabolic process [GO:0009056];lipid catabolic process [GO:0016042];xenobiotic metabolic process [GO:0006805];metabolic process [GO:0008152];protein dephosphorylation [GO:0006470];SMAD protein signal transduction [GO:0060395];xenobiotic metabolic process [GO:0006805];metabolic process [GO:0008152]	serine hydrolase activity [GO:0017171];sterol esterase activity [GO:0004771];hydrolase activity [GO:0016787];carboxylic ester hydrolase activity [GO:0052689];phosphate ion binding [GO:0042301];serine hydrolase activity [GO:0017171];carboxylic ester hydrolase activity [GO:0052689]	endoplasmic reticulum membrane [GO:0005789];integral component of membrane [GO:0016021];membrane [GO:0016020];integral component of membrane [GO:0016021];integral component of membrane [GO:0016021];integral component of membrane [GO:0016021]	GO:0004771;GO:0005789;GO:0006805;GO:0009056;GO:0016020;GO:0016021;GO:0016042;GO:0017171;GO:0008152;GO:0016021;GO:0016787;GO:0006470;GO:0006805;GO:0016021;GO:0017171;GO:0042301;GO:0052689;GO:0060395;GO:0008152;GO:0016021;GO:0052689				+	+		+				+								+	+
23.9848	24.4371	23.5562	24.3361	25.7645	26.0791	26.6333	26.8536	10	20.5	29.1973	35	+	+	3.39114	2.25406	2.75032	P28288	P28288	ATP-binding cassette sub-family D member 3	ABCD3	75.475				fatty acid beta-oxidation [GO:0006635];fatty acid biosynthetic process [GO:0006633];peroxisomal long-chain fatty acid import [GO:0015910];peroxisome organization [GO:0007031];response to drug [GO:0042493];response to organic cyclic compound [GO:0014070];transmembrane transport [GO:0055085];very long-chain fatty acid catabolic process [GO:0042760]	ATPase activity [GO:0016887];ATPase activity, coupled to transmembrane movement of substances [GO:0042626];ATP binding [GO:0005524];long-chain fatty acid transporter activity [GO:0005324];protein homodimerization activity [GO:0042803]	cytosol [GO:0005829];integral component of membrane [GO:0016021];intracellular membrane-bounded organelle [GO:0043231];membrane [GO:0016020];mitochondrial inner membrane [GO:0005743];peroxisomal matrix [GO:0005782];peroxisomal membrane [GO:0005778];peroxisome [GO:0005777]	GO:0005324;GO:0005524;GO:0005743;GO:0005777;GO:0005778;GO:0005782;GO:0005829;GO:0006633;GO:0006635;GO:0007031;GO:0014070;GO:0015910;GO:0016020;GO:0016021;GO:0016887;GO:0042493;GO:0042626;GO:0042760;GO:0042803;GO:0043231;GO:0055085							+				+					+	+	+	+
23.4731	22.3651	22.6225	23.417	25.1968	24.9393	25.2164	25.4795	3	12.6	27.9474	17	+	+	3.51839	2.23857	2.79547	Q15738;C9JDR0	Q15738;C9JDR0	Sterol-4-alpha-carboxylate 3-dehydrogenase, decarboxylating	NSDHL	41.9	CATALYTIC ACTIVITY: A 3-beta-hydroxysteroid-4-alpha-carboxylate + NAD(P)(+) = a 3-oxosteroid + CO(2) + NAD(P)H.	1.1.1.170	ACT_SITE 172 172 Proton acceptor. {ECO:0000250}.	cholesterol biosynthetic process [GO:0006695];hair follicle development [GO:0001942];labyrinthine layer blood vessel development [GO:0060716];smoothened signaling pathway [GO:0007224];steroid biosynthetic process [GO:0006694]	3-beta-hydroxy-delta5-steroid dehydrogenase activity [GO:0003854];C-3 sterol dehydrogenase (C-4 sterol decarboxylase) activity [GO:0000252];sterol-4-alpha-carboxylate 3-dehydrogenase (decarboxylating) activity [GO:0047012];3-beta-hydroxy-delta5-steroid dehydrogenase activity [GO:0003854]	endoplasmic reticulum [GO:0005783];endoplasmic reticulum membrane [GO:0005789];integral component of membrane [GO:0016021];intracellular membrane-bounded organelle [GO:0043231];lipid particle [GO:0005811];endoplasmic reticulum [GO:0005783];intracellular membrane-bounded organelle [GO:0043231]	GO:0000252;GO:0001942;GO:0003854;GO:0005783;GO:0005789;GO:0005811;GO:0006695;GO:0007224;GO:0016021;GO:0043231;GO:0047012;GO:0060716;GO:0003854;GO:0005783;GO:0006694;GO:0043231											+		+			+
21.8619	23.6691	21.9263	21.9487	24.7821	24.4839	24.2665	24.7604	3	24.3	27.0858	6	+	+	2.55276	2.22173	2.32299	P84077;P61204;F5H423;H0YGG7	P84077;P61204;F5H423	ADP-ribosylation factor 1;ADP-ribosylation factor 3	ARF1;ARF3	20.697				phosphatidylinositol biosynthetic process [GO:0006661];protein transport [GO:0015031];retrograde vesicle-mediated transport, Golgi to ER [GO:0006890];small GTPase mediated signal transduction [GO:0007264];actin filament organization [GO:0007015];antigen processing and presentation of exogenous peptide antigen via MHC class II [GO:0019886];cellular copper ion homeostasis [GO:0006878];dendritic spi…	GTPase activity [GO:0003924];GTP binding [GO:0005525];GDP binding [GO:0019003];GTPase activity [GO:0003924];GTP binding [GO:0005525];magnesium ion binding [GO:0000287];phospholipase D activator activity [GO:1990583];poly(A) RNA binding [GO:0044822];signal transducer activity, downstream of receptor [GO:0005057];GTP binding [GO:0005525];GTP binding [GO:0005525]	extracellular exosome [GO:0070062];Golgi membrane [GO:0000139];perinuclear region of cytoplasm [GO:0048471];cell leading edge [GO:0031252];COPI-coated vesicle [GO:0030137];cytosol [GO:0005829];extracellular exosome [GO:0070062];focal adhesion [GO:0005925];Golgi membrane [GO:0000139];late endosome [GO:0005770];neuron projection [GO:0043005];perinuclear region of cytoplasm [GO:0048471];peroxisomal …	GO:0000139;GO:0003924;GO:0005525;GO:0006661;GO:0006890;GO:0007264;GO:0015031;GO:0048471;GO:0070062;GO:0000139;GO:0000287;GO:0002090;GO:0003924;GO:0005057;GO:0005525;GO:0005770;GO:0005778;GO:0005802;GO:0005829;GO:0005886;GO:0005925;GO:0006661;GO:0006878;GO:0006892;GO:0007015;GO:0007264;GO:0014069;GO:0015031;GO:0019003;GO:0019886;GO:0030017;GO:0030137;GO:0031252;GO:0034315;GO:0034379;GO:0043005;GO:…										+	+	+							+	+
27.9442	28.6952	28.7748	28.6734	30.5951	30.5696	30.9617	30.2372	12	64.6	33.4698	90	+	+	3.83352	2.069	2.78134	P21964;E7EMS6;E7EUU8;F8WBW9;H7BZ45	P21964;E7EMS6;E7EUU8	Catechol O-methyltransferase	COMT	30.037	CATALYTIC ACTIVITY: S-adenosyl-L-methionine + a catechol = S-adenosyl-L-homocysteine + a guaiacol.	2.1.1.6		cellular response to phosphate starvation [GO:0016036];developmental process [GO:0032502];dopamine catabolic process [GO:0042420];estrogen metabolic process [GO:0008210];female pregnancy [GO:0007565];learning [GO:0007612];methylation [GO:0032259];multicellular organismal reproductive process [GO:0048609];negative regulation of dopamine metabolic process [GO:0045963];negative regulation of renal s…	catechol O-methyltransferase activity [GO:0016206];magnesium ion binding [GO:0000287];methyltransferase activity [GO:0008168];O-methyltransferase activity [GO:0008171];O-methyltransferase activity [GO:0008171];O-methyltransferase activity [GO:0008171];catechol O-methyltransferase activity [GO:0016206];magnesium ion binding [GO:0000287];catechol O-methyltransferase activity [GO:0016206];magnesium …	axon [GO:0030424];cell body [GO:0044297];cytosol [GO:0005829];dendritic spine [GO:0043197];extracellular exosome [GO:0070062];integral component of membrane [GO:0016021];membrane [GO:0016020];mitochondrion [GO:0005739];plasma membrane [GO:0005886];postsynaptic membrane [GO:0045211]	GO:0000287;GO:0005739;GO:0005829;GO:0005886;GO:0007565;GO:0007612;GO:0007614;GO:0008168;GO:0008171;GO:0008210;GO:0014070;GO:0016020;GO:0016021;GO:0016036;GO:0016206;GO:0030424;GO:0032259;GO:0032496;GO:0032502;GO:0035814;GO:0042135;GO:0042420;GO:0042493;GO:0043197;GO:0044297;GO:0045211;GO:0045963;GO:0048265;GO:0048609;GO:0048662;GO:0050668;GO:0051930;GO:0070062;GO:0008171;GO:0008171;GO:0000287;GO:…							+				+
22.5792	22.1286	22.579	23.1324	28.9043	28.8857	29.0466	29.3438	8	35.1	31.5628	27	+	+	6.85011	6.44029	8.80905	P30519;A0A087WT44;I3L159;I3L1F5;I3L4P8;A0A1B0GXH0;I3L463;I3L1Y2;I3L276	P30519;A0A087WT44;I3L159;I3L1F5	Heme oxygenase 2	HMOX2	36.032	CATALYTIC ACTIVITY: Protoheme + 3 [reduced NADPH--hemoprotein reductase] + 3 O(2) = biliverdin + Fe(2+) + CO + 3 [oxidized NADPH--hemoprotein reductase] + 3 H(2)O. {ECO:0000250|UniProtKB:O48782}.	1.14.14.18		cellular iron ion homeostasis [GO:0006879];heme catabolic process [GO:0042167];heme oxidation [GO:0006788];iron ion homeostasis [GO:0055072];response to hypoxia [GO:0001666];response to oxidative stress [GO:0006979];heme oxidation [GO:0006788];heme oxidation [GO:0006788];heme oxidation [GO:0006788];heme oxidation [GO:0006788];heme oxidation [GO:0006788];heme oxidation [GO:0006788];heme oxidation …	heme binding [GO:0020037];heme oxygenase (decyclizing) activity [GO:0004392];metal ion binding [GO:0046872];heme oxygenase (decyclizing) activity [GO:0004392];heme oxygenase (decyclizing) activity [GO:0004392];metal ion binding [GO:0046872];heme oxygenase (decyclizing) activity [GO:0004392];heme oxygenase (decyclizing) activity [GO:0004392];heme oxygenase (decyclizing) activity [GO:0004392];heme …	endoplasmic reticulum membrane [GO:0005789];membrane [GO:0016020];plasma membrane [GO:0005886];integral component of membrane [GO:0016021]	GO:0001666;GO:0004392;GO:0005789;GO:0005886;GO:0006788;GO:0006879;GO:0006979;GO:0016020;GO:0020037;GO:0042167;GO:0046872;GO:0055072;GO:0004392;GO:0006788;GO:0004392;GO:0006788;GO:0046872;GO:0004392;GO:0006788;GO:0004392;GO:0006788;GO:0004392;GO:0006788;GO:0004392;GO:0006788;GO:0046872;GO:0004392;GO:0006788;GO:0004392;GO:0006788;GO:0006979;GO:0016021							+	+		+			+						+	+
20.096	22.8461	22.4233	22.2069	28.0029	28.0504	28.1028	28.4363	10	28.5	30.7245	38	+	+	4.25367	6.255	5.5781	O43615;M0QXU7;M0R301;M0QXM9;M0R124	O43615;M0QXU7	Mitochondrial import inner membrane translocase subunit TIM44	TIMM44	51.355				protein import into mitochondrial matrix [GO:0030150];protein targeting to mitochondrion [GO:0006626]	ATP binding [GO:0005524];chaperone binding [GO:0051087]	mitochondrial inner membrane [GO:0005743];mitochondrial matrix [GO:0005759];mitochondrion [GO:0005739];mitochondrion [GO:0005739]	GO:0005524;GO:0005739;GO:0005743;GO:0005759;GO:0006626;GO:0030150;GO:0051087;GO:0005739															+		+		+
22.9688	21.9964	23.1028	22.6021	28.6006	28.2195	28.3368	28.5265	3	13.2	30.977	12	+	+	6.23099	5.75332	7.54675	B4E1G1;Q9BUN8;E5RGY0	B4E1G1;Q9BUN8	Derlin-1	DERL1	17.033				endoplasmic reticulum unfolded protein response [GO:0030968];ERAD pathway [GO:0036503];ER-associated misfolded protein catabolic process [GO:0071712];ER-associated ubiquitin-dependent protein catabolic process [GO:0030433];establishment of protein localization [GO:0045184];intracellular transport of viral protein in host cell [GO:0019060];positive regulation of protein binding [GO:0032092];positi…	ATPase binding [GO:0051117];MHC class I protein binding [GO:0042288];protease binding [GO:0002020];receptor activity [GO:0004872];ubiquitin protein ligase binding [GO:0031625];ubiquitin-specific protease binding [GO:1990381]	Derlin-1 retrotranslocation complex [GO:0036513];Derlin-1-VIMP complex [GO:0036502];early endosome [GO:0005769];endoplasmic reticulum [GO:0005783];host cell [GO:0043657];integral component of endoplasmic reticulum membrane [GO:0030176];integral component of membrane [GO:0016021];late endosome [GO:0005770];membrane [GO:0016020];endoplasmic reticulum [GO:0005783];endoplasmic reticulum membrane [GO:…	GO:0002020;GO:0004872;GO:0005769;GO:0005770;GO:0005783;GO:0006986;GO:0016020;GO:0016021;GO:0019060;GO:0030176;GO:0030433;GO:0030968;GO:0030970;GO:0031398;GO:0031625;GO:0031648;GO:0032092;GO:0036502;GO:0036503;GO:0036513;GO:0042288;GO:0043657;GO:0045184;GO:0051117;GO:0051260;GO:0071712;GO:1990381;GO:0005783;GO:0005789;GO:0016021;GO:0005783;GO:0005789;GO:0016021							+			+				+			+		+
22.1358	21.1075	22.8755	22.1455	27.6617	27.6209	27.9392	27.8746	19	17.4	30.3353	70	+	+	5.3165	5.70807	6.54752	Q08378;A0A087WV43	Q08378	Golgin subfamily A member 3	GOLGA3	167.35				intra-Golgi vesicle-mediated transport [GO:0006891];spermatogenesis [GO:0007283];spermatogenesis [GO:0007283]	cadherin binding involved in cell-cell adhesion [GO:0098641];transporter activity [GO:0005215]	cell-cell adherens junction [GO:0005913];cytosol [GO:0005829];extrinsic component of Golgi membrane [GO:0090498];Golgi apparatus [GO:0005794];Golgi cisterna membrane [GO:0032580];Golgi membrane [GO:0000139];Golgi transport complex [GO:0017119];membrane [GO:0016020];nucleolus [GO:0005730];nucleoplasm [GO:0005654];nucleus [GO:0005634];extrinsic component of Golgi membrane [GO:0090498]	GO:0000139;GO:0005215;GO:0005634;GO:0005654;GO:0005730;GO:0005794;GO:0005829;GO:0005913;GO:0006891;GO:0007283;GO:0016020;GO:0017119;GO:0032580;GO:0090498;GO:0098641;GO:0007283;GO:0090498																			+	+
22.125	22.2029	21.9907	21.6844	26.6341	26.9855	26.8461	27.0758	9	15.8	29.6971	33	+	+	7.26588	4.88466	7.52307	Q9UGP8	Q9UGP8	Translocation protein SEC63 homolog	SEC63	87.996				IRE1-mediated unfolded protein response [GO:0036498];liver development [GO:0001889];multicellular organism aging [GO:0010259];nitrogen compound metabolic process [GO:0006807];posttranslational protein targeting to membrane [GO:0006620];protein targeting to membrane [GO:0006612];renal system development [GO:0072001];SRP-dependent cotranslational protein targeting to membrane [GO:0006614]	poly(A) RNA binding [GO:0044822];receptor activity [GO:0004872]	cytosol [GO:0005829];endoplasmic reticulum [GO:0005783];endoplasmic reticulum membrane [GO:0005789];integral component of membrane [GO:0016021];membrane [GO:0016020]	GO:0001889;GO:0004872;GO:0005783;GO:0005789;GO:0005829;GO:0006612;GO:0006614;GO:0006620;GO:0006807;GO:0010259;GO:0016020;GO:0016021;GO:0036498;GO:0044822;GO:0072001															+		+		+
21.7789	20.8191	22.2588	21.2622	26.4214	26.1943	26.2698	26.5583	5	17.7	28.8866	13	+	+	5.25327	4.83121	5.8732	Q9BQT8	Q9BQT8	Mitochondrial 2-oxodicarboxylate carrier	SLC25A21	33.303				lysine catabolic process [GO:0006554]	alpha-ketoglutarate transmembrane transporter activity [GO:0015139]	integral component of membrane [GO:0016021];mitochondrial inner membrane [GO:0005743]	GO:0005743;GO:0006554;GO:0015139;GO:0016021							+									+	+	+	+
22.0224	21.8842	22.2133	21.9737	25.672	26.3933	26.6808	26.512	4	16.2	28.891	11	+	+	5.78468	4.29114	5.85616	Q9H2D1;E5RGK5;E5RFL3;E5RGT9	Q9H2D1	Mitochondrial folate transporter/carrier	SLC25A32	35.407				folic acid import into mitochondrion [GO:1904947];folic acid metabolic process [GO:0046655];folic acid transport [GO:0015884];glycine metabolic process [GO:0006544];transport [GO:0006810];transport [GO:0006810];transport [GO:0006810]	folic acid transporter activity [GO:0008517]	integral component of membrane [GO:0016021];mitochondrial inner membrane [GO:0005743];mitochondrion [GO:0005739];integral component of membrane [GO:0016021];integral component of membrane [GO:0016021];integral component of membrane [GO:0016021]	GO:0005739;GO:0005743;GO:0006544;GO:0008517;GO:0015884;GO:0016021;GO:0046655;GO:1904947;GO:0006810;GO:0016021;GO:0006810;GO:0016021;GO:0006810;GO:0016021								+								+	+	+	+
26.2391	26.6036	26.4278	27.0587	30.6096	30.6511	31.0319	31.0089	10	42.2	33.5439	75	+	+	6.03697	4.24311	5.98777	Q9Y6C9	Q9Y6C9	Mitochondrial carrier homolog 2	MTCH2	33.331				hepatocyte apoptotic process [GO:0097284];positive regulation of apoptotic process [GO:0043065];protein localization to mitochondrion [GO:0070585];regulation of mitochondrial membrane permeability involved in apoptotic process [GO:1902108]		extracellular exosome [GO:0070062];integral component of membrane [GO:0016021];membrane [GO:0016020];mitochondrial inner membrane [GO:0005743];mitochondrial outer membrane [GO:0005741];mitochondrion [GO:0005739];nucleus [GO:0005634]	GO:0005634;GO:0005739;GO:0005741;GO:0005743;GO:0016020;GO:0016021;GO:0043065;GO:0070062;GO:0070585;GO:0097284;GO:1902108									+	+		+				+			+
21.9011	21.8754	21.4391	22.652	25.8198	25.8417	26.208	26.6699	3	28.9	28.6953	13	+	+	4.89014	4.16797	5.07595	P09105	P09105	Hemoglobin subunit theta-1	HBQ1	15.508				oxygen transport [GO:0015671]	heme binding [GO:0020037];iron ion binding [GO:0005506];oxygen binding [GO:0019825];oxygen transporter activity [GO:0005344]	hemoglobin complex [GO:0005833]	GO:0005344;GO:0005506;GO:0005833;GO:0015671;GO:0019825;GO:0020037																			+
22.8693	21.8478	21.1062	23.2055	26.0969	25.9601	25.8131	26.5875	5	18.3	28.6563	17	+	+	3.56292	3.85722	3.82399	Q7KZN9	Q7KZN9	Cytochrome c oxidase assembly protein COX15 homolog	COX15	46.03				cellular respiration [GO:0045333];heme a biosynthetic process [GO:0006784];heme biosynthetic process [GO:0006783];hydrogen ion transmembrane transport [GO:1902600];mitochondrial electron transport, cytochrome c to oxygen [GO:0006123];oxidation-reduction process [GO:0055114];respiratory chain complex IV assembly [GO:0008535];respiratory gaseous exchange [GO:0007585]	cytochrome-c oxidase activity [GO:0004129];oxidoreductase activity, acting on NAD(P)H, heme protein as acceptor [GO:0016653];oxidoreductase activity, acting on the CH-CH group of donors [GO:0016627]	cytochrome complex [GO:0070069];integral component of membrane [GO:0016021];mitochondrial inner membrane [GO:0005743];mitochondrial respiratory chain [GO:0005746];mitochondrion [GO:0005739]	GO:0004129;GO:0005739;GO:0005743;GO:0005746;GO:0006123;GO:0006783;GO:0006784;GO:0007585;GO:0008535;GO:0016021;GO:0016627;GO:0016653;GO:0045333;GO:0055114;GO:0070069;GO:1902600								+	+				+	+		+	+	+	+
21.5513	22.4776	22.2051	21.916	25.5323	25.4984	25.8497	25.4427	4	11.5	28.2428	17	+	+	5.4549	3.54325	4.93074	Q12907;D6RBV2;D6RIU4;D6RDX1	Q12907;D6RBV2;D6RIU4;D6RDX1	Vesicular integral-membrane protein VIP36	LMAN2	40.228				endoplasmic reticulum organization [GO:0007029];ER to Golgi vesicle-mediated transport [GO:0006888];Golgi organization [GO:0007030];positive regulation of phagocytosis [GO:0050766];protein transport [GO:0015031];retrograde vesicle-mediated transport, Golgi to ER [GO:0006890]	carbohydrate binding [GO:0030246];glycoprotein binding [GO:0001948];heat shock protein binding [GO:0031072];mannose binding [GO:0005537];metal ion binding [GO:0046872]	cell surface [GO:0009986];endoplasmic reticulum-Golgi intermediate compartment [GO:0005793];endoplasmic reticulum-Golgi intermediate compartment membrane [GO:0033116];endoplasmic reticulum membrane [GO:0005789];ER to Golgi transport vesicle [GO:0030134];extracellular exosome [GO:0070062];extracellular space [GO:0005615];Golgi apparatus [GO:0005794];Golgi membrane [GO:0000139];integral component o…	GO:0000139;GO:0001948;GO:0005537;GO:0005615;GO:0005789;GO:0005793;GO:0005794;GO:0005887;GO:0006888;GO:0006890;GO:0007029;GO:0007030;GO:0009986;GO:0015031;GO:0030134;GO:0030246;GO:0031072;GO:0033116;GO:0046872;GO:0050766;GO:0070062;GO:0016020;GO:0016020;GO:0016020																			+	+
22.0044	24.6587	24.4912	24.5972	27.3593	27.3714	27.9067	26.7712	9	16.3	30.0686	28	+	+	2.60101	3.41424	2.8792	A0A087WW65;O75027;B4DGL8	A0A087WW65;O75027;B4DGL8	ATP-binding cassette sub-family B member 7, mitochondrial	ABCB7	78.287				cellular iron ion homeostasis [GO:0006879];transmembrane transport [GO:0055085];transport [GO:0006810]	ATPase activity, coupled to transmembrane movement of substances [GO:0042626];ATP binding [GO:0005524];heme transporter activity [GO:0015232];ATPase activity, coupled to transmembrane movement of substances [GO:0042626];ATP binding [GO:0005524];ATPase activity, coupled to transmembrane movement of substances [GO:0042626];ATP binding [GO:0005524]	integral component of membrane [GO:0016021];mitochondrial inner membrane [GO:0005743];mitochondrion [GO:0005739];integral component of membrane [GO:0016021];mitochondrion [GO:0005739];integral component of membrane [GO:0016021]	GO:0005524;GO:0005739;GO:0005743;GO:0006810;GO:0006879;GO:0015232;GO:0016021;GO:0042626;GO:0055085;GO:0005524;GO:0005739;GO:0016021;GO:0042626;GO:0005524;GO:0016021;GO:0042626										+							+	+	+
22.7749	22.2024	21.6256	22.7112	25.3475	26.6384	25.7818	25.1697	3	21.9	28.7224	15	+	+	3.70893	3.40582	3.69129	E9PLD0;Q9H0U4;E7END7;Q92928;P62820;H0YLJ8;H0YL94;H0YMN7;H0YNE9;P61026;P51153;Q92930;P61006;P59190	E9PLD0;Q9H0U4;E7END7;Q92928;P62820	Ras-related protein Rab-1B;Putative Ras-related protein Rab-1C;Ras-related protein Rab-1A	RAB1B;RAB1A;RAB1C	18.483				antigen processing and presentation [GO:0019882];axonogenesis [GO:0007409];basolateral protein localization [GO:0061467];cellular response to insulin stimulus [GO:0032869];endoplasmic reticulum tubular network organization [GO:0071786];endosomal transport [GO:0016197];establishment of neuroblast polarity [GO:0045200];establishment of protein localization to endoplasmic reticulum membrane [GO:0097…	cadherin binding involved in cell-cell adhesion [GO:0098641];GDP binding [GO:0019003];GTPase activity [GO:0003924];GTP binding [GO:0005525];myosin V binding [GO:0031489];GTPase activity [GO:0003924];GTP binding [GO:0005525];GTP binding [GO:0005525];GDP binding [GO:0019003];GTPase activity [GO:0003924];GTP binding [GO:0005525];myosin V binding [GO:0031489];Rab GTPase binding [GO:0017137];GDP bindi…	cell-cell adherens junction [GO:0005913];cell-cell junction [GO:0005911];cilium [GO:0005929];cytoplasmic vesicle membrane [GO:0030659];endoplasmic reticulum membrane [GO:0005789];endoplasmic reticulum tubular network [GO:0071782];endosome [GO:0005768];extracellular exosome [GO:0070062];focal adhesion [GO:0005925];Golgi apparatus [GO:0005794];Golgi membrane [GO:0000139];insulin-responsive compartm…	GO:0000139;GO:0003924;GO:0005525;GO:0005768;GO:0005789;GO:0005794;GO:0005802;GO:0005911;GO:0005913;GO:0005925;GO:0005929;GO:0006893;GO:0007264;GO:0007409;GO:0016192;GO:0016197;GO:0019003;GO:0019882;GO:0030659;GO:0030670;GO:0030859;GO:0031489;GO:0032593;GO:0032869;GO:0043001;GO:0045200;GO:0055037;GO:0055038;GO:0061024;GO:0061467;GO:0070062;GO:0071782;GO:0071786;GO:0072659;GO:0090150;GO:0097051;GO:…							+					+		+					+	+
21.3893	21.3663	23.2342	20.6244	25.259	25.2463	24.9356	24.6064	4	17.8	27.5993	10	+	+	2.9463	3.35828	3.11793	Q99536;K7ERT7;K7ESA3;K7ENX2;K7EM19	Q99536;K7ERT7	Synaptic vesicle membrane protein VAT-1 homolog	VAT1	41.92		1.-.-.-		negative regulation of mitochondrial fusion [GO:0010637]	oxidoreductase activity [GO:0016491];zinc ion binding [GO:0008270];oxidoreductase activity [GO:0016491];zinc ion binding [GO:0008270];oxidoreductase activity [GO:0016491];zinc ion binding [GO:0008270];oxidoreductase activity [GO:0016491];zinc ion binding [GO:0008270];oxidoreductase activity [GO:0016491];zinc ion binding [GO:0008270]	extracellular exosome [GO:0070062];integral component of membrane [GO:0016021];mitochondrial outer membrane [GO:0005741]	GO:0005741;GO:0008270;GO:0010637;GO:0016021;GO:0016491;GO:0070062;GO:0008270;GO:0016491;GO:0008270;GO:0016491;GO:0008270;GO:0016491;GO:0008270;GO:0016491													+				+	+	+	+
21.7845	23.8497	24.4837	24.0201	26.1339	27.0996	26.4943	27.6694	8	15.1	29.6208	35	+	+	2.53236	3.31481	2.79145	E9PHI4;O94901;H0Y742;H0Y6N5;H7C2K3;H7C3X3;C9JK55	E9PHI4;O94901;H0Y742;H0Y6N5;H7C2K3	SUN domain-containing protein 1	SUN1	91.112				cytoskeletal anchoring at nuclear membrane [GO:0090286];nuclear envelope organization [GO:0006998];nuclear matrix anchoring at nuclear membrane [GO:0090292];ossification [GO:0001503];response to mechanical stimulus [GO:0009612];synapsis [GO:0007129]		acrosomal membrane [GO:0002080];integral component of nuclear inner membrane [GO:0005639];intracellular membrane-bounded organelle [GO:0043231];LINC complex [GO:0034993];nuclear envelope [GO:0005635];nuclear membrane [GO:0031965];integral component of membrane [GO:0016021];integral component of membrane [GO:0016021];intracellular membrane-bounded organelle [GO:0043231];nuclear membrane [GO:003196…	GO:0001503;GO:0002080;GO:0005635;GO:0005639;GO:0006998;GO:0007129;GO:0009612;GO:0031965;GO:0034993;GO:0043231;GO:0090286;GO:0090292;GO:0016021;GO:0016021;GO:0031965;GO:0043231;GO:0016021;GO:0016021;GO:0031965;GO:0043231												+							+
22.712	21.8172	22.1553	22.986	25.7245	25.873	25.8025	25.491	3	13.9	28.5334	14	+	+	4.67667	3.3051	4.25286	H3BN98;I3L3P7;I3L246;P62244;H3BV27;H3BT37;I3L303;H3BPJ2;Q15041	H3BN98;I3L3P7;I3L246;P62244	40S ribosomal protein S15a	RPS15A	27.168				apoptotic process [GO:0006915];cotranslational protein targeting to membrane [GO:0006613];endoplasmic reticulum tubular network assembly [GO:0071787];endoplasmic reticulum tubular network membrane organization [GO:1990809];negative regulation of apoptotic process [GO:0043066];negative regulation of cysteine-type endopeptidase activity involved in apoptotic process [GO:0043154];positive regulation…	identical protein binding [GO:0042802];poly(A) RNA binding [GO:0044822];RNA binding [GO:0003723];structural constituent of ribosome [GO:0003735];structural constituent of ribosome [GO:0003735];structural constituent of ribosome [GO:0003735];structural constituent of ribosome [GO:0003735];structural constituent of ribosome [GO:0003735];structural constituent of ribosome [GO:0003735];structural con…	cytosol [GO:0005829];endoplasmic reticulum membrane [GO:0005789];integral component of endoplasmic reticulum membrane [GO:0030176];integral component of membrane [GO:0016021];membrane [GO:0016020];Sec61 translocon complex [GO:0005784];cytoplasm [GO:0005737];cytosol [GO:0005829];cytosolic small ribosomal subunit [GO:0022627];extracellular exosome [GO:0070062];extracellular matrix [GO:0031012];memb…	GO:0002038;GO:0005784;GO:0005789;GO:0005829;GO:0006613;GO:0006915;GO:0016020;GO:0016021;GO:0030176;GO:0042802;GO:0043066;GO:0043154;GO:0071787;GO:1990809;GO:0000184;GO:0003723;GO:0003735;GO:0005654;GO:0005737;GO:0005739;GO:0005829;GO:0006364;GO:0006412;GO:0006413;GO:0006614;GO:0008284;GO:0009615;GO:0016020;GO:0019083;GO:0022627;GO:0031012;GO:0044822;GO:0045787;GO:0070062;GO:0003735;GO:0005840;GO:…							+								+				+
28.3111	28.3775	28.3127	28.1754	31.1984	31.5733	31.5329	31.7868	31	38.4	34.2336	165	+	+	6.57465	3.22865	5.13401	P16615;H7C5W9;O14983;Q93084;H3BVB2;A0A0C4DH86;J3QSY6;H3BTW4	P16615;H7C5W9	Sarcoplasmic/endoplasmic reticulum calcium ATPase 2	ATP2A2	114.76	CATALYTIC ACTIVITY: ATP + H(2)O + Ca(2+)(Side 1) = ADP + phosphate + Ca(2+)(Side 2).;CATALYTIC ACTIVITY: ATP + H(2)O + Ca(2+)(Side 1) = ADP + phosphate + Ca(2+)(Side 2).;CATALYTIC ACTIVITY: ATP + H(2)O + Ca(2+)(Side 1) = ADP + phosphate + Ca(2+)(Side 2).	3.6.3.8;3.6.3.8;3.6.3.8	ACT_SITE 351 351 4-aspartylphosphate intermediate. {ECO:0000250|UniProtKB:P04191}.;ACT_SITE 351 351 4-aspartylphosphate intermediate. {ECO:0000250|UniProtKB:P04191}.;ACT_SITE 351 351 4-aspartylphosphate intermediate. {ECO:0000250|UniProtKB:P04191}.	apoptotic mitochondrial changes [GO:0008637];calcium ion import [GO:0070509];calcium ion transport [GO:0006816];intrinsic apoptotic signaling pathway in response to endoplasmic reticulum stress [GO:0070059];ion transmembrane transport [GO:0034220];maintenance of mitochondrion location [GO:0051659];negative regulation of endoplasmic reticulum calcium ion concentration [GO:0032471];negative regulat…	ATP binding [GO:0005524];calcium ion binding [GO:0005509];calcium-transporting ATPase activity [GO:0005388];protein homodimerization activity [GO:0042803];ATP binding [GO:0005524];calcium ion binding [GO:0005509];calcium-transporting ATPase activity [GO:0005388];calcium-transporting ATPase activity involved in regulation of cardiac muscle cell membrane potential [GO:0086039];enzyme binding [GO:00…	calcium channel complex [GO:0034704];endoplasmic reticulum-Golgi intermediate compartment [GO:0005793];endoplasmic reticulum membrane [GO:0005789];H zone [GO:0031673];I band [GO:0031674];integral component of membrane [GO:0016021];integral component of plasma membrane [GO:0005887];membrane [GO:0016020];mitochondrion [GO:0005739];perinuclear region of cytoplasm [GO:0048471];platelet dense tubular …	GO:0005388;GO:0005509;GO:0005524;GO:0005739;GO:0005789;GO:0005793;GO:0005887;GO:0006816;GO:0006942;GO:0008637;GO:0016020;GO:0016021;GO:0016529;GO:0031095;GO:0031448;GO:0031673;GO:0031674;GO:0032470;GO:0032471;GO:0033017;GO:0034220;GO:0034704;GO:0034976;GO:0042803;GO:0045988;GO:0048471;GO:0051561;GO:0051659;GO:0070059;GO:0070509;GO:0090076;GO:1903779;GO:0002026;GO:0005388;GO:0005509;GO:0005524;GO:…										+		+					+	+	+
22.8366	21.7093	23.1778	21.7561	25.0486	26.1201	25.1924	25.7723	4	13.7	28.1778	12	+	+	3.38017	3.16342	3.3279	H0Y8C3;Q9NZJ7	H0Y8C3;Q9NZJ7	Mitochondrial carrier homolog 1	MTCH1	43.121				activation of cysteine-type endopeptidase activity involved in apoptotic process [GO:0006919];apoptotic process [GO:0006915];neuronal ion channel clustering [GO:0045161];positive regulation of apoptotic process [GO:0043065];regulation of signal transduction [GO:0009966];transport [GO:0006810];transport [GO:0006810]		integral component of membrane [GO:0016021];intracellular [GO:0005622];membrane [GO:0016020];mitochondrial inner membrane [GO:0005743];mitochondrion [GO:0005739];integral component of membrane [GO:0016021]	GO:0005622;GO:0005739;GO:0005743;GO:0006810;GO:0006915;GO:0006919;GO:0009966;GO:0016020;GO:0016021;GO:0043065;GO:0045161;GO:0006810;GO:0016021												+							+
22.1341	23.163	21.9825	24.8363	25.6989	26.4456	26.2867	26.1784	5	21.7	28.8707	14	+	+	2.4407	3.12343	2.65499	F5GY37;J3KPX7;Q99623;F5H3X6;F5GWA7;F5H0C5	F5GY37;J3KPX7;Q99623;F5H3X6;F5GWA7	Prohibitin-2	PHB2	29.723				mammary gland alveolus development [GO:0060749];mammary gland branching involved in thelarche [GO:0060744];mitochondrion organization [GO:0007005];negative regulation of apoptotic process [GO:0043066];negative regulation of intracellular estrogen receptor signaling pathway [GO:0033147];negative regulation of mammary gland epithelial cell proliferation [GO:0033600];negative regulation of sequence-…	amide binding [GO:0033218];estrogen receptor binding [GO:0030331];protein C-terminus binding [GO:0008022];protein N-terminus binding [GO:0047485]	cell periphery [GO:0071944];cell surface [GO:0009986];cytoplasm [GO:0005737];extracellular exosome [GO:0070062];mitochondrial inner membrane [GO:0005743];mitochondrial outer membrane [GO:0005741];mitochondrion [GO:0005739];nuclear matrix [GO:0016363];nucleus [GO:0005634];protein complex [GO:0043234];membrane [GO:0016020];membrane [GO:0016020];membrane [GO:0016020];membrane [GO:0016020];membrane […	GO:0000060;GO:0005634;GO:0005737;GO:0005739;GO:0005741;GO:0005743;GO:0006351;GO:0007005;GO:0007062;GO:0008022;GO:0009986;GO:0016363;GO:0030331;GO:0031536;GO:0033147;GO:0033218;GO:0033600;GO:0043066;GO:0043234;GO:0043433;GO:0045892;GO:0047485;GO:0050821;GO:0051091;GO:0060744;GO:0060749;GO:0060762;GO:0070062;GO:0070374;GO:0071944;GO:1902808;GO:0016020;GO:0016020;GO:0016020;GO:0016020;GO:0016020															+				+
25.3936	25.0683	25.0753	25.7441	28.0146	28.3048	28.4065	28.9583	15	30.7	31.1956	58	+	+	4.73242	3.10072	4.11067	Q9BTX1	Q9BTX1	Nucleoporin NDC1	NDC1	76.304				gene silencing by RNA [GO:0031047];intracellular transport of virus [GO:0075733];mitotic nuclear envelope disassembly [GO:0007077];mRNA export from nucleus [GO:0006406];nuclear pore complex assembly [GO:0051292];nuclear pore distribution [GO:0031081];protein sumoylation [GO:0016925];protein transport [GO:0015031];regulation of cellular response to heat [GO:1900034];regulation of glucose transport…	structural constituent of nuclear pore [GO:0017056]	actin cytoskeleton [GO:0015629];cytoplasm [GO:0005737];integral component of membrane [GO:0016021];membrane [GO:0016020];nuclear envelope [GO:0005635];nuclear membrane [GO:0031965];nuclear pore [GO:0005643];nuclear pore transmembrane ring [GO:0070762];plasma membrane [GO:0005886]	GO:0005635;GO:0005643;GO:0005737;GO:0005886;GO:0006406;GO:0006409;GO:0007077;GO:0007129;GO:0007283;GO:0010827;GO:0015031;GO:0015629;GO:0016020;GO:0016021;GO:0016032;GO:0016925;GO:0017056;GO:0019083;GO:0031047;GO:0031081;GO:0031965;GO:0051292;GO:0070762;GO:0075733;GO:1900034												+		+					+
22.6768	22.0698	21.621	21.4244	24.9211	24.8036	25.2071	25.1913	4	15.9	27.6158	7	+	+	4.34257	3.08273	3.87543	I3L1P8;Q02978	I3L1P8;Q02978	Mitochondrial 2-oxoglutarate/malate carrier protein	SLC25A11	32.182				gluconeogenesis [GO:0006094];glucose metabolic process [GO:0006006];transport [GO:0006810];transport [GO:0006810]	oxoglutarate:malate antiporter activity [GO:0015367];poly(A) RNA binding [GO:0044822]	integral component of plasma membrane [GO:0005887];mitochondrial inner membrane [GO:0005743];mitochondrion [GO:0005739];nucleus [GO:0005634];integral component of membrane [GO:0016021]	GO:0005634;GO:0005739;GO:0005743;GO:0005887;GO:0006006;GO:0006094;GO:0006810;GO:0015367;GO:0044822;GO:0006810;GO:0016021																+	+	+	+
21.6419	22.823	22.4935	21.927	25.7585	25.3598	25.1376	24.954	7	23.2	27.8901	22	+	+	4.15413	3.08109	3.76369	O94919	O94919	Endonuclease domain-containing 1 protein	ENDOD1	55.016		3.1.30.-			endonuclease activity [GO:0004519];metal ion binding [GO:0046872];nucleic acid binding [GO:0003676]	extracellular exosome [GO:0070062];membrane [GO:0016020]	GO:0003676;GO:0004519;GO:0016020;GO:0046872;GO:0070062																			+	+
21.9438	22.6841	23.4527	22.7584	25.5714	25.9677	25.6906	25.7294	7	11.1	28.3628	20	+	+	4.10671	3.03002	3.69768	A0A075B7F8;A8CG34;A0A087WY75;C9JFL1	A0A075B7F8;A8CG34;A0A087WY75	Nuclear envelope pore membrane protein POM 121C	POM121C	125.09				gene silencing by RNA [GO:0031047];intracellular transport of virus [GO:0075733];mitotic nuclear envelope disassembly [GO:0007077];mRNA export from nucleus [GO:0006406];protein import into nucleus [GO:0006606];protein sumoylation [GO:0016925];regulation of cellular response to heat [GO:1900034];regulation of glucose transport [GO:0010827];RNA export from nucleus [GO:0006405];tRNA export from nucl…	nuclear localization sequence binding [GO:0008139];nucleocytoplasmic transporter activity [GO:0005487];structural constituent of nuclear pore [GO:0017056]	endoplasmic reticulum membrane [GO:0005789];integral component of membrane [GO:0016021];nuclear envelope [GO:0005635];nuclear membrane [GO:0031965];nuclear pore [GO:0005643];integral component of membrane [GO:0016021]	GO:0005487;GO:0005635;GO:0005643;GO:0005789;GO:0006405;GO:0006406;GO:0006409;GO:0006606;GO:0007077;GO:0008139;GO:0010827;GO:0016021;GO:0016032;GO:0016925;GO:0017056;GO:0019083;GO:0031047;GO:0031965;GO:0075733;GO:1900034;GO:0016021												+			+				+
20.8994	22.023	22.2166	23.0582	24.8668	24.9592	24.3859	25.7788	3	12.8	27.5983	8	+	+	2.84465	2.94835	2.86225	C9J3L8;C9J5W0;E9PAL7;C9IZQ1;P43307	C9J3L8;C9J5W0;E9PAL7;C9IZQ1;P43307	Translocon-associated protein subunit alpha	SSR1	29.573				cotranslational protein targeting to membrane [GO:0006613];IRE1-mediated unfolded protein response [GO:0036498];positive regulation of cell proliferation [GO:0008284]		endoplasmic reticulum [GO:0005783];endoplasmic reticulum membrane [GO:0005789];integral component of membrane [GO:0016021];endoplasmic reticulum [GO:0005783];endoplasmic reticulum membrane [GO:0005789];integral component of membrane [GO:0016021];endoplasmic reticulum membrane [GO:0005789];integral component of membrane [GO:0016021];endoplasmic reticulum [GO:0005783];endoplasmic reticulum membrane…	GO:0005783;GO:0005789;GO:0006613;GO:0008284;GO:0016021;GO:0036498;GO:0005783;GO:0005789;GO:0016021;GO:0005789;GO:0016021;GO:0005783;GO:0005789;GO:0016021;GO:0005789;GO:0016021															+				+
23.034	21.2105	22.7635	22.5021	25.2313	25.1186	24.9506	25.8877	7	12.4	28.3543	10	+	+	3.18007	2.91952	3.06351	Q9P2I0;H0YJF4	Q9P2I0	Cleavage and polyadenylation specificity factor subunit 2	CPSF2	88.486				mRNA 3'-end processing [GO:0031124];mRNA 3'-end processing by stem-loop binding and cleavage [GO:0006398];mRNA cleavage [GO:0006379];mRNA export from nucleus [GO:0006406];mRNA polyadenylation [GO:0006378];mRNA splicing, via spliceosome [GO:0000398];termination of RNA polymerase II transcription [GO:0006369];mRNA cleavage [GO:0006379];mRNA polyadenylation [GO:0006378]	RNA binding [GO:0003723]	membrane [GO:0016020];mRNA cleavage and polyadenylation specificity factor complex [GO:0005847];nucleoplasm [GO:0005654];mRNA cleavage and polyadenylation specificity factor complex [GO:0005847]	GO:0000398;GO:0003723;GO:0005654;GO:0005847;GO:0006369;GO:0006378;GO:0006379;GO:0006398;GO:0006406;GO:0016020;GO:0031124;GO:0005847;GO:0006378;GO:0006379																			+
22.2234	23.1032	22.9867	21.9034	25.415	25.336	25.2778	25.7725	6	2.4	28.0178	11	+	+	4.0523	2.89619	3.56605	Q14789;C9JGI8;C9J4Q3;B8ZZG1;REV__Q8N884;E7EU81;Q9NZW5	Q14789	Golgin subfamily B member 1	GOLGB1	376.01				ER to Golgi vesicle-mediated transport [GO:0006888];Golgi organization [GO:0007030];protein complex assembly [GO:0006461]	poly(A) RNA binding [GO:0044822];sequence-specific DNA binding [GO:0043565];transcription factor activity, sequence-specific DNA binding [GO:0003700]	cis-Golgi network [GO:0005801];endoplasmic reticulum-Golgi intermediate compartment [GO:0005793];Golgi apparatus [GO:0005794];Golgi membrane [GO:0000139];Golgi stack [GO:0005795];integral component of membrane [GO:0016021];membrane [GO:0016020];extracellular exosome [GO:0070062];membrane [GO:0016020];plasma membrane [GO:0005886];Golgi apparatus [GO:0005794]	GO:0000139;GO:0003700;GO:0005793;GO:0005794;GO:0005795;GO:0005801;GO:0006888;GO:0007030;GO:0016020;GO:0016021;GO:0043565;GO:0044822;GO:0005886;GO:0006461;GO:0016020;GO:0070062;GO:0005794																			+	+
22.2179	21.5294	22.5699	22.1606	24.8624	24.6836	25.2174	25.2094	6	23.2	27.5722	17	+	+	4.54758	2.87377	3.81287	Q96K37;H7C1I0;C9JK45	Q96K37;H7C1I0	Solute carrier family 35 member E1	SLC35E1	44.772				carbohydrate transmembrane transport [GO:0034219]		integral component of membrane [GO:0016021];integral component of membrane [GO:0016021];integral component of membrane [GO:0016021]	GO:0016021;GO:0034219;GO:0016021;GO:0016021																			+
22.4461	21.5718	21.9717	22.7022	24.8005	25.0858	24.7481	25.4765	4	15.8	27.7063	13	+	+	4.10189	2.85479	3.56157	Q9H9B4;D6RDG7;S4R2X2;D6RFI0;D6RAE9	Q9H9B4;D6RDG7;S4R2X2;D6RFI0;D6RAE9	Sideroflexin-1	SFXN1	35.619				erythrocyte differentiation [GO:0030218];iron ion homeostasis [GO:0055072];iron ion transport [GO:0006826]	ion transmembrane transporter activity [GO:0015075];ion transmembrane transporter activity [GO:0015075];ion transmembrane transporter activity [GO:0015075];ion transmembrane transporter activity [GO:0015075];ion transmembrane transporter activity [GO:0015075]	integral component of membrane [GO:0016021];mitochondrial inner membrane [GO:0005743];mitochondrion [GO:0005739];membrane [GO:0016020];mitochondrion [GO:0005739];membrane [GO:0016020];mitochondrion [GO:0005739];membrane [GO:0016020];membrane [GO:0016020];mitochondrion [GO:0005739]	GO:0005739;GO:0005743;GO:0006826;GO:0015075;GO:0016021;GO:0030218;GO:0055072;GO:0005739;GO:0015075;GO:0016020;GO:0005739;GO:0015075;GO:0016020;GO:0015075;GO:0016020;GO:0005739;GO:0015075;GO:0016020										+							+	+	+
22.7816	21.3005	21.9566	21.9041	25.269	24.5744	24.7248	24.7317	3	57.4	27.3839	7	+	+	3.79365	2.83926	3.37917	C9JJT5;G3V325;C9JU26;P56134	C9JJT5;G3V325;C9JU26;P56134	ATP synthase subunit f, mitochondrial	ATP5J2-PTCD1;ATP5J2	5.9149				ATP biosynthetic process [GO:0006754];mitochondrial ATP synthesis coupled proton transport [GO:0042776];proton transport [GO:0015992]	transmembrane transporter activity [GO:0022857]	extracellular exosome [GO:0070062];integral component of membrane [GO:0016021];mitochondrial inner membrane [GO:0005743];mitochondrial proton-transporting ATP synthase complex [GO:0005753];mitochondrial proton-transporting ATP synthase complex, coupling factor F(o) [GO:0000276];nucleus [GO:0005634];integral component of membrane [GO:0016021]	GO:0000276;GO:0005634;GO:0005743;GO:0005753;GO:0006754;GO:0015992;GO:0016021;GO:0022857;GO:0042776;GO:0070062;GO:0016021																+	+	+	+
22.2817	22.2665	23.2893	21.8564	24.3547	25.7251	24.8184	25.5918	4	14.4	27.8736	9	+	+	3.0379	2.69904	2.85468	Q9HC21;J3KSB1;J3KSI7;J3QL84;J3KS44;J3QLV3;J3KRY6	Q9HC21	Mitochondrial thiamine pyrophosphate carrier	SLC25A19	35.511				deoxynucleotide transport [GO:0030302];transport [GO:0006810];transport [GO:0006810];transport [GO:0006810];transport [GO:0006810];transport [GO:0006810];transport [GO:0006810]	deoxynucleotide transmembrane transporter activity [GO:0030233]	integral component of membrane [GO:0016021];mitochondrial inner membrane [GO:0005743];nucleus [GO:0005634];integral component of membrane [GO:0016021];integral component of membrane [GO:0016021];integral component of membrane [GO:0016021];integral component of membrane [GO:0016021];integral component of membrane [GO:0016021];integral component of membrane [GO:0016021]	GO:0005634;GO:0005743;GO:0016021;GO:0030233;GO:0030302;GO:0006810;GO:0016021;GO:0006810;GO:0016021;GO:0006810;GO:0016021;GO:0006810;GO:0016021;GO:0006810;GO:0016021;GO:0006810;GO:0016021																+	+	+	+
25.3166	24.0931	25.0541	25.5647	27.6992	27.6755	27.6921	27.6812	12	32.1	30.4049	41	+	+	3.78669	2.67987	3.25999	O75874;C9J4N6;C9JJE5;C9JLU6	O75874;C9J4N6	Isocitrate dehydrogenase [NADP] cytoplasmic	IDH1	46.659	CATALYTIC ACTIVITY: Isocitrate + NADP(+) = 2-oxoglutarate + CO(2) + NADPH. {ECO:0000269|PubMed:19935646}.	1.1.1.42		2-oxoglutarate metabolic process [GO:0006103];female gonad development [GO:0008585];glutathione metabolic process [GO:0006749];glyoxylate cycle [GO:0006097];isocitrate metabolic process [GO:0006102];NADPH regeneration [GO:0006740];regulation of phospholipid biosynthetic process [GO:0071071];regulation of phospholipid catabolic process [GO:0060696];response to oxidative stress [GO:0006979];respons…	(R)-2-hydroxyglutarate dehydrogenase activity [GO:0051990];cadherin binding involved in cell-cell adhesion [GO:0098641];isocitrate dehydrogenase (NADP+) activity [GO:0004450];magnesium ion binding [GO:0000287];NAD binding [GO:0051287];NADP binding [GO:0050661];protein homodimerization activity [GO:0042803];receptor binding [GO:0005102];isocitrate dehydrogenase (NADP+) activity [GO:0004450];isocit…	cell-cell adherens junction [GO:0005913];cytoplasm [GO:0005737];cytosol [GO:0005829];extracellular exosome [GO:0070062];mitochondrion [GO:0005739];peroxisomal matrix [GO:0005782];peroxisome [GO:0005777]	GO:0000287;GO:0004450;GO:0005102;GO:0005737;GO:0005739;GO:0005777;GO:0005782;GO:0005829;GO:0005913;GO:0006097;GO:0006099;GO:0006102;GO:0006103;GO:0006740;GO:0006749;GO:0006979;GO:0008585;GO:0042803;GO:0048545;GO:0050661;GO:0051287;GO:0051990;GO:0060696;GO:0070062;GO:0071071;GO:0098641;GO:0004450;GO:0006102;GO:0004450;GO:0006102;GO:0004450;GO:0006102								+	+				+			+			+	+
23.1649	22.5273	21.864	22.4435	24.9512	25.5125	25.1358	25.1118	4	11	27.8222	13	+	+	4.02755	2.6779	3.3831	A0A0C4DFM1;Q92544	A0A0C4DFM1;Q92544	Transmembrane 9 superfamily member 4	TM9SF4	72.54				cell adhesion [GO:0007155];phagocytosis [GO:0006909];positive regulation of protein exit from endoplasmic reticulum [GO:0070863];positive regulation of protein localization to cell surface [GO:2000010];regulation of intracellular pH [GO:0051453];response to hypoxia [GO:0001666];vacuolar proton-transporting V-type ATPase complex assembly [GO:0070072]		early endosome [GO:0005769];Golgi apparatus [GO:0005794];integral component of membrane [GO:0016021];integral component of membrane [GO:0016021]	GO:0001666;GO:0005769;GO:0005794;GO:0006909;GO:0007155;GO:0016021;GO:0051453;GO:0070072;GO:0070863;GO:2000010;GO:0016021										+				+					+	+
23.0067	21.9417	21.4116	21.0769	24.3895	24.2286	24.8291	24.6918	3	16.2	27.0374	7	+	+	3.02737	2.67554	2.83533	Q9BVK6	Q9BVK6	Transmembrane emp24 domain-containing protein 9	TMED9	27.277				COPI coating of Golgi vesicle [GO:0048205];ER to Golgi vesicle-mediated transport [GO:0006888];Golgi organization [GO:0007030];positive regulation of organelle organization [GO:0010638];protein transport [GO:0015031];retrograde vesicle-mediated transport, Golgi to ER [GO:0006890]	syntaxin binding [GO:0019905]	endoplasmic reticulum [GO:0005783];endoplasmic reticulum-Golgi intermediate compartment [GO:0005793];endoplasmic reticulum-Golgi intermediate compartment membrane [GO:0033116];endoplasmic reticulum membrane [GO:0005789];extracellular exosome [GO:0070062];Golgi apparatus [GO:0005794];Golgi membrane [GO:0000139];integral component of membrane [GO:0016021];trans-Golgi network transport vesicle [GO:0…	GO:0000139;GO:0005783;GO:0005789;GO:0005793;GO:0005794;GO:0006888;GO:0006890;GO:0007030;GO:0010638;GO:0015031;GO:0016021;GO:0019905;GO:0030133;GO:0030140;GO:0033116;GO:0048205;GO:0070062												+							+	+
22.1837	23.2772	22.1828	22.0016	24.6388	24.9262	25.3047	24.9816	4	12.3	27.5075	8	+	+	3.66754	2.55147	3.10351	Q658P3;B8ZZX6	Q658P3;B8ZZX6	Metalloreductase STEAP3	STEAP3	54.6		1.16.1.-		apoptotic process [GO:0006915];cell cycle [GO:0007049];copper ion import [GO:0015677];ferric iron import into cell [GO:0097461];iron ion homeostasis [GO:0055072];protein secretion [GO:0009306];regulation of apoptotic process [GO:0042981];transferrin transport [GO:0033572]	cupric reductase activity [GO:0008823];ferric-chelate reductase (NADPH) activity [GO:0052851];metal ion binding [GO:0046872];oxidoreductase activity, oxidizing metal ions, NAD or NADP as acceptor [GO:0016723]	cytoplasm [GO:0005737];endosome membrane [GO:0010008];integral component of plasma membrane [GO:0005887];multivesicular body [GO:0005771];integral component of membrane [GO:0016021]	GO:0005737;GO:0005771;GO:0005887;GO:0006915;GO:0007049;GO:0008823;GO:0009306;GO:0010008;GO:0015677;GO:0016723;GO:0033572;GO:0042981;GO:0046872;GO:0052851;GO:0055072;GO:0097461;GO:0016021										+			+						+
22.0617	21.7708	22.11	21.9843	24.4681	23.9936	24.4518	24.2001	3	5.4	26.8212	8	+	+	5.56747	2.29671	3.61348	Q9NRK6	Q9NRK6	ATP-binding cassette sub-family B member 10, mitochondrial	ABCB10	79.147				transmembrane transport [GO:0055085];transport [GO:0006810]	ATPase activity, coupled to transmembrane movement of substances [GO:0042626];ATP binding [GO:0005524];transporter activity [GO:0005215]	integral component of mitochondrial membrane [GO:0032592];mitochondrial inner membrane [GO:0005743]	GO:0005215;GO:0005524;GO:0005743;GO:0006810;GO:0032592;GO:0042626;GO:0055085																	+	+	+
22.0767	21.5167	22.8073	22.5226	24.1364	24.1829	24.5862	24.8088	6	10.7	26.9444	15	+	+	3.29317	2.19776	2.66445	Q92543;E9PLV3	Q92543	Sorting nexin-19	SNX19	108.6				chondrocyte differentiation [GO:0002062];dense core granule maturation [GO:1990502];exocytosis [GO:0006887];insulin secretion [GO:0030073]	phosphatidylinositol-3-phosphate binding [GO:0032266];phosphatidylinositol binding [GO:0035091]	cytoplasm [GO:0005737];cytoplasmic vesicle membrane [GO:0030659];early endosome membrane [GO:0031901]	GO:0002062;GO:0005737;GO:0006887;GO:0030073;GO:0030659;GO:0031901;GO:0032266;GO:1990502;GO:0035091																			+	+
22.1421	22.1038	22.5675	21.5547	23.7984	24.1448	24.9332	23.9084	6	19.4	26.7966	7	+	+	3.15741	2.10417	2.53607	Q9NXH8	Q9NXH8	Torsin-4A	TOR4A	46.914					ATP binding [GO:0005524]	integral component of membrane [GO:0016021]	GO:0005524;GO:0016021																			+	+
21.9114	22.3927	22.4362	22.6206	24.2857	24.436	24.1726	24.8699	3	8.4	27.7398	9	+	+	4.18008	2.10085	2.9383	A0A0C4DGS1;P39656;U3KQ84	A0A0C4DGS1;P39656;U3KQ84	Dolichyl-diphosphooligosaccharide--protein glycosyltransferase 48 kDa subunit	DDOST	48.799	CATALYTIC ACTIVITY: Dolichyl diphosphooligosaccharide + [protein]-L-asparagine = dolichyl diphosphate + a glycoprotein with the oligosaccharide chain attached by N-beta-D-glycosyl linkage to a protein L-asparagine.;CATALYTIC ACTIVITY: Dolichyl diphosphooligosaccharide + [protein]-L-asparagine = dolichyl diphosphate + a glycoprotein with the oligosaccharide chain attached by N-beta-D-glycosyl link…	2.4.99.18;2.4.99.18;2.4.99.18		protein glycosylation [GO:0006486];protein N-linked glycosylation [GO:0006487];protein N-linked glycosylation via asparagine [GO:0018279];response to cytokine [GO:0034097];T cell activation [GO:0042110];protein N-linked glycosylation via asparagine [GO:0018279];protein N-linked glycosylation via asparagine [GO:0018279]	transferase activity, transferring glycosyl groups [GO:0016757];transferase activity, transferring glycosyl groups [GO:0016757];transferase activity, transferring glycosyl groups [GO:0016757]	endoplasmic reticulum [GO:0005783];endoplasmic reticulum membrane [GO:0005789];integral component of membrane [GO:0016021];intracellular membrane-bounded organelle [GO:0043231];membrane [GO:0016020];oligosaccharyltransferase complex [GO:0008250];protein complex [GO:0043234];endoplasmic reticulum membrane [GO:0005789];integral component of membrane [GO:0016021];endoplasmic reticulum membrane [GO:0…	GO:0005783;GO:0005789;GO:0006486;GO:0006487;GO:0008250;GO:0016020;GO:0016021;GO:0016757;GO:0018279;GO:0034097;GO:0042110;GO:0043231;GO:0043234;GO:0005789;GO:0016021;GO:0016757;GO:0018279;GO:0005789;GO:0016021;GO:0016757;GO:0018279																			+	+
23.3627	22.0113	22.6793	22.5944	24.2162	24.8427	24.7075	25.1641	6	8.3	27.4161	15	+	+	3.05171	2.07071	2.46597	A0A024RCR6;A0A0G2JK23;P46379;A0A0G2JL47;F6S6P2;X6REW1;A0A0G2JJM1;F6TC96;F6UR09;F6U1F2;F6XTU0;A0A0G2JJR8;A0A1B0GX79;F6WML8;F6VEM6;F6X9W3;F6U341;H0Y710	A0A024RCR6;A0A0G2JK23;P46379;A0A0G2JL47;F6S6P2;X6REW1;A0A0G2JJM1	Large proline-rich protein BAG6	BAT3;BAG6	118.7				brain development [GO:0007420];cell differentiation [GO:0030154];covalent chromatin modification [GO:0016569];embryo development [GO:0009790];immune system process [GO:0002376];internal peptidyl-lysine acetylation [GO:0018393];intrinsic apoptotic signaling pathway in response to DNA damage by p53 class mediator [GO:0042771];intrinsic apoptotic signaling pathway in response to endoplasmic reticulu…	misfolded protein binding [GO:0051787];polyubiquitin binding [GO:0031593];proteasome binding [GO:0070628];ribosome binding [GO:0043022];ubiquitin protein ligase binding [GO:0031625];ubiquitin-specific protease binding [GO:1990381]	BAT3 complex [GO:0071818];cytoplasm [GO:0005737];cytosol [GO:0005829];intracellular membrane-bounded organelle [GO:0043231];membrane [GO:0016020];nucleoplasm [GO:0005654];nucleus [GO:0005634]	GO:0001822;GO:0002376;GO:0005634;GO:0005654;GO:0005737;GO:0005829;GO:0006511;GO:0006810;GO:0007130;GO:0007283;GO:0007420;GO:0009790;GO:0016020;GO:0016569;GO:0018393;GO:0030154;GO:0030324;GO:0031593;GO:0031625;GO:0032435;GO:0042127;GO:0042771;GO:0043022;GO:0043066;GO:0043231;GO:0045861;GO:0050821;GO:0051787;GO:0070059;GO:0070628;GO:0071816;GO:0071818;GO:1904294;GO:1904378;GO:1904379;GO:1990381							+					+							+
22.859	21.9676	23.09	21.3127	24.5509	23.6733	24.6806	24.4817	3	6	27.3578	13	+	+	2.31307	2.03926	2.10313	P08240	P08240	Signal recognition particle receptor subunit alpha	SRPR	69.81				cotranslational protein targeting to membrane [GO:0006613];IRE1-mediated unfolded protein response [GO:0036498];SRP-dependent cotranslational protein targeting to membrane [GO:0006614]	GTPase activity [GO:0003924];GTP binding [GO:0005525];poly(A) RNA binding [GO:0044822];signal recognition particle binding [GO:0005047]	endoplasmic reticulum [GO:0005783];endoplasmic reticulum membrane [GO:0005789];extracellular exosome [GO:0070062];integral component of membrane [GO:0016021];membrane [GO:0016020];signal recognition particle receptor complex [GO:0005785]	GO:0003924;GO:0005047;GO:0005525;GO:0005783;GO:0005785;GO:0005789;GO:0006613;GO:0006614;GO:0016020;GO:0016021;GO:0036498;GO:0044822;GO:0070062															+				+
22.2682	22.5639	22.5767	21.5613	27.6688	26.6465	26.5812	27.117	5	10.4	29.5744	20	+	+	5.03413	4.76085	5.62404	P03915	P03915	NADH-ubiquinone oxidoreductase chain 5	MT-ND5	67.026	CATALYTIC ACTIVITY: NADH + ubiquinone + 5 H(+)(In) = NAD(+) + ubiquinol + 4 H(+)(Out).	1.6.5.3		mitochondrial electron transport, NADH to ubiquinone [GO:0006120];mitochondrial respiratory chain complex I assembly [GO:0032981];response to hydrogen peroxide [GO:0042542];response to hypoxia [GO:0001666];response to organonitrogen compound [GO:0010243]	NADH dehydrogenase (ubiquinone) activity [GO:0008137]	integral component of membrane [GO:0016021];mitochondrial inner membrane [GO:0005743];mitochondrial respiratory chain complex I [GO:0005747];neuron projection [GO:0043005]	GO:0001666;GO:0005743;GO:0005747;GO:0006120;GO:0008137;GO:0010243;GO:0016021;GO:0032981;GO:0042542;GO:0043005									+				+	+		+
25.0143	25.1937	24.6075	24.4833	30.6461	30.8448	30.6876	30.4749	14	24.7	33.2832	100	+	+	7.19003	5.83865	8.53922	Q9NQC3	Q9NQC3	Reticulon-4	RTN4	129.93				apoptotic process [GO:0006915];axonal fasciculation [GO:0007413];cardiac epithelial to mesenchymal transition [GO:0060317];cerebral cortex radial glia guided migration [GO:0021801];endoplasmic reticulum tubular network assembly [GO:0071787];endoplasmic reticulum tubular network organization [GO:0071786];negative regulation of axon extension [GO:0030517];negative regulation of axonogenesis [GO:005…	cadherin binding involved in cell-cell adhesion [GO:0098641];poly(A) RNA binding [GO:0044822]	cell-cell adherens junction [GO:0005913];cell projection [GO:0042995];endoplasmic reticulum [GO:0005783];endoplasmic reticulum membrane [GO:0005789];extracellular exosome [GO:0070062];integral component of endoplasmic reticulum membrane [GO:0030176];intracellular [GO:0005622];nuclear envelope [GO:0005635];plasma membrane [GO:0005886];postsynaptic density [GO:0014069]	GO:0005622;GO:0005635;GO:0005783;GO:0005789;GO:0005886;GO:0005913;GO:0006915;GO:0007413;GO:0014069;GO:0021801;GO:0030176;GO:0030308;GO:0030334;GO:0030517;GO:0042981;GO:0042995;GO:0044822;GO:0050771;GO:0051292;GO:0060317;GO:0070062;GO:0071786;GO:0071787;GO:0098641;GO:2000172														+
[truncated: 86 more rows]
