# Supplementary material for: Quantitative chemoproteomic profiling reveals multiple target interactions of spongiolactone derivatives in leukemia cells
Source: Royal Society of Chemistry journal article supplement (doi:10.1039/c7cc04990k), 2017-01-01
Supplement: c7cc04990k4.xlsx [file c7cc04990k4.xlsx]

## Sheet: Key
Supplementary Table S3	Chemical proteomics with probe (±)-4 in Jurkat cells and comparison with probe (+)-3 in Jurkat cells. Identification of proteins following labelling with 3 or 4, CuAAC, pull-down, tryptic digest and LC-MS/MS analysis.
Abbreviations	NaN = not a number (not quantified in proteomics); LFQ = label-free quantification using MaxQuant (log2 intensity)
Definitions	T-test enrichment X/Y = Log2(Mean LFQ sample X/Mean LFQ sample Y)
Experimental design	Experiments A, B, C are independent biological replicates: cells were labelled and harvested in separate experiments on different days. Sample lysis and downstream processing was performed together.
Contained in this spreadsheet:
T-test probe 4 in Jurkat cells	Filtering	Data were filtered to first retain only proteins with at least 2 razor+unique peptides in at all three replicates of either 4 or DMSO treated samples, and quantified in at least 3/3 biological replicates.
	Missing values imputation and t-test	Missing values were imputed from a normal distribution (width 0.3, downshift 1.8, across total dataset) and a two-sample t-test performed to compare DMSO and 4-treated samples: two sided, permutation-corrected (250 permutations), FDR 0.01, s0 1
Comparison probes 3 & 4	Note that for data in this tab label-free quantification was performed across 3 and 4 datasets together.	Data were filtered to first retain only proteins with at least 1 razor+unique peptides and quantified in at least 2/3 biological replicates for DMSO, probe 3 or probe 4. Missing values were imputed from a normal distribution (width 0.3, downshift 1.8, separately each column) and a two-sample t-test performed to compare DMSO and probe-treated samples: two sided, permutation-corrected (250 permutat…
	GO (gene ontology) annotation data was imported from Uniprot
GO enrichment analysis probe 4	Performed on 57 hits using BINGO plugin in Cytoscape

## Sheet: Ttest 4 in Jurkat
LFQ intensities (Log2)						Global data				T-test 4 vs DMSO				Protein information
DMSO_A	DMSO_B	DMSO_C	probe3_A	probe3_B	probe_C	Razor + unique peptides	Sequence coverage [%]	Intensity	MS/MS count	Significant	Significant & Log2(enrichment) >2	-Log10 (p-value)	Difference	Protein IDs	Majority protein IDs	Protein names	Gene names
20.7415	20.562	20.297	28.1691	26.6935	28.1867	12	48.9	30.2223	36	+	+	3.81864	7.14963	Q86X76	Q86X76	Nitrilase homolog 1	NIT1
20.9491	21.2583	21.7729	28.621	27.3682	28.1846	11	54.7	30.7864	42	+	+	3.97744	6.73117	Q9NQR4;H7C579;F8WF70	Q9NQR4;H7C579	Omega-amidase NIT2	NIT2
20.97	21.4432	21.06	28.3697	27.2305	27.7154	13	29.4	30.3866	30	+	+	4.28442	6.61413	P49189	P49189	4-trimethylaminobutyraldehyde dehydrogenase	ALDH9A1
21.2785	20.915	21.0423	27.9235	27.1986	27.1166	12	29	29.8841	33	+	+	4.66034	6.33429	Q9H3G5;H7C0X5;A0A087WVP6;H7C218;A0A087WXJ9;C9JLV0;C9JI22	Q9H3G5;H7C0X5	Probable serine carboxypeptidase CPVL	CPVL
20.1915	21.3621	21.3771	27.0121	26.4679	26.2343	6	54.2	29.3482	16	+	+	3.59854	5.59455	A0A087X1K9;O75608;E5RGR0;E5RJ48;B4DP64;E5RI35	A0A087X1K9;O75608;E5RGR0;E5RJ48;B4DP64	Acyl-protein thioesterase 1	LYPLA1
20.9391	20.6759	20.9068	26.5865	25.6859	26.666	9	40.8	28.7581	18	+	+	4.13692	5.47222	Q9NUJ1	Q9NUJ1	Mycophenolic acid acyl-glucuronide esterase, mitochondrial	ABHD10
24.3084	24.0602	23.8676	29.0615	27.7892	28.3562	10	54.3	31.0428	48	+	+	3.42636	4.32357	P10768;X6RA14;H7BZT7;U3KQT1	P10768;X6RA14;H7BZT7;U3KQT1	S-formylglutathione hydrolase	ESD
21.732	21.29	22.1828	25.2966	24.9748	25.2285	11	26.8	27.9435	24	+	+	3.62053	3.43169	A0A0G2JJD3;O95870;A0A0G2JI89;F2Z3H2;F2Z3G6	A0A0G2JJD3;O95870	Abhydrolase domain-containing protein 16A	ABHD16A
21.136	22.1752	20.9718	25.0598	24.5461	24.83	5	23.3	27.459	8	+	+	2.95025	3.3843	Q5VST6	Q5VST6	Alpha/beta hydrolase domain-containing protein 17B	ABHD17B
21.388	22.3353	21.8968	25.1896	24.31	24.9686	5	33.7	27.4698	10	+	+	2.82642	2.94933	E9PIA8;P50897;Q5T0S4;E9PMG2;E9PSE5	E9PIA8;P50897;Q5T0S4;E9PMG2	Palmitoyl-protein thioesterase 1	PPT1
20.538	21.4335	21.9206	24.3385	22.8543	24.7052	3	23.3	26.6632	7	+	+	1.73212	2.66865	Q96IU4;B4DQI4;F8W9U3	Q96IU4;B4DQI4;F8W9U3	Alpha/beta hydrolase domain-containing protein 14B	ABHD14B
21.0533	21.2812	21.1649	23.9312	23.3601	23.6874	12	11.9	26.2224	17	+	+	3.82127	2.4931	Q96K76	Q96K76	Ubiquitin carboxyl-terminal hydrolase 47	USP47
24.5437	25.0672	25.2354	27.2534	27.2584	27.4167	14	30	30.2615	41	+	+	3.40742	2.36073	C9JIF9;P13798;H7C393;H7C1U0;C9JLK2;F8WEH5	C9JIF9;P13798;H7C393;H7C1U0	Acylamino-acid-releasing enzyme	APEH
21.5126	20.5568	21.1811	23.79	23.1295	23.2654	10	12	26.1172	17	+	+	2.58774	2.31147	Q8IY17;M0QXH7;Q6ZV29	Q8IY17	Neuropathy target esterase	PNPLA6
20.8907	20.5516	21.5009	23.3035	23.0053	23.439	4	11.4	25.7782	6	+	+	2.75349	2.2682	A0A0R4J2G3;A0A0A0MTJ9;Q6PIU2;H7C046	A0A0R4J2G3;A0A0A0MTJ9;Q6PIU2;H7C046	Neutral cholesterol ester hydrolase 1	NCEH1
21.2781	22.0288	20.8801	23.8693	23.2771	23.2338	4	11.3	26.0577	8	+	+	2.19676	2.06437	Q9HB40;I3L4Z3;I3L506;I3L2N6	Q9HB40;I3L4Z3	Retinoid-inducible serine carboxypeptidase	SCPEP1
21.0988	20.9345	21.2407	23.5213	22.9068	22.9548	5	17.5	25.7967	7	+	+	3.14946	2.03632	Q9BV23;A0A087X2C5;C9J010;C9JNE7	Q9BV23;A0A087X2C5	Monoacylglycerol lipase ABHD6	ABHD6
21.5994	20.7069	21.1811	22.7359	23.1382	23.4482	7	13.4	26.0193	10	+	+	2.38183	1.94497	Q14694;H3BQP1;H3BNS8;H3BQC6;H3BNA1;J3KT19	Q14694	Ubiquitin carboxyl-terminal hydrolase 10	USP10
27.8385	27.3121	27.7452	29.8762	29.2871	29.2072	59	35.2	32.522	234	+	+	2.62594	1.8249	P49327;A0A0U1RQF0;A0A0U1RRG3;J3KTF0	P49327;A0A0U1RQF0	Fatty acid synthase;[Acyl-carrier-protein] S-acetyltransferase;[Acyl-carrier-protein] S-malonyltransferase;3-oxoacyl-[acyl-carrier-protein] synthase;3-oxoacyl-[acyl-carrier-protein] reductase;3-hydroxyacyl-[acyl-carrier-protein] dehydratase;Enoyl-[acyl-carrier-protein] reductase;Oleoyl-[acyl-carrier-protein] hydrolase	FASN
21.7808	21.6709	20.5997	23.4561	22.7996	22.7931	3	8.5	25.6242	4	+	+	1.72587	1.66579	Q8N2K0;I3L294;Q5T712;I3L1V0	Q8N2K0	Monoacylglycerol lipase ABHD12	ABHD12
20.4293	20.705	20.7421	27.3536	26.21	27.4447	8	48.1	29.6235	27	+	+	4.00395	6.37732	A0A0B4J2D5;A0A096LPI6;P30042;A0A096LNH5;H7C1F6;H7C2G3;A0A0B4J2H4;A0A096LP73;F2Z2Q0;A0A096LP12;A0A096LNJ1	A0A0B4J2D5;A0A096LPI6;P30042;A0A096LNH5;H7C1F6;H7C2G3;A0A0B4J2H4	ES1 protein homolog, mitochondrial	C21orf33
21.5671	21.1434	20.4327	25.6342	25.8532	25.9873	2	19.6	29.357	8	+	+	3.79444	4.77719	Q59GN2;P62891	Q59GN2;P62891	Putative 60S ribosomal protein L39-like 5;60S ribosomal protein L39	RPL39P5;RPL39
21.0149	20.794	20.5475	25.7932	25.2055	25.6177	13	33.3	28.2041	26	+	+	4.5634	4.75332	P08670;B0YJC4;B0YJC5;Q5JVS8;H7C5W5;F8W835;A0A087WYG8;E7EMV2;E7ESP9;P41219;Q16352;P07196;P07197;P12036	P08670;B0YJC4;B0YJC5	Vimentin	VIM
22.4234	21.214	22.2075	26.9858	26.4683	26.4383	18	30.4	29.3342	50	+	+	3.46368	4.6825	H7BXI1;A0A087WXU3;A0FGR8	H7BXI1;A0A087WXU3;A0FGR8	Extended synaptotagmin-2	ESYT2
20.9359	21.7174	21.7553	26.3709	25.6347	25.7614	8	37	28.5855	25	+	+	3.6547	4.45282	Q9Y6C9;E9PIE4	Q9Y6C9;E9PIE4	Mitochondrial carrier homolog 2	MTCH2
21.0623	20.7469	21.0099	25.3738	24.9937	25.4951	7	31.3	27.875	23	+	+	4.76069	4.34782	P30519;A0A087WT44;I3L159;I3L1F5;I3L4P8;I3L463;I3L1Y2;I3L276	P30519;A0A087WT44;I3L159;I3L1F5	Heme oxygenase 2	HMOX2
23.5089	23.5984	23.447	27.8576	27.484	27.357	14	22.4	30.2473	36	+	+	4.8767	4.0481	P50416;H3BMD2;H3BUJ0;H3BP22;H3BUV7;Q92523	P50416	Carnitine O-palmitoyltransferase 1, liver isoform	CPT1A
21.3099	20.9451	21.153	25.3878	24.5588	25.5612	7	30.1	27.7933	17	+	+	3.60578	4.03326	P50502;H7C3I1;Q3KNR6;A0A087X1H6;F6VDH7;Q8IZP2;Q8NFI4;F8WAQ7	P50502;H7C3I1;Q3KNR6;A0A087X1H6;F6VDH7;Q8IZP2;Q8NFI4	Hsc70-interacting protein;Putative protein FAM10A4;Putative protein FAM10A5	ST13;ST13P4;ST13P5
21.503	20.7778	21.2639	25.3646	24.7844	25.0831	2	25.3	28.4034	9	+	+	3.86453	3.8958	E9PJD9;E9PLL6;P46776;E9PLX7	E9PJD9;E9PLL6;P46776;E9PLX7	60S ribosomal protein L27a	RPL27A
21.9453	22.0338	21.9522	25.4366	25.5226	26.4154	4	52.9	28.651	19	+	+	3.57811	3.81444	H3BUX2;J3KNF8;O43169;D6RFH4;J3QR91	H3BUX2;J3KNF8;O43169;D6RFH4	Cytochrome b5 type B	CYB5B
21.436	22.0163	20.8588	25.1348	24.4641	24.9358	5	34.8	27.6436	18	+	+	3.02941	3.40787	F8W914;Q9NQC3;H7C106;A0A0U1RQR6	F8W914;Q9NQC3	Reticulon;Reticulon-4	RTN4
21.5037	21.2871	20.7828	25.2145	24.2461	24.142	8	12.7	27.2246	14	+	+	2.93915	3.34302	Q8NEL9;A0A087X0H7	Q8NEL9;A0A087X0H7	Phospholipase DDHD1	DDHD1
21.5249	21.0362	22.1175	25.2689	24.7731	24.5197	4	40.7	27.8046	9	+	+	3.00138	3.29436	Q01469;I6L8B7;A8MUU1	Q01469;I6L8B7	Fatty acid-binding protein, epidermal	FABP5
21.4784	20.4706	20.541	24.2301	23.9836	24.0753	7	14.2	26.7768	15	+	+	3.21919	3.26633	Q99081;H0YNQ5;B4DZP2	Q99081;H0YNQ5	Transcription factor 12	TCF12
21.2718	20.7551	21.4205	24.4571	24.4343	24.3289	8	22.4	27.1934	14	+	+	4.03383	3.25761	Q9Y6G9;E9PHI6;C9JGM7	Q9Y6G9;E9PHI6	Cytoplasmic dynein 1 light intermediate chain 1	DYNC1LI1
21.9949	20.8603	20.6338	24.2383	23.8135	24.4816	3	26	26.8169	13	+	+	2.53805	3.01481	Q9Y3P8;A0A087WXW3	Q9Y3P8;A0A087WXW3	Signaling threshold-regulating transmembrane adapter 1	SIT1
21.3298	21.4993	20.7261	24.1001	23.8953	23.9271	6	40.8	26.7683	9	+	+	3.48219	2.78912	E7EMS6;P21964;E7EUU8;H7BZ45;F8WBW9	E7EMS6;P21964;E7EUU8;H7BZ45	Catechol O-methyltransferase	COMT
20.7976	20.8083	21.1685	23.3551	23.4775	23.7477	9	15.1	26.3812	15	+	+	3.99114	2.60195	F8W726;Q14157;Q5VU79;Q5VU78;Q5VU77;Q5VU81;Q5VU80;H0Y5H6;H7C2T8	F8W726;Q14157	Ubiquitin-associated protein 2-like	UBAP2L
20.5578	20.5368	21.1879	23.276	23.775	22.5245	4	11.1	26.3131	6	+	+	2.34794	2.431	P37198;M0QXN5	P37198;M0QXN5	Nuclear pore glycoprotein p62	NUP62
24.3063	24.9826	24.7849	26.9091	27.2858	27.112	18	44.7	30.1648	63	+	+	3.3416	2.41103	O00116;B8ZZ81	O00116	Alkyldihydroxyacetonephosphate synthase, peroxisomal	AGPS
21.6424	21.7695	20.6027	24.1174	23.438	23.5907	4	7.7	26.2354	8	+	+	2.30719	2.37716	Q03518	Q03518	Antigen peptide transporter 1	TAP1
21.1214	21.9259	20.4494	23.52	23.0769	23.7894	7	21.8	26.145	12	+	+	2.07511	2.29654	E7EVW7;P14317	E7EVW7;P14317	Hematopoietic lineage cell-specific protein	HCLS1
23.2204	23.7612	23.3374	26.0672	25.8215	25.0786	17	21.5	28.6821	31	+	+	2.54565	2.2161	O94906	O94906	Pre-mRNA-processing factor 6	PRPF6
20.9574	21.8164	22.1699	23.7636	23.6908	24.0234	5	22.3	26.6956	9	+	+	2.36395	2.17807	K7EQ02;K7EQ55;K7EK33;Q96EP5	K7EQ02;K7EQ55;K7EK33;Q96EP5	DAZ-associated protein 1	DAZAP1
22.0094	21.6924	21.226	23.8453	23.2388	24.0261	5	8.8	26.3466	8	+	+	2.47809	2.06079	Q7Z4Q2	Q7Z4Q2	HEAT repeat-containing protein 3	HEATR3
21.0111	20.0957	20.8124	23.089	22.0682	22.9437	4	10.4	25.4576	7	+	+	2.08554	2.06055	Q9UMX0;Q9UHD9;H0YDS0;Q9NRR5	Q9UMX0;Q9UHD9	Ubiquilin-1;Ubiquilin-2	UBQLN1;UBQLN2
25.0332	25.1429	24.7228	27.0628	26.8087	27.1785	23	28.9	29.9753	55	+	+	3.6014	2.05037	P16615;H7C5W9;O14983;A0A0C4DH86;H3BVB2;H3BTW4	P16615;H7C5W9	Sarcoplasmic/endoplasmic reticulum calcium ATPase 2	ATP2A2
20.3973	20.3943	21.7922	22.4108	23.372	22.9073	6	12.6	25.9967	8	+	+	1.70231	2.03542	O15228;Q5TBH8;Q5TBH6	O15228;Q5TBH8	Dihydroxyacetone phosphate acyltransferase	GNPAT
21.3952	20.0683	20.6712	22.8795	22.3852	22.7947	5	6.4	25.3981	8	+	+	2.05795	1.97488	O14974;F8VZN8;A0A0U1RQZ1;H0YIM2;H0YIS3;H0YIS4;H0YHI8	O14974;F8VZN8	Protein phosphatase 1 regulatory subunit 12A	PPP1R12A
21.0961	21.5063	21.4756	23.4416	23.2535	23.2835	6	13	26.2785	8	+	+	3.77579	1.96687	A0A0A0MSJ0;Q86XP3	A0A0A0MSJ0;Q86XP3	ATP-dependent RNA helicase DDX42	DDX42
21.2622	21.0138	20.5475	23.0726	22.4794	23.0328	7	14.8	25.4805	8	+	+	2.60425	1.92043	O94830;H0YF30;H0YF17;E9PPH8;E9PIF5;E9PQY9;E9PKE6	O94830	Phospholipase DDHD2	DDHD2
22.6382	22.7601	23.265	24.5548	25.3305	24.4022	13	11.6	27.8545	27	+	+	2.252	1.87473	E7EX73;E9PGM1;E7EUU4;Q04637;A0A0A0MR52;C9JF13;C9J6B6;C9K073;H7C0V6;C9J2Z7;A0A0A0MSA7;A0A0U1RQK7;O43432;H7C044	E7EX73;E9PGM1;E7EUU4;Q04637;A0A0A0MR52;C9JF13	Eukaryotic translation initiation factor 4 gamma 1	EIF4G1
21.0641	20.9116	21.0971	23.0292	22.5766	23.0168	9	7.7	25.6244	15	+	+	3.50141	1.84994	Q7LBC6;H0Y9V5	Q7LBC6	Lysine-specific demethylase 3B	KDM3B
23.2601	24.0662	24.4106	25.57	25.4428	26.1395	18	22.2	28.7745	40	+	+	1.96014	1.80513	Q8WUM4;C9IZF9;F8WEQ7;F8WBR8;F8WDK9	Q8WUM4	Programmed cell death 6-interacting protein	PDCD6IP
21.2894	20.5443	21.5909	22.5594	22.904	23.1759	8	8	25.7217	14	+	+	2.07808	1.73823	Q15648	Q15648	Mediator of RNA polymerase II transcription subunit 1	MED1
20.6518	21.7116	20.9032	22.6746	22.598	22.9549	2	19	26.3073	4	+	+	2.09394	1.65362	C9JXB8;C9JNW5;P83731	C9JXB8;C9JNW5;P83731	60S ribosomal protein L24	RPL24
21.6103	21.0213	21.4698	22.6789	22.929	22.9062	6	5.9	25.5714	6	+	+	2.78354	1.4709	Q9Y2W1	Q9Y2W1	Thyroid hormone receptor-associated protein 3	THRAP3
23.3851	24.1927	24.2753	21.0131	20.6021	21.813	6	29	27.1535	8	+		2.45596	-2.80827	P78417;Q5TA02;Q5TA01	P78417;Q5TA02;Q5TA01	Glutathione S-transferase omega-1	GSTO1
22.166	21.3662	21.5895	23.3868	22.7851	23.1523	5	19.6	25.8192	9			2.0431	1.40083	Q99487;Q5SY01;Q5SY00	Q99487	Platelet-activating factor acetylhydrolase 2, cytoplasmic	PAFAH2
23.9586	24.6098	25.0798	25.6458	25.7344	25.7341	7	27.2	29.1438	29			1.61943	1.15537	X5D2R7;P28062;Q5JNW7	X5D2R7;P28062;Q5JNW7	Proteasome subunit beta type;Proteasome subunit beta type-8	PSM8;PSMB8
24.9224	23.6829	24.0856	24.2846	25.302	24.7072	7	16.8	28.2892	15			0.496795	0.5343	Q06203;D6RCC8;D6RE15	Q06203	Amidophosphoribosyltransferase	PPAT
23.7	23.905	23.7588	23.9432	24.0131	23.6689	17	21.5	27.6759	38			0.290103	0.0871321	Q93009;H3BND8;F5H2X1;H3BUV0;H3BTM1;H3BRA2;H3BQD1	Q93009;H3BND8	Ubiquitin carboxyl-terminal hydrolase 7;Ubiquitin carboxyl-terminal hydrolase	USP7
25.208	25.0081	25.0835	24.6754	25.3402	25.4121	12	17.5	29.0011	48			0.0613188	0.0426998	Q14697;F5H6X6;E9PKU7;E9PNH1	Q14697;F5H6X6;E9PKU7	Neutral alpha-glucosidase AB	GANAB
22.8285	22.7314	22.5099	22.8787	22.838	22.4701	7	15.6	26.4341	17			0.0861779	0.0390002	P07237;H7BZ94;H0Y3Z3;I3L0S0;I3L398;I3L4M2;I3L3P5;I3NI03;I3L3U6;I3L312	P07237;H7BZ94;H0Y3Z3	Protein disulfide-isomerase	P4HB
28.6267	27.549	28.1983	27.4493	28.1816	28.024	11	55.5	31.8827	46			0.246737	-0.239699	P04406;E7EUT5;O14556	P04406;E7EUT5	Glyceraldehyde-3-phosphate dehydrogenase	GAPDH
24.1996	24.3495	24.2699	23.9497	23.8699	23.9349	11	32.9	27.8751	28			2.68948	-0.354834	P30101	P30101	Protein disulfide-isomerase A3	PDIA3
24.9061	25.369	25.6938	24.4661	25.4952	24.7961	12	26.5	29.1181	42			0.45889	-0.403833	P54578;A6NJA2	P54578;A6NJA2	Ubiquitin carboxyl-terminal hydrolase 14;Ubiquitin carboxyl-terminal hydrolase	USP14
23.3494	23.552	23.7893	23.0092	23.5371	22.8823	11	21.8	27.3803	30			0.820851	-0.420701	P45974;F5H571;H7C5J3;Q92995	P45974	Ubiquitin carboxyl-terminal hydrolase 5	USP5
25.2476	25.5892	25.2938	24.9324	25.1583	24.686	12	11.7	28.954	35			1.22306	-0.4513	O15067;H0YGH1;J3KTQ5;J3KTL4;J3QSG0;J3QSH6	O15067	Phosphoribosylformylglycinamidine synthase	PFAS
27.1989	27.5493	27.8034	26.8125	27.3602	27.0174	50	33.9	31.2066	150			0.892154	-0.453833	F8VPD4;P27708;H7BZB3;H7C2E4;H7C3Z5;P31327	F8VPD4;P27708	CAD protein;Glutamine-dependent carbamoyl-phosphate synthase;Aspartate carbamoyltransferase;Dihydroorotase	CAD
23.3363	24.5866	24.4359	23.3207	23.5995	23.7354	12	16.6	27.8931	29			0.618392	-0.567733	G5E9A6;P51784;Q5JXD3;H7C189;Q13107	G5E9A6;P51784	Ubiquitin carboxyl-terminal hydrolase;Ubiquitin carboxyl-terminal hydrolase 11	USP11
23.5892	24.2914	23.5022	22.5964	23.5221	23.1367	6	12.3	27.3736	20			0.90218	-0.7092	Q08J23	Q08J23	tRNA (cytosine(34)-C(5))-methyltransferase	NSUN2
25.0052	23.2676	23.1677	22.8701	23.203	22.9585	8	29.8	27.3299	16			0.593476	-0.802966	Q15084	Q15084	Protein disulfide-isomerase A6	PDIA6
24.8203	24.6366	23.8489	24.1781	24.4114	24.6852	6	35.4	28.4195	25			0.0102883	-0.0103664	P18669;Q8N0Y7;P15259	P18669;Q8N0Y7	Phosphoglycerate mutase 1;Probable phosphoglycerate mutase 4	PGAM1;PGAM4
22.8895	23.201	23.9469	22.6359	23.0131	23.1286	5	27.5	27.1539	11			0.533028	-0.419933	P67775;P62714;H0YC23;E5RHC1;H0YBN9;E5RI56;E5RFI3;E5RHP4;E7ESG8	P67775;P62714	Serine/threonine-protein phosphatase 2A catalytic subunit alpha isoform;Serine/threonine-protein phosphatase 2A catalytic subunit beta isoform	PPP2CA;PPP2CB
25.2143	25.1223	25.1443	24.5739	24.6898	24.7847	11	28.8	28.7098	27			2.68919	-0.4775	Q5T6H7;Q9NQW7;Q5T6H3;Q5T6H2	Q5T6H7;Q9NQW7	Xaa-Pro aminopeptidase 1	XPNPEP1
22.9171	23.7394	23.3641	21.9522	23.5777	22.6882	6	22.8	27.03	19			0.498155	-0.600834	A6NFX8;Q9UKK9;A6NJU6;A6NCQ0;H0YEY4;C9JYY9	A6NFX8;Q9UKK9;A6NJU6;A6NCQ0	ADP-sugar pyrophosphatase	NUDT5
24.5716	25.1884	25.1653	20.9981	24.2165	23.9522	2	34.8	28.6562	10			0.848126	-1.91949	P62136;E9PMD7;H0Y3Y6;F5H1L6;F5H037;F8WE71;F8W1A0	P62136;E9PMD7	Serine/threonine-protein phosphatase PP1-alpha catalytic subunit;Serine/threonine-protein phosphatase	PPP1CA
23.5467	23.4532	23.0818	24.5929	24.4539	24.3977	10	13	27.727	29			2.72957	1.12093	Q9Y6Y8;H7C0V8;A0A0C4DH82;H7C4C4	Q9Y6Y8	SEC23-interacting protein	SEC23IP
22.1401	21.9956	22.534	21.8088	22.9294	22.2134	9	15.7	26.2517	16			0.0917629	0.0939662	K7EJE8;K7EKE6;P36776;K7ER27;K7ERR6	K7EJE8;K7EKE6;P36776	Lon protease homolog, mitochondrial	LONP1
25.1174	24.8628	25.7708	24.4841	25.1805	25.0593	23	23.5	28.9551	51			0.422946	-0.342367	P29144;Q5VZU9	P29144;Q5VZU9	Tripeptidyl-peptidase 2	TPP2
24.7515	24.2154	24.6197	23.5816	24.4724	24.1841	15	29.2	28.1062	30			0.661033	-0.4495	P48147	P48147	Prolyl endopeptidase	PREP
24.8902	24.6108	24.6665	22.8053	24.1979	24.2544	5	18.2	28.2048	14			0.942218	-0.969966	O00154;K7EKP8	O00154;K7EKP8	Cytosolic acyl coenzyme A thioester hydrolase	ACOT7
21.7999	21.9561	21.3333	20.3483	20.2492	20.3043	2	3.2	24.4626	2	+		2.74431	-1.39584	Q9P2I0	Q9P2I0	Cleavage and polyadenylation specificity factor subunit 2	CPSF2
26.619	26.7329	26.7859	25.3598	24.8258	25.3717	11	30	29.8997	29	+		2.91517	-1.52683	P60842;J3KT12;J3QL43;J3QS69;J3QR64;J3KSZ0;J3KTB5;J3QLN6;J3KS25;J3KTN0;J3QKZ9;J3QL52;J3KT04;J3KS93;E7EMV8	P60842;J3KT12;J3QL43;J3QS69;J3QR64;J3KSZ0;J3KTB5	Eukaryotic initiation factor 4A-I	EIF4A1
23.0621	22.345	22.5745	20.9692	21.4527	20.8262	7	32.2	26.397	15	+		2.28955	-1.57781	Q15181;Q5SQT6	Q15181	Inorganic pyrophosphatase	PPA1
22.9843	23.2054	22.9203	21.0465	21.0334	22.2459	5	9.4	26.1484	13	+		1.74802	-1.59474	B0QY89;Q9Y262;B0QY90;C9JHP4;C9K0Q7	B0QY89;Q9Y262;B0QY90	Eukaryotic translation initiation factor 3 subunit L	EIF3L
23.2862	22.4044	22.7715	21.1064	21.1358	21.406	9	23.3	26.0605	14	+		2.37855	-1.60464	P28838;H0Y9Q1;H0Y983	P28838;H0Y9Q1	Cytosol aminopeptidase	LAP3
22.883	22.9368	22.8877	21.6126	21.2131	20.9788	4	26.9	25.8191	7	+		3.03522	-1.63433	P61758;B4DWR3	P61758;B4DWR3	Prefoldin subunit 3	VBP1
23.1718	22.9419	22.6149	20.828	21.8282	21.1106	5	15.3	26.0794	12	+		2.08914	-1.65392	P43490;A0A0C4DFS8	P43490;A0A0C4DFS8	Nicotinamide phosphoribosyltransferase	NAMPT
22.5139	22.8695	22.9732	21.7076	20.4661	21.0441	12	2.8	25.6179	18	+		1.94986	-1.71295	Q9NU22;Q5T795	Q9NU22	Midasin	MDN1
22.7704	22.2942	22.4332	20.5369	20.1747	21.6328	7	40.5	26.6338	10	+		1.69246	-1.71778	G3V5Q1;G3V3M6;P27695;A0A0C4DGK8;G3V3C7;G3V5D9;G3V5M0;G3V359;H7C4A8;G3V3Y6	G3V5Q1;G3V3M6;P27695;A0A0C4DGK8;G3V3C7;G3V5D9;G3V5M0;G3V359	DNA-(apurinic or apyrimidinic site) lyase;DNA-(apurinic or apyrimidinic site) lyase, mitochondrial	APEX1
23.0455	22.8054	22.5872	21.3225	20.8647	21.0593	5	9.8	26.2829	8	+		3.11683	-1.7305	Q14258	Q14258	E3 ubiquitin/ISG15 ligase TRIM25	TRIM25
23.1472	23.3475	22.8332	21.2624	21.7565	20.6643	6	10.5	26.3172	11	+		2.24018	-1.88156	P46977;A0A0C4DH80;E9PN73;E9PI32	P46977;A0A0C4DH80;E9PN73;E9PI32	Dolichyl-diphosphooligosaccharide--protein glycosyltransferase subunit STT3A	STT3A
22.585	22.3745	22.501	21.1343	19.8795	20.7928	5	19.4	26.1185	9	+		2.11495	-1.88461	P57088;D6RAA6;J3KN43;D6RBY2;H0Y8N0	P57088;D6RAA6	Transmembrane protein 33	TMEM33
22.6937	22.5605	23.4833	20.7564	21.5734	20.566	9	14.4	26.6089	14	+		2.00193	-1.94723	P07384;E9PLX0;E9PJJ3;E9PLC9;E9PMC6;E9PJA6;E9PSA6;E9PQB3;E9PRM1	P07384	Calpain-1 catalytic subunit	CAPN1
22.6476	22.6321	23.0875	21.2826	20.6117	20.6038	3	13.3	26.1947	5	+		2.71544	-1.95636	P30048	P30048	Thioredoxin-dependent peroxide reductase, mitochondrial	PRDX3
23.183	23.3141	22.0889	21.7623	20.2995	20.6421	5	11.9	26.0745	11	+		1.53745	-1.96071	Q16401;F2Z3J2;Q4VXH0	Q16401	26S proteasome non-ATPase regulatory subunit 5	PSMD5
22.7008	22.582	22.0927	21.2673	19.8816	19.9963	3	4.5	25.4825	7	+		1.90273	-2.07677	P50747	P50747	Biotin--protein ligase;Biotin--[methylmalonyl-CoA-carboxytransferase] ligase;Biotin--[propionyl-CoA-carboxylase [ATP-hydrolyzing]] ligase;Biotin--[methylcrotonoyl-CoA-carboxylase] ligase;Biotin--[acetyl-CoA-carboxylase] ligase	HLCS
22.9618	22.5067	23.0071	20.3914	21.324	20.3773	2	24	25.8983	7	+		2.42419	-2.12764	J3KRE2;J3KTF8;J3QQX2;P52565;J3KS60;J3KRY1	J3KRE2;J3KTF8;J3QQX2;P52565;J3KS60;J3KRY1	Rho GDP-dissociation inhibitor 1	ARHGDIA
22.1693	23.0566	22.2829	20.0486	20.5812	20.3532	6	13.3	26.0913	11	+		2.61853	-2.17523	Q10471	Q10471	Polypeptide N-acetylgalactosaminyltransferase 2;Polypeptide N-acetylgalactosaminyltransferase 2 soluble form	GALNT2
23.666	23.9735	23.2721	21.4232	21.099	21.7249	6	20.2	26.7617	15	+		2.91372	-2.22151	P60228;H0YBR5;E5RGA2;E5RIT4;H0YAW4;H0YBP5;E5RII3;E5RHS5	P60228;H0YBR5;E5RGA2	Eukaryotic translation initiation factor 3 subunit E	EIF3E
22.9167	22.9604	22.7048	20.3328	21.0479	20.5	5	12.9	26.153	10	+		3.20169	-2.23375	Q8N1G4	Q8N1G4	Leucine-rich repeat-containing protein 47	LRRC47
24.046	24.3412	24.032	20.0925	23.7527	21.4502	15	20.1	27.5146	26	+		1.03944	-2.37459	Q9H0A0	Q9H0A0	N-acetyltransferase 10	NAT10
23.3033	23.6143	21.9701	20.722	20.3642	20.3166	2	16.6	26.6127	9	+		2.06166	-2.49496	A0A0U1RR32;A0A0U1RRH7;Q99878;Q96KK5;Q9BTM1;Q16777;Q93077;Q7L7L0;Q6FI13;P20671;P0C0S8;P04908;H0YFX9;C9J0D1;Q8IUE6;Q96QV6;P16104	A0A0U1RR32;A0A0U1RRH7;Q99878;Q96KK5;Q9BTM1;Q16777;Q93077;Q7L7L0;Q6FI13;P20671;P0C0S8;P04908;H0YFX9;C9J0D1;Q8IUE6;Q96QV6;P16104	Histone H2A type 1-J;Histone H2A type 1-H;Histone H2A.J;Histone H2A type 2-C;Histone H2A type 1-C;Histone H2A type 3;Histone H2A type 2-A;Histone H2A type 1-D;Histone H2A type 1;Histone H2A type 1-B/E;Histone H2A;Histone H2A type 2-B;Histone H2A type 1-A;Histone H2AX	HIST1H2AJ;HIST1H2AH;H2AFJ;HIST2H2AC;HIST1H2AC;HIST3H2A;HIST2H2AA3;HIST1H2AD;HIST1H2AG;HIST1H2AB;H2AFV;HIST2H2AB;HIST1H2AA;H2AFX
23.3869	24.632	24.0127	20.9435	21.4468	21.6543	3	18.3	26.9896	3	+		2.511	-2.66232	J3QLE5;A8MT02;P63162;P14678;J3KRY3;S4R3P3	J3QLE5;A8MT02;P63162;P14678	Small nuclear ribonucleoprotein-associated protein N;Small nuclear ribonucleoprotein-associated proteins B and B	SNRPN;SNRPB
23.3924	23.5976	22.9466	20.8362	20.4365	20.5364	5	19	26.1495	10	+		3.55214	-2.70918	P05198;G3V4T5;H0YJS4	P05198;G3V4T5	Eukaryotic translation initiation factor 2 subunit 1	EIF2S1
23.0173	23.594	23.5553	20.6221	20.9453	19.9409	3	12	26.7932	8	+		2.92973	-2.88611	Q00796;H0YKB3;H0YLA4	Q00796;H0YKB3;H0YLA4	Sorbitol dehydrogenase	SORD
23.9232	24.2005	24.278	21.4399	21.0219	21.2038	8	21.8	27.5428	14	+		4.2495	-2.91201	Q13547;Q5TEE2;E5RK19;E5RFI6;E5RJ04;E5RGV4;E5RHE7;E5RH52;E5RG37;E5RFP9;H3BM24;E7ESJ6;O15379	Q13547;Q5TEE2	Histone deacetylase 1	HDAC1
23.3774	23.7215	24.5523	21.1869	20.471	20.6182	6	21.5	26.8168	7	+		2.79279	-3.12506	Q96AG4;I3L223	Q96AG4	Leucine-rich repeat-containing protein 59	LRRC59
24.2127	24.7385	24.3064	20.4189	21.5618	20.8769	3	9.5	27.6643	13	+		3.1434	-3.46667	P14324;A0A087WTP2;A0A087X1D8;A0A087WVN4;A0A087X090	P14324;A0A087WTP2;A0A087X1D8;A0A087WVN4	Farnesyl pyrophosphate synthase	FDPS
26.2104	25.6401	25.5582	20.4431	20.4978	21.4676	4	34.3	28.7548	8	+		3.66702	-5.00008	A0A087WXM6;J3QQT2;J3KRX5;A0A0A6YYL6;P18621;J3QLC8;A0A0A0MRF8;J3KRB3;A0A087WWH0;J3QS96;J3KSJ0;A0A087WY81	A0A087WXM6;J3QQT2;J3KRX5;A0A0A6YYL6;P18621;J3QLC8;A0A0A0MRF8;J3KRB3;A0A087WWH0;J3QS96	60S ribosomal protein L17	RPL17;RPL17-C18orf32
20.6333	22.7605	24.4783	24.5	24.2723	25.3167	4	17	27.9454	16			0.830932	2.0723	Q5T760;Q05519;B4DWT1;Q5T757	Q5T760;Q05519;B4DWT1	Serine/arginine-rich splicing factor 11	SRSF11
20.5239	20.8815	23.4386	23.3369	23.5064	23.6637	4	4.2	26.8846	11			0.957843	1.88765	Q9NVI1;H3BP78;F8W7R3	Q9NVI1;H3BP78;F8W7R3	Fanconi anemia group I protein	FANCI
20.4938	21.8143	20.3053	22.3302	22.8165	22.38	3	6.6	26.0746	5			1.51603	1.63777	F6TLX2;Q9HC38;I3L1I0;I3L3Q4	F6TLX2;Q9HC38	Glyoxalase domain-containing protein 4	GLOD4
23.9775	22.744	24.3274	25.5746	25.0758	25.267	10	53.5	28.4663	33			1.49704	1.62283	A0A0A0MR02;P45880;Q5JSD2;Q5JSD1;A2A3S1	A0A0A0MR02;P45880;Q5JSD2;Q5JSD1	Voltage-dependent anion-selective channel protein 2	VDAC2
20.7304	21.7562	20.5003	23.1108	22.2567	22.4669	7	6.8	25.0436	10			1.59778	1.61584	I3L4X2;P33527;A0A0A0MS99;O15438	I3L4X2;P33527;A0A0A0MS99	Multidrug resistance-associated protein 1	ABCC1
21.0892	20.8916	19.9646	22.4356	22.5002	21.7388	2	5.4	24.918	3			1.68871	1.57638	O94919	O94919	Endonuclease domain-containing 1 protein	ENDOD1
20.6897	20.797	21.5089	22.5938	21.8693	22.9405	3	22.8	25.9598	6			1.64673	1.46933	H3BQF1;P07741;H3BSW3;H3BQZ9;H3BQB1	H3BQF1;P07741;H3BSW3;H3BQZ9;H3BQB1	Adenine phosphoribosyltransferase	APRT
21.0357	20.5455	21.2	23.0745	21.2771	22.8343	2	13	25.0401	4			1.15712	1.46827	E9PQX9;C9JCC6;Q14919;E9PNC7;E9PMW2	E9PQX9;C9JCC6;Q14919;E9PNC7;E9PMW2	Dr1-associated corepressor	DRAP1
19.867	20.3006	21.0523	21.8772	21.8816	21.7906	2	14.5	24.5609	4			1.84677	1.44317	K7ENH2;B3KQ25;K7ESG5;K9J957;P61289;K7EMD0;K7EPX6;K7EKR3;A0A087WTV2	K7ENH2;B3KQ25;K7ESG5;K9J957;P61289;K7EMD0;K7EPX6;K7EKR3;A0A087WTV2	Proteasome activator complex subunit 3	PSME3
21.1781	20.856	21.6487	23.209	22.4706	22.1481	2	7.2	25.0568	3			1.62297	1.38161	Q96EX2;A0A087X026;F8W6L4	Q96EX2;A0A087X026;F8W6L4	RING finger and transmembrane domain-containing protein 2	RNFT2
21.5284	21.8456	20.5641	22.4235	23.2178	22.4247	2	8.1	26.8152	6			1.37433	1.37597	H0YMZ1;H0YN18;H0YL69;P25789;H0YLS6;H0YLC2;H0YKT8;H0YMI6;H0YMA1	H0YMZ1;H0YN18;H0YL69;P25789;H0YLS6;H0YLC2;H0YKT8;H0YMI6;H0YMA1	Proteasome subunit alpha type;Proteasome subunit alpha type-4;Proteasome subunit beta type	PSMA4
21.4106	20.8471	20.9864	22.4514	22.5713	22.1786	3	22.1	25.2992	5			2.51916	1.31909	F8WDD7;F8WCF6;A0A0A6YYG9;P59998;R4GN08;H7C0A3	F8WDD7;F8WCF6;A0A0A6YYG9;P59998;R4GN08	Actin-related protein 2/3 complex subunit 4	ARPC4;ARPC4-TTLL3
20.718	20.3211	22.3892	22.6051	22.3407	22.4186	7	11.1	25.5508	10			0.962272	1.31206	H3BP71;O75150;H3BS50;A0A087WTK2	H3BP71;O75150	E3 ubiquitin-protein ligase BRE1B	RNF40
24.6642	24.0705	24.5842	26.0152	25.6829	25.4814	6	29	29.0023	16			2.21738	1.28687	Q9Y277;E5RFP6;E5RJN6;E5RHZ6;E5RHE1;E5RK27;E5RFL1	Q9Y277;E5RFP6;E5RJN6;E5RHZ6;E5RHE1;E5RK27	Voltage-dependent anion-selective channel protein 3	VDAC3
20.9896	20.4136	20.3185	21.2549	21.8219	22.4653	3	6.7	25.5055	11			1.451	1.27348	G3V1D3;G3V180;Q9NY33;E9PNX5;E9PKK8;E9PQ14;E9PPK9	G3V1D3;G3V180;Q9NY33	Dipeptidyl peptidase 3	DPP3
26.822	25.0011	26.0857	27.5266	26.9298	27.15	37	20.2	30.5036	119			1.0397	1.23253	Q9UQ35;I3L4D8;I3L182;I3L1I8;A0A087X1W1;I3L1C0;I3L3Q8;I3L0N7	Q9UQ35	Serine/arginine repetitive matrix protein 2	SRRM2
20.921	21.1824	20.659	21.8589	21.9289	22.6691	6	17	25.0974	10			1.82993	1.23151	Q9UBT2;K7EPL2;U3KQ55;K7ES38;K7ESK7	Q9UBT2;K7EPL2	SUMO-activating enzyme subunit 2	UBA2
20.8997	21.4062	21.358	22.0853	22.9634	22.3032	3	18.8	26.3895	6			1.78259	1.22935	Q9UBQ5;K7ES31;K7ERF1;B4DQ48;K7EK53;K7EQM4;A0A087WVB9	Q9UBQ5;K7ES31;K7ERF1	Eukaryotic translation initiation factor 3 subunit K	EIF3K
20.9012	20.6942	21.0492	21.2542	22.323	22.6869	6	4.4	24.9593	8			1.27987	1.20649	Q9Y2I7;E9PDH4	Q9Y2I7;E9PDH4	1-phosphatidylinositol 3-phosphate 5-kinase	PIKFYVE
20.3552	20.8804	21.65	22.4882	21.7334	22.2678	7	9.1	25.0697	10			1.2868	1.20125	O95155;K7EP75;B1AQ61	O95155	Ubiquitin conjugation factor E4 B	UBE4B
23.3092	21.0823	21.1202	22.6934	23.0338	23.3864	4	21.1	26.7946	9			0.719896	1.20062	Q92688	Q92688	Acidic leucine-rich nuclear phosphoprotein 32 family member B	ANP32B
21.2836	20.8344	22.0514	23.1961	22.3283	22.243	3	14.6	25.0901	6			1.20459	1.19934	Q9NXW9	Q9NXW9	Alpha-ketoglutarate-dependent dioxygenase alkB homolog 4	ALKBH4
23.7021	23.4414	24.6232	25.1103	24.8647	25.2921	29	19.9	28.5426	56			1.43113	1.1668	A0A087WY61;Q14980;F5H4J1;F5H6Y5;H0YFY6;F5H2F3;F5H3L6;F5H0Z7;F5H763;F5GZW1;K4DIE0;F5GWK2;F5H073;F5H068;F8W6T3;F5H1L0;F5H7R5;F5H4Y4;F5GWA2	A0A087WY61;Q14980	Nuclear mitotic apparatus protein 1	NUMA1
26.798	20.9263	26.3284	25.9038	25.7045	25.9391	4	30.5	29.9324	10			0.244058	1.16489	Q9Y3U8;J3QSB5;J3KTD3	Q9Y3U8;J3QSB5	60S ribosomal protein L36	RPL36
20.6532	21.5611	20.3328	21.9629	22.0461	21.9199	4	3.4	24.8447	4			1.41939	1.12725	F1T0I1;J3KNL6;O15027;A0A0C4DH09;X6RGP5;Q8N9G1	F1T0I1;J3KNL6;O15027;A0A0C4DH09;X6RGP5	Protein transport protein Sec16A	SEC16A
22.5154	21.2716	20.0647	22.4966	22.1712	22.5606	5	9	25.7239	14			0.716972	1.12557	H3BVG0;Q8N1F7;H3BNN5;H3BRI8;H3BM93;H3BMX0;H3BV11;H3BP95;H3BPA9;H3BNG7	H3BVG0;Q8N1F7;H3BNN5;H3BRI8;H3BM93	Nuclear pore complex protein Nup93	NUP93
21.3504	21.4565	21.8601	22.7929	22.2753	22.9122	2	13.1	25.2308	3			1.94036	1.1045	E9PKA7;E9PI08;Q9Y256	E9PKA7;E9PI08;Q9Y256	CAAX prenyl protease 2	RCE1
21.3582	20.4622	21.6866	22.1499	22.3951	22.2398	5	10.5	25.8451	12			1.36862	1.09259	P51659;E7EWE5;E7ER27;E7EPL9;G5E9S2;E7ET17	P51659;E7EWE5;E7ER27	Peroxisomal multifunctional enzyme type 2;(3R)-hydroxyacyl-CoA dehydrogenase;Enoyl-CoA hydratase 2	HSD17B4
26.3012	26.2778	26.5843	27.3728	27.4225	27.5508	21	19.8	30.7118	84			3.16134	1.06093	H9KV28;A0A0G2JH68;O60610;B4E2I7	H9KV28;A0A0G2JH68;O60610	Protein diaphanous homolog 1	DIAPH1
19.8753	20.4633	20.4082	21.8663	20.7738	21.1976	3	3.6	23.8157	7			1.30747	1.03033	A0A024RCR6;A0A0G2JK23;P46379;H0Y710;A0A0G2JL47;H0Y4L1	A0A024RCR6;A0A0G2JK23;P46379;H0Y710;A0A0G2JL47	Large proline-rich protein BAG6	BAT3;BAG6
20.3555	19.718	20.8499	21.0526	21.3514	21.568	3	20.4	24.918	10			1.32117	1.0162	P84095	P84095	Rho-related GTP-binding protein RhoG	RHOG
21.3692	23.0818	20.5979	22.7029	22.2233	23.1493	2	10.6	26.3726	10			0.574933	1.00889	A0A087X1Z3;Q9UL46;H0YKU2;H0YM70	A0A087X1Z3;Q9UL46;H0YKU2;H0YM70	Proteasome activator complex subunit 2	PSME2
22.3332	21.443	21.4432	22.932	22.2628	23.0235	3	11.8	25.9909	13			1.23083	0.999643	A0A0A6YYC3;A0A0A6YYJ8;Q9Y383	A0A0A6YYC3;A0A0A6YYJ8;Q9Y383	Putative RNA-binding protein Luc7-like 2	C7orf55-LUC7L2;LUC7L2
20.4938	20.5358	20.7999	21.2737	21.6286	21.8753	2	7.4	25.3357	7			2.10535	0.982712	A0A0G2JN66;A0A087WZV8;A0A0J9YYE9;A0A0G2JMB4;A0A075B6S1;A0A0G2JPF7;A0A0G2JM62;A0A0G2JMA8;A0A0G2JP24;A0A0G2JMG7;A0A0G2JNG9;P01850;A0A5B9	A0A0G2JN66;A0A087WZV8;A0A0J9YYE9;A0A0G2JMB4;A0A075B6S1;A0A0G2JPF7;A0A0G2JM62;A0A0G2JMA8;A0A0G2JP24;A0A0G2JMG7;A0A0G2JNG9;P01850;A0A5B9	T-cell receptor beta-1 chain C region;T-cell receptor beta-2 chain C region	TRBV28;TRBC2;TRBC1
27.9717	26.62	26.5562	28.4079	27.3503	28.2661	9	38.3	31.3628	46			0.77776	0.958799	D3YTB1;F8W727;P62910	D3YTB1;F8W727;P62910	60S ribosomal protein L32	RPL32
21.0749	24.1077	23.1673	23.4094	24.5455	23.1708	3	7	27.823	12			0.394076	0.925283	E9PKP7;P17480;E9PLT2	E9PKP7;P17480	Nucleolar transcription factor 1	UBTF
23.1066	22.3191	23.1358	24.3418	22.9425	23.9767	5	15.3	27.079	20			0.839974	0.899834	J3KPP4;O95232;D6RDI2;D6RHH0;H7C5U7;U3KQT3;C9JL41	J3KPP4;O95232;D6RDI2	Luc7-like protein 3	LUC7L3
24.6349	22.9641	21.8211	24.8905	23.7047	23.4917	4	34.5	27.399	13			0.407512	0.888933	Q04837;A0A0G2JLD8;E7EUY5;C9K0U8	Q04837;A0A0G2JLD8;E7EUY5;C9K0U8	Single-stranded DNA-binding protein, mitochondrial	SSBP1
26.5963	25.4423	25.1842	26.9479	25.7715	27.0717	30	34.3	29.799	64			0.644255	0.856099	A0A0C4DG89;D6RJA6;H0Y9U3	A0A0C4DG89		DDX46
21.3517	23.0584	22.3258	22.9238	23.3875	22.9642	3	10.4	26.7103	5			0.75377	0.846549	F6WQW2;P43487;C9JXG8;C9JJ34;C9JDM3;C9JIC6;Q5T0Z6;C9JGV6;Q9C010	F6WQW2;P43487;C9JXG8;C9JJ34;C9JDM3	Ran-specific GTPase-activating protein	RANBP1
21.3764	21.2539	20.7584	21.5983	21.8405	22.4029	3	11.2	24.919	7			1.26166	0.817642	Q14318;U3KQI1;A0A0A0MTJ1;U3KQ64;M0R2K9	Q14318;U3KQI1;A0A0A0MTJ1	Peptidyl-prolyl cis-trans isomerase FKBP8	FKBP8
21.0712	20.9942	20.6838	21.3549	21.7109	22.0607	4	4.6	24.7173	12			1.54922	0.792415	Q7Z3K3	Q7Z3K3	Pogo transposable element with ZNF domain	POGZ
25.6516	25.2689	25.5731	26.9216	24.9239	26.9888	3	36.6	29.7722	22			0.495217	0.780234	J3QS39;J3QTR3;F5H6Q2;F5GYU3;F5H2Z3;F5H265;B4DV12;F5H388;F5H747;F5GXK7;J3QKN0;Q5PY61;Q96C32;P62987;P62979;P0CG47;P0CG48;M0R1V7;M0R1M6;M0R2S1;J3QSA3;F5GZ39	J3QS39;J3QTR3;F5H6Q2;F5GYU3;F5H2Z3;F5H265;B4DV12;F5H388;F5H747;F5GXK7;J3QKN0;Q5PY61;Q96C32;P62987;P62979;P0CG47;P0CG48;M0R1V7;M0R1M6;M0R2S1	Ubiquitin-60S ribosomal protein L40;Ubiquitin;60S ribosomal protein L40;Ubiquitin-40S ribosomal protein S27a;Ubiquitin;40S ribosomal protein S27a;Polyubiquitin-B;Ubiquitin;Polyubiquitin-C;Ubiquitin	UBB;RPS27A;UBC;UBA52
20.7397	20.3913	21.0724	21.1446	21.6584	21.6589	4	6.5	24.7968	6			1.34947	0.752832	P49756;H0YE46;E9PQU5	P49756;H0YE46;E9PQU5	RNA-binding protein 25	RBM25
23.8611	23.0675	23.8174	24.8991	23.9966	24.0866	5	47.3	27.8146	30			0.901771	0.745433	P52566;F5H6Q0;F5H3P3;F5H2R5;H0YGX7	P52566;F5H6Q0;F5H3P3;F5H2R5;H0YGX7	Rho GDP-dissociation inhibitor 2	ARHGDIB
22.2478	22.0893	22.5079	23.2671	22.1946	23.5663	8	15.5	26.6112	24			0.772459	0.727666	Q15459;F8WC79;F8WB66;H7C1L2	Q15459	Splicing factor 3A subunit 1	SF3A1
20.5751	21.6269	21.1569	21.8262	21.7716	21.9361	4	9.7	24.7347	6			1.10683	0.72499	P00367;P49448	P00367;P49448	Glutamate dehydrogenase 1, mitochondrial;Glutamate dehydrogenase 2, mitochondrial	GLUD1;GLUD2
21.0148	21.4769	21.0036	21.686	21.6328	22.3485	3	17.1	24.9842	3			1.2232	0.723988	P62269;A0A0G2JQH2;Q5GGW2;J3JS69	P62269	40S ribosomal protein S18	RPS18
24.1255	23.5607	23.9108	24.6425	24.4055	24.7191	6	19.2	28.154	14			1.72349	0.723367	P37268;E9PNM1;E9PJG4;E9PS69	P37268;E9PNM1;E9PJG4;E9PS69	Squalene synthase	FDFT1
24.349	23.2901	23.5932	24.7277	23.9449	24.6517	7	22.7	27.8498	22			0.802804	0.697332	G3XAC6;Q14498;A0A0U1RQH7;H0Y4X3;A0A0U1RQW2;Q5QP23;Q5QP22;F8WF24;F2Z3E6;F2Z2Z5;A0A087X122;F8WF73;A8MYG5;G3V5Z6;H0YJJ3;G3XAP0;Q86U06	G3XAC6;Q14498;A0A0U1RQH7;H0Y4X3;A0A0U1RQW2	RNA-binding protein 39	RBM39
20.7245	20.6882	21.4204	21.3613	22.0965	21.461	2	6.9	24.9311	10			0.983627	0.695263	P07954	P07954	Fumarate hydratase, mitochondrial	FH
25.5685	25.4158	25.0878	25.8299	26.1068	26.2192	13	30.7	29.5538	70			1.71721	0.6946	A0A087WTP3;Q92945;M0R0I5;M0QYH3;M0QXW7;M0QYG1;M0R0C6;M0R3J3;M0R251;M0R263	A0A087WTP3;Q92945	Far upstream element-binding protein 2	KHSRP
22.2221	21.0132	21.7004	21.8526	22.6499	22.4772	4	25.6	25.8189	8			0.7335	0.681333	P51149;C9J4S4;C9J4V0;C9J8S3;C9J592;C9J7D1;C9IZZ0	P51149;C9J4S4;C9J4V0;C9J8S3;C9J592	Ras-related protein Rab-7a	RAB7A
22.4579	20.9431	21.2696	23.2876	21.0434	22.3818	2	17.7	25.581	9			0.354884	0.680729	A0A087WYT3;Q15185;B4DDC6	A0A087WYT3;Q15185;B4DDC6	Prostaglandin E synthase 3	PTGES3
24.4147	24.6975	24.6554	25.1104	25.4216	25.2767	18	10.9	28.8439	45			2.24624	0.680367	Q14008;H0YDX5;H0YCF6;H0YEK7	Q14008	Cytoskeleton-associated protein 5	CKAP5
24.1978	24.716	24.1735	25.2002	24.8295	25.066	19	8.6	28.5326	42			1.49387	0.669467	P49792;J3KQ37;Q99666;O14715;F8VYC4;P0DJD0;P0DJD1;F8W705;H0YBN8;C9J6W1	P49792	E3 SUMO-protein ligase RanBP2	RANBP2
26.2415	25.8902	24.8219	26.7157	26.2008	26.0388	7	24.7	29.7844	21			0.635847	0.667233	A0A024R4M0;P46781;B5MCT8;C9JM19;F2Z3C0;A8MXK4	A0A024R4M0;P46781;B5MCT8;C9JM19	40S ribosomal protein S9	RPS9
20.7311	22.6882	22.5341	21.9317	22.4399	23.4713	7	5.5	26.3601	13			0.335614	0.629828	Q9HBD4;A0A0A0MT49;P51532;K7EP28;P51531;A0A0U1RRF5;A0A0U1RRD6;A0A0U1RRF8;A0A0A0MSS5;F6UH26;A0A0U1RQU0;A0A0U1RR09;F6XE55;A0A0U1RQE1;A0A0U1RQW7;A0A0U1RRN2;B1ALG1;A0A0U1RR83;A0A0U1RQX3;F6T8Q0;B1ALG2;A0A0U1RR26;A0A0U1RRG6;B4DNT1;B1ALF6;A0A0U1RQZ9;F6VDE0	Q9HBD4;A0A0A0MT49;P51532	Transcription activator BRG1	SMARCA4
23.7939	23.8842	23.9564	24.4914	24.3769	24.5272	7	28.5	28.1977	19			3.07173	0.587001	Q06323;H0YKK6;H0YLU2	Q06323	Proteasome activator complex subunit 1	PSME1
24.63	24.139	24.5691	24.8252	24.9457	25.3042	13	23.1	28.6298	47			1.28593	0.579	Q16666;H3BM18;X6RHM1;A0A0A0MRB1;H3BVE6;X6RHR0;H3BR88;Q6K0P9;H3BR65	Q16666	Gamma-interferon-inducible protein 16	IFI16
22.1655	21.0998	23.3391	23.1021	22.7308	22.4202	5	12	27.1623	16			0.335465	0.549565	A0A0D9SFB3;A0A0D9SG12;A0A0D9SF53;O00571;O15523;A0A0J9YVQ7;A0A0J9YYH6;C9J8G5;C9J081	A0A0D9SFB3;A0A0D9SG12;A0A0D9SF53;O00571;O15523	ATP-dependent RNA helicase DDX3X;ATP-dependent RNA helicase DDX3Y	DDX3X;DDX3Y
20.8967	21.6626	20.9054	21.312	22.1505	21.6397	11	9.9	25.4699	14			0.707763	0.545856	A0A0C4DGZ0;P24928;A0A087WWE2	A0A0C4DGZ0;P24928;A0A087WWE2	DNA-directed RNA polymerase;DNA-directed RNA polymerase II subunit RPB1	POLR2A
23.4076	23.0802	22.8109	23.546	23.8375	23.5486	13	13.3	27.0747	26			1.29045	0.544466	Q15021;E7EN77;F5GZK7;F5H431	Q15021	Condensin complex subunit 1	NCAPD2
22.4009	22.7245	22.7169	23.1348	23.233	23.0964	3	11.4	26.7269	13			2.04318	0.540633	P51991;H7C1J8	P51991	Heterogeneous nuclear ribonucleoprotein A3	HNRNPA3
24.7836	25.013	24.2617	25.3256	24.9411	25.3533	6	22.9	28.6651	23			0.939804	0.520566	P22626;A0A087WUI2	P22626;A0A087WUI2	Heterogeneous nuclear ribonucleoproteins A2/B1	HNRNPA2B1
24.1856	23.6915	23.0048	24.7498	22.9329	24.7031	3	32.5	27.5813	11			0.294804	0.5013	A0A0B4J220;E9PLD3;E9PRG8	A0A0B4J220		C11orf98
20.4484	20.8464	20.6484	21.8075	20.664	20.956	3	3.3	24.1691	8			0.613998	0.494739	O95239;Q2VIQ3	O95239	Chromosome-associated kinesin KIF4A	KIF4A
21.4304	21.5171	20.9212	22.0147	21.4806	21.8498	5	9	25.1645	12			0.943995	0.492128	F5GZS6;J3KPF3;P08195;F5H0E2;H0YFS2;H0YFX4;F5GZI0	F5GZS6;J3KPF3;P08195	4F2 cell-surface antigen heavy chain	SLC3A2
23.9781	23.6165	22.9936	24.2804	23.901	23.8484	5	17.5	27.535	22			0.687402	0.480532	Q9Y266;A0A0A0MSS4;A0A0A0MSU9	Q9Y266	Nuclear migration protein nudC	NUDC
26.7443	26.8792	26.3919	27.2471	27.272	26.8841	13	34.4	30.6266	61			1.13382	0.4626	J3KTA4;P17844;J3QSF1;J3KRZ1;J3QRQ7;J3KRX8;X6RLV5;J3QR02;J3QRN5	J3KTA4;P17844	Probable ATP-dependent RNA helicase DDX5	DDX5
26.7339	26.4569	25.5028	27.1729	26.0498	26.8447	3	14.7	30.2884	20			0.385392	0.457933	P26373;J3QSB4;H3BTH3	P26373;J3QSB4	60S ribosomal protein L13	RPL13
25.1865	25.5117	24.6984	24.6453	26.2838	25.8402	7	34	29.3648	28			0.349549	0.457567	Q15365	Q15365	Poly(rC)-binding protein 1	PCBP1
25.0492	24.6129	24.1914	25.0326	24.7537	25.4168	9	35.4	28.5861	25			0.64859	0.449867	H0YH81;P06576;F8W079;F8W0P7;H0YI37	H0YH81;P06576;F8W079	ATP synthase subunit beta;ATP synthase subunit beta, mitochondrial	ATP5B
24.6337	24.8201	24.3184	24.9282	25.2123	24.9744	6	46.4	28.5997	20			1.23059	0.447566	P23528;G3V1A4;E9PP50;E9PK25;E9PLJ3;E9PS23;E9PQB7;Q9Y281	P23528;G3V1A4;E9PP50;E9PK25;E9PLJ3;E9PS23;E9PQB7	Cofilin-1	CFL1
24.5129	23.3572	23.5638	24.5628	24.2841	23.9224	7	17.4	28.0195	21			0.482208	0.445133	P52292;J3QLL0;J3KS65	P52292	Importin subunit alpha-1	KPNA2
24.5092	24.2776	25.1805	25.2743	25.0878	24.9233	16	26.5	28.6761	39			0.692046	0.439367	P25205;J3KQ69;Q7Z6P5	P25205;J3KQ69	DNA replication licensing factor MCM3	MCM3
24.9993	25.4588	25.8561	25.4699	25.9749	26.1617	9	15.5	29.6131	31			0.597698	0.430766	A0A0R4J2E8;A8MXP9;P43243;D6REM6;D6R991;H0Y8T4;B3KM87;D6RAM9;D6RAY2;D6RBI2;D6RBK5;D6RE02;D6RIA2;Q68E03	A0A0R4J2E8;A8MXP9;P43243;D6REM6;D6R991	Matrin-3	MATR3
24.4207	24.2176	23.963	24.8627	24.3763	24.6373	14	14.5	28.0869	34			1.03368	0.425001	Q14152	Q14152	Eukaryotic translation initiation factor 3 subunit A	EIF3A
23.9988	23.9182	24.3481	24.1587	24.4242	24.9507	12	27	28.3564	23			0.723215	0.422834	P40939;H0YFD6	P40939	Trifunctional enzyme subunit alpha, mitochondrial;Long-chain enoyl-CoA hydratase;Long chain 3-hydroxyacyl-CoA dehydrogenase	HADHA
21.1747	21.3571	21.5254	22.2969	21.0681	21.8589	3	3.1	24.738	8			0.447781	0.388893	Q9UKJ3	Q9UKJ3	G patch domain-containing protein 8	GPATCH8
25.6688	24.9209	24.4972	25.4817	25.6304	25.1232	10	40.8	29.1874	31			0.43883	0.3828	P40926;G3XAL0	P40926;G3XAL0	Malate dehydrogenase, mitochondrial;Malate dehydrogenase	MDH2
22.056	21.4858	20.6108	21.9023	21.584	21.8121	7	5.5	24.5606	8			0.371224	0.381946	Q08378;A0A087WV43	Q08378	Golgin subfamily A member 3	GOLGA3
22.9662	22.5063	22.46	22.8593	23.0075	23.207	7	11.5	26.6613	17			0.934144	0.380434	A0A087WZZ5;E9PPJ0;Q13435;E9PJ04;H0YCG1;E9PJT3;H0YEX5;E9PIL8	A0A087WZZ5;E9PPJ0;Q13435	Splicing factor 3B subunit 2	SF3B2
25.285	25.186	25.293	25.688	25.6031	25.5904	21	25.6	29.2353	69			2.89563	0.3725	O00410;H0Y8C6;E7ETV3;E7EWK4;E7EX05;E7EQT5;E7EV12;C9JMV5;H0Y3V4;C9JXE0;C9JZD8;C9J875;C9JZ53;C9JQT6;E7ESA1;E7ESZ1;E7ETV8;O60518	O00410;H0Y8C6	Importin-5	IPO5
24.4285	23.9929	23.0886	24.3222	24.4278	23.8657	10	16.4	27.7303	27			0.356221	0.368567	P02786;G3V0E5;F8WBE5;H7C3V5	P02786;G3V0E5	Transferrin receptor protein 1;Transferrin receptor protein 1, serum form	TFRC
23.9223	23.8814	23.8299	24.4482	24.0245	24.2466	5	34.8	27.7498	14			1.35082	0.3619	Q5T7C4;P09429;B2RPK0	Q5T7C4;P09429;B2RPK0	High mobility group protein B1;Putative high mobility group protein B1-like 1	HMGB1;HMGB1P1
25.5667	25.3428	24.6564	25.5588	24.8768	26.1937	6	17.8	29.029	20			0.30849	0.354467	P08621;M0QYR1	P08621;M0QYR1	U1 small nuclear ribonucleoprotein 70 kDa	SNRNP70
25.2066	25.2428	25.4153	25.5883	25.5383	25.799	27	26.8	29.2785	77			1.58282	0.353633	O75533;H7C341	O75533	Splicing factor 3B subunit 1	SF3B1
22.7578	22.069	21.7733	23.1127	22.0124	22.5337	7	43.5	26.1544	21			0.338002	0.3529	P67809;H0Y449;A0A087X1S2;C9J5V9;A0A0D9SEI8;Q9Y2T7;P16989	P67809;H0Y449;A0A087X1S2;C9J5V9	Nuclease-sensitive element-binding protein 1	YBX1
23.7337	23.4485	23.4218	23.4399	24.0722	24.1482	7	29.3	27.5017	23			0.647577	0.3521	P27797;K7EJB9;K7EL50	P27797;K7EJB9	Calreticulin	CALR
21.4034	21.6996	21.1326	21.6568	21.848	21.7515	4	9.6	25.5487	5			0.919773	0.340233	P24752;H0YEL7;E9PRQ6	P24752;H0YEL7	Acetyl-CoA acetyltransferase, mitochondrial	ACAT1
28.4494	28.6799	29.1039	28.9178	28.8937	29.4359	26	58.7	32.8227	139			0.577396	0.338067	P13796;Q5TBN3;A0A0A0MSQ0;P13797;Q5TBN5;U3KQI3;C9JAM8	P13796	Plastin-2	LCP1
22.6028	21.4422	22.0834	22.1632	22.5233	22.44	4	13.9	25.9116	8			0.398885	0.332702	P62191	P62191	26S protease regulatory subunit 4	PSMC1
26.8175	26.0227	26.8513	26.7982	26.3315	27.5593	19	37.5	30.5879	85			0.301186	0.3325	P05165;H0Y5U0;Q5JTW6;Q5JVH2	P05165	Propionyl-CoA carboxylase alpha chain, mitochondrial	PCCA
23.9457	22.364	23.1137	23.8859	23.0007	23.5301	3	26.4	26.922	11			0.25031	0.3311	P62899;H7C2W9;C9JU56;B7Z4E3;B7Z4C8;B8ZZK4	P62899;H7C2W9;C9JU56;B7Z4E3;B7Z4C8	60S ribosomal protein L31	RPL31
23.6399	24.0858	24.9006	24.6505	24.4311	24.5344	14	16.2	28.4149	42			0.368449	0.3299	Q9BSJ8;F8VZB1	Q9BSJ8	Extended synaptotagmin-1	ESYT1
20.9877	24.9186	24.5485	24.4138	23.1688	23.8457	12	14.8	28.066	19			0.0884656	0.324501	Q9HAV4;H0Y3Q8;H0Y3W3	Q9HAV4	Exportin-5	XPO5
25.2641	24.4464	24.7943	25.3681	25.2196	24.8715	6	32.2	28.8939	21			0.498015	0.318134	E7EQV9;E7ENU7;P61313;E7EX53	E7EQV9;E7ENU7;P61313	Ribosomal protein L15;60S ribosomal protein L15	RPL15
21.4853	22.8471	22.1005	22.0569	23.2063	22.108	4	13	26.3489	12			0.224814	0.312756	O15355	O15355	Protein phosphatase 1G	PPM1G
26.3235	24.749	25.677	25.7655	26.2651	25.6567	5	37	29.6418	12			0.250947	0.3126	P62937;F8WE65;C9J5S7;E5RIZ5;P0DN26;A0A0H2UH34;A0A0B4J2A2;A0A075B767;A0A075B759;Q9Y536;F5H284	P62937;F8WE65;C9J5S7	Peptidyl-prolyl cis-trans isomerase A;Peptidyl-prolyl cis-trans isomerase A, N-terminally processed;Peptidyl-prolyl cis-trans isomerase	PPIA
30.0299	28.8695	29.5075	29.9207	29.6013	29.7917	73	43.8	33.3859	338			0.36228	0.302267	Q13085;Q59FY4;A0A0C4DGT1;A0A087X0W4;A0A087X2F8;A0A087X126;S4R3S7;A0A087WWN5;A0A087WYK6;A0A087WVR6;A0A087WYS8	Q13085	Acetyl-CoA carboxylase 1;Biotin carboxylase	ACACA
26.471	26.3492	25.7975	26.5538	26.4521	26.4788	21	53.9	30.187	88			0.6203	0.289	P50395;Q5SX87;V9GYF8;Q5SX90;V9GYJ7;Q5SX86;Q5SX91;G5E9U5	P50395	Rab GDP dissociation inhibitor beta	GDI2
25.7925	26.1208	26.2234	26.0721	26.4633	26.4558	35	29.4	30.0464	110			0.709901	0.284833	P46940;A0A0J9YXZ5;H0YLE8;H0YKA5;A0A087WWP1;A0A087X225;E9PDT6;F2Z2E2;Q86VI3	P46940;A0A0J9YXZ5;H0YLE8	Ras GTPase-activating-like protein IQGAP1	IQGAP1
25.7128	25.1488	25.5475	25.7334	25.6918	25.7765	28	17.4	29.4684	50			0.713588	0.2642	Q92608;E5RFJ0;E7ERW7;F6S220;H0YB76	Q92608;E5RFJ0;E7ERW7	Dedicator of cytokinesis protein 2	DOCK2
25.004	25.2552	25.3122	25.1217	25.4997	25.7317	14	32.6	29.1845	41			0.576099	0.260567	A0A087X0X3;P52272;M0QZM1;M0R2I7;M0R0N3;M0R019;M0QY96;M0R2T0;M0R0Y6;M0QYQ7;M0QYL3	A0A087X0X3;P52272	Heterogeneous nuclear ribonucleoprotein M	HNRNPM
25.0546	24.7689	24.5031	24.8683	25.2265	25.0086	20	11.5	28.689	65			0.610379	0.258933	P11717;S4R328	P11717	Cation-independent mannose-6-phosphate receptor	IGF2R
23.0567	24.4787	23.9186	24.0261	24.6073	23.5916	7	16.9	27.955	18			0.194335	0.257	P27694;I3L4R8;I3L524;I3L2M5	P27694;I3L4R8	Replication protein A 70 kDa DNA-binding subunit;Replication protein A 70 kDa DNA-binding subunit, N-terminally processed	RPA1
24.0228	24.5613	23.328	24.1614	24.2691	24.2257	13	17.7	27.9416	41			0.27826	0.248034	H0Y3P2;D3DQV9;P78344;H0YCH5;H0YD77;E9PKF8;H0YEC5;H0YE22	H0Y3P2;D3DQV9;P78344;H0YCH5	Eukaryotic translation initiation factor 4 gamma 2	EIF4G2
22.7121	23.5359	22.8238	23.1196	23.4817	23.2115	9	10.3	27.1174	23			0.369107	0.247001	O60264;A0A0A0MRP6;B7ZLQ5;P28370	O60264	SWI/SNF-related matrix-associated actin-dependent regulator of chromatin subfamily A member 5	SMARCA5
20.9444	20.7653	21.4174	21.2663	21.528	21.0737	6	10.2	25.0863	12			0.453003	0.246966	Q9BZF1;F8VUA7;F8VQX7;F8VVD3;F8VVE7;F8VZ43	Q9BZF1;F8VUA7;F8VQX7	Oxysterol-binding protein-related protein 8;Oxysterol-binding protein	OSBPL8
24.1697	24.4672	25.0646	25.0359	24.296	25.1027	12	16.5	28.4907	24			0.264504	0.244366	V9GYM8;Q92974;V9GYF0;Q5VY93;V9GZ14;V9GYF5;V9GYG5	V9GYM8;Q92974	Rho guanine nucleotide exchange factor 2	ARHGEF2
23.5893	23.9208	23.4235	23.6479	24.1412	23.8638	10	18.5	27.672	20			0.514634	0.239766	O76094;R4GNC1;D6RDY6	O76094;R4GNC1	Signal recognition particle subunit SRP72	SRP72
25.9684	25.8369	25.3542	25.8453	26.1707	25.8523	19	24.3	29.6147	57			0.47597	0.236267	P55060	P55060	Exportin-2	CSE1L
26.6186	26.099	26.7704	26.402	26.8647	26.9179	46	32.3	30.4582	139			0.37259	0.2322	Q5HY54;Q60FE5;P21333;A0A087WWY3;F8WE98;H0Y5C6;H0Y5F3;H7C2E7	Q5HY54;Q60FE5;P21333;A0A087WWY3	Filamin-A	FLNA
26.655	25.8334	26.4644	26.5312	26.4759	26.6179	12	26.4	30.3228	65			0.373006	0.224067	P08133;E7EMC6;E5RI05;E5RJF5;E5RK63	P08133;E7EMC6	Annexin A6;Annexin	ANXA6
21.4431	21.7907	21.5625	21.8299	22.0367	21.5813	3	16.2	25.6488	19			0.581531	0.2172	O00148;K7EQN7;K7EPJ3;A0A0D9SEM9;K7EN69;F6QYI9;A0A0G2JJL7;F6R6M7	O00148;K7EQN7;K7EPJ3	ATP-dependent RNA helicase DDX39A	DDX39A
25.0935	24.7404	24.4772	24.893	25.0553	25.0008	12	18	28.5328	27			0.503168	0.212666	P19338;H7BY16	P19338;H7BY16	Nucleolin	NCL
23.0132	23.8013	22.7689	23.638	22.8796	23.7017	3	12.1	27.0675	13			0.199893	0.211967	Q07021;I3L3Q7;I3L3B0	Q07021	Complement component 1 Q subcomponent-binding protein, mitochondrial	C1QBP
24.7632	25.2898	25.3786	24.8871	25.6666	25.5047	14	23.1	29.2928	42			0.274489	0.208933	Q14566	Q14566	DNA replication licensing factor MCM6	MCM6
23.8656	23.3204	23.3695	23.6138	23.5083	24.0529	10	23.1	27.3851	34			0.356549	0.2065	P13667	P13667	Protein disulfide-isomerase A4	PDIA4
22.5236	23.294	23.3102	23.2936	23.2631	23.1704	8	25.7	26.9235	23			0.311107	0.199767	Q13867;K7ESE8;J3KSD8;K7ES02;J3KS79;K7ENH5	Q13867;K7ESE8;J3KSD8;K7ES02	Bleomycin hydrolase	BLMH
23.3054	23.5168	23.3226	23.3015	23.603	23.8295	6	35	27.3523	17			0.514998	0.1964	P52907;C9JUG7;F8W9N7;A0A0D9SET8	P52907	F-actin-capping protein subunit alpha-1	CAPZA1
23.8367	23.8289	23.327	24.0347	23.9547	23.5781	6	19.6	27.5701	17			0.364301	0.191634	Q00534	Q00534	Cyclin-dependent kinase 6	CDK6
21.4337	22.288	21.7101	22.3968	22.1737	21.4337	2	1.9	24.7028	6			0.189739	0.19078	O15118;K7EQ23	O15118;K7EQ23	Niemann-Pick C1 protein	NPC1
22.8416	23.1441	22.9169	23.1656	22.9948	23.3105	7	22.3	26.7619	15			0.6669	0.189433	P05455;E7ERC4;E9PGX9;E9PFL9	P05455;E7ERC4;E9PGX9	Lupus La protein	SSB
24.6024	24.8465	24.896	24.7964	24.9012	25.2139	13	17.1	28.6621	39			0.538445	0.188866	P06400	P06400	Retinoblastoma-associated protein	RB1
23.4134	23.0706	23.4615	23.3259	23.5399	23.6318	13	9.9	27.2593	20			0.530301	0.184032	Q8TEM1	Q8TEM1	Nuclear pore membrane glycoprotein 210	NUP210
28.8471	28.3753	28.9084	28.9486	28.676	29.0567	30	38	32.5536	160			0.379801	0.183501	P11498;E9PRE7;E9PS68	P11498	Pyruvate carboxylase, mitochondrial	PC
24.3176	25.0272	24.7342	25.6121	24.9968	24.0174	4	33.8	28.5213	22			0.132165	0.182433	H0YHC3;F8W020;F8W118;F8VXI6;F8VUX1;F8VY35;F8VV59;B7Z9C2;F8W0J6;F5H4R6;H0YIV4;P55209;H0YH88;F8W543;F8VRJ2;F8VVB5	H0YHC3;F8W020;F8W118;F8VXI6;F8VUX1;F8VY35;F8VV59;B7Z9C2;F8W0J6;F5H4R6;H0YIV4;P55209;H0YH88;F8W543;F8VRJ2	Nucleosome assembly protein 1-like 1	NAP1L1
26.8748	26.3321	25.9877	26.7819	26.2173	26.7366	20	39.8	30.0924	68			0.223337	0.180401	Q06210;O94808	Q06210	Glutamine--fructose-6-phosphate aminotransferase [isomerizing] 1	GFPT1
23.957	24.5183	24.3135	24.2814	24.4902	24.5565	13	16.7	28.1416	36			0.416448	0.179767	P19174;V9GY71;V9GYH5;A0A0D9SEK2;V9GY63	P19174	1-phosphatidylinositol 4,5-bisphosphate phosphodiesterase gamma-1	PLCG1
26.3346	26.4471	26.2511	26.496	26.7167	26.3486	10	42.9	30.1861	39			0.658691	0.176167	J3KPS3;P04075;H3BQN4;H3BUH7;H3BR04;H3BPS8;H3BMQ8;H3BU78;H3BR68	J3KPS3;P04075;H3BQN4;H3BUH7;H3BR04;H3BPS8;H3BMQ8;H3BU78	Fructose-bisphosphate aldolase;Fructose-bisphosphate aldolase A	ALDOA
26.9444	27.0051	26.936	27.446	26.5679	27.3642	19	42.2	30.8296	65			0.228967	0.164199	Q96RQ3;E9PHF7;F5GYT8;E9PG35;G5E9X5	Q96RQ3;E9PHF7;F5GYT8;E9PG35;G5E9X5	Methylcrotonoyl-CoA carboxylase subunit alpha, mitochondrial	MCCC1
23.8952	24.0177	24.0285	23.9525	24.3958	24.08	7	23.8	27.8244	18			0.513761	0.162299	A0A0G2JJZ9;Q5STU3;Q13838;F6WLT2;F6S4E6;A0A0A0MT12;F6TRA5;F6UJC5;H0YCC6;H0Y400	A0A0G2JJZ9;Q5STU3;Q13838;F6WLT2;F6S4E6;A0A0A0MT12;F6TRA5;F6UJC5	Spliceosome RNA helicase DDX39B	DDX39B
24.5443	24.6224	24.7728	24.7483	24.8271	24.8409	5	34.4	28.5788	18			1.02216	0.158934	F8W7C6	F8W7C6		RPL10
25.4195	25.6644	25.2849	25.9145	25.587	25.3434	12	23.6	29.2624	35			0.32751	0.158699	P23246;H0Y9K7;H0Y9U2	P23246	Splicing factor, proline- and glutamine-rich	SFPQ
22.6285	23.1108	23.1012	23.0543	23.1634	23.0902	7	20.8	27.0795	16			0.407056	0.155801	Q15233;C9JYS8;C9IZL7;C9J4X2;H7C367;C9JJ13	Q15233;C9JYS8;C9IZL7	Non-POU domain-containing octamer-binding protein	NONO
22.661	23.7699	23.0896	24.0663	23.3193	22.5838	2	14.7	27.0197	11			0.100186	0.149633	P24534;F8WF65;F2Z2G2;C9JZW3	P24534;F8WF65;F2Z2G2;C9JZW3	Elongation factor 1-beta	EEF1B2
23.2932	22.9136	23.312	23.3534	23.3434	23.2704	13	13.8	27.0685	24			0.492105	0.149466	E9PF10;O75694	E9PF10;O75694	Nuclear pore complex protein Nup155	NUP155
22.4371	22.3641	22.5109	22.3946	22.6307	22.7112	2	7.5	26.2562	6			0.610022	0.141467	H7BY36;A0A0D9SFL3;B0QYK0;C9JGE3;Q01844	H7BY36;A0A0D9SFL3;B0QYK0;C9JGE3;Q01844	RNA-binding protein EWS	EWSR1
23.5876	23.8517	23.3013	23.9	23.5939	23.6503	9	23.8	27.3699	24			0.295271	0.134533	Q573B4;P06239;E9PJ92;E9PAP0;F8W6B9;E9PKQ8;P12931;P06241	Q573B4;P06239;E9PJ92;E9PAP0	Non-specific protein-tyrosine kinase;Tyrosine-protein kinase Lck	LCK
23.6909	22.4895	22.204	22.8309	22.8501	23.0964	5	21.4	26.6407	11			0.101555	0.130999	Q16543;K7EQA9;K7EL68;K7EKQ2;K7EIU0	Q16543;K7EQA9	Hsp90 co-chaperone Cdc37;Hsp90 co-chaperone Cdc37, N-terminally processed	CDC37
24.1601	24.379	23.7444	24.2383	24.4498	23.9821	6	20.6	27.9021	25			0.218136	0.1289	Q9UQ80;F8VR77;H0YIN7;F8W0A3	Q9UQ80;F8VR77	Proliferation-associated protein 2G4	PA2G4
22.4988	22.2627	21.8986	22.2026	22.2526	22.5845	3	7.6	25.9488	10			0.234849	0.126535	A0A087X1B2;B9A018;Q53GS9	A0A087X1B2;B9A018;Q53GS9	U4/U6.U5 tri-snRNP-associated protein 2	USP39
23.3676	22.2769	22.9434	22.7894	22.8161	23.3617	8	36.7	26.7264	23			0.125767	0.126434	P04083;Q5T3N1;Q5T3N0	P04083;Q5T3N1;Q5T3N0	Annexin A1;Annexin	ANXA1
23.7919	23.5151	23.7831	23.9292	23.7955	23.7342	6	14	27.4975	17			0.499265	0.122932	A0A0A0MTS2;P06744;K7EQ48;A0A0J9YXP8;A0A0J9YX90;A0A0J9YYH3;K7EPY4;K7EP41;K7ENA0;CON__Q3ZBD7;K7EIL4;K7ERK8;K7ELR7;K7ERC6;K7ESF4	A0A0A0MTS2;P06744;K7EQ48;A0A0J9YXP8;A0A0J9YX90;A0A0J9YYH3;K7EPY4	Glucose-6-phosphate isomerase	GPI
23.4545	24.2096	23.8224	23.5805	23.97	24.3009	11	15.1	27.7858	24			0.150446	0.121633	G5EA31;P53992;A0A0U1RR49	G5EA31;P53992	Protein transport protein Sec24C	SEC24C
26.7991	26.8547	27.0154	26.7071	27.1481	27.1768	17	24.7	30.7575	56			0.29681	0.120933	Q00839;Q5RI18	Q00839	Heterogeneous nuclear ribonucleoprotein U	HNRNPU
24.3767	23.8813	23.9784	24.2611	23.9899	24.3419	12	24.4	27.9908	36			0.254888	0.118834	Q13263;M0R0K9;M0R2I3;M0R3C0	Q13263;M0R0K9	Transcription intermediary factor 1-beta	TRIM28
23.2816	23.2431	23.3521	22.7869	24.0372	23.4008	6	16.3	27.2611	16			0.116433	0.116034	Q9UMS4;F5GY56;H0YGF3;H0YGZ5	Q9UMS4	Pre-mRNA-processing factor 19	PRPF19
22.9787	23.3898	23.3598	23.2774	23.0233	23.7658	3	26.2	27.0363	9			0.16675	0.112733	M0R3D6;M0R1A7;M0R117;Q02543;M0R0P7	M0R3D6;M0R1A7;M0R117;Q02543;M0R0P7	60S ribosomal protein L18a	RPL18A
24.5183	24.0798	23.657	24.0343	24.1738	24.382	6	20.2	28.0033	20			0.155699	0.111667	P37837;F2Z393;E9PM01;E9PKI8	P37837;F2Z393	Transaldolase	TALDO1
22.5056	22.4365	21.7057	22.3648	22.2219	22.3785	4	11.4	26.076	13			0.151386	0.1058	Q9UBM7;H0YE57;E9PJ54;E9PM00	Q9UBM7;H0YE57	7-dehydrocholesterol reductase	DHCR7
26.9313	26.4499	26.9832	26.8664	26.8029	27.0075	54	31.3	30.654	171			0.225947	0.104134	Q01082;A0A087WUZ3;F8W6C1;P11277	Q01082;A0A087WUZ3	Spectrin beta chain, non-erythrocytic 1	SPTBN1
23.8032	24.3987	24.1328	24.2941	24.3964	23.9495	8	22	27.9033	19			0.176362	0.101767	O43390;B4DT28	O43390;B4DT28	Heterogeneous nuclear ribonucleoprotein R	HNRNPR
22.9505	21.3672	22.8152	23.5906	21.3737	22.4642	9	10.7	25.8906	14			0.0410815	0.0985355	Q9BQG0;I3L1L3	Q9BQG0;I3L1L3	Myb-binding protein 1A	MYBBP1A
24.5855	24.5364	24.2036	24.9409	24.3416	24.3363	14	23.3	28.2512	44			0.156596	0.0977669	P14625;Q96GW1;F8W026	P14625;Q96GW1	Endoplasmin	HSP90B1
24.1322	23.9739	23.687	23.828	23.882	24.3651	8	16.1	27.6802	25			0.164797	0.0939999	A0A0A0MRA5;B7Z4B8;Q9BUJ2;M0R3F1;M0QYZ0;M0R203;M0QZV6;M0R0K8;M0QYI8;M0QYM5	A0A0A0MRA5;B7Z4B8;Q9BUJ2;M0R3F1;M0QYZ0	Heterogeneous nuclear ribonucleoprotein U-like protein 1	HNRNPUL1
28.6939	28.4502	28.0221	28.4836	28.6254	28.333	23	48.3	32.2016	110			0.16162	0.0919342	P11142;E9PKE3;E9PNE6;E9PLF4;E9PQQ4;E9PQK7;E9PK54;E9PPY6;E9PI65;A8K7Q2;E9PN25;P54652;E9PS65;E9PM13	P11142;E9PKE3;E9PNE6;E9PLF4	Heat shock cognate 71 kDa protein	HSPA8
23.7544	23.5381	23.9267	23.8705	23.5869	24.0272	16	15.8	27.5868	29			0.199144	0.0884673	X6R433;A0A0A0MT22;P08575;E9PKH0;M3ZCP1;A0A075B788;A0A0G2JNW2	X6R433;A0A0A0MT22;P08575;E9PKH0;M3ZCP1;A0A075B788	Protein-tyrosine-phosphatase;Receptor-type tyrosine-protein phosphatase C	PTPRC
22.9022	23.554	23.9377	23.7553	23.5509	23.3458	10	14.3	27.3379	25			0.094723	0.0860329	E9PDF2;E9PCR7;Q02218;A0A0D9SFS3;E9PFG7;C9J4G7;Q9ULD0	E9PDF2;E9PCR7;Q02218;A0A0D9SFS3;E9PFG7	2-oxoglutarate dehydrogenase, mitochondrial	OGDH
25.2308	24.7914	24.638	25.0859	24.6951	25.1261	8	22.1	28.69	26			0.135121	0.0822996	P39023;G5E9G0;B5MCW2;H7C422;H7C3M2;F8WCR1;Q92901	P39023;G5E9G0;B5MCW2;H7C422;H7C3M2	60S ribosomal protein L3	RPL3
23.0975	23.4009	23.2738	23.2297	23.7329	23.0503	3	13.5	27.0468	20			0.132789	0.0802339	J3QR09;J3KTE4;P84098;J3QL15	J3QR09;J3KTE4;P84098;J3QL15	Ribosomal protein L19;60S ribosomal protein L19	RPL19
25.0445	24.4404	24.4754	24.7687	24.6268	24.7916	12	18.9	28.3497	31			0.137988	0.0755997	Q12906;K7EKJ9;K7ERM6;K7ENK6;K7EM82;K7EJ09;K7ER69;K7EQR9;K7EQ75	Q12906	Interleukin enhancer-binding factor 3	ILF3
24.5683	24.0999	23.2062	24.0586	23.8614	24.175	11	14.3	27.8439	22			0.0623083	0.0735334	Q92900	Q92900	Regulator of nonsense transcripts 1	UPF1
24.076	23.7124	23.6742	24.2696	23.7351	23.6783	9	27	27.6277	22			0.117377	0.0734666	A0A087X1I3;D6RFM5;P31040;H0Y8X1	A0A087X1I3;D6RFM5;P31040	Succinate dehydrogenase [ubiquinone] flavoprotein subunit, mitochondrial	SDHA
22.375	23.5557	23.9015	23.3198	23.025	23.6756	8	15	27.3028	20			0.0428685	0.0627327	Q8N163;H0YB24;G3V119;E5RHJ4;A0A087X2B6	Q8N163;H0YB24;G3V119;E5RHJ4	Cell cycle and apoptosis regulator protein 2	CCAR2
24.1249	24.0236	23.1252	23.9662	23.9006	23.5913	8	32.5	27.5122	24			0.063199	0.0614662	P31689	P31689	DnaJ homolog subfamily A member 1	DNAJA1
21.6858	21.0873	21.5662	21.6501	20.5487	22.3056	5	5.8	23.9872	5			0.0341732	0.0550264	Q13523;H0YDJ3	Q13523;H0YDJ3	Serine/threonine-protein kinase PRP4 homolog	PRPF4B
22.4126	24.5558	23.5893	23.2285	24.1192	23.3677	9	52.7	27.6903	21			0.02596	0.0525672	O00299	O00299	Chloride intracellular channel protein 1	CLIC1
25.7742	26.1848	26.2015	25.9384	25.9932	26.3841	5	55.3	30.0005	39			0.0932294	0.0517337	P68371;P04350;M0R2D3;M0QY85;M0QZL7;M0R278;K7ESM5;A6NNZ2;Q9BUF5;M0R0X0;M0QY37;M0QX14;G3V2A3;M0R042;CON__ENSEMBL:ENSBTAP00000025008;Q9H4B7;M0R1I1;M0R2T4;A0A075B724	P68371;P04350	Tubulin beta-4B chain;Tubulin beta-4A chain	TUBB4B;TUBB4A
25.1414	25.8156	25.9116	25.777	25.4829	25.7433	22	30.3	29.5082	60			0.0599109	0.0448672	O14980;C9JKM9;C9IZS4;C9JQ02;C9JV99;C9J673;C9JF49;C9IYM2;H7BZC5;F8WF71	O14980	Exportin-1	XPO1
22.4065	22.083	22.4873	21.9062	22.6575	22.5445	10	6.1	26.0951	14			0.0572609	0.0438105	A0A0D9SFK2;Q92614;H0YEV9	A0A0D9SFK2;Q92614	Unconventional myosin-XVIIIa	MYO18A
27.8514	27.7626	27.6636	27.6071	28.0241	27.7766	20	49	31.6554	80			0.119197	0.0433992	P10809;E7ESH4;E7EXB4;C9JL25;C9JL19;C9JCQ4;C9J0S9	P10809	60 kDa heat shock protein, mitochondrial	HSPD1
23.9557	24.1222	23.5354	24.4895	23.9893	23.2369	9	21.3	27.531	18			0.0284059	0.0341333	Q01581;D6RIW1;P54868	Q01581	Hydroxymethylglutaryl-CoA synthase, cytoplasmic	HMGCS1
22.1209	22.4004	22.3242	22.025	22.6571	22.2641	9	9.7	26.2881	26			0.0573742	0.0335668	C9J2Y9;P30876;C9J4M6	C9J2Y9;P30876;C9J4M6	DNA-directed RNA polymerase;DNA-directed RNA polymerase II subunit RPB2	POLR2B
22.604	22.7115	21.8659	22.261	22.2683	22.7468	3	26.8	26.1319	12			0.0343564	0.031566	Q04917;A2IDB2	Q04917	14-3-3 protein eta	YWHAH
25.0746	24.9871	25.2018	24.6877	25.1517	25.5031	20	30.4	28.9864	72			0.0365299	0.0263329	P49588;H3BPK7	P49588	Alanine--tRNA ligase, cytoplasmic	AARS
25.2617	25.6113	25.807	25.5335	25.7585	25.4535	23	41.3	29.4857	62			0.0404079	0.0218341	Q01813;B1APP6;B1APP8;H0Y757;Q5VSR5;V9GYV7;V9GY25;H0Y3Y3	Q01813	ATP-dependent 6-phosphofructokinase, platelet type	PFKP
22.8978	23.1421	22.5365	22.5689	23.5132	22.5595	4	8.8	26.6728	9			0.0199956	0.021733	G3V1C3;Q9BZZ5;H0YER7;E9PQK6	G3V1C3;Q9BZZ5;H0YER7	Apoptosis inhibitor 5	API5
23.7987	24.4483	24.0679	23.662	24.6835	24.0242	15	16.6	28.0581	28			0.0171602	0.0182673	P55265;H0YCK3	P55265;H0YCK3	Double-stranded RNA-specific adenosine deaminase	ADAR
24.6652	25.3165	25.0929	24.8712	25.2638	24.9937	6	30	28.7217	14			0.027072	0.018034	B5MDF5;P62826;J3KQE5;F5H018;B4DV51;H0YFC6;A0A087X0W0	B5MDF5;P62826;J3KQE5;F5H018;B4DV51	GTP-binding nuclear protein Ran	RAN
23.2977	23.239	23.4292	22.7774	23.6733	23.5515	17	15.1	27.2356	38			0.0139918	0.0120996	F5GWX5;A0A0C4DGG9;Q14839;Q8TDI0;K7EMY3;F2Z2R5;F5H6N4	F5GWX5;A0A0C4DGG9;Q14839	Chromodomain-helicase-DNA-binding protein 4	CHD4
22.9482	22.8312	22.85	23.1758	22.8538	22.6172	6	8	26.7316	14			0.0115373	0.00580025	Q8WUM0	Q8WUM0	Nuclear pore complex protein Nup133	NUP133
26.6302	26.5958	26.5576	26.4347	26.6087	26.7561	22	42.9	30.3247	84			0.0185059	0.00529989	P12956;B1AHC9	P12956;B1AHC9	X-ray repair cross-complementing protein 6	XRCC6
23.8657	23.1431	23.0546	22.8925	23.6941	23.4919	5	35.8	27.1327	10			0.00468173	0.00503286	B1AH77;B1AH80;P15153;J3KSC4;J3QLK0;B1AH78;P60763	B1AH77;B1AH80;P15153;J3KSC4;J3QLK0;B1AH78;P60763	Ras-related C3 botulinum toxin substrate 2;Ras-related C3 botulinum toxin substrate 3	RAC2;RAC3
29.3278	29.5715	29.7785	29.3846	29.3195	29.9856	16	57.7	33.5199	126			0.00522255	0.00396601	Q5JP53;P07437;Q5ST81	Q5JP53;P07437;Q5ST81	Tubulin beta chain	TUBB
24.6138	24.5849	24.3171	24.4271	24.6183	24.4736	14	20.6	28.3229	43			0.00315095	0.00106621	P05023;M0R116;A0A0A0MT26;P13637;B1AKY9;P50993;H0Y7C1;Q13733;M0QXF2;P20648;Q5TC01;E9PRA5;P54707	P05023;M0R116;A0A0A0MT26;P13637	Sodium/potassium-transporting ATPase subunit alpha-1;Sodium/potassium-transporting ATPase subunit alpha-3	ATP1A1;ATP1A3
22.734	23.1544	22.5711	22.9709	22.6094	22.8813	7	8.6	26.6725	24			0.00111386	0.000699997	O95163;F5H2T0;H0YDF3	O95163;F5H2T0	Elongator complex protein 1	IKBKAP
23.9916	24.5478	23.9508	24.2476	23.902	24.3365	12	17.2	28.0029	30			0.00190799	-0.0013663	P53618;E9PP73	P53618;E9PP73	Coatomer subunit beta	COPB1
24.9061	24.4232	24.3376	25.0186	24.3925	24.2468	13	19.3	28.3617	36			0.00331878	-0.00300026	Q13200;H7C1H2;F8WBS8;C9JPC0;H7C2Q3	Q13200	26S proteasome non-ATPase regulatory subunit 2	PSMD2
22.4942	22.1188	21.8005	22.4598	22.0237	21.9203	10	19.3	25.9144	17			0.00407139	-0.00323296	O95757;E9PDE8;D6RJ96	O95757;E9PDE8;D6RJ96	Heat shock 70 kDa protein 4L	HSPA4L
25.7469	25.694	25.7172	25.8162	25.6765	25.6489	15	30.6	29.4667	44			0.034435	-0.00550016	P38646;H0Y8S0;D6RA73;D6RJI2;H0YBG6	P38646	Stress-70 protein, mitochondrial	HSPA9
23.6319	22.1803	23.1571	21.9766	23.0586	23.9088	8	11.9	26.8974	25			0.00392117	-0.00843366	Q92922;F8VXC8;Q8TAQ2;F8WE13	Q92922	SWI/SNF complex subunit SMARCC1	SMARCC1
24.034	24.3951	23.7623	24.2601	24.0436	23.8554	7	21.1	27.8167	25			0.0164305	-0.010767	P26196;Q8IV96	P26196	Probable ATP-dependent RNA helicase DDX6	DDX6
21.4559	21.3977	21.9389	22.4148	21.0531	21.2879	6	10.1	25.2556	11			0.00886342	-0.0122286	H7C3P6;P52948;H0YDF4	H7C3P6;P52948	Nuclear pore complex protein Nup98-Nup96;Nuclear pore complex protein Nup98;Nuclear pore complex protein Nup96	NUP98
24.0375	24.378	24.1158	23.9614	24.3015	24.2198	14	17.1	27.9596	29			0.0378274	-0.0162004	Q9Y5B9	Q9Y5B9	FACT complex subunit SPT16	SUPT16H
24.1779	23.3846	23.5894	23.6838	23.2139	24.1865	9	30.5	27.5345	21			0.0204338	-0.0225665	Q01518;Q5T0R1;Q5T0R7;Q5T0R6;Q5T0R5;Q5T0R4;Q5T0R3;Q5T0R2;Q5T0R9;Q5T0S3	Q01518	Adenylyl cyclase-associated protein 1	CAP1
22.3952	22.0565	21.8858	21.5974	22.4389	22.2333	5	6.1	26.0057	9			0.0257762	-0.0226332	A0A087WUT6;O60841	A0A087WUT6;O60841	Eukaryotic translation initiation factor 5B	EIF5B
25.4251	25.7062	25.6693	25.251	25.9457	25.5256	10	26.1	29.5118	43			0.0402675	-0.0261002	E9PCY7;G8JLB6;P31943;D6RIU0;D6RBM0;D6RAM1;D6R9T0;D6RFM3;D6RIT2;D6RDU3;D6RJ04;D6RIH9;E7EQJ0;E5RGV0;E7EN40;D6RDL0;E5RGH4;H0YAQ2;H0YB39;E5RJ94;D6R9D3;D6RF17;H0YBG7;H0YBD7	E9PCY7;G8JLB6;P31943;D6RIU0;D6RBM0;D6RAM1;D6R9T0;D6RFM3;D6RIT2;D6RDU3;D6RJ04;D6RIH9;E7EQJ0;E5RGV0;E7EN40	Heterogeneous nuclear ribonucleoprotein H;Heterogeneous nuclear ribonucleoprotein H, N-terminally processed	HNRNPH1
27.8769	27.0964	26.9956	27.3227	27.5549	27.01	66	38.2	31.1105	225			0.0284436	-0.0270996	O75369;E7EN95;H7C5L4;A0A0A0MT44;A0A0C4DGA1	O75369;E7EN95	Filamin-B	FLNB
25.6935	25.7007	25.6142	25.1771	25.9057	25.8384	11	32.4	29.4231	45			0.042308	-0.0290674	Q9P258	Q9P258	Protein RCC2	RCC2
26.2971	26.4482	26.6629	26.2483	26.6141	26.4584	47	28.5	30.3026	130			0.0678033	-0.0291335	Q9Y490;Q9Y4G6;H0YMT1	Q9Y490	Talin-1	TLN1
24.0806	23.4024	23.52	23.8809	22.8878	24.1418	5	29.1	27.2706	15			0.023667	-0.0308336	D6RG13;P61247;H0Y8L7;D6RB09;E9PFI5;D6RAT0;D6RED7;D6RAS7;D6RI02;H0Y9Y4;D6RGE0;D6R9B6	D6RG13;P61247;H0Y8L7;D6RB09;E9PFI5;D6RAT0;D6RED7;D6RAS7	40S ribosomal protein S3a	RPS3A
23.0932	22.253	20.7099	21.5859	22.5383	21.8319	6	7.8	25.8551	13			0.0146425	-0.0333449	I3L2B0	I3L2B0		CLUH
23.6113	23.2653	23.0424	23.1455	23.498	23.1665	7	36.4	27.1228	15			0.0627934	-0.0363337	P21796;C9JI87	P21796;C9JI87	Voltage-dependent anion-selective channel protein 1	VDAC1
22.8751	23.18	23.3831	22.6998	23.1145	23.506	11	18.3	26.9929	24			0.0488985	-0.0392996	P42224;J3KPM9;H7BZ88;H7BZB5;E7EPD2;D2KFR9	P42224;J3KPM9	Signal transducer and activator of transcription 1-alpha/beta;Signal transducer and activator of transcription	STAT1
23.1644	23.0732	23.8087	23.1799	23.4609	23.2727	15	5.1	27.2569	38			0.0625697	-0.0442677	Q7Z6Z7;H0Y659;A0A087X1S3;A0A087X146	Q7Z6Z7	E3 ubiquitin-protein ligase HUWE1	HUWE1
24.3966	24.7272	24.8809	24.578	24.5968	24.6927	8	28.5	28.5446	24			0.112611	-0.0457338	B1AMS2;Q14141;D6RDU5;D6RGI3;D6RER5;Q9NVA2;H0Y961;D6RDP1;C9JV02;D6R9Y6;A0A087X142;A6NMH6;A6NFQ9;F8W8I8;Q92599	B1AMS2;Q14141;D6RDU5;D6RGI3;D6RER5;Q9NVA2	Septin-6;Septin-11	SEPT6;SEPT11
23.7261	23.846	23.4917	23.7596	23.4735	23.6906	5	9.5	27.5991	28			0.126666	-0.0467008	P27824;H0Y9Q7;D6RHJ3;D6RD16;D6RAQ8;D6RFL1;D6RAU8;D6RB85;D6RDP7;H0Y9H1;D6RGY2	P27824	Calnexin	CANX
25.2037	25.109	24.726	25.1939	24.9419	24.7589	19	34.6	28.8203	63			0.0884255	-0.0479997	Q92598;A0A0A0MSM0;R4GN69;Q5TBM3	Q92598;A0A0A0MSM0	Heat shock protein 105 kDa	HSPH1
25.0283	24.4776	24.7973	24.7736	24.6199	24.7602	25	25.1	28.5707	53			0.107726	-0.0498333	P35580;E7ERA5;A0A0C4DFM8;A1L2Z2	P35580	Myosin-10	MYH10
25.2146	25.1799	24.7939	25.0706	25.0411	24.9144	9	41.1	28.8194	22			0.139921	-0.0540994	P62701;C9JEH7;P22090;Q8TD47	P62701	40S ribosomal protein S4, X isoform	RPS4X
24.5631	24.2723	24.5527	25.0288	23.6952	24.5005	5	25.9	28.1914	31			0.0467451	-0.0545343	P06748;E5RGW4;E5RI98	P06748	Nucleophosmin	NPM1
22.5484	22.6712	22.4856	22.3897	22.288	22.8604	3	3.5	26.3244	11			0.109118	-0.0557003	P55160;F8W050	P55160;F8W050	Nck-associated protein 1-like	NCKAP1L
24.8469	24.4889	24.1549	24.298	24.5649	24.4524	13	17.8	28.3208	48			0.0977498	-0.0584666	P33176;A0A0G2JMZ6;J3KNA1;O60282;Q12840	P33176	Kinesin-1 heavy chain	KIF5B
21.871	22.0143	22.1106	21.8138	22.1004	21.9056	5	11	25.7914	7			0.207426	-0.0586993	O75439;G3V0E4;F8WAZ6	O75439;G3V0E4	Mitochondrial-processing peptidase subunit beta	PMPCB
25.3402	24.8685	24.2908	24.6155	25.0632	24.641	4	18.9	28.5341	15			0.0618553	-0.0599333	P62753;A2A3R7;A2A3R5	P62753;A2A3R7;A2A3R5	40S ribosomal protein S6	RPS6
27.1103	27.2418	26.7357	26.9068	27.139	26.8593	19	43.2	30.7208	58			0.128019	-0.0609004	P17987;E7EQR6;F5H282;E7ERF2;F5GZ03;F5H136;F5H726;F5H676;F5GZI8;F5H7Y1	P17987;E7EQR6;F5H282;E7ERF2	T-complex protein 1 subunit alpha	TCP1
30.4741	30.4462	30.1276	30.2693	30.5156	30.071	31	49.6	34.2026	172			0.13928	-0.0639998	P08238;Q58FF7	P08238	Heat shock protein HSP 90-beta	HSP90AB1
22.6555	23.7022	22.7171	22.3493	23.3964	23.1294	7	23.7	26.9188	17			0.0494118	-0.0665665	O00231;J3QRY4	O00231	26S proteasome non-ATPase regulatory subunit 11	PSMD11
22.4013	23.0494	23.8118	21.944	23.896	23.2159	11	8.3	27.2354	28			0.0331	-0.0688667	A6NEM2;P51610;H7C1C4	A6NEM2;P51610	Host cell factor 1;HCF N-terminal chain 1;HCF N-terminal chain 2;HCF N-terminal chain 3;HCF N-terminal chain 4;HCF N-terminal chain 5;HCF N-terminal chain 6;HCF C-terminal chain 1;HCF C-terminal chain 2;HCF C-terminal chain 3;HCF C-terminal chain 4;HCF C-terminal chain 5;HCF C-terminal chain 6	HCFC1
23.6908	24.0858	23.8729	23.7726	23.9473	23.7205	4	15.6	27.674	9			0.201803	-0.0696996	F8W6I7;Q32P51;P09651;F8VTQ5;F8VZ49;F8VYN5;H0YH80;F8W646	F8W6I7;Q32P51;P09651;F8VTQ5;F8VZ49;F8VYN5;H0YH80	Heterogeneous nuclear ribonucleoprotein A1-like 2;Heterogeneous nuclear ribonucleoprotein A1;Heterogeneous nuclear ribonucleoprotein A1, N-terminally processed	HNRNPA1;HNRNPA1L2
23.6823	23.7801	23.8396	23.5141	24.031	23.547	6	24.9	27.6335	24			0.150576	-0.0699666	P40925;C9JF79;C9JRL4;B9A041;C9JLV6;B8ZZ51	P40925;C9JF79;C9JRL4;B9A041	Malate dehydrogenase, cytoplasmic;Malate dehydrogenase	MDH1
21.6118	20.8425	21.1162	21.3599	21.5273	20.4682	3	10.7	24.1176	6			0.0625134	-0.0716947	Q9Y512	Q9Y512	Sorting and assembly machinery component 50 homolog	SAMM50
26.603	26.559	26.7542	26.48	26.5672	26.6378	15	28.1	30.4092	54			0.443215	-0.0770671	P26038;P35241;V9GZ54;E9PNP4;E9PQ82;E9PNV3	P26038	Moesin	MSN
22.6261	23.1211	24.1044	23.0133	23.1371	23.4604	9	14.4	27.2271	16			0.0612911	-0.080267	H9KV75;P12814;G3V2W4;G3V2N5;H0YJ11;H0YJW3;H7C5W8;P35609;G3V2E8;G3V5M4;G3V2X9;F6THM6;A0A087WSZ2;Q08043	H9KV75;P12814;G3V2W4	Alpha-actinin-1	ACTN1
29.0683	28.5519	28.9976	28.7947	28.7475	28.8336	64	41.2	32.6618	266			0.188625	-0.0806675	P35579;Q5BKV1;B1AH99	P35579	Myosin-9	MYH9
24.1663	24.815	24.2383	23.8013	24.7487	24.4265	3	19.7	28.1912	15			0.0829318	-0.0810337	Q15366;F8W0G4;F8VXH9;H3BRU6;F8VZX2;F8W1G6;J3QT27;E9PFP8;P57721;F8VTZ0;H3BND9;H3BSS4	Q15366;F8W0G4;F8VXH9;H3BRU6;F8VZX2;F8W1G6;J3QT27;E9PFP8;P57721	Poly(rC)-binding protein 2;Poly(rC)-binding protein 3	PCBP2;PCBP3
25.978	25.4264	26.664	25.9996	25.7745	26.0424	5	50	29.9635	15			0.0806759	-0.0839666	P07737;K7EJ44;I3L3D5;CON__P02584	P07737;K7EJ44;I3L3D5	Profilin-1	PFN1
23.612	24.0665	23.8952	24.1689	23.6771	23.4571	10	19.4	27.7081	30			0.13362	-0.0902004	Q09161;F2Z2T1;X6R941	Q09161	Nuclear cap-binding protein subunit 1	NCBP1
23.2094	24.0128	23.097	22.6279	23.8841	23.5326	9	13.9	27.3697	29			0.0676266	-0.0915337	C9J6P4;Q7Z2W4;H7C5K1	C9J6P4;Q7Z2W4	Zinc finger CCCH-type antiviral protein 1	ZC3HAV1
23.7919	24.0933	25.096	24.9228	24.1174	23.6652	16	14.6	28.1999	24			0.0590488	-0.0919342	P35573	P35573	Glycogen debranching enzyme;4-alpha-glucanotransferase;Amylo-alpha-1,6-glucosidase	AGL
21.1945	21.4638	21.4553	20.9591	21.5036	21.3652	4	6.4	24.9041	8			0.19705	-0.0952276	Q8TC07	Q8TC07	TBC1 domain family member 15	TBC1D15
26.108	25.735	25.5018	25.4497	25.9395	25.668	22	34.1	29.5188	73			0.158833	-0.0958672	P22102;F8WD69;C9JZG2;C9JKQ7;C9JBJ1;C9JTV6	P22102	Trifunctional purine biosynthetic protein adenosine-3;Phosphoribosylamine--glycine ligase;Phosphoribosylformylglycinamidine cyclo-ligase;Phosphoribosylglycinamide formyltransferase	GART
22.8482	22.6441	22.8575	22.1278	22.7702	23.1588	10	19	26.6175	18			0.11496	-0.0976753	P22059;H0YCV6;H7C1R2;H7C368;H7C428;A0A0A0MSB4;Q6ZN50;Q969R2	P22059	Oxysterol-binding protein 1	OSBP
21.691	21.8234	21.4168	21.0276	21.4995	22.1025	2	5.5	25.3158	8			0.109023	-0.10052	P20073	P20073	Annexin A7	ANXA7
25.2514	25.0732	25.9302	25.337	25.1401	25.4651	40	21.4	29.2674	100			0.138758	-0.1042	Q13813;A0A0D9SGF6;A0A0D9SF54;A0A0D9SFF6;A0A0D9SFH4	Q13813;A0A0D9SGF6;A0A0D9SF54	Spectrin alpha chain, non-erythrocytic 1	SPTAN1
23.5261	22.7451	22.6197	22.8068	22.8304	22.9388	9	12.8	26.871	19			0.135133	-0.104966	M0R2B7;P28340;M0QZR8;M0QXE6;M0QXQ2;M0R3H8;M0R2J2;M0QZB4;M0R2I8	M0R2B7;P28340;M0QZR8;M0QXE6	DNA polymerase;DNA polymerase delta catalytic subunit	POLD1
25.3288	25.7174	26.1069	25.51	25.892	25.4356	21	21.4	29.5843	48			0.147428	-0.105166	Q86VP6;A0A0C4DGH5;H0YH27;O75155	Q86VP6;A0A0C4DGH5	Cullin-associated NEDD8-dissociated protein 1	CAND1
23.2162	23.7315	24.0569	23.3174	23.6586	23.7093	12	17.3	27.5242	22			0.144228	-0.106434	A0A087X253;P63010;A0A087WYD1;A0A087WU93;A0A087WZQ6;K7EJ01	A0A087X253;P63010;A0A087WYD1;A0A087WU93;A0A087WZQ6	AP-2 complex subunit beta	AP2B1
23.1585	23.929	23.8291	23.4561	23.8014	23.3283	11	16	27.4092	21			0.146327	-0.110267	A0A087WVM4;B7ZM99;Q6UB35;H0Y327;Q4VXM0;Q5JYA8;Q5JYA3;Q4VXM1	A0A087WVM4;B7ZM99;Q6UB35	Monofunctional C1-tetrahydrofolate synthase, mitochondrial	MTHFD1L
21.875	23.0359	22.4455	20.8813	22.6003	23.5354	4	9.3	26.5739	14			0.0456929	-0.113121	H3BPE7;P35637;A0A075B7D9;Q92804	H3BPE7;P35637;A0A075B7D9;Q92804	RNA-binding protein FUS;TATA-binding protein-associated factor 2N	FUS;TAF15
24.9899	24.9564	25.408	24.7491	25.1782	25.0761	10	28.2	28.8796	35			0.236483	-0.116968	P05141;V9GYG0;P12235;Q9H0C2	P05141	ADP/ATP translocase 2;ADP/ATP translocase 2, N-terminally processed	SLC25A5
22.0527	20.4495	20.7038	21.1169	20.7973	20.9307	5	27.7	25.1563	10			0.0842313	-0.120347	H0YN42;P07355;H0YMD0;H0YMU9;H0YM50;H0YN28;H0YL33;H0YMM1;H0YNP5;H0YKS4;A6NMY6;H0YNA0;H0YKZ7;H0YLV6;H0YMT9;H0YKX9;H0YMW4;H0YLE2;H0YN52;H0YMD9;H0YKV8;H0YKL9	H0YN42;P07355;H0YMD0;H0YMU9;H0YM50;H0YN28;H0YL33;H0YMM1;H0YNP5;H0YKS4;A6NMY6	Annexin;Annexin A2;Putative annexin A2-like protein	ANXA2;ANXA2P2
21.0849	22.1388	22.7492	23.1495	19.6126	22.8476	2	20.7	26.0615	5			0.0331766	-0.121053	H3BTU6	H3BTU6	Coronin	CORO1A
24.804	25.4124	25.1924	24.3237	25.2229	25.4961	11	27.8	29.027	25			0.111535	-0.122033	P20700;E9PBF6;A0A0D9SFE5;A0A0D9SFY5	P20700;E9PBF6;A0A0D9SFE5	Lamin-B1	LMNB1
24.5231	24.6075	24.9769	24.4356	24.641	24.6531	10	26.3	28.4789	34			0.332264	-0.125933	P14868;H7BZ35;C9J7S3;H7C278;C9JLC1;C9JQM9	P14868	Aspartate--tRNA ligase, cytoplasmic	DARS
24.1029	24.3001	23.782	24.0981	23.9331	23.7677	13	24.5	27.8794	25			0.2916	-0.1287	P04843;B7Z4L4;F8WF32	P04843;B7Z4L4	Dolichyl-diphosphooligosaccharide--protein glycosyltransferase subunit 1	RPN1
21.799	22.5963	21.9339	21.8288	22.7335	21.3717	6	17.7	25.9905	11			0.100668	-0.131742	P61011;G3V4F7;G3V480	P61011;G3V4F7	Signal recognition particle 54 kDa protein	SRP54
22.0113	21.7917	22.0105	22.0426	22.2481	21.1204	2	6.7	25.6474	8			0.14009	-0.134134	Q01650	Q01650	Large neutral amino acids transporter small subunit 1	SLC7A5
24.3766	24.1076	23.2894	23.8743	23.2202	24.2696	3	18.4	27.5471	13			0.11031	-0.1365	H7BY10;K7EJV9;K7ERT8;A8MUS3;P62750;K7EMA7	H7BY10;K7EJV9;K7ERT8;A8MUS3;P62750;K7EMA7	60S ribosomal protein L23a	RPL23A
23.1658	23.0128	23.7279	22.5139	23.2891	23.6831	3	12.6	27.0923	13			0.126306	-0.140133	P11766;H0YAG8;D6RAY0;D6R9G2;D6RFE4	P11766;H0YAG8	Alcohol dehydrogenase class-3	ADH5
23.713	24.2748	24.4114	23.9812	24.1481	23.8417	6	18.2	27.8298	12			0.243657	-0.142733	F8VVM2;Q00325;F8VZL5;F8VWR4;F8VWQ0	F8VVM2;Q00325	Phosphate carrier protein, mitochondrial	SLC25A3
25.9893	26.0737	26.5068	25.7781	26.1952	26.1599	5	38	29.9931	28			0.280773	-0.145533	P63104;E7EX29;B0AZS6;E7ESK7;B7Z2E6;H0YB80;E5RGE1;E5RIR4;E9PD24;E7EVZ2	P63104;E7EX29;B0AZS6;E7ESK7	14-3-3 protein zeta/delta	YWHAZ
26.2666	26.2909	26.0003	26.0609	26.1975	25.8384	17	35.4	29.8586	54			0.476028	-0.153666	P31948;F5H783;F5GXD8;H0YGI8	P31948;F5H783	Stress-induced-phosphoprotein 1	STIP1
21.0723	22.0407	21.4006	21.5431	21.5593	20.935	2	15.3	24.6386	5			0.171115	-0.158747	E5RJR5;P63208;E5RGM3;E7ERH2;F8W8N3	E5RJR5;P63208;E5RGM3;E7ERH2;F8W8N3	S-phase kinase-associated protein 1	SKP1
23.5671	24.0125	23.0035	23.2291	23.422	23.4551	6	23.5	27.3253	25			0.2044	-0.158967	Q99733;E9PNW0;E9PJJ2;E9PS34;E9PNJ7;C9J6D1;C9JZI7;E9PKI2;E9PP22;A8MXH2;E9PKT8;C9J1B1;H0YCI4	Q99733;E9PNW0;E9PJJ2;E9PS34;E9PNJ7;C9J6D1;C9JZI7;E9PKI2;E9PP22;A8MXH2;E9PKT8	Nucleosome assembly protein 1-like 4	NAP1L4
22.8228	22.5802	21.9322	21.7514	22.8071	22.2995	3	10.8	26.1094	12			0.146202	-0.159071	Q13347;Q5TFK1	Q13347	Eukaryotic translation initiation factor 3 subunit I	EIF3I
23.7942	24.4782	24.066	23.9855	24.2345	23.6407	11	20.6	27.9429	22			0.2384	-0.159234	P49915	P49915	GMP synthase [glutamine-hydrolyzing]	GMPS
27.243	26.9085	27.3121	26.7604	27.3866	26.8387	45	27.8	30.9751	123			0.274185	-0.1593	O75643;B4E0P5	O75643	U5 small nuclear ribonucleoprotein 200 kDa helicase	SNRNP200
26.146	26.2709	26.1602	25.9079	26.2934	25.8832	23	39.4	29.9005	92			0.520613	-0.1642	P34932;A0A087WYC1;A0A087WTS8	P34932;A0A087WYC1;A0A087WTS8	Heat shock 70 kDa protein 4	HSPA4
21.7222	20.9915	22.19	21.3474	21.5298	21.5226	9	13.7	25.4692	19			0.180644	-0.167974	O60763	O60763	General vesicular transport factor p115	USO1
27.5622	27.4332	27.5014	27.3007	27.3671	27.3247	27	49.1	31.1529	124			1.79279	-0.168101	P55072;C9IZA5;C9JUP7	P55072	Transitional endoplasmic reticulum ATPase	VCP
20.9628	21.2595	20.9865	20.7723	20.6895	21.2408	4	2.2	24.5547	5			0.358025	-0.168708	Q8IWZ3;E9PDP5;H0YM23;O75179;D6RHC4;H7C2F5;H7C0V5;H3BLS9;H0YLQ3;H0Y785;H0Y472;H0Y4P6	Q8IWZ3;E9PDP5;H0YM23;O75179	Ankyrin repeat and KH domain-containing protein 1;Ankyrin repeat domain-containing protein 17	ANKHD1;ANKRD17
24.9154	25.0495	24.5716	24.5063	24.8041	24.6984	6	44.3	28.5131	17			0.454273	-0.1759	E9PPU1;P23396;E9PL09;F2Z2S8;H0YCJ7;H0YEU2;E9PQ96;E9PJH4;H0YF32;E9PK82;E9PQX2;E9PSF4;H0YES8	E9PPU1;P23396;E9PL09;F2Z2S8;H0YCJ7;H0YEU2;E9PQ96;E9PJH4;H0YF32;E9PK82	40S ribosomal protein S3	RPS3
23.4437	23.0931	22.9406	23.1816	23.1197	22.6398	10	17.6	26.8798	23			0.323399	-0.178767	P55884;C9JZG1;C9JQN7	P55884;C9JZG1	Eukaryotic translation initiation factor 3 subunit B	EIF3B
26.7966	26.6179	26.9445	26.3307	26.6913	26.7988	21	44.8	30.5938	68			0.454428	-0.179401	P13010;C9JZ81	P13010	X-ray repair cross-complementing protein 5	XRCC5
21.8722	21.9551	21.5552	21.9077	21.7804	21.1517	3	9.4	25.4364	9			0.275571	-0.180901	Q9Y3F4;H0YH33	Q9Y3F4;H0YH33	Serine-threonine kinase receptor-associated protein	STRAP
28.7522	28.7094	28.3273	28.4442	28.5094	28.2908	14	33.8	32.268	75			0.534097	-0.181499	Q5VTE0;P68104;A0A087WVQ9;A0A087WV01;Q05639;A6PW80;Q5JR01	Q5VTE0;P68104;A0A087WVQ9;A0A087WV01	Putative elongation factor 1-alpha-like 3;Elongation factor 1-alpha 1;Elongation factor 1-alpha	EEF1A1P5;EEF1A1
21.4713	22.1205	22.0128	22.4324	21.5983	21.0111	4	4.8	25.4726	7			0.152767	-0.187628	P49916;K7EQB6;K7ERZ5;K7ENR9	P49916;K7EQB6;K7ERZ5	DNA ligase 3	LIG3
21.2064	21.4231	21.5373	21.256	21.1614	21.1793	2	10.8	25.123	10			0.873353	-0.190033	F8WF02;C9J634;P11177	F8WF02;C9J634;P11177	Pyruvate dehydrogenase E1 component subunit beta, mitochondrial	PDHB
25.4613	25.703	25.9823	24.6161	25.833	26.1113	15	44.6	29.5794	59			0.150833	-0.1954	Q16555;E5RFU4;E9PD68;Q14195;Q14194;D6RF19;H0YBT4	Q16555	Dihydropyrimidinase-related protein 2	DPYSL2
24.0262	24.0127	23.5529	23.3795	23.9506	23.6722	11	16.3	27.572	35			0.361579	-0.1965	P35606;D6RBZ7;D6RCL6;D6RBG7;D6RBT6;D6R997;H0YAC7	P35606	Coatomer subunit beta	COPB2
23.2191	22.1867	22.5128	22.4144	22.3145	22.5995	4	8.3	26.2008	11			0.246253	-0.19673	E7ESY4;Q13330;H0Y4T7;F8W9Y9;E9PCS8;E7EQY4;D6W5A2;E7EV10;Q9BTC8	E7ESY4;Q13330;H0Y4T7	Metastasis-associated protein MTA1	MTA1
26.1282	25.8234	26.2197	25.7328	26.1832	25.6579	22	43.5	30.0018	58			0.417438	-0.199134	Q92499;F1T0B3;A0A087X2G1	Q92499;F1T0B3;A0A087X2G1	ATP-dependent RNA helicase DDX1	DDX1
23.2394	23.9771	22.7703	23.1733	23.1077	23.086	8	28.1	27.1205	23			0.229886	-0.2066	Q02790;F5H120;H0YFG2	Q02790	Peptidyl-prolyl cis-trans isomerase FKBP4;Peptidyl-prolyl cis-trans isomerase FKBP4, N-terminally processed	FKBP4
24.5648	24.8864	24.8916	24.3098	24.6835	24.7276	9	33.8	28.4954	38			0.534414	-0.2073	P04899;P63096;P08754;P09471;A0A087WTB6;A2A2R6;Q5JWD1;H0Y7E8;H3BTM2;A0A087WZE5;C9JPP4;Q5JWE9;H0Y7F4;P11488;P19087;A8MTJ3;P38405	P04899	Guanine nucleotide-binding protein G(i) subunit alpha-2	GNAI2
24.2179	24.0842	24.0869	23.5984	23.9831	24.1654	7	16.1	27.8338	23			0.54773	-0.214033	P17252;J3KRN5;H3BV73;M0R0I9;P05129	P17252;J3KRN5	Protein kinase C alpha type	PRKCA
24.0623	24.1	24.0076	23.5983	24.1748	23.7471	2	12.9	27.7446	9			0.54784	-0.216566	P62913;Q5VVC9;Q5VVC8	P62913;Q5VVC9;Q5VVC8	60S ribosomal protein L11	RPL11
24.1384	24.4161	23.6978	23.3964	24.3132	23.8647	12	15	27.855	20			0.267956	-0.225999	O75717;C9JYB3	O75717	WD repeat and HMG-box DNA-binding protein 1	WDHD1
23.7372	24.0371	24.1663	23.6099	23.6986	23.9523	9	20.5	27.8128	26			0.624081	-0.2266	P23368	P23368	NAD-dependent malic enzyme, mitochondrial	ME2
23.9977	24.2864	24.0798	23.9924	23.8042	23.8856	10	38.3	27.8261	26			1.04959	-0.227234	P61158;B4DXW1;F8WDR7;F8WEW2;F8WE84	P61158;B4DXW1	Actin-related protein 3	ACTR3
23.8622	24.059	24.2364	23.2738	24.1774	24.0228	12	15.3	27.8348	36			0.310898	-0.227866	Q9NSE4	Q9NSE4	Isoleucine--tRNA ligase, mitochondrial	IARS2
25.9277	26.3085	26.7733	25.7043	25.9803	26.6389	16	36.1	30.1427	52			0.244382	-0.228666	P48735;H0YL11	P48735;H0YL11	Isocitrate dehydrogenase [NADP], mitochondrial	IDH2
24.6046	24.042	24.353	24.3636	23.9472	24.0017	11	24.5	27.9431	29			0.476194	-0.229034	O14744;G3V580;G3V5L5;G3V2L6;G3V2X6;C9JSX3;H0YJX6;H0YJD3;G3V507;G3V2F5;G3V5T6;H0YJ77;H7BZ44	O14744;G3V580	Protein arginine N-methyltransferase 5;Protein arginine N-methyltransferase 5, N-terminally processed	PRMT5
23.016	23.1536	22.8755	23.1914	22.7327	22.4271	5	8	26.615	11			0.416978	-0.2313	Q9NR30	Q9NR30	Nucleolar RNA helicase 2	DDX21
24.5516	24.5984	24.3894	24.0826	24.5833	24.179	14	16.6	28.2595	35			0.628086	-0.2315	O95347;Q5T821;A0A0C4DGE5	O95347	Structural maintenance of chromosomes protein 2	SMC2
23.243	23.6691	23.3616	23.2516	23.1875	23.1398	4	12.8	27.119	11			0.818474	-0.2316	P00505	P00505	Aspartate aminotransferase, mitochondrial	GOT2
24.4374	25.1305	24.6844	24.4581	24.7347	24.3625	7	37.4	28.5944	26			0.429063	-0.232335	P60174;U3KQF3;U3KPZ0;U3KPS5	P60174	Triosephosphate isomerase	TPI1
23.7564	24.1304	24.1471	23.4511	24.4451	23.434	11	16	27.8348	20			0.26137	-0.234566	P54886	P54886	Delta-1-pyrroline-5-carboxylate synthase;Glutamate 5-kinase;Gamma-glutamyl phosphate reductase	ALDH18A1
24.6802	24.6723	24.4109	24.251	24.2789	24.517	3	20.5	28.2582	17			0.911829	-0.238834	H0YA96;D6RAF8;H0Y8G5;Q14103;D6RF44;D6RD83;D6RBQ9	H0YA96;D6RAF8;H0Y8G5;Q14103;D6RF44	Heterogeneous nuclear ribonucleoprotein D0	HNRNPD
26.3453	26.6744	26.468	25.9769	26.5355	26.2563	20	32.2	30.2468	71			0.56753	-0.239667	P56192;H0YHV5;F5H2V6;H0YIP0;H0YIC2;F8VS26;F8W0M7;F8W0S4;F8VZZ9;F8VPL7;H0YHL6;H0YI94;H0YI27	P56192	Methionine--tRNA ligase, cytoplasmic	MARS
20.4744	20.3721	21.3589	20.3183	20.5866	20.5772	2	5.7	24.4843	5			0.301158	-0.241095	Q7L576;A0A0G2JR96;A0A0G2JQT1;H0YL50;A0A0G2JRX2;A0A087WU52;A0A0G2JRV9;A0A087WWL1;A0A087WVE1;A0A087WTQ3;A0A087WWZ1	Q7L576;A0A0G2JR96;A0A0G2JQT1	Cytoplasmic FMR1-interacting protein 1	CYFIP1
22.8459	23.4108	23.6964	23.2512	23.5326	22.4446	7	21.7	27.0074	18			0.23055	-0.241567	Q96KP4;J3KRD5;J3QQN6;J3QR27;J3QLU1;A0A087WVS2;J3QKQ0;J3QRD0;J3QL02;J3KSV5;A0A087WYZ1;J3QKT2;J3QRA8	Q96KP4	Cytosolic non-specific dipeptidase	CNDP2
26.2642	26.1789	26.0886	25.7277	26.1243	25.9506	20	34.6	29.9586	76			0.903678	-0.243034	P33993;C9J8M6	P33993	DNA replication licensing factor MCM7	MCM7
24.5784	24.5442	24.8091	24.7718	24.2398	24.166	14	30.8	28.3067	21			0.53202	-0.251367	A0A087WTT1;E7ERJ7;P11940;E7EQV3;H0YAR2;Q9H361;H0YBN4;H0YB86;E5RGH3;E5RH24;E5RJB9;H0YAS6;H0YB75;H0YC10;E5RHG7;H0YAP2;H0YAS7;Q4VXU2;E5RGC4;E5RFD8;Q5JQF8	A0A087WTT1;E7ERJ7;P11940;E7EQV3;H0YAR2;Q9H361	Polyadenylate-binding protein;Polyadenylate-binding protein 1;Polyadenylate-binding protein 3	PABPC1;PABPC3
25.3783	25.4758	24.8781	25.0925	25.0142	24.8711	6	24.2	28.8293	30			0.570071	-0.251466	P15880;H0YEN5;E9PPT0;E9PMM9;E9PQD7;I3L404;E9PM36;H3BNG3;H0YE27	P15880;H0YEN5;E9PPT0;E9PMM9;E9PQD7	40S ribosomal protein S2	RPS2
26.5424	26.6564	26.9912	26.5301	26.5161	26.37	42	24.2	30.4816	140			0.829969	-0.257933	Q6P2Q9;I3L0J9;I3L3Z8	Q6P2Q9	Pre-mRNA-processing-splicing factor 8	PRPF8
26.0914	26.4956	26.2227	26.0985	25.94	25.9938	15	51.8	29.9399	52			0.948663	-0.259134	P00813;F5GWI4;F5GXW0;F5GYD4	P00813;F5GWI4;F5GXW0	Adenosine deaminase	ADA
23.3407	23.7519	23.4893	23.2266	23.2917	23.2821	2	19.3	27.2069	12			1.00239	-0.260499	P60866;E5RIP1;E5RJX2;G3XAN0	P60866;E5RIP1;E5RJX2;G3XAN0	40S ribosomal protein S20	RPS20
24.1339	24.5602	24.0511	24.722	23.5271	23.7009	4	30.5	27.7657	12			0.261012	-0.265067	M0R0F0;P46782;M0QZN2;M0R0R2	M0R0F0;P46782;M0QZN2;M0R0R2	40S ribosomal protein S5;40S ribosomal protein S5, N-terminally processed	RPS5
22.6097	22.4966	22.3758	22.236	22.0606	22.389	3	13.3	26.2117	10			1.07159	-0.265499	O95433;H0YJ63;G3V438;G3V3W9;H0YJG7	O95433;H0YJ63;G3V438	Activator of 90 kDa heat shock protein ATPase homolog 1	AHSA1
26.0206	26.123	26.5292	25.8449	26.0965	25.9327	19	23.7	30.0376	65			0.706866	-0.266233	P53396;K7ESG8	P53396	ATP-citrate synthase	ACLY
24.8146	25.3539	24.9277	24.505	24.9668	24.823	14	27	28.7781	51			0.554383	-0.267134	P54136;E5RJM9;E5RH09	P54136	Arginine--tRNA ligase, cytoplasmic	RARS
29.5526	30.5525	30.7457	29.962	29.8735	30.2041	18	58.3	34.2522	146			0.284974	-0.2704	P68363;P68366;F8VVB9;C9JDS9;F8VQQ4;F8VRZ4;F8VS66;F8VX09;F8VWV9;F8VRK0;F8VXZ7;C9K0S6;C9JDL2;C9JEV8;C9JQ00;C9JJQ8;F8W0F6;Q9H853	P68363;P68366	Tubulin alpha-1B chain;Tubulin alpha-4A chain	TUBA1B;TUBA4A
27.8025	28.5818	28.4021	27.6464	28.2028	28.1226	33	34.4	32.137	141			0.391419	-0.271533	Q08211	Q08211	ATP-dependent RNA helicase A	DHX9
25.9004	25.7758	25.8961	25.498	25.4258	25.829	9	24.1	29.6307	36			0.979733	-0.273167	P25705;K7ERX7;K7EK77;K7EQH4;K7EJP1;K7ESA0;K7ENJ4	P25705;K7ERX7;K7EK77	ATP synthase subunit alpha, mitochondrial	ATP5A1
27.3242	27.3614	27.6103	27.0182	27.2602	27.1971	37	34.3	31.09	119			1.11432	-0.273467	P07814;V9GYZ6;V9GZ76	P07814;V9GYZ6	Bifunctional glutamate/proline--tRNA ligase;Glutamate--tRNA ligase;Proline--tRNA ligase	EPRS
23.6032	21.6801	23.3431	23.2431	23.0101	21.5476	6	9.7	26.607	10			0.125521	-0.275195	Q96QK1;I3L4S0;I3L4P4	Q96QK1	Vacuolar protein sorting-associated protein 35	VPS35
24.9318	25.5293	25.5892	25.2674	25.1663	24.7824	21	24.5	29.0594	47			0.469106	-0.278067	P53621	P53621	Coatomer subunit alpha;Xenin;Proxenin	COPA
22.4072	22.8347	23.1212	22.5633	22.6081	22.3572	11	16.3	26.5422	23			0.557075	-0.278166	Q5JRX3;A0A0A0MRX9;B1APQ0;H0Y7L7	Q5JRX3;A0A0A0MRX9	Presequence protease, mitochondrial	PITRM1
22.6357	22.9566	22.8786	22.2702	22.7878	22.5585	8	8.1	26.8012	24			0.732212	-0.2848	Q9UIG0	Q9UIG0	Tyrosine-protein kinase BAZ1B	BAZ1B
22.6066	22.8933	22.8375	21.9759	22.7622	22.7324	9	14	26.4423	19			0.458813	-0.288964	O60341;R4GMQ1;R4GMP9	O60341	Lysine-specific histone demethylase 1A	KDM1A
25.9668	26.7135	26.4495	25.9554	26.2088	26.0772	9	23	30.2422	24			0.571391	-0.296133	P36578;H3BM89;H3BTP7;H3BU31	P36578;H3BM89	60S ribosomal protein L4	RPL4
22.82	23.1912	22.5677	21.164	23.2014	23.3151	5	20	26.6454	19			0.155177	-0.299475	Q52LJ0;H0YNA1	Q52LJ0	Protein FAM98B	FAM98B
27.5546	27.7376	27.7533	27.3798	27.5625	27.1952	77	23.1	31.3725	212			1.15032	-0.302666	P78527;F5GX40;H0YG84	P78527	DNA-dependent protein kinase catalytic subunit	PRKDC
25.1129	24.9861	24.8314	24.419	24.8597	24.7296	12	21.1	28.6056	33			0.93309	-0.307366	Q15046;H3BVA8;J3KRL2;H3BRC9;H3BPV7	Q15046	Lysine--tRNA ligase	KARS
27.7778	28.0581	27.7729	27.6145	27.6692	27.3899	16	42.3	31.6151	74			1.15221	-0.311733	P07900;Q14568;G3V2J8;Q58FG0;Q58FG1	P07900	Heat shock protein HSP 90-alpha	HSP90AA1
23.9882	24.1541	24.2731	23.4156	24.2901	23.7673	7	22.6	27.8899	21			0.515914	-0.314133	P00390;H0YC68;E5RI06	P00390	Glutathione reductase, mitochondrial	GSR
24.5551	24.6412	24.4133	24.4995	24.1961	23.9678	12	16.1	28.1333	33			0.875491	-0.315399	Q99613;B5ME19;H3BPE3;H3BPE4	Q99613;B5ME19	Eukaryotic translation initiation factor 3 subunit C;Eukaryotic translation initiation factor 3 subunit C-like protein	EIF3C;EIF3CL
24.158	24.8633	25.0062	24.1232	24.6513	24.2929	12	16.5	28.604	28			0.452067	-0.320034	Q13423;E9PCX7;D6RHU2;D6RAI5;H0Y8P5;D6RCR6	Q13423;E9PCX7	NAD(P) transhydrogenase, mitochondrial	NNT
25.2283	26.1158	26.102	25.391	25.8059	25.2797	15	34.5	29.5742	56			0.410559	-0.323167	O43776;K7EQ35;K7EIU7;K7EPK2;K7EMQ6;K7EJ19	O43776	Asparagine--tRNA ligase, cytoplasmic	NARS
22.4544	23.2504	22.775	22.0444	22.9471	22.5138	6	19.5	26.603	19			0.393643	-0.324835	P31350;C9JXC1	P31350;C9JXC1	Ribonucleoside-diphosphate reductase subunit M2	RRM2
23.377	22.688	22.9457	22.1911	22.882	22.9619	11	11.6	26.6748	20			0.440758	-0.325233	Q13045;J3QQQ2;J3QQU5;J3QLR6;K7EQZ7	Q13045	Protein flightless-1 homolog	FLII
25.2159	24.6073	24.938	24.547	24.6115	24.6162	8	31.8	28.552	22			0.862404	-0.328833	P47756;B1AK85;B1AK87;B1AK88	P47756;B1AK85;B1AK87;B1AK88	F-actin-capping protein subunit beta	CAPZB
23.4606	23.9948	24.4498	23.0826	24.2539	23.5796	15	24.7	27.8081	28			0.302107	-0.3297	A2A274;Q99798	A2A274;Q99798	Aconitate hydratase, mitochondrial	ACO2
22.9651	23.3669	23.666	23.3433	22.7191	22.9454	11	16.7	27.0459	18			0.532842	-0.330066	O43592;F8WDU6;F5GYW6;F5GZM3	O43592	Exportin-T	XPOT
23.4114	23.9528	23.5032	23.1155	23.4022	23.3546	10	16.7	27.4009	22			0.810559	-0.3317	E9PLK3;P55786;A6NEC2;H0YDG0;E9PJ74;E9PRQ5;H0YCQ5;E9PJY4;E9PPD4;E9PP11	E9PLK3;P55786;A6NEC2	Puromycin-sensitive aminopeptidase;Puromycin-sensitive aminopeptidase-like protein	NPEPPS;NPEPPSL1
23.4851	23.809	23.241	22.809	23.7624	22.9672	9	17.1	27.2449	23			0.418997	-0.332167	P48449;A0A0G2JQD0;C9J315;A0A0G2JS81	P48449;A0A0G2JQD0	Lanosterol synthase	LSS
20.9647	21.3725	21.6898	21.0895	21.0999	20.8399	2	20.8	24.794	9			0.665939	-0.332567	B3KYB6;A0A0A0MSW4;P48739;B3KYB7	B3KYB6;A0A0A0MSW4;P48739;B3KYB7	Phosphatidylinositol transfer protein beta isoform	PITPNB
24.2957	24.4928	24.3531	24.0449	23.9704	24.1249	4	24.5	28.0186	19			1.97758	-0.333799	A8MUD9;P18124	A8MUD9;P18124	60S ribosomal protein L7	RPL7
28.372	28.2553	28.3323	27.5795	28.333	28.0451	17	57.8	31.9702	79			0.683621	-0.334	P06733;K7EM90;P13929;E5RI09;E5RG95;K7EPM1;K7EKN2;E5RGZ4	P06733	Alpha-enolase	ENO1
22.9608	22.9599	22.4426	21.9151	22.8976	22.5477	6	14.2	26.5032	17			0.425712	-0.334308	A0A0G2JIW1;P0DMV9;P0DMV8;V9GZ37	A0A0G2JIW1;P0DMV9;P0DMV8;V9GZ37	Heat shock 70 kDa protein 1B;Heat shock 70 kDa protein 1A	HSPA1B;HSPA1A
26.8298	27.1721	27.2049	26.7477	26.7664	26.6879	20	32.8	30.8082	65			1.28462	-0.334934	Q14974;J3KTM9;J3QKQ5;J3QR48;J3QRG4	Q14974;J3KTM9	Importin subunit beta-1	KPNB1
26.0422	26.1554	25.4939	25.2732	25.6706	25.7399	9	33.7	29.6181	35			0.599715	-0.335933	Q02878;F8VZ45;U3KQR5;F8VR69;F8VZA3;F8VWR1;F8VU16	Q02878	60S ribosomal protein L6	RPL6
22.6388	22.4536	23.059	21.6435	22.7953	22.6941	7	21.9	26.4292	11			0.343281	-0.339501	Q15008;C9J0E9;H7C531;C9J7B7	Q15008	26S proteasome non-ATPase regulatory subunit 6	PSMD6
22.3061	22.0641	22.2218	21.9949	21.8672	21.7102	7	37	25.6715	17			1.45277	-0.3399	M0QZS6;Q9UBE0;B3KNJ4;M0QX65;M0R375;M0R286;M0QYM8;M0R054	M0QZS6;Q9UBE0;B3KNJ4	SUMO-activating enzyme subunit 1;SUMO-activating enzyme subunit 1, N-terminally processed	SAE1
24.3783	24.3836	24.0456	23.6606	23.7823	24.3327	3	28.3	27.8646	14			0.663154	-0.343966	P15531;E7ERL0;J3KPD9;Q32Q12;P22392;C9K028;F6XY72;E5RHP0	P15531;E7ERL0;J3KPD9;Q32Q12;P22392	Nucleoside diphosphate kinase A;Nucleoside diphosphate kinase;Nucleoside diphosphate kinase B	NME1;NME2;NME1-NME2
24.6288	24.5496	24.8043	23.4522	24.8087	24.6889	20	16.7	28.4452	47			0.320834	-0.3443	Q9NYU2;H7BZG0;Q9NYU1	Q9NYU2	UDP-glucose:glycoprotein glucosyltransferase 1	UGGT1
27.2954	27.3517	27.0602	26.8485	27.0231	26.8025	17	38.2	30.7875	59			1.43357	-0.3444	P49368;B4DUR8;E9PRC8;Q5SZX6;Q5SZX9;E9PQ35;E9PM09;Q5SZW8	P49368;B4DUR8	T-complex protein 1 subunit gamma	CCT3
26.6057	27.1724	27.0425	26.3268	26.8269	26.6317	24	38.9	30.6355	85			0.699732	-0.345066	H3BLZ8;Q92841;A0A0U1RQJ0	H3BLZ8;Q92841	Probable ATP-dependent RNA helicase DDX17	DDX17
25.8306	25.7644	25.3532	25.1126	25.7153	25.0846	15	23.8	29.334	45			0.609078	-0.345234	H0Y8E6;P49736	H0Y8E6;P49736	DNA replication licensing factor MCM2	MCM2
24.0494	24.2973	23.9131	23.7835	23.8115	23.628	11	15.4	27.7031	36			1.28497	-0.345599	A0A0B4J1W3;Q9BXJ9;Q6N069	A0A0B4J1W3;Q9BXJ9	N-alpha-acetyltransferase 15, NatA auxiliary subunit	NAA15
24.6065	24.4833	24.3452	24.2302	24.1986	23.9523	15	16.2	28.0038	39			1.41283	-0.3513	E9PD53;Q9NTJ3;C9JR83;C9J578;C9JVD8;C9J9E4	E9PD53;Q9NTJ3	Structural maintenance of chromosomes protein;Structural maintenance of chromosomes protein 4	SMC4
27.0439	27.2045	27.4242	26.579	26.7808	27.2547	25	37.5	30.9902	92			0.703958	-0.3527	P22314;Q5JRR6;Q5JRR9;Q5JRS0;Q5JRS1;Q5JRS3;Q5JRS2	P22314	Ubiquitin-like modifier-activating enzyme 1	UBA1
21.6526	22.2379	22.6522	21.2209	22.2784	21.977	10	11.4	25.9166	16			0.34415	-0.355469	E7ESC6;Q9UIA9;E5RIW1;H0YBE1;A0A087WTZ2;Q9H2T7	E7ESC6;Q9UIA9	Exportin-7	XPO7
23.2227	24.1283	23.8235	23.0984	23.4287	23.5772	11	7.1	27.442	25			0.519979	-0.356733	Q92621;U3KPX2	Q92621	Nuclear pore complex protein Nup205	NUP205
23.2559	23.4887	23.0635	22.1913	23.2818	23.2531	4	16.3	26.9217	19			0.402814	-0.360634	H0YL72;P50213;H0YMU3;H0YLI6;H0YKD0	H0YL72;P50213;H0YMU3;H0YLI6	Isocitrate dehydrogenase [NAD] subunit alpha, mitochondrial	IDH3A
25.4973	25.7508	25.2788	25.1717	25.5376	24.7355	13	31.6	29.0844	44			0.600312	-0.360699	P26641	P26641	Elongation factor 1-gamma	EEF1G
26.5414	26.9282	26.8993	26.2014	26.6081	26.471	29	33.7	30.4513	108			0.986158	-0.362799	P09874;Q5VX84;Q5VX85	P09874	Poly [ADP-ribose] polymerase 1	PARP1
22.1565	22.104	21.9666	21.1813	21.8716	22.0855	4	10.5	25.7428	9			0.58052	-0.362909	P63151;E5RFR9;Q66LE6;E5RIY1;Q00005	P63151;E5RFR9;Q66LE6	Serine/threonine-protein phosphatase 2A 55 kDa regulatory subunit B alpha isoform;Serine/threonine-protein phosphatase 2A 55 kDa regulatory subunit B delta isoform	PPP2R2A;PPP2R2D
22.134	22.988	23.1944	22.2349	22.5854	22.3933	4	13.4	26.5608	18			0.467898	-0.367601	P43034;I3L495;I3L3N5	P43034	Platelet-activating factor acetylhydrolase IB subunit alpha	PAFAH1B1
26.0956	25.8713	25.1092	25.4194	25.5015	25.0496	22	20.9	29.376	70			0.487138	-0.368533	P26358;K7ENW7;K7EJL0;K7EMU8;K7EIZ6;K7EP77;K7ENQ6	P26358	DNA (cytosine-5)-methyltransferase 1	DNMT1
24.213	23.6167	23.5888	20.9026	23.9103	25.4991	2	17.5	27.9683	7			0.0968578	-0.368837	P62805	P62805	Histone H4	HIST1H4A
23.9263	23.7004	23.853	23.5886	23.5258	23.2585	7	21.9	27.472	15			1.41822	-0.368933	B4DJV2;O75390;A0A0C4DGI3;H0YIC4;F8VTT8;F8W4S1;F8W642;F8VZK9;F8VX07;F8VRP1;F8VX68;F8VWQ5;F8VPF9;F8VPA1;F8W1S4;H0YH82;F8W0J2;F8VP03;F8VRI6;F8VU34;F8VR34;F8W031	B4DJV2;O75390;A0A0C4DGI3	Citrate synthase;Citrate synthase, mitochondrial	CS
26.0297	24.8134	25.4363	24.8237	25.0623	25.2775	8	42.9	29.114	32			0.423463	-0.371967	P27348;E9PG15	P27348;E9PG15	14-3-3 protein theta	YWHAQ
25.6538	25.564	25.3957	24.9782	25.474	25.0333	4	17.2	29.169	32			1.0131	-0.375999	P46777;Q5T7N0	P46777	60S ribosomal protein L5	RPL5
29.3853	29.908	29.7251	29.0971	29.6727	29.114	36	49.8	33.324	166			0.709724	-0.3782	P13639	P13639	Elongation factor 2	EEF2
28.8979	28.9189	29.1282	28.0813	28.9794	28.7388	25	56.9	32.7518	124			0.616246	-0.381833	P14618;B4DNK4;H3BTN5;H3BR70;H3BQ34;H3BUW1;H3BTJ2;H3BT25;H3BU13;H3BN34;H3BQZ3;P30613	P14618;B4DNK4;H3BTN5;H3BR70	Pyruvate kinase PKM;Pyruvate kinase	PKM
26.9061	26.9672	27.1837	26.4379	26.9768	26.4912	21	48.4	30.818	67			0.93946	-0.383699	P50990;H7C4C8;H7C2U0	P50990	T-complex protein 1 subunit theta	CCT8
27.0942	27.2769	27.2103	26.852	26.9508	26.6253	15	47.1	30.7007	54			1.59995	-0.384434	P61978;Q5T6W2;S4R457;S4R359	P61978;Q5T6W2	Heterogeneous nuclear ribonucleoprotein K	HNRNPK
24.8006	25.4456	25.6242	24.8715	25.0994	24.7315	14	26.8	29.2643	44			0.646316	-0.389334	P33992;B1AHB1;B1AHA9;B1AHB2;F8WFD7	P33992;B1AHB1	DNA replication licensing factor MCM5;DNA helicase	MCM5
24.5364	24.2407	24.753	23.7923	24.4967	24.0666	4	20.9	28.1638	15			0.7059	-0.3915	Q5T8U3;P62424;Q5T8U2	Q5T8U3;P62424	60S ribosomal protein L7a	RPL7A
23.3298	23.2925	23.718	22.9055	23.3479	22.9038	3	37.9	27.059	12			0.916995	-0.394367	Q5T4L4;P42677	Q5T4L4;P42677	40S ribosomal protein S27	RPS27
23.0289	23.7346	23.3206	22.4156	23.1187	23.3526	11	18.5	27.0977	29			0.500891	-0.399067	B4DKY1;P49589;C9JLN0;E9PRS8;E9PLP0	B4DKY1;P49589	Cysteine--tRNA ligase, cytoplasmic	CARS
26.5639	26.9909	26.4439	26.1957	26.4239	26.1816	19	43.3	30.2738	61			1.02044	-0.399166	Q99832;F8WAM2;F8WBP8	Q99832	T-complex protein 1 subunit eta	CCT7
27.0715	27.0615	26.9759	26.3646	26.9235	26.6126	21	32.8	30.7017	77			1.1513	-0.402734	O43143	O43143	Pre-mRNA-splicing factor ATP-dependent RNA helicase DHX15	DHX15
25.3569	25.3162	24.1519	24.5746	24.6816	24.3435	8	31.4	28.5848	23			0.428432	-0.408433	E9PKG1;H7C2I1;Q99873;E9PQ98;E9PIX6;A0A087X1W2;E9PNR9;H0YDE4;Q9NR22;E9PMW9	E9PKG1;H7C2I1;Q99873;E9PQ98;E9PIX6;A0A087X1W2;E9PNR9;H0YDE4	Protein arginine N-methyltransferase 1	PRMT1
21.618	21.7304	22.7232	21.4566	21.3992	21.9854	5	23.9	25.7519	13			0.442929	-0.410133	P40121;E7ENU9;B8ZZL6	P40121;E7ENU9	Macrophage-capping protein	CAPG
27.0684	26.6087	27.3338	26.3139	26.9395	26.5149	9	21.3	30.7949	28			0.669056	-0.414199	P31146;H3BRY3;H3BNA2;H3BU76;H3BSL1;H3BRJ0	P31146;H3BRY3	Coronin-1A;Coronin	CORO1A
21.2818	21.4764	22.0934	20.9013	21.5191	21.1852	3	5.7	25.2191	6			0.61591	-0.415345	P46063;F5H2L2;F8WA66;F8WD97	P46063	ATP-dependent DNA helicase Q1	RECQL
23.611	23.7197	23.9154	23.4425	23.5078	23.0444	11	14.1	27.4351	28			1.15383	-0.417134	Q9NZB2;A0A0C4DG79;A0A0C4DH52;Q5T035	Q9NZB2	Constitutive coactivator of PPAR-gamma-like protein 1	FAM120A
24.5776	25.2518	25.1281	24.6523	24.7961	24.2559	11	25	28.6586	46			0.728039	-0.417734	P61221;D6R9I9;D6RGF4;H0Y990	P61221;D6R9I9	ATP-binding cassette sub-family E member 1	ABCE1
22.7095	23.0778	22.2811	21.2457	22.752	22.8155	5	24.3	26.272	8			0.302638	-0.418409	Q00535	Q00535	Cyclin-dependent-like kinase 5	CDK5
25.0942	25.309	25.3141	24.5787	24.8404	25.0422	20	29.3	28.9031	51			1.28725	-0.418667	P33991;E5RG31;E5RFJ8	P33991	DNA replication licensing factor MCM4	MCM4
23.2798	23.5264	23.4338	22.7725	23.1214	23.0816	5	27.2	27.0397	17			1.4835	-0.4215	P12004	P12004	Proliferating cell nuclear antigen	PCNA
27.9745	28.0833	28.474	27.5694	27.7279	27.9639	17	57.3	31.8782	88			1.04669	-0.423534	P00558;P07205	P00558	Phosphoglycerate kinase 1	PGK1
24.8039	24.7312	24.3533	24.3138	24.5286	23.775	12	22.3	28.2115	28			0.73532	-0.423666	P23921;E9PL69;E9PP77;H0YCY7	P23921;E9PL69	Ribonucleoside-diphosphate reductase large subunit	RRM1
24.3848	25.2077	26.2645	24.267	24.8583	25.4584	20	29.2	29.1621	46			0.263092	-0.424433	B0I1T2;F8WEW9;J3KRL0;K7EIG7;J3QRN6;O94832	B0I1T2	Unconventional myosin-Ig;Minor histocompatibility antigen HA-2	MYO1G
27.1378	27.2643	26.9276	26.5746	26.8666	26.6147	11	37.7	30.711	42			1.46842	-0.4246	P00338;F5GXY2;F5GXH2;F5GYU2;F5H5J4;F5H6W8;F5GZQ4;F5H8H6;F5GXC7;F5GWW2;F5GXU1	P00338;F5GXY2	L-lactate dehydrogenase A chain	LDHA
24.4449	24.2716	24.9431	24.6385	24.1137	23.6302	4	40	28.1478	12			0.52963	-0.425734	I3L3P7;P62244;I3L246;H3BN98;H3BV27;H3BT37;I3L303;H3BVC7	I3L3P7;P62244;I3L246;H3BN98	40S ribosomal protein S15a	RPS15A
26.7064	26.4187	26.558	25.9703	26.3076	26.1276	14	31	30.1994	41			1.53438	-0.425866	P50991	P50991	T-complex protein 1 subunit delta	CCT4
28.7447	28.8699	29.0136	28.2479	28.5698	28.5328	14	42.5	32.5714	51			1.53523	-0.4259	P07195;A8MW50;C9J7H8;F5H793;F5H5G7;F5H155;A0A087WUM2;G3XAP5;F5H245;Q6ZMR3;P07864	P07195;A8MW50;C9J7H8;F5H793	L-lactate dehydrogenase B chain;L-lactate dehydrogenase	LDHB
22.2641	22.775	23.1254	22.1817	22.2988	22.3859	6	24.9	26.3938	16			0.77597	-0.432689	J3KNQ3;A0A087WUL9;Q9UNM6;E9PL38;H0YD73;E9PQG3;E9PPD2	J3KNQ3;A0A087WUL9;Q9UNM6;E9PL38;H0YD73	26S proteasome non-ATPase regulatory subunit 13	PSMD13
24.3022	24.4711	24.2473	23.7497	24.1555	23.7995	10	31.4	27.9313	28			1.4143	-0.438633	P41091;Q2VIR3;F8W810;H7BZU1	P41091;Q2VIR3;F8W810	Eukaryotic translation initiation factor 2 subunit 3;Putative eukaryotic translation initiation factor 2 subunit 3-like protein	EIF2S3;EIF2S3L
23.8145	23.7061	23.3281	23.1295	23.3389	23.0478	8	15.9	27.2004	21			1.22018	-0.444167	P54577;A0A0C4DGZ5	P54577;A0A0C4DGZ5	Tyrosine--tRNA ligase, cytoplasmic;Tyrosine--tRNA ligase, cytoplasmic, N-terminally processed;Tyrosine--tRNA ligase	YARS
24.6178	25.0083	24.4751	24.1863	24.4043	24.1709	9	17.6	28.2886	29			1.19079	-0.446566	P17812	P17812	CTP synthase 1	CTPS1
23.7386	24.6444	24.6299	23.5767	23.9886	24.1073	9	24.3	28.0497	33			0.58655	-0.446767	P14866;M0QXS5;M0QYT0;M0R076;M0QYL7;M0R1W6	P14866;M0QXS5	Heterogeneous nuclear ribonucleoprotein L	HNRNPL
21.3805	22.0798	21.5146	21.0116	21.587	20.996	4	8.4	25.0904	12			0.728113	-0.460097	H0YGW7;Q8NE71;A0A0G2JIC2	H0YGW7;Q8NE71	ATP-binding cassette sub-family F member 1	ABCF1
22.7055	23.3794	22.8486	21.0771	23.1118	23.3484	7	16	26.8416	20			0.245452	-0.465399	P42166	P42166	Lamina-associated polypeptide 2, isoform alpha;Thymopoietin;Thymopentin	TMPO
25.0705	25.2418	24.8889	24.4143	25.0591	24.3285	14	32.9	28.7152	40			0.860339	-0.466433	P11021	P11021	78 kDa glucose-regulated protein	HSPA5
26.3961	26.6581	26.4637	25.8333	26.3244	25.9412	15	40.9	30.1808	44			1.3151	-0.473	P22234;E9PBS1;D6RF62	P22234;E9PBS1;D6RF62	Multifunctional protein ADE2;Phosphoribosylaminoimidazole-succinocarboxamide synthase;Phosphoribosylaminoimidazole carboxylase	PAICS
24.3285	24.4924	24.4007	23.2687	24.2755	24.2521	9	22.3	28.096	25			0.63964	-0.4751	P09960	P09960	Leukotriene A-4 hydrolase	LTA4H
22.2593	22.3518	22.443	21.3424	22.0138	22.2677	4	9.6	25.8248	7			0.782258	-0.476719	P41240;H3BUM9;H3BU69;K7ENL8;K7ES68;K7EQY5;A0A087WUR1;P42679	P41240;H3BUM9	Tyrosine-protein kinase CSK	CSK
25.5841	25.9551	26.0158	25.3024	25.603	25.2186	8	23.6	29.5255	35			1.25507	-0.477	P23526	P23526	Adenosylhomocysteinase	AHCY
26.6164	26.7046	26.2995	26.0105	26.0396	26.139	17	33.5	30.1055	68			1.68068	-0.477133	E7ENZ3;P48643;B7ZAR1;E9PCA1;D6RIZ7;H0Y914	E7ENZ3;P48643;B7ZAR1;E9PCA1	T-complex protein 1 subunit epsilon	CCT5
25.2143	24.9942	24.8478	24.0115	24.948	24.6653	9	18	28.6583	23			0.736351	-0.477166	Q9NSD9	Q9NSD9	Phenylalanine--tRNA ligase beta subunit	FARSB
25.5364	25.4683	25.6671	24.8847	25.1653	25.1828	12	27.8	29.181	34			1.88124	-0.479666	O60506;B7Z645;F6UXX1	O60506;B7Z645	Heterogeneous nuclear ribonucleoprotein Q	SYNCRIP
22.2414	21.6649	21.4779	20.2453	21.615	22.0681	4	17.7	25.3304	13			0.337315	-0.48528	P20042	P20042	Eukaryotic translation initiation factor 2 subunit 2	EIF2S2
25.5322	25.791	25.3271	24.8064	25.2493	25.1328	11	39.5	29.1829	46			1.21376	-0.487267	F8VYE8;P36873;F8VR82;F8W0W8;A0A087WYY5	F8VYE8;P36873;F8VR82;F8W0W8;A0A087WYY5	Serine/threonine-protein phosphatase;Serine/threonine-protein phosphatase PP1-gamma catalytic subunit	PPP1CC
23.025	23.6009	23.9194	22.7913	23.3066	22.9825	7	40.7	27.1923	13			0.742192	-0.4883	P25786;F5GX11;B4DEV8	P25786;F5GX11;B4DEV8	Proteasome subunit alpha type-1;Proteasome subunit alpha type	PSMA1
23.7622	24.3531	24.2269	23.6349	23.6663	23.5685	12	22.2	27.7716	26			1.26569	-0.490833	P23743;G3V4E1;G3V327;C9JM35;F8W1M3;F8W1H7;H0YJH4;F8VNZ9;G3V4I3;F8VWX8;G3V312	P23743;G3V4E1	Diacylglycerol kinase alpha;Diacylglycerol kinase	DGKA
25.5361	25.8449	25.9425	24.831	25.4761	25.528	21	24.5	29.4599	77			0.906304	-0.496133	P26640;A2ABF4;A0A0G2JJT9;H0Y426	P26640	Valine--tRNA ligase	VARS
21.5358	21.8065	21.6829	20.5609	22.3649	20.5993	3	4.5	25.6391	9			0.345217	-0.500011	Q9P253	Q9P253	Vacuolar protein sorting-associated protein 18 homolog	VPS18
23.0597	22.889	23.3181	21.286	23.3351	23.1353	3	36.9	26.9206	7			0.309273	-0.503452	E9PMW7;E9PIZ1;E9PPR1;E9PL12;E9PQ49;E9PI39;H0YCK7;E9PK01;A0A087X1X7;E9PRY8;P29692;E9PN91;E9PL71	E9PMW7;E9PIZ1;E9PPR1;E9PL12;E9PQ49;E9PI39;H0YCK7;E9PK01;A0A087X1X7;E9PRY8;P29692;E9PN91;E9PL71	Elongation factor 1-delta	EEF1D
23.4891	23.5981	23.1835	22.5577	23.5537	22.6312	4	16.9	27.0109	16			0.672838	-0.509367	J3QT28;O43684;J3QSX4	J3QT28;O43684;J3QSX4	Mitotic checkpoint protein BUB3	BUB3
23.8871	24.4464	24.624	23.3076	24.2931	23.827	24	6.3	27.955	43			0.63707	-0.509933	Q5T4S7;A0A0A0MSW0;X6R960;Q5TBN9;X6RE05	Q5T4S7	E3 ubiquitin-protein ligase UBR4	UBR4
22.347	22.2866	22.2412	21.3523	22.0202	21.961	4	9	25.7823	9			1.12041	-0.513775	H0YLH3;Q92696;H0YKZ8;H0YMG5	H0YLH3;Q92696	Geranylgeranyl transferase type-2 subunit alpha	RABGGTA
21.4721	21.9471	22.0394	20.9832	21.6873	21.2447	4	15.7	25.0632	9			0.886558	-0.514471	P40938;A0A087X270	P40938;A0A087X270	Replication factor C subunit 3	RFC3
25.8622	25.5743	25.5628	24.8767	25.55	25.0285	19	22.2	29.3073	61			1.06948	-0.514701	Q15393;J3QRB2;J3QL37;I3L4G7;J3QKV4	Q15393	Splicing factor 3B subunit 3	SF3B3
27.1961	27.6494	27.814	26.9244	27.1618	27.0139	35	36.8	31.2107	129			1.23732	-0.5198	P41252;A0A0A0MSX9;J3KR24;Q5TCD1;Q5TCC6;Q5TCC9	P41252;A0A0A0MSX9;J3KR24	Isoleucine--tRNA ligase, cytoplasmic	IARS
24.688	24.521	24.5965	24.1507	24.1955	23.8828	11	31.2	28.1449	33			2.07096	-0.525501	P49411;H3BNU3	P49411	Elongation factor Tu, mitochondrial	TUFM
22.645	22.1822	22.3442	20.6857	22.5906	22.2878	9	6.4	26.0452	13			0.36975	-0.535783	Q92538	Q92538	Golgi-specific brefeldin A-resistance guanine nucleotide exchange factor 1	GBF1
26.1403	26.1169	26.5904	25.5203	26.0302	25.6797	20	45.8	29.9573	58			1.1765	-0.539134	P31939;H7C1S2;C9JLK0;F8WEF0	P31939	Bifunctional purine biosynthesis protein PURH;Phosphoribosylaminoimidazolecarboxamide formyltransferase;IMP cyclohydrolase	ATIC
23.6636	25.1109	25.1034	24.0988	24.3239	23.8267	10	20	28.2791	19			0.467816	-0.542833	P41250;H7C443	P41250	Glycine--tRNA ligase	GARS
22.7503	22.3374	22.119	21.6142	22.1132	21.842	4	28.1	25.926	14			1.09354	-0.545767	Q5SRQ3;Q5SRQ6;P67870;N0E472;A0A0G2JM12;N0E644;A0A0G2JM58	Q5SRQ3;Q5SRQ6;P67870;N0E472;A0A0G2JM12;N0E644;A0A0G2JM58	Casein kinase II subunit beta	CSNK2B-LY6G5B-1181;CSNK2B;CSNK2B-LY6G5B--991;CSNK2B-LY6G5B-562
23.9857	24.1941	24.6379	23.5243	24.2557	23.3972	5	18.4	28.006	15			0.763709	-0.546834	Q09028;H0YF10;H0YEU5;H0YCT5;H0YDK2;E9PNS2;E9PIC4;E9PNS6;Q5JP02;Q5JP01	Q09028;H0YF10	Histone-binding protein RBBP4	RBBP4
21.1527	21.5896	23.52	21.3621	22.0146	21.2446	2	3.1	25.711	3			0.288618	-0.546973	A0A0A6YYL4;P57737	A0A0A6YYL4;P57737	Coronin;Coronin-7	CORO7-PAM16;CORO7
26.2206	25.7607	25.4834	24.8094	25.6466	25.3674	20	19.6	29.3909	51			0.771095	-0.5471	Q16531;F5GY55;F5GWI0;F5GZY8;F5H2L3;F5GYG8;F5H198	Q16531;F5GY55	DNA damage-binding protein 1	DDB1
23.3246	23.0038	22.6259	21.478	22.9123	22.9215	6	35.6	26.6302	11			0.453297	-0.547509	C9J9K3;A0A0C4DG17;P08865;F8WD59	C9J9K3;A0A0C4DG17;P08865	40S ribosomal protein SA	RPSA
26.1078	26.1833	26.342	25.4868	25.8153	25.6304	18	31	29.7759	60			2.07097	-0.566867	P26639;D6R9F8;D6RCA5;D6RDJ6;B7ZLP8;A2RTX5	P26639	Threonine--tRNA ligase, cytoplasmic	TARS
22.3839	22.1922	22.2803	21.2561	22.0244	21.8682	4	9.4	25.8481	12			1.11116	-0.569241	Q99567;J3KMX1;I3L2W3	Q99567;J3KMX1	Nuclear pore complex protein Nup88	NUP88
23.5736	23.2925	22.5297	20.9936	23.7762	22.917	9	30.8	26.9071	17			0.25761	-0.56967	P31930	P31930	Cytochrome b-c1 complex subunit 1, mitochondrial	UQCRC1
25.9728	26.495	26.4062	25.4275	26.1092	25.6226	24	38.6	29.9586	85			1.03622	-0.571567	Q7KZF4;H7C597	Q7KZF4	Staphylococcal nuclease domain-containing protein 1	SND1
24.2918	24.5215	24.5714	23.6528	24.3578	23.6559	20	11.5	28.044	39			1.07782	-0.572734	A5YKK6;H3BMZ2;B5MDN3;H3BNB1;H3BR89;H3BMH0;H3BVC9	A5YKK6	CCR4-NOT transcription complex subunit 1	CNOT1
23.6626	24.1598	24.0656	23.1871	23.7192	23.2555	4	9.5	27.5399	15			1.19548	-0.575399	O15371;B0QYA5;B0QYA4;B0QYA8;B0QYA6	O15371;B0QYA5	Eukaryotic translation initiation factor 3 subunit D	EIF3D
21.1898	22.1331	22.2313	21.2313	21.4005	21.1761	8	4.4	25.4863	15			0.793419	-0.582099	H0Y7L2;Q96N67;A0A0C4DGY6;A0A0U1RR97;A0A0U1RQT6;A0A0U1RRC1;A0A0U1RQJ5	H0Y7L2;Q96N67;A0A0C4DGY6	Dedicator of cytokinesis protein 7	DOCK7
27.9868	28.5833	28.5531	27.4285	28.0909	27.8492	49	39.5	32.0046	164			1.00123	-0.584867	A0A087WVQ6;Q00610;J3KS13;A0A087WX41;P53675;J3KSQ2;K7EJJ5;J3QL20;J3KRF5;F5H5N6	A0A087WVQ6;Q00610	Clathrin heavy chain;Clathrin heavy chain 1	CLTC
22.6167	22.7578	22.7767	22.266	22.4157	21.7123	5	12.9	26.3144	17			1.25097	-0.585732	E7ES33;E7EPK1;Q16181;G3V1Q4;A0A0U1RRM2;A0A0U1RQK0;A0A0U1RRD1	E7ES33;E7EPK1;Q16181;G3V1Q4	Septin-7	39326
23.8886	24.1802	23.9808	23.4605	23.5701	23.2562	8	18.1	27.7048	19			2.01984	-0.587599	Q96G03;E9PD70;E7ENQ8;H0Y921	Q96G03	Phosphoglucomutase-2	PGM2
25.8767	26.6776	26.4946	25.4505	25.7674	26.0413	12	30.2	29.8978	30			0.941444	-0.596567	P52209;K7EM49;K7EMN2;K7EPF6	P52209;K7EM49;K7EMN2;K7EPF6	6-phosphogluconate dehydrogenase, decarboxylating	PGD
21.4569	21.2178	21.8924	20.1599	21.3379	21.2659	3	5	24.378	4			0.630649	-0.601118	P23786	P23786	Carnitine O-palmitoyltransferase 2, mitochondrial	CPT2
24.6207	24.2597	24.8851	23.1703	24.1279	24.6456	14	31.2	28.1455	36			0.577145	-0.607234	Q86UX7;F5H1C6;H0YFT5	Q86UX7;F5H1C6	Fermitin family homolog 3	FERMT3
26.9634	27.3067	27.3646	26.3057	27.0166	26.4902	30	43.9	30.8039	83			1.15613	-0.6074	P11586;F5H2F4;V9GYY3	P11586;F5H2F4	C-1-tetrahydrofolate synthase, cytoplasmic;Methylenetetrahydrofolate dehydrogenase;Methenyltetrahydrofolate cyclohydrolase;Formyltetrahydrofolate synthetase;C-1-tetrahydrofolate synthase, cytoplasmic, N-terminally processed	MTHFD1
22.894	22.8737	22.9361	20.66	22.9284	23.2809	14	9.6	26.6398	21			0.302801	-0.611496	A6NHR9;J3KTL8;J3KRK8	A6NHR9;J3KTL8	Structural maintenance of chromosomes flexible hinge domain-containing protein 1	SMCHD1
26.246	26.3854	26.5925	26.0759	25.4342	25.8595	12	60	29.8566	36			1.35217	-0.6181	P62258;K7EM20;B4DJF2;I3L3T1;K7EIT4;P31947;I3L0W5;Q4VY20;A0A0J9YWZ2;Q4VY19;A0A0J9YWE8	P62258	14-3-3 protein epsilon	YWHAE
25.0226	25.2347	25.6665	24.231	24.738	25.0859	19	29.7	28.9705	55			0.932676	-0.622966	Q15029;K7EP67;K7EJ74;K7EIV5;K7EIT3	Q15029	116 kDa U5 small nuclear ribonucleoprotein component	EFTUD2
24.643	25.6913	25.0498	24.641	24.3726	24.4853	9	15.1	28.8097	23			0.932898	-0.6284	Q92973;S4R398;E7EW37	Q92973	Transportin-1	TNPO1
26.5818	27.1067	27.3298	26.0612	26.7004	26.3697	13	34.7	30.6787	59			1.02366	-0.629001	P40227;Q92526;J3KRI6	P40227	T-complex protein 1 subunit zeta	CCT6A
25.8497	26.6068	26.3663	25.6547	25.6024	25.663	10	25.6	29.9214	29			1.3245	-0.634234	P30153;C9J9C1;B3KQV6;H0YDG7;M0QXG4;M0R0K6;E9PH38	P30153;C9J9C1;B3KQV6	Serine/threonine-protein phosphatase 2A 65 kDa regulatory subunit A alpha isoform	PPP2R1A
22.4278	22.5849	23.2587	20.9117	22.831	22.6233	4	16.8	26.4903	10			0.408975	-0.635136	B4DY09;Q12905;X6R6Z1;A0A0A0MRL0	B4DY09;Q12905;X6R6Z1;A0A0A0MRL0	Interleukin enhancer-binding factor 2	ILF2
30.5524	30.8215	31.3869	30.0405	30.4494	30.3635	15	61.9	34.5525	157			1.08449	-0.6358	P60709;P63261;I3L4N8;I3L3I0;I3L1U9;G5E9R0;E7EVS6;Q6S8J3;C9JZR7;I3L3R2;J3KT65;A5A3E0;C9JUM1;Q9BYX7;P0CG38;C9JTX5;P0CG39;F8WCH0	P60709;P63261;I3L4N8	Actin, cytoplasmic 1;Actin, cytoplasmic 1, N-terminally processed;Actin, cytoplasmic 2;Actin, cytoplasmic 2, N-terminally processed	ACTB;ACTG1
21.8431	21.3255	22.7718	21.5766	21.2255	21.2245	4	4.9	25.6355	6			0.657834	-0.637929	P23634;P20020;E7ERY9;Q16720	P23634;P20020	Plasma membrane calcium-transporting ATPase 4;Plasma membrane calcium-transporting ATPase 1	ATP2B4;ATP2B1
23.3723	23.8043	23.3516	22.9513	23.0836	22.5781	7	23.7	27.0958	19			1.40716	-0.6384	J3KNL2;Q8WYJ6	J3KNL2;Q8WYJ6	Septin-1	37135
27.7567	27.655	27.8894	26.733	27.4203	27.2305	15	38	31.4213	76			1.38163	-0.639101	P29401;A0A0B4J1R6;E9PFF2;F8W888	P29401;A0A0B4J1R6;E9PFF2	Transketolase	TKT
26.3273	26.3459	26.8751	25.7314	26.0863	25.8053	17	39.3	30.1188	63			1.42486	-0.641766	P78371;F5GWF6;F8VQ14	P78371;F5GWF6;F8VQ14	T-complex protein 1 subunit beta	CCT2
24.6331	24.5215	24.8041	23.9724	24.2602	23.7886	8	23.6	28.1891	21			1.80584	-0.645833	P13489;E9PMJ3;E9PLZ3;E9PIM9;E9PMA9;E9PMN0;E9PIK5;H0YCR7;E9PR82;E9PMI1	P13489;E9PMJ3;E9PLZ3;E9PIM9	Ribonuclease inhibitor	RNH1
26.2747	26.8945	26.3608	25.56	26.5376	25.4855	6	37.8	30.0698	25			0.764838	-0.648967	Q5JR95;P62241	Q5JR95;P62241	40S ribosomal protein S8	RPS8
26.1351	26.771	26.9875	25.7477	25.978	26.2152	14	33	30.2078	49			1.05752	-0.650899	O43175;Q5SZU1	O43175;Q5SZU1	D-3-phosphoglycerate dehydrogenase	PHGDH
21.3686	21.5813	23.0894	21.6097	21.6393	20.8337	3	17.4	25.5624	6			0.468659	-0.652195	P09488;H3BRM6;B9ZVX7;Q5T8R1;A0A0A0MR85;E7EWW9;P46439;Q03013;H3BQT3;E9PLF1;E9PHN7;E9PHN6;Q5T8Q9;F6XZQ7;P28161	P09488;H3BRM6;B9ZVX7;Q5T8R1;A0A0A0MR85;E7EWW9;P46439;Q03013	Glutathione S-transferase Mu 1;Glutathione S-transferase Mu 5;Glutathione S-transferase Mu 4	GSTM1;GSTM5;GSTM4
23.3615	23.0756	23.4629	21.283	23.7273	22.9329	8	8.1	27.0395	15			0.375113	-0.652259	P14735	P14735	Insulin-degrading enzyme	IDE
24.1745	25.0857	25.0069	23.8454	24.6972	23.7609	10	24	28.3898	22			0.716512	-0.654533	Q9Y3I0	Q9Y3I0	tRNA-splicing ligase RtcB homolog	RTCB
22.0937	22.5172	22.7071	20.7035	22.6097	22.0384	6	9.4	26.2036	13			0.479972	-0.655464	Q9Y678	Q9Y678	Coatomer subunit gamma-1	COPG1
24.3028	24.567	24.8122	23.5777	24.1733	23.9324	12	12.5	28.1358	36			1.37017	-0.6662	H7C229;E7EVJ5;E7EW33;Q96F07;A0A087WZL7	H7C229;E7EVJ5;E7EW33;Q96F07	Cytoplasmic FMR1-interacting protein 2	CYFIP2
25.9026	26.4905	26.5037	25.3809	26.1864	25.3172	12	31.5	30.1112	49			0.913529	-0.670767	H0Y4R1;P12268;E7ETK5	H0Y4R1;P12268;E7ETK5	Inosine-5-monophosphate dehydrogenase 2	IMPDH2
23.7982	24.0459	23.9029	21.3559	24.0276	24.3182	9	15.1	27.6853	30			0.291793	-0.681772	A0A087WW66;Q99460;H7BZR6;H7C378;C9J9M4	A0A087WW66;Q99460	26S proteasome non-ATPase regulatory subunit 1	PSMD1
22.9166	23.307	24.0557	21.7214	23.3992	23.0915	7	8.9	27.1739	26			0.488224	-0.689082	A0AVT1;H0Y8S8	A0AVT1	Ubiquitin-like modifier-activating enzyme 6	UBA6
23.5299	23.9739	23.5097	22.7042	22.9077	23.3296	9	14.2	27.228	25			1.35379	-0.690667	Q9H0D6	Q9H0D6	5-3 exoribonuclease 2	XRN2
25.2757	25.0712	24.5338	23.4865	24.9152	24.3757	19	17.4	28.5915	52			0.675021	-0.7011	P42704;B8ZZ38;A0A0C4DG06;C9JCA9	P42704	Leucine-rich PPR motif-containing protein, mitochondrial	LRPPRC
21.4167	21.7044	22.18	21.1283	20.5397	21.5245	3	15.1	24.8474	5			0.904807	-0.70284	F5H5A1;Q4G176;H0YGC7;F5H362;F5H755;F5H3B2;H0YH37;F5H2G6	F5H5A1;Q4G176;H0YGC7;F5H362;F5H755	Acyl-CoA synthetase family member 3, mitochondrial	ACSF3
22.7447	23.3902	22.8353	20.6432	23.7641	22.432	5	14.1	26.7704	17			0.313383	-0.710306	Q9UBB4;B1AHE4	Q9UBB4	Ataxin-10	ATXN10
21.9179	21.8466	21.8106	20.3371	21.0544	22.0495	4	7.6	24.9828	6			0.645923	-0.71136	Q8TD19;G3V459	Q8TD19;G3V459	Serine/threonine-protein kinase Nek9	NEK9
27.56	28.502	27.9083	27.0137	27.6195	27.1967	8	43.7	31.6335	43			1.02006	-0.713467	Q06830;A0A0A0MSI0;A0A0A0MRQ5	Q06830;A0A0A0MSI0	Peroxiredoxin-1	PRDX1
27.6066	27.4615	27.6475	26.8634	26.804	26.9062	5	29.3	31.2881	25			3.44176	-0.713999	G3V203;H0YHA7;J3QQ67;Q07020;F8VYV2;A0A075B7A0;F8VUA6	G3V203;H0YHA7;J3QQ67;Q07020;F8VYV2;A0A075B7A0;F8VUA6	60S ribosomal protein L18	RPL18
21.7873	22.2099	22.2462	21.52	21.5229	21.031	5	9	25.4546	12			1.51829	-0.72316	J3KNP2;Q12788;A0A087WYP7	J3KNP2;Q12788	Transducin beta-like protein 3	TBL3
23.6072	24.7301	24.1045	23.5241	23.4425	23.2835	9	30	27.6672	16			1.03194	-0.730567	Q9Y617	Q9Y617	Phosphoserine aminotransferase	PSAT1
22.679	22.4312	22.196	20.6407	22.4933	21.9428	5	14.7	25.9535	10			0.585111	-0.74312	A0A087WY71;E9PFW3;Q96CW1;H7C4C3;C9JJ47	A0A087WY71;E9PFW3;Q96CW1	AP-2 complex subunit mu	AP2M1
23.078	22.9968	22.4228	20.4792	22.4852	23.3016	4	28	26.5353	10			0.35895	-0.743881	B1ALA9	B1ALA9		PRPS1
22.6614	22.6077	22.6608	21.1024	21.5715	22.9853	3	17.2	26.0881	14			0.598202	-0.75691	Q99714;Q5H928	Q99714	3-hydroxyacyl-CoA dehydrogenase type-2	HSD17B10
25.8971	26.0999	25.9887	24.9233	25.4964	25.273	12	48.9	29.4909	31			1.90616	-0.764333	P63244;J3KPE3;H0YAF8;H0Y8W2;H0YAM7;D6RAC2;D6R9Z1;D6R9L0;D6REE5;D6RFX4;D6RHH4;H0Y8R5;D6RBD0;D6RFZ9;H0Y9P0;D6RAU2;E9PD14;D6RGK8;D6R909	P63244;J3KPE3;H0YAF8;H0Y8W2;H0YAM7;D6RAC2;D6R9Z1;D6R9L0;D6REE5;D6RFX4;D6RHH4	Guanine nucleotide-binding protein subunit beta-2-like 1;Guanine nucleotide-binding protein subunit beta-2-like 1, N-terminally processed	GNB2L1
25.6738	26.2757	26.1975	24.9809	25.6335	25.2114	20	33.8	29.7104	65			1.34634	-0.773734	P47897;B4DDN1;H7C0R3;C9J165;A0A0U1RQX5;A0A0U1RQT0;A0A0U1RRC8;A0A0U1RQM8;A0A0U1RQU2;A0A0U1RRI9;A0A0U1RQE9;A0A0U1RQL2;A0A0U1RQQ5;A0A0U1RQX9;A0A0U1RR66;A0A0U1RQJ6;A0A0U1RRJ7;A0A0U1RR79;F2Z2V6	P47897;B4DDN1	Glutamine--tRNA ligase	QARS
22.8715	23.1899	23.9608	21.6139	23.0093	23.0355	4	13.7	27.0128	8			0.621269	-0.787839	O76003	O76003	Glutaredoxin-3	GLRX3
22.8606	22.5527	23.0836	21.6453	22.1616	22.3174	5	6.1	26.4644	14			1.44248	-0.79087	M0QZR4;Q92888;M0QYC1;M0R2C7;M0QYS3;M0QZH8	M0QZR4;Q92888;M0QYC1	Rho guanine nucleotide exchange factor 1	ARHGEF1
24.4462	25.1658	25.2816	23.8456	24.4723	24.1777	6	33	28.8028	19			1.18217	-0.799334	G3V295;G3V5Z7;P60900;G3V3I1;G3V3U4	G3V295;G3V5Z7;P60900;G3V3I1;G3V3U4	Proteasome subunit alpha type;Proteasome subunit alpha type-6	PSMA6
24.1622	24.0169	24.1563	23.1726	23.6509	23.1098	10	23.1	27.6465	26			1.97068	-0.8007	Q14166	Q14166	Tubulin--tyrosine ligase-like protein 12	TTLL12
22.626	23.4804	23.5743	22.1174	23.1106	22.0459	12	12.2	26.9021	19			0.811948	-0.802267	Q12769;G3V198;E9PR16	Q12769;G3V198;E9PR16	Nuclear pore complex protein Nup160	NUP160
23.4165	22.2082	23.452	21.1838	22.3281	23.1539	5	14.4	26.6371	13			0.499771	-0.803636	H0YDD4;P10515;E9PEJ4	H0YDD4;P10515;E9PEJ4	Acetyltransferase component of pyruvate dehydrogenase complex;Dihydrolipoyllysine-residue acetyltransferase component of pyruvate dehydrogenase complex, mitochondrial	DLAT
23.5754	23.5466	23.5011	21.3023	23.2664	23.6404	8	15.6	27.0656	17			0.482103	-0.804665	O94776	O94776	Metastasis-associated protein MTA2	MTA2
23.1096	24.2768	23.7544	23.0701	23.0553	22.5621	6	17	27.4762	14			1.01936	-0.817767	P38919	P38919	Eukaryotic initiation factor 4A-III;Eukaryotic initiation factor 4A-III, N-terminally processed	EIF4A3
25.0863	25.5555	25.7246	24.2471	25.0512	24.6119	14	38.1	29.0761	35			1.2766	-0.818733	P34897;H0YIZ0;G3V5L0;G3V2Y4;G3V4W5;G3V2W0;G3V540;G3V241;G3V3Y8;G3V4T0;G3V4X0;G3V2E4;G3V2Y1;G3V3C6	P34897;H0YIZ0	Serine hydroxymethyltransferase, mitochondrial;Serine hydroxymethyltransferase	SHMT2
23.6748	23.5502	23.7379	22.9511	23.039	22.5027	8	14.5	27.1026	17			2.03287	-0.823367	O75534;E9PLT0;E9PLD4;E9PNG3	O75534;E9PLT0	Cold shock domain-containing protein E1	CSDE1
25.6665	26.76	27.0135	25.4739	26.3924	25.1009	9	57.6	30.1858	33			0.662195	-0.824266	P09211;A8MX94;A0A087X2E9;A0A087X243	P09211;A8MX94	Glutathione S-transferase P	GSTP1
21.1597	22.2452	21.7063	21.4057	20.2726	20.9182	8	8.7	26.0299	14			0.858792	-0.838221	H7BXY3;Q7L2E3	H7BXY3;Q7L2E3	Putative ATP-dependent RNA helicase DHX30	DHX30
25.0066	25.6069	25.47	23.9387	24.8106	24.7881	13	29.5	29.0593	37			1.17499	-0.8487	P11413;E7EUI8;E7EM57;E9PD92	P11413;E7EUI8;E7EM57;E9PD92	Glucose-6-phosphate 1-dehydrogenase	G6PD
23.1245	23.6464	23.4599	21.7246	23.0959	22.8636	6	17.3	26.9578	11			0.877629	-0.848907	P09622;E9PEX6;F8WDM5;F2Z2E3	P09622;E9PEX6	Dihydrolipoyl dehydrogenase, mitochondrial;Dihydrolipoyl dehydrogenase	DLD
25.0656	24.9149	24.2037	23.8404	23.9834	23.8093	5	17.2	28.2017	19			1.45635	-0.850366	O75083;D6RD66	O75083;D6RD66	WD repeat-containing protein 1	WDR1
26.5604	26.4519	27.129	25.2591	26.2107	26.1171	72	21.1	30.289	165			1.08637	-0.851467	Q14204;H0YJ21	Q14204	Cytoplasmic dynein 1 heavy chain 1	DYNC1H1
24.5989	23.6581	24.0193	20.9982	24.6669	24.0367	4	36.3	27.8638	12			0.299032	-0.858163	E7EPB3;P50914	E7EPB3;P50914	60S ribosomal protein L14	RPL14
21.4922	23.4608	21.3461	21.4962	21.2274	20.9653	2	8.2	25.5149	6			0.55114	-0.870073	Q9Y295	Q9Y295	Developmentally-regulated GTP-binding protein 1	DRG1
24.2611	24.7222	24.6984	23.8415	23.8838	23.3342	6	33.1	28.1662	18			1.70907	-0.874067	O14818;H0Y586;Q8TAA3;A0A087WYS6;F5GY34	O14818;H0Y586;Q8TAA3	Proteasome subunit alpha type-7;Proteasome subunit alpha type-7-like	PSMA7;PSMA8
24.3646	24.3986	25.1785	22.4534	24.5539	24.2933	14	15.3	28.3514	42			0.546381	-0.880366	Q29RF7;H0Y9L6;H0Y9L9	Q29RF7	Sister chromatid cohesion protein PDS5 homolog A	PDS5A
23.2613	23.0088	23.5112	23.2076	21.7802	22.1253	3	27.6	26.696	12			0.915212	-0.8894	P31946	P31946	14-3-3 protein beta/alpha;14-3-3 protein beta/alpha, N-terminally processed	YWHAB
22.624	22.152	22.3016	20.891	21.8249	21.6823	7	24	26.1491	14			1.29931	-0.893131	P35998;C9JLS9	P35998	26S protease regulatory subunit 7	PSMC2
22.2259	22.2122	21.6226	20.8234	21.2612	21.2943	2	4.6	25.1959	5			1.63259	-0.893936	O94925;H7BZD1	O94925;H7BZD1	Glutaminase kidney isoform, mitochondrial	GLS
21.6614	22.3158	23.1663	20.56	22.1165	21.7711	4	15.4	25.9557	8			0.630152	-0.898617	E9PM69;R4GNH3;P17980;E9PMD8;E9PKD5;E9PN50;E9PLG2	E9PM69;R4GNH3;P17980;E9PMD8;E9PKD5;E9PN50	26S protease regulatory subunit 6A	PSMC3
23.143	23.949	24.0899	21.4459	23.6256	23.3628	5	15.3	27.3598	14			0.540965	-0.915876	P39748;I3L3E9;F5H1Y3	P39748;I3L3E9	Flap endonuclease 1	FEN1
25.6094	25.3991	25.3413	24.8039	24.6068	24.1443	5	22.6	28.8169	14			1.93181	-0.931599	P62906	P62906	60S ribosomal protein L10a	RPL10A
24.1815	23.9032	24.3922	20.7629	24.3661	24.4995	9	37.9	27.9692	20			0.315227	-0.949474	Q99536;K7ERT7;K7ESA3;K7ENX2;K7EM19;K7EJM4;K7ER81	Q99536	Synaptic vesicle membrane protein VAT-1 homolog	VAT1
22.4588	22.5096	22.5703	20.8423	22.0552	21.7748	3	18.5	26.0759	9			1.21975	-0.955468	E9PQP1;G3V0I5;P49821;E9PPS5;E9PPR0;E9PMX3;E9PPD6;E9PJL9;E9PLC6;B4DE93	E9PQP1;G3V0I5;P49821;E9PPS5;E9PPR0;E9PMX3	NADH dehydrogenase [ubiquinone] flavoprotein 1, mitochondrial	NDUFV1
20.8744	21.9968	22.8962	20.883	20.8489	21.1682	4	10.1	25.507	9			0.738472	-0.955774	Q9H9T3;B4DKA4;E5RHY2;E5RIC0;E5RIZ7;E5RHR2	Q9H9T3;B4DKA4	Elongator complex protein 3	ELP3
21.6888	22.1348	22.2169	20.864	21.447	20.8535	3	6.1	25.177	12			1.69982	-0.958642	P52888;K7EP46;K7EIK4;K7EKB6;K7EL32;K7EL02	P52888;K7EP46	Thimet oligopeptidase	THOP1
23.0016	24.2556	23.6113	22.9505	22.5227	22.5151	8	35.5	27.1584	20			1.15883	-0.960066	B5MCX3;Q15019;C9J2Q4;H7C310;H7C2Y0;C9IY94;C9IZU3;C9JQJ4;C9J938;C9JB25;B5MD47;C9JZI2	B5MCX3;Q15019;C9J2Q4;H7C310;H7C2Y0	Septin-2	37500
22.0681	21.8928	21.9816	20.6955	20.8232	21.5315	3	4.3	24.8738	5			1.65814	-0.964085	I3L0N3;P46459;I3L0L3;I3L338;I3L4Q9;I3L2G1;K7EQD6	I3L0N3;P46459;I3L0L3	Vesicle-fusing ATPase	NSF
22.0705	22.2644	22.0005	21.2808	21.0295	21.121	7	5.5	25.6055	13			3.07003	-0.968023	Q12789;H3BRD0;H3BU37	Q12789	General transcription factor 3C polypeptide 1	GTF3C1
22.7384	22.8922	22.7459	22.2097	22.7204	20.5331	5	11.7	26.134	13			0.664356	-0.971114	O43865;H0Y8B3;Q96HN2	O43865;H0Y8B3;Q96HN2	Putative adenosylhomocysteinase 2;Adenosylhomocysteinase;Putative adenosylhomocysteinase 3	AHCYL1;AHCYL2
21.8273	21.9651	21.7167	21.3488	21.1629	20.0726	4	14.7	24.8265	8			1.13348	-0.974927	Q9GZL7	Q9GZL7	Ribosome biogenesis protein WDR12	WDR12
23.5536	24.2522	23.4702	21.1148	23.3817	23.7048	7	17.7	27.3667	18			0.529887	-1.02489	Q9UHD8;K7EK18;K7EL40;K7ER52;K7EIE4;K7EQD7;K7EJZ2;K7ELJ9;K7EIR4;K7EKN4;K7EN52;K7ENQ5;K7ER14;K7ERG1;K7EQ08;K7EJ51;K7EJL9	Q9UHD8;K7EK18;K7EL40;K7ER52;K7EIE4;K7EQD7	Septin-9	40057
24.4006	23.1349	24.384	20.9827	25.0181	22.8283	7	23.2	27.8742	20			0.344276	-1.03013	Q9Y265;H7C4G5;E7ETR0;J3QLR1;H7C4I3	Q9Y265;H7C4G5;E7ETR0	RuvB-like 1	RUVBL1
23.4203	22.4536	23.8058	20.4665	23.1643	22.9414	4	22.4	27.1761	14			0.470563	-1.03583	P28066	P28066	Proteasome subunit alpha type-5	PSMA5
23.7479	24.2571	24.5769	21.798	23.8172	23.8453	7	17.9	27.9919	15			0.654269	-1.04046	Q5T5C7;P49591	Q5T5C7;P49591	Serine--tRNA ligase, cytoplasmic	SARS
22.2842	22.5897	22.3523	21.3256	21.4686	21.2062	2	26.5	25.794	9			3.07072	-1.07528	E7EQG2;Q14240;J3KSN7	E7EQG2;Q14240	Eukaryotic initiation factor 4A-II;Eukaryotic initiation factor 4A-II, N-terminally processed	EIF4A2
22.7284	23.8845	22.8174	20.9145	22.5418	22.7325	9	8.9	26.6687	15			0.720322	-1.08052	B1AKJ5;G3V1R5;A0A087WYK8;O43847;H0Y5G9;F5H7V1	B1AKJ5;G3V1R5;A0A087WYK8;O43847;H0Y5G9	Nardilysin	NRD1
22.1999	22.9224	23.4666	21.1775	22.871	21.2447	6	6.7	26.4169	8			0.760811	-1.09859	J3KR97;Q9BTW9;A0A0J9YWI5;A0A0J9YVR1;A0A0J9YVU1;I3L439;I3L120;A0A0J9YXU4;A0A0J9YYG2;I3L163	J3KR97;Q9BTW9;A0A0J9YWI5;A0A0J9YVR1	Tubulin-specific chaperone D	TBCD
25.3768	26.0384	27.284	24.8845	25.3581	25.1242	25	29.4	29.9084	59			0.900218	-1.1108	Q9P2J5;A0A087WXY1	Q9P2J5	Leucine--tRNA ligase, cytoplasmic	LARS
23.7471	23.963	23.9183	21.7909	23.2054	23.2701	7	14.9	27.2396	24			1.08157	-1.12065	Q92556;C9JIW2;C9IZR8;C9J5X3;C9JB20;H7C0N5;H7C0S6;H7C3P3	Q92556	Engulfment and cell motility protein 1	ELMO1
22.3947	22.6442	21.5127	20.5214	22.2275	20.4125	9	9.2	25.6157	18			0.764069	-1.13008	Q7KZ85	Q7KZ85	Transcription elongation factor SPT6	SUPT6H
23.8474	24.1708	23.8471	21.2284	24.1043	23.0918	11	12.8	27.7004	25			0.605323	-1.14693	P52732	P52732	Kinesin-like protein KIF11	KIF11
22.7895	22.4321	21.9728	20.9296	20.7575	21.9889	3	7.8	25.7638	8			1.21967	-1.17282	B7Z7P8;P62495	B7Z7P8;P62495	Eukaryotic peptide chain release factor subunit 1	ETF1
23.4563	24.0992	23.5098	21.2093	23.6835	22.646	11	15.6	27.2218	20			0.720423	-1.1755	P42285;H0Y8U3;H0YAC4;D6REC7	P42285	Superkiller viralicidic activity 2-like 2	SKIV2L2
22.5917	22.5014	21.2437	21.036	21.2045	20.4942	4	11.1	25.769	10			1.1642	-1.2007	E9PEB5;Q96AE4;C9JSZ1	E9PEB5;Q96AE4	Far upstream element-binding protein 1	FUBP1
22.5288	23.3898	21.7577	21.3161	21.4226	21.2988	4	8.9	25.6321	10			1.20519	-1.21289	P36915;A2AB27	P36915;A2AB27	Guanine nucleotide-binding protein-like 1	GNL1
22.6441	22.1769	21.7776	20.0917	21.6198	21.2418	2	25	25.2139	7			1.09169	-1.21509	K7EQQ9;K7ELC7;P61353	K7EQQ9;K7ELC7;P61353	60S ribosomal protein L27	RPL27
22.216	22.0296	22.1279	21.0313	20.5753	21.1164	3	12.2	25.462	9			2.63521	-1.21679	P25788;G3V3W4;G3V5N4;G3V4X5	P25788	Proteasome subunit alpha type-3	PSMA3
22.0929	22.5646	23.6766	21.9216	20.4541	22.2323	6	4.2	25.9425	9			0.794703	-1.24203	Q9H1A4;H0Y564;F8WAS1	Q9H1A4;H0Y564	Anaphase-promoting complex subunit 1	ANAPC1
22.599	23.7456	24.7378	21.6376	22.9902	22.728	12	24.2	27.4682	20			0.768863	-1.2422	Q9H4A4;A6NKB8;C9JMZ3;A0A087WU27;A0A087WUS4	Q9H4A4;A6NKB8	Aminopeptidase B	RNPEP
22.394	23.176	23.8294	21.2758	24.3204	20.0681	6	13.3	27.1211	10			0.395048	-1.24503	P52306;H0Y8M2;D6RHH8;D6REZ0	P52306	Rap1 GTPase-GDP dissociation stimulator 1	RAP1GDS1
22.6731	23.8679	23.6486	20.4153	23.1802	22.8434	8	10.9	27.1233	30			0.590948	-1.25023	O95373;E9PLB2	O95373	Importin-7	IPO7
22.8033	23.1948	23.1462	21.4712	22.6344	21.2213	3	10.1	26.5465	14			1.31683	-1.27248	J3KQ32;Q9NTK5;C9JTK6	J3KQ32;Q9NTK5	Obg-like ATPase 1	OLA1
22.7634	23.6808	23.0593	21.6226	23.2486	20.6431	7	14.6	26.8109	15			0.758129	-1.32972	P38606;C9JA17;C9JVW8	P38606	V-type proton ATPase catalytic subunit A	ATP6V1A
22.9377	22.6916	22.6822	20.1172	22.6098	21.5706	3	25.7	26.3578	11			0.854462	-1.33797	E9PKD3;E9PIR7;F8W809;A0A087WSW9;E9PNQ6;A0A087WSY9;Q16881;E9PQI3;E9PLT3;E9PKI4;A0A0B4J225;E9PIZ5;E2QRB9	E9PKD3;E9PIR7;F8W809;A0A087WSW9;E9PNQ6;A0A087WSY9;Q16881;E9PQI3;E9PLT3;E9PKI4;A0A0B4J225;E9PIZ5	Thioredoxin reductase 1, cytoplasmic	TXNRD1
24.3419	24.5648	24.4684	20.9355	24.3205	24.0636	12	8	27.9689	26			0.548736	-1.35182	Q8NI27;A0A0C4DG98;H0Y815;F2Z2V2	Q8NI27;A0A0C4DG98	THO complex subunit 2	THOC2
23.6351	24.5502	25.4069	21.0407	24.8052	23.6815	7	41.7	28.3907	14			0.479405	-1.35494	K7ENG2;P26368	K7ENG2;P26368	Splicing factor U2AF 65 kDa subunit	U2AF2
22.4157	22.6441	22.9591	21.3212	21.9556	20.6434	5	7.3	25.9986	9			1.53595	-1.36624	P78347	P78347	General transcription factor II-I	GTF2I
24.341	24.2733	24.177	20.7318	23.9788	23.9026	16	32.3	27.8588	28			0.579541	-1.39271	P43403	P43403	Tyrosine-protein kinase ZAP-70	ZAP70
22.2458	23.1371	22.3033	21.9588	19.888	21.4698	4	5.6	25.4548	5			0.992634	-1.45652	A0A087WVR3;A0A087WTW0;Q96T88;A0A087WWG9	A0A087WVR3;A0A087WTW0;Q96T88;A0A087WWG9	E3 ubiquitin-protein ligase UHRF1	UHRF1
22.777	22.6524	22.2392	21.2126	21.7625	20.0273	4	3	25.4285	5			1.35344	-1.55539	Q5SRE5;H7C4K7	Q5SRE5	Nucleoporin NUP188 homolog	NUP188
22.7316	21.7993	21.7098	19.8388	21.2483	20.4245	4	15.3	25.7293	11			1.4038	-1.57636	O14929	O14929	Histone acetyltransferase type B catalytic subunit	HAT1
22.0137	22.0539	22.636	20.2337	19.9794	21.6935	5	11.6	25.7481	9			1.31237	-1.59898	Q9NZI8;F8W930;Q9Y6M1	Q9NZI8	Insulin-like growth factor 2 mRNA-binding protein 1	IGF2BP1
22.5453	22.1762	23.138	21.853	19.5721	21.3692	3	8.1	25.7074	6			1.06031	-1.6884	F6T1Q0;Q6L8Q7	F6T1Q0;Q6L8Q7	2,5-phosphodiesterase 12	PDE12
24.1932	25.3833	26.3503	23.5875	23.5506	23.5971	44	10.9	28.7629	72			1.29968	-1.73053	A0A0A0MTR7;A0A0A0MTC1;Q63HN8	A0A0A0MTR7;A0A0A0MTC1;Q63HN8	E3 ubiquitin-protein ligase RNF213	RNF213
25.6683	26.6392	26.1914	21.5927	25.1086	25.1504	10	17.2	29.6076	24			0.849219	-2.21573	Q15437;Q5QPE2;Q5QPE1	Q15437;Q5QPE2	Protein transport protein Sec23B	SEC23B

## Sheet: Comparison probes 3 and 4
LFQ intensities												t-tests								Protein information and annotation
Probe 4 data						Probe 3 data						Probe 4				Probe 3
DMSO_A	DMSO_B	DMSO_C	probe4_A	probe4_B	probe4_C	DMSO_A	DMSO_B	DMSO_C	probe3_A	probe3_B	probe3_C	Significant	p-value	Enrichment	Global difference	Significant	p-value	Enrichment	Global difference	Protein IDs	Majority protein IDs	Protein names	Gene names	Catalytic activity	EC number	Active site	Gene ontology (biological process)	Gene ontology (molecular function)	Gene ontology (cellular component)	Gene ontology IDs
20.0254	21.4819	20.5346	26.3799	25.3719	25.8786	19.2635	19.8689	18.8705	27.654	27.7108	27.7928	+	3.60135	4.6105	5.19614	+	5.42162	7.90982	8.3849	E9PIE4	E9PIE4		MTCH2				transport [GO:0006810]		integral component of membrane [GO:0016021]	GO:0006810;GO:0016021
21.4113	20.8745	21.6168	27.0424	26.4888	26.3268	18.992	19.0259	20.8857	27.8392	27.9928	28.1525	+	4.61466	5.16514	5.31847	+	4.06485	7.65354	8.36029	H7BXI1;A0A087WXU3;A0FGR8	H7BXI1;A0A087WXU3;A0FGR8	Extended synaptotagmin-2	ESYT2				endocytosis [GO:0006897];lipid transport [GO:0006869]	cadherin binding involved in cell-cell adhesion [GO:0098641];calcium-dependent phospholipid binding [GO:0005544];calcium ion binding [GO:0005509];identical protein binding [GO:0042802];phosphatidylcholine binding [GO:0031210];phosphatidylethanolamine binding [GO:0008429];phosphatidylinositol binding [GO:0035091];lipid binding [GO:0008289];lipid binding [GO:0008289]	cell-cell adherens junction [GO:0005913];extrinsic component of cytoplasmic side of plasma membrane [GO:0031234];integral component of plasma membrane [GO:0005887];intrinsic component of endoplasmic reticulum membrane [GO:0031227];membrane [GO:0016020];organelle membrane contact site [GO:0044232];integral component of membrane [GO:0016021];integral component of membrane [GO:0016021]	GO:0005509;GO:0005544;GO:0005887;GO:0005913;GO:0006869;GO:0006897;GO:0008429;GO:0016020;GO:0031210;GO:0031227;GO:0031234;GO:0035091;GO:0042802;GO:0044232;GO:0098641;GO:0008289;GO:0016021;GO:0008289;GO:0016021
21.196	20.7731	21.5542	25.3451	24.7725	25.0468	20.1092	21.6083	20.0315	27.4143	27.7946	27.8871	+	3.70376	4.21914	3.88036	+	3.21601	7.40988	7.1157	Q9NQC3	Q9NQC3	Reticulon-4	RTN4				apoptotic process [GO:0006915];axonal fasciculation [GO:0007413];cardiac epithelial to mesenchymal transition [GO:0060317];cerebral cortex radial glia guided migration [GO:0021801];endoplasmic reticulum tubular network assembly [GO:0071787];endoplasmic reticulum tubular network organization [GO:0071786];negative regulation of axon extension [GO:0030517];negative regulation of axonogenesis [GO:005…	cadherin binding involved in cell-cell adhesion [GO:0098641];poly(A) RNA binding [GO:0044822]	cell-cell adherens junction [GO:0005913];cell projection [GO:0042995];endoplasmic reticulum [GO:0005783];endoplasmic reticulum membrane [GO:0005789];extracellular exosome [GO:0070062];integral component of endoplasmic reticulum membrane [GO:0030176];intracellular [GO:0005622];nuclear envelope [GO:0005635];plasma membrane [GO:0005886];postsynaptic density [GO:0014069]	GO:0005622;GO:0005635;GO:0005783;GO:0005789;GO:0005886;GO:0005913;GO:0006915;GO:0007413;GO:0014069;GO:0021801;GO:0030176;GO:0030308;GO:0030334;GO:0030517;GO:0042981;GO:0042995;GO:0044822;GO:0050771;GO:0051292;GO:0060317;GO:0070062;GO:0071786;GO:0071787;GO:0098641;GO:2000172
20.4779	21.2072	19.968	25.682	25.3476	25.9185	17.9681	19.4462	19.5848	25.3891	25.7217	25.8253	+	3.59947	4.72127	5.09834	+	4.21693	5.43523	6.64564	P30519;A0A087WT44;I3L159;I3L1F5;I3L1Y2;I3L4P8;A0A1B0GXH0;I3L463;I3L276	P30519;A0A087WT44;I3L159;I3L1F5	Heme oxygenase 2	HMOX2	CATALYTIC ACTIVITY: Protoheme + 3 [reduced NADPH--hemoprotein reductase] + 3 O(2) = biliverdin + Fe(2+) + CO + 3 [oxidized NADPH--hemoprotein reductase] + 3 H(2)O. {ECO:0000250|UniProtKB:O48782}.	1.14.14.18		cellular iron ion homeostasis [GO:0006879];heme catabolic process [GO:0042167];heme oxidation [GO:0006788];iron ion homeostasis [GO:0055072];response to hypoxia [GO:0001666];response to oxidative stress [GO:0006979];heme oxidation [GO:0006788];heme oxidation [GO:0006788];heme oxidation [GO:0006788];heme oxidation [GO:0006788];heme oxidation [GO:0006788];heme oxidation [GO:0006788];heme oxidation …	heme binding [GO:0020037];heme oxygenase (decyclizing) activity [GO:0004392];metal ion binding [GO:0046872];heme oxygenase (decyclizing) activity [GO:0004392];heme oxygenase (decyclizing) activity [GO:0004392];metal ion binding [GO:0046872];heme oxygenase (decyclizing) activity [GO:0004392];heme oxygenase (decyclizing) activity [GO:0004392];heme oxygenase (decyclizing) activity [GO:0004392];heme …	endoplasmic reticulum membrane [GO:0005789];membrane [GO:0016020];plasma membrane [GO:0005886];integral component of membrane [GO:0016021]	GO:0001666;GO:0004392;GO:0005789;GO:0005886;GO:0006788;GO:0006879;GO:0006979;GO:0016020;GO:0020037;GO:0042167;GO:0046872;GO:0055072;GO:0004392;GO:0006788;GO:0004392;GO:0006788;GO:0046872;GO:0004392;GO:0006788;GO:0004392;GO:0006788;GO:0004392;GO:0006788;GO:0004392;GO:0006788;GO:0046872;GO:0004392;GO:0006788;GO:0004392;GO:0006788;GO:0006979;GO:0016021
21.0122	20.5429	22.2833	24.4437	24.1875	24.238	19.7081	19.8657	18.2066	24.7558	25.5169	25.7171	+	4.43621	3.12312	3.01025	+	3.34455	5.90468	6.06983	P21964;E7EMS6;E7EUU8;H7BZ45;F8WBW9	P21964;E7EMS6;E7EUU8	Catechol O-methyltransferase	COMT	CATALYTIC ACTIVITY: S-adenosyl-L-methionine + a catechol = S-adenosyl-L-homocysteine + a guaiacol.	2.1.1.6		cellular response to phosphate starvation [GO:0016036];developmental process [GO:0032502];dopamine catabolic process [GO:0042420];estrogen metabolic process [GO:0008210];female pregnancy [GO:0007565];learning [GO:0007612];methylation [GO:0032259];multicellular organismal reproductive process [GO:0048609];negative regulation of dopamine metabolic process [GO:0045963];negative regulation of renal s…	catechol O-methyltransferase activity [GO:0016206];magnesium ion binding [GO:0000287];methyltransferase activity [GO:0008168];O-methyltransferase activity [GO:0008171];O-methyltransferase activity [GO:0008171];O-methyltransferase activity [GO:0008171];catechol O-methyltransferase activity [GO:0016206];magnesium ion binding [GO:0000287];catechol O-methyltransferase activity [GO:0016206];magnesium …	axon [GO:0030424];cell body [GO:0044297];cytosol [GO:0005829];dendritic spine [GO:0043197];extracellular exosome [GO:0070062];integral component of membrane [GO:0016021];membrane [GO:0016020];mitochondrion [GO:0005739];plasma membrane [GO:0005886];postsynaptic membrane [GO:0045211]	GO:0000287;GO:0005739;GO:0005829;GO:0005886;GO:0007565;GO:0007612;GO:0007614;GO:0008168;GO:0008171;GO:0008210;GO:0014070;GO:0016020;GO:0016021;GO:0016036;GO:0016206;GO:0030424;GO:0032259;GO:0032496;GO:0032502;GO:0035814;GO:0042135;GO:0042420;GO:0042493;GO:0043197;GO:0044297;GO:0045211;GO:0045963;GO:0048265;GO:0048609;GO:0048662;GO:0050668;GO:0051930;GO:0070062;GO:0008171;GO:0008171;GO:0000287;GO:…
20.4822	21.0138	21.9715	25.4648	25.745	26.4354	19.6018	20.2945	20.4547	25.161	25.7071	26.1677	+	3.10463	3.80436	4.72591	+	3.28703	5.73925	5.56161	J3KNF8;H3BUX2;O43169;D6RFH4;J3QR91	J3KNF8;H3BUX2;O43169;D6RFH4	Cytochrome b5 type B	CYB5B				oxidation-reduction process [GO:0055114]	heme binding [GO:0020037];metal ion binding [GO:0046872];enzyme activator activity [GO:0008047];heme binding [GO:0020037];metal ion binding [GO:0046872];heme binding [GO:0020037];metal ion binding [GO:0046872];heme binding [GO:0020037];metal ion binding [GO:0046872]	integral component of membrane [GO:0016021];membrane [GO:0016020];mitochondrial outer membrane [GO:0005741];integral component of membrane [GO:0016021];mitochondrial inner membrane [GO:0005743];mitochondrial outer membrane [GO:0005741];integral component of membrane [GO:0016021]	GO:0005741;GO:0016020;GO:0016021;GO:0020037;GO:0046872;GO:0055114;GO:0005741;GO:0005743;GO:0008047;GO:0016021;GO:0020037;GO:0046872;GO:0020037;GO:0046872;GO:0016021;GO:0020037;GO:0046872
21.2076	21.9853	20.5513	24.5739	23.9901	24.4524	20.0714	20.2046	20.4117	25.1299	25.6326	25.7651	+	3.035	2.64682	3.09073	+	4.99816	5.99255	5.27996	A0A140T9T7;Q03518	A0A140T9T7;Q03518	Antigen peptide transporter 1	TAP1				adaptive immune response [GO:0002250];antigen processing and presentation of endogenous peptide antigen via MHC class I [GO:0019885];antigen processing and presentation of endogenous peptide antigen via MHC class Ib via ER pathway, TAP-dependent [GO:0002489];antigen processing and presentation of endogenous peptide antigen via MHC class I via ER pathway, TAP-dependent [GO:0002485];antigen process…	ADP binding [GO:0043531];ATPase activity, coupled to transmembrane movement of substances [GO:0042626];ATP binding [GO:0005524];MHC class Ib protein binding [GO:0023029];peptide antigen binding [GO:0042605];peptide antigen-transporting ATPase activity [GO:0015433];peptide transporter activity [GO:0015197];protein homodimerization activity [GO:0042803];TAP1 binding [GO:0046978];TAP2 binding [GO:00…	endoplasmic reticulum membrane [GO:0005789];host cell [GO:0043657];integral component of endoplasmic reticulum membrane [GO:0030176];integral component of membrane [GO:0016021];membrane [GO:0016020];mitochondrion [GO:0005739];TAP complex [GO:0042825];TAP complex [GO:0042825]	GO:0002250;GO:0002474;GO:0002481;GO:0002485;GO:0002489;GO:0002591;GO:0005524;GO:0005739;GO:0005789;GO:0006952;GO:0015197;GO:0015433;GO:0015833;GO:0016020;GO:0016021;GO:0019060;GO:0019885;GO:0023029;GO:0030176;GO:0042605;GO:0042626;GO:0042803;GO:0042825;GO:0043531;GO:0043657;GO:0046967;GO:0046978;GO:0046979;GO:0055085;GO:0005524;GO:0015197;GO:0015440;GO:0019885;GO:0042825
19.6606	20.4577	20.9277	24.441	23.7691	23.8129	20.1776	19.1228	19.3424	24.2863	23.8125	23.834	+	3.23145	3.16043	3.65898	+	3.03189	4.21938	4.42999	P03915	P03915	NADH-ubiquinone oxidoreductase chain 5	MT-ND5	CATALYTIC ACTIVITY: NADH + ubiquinone + 5 H(+)(In) = NAD(+) + ubiquinol + 4 H(+)(Out).	1.6.5.3		mitochondrial electron transport, NADH to ubiquinone [GO:0006120];mitochondrial respiratory chain complex I assembly [GO:0032981];response to hydrogen peroxide [GO:0042542];response to hypoxia [GO:0001666];response to organonitrogen compound [GO:0010243]	NADH dehydrogenase (ubiquinone) activity [GO:0008137]	integral component of membrane [GO:0016021];mitochondrial inner membrane [GO:0005743];mitochondrial respiratory chain complex I [GO:0005747];neuron projection [GO:0043005]	GO:0001666;GO:0005743;GO:0005747;GO:0006120;GO:0008137;GO:0010243;GO:0016021;GO:0032981;GO:0042542;GO:0043005
23.4123	23.4358	23.4373	27.9338	27.3644	27.4684	24.449	24.3442	24.0687	28.0231	28.144	28.4403	+	4.72891	4.16037	4.1604	+	4.69679	3.9152	3.91517	P50416;H3BMD2;H3BP22;H3BUV7;H3BUJ0;Q92523	P50416	Carnitine O-palmitoyltransferase 1, liver isoform	CPT1A	CATALYTIC ACTIVITY: Palmitoyl-CoA + L-carnitine = CoA + L-palmitoylcarnitine. {ECO:0000269|PubMed:11350182, ECO:0000269|PubMed:14517221}.;CATALYTIC ACTIVITY: Palmitoyl-CoA + L-carnitine = CoA + L-palmitoylcarnitine.	2.3.1.21;2.3.1.21	ACT_SITE 473 473 Proton acceptor. {ECO:0000250}.;ACT_SITE 473 473 Proton acceptor. {ECO:0000250}.	carnitine metabolic process [GO:0009437];carnitine shuttle [GO:0006853];cellular response to fatty acid [GO:0071398];circadian rhythm [GO:0007623];eating behavior [GO:0042755];epithelial cell differentiation [GO:0030855];fatty acid beta-oxidation [GO:0006635];glucose metabolic process [GO:0006006];long-chain fatty acid metabolic process [GO:0001676];positive regulation of fatty acid beta-oxidatio…	carnitine O-palmitoyltransferase activity [GO:0004095];palmitoleoyltransferase activity [GO:1990698];carnitine O-palmitoyltransferase activity [GO:0004095];transferase activity, transferring acyl groups [GO:0016746];transferase activity, transferring acyl groups [GO:0016746]	integral component of mitochondrial outer membrane [GO:0031307];membrane [GO:0016020];mitochondrial inner membrane [GO:0005743];mitochondrial outer membrane [GO:0005741];mitochondrion [GO:0005739];integral component of membrane [GO:0016021];mitochondrial outer membrane [GO:0005741];mitochondrion [GO:0005739];integral component of membrane [GO:0016021]	GO:0001676;GO:0004095;GO:0005739;GO:0005741;GO:0005743;GO:0006006;GO:0006635;GO:0006641;GO:0006853;GO:0007623;GO:0009437;GO:0014070;GO:0016020;GO:0030855;GO:0031307;GO:0032000;GO:0042493;GO:0042755;GO:0050796;GO:0051260;GO:0071398;GO:1990698;GO:0004095;GO:0005739;GO:0005741;GO:0006635;GO:0006853;GO:0016021;GO:0016021;GO:0016746;GO:0016746
20.5438	20.1935	20.9829	26.2018	25.1617	26.9585	19.0361	19.2384	18.8477	22.1946	23.0292	22.9206	+	3.29172	5.36383	5.53391	+	2.37506	2.5144	3.67406	Q9NUJ1	Q9NUJ1	Mycophenolic acid acyl-glucuronide esterase, mitochondrial	ABHD10	CATALYTIC ACTIVITY: Mycophenolic acid O-acyl-glucuronide + H(2)O = mycophenolate + D-glucuronate. {ECO:0000269|PubMed:22294686}.	3.1.1.93	ACT_SITE 152 152 Charge relay system. {ECO:0000250}.;ACT_SITE 249 249 Charge relay system. {ECO:0000250}.;ACT_SITE 279 279 Charge relay system. {ECO:0000250}.	cellular glucuronidation [GO:0052695];glucuronoside catabolic process [GO:0019391]	hydrolase activity, hydrolyzing O-glycosyl compounds [GO:0004553];mycophenolic acid acyl-glucuronide esterase activity [GO:0102390]	cytosol [GO:0005829];mitochondrial matrix [GO:0005759];mitochondrion [GO:0005739]	GO:0004553;GO:0005739;GO:0005759;GO:0005829;GO:0019391;GO:0052695;GO:0102390
25.202	25.1713	24.5722	27.39	27.1998	27.631	25.0154	24.9531	24.9093	28.2102	28.4087	28.6698	+	3.26784	2.4251	2.4251	+	4.84601	3.47033	3.4703	P16615;H7C5W9;O14983;H3BVB2;A0A0C4DH86;J3QSY6;H3BTW4	P16615;H7C5W9	Sarcoplasmic/endoplasmic reticulum calcium ATPase 2	ATP2A2	CATALYTIC ACTIVITY: ATP + H(2)O + Ca(2+)(Side 1) = ADP + phosphate + Ca(2+)(Side 2).;CATALYTIC ACTIVITY: ATP + H(2)O + Ca(2+)(Side 1) = ADP + phosphate + Ca(2+)(Side 2).	3.6.3.8;3.6.3.8	ACT_SITE 351 351 4-aspartylphosphate intermediate. {ECO:0000250|UniProtKB:P04191}.;ACT_SITE 351 351 4-aspartylphosphate intermediate. {ECO:0000250|UniProtKB:P04191}.	apoptotic mitochondrial changes [GO:0008637];calcium ion import [GO:0070509];calcium ion transport [GO:0006816];intrinsic apoptotic signaling pathway in response to endoplasmic reticulum stress [GO:0070059];ion transmembrane transport [GO:0034220];maintenance of mitochondrion location [GO:0051659];negative regulation of endoplasmic reticulum calcium ion concentration [GO:0032471];negative regulat…	ATP binding [GO:0005524];calcium ion binding [GO:0005509];calcium-transporting ATPase activity [GO:0005388];protein homodimerization activity [GO:0042803];ATP binding [GO:0005524];calcium ion binding [GO:0005509];calcium-transporting ATPase activity [GO:0005388];calcium-transporting ATPase activity involved in regulation of cardiac muscle cell membrane potential [GO:0086039];enzyme binding [GO:00…	calcium channel complex [GO:0034704];endoplasmic reticulum-Golgi intermediate compartment [GO:0005793];endoplasmic reticulum membrane [GO:0005789];H zone [GO:0031673];I band [GO:0031674];integral component of membrane [GO:0016021];integral component of plasma membrane [GO:0005887];membrane [GO:0016020];mitochondrion [GO:0005739];perinuclear region of cytoplasm [GO:0048471];platelet dense tubular …	GO:0005388;GO:0005509;GO:0005524;GO:0005739;GO:0005789;GO:0005793;GO:0005887;GO:0006816;GO:0006942;GO:0008637;GO:0016020;GO:0016021;GO:0016529;GO:0031095;GO:0031448;GO:0031673;GO:0031674;GO:0032470;GO:0032471;GO:0033017;GO:0034220;GO:0034704;GO:0034976;GO:0042803;GO:0045988;GO:0048471;GO:0051561;GO:0051659;GO:0070059;GO:0070509;GO:0090076;GO:1903779;GO:0002026;GO:0005388;GO:0005509;GO:0005524;GO:…
21.0623	20.7516	20.2369	24.6968	24.7637	25.028	19.3987	19.2637	19.9543	22.066	22.4112	22.2752	+	4.57539	3.40616	4.14592	+	3.62775	2.60568	2.71189	A0A0G2JJD3;O95870;A0A0G2JI89;F2Z3H2;F2Z3G6	A0A0G2JJD3;O95870	Abhydrolase domain-containing protein 16A	ABHD16A		3.-.-.-	ACT_SITE 355 355 Charge relay system. {ECO:0000250}.;ACT_SITE 430 430 Charge relay system. {ECO:0000250}.;ACT_SITE 507 507 Charge relay system. {ECO:0000250}.	monoacylglycerol catabolic process [GO:0052651];prostaglandin catabolic process [GO:1905344]	acylglycerol lipase activity [GO:0047372]	integral component of membrane [GO:0016021];integral component of membrane [GO:0016021]	GO:0016021;GO:0047372;GO:0052651;GO:1905344;GO:0016021
21.9166	20.678	20.7706	24.1838	24.7192	23.3752	19.4216	20.0809	19.1516	22.0631	21.9418	22.1998	+	2.71311	3.07267	2.97098	+	3.70411	3.12169	2.51688	Q01469;I6L8B7;A8MUU1	Q01469;I6L8B7	Fatty acid-binding protein, epidermal	FABP5				epidermis development [GO:0008544];glucose metabolic process [GO:0006006];glucose transport [GO:0015758];lipid metabolic process [GO:0006629];phosphatidylcholine biosynthetic process [GO:0006656];response to wounding [GO:0009611];triglyceride catabolic process [GO:0019433]	fatty acid binding [GO:0005504];lipid binding [GO:0008289];transporter activity [GO:0005215];lipid binding [GO:0008289];transporter activity [GO:0005215];lipid binding [GO:0008289];transporter activity [GO:0005215]	cytoplasm [GO:0005737];cytosol [GO:0005829];extracellular exosome [GO:0070062];nucleoplasm [GO:0005654]	GO:0005215;GO:0005504;GO:0005654;GO:0005737;GO:0005829;GO:0006006;GO:0006629;GO:0006656;GO:0008289;GO:0008544;GO:0009611;GO:0015758;GO:0019433;GO:0070062;GO:0005215;GO:0008289;GO:0005215;GO:0008289
20.0723	20.7654	19.8814	28.7529	27.5021	27.915	20.9902	20.737	20.2063	19.8823	19.3553	18.9392	+	4.22408	6.97429	7.81697		2.09062	-1.1959	-1.25223	Q9NQR4;H7C579;F8WF70	Q9NQR4;H7C579	Omega-amidase NIT2	NIT2	CATALYTIC ACTIVITY: A monoamide of a dicarboxylate + H(2)O = a dicarboxylate + NH(3).	3.5.1.3	ACT_SITE 43 43 Proton acceptor. {ECO:0000255|PROSITE-ProRule:PRU00054}.;ACT_SITE 112 112 Proton donor. {ECO:0000255|PROSITE-ProRule:PRU00054}.;ACT_SITE 153 153 Nucleophile. {ECO:0000255|PROSITE-ProRule:PRU00054}.	asparagine metabolic process [GO:0006528];glutamine metabolic process [GO:0006541];oxaloacetate metabolic process [GO:0006107];nitrogen compound metabolic process [GO:0006807];nitrogen compound metabolic process [GO:0006807]	omega-amidase activity [GO:0050152];hydrolase activity, acting on carbon-nitrogen (but not peptide) bonds [GO:0016810];hydrolase activity, acting on carbon-nitrogen (but not peptide) bonds [GO:0016810]	centrosome [GO:0005813];cytoplasm [GO:0005737];extracellular exosome [GO:0070062];mitochondrion [GO:0005739]	GO:0005737;GO:0005739;GO:0005813;GO:0006107;GO:0006528;GO:0006541;GO:0050152;GO:0070062;GO:0006807;GO:0016810;GO:0006807;GO:0016810
21.0172	20.3709	21.0014	28.2264	26.7807	28.219	19.2681	19.636	19.772	20.0649	20.6957	20.8549	+	3.6187	6.68296	6.94552		NaN	NaN	0.979787	Q86X76	Q86X76	Nitrilase homolog 1	NIT1		3.5.-.-	ACT_SITE 86 86 Proton acceptor. {ECO:0000255|PROSITE-ProRule:PRU00054}.;ACT_SITE 161 161 Proton donor. {ECO:0000255|PROSITE-ProRule:PRU00054}.;ACT_SITE 203 203 Nucleophile. {ECO:0000255|PROSITE-ProRule:PRU00054}.	nitrogen compound metabolic process [GO:0006807]	nitrilase activity [GO:0000257]	extracellular exosome [GO:0070062];mitochondrion [GO:0005739];nucleus [GO:0005634]	GO:0000257;GO:0005634;GO:0005739;GO:0006807;GO:0070062
21.4276	21.0319	20.2812	27.9234	27.1999	27.12	19.4069	20.3081	19.9388	19.3419	19.0444	20.1369	+	4.41466	6.88351	6.50089		NaN	NaN	-0.376886	Q9H3G5;H7C0X5;H7C218;C9JLV0;C9JI22	Q9H3G5;H7C0X5	Probable serine carboxypeptidase CPVL	CPVL		3.4.16.-;3.4.16.-;3.4.16.-	ACT_SITE 204 204 {ECO:0000255|PROSITE-ProRule:PRU10074}.;ACT_SITE 388 388 {ECO:0000255|PROSITE-ProRule:PRU10074}.;ACT_SITE 448 448 {ECO:0000255|PROSITE-ProRule:PRU10074}.	proteolysis involved in cellular protein catabolic process [GO:0051603]	serine-type carboxypeptidase activity [GO:0004185];serine-type carboxypeptidase activity [GO:0004185];serine-type carboxypeptidase activity [GO:0004185];serine-type carboxypeptidase activity [GO:0004185];serine-type carboxypeptidase activity [GO:0004185]	extracellular exosome [GO:0070062]	GO:0004185;GO:0051603;GO:0070062;GO:0004185;GO:0004185;GO:0004185;GO:0004185
20.6023	21.2969	21.4388	27.0126	26.4698	26.2383	18.9086	20.5348	19.931	19.5886	19.824	19.4059	+	3.48957	5.56712	5.46093		NaN	NaN	-0.18529	A0A087X1K9;O75608;E5RGR0;E5RJ48;B4DP64;E5RI35	A0A087X1K9;O75608;E5RGR0;E5RJ48;B4DP64	Acyl-protein thioesterase 1	LYPLA1	CATALYTIC ACTIVITY: Palmitoyl-protein + H(2)O = palmitate + protein. {ECO:0000269|PubMed:22399288}.	3.1.2.-	ACT_SITE 119 119 Charge relay system. {ECO:0000305|PubMed:11080636}.;ACT_SITE 174 174 Charge relay system. {ECO:0000305|PubMed:11080636}.;ACT_SITE 208 208 Charge relay system. {ECO:0000305|PubMed:11080636}.	fatty acid metabolic process [GO:0006631];negative regulation of Golgi to plasma membrane protein transport [GO:0042997];protein depalmitoylation [GO:0002084];regulation of nitric-oxide synthase activity [GO:0050999]	lipase activity [GO:0016298];lysophospholipase activity [GO:0004622];palmitoyl-(protein) hydrolase activity [GO:0008474];hydrolase activity [GO:0016787];hydrolase activity [GO:0016787];hydrolase activity [GO:0016787];hydrolase activity [GO:0016787];hydrolase activity [GO:0016787]	cytoplasm [GO:0005737];cytosol [GO:0005829];extracellular exosome [GO:0070062];mitochondrion [GO:0005739]	GO:0002084;GO:0004622;GO:0005737;GO:0005739;GO:0005829;GO:0006631;GO:0008474;GO:0016298;GO:0042997;GO:0050999;GO:0070062;GO:0016787;GO:0016787;GO:0016787;GO:0016787;GO:0016787
19.9202	19.4701	20.8099	25.5765	24.1811	25.1728	22.2427	22.0959	21.389	22.3834	22.9012	23.0942	+	2.29358	3.73759	4.91004		1.22693	0.883733	0.883733	P50502;H7C3I1;Q3KNR6;F6VDH7;Q8IZP2;Q8NFI4;F8WAQ7	P50502;H7C3I1;Q3KNR6;F6VDH7;Q8IZP2;Q8NFI4	Hsc70-interacting protein;Putative protein FAM10A4;Putative protein FAM10A5	ST13;ST13P4;ST13P5				chaperone cofactor-dependent protein refolding [GO:0070389];negative regulation of protein refolding [GO:0061084];protein folding [GO:0006457];protein homooligomerization [GO:0051260]	dATP binding [GO:0032564];protein binding, bridging [GO:0030674]	cytoplasm [GO:0005737];cytosol [GO:0005829];extracellular exosome [GO:0070062];protein complex [GO:0043234];cytoplasm [GO:0005737];cytoplasm [GO:0005737];extracellular exosome [GO:0070062];cytoplasm [GO:0005737];cytoplasm [GO:0005737]	GO:0005737;GO:0005829;GO:0006457;GO:0030674;GO:0032564;GO:0043234;GO:0051260;GO:0061084;GO:0070062;GO:0070389;GO:0005737;GO:0005737;GO:0070062;GO:0005737;GO:0005737
24.21	23.563	23.7894	29.139	27.8023	28.3032	24.168	24.4476	24.3803	24.6505	24.3851	24.1354	+	3.33563	4.5607	4.5607		0.124977	0.0583668	0.0583668	P10768;X6RA14;H7BZT7;U3KQT1	P10768;X6RA14;H7BZT7;U3KQT1	S-formylglutathione hydrolase	ESD	CATALYTIC ACTIVITY: S-formylglutathione + H(2)O = glutathione + formate. {ECO:0000269|PubMed:4768551}.;CATALYTIC ACTIVITY: 4-methylumbelliferyl acetate + H(2)O = 4-methylumbelliferone + acetate. {ECO:0000269|PubMed:4768551}.;CATALYTIC ACTIVITY: S-formylglutathione + H(2)O = glutathione + formate. {ECO:0000256|RuleBase:RU363068}.;CATALYTIC ACTIVITY: S-formylglutathione + H(2)O = glutathione + form…	3.1.2.12;3.1.1.56;3.1.2.12;3.1.2.12	ACT_SITE 149 149 Charge relay system. {ECO:0000269|PubMed:19126594}.;ACT_SITE 226 226 Charge relay system. {ECO:0000269|PubMed:19126594}.;ACT_SITE 260 260 Charge relay system. {ECO:0000269|PubMed:19126594}.	formaldehyde catabolic process [GO:0046294];glutathione derivative biosynthetic process [GO:1901687];formaldehyde catabolic process [GO:0046294];formaldehyde catabolic process [GO:0046294];formaldehyde catabolic process [GO:0046294]	carboxylic ester hydrolase activity [GO:0052689];hydrolase activity, acting on ester bonds [GO:0016788];identical protein binding [GO:0042802];methylumbelliferyl-acetate deacetylase activity [GO:0047374];S-formylglutathione hydrolase activity [GO:0018738];carboxylic ester hydrolase activity [GO:0052689];S-formylglutathione hydrolase activity [GO:0018738];S-formylglutathione hydrolase activity [GO…	cytoplasmic vesicle [GO:0031410];endoplasmic reticulum lumen [GO:0005788];extracellular exosome [GO:0070062];cytoplasm [GO:0005737];cytoplasm [GO:0005737]	GO:0005788;GO:0016788;GO:0018738;GO:0031410;GO:0042802;GO:0046294;GO:0047374;GO:0052689;GO:0070062;GO:1901687;GO:0005737;GO:0018738;GO:0046294;GO:0052689;GO:0018738;GO:0046294;GO:0005737;GO:0018738;GO:0046294;GO:0052689
20.3713	20.7899	21.3229	25.7287	24.3666	25.7529	22.7482	22.8889	22.8333	23.2631	22.6738	22.8364	+	2.78069	4.55239	4.45473		0.21782	0.100966	0.100966	P08670;B0YJC4;B0YJC5;Q5JVS8;A0A1B0GTT5;A0A1B0GUA0;A0A1B0GVG8;H7C5W5;F8W835;E7EMV2;E7ESP9;P41219;Q16352;P07196;P07197	P08670;B0YJC4;B0YJC5	Vimentin	VIM				cell differentiation [GO:0030154];neurofilament cytoskeleton organization [GO:0060052];substantia nigra development [GO:0021762];axon development [GO:0061564];neurofilament bundle assembly [GO:0033693];anterograde axonal transport [GO:0008089];axonal transport of mitochondrion [GO:0019896];cerebral cortex development [GO:0021987];hippocampus development [GO:0021766];intermediate filament organiza…	structural constituent of cytoskeleton [GO:0005200];microtubule binding [GO:0008017];structural constituent of cytoskeleton [GO:0005200];identical protein binding [GO:0042802];protein binding, bridging [GO:0030674];protein C-terminus binding [GO:0008022];Ras guanyl-nucleotide exchange factor activity [GO:0005088];structural constituent of cytoskeleton [GO:0005200];structural molecule activity [GO…	cytoplasmic ribonucleoprotein granule [GO:0036464];extracellular space [GO:0005615];intermediate filament cytoskeleton [GO:0045111];myelin sheath [GO:0043209];neurofilament [GO:0005883];nuclear membrane [GO:0031965];nucleoplasm [GO:0005654];axon [GO:0030424];neurofibrillary tangle [GO:0097418];neurofilament [GO:0005883];axon [GO:0030424];axon cytoplasm [GO:1904115];cytoplasm [GO:0005737];cytosol …	GO:0005200;GO:0005615;GO:0005654;GO:0005883;GO:0021762;GO:0030154;GO:0031965;GO:0036464;GO:0043209;GO:0045111;GO:0060052;GO:0005200;GO:0005883;GO:0008017;GO:0030424;GO:0033693;GO:0061564;GO:0097418;GO:0000165;GO:0000226;GO:0005088;GO:0005200;GO:0005737;GO:0005829;GO:0005883;GO:0008022;GO:0008089;GO:0008090;GO:0009636;GO:0014012;GO:0019896;GO:0021510;GO:0021766;GO:0021987;GO:0030424;GO:0030426;GO:…
20.6621	20.8274	20.5278	25.1898	24.3115	24.9722	18.8674	19.5505	19.4651	21.1546	20.2181	18.7777	+	3.50835	3.7223	4.15204		NaN	NaN	0.755779	E9PIA8;P50897;Q5T0S4;E9PMG2;E9PSE5	E9PIA8;P50897;Q5T0S4;E9PMG2	Palmitoyl-protein thioesterase 1	PPT1	CATALYTIC ACTIVITY: Palmitoyl-[protein] + H(2)O = palmitate + [protein]. {ECO:0000250|UniProtKB:P45478}.	3.1.2.22	ACT_SITE 115 115 {ECO:0000250|UniProtKB:P45478}.;ACT_SITE 233 233 {ECO:0000250|UniProtKB:P45478}.;ACT_SITE 289 289 {ECO:0000250|UniProtKB:P45478}.	adult locomotory behavior [GO:0008344];associative learning [GO:0008306];brain development [GO:0007420];cellular protein catabolic process [GO:0044257];chemical synaptic transmission [GO:0007268];cofactor metabolic process [GO:0051186];cofactor transport [GO:0051181];grooming behavior [GO:0007625];lipid catabolic process [GO:0016042];long-chain fatty-acyl-CoA biosynthetic process [GO:0035338];lys…	palmitoyl-(protein) hydrolase activity [GO:0008474];palmitoyl-CoA hydrolase activity [GO:0016290];palmitoyl-(protein) hydrolase activity [GO:0008474];palmitoyl-(protein) hydrolase activity [GO:0008474];palmitoyl-(protein) hydrolase activity [GO:0008474];palmitoyl-(protein) hydrolase activity [GO:0008474]	axon [GO:0030424];cytosol [GO:0005829];dendrite [GO:0030425];extracellular exosome [GO:0070062];extracellular region [GO:0005576];extracellular space [GO:0005615];Golgi apparatus [GO:0005794];lysosomal lumen [GO:0043202];lysosome [GO:0005764];membrane [GO:0016020];membrane raft [GO:0045121];neuronal cell body [GO:0043025];nucleus [GO:0005634];synaptic vesicle [GO:0008021]	GO:0002084;GO:0005576;GO:0005615;GO:0005634;GO:0005764;GO:0005794;GO:0005829;GO:0006898;GO:0006907;GO:0007042;GO:0007268;GO:0007269;GO:0007399;GO:0007420;GO:0007601;GO:0007625;GO:0008021;GO:0008306;GO:0008344;GO:0008474;GO:0015031;GO:0016020;GO:0016042;GO:0016290;GO:0030149;GO:0030163;GO:0030308;GO:0030424;GO:0030425;GO:0031579;GO:0032429;GO:0035338;GO:0043025;GO:0043066;GO:0043202;GO:0043524;GO:…
21.3194	24.9028	24.5722	28.1968	27.1738	27.5498	24.4326	24.6187	24.3732	23.8608	23.7246	23.8262	+	1.49838	4.14328	4.04199		2.86595	-0.670966	-0.670966	P49189	P49189	4-trimethylaminobutyraldehyde dehydrogenase	ALDH9A1	CATALYTIC ACTIVITY: 4-trimethylammoniobutanal + NAD(+) + H(2)O = 4-trimethylammoniobutanoate + NADH.;CATALYTIC ACTIVITY: An aldehyde + NAD(+) + H(2)O = a carboxylate + NADH.;CATALYTIC ACTIVITY: 4-aminobutanal + NAD(+) + H(2)O = 4-aminobutanoate + NADH.	1.2.1.47;1.2.1.3;1.2.1.19	ACT_SITE 254 254 Proton acceptor. {ECO:0000255|PROSITE-ProRule:PRU10007, ECO:0000255|PROSITE-ProRule:PRU10008}.;ACT_SITE 288 288 Nucleophile. {ECO:0000255|PROSITE-ProRule:PRU10007, ECO:0000255|PROSITE-ProRule:PRU10008}.	carnitine biosynthetic process [GO:0045329];cellular aldehyde metabolic process [GO:0006081];hormone metabolic process [GO:0042445];neurotransmitter biosynthetic process [GO:0042136];oxidation-reduction process [GO:0055114]	1-pyrroline dehydrogenase activity [GO:0033737];3-chloroallyl aldehyde dehydrogenase activity [GO:0004028];4-trimethylammoniobutyraldehyde dehydrogenase activity [GO:0047105];aldehyde dehydrogenase (NAD) activity [GO:0004029];aminobutyraldehyde dehydrogenase activity [GO:0019145]	cytoplasm [GO:0005737];cytosol [GO:0005829];extracellular exosome [GO:0070062]	GO:0004028;GO:0004029;GO:0005737;GO:0005829;GO:0006081;GO:0019145;GO:0033737;GO:0042136;GO:0042445;GO:0045329;GO:0047105;GO:0055114;GO:0070062
21.0233	20.6167	20.3213	25.2147	24.2476	24.1456	17.9326	19.6186	19.5742	19.6448	19.686	19.9529	+	2.8814	3.66678	3.8822		NaN	NaN	0.719432	Q8NEL9;A0A087X0H7	Q8NEL9;A0A087X0H7	Phospholipase DDHD1	DDHD1		3.1.1.-	ACT_SITE 537 537 {ECO:0000250}.	lipid catabolic process [GO:0016042];phosphatidic acid biosynthetic process [GO:0006654];positive regulation of mitochondrial fission [GO:0090141]	metal ion binding [GO:0046872];phospholipase activity [GO:0004620];metal ion binding [GO:0046872]	cytoplasm [GO:0005737];cytosol [GO:0005829]	GO:0004620;GO:0005737;GO:0005829;GO:0006654;GO:0016042;GO:0046872;GO:0090141;GO:0046872
20.3615	21.3698	21.4896	25.0712	24.5589	24.8448	19.5886	19.4567	19.1884	19.2803	19.5169	19.1716	+	2.87562	3.48451	3.75135		NaN	NaN	-0.0882969	Q5VST6	Q5VST6	Alpha/beta hydrolase domain-containing protein 17B	ABHD17B		3.-.-.-	ACT_SITE 170 170 Charge relay system. {ECO:0000250}.;ACT_SITE 235 235 Charge relay system. {ECO:0000250}.;ACT_SITE 264 264 Charge relay system. {ECO:0000250}.		hydrolase activity [GO:0016787]	extracellular region [GO:0005576];membrane [GO:0016020]	GO:0005576;GO:0016020;GO:0016787
20.0645	21.5509	22.0406	25.0885	24.5096	24.8103	24.2345	24.3562	24.1819	24.6506	24.6723	24.6887	+	2.91378	3.45589	3.58415		2.84149	0.413034	0.413	E9PLL6;P46776;E9PJD9;E9PLX7	E9PLL6;P46776;E9PJD9	60S ribosomal protein L27a	RPL27A				nuclear-transcribed mRNA catabolic process, nonsense-mediated decay [GO:0000184];rRNA processing [GO:0006364];SRP-dependent cotranslational protein targeting to membrane [GO:0006614];translation [GO:0006412];translational initiation [GO:0006413];viral transcription [GO:0019083];translation [GO:0006412];translation [GO:0006412]	poly(A) RNA binding [GO:0044822];RNA binding [GO:0003723];structural constituent of ribosome [GO:0003735];structural constituent of ribosome [GO:0003735];structural constituent of ribosome [GO:0003735]	cytosol [GO:0005829];cytosolic large ribosomal subunit [GO:0022625];membrane [GO:0016020];ribosome [GO:0005840];ribosome [GO:0005840]	GO:0000184;GO:0003723;GO:0003735;GO:0005829;GO:0006364;GO:0006412;GO:0006413;GO:0006614;GO:0016020;GO:0019083;GO:0022625;GO:0044822;GO:0003735;GO:0005840;GO:0006412;GO:0003735;GO:0005840;GO:0006412
20.9094	21.2052	19.9387	24.1049	24.3068	24.1836	19.8923	19.7035	19.6417	20.8879	19.9081	19.8407	+	2.48836	3.08122	3.514		NaN	NaN	0.466426	Q9Y6G9;E9PHI6;C9JGM7	Q9Y6G9;E9PHI6	Cytoplasmic dynein 1 light intermediate chain 1	DYNC1LI1				cell division [GO:0051301];microtubule-based movement [GO:0007018];mitotic nuclear division [GO:0007067];positive regulation of mitotic cell cycle spindle assembly checkpoint [GO:0090267];transport [GO:0006810];viral process [GO:0016032];microtubule-based movement [GO:0007018];microtubule-based movement [GO:0007018]	ATP binding [GO:0005524];dynein heavy chain binding [GO:0045504];GDP binding [GO:0019003];microtubule motor activity [GO:0003777];poly(A) RNA binding [GO:0044822];microtubule motor activity [GO:0003777];microtubule motor activity [GO:0003777]	centrosome [GO:0005813];condensed chromosome kinetochore [GO:0000777];cytoplasm [GO:0005737];cytoplasmic dynein complex [GO:0005868];kinetochore [GO:0000776];membrane [GO:0016020];microtubule [GO:0005874];nucleoplasm [GO:0005654];plasma membrane [GO:0005886];spindle pole [GO:0000922];centrosome [GO:0005813];cytoplasm [GO:0005737];cytoplasmic dynein complex [GO:0005868];nucleoplasm [GO:0005654];pl…	GO:0000776;GO:0000777;GO:0000922;GO:0003777;GO:0005524;GO:0005654;GO:0005737;GO:0005813;GO:0005868;GO:0005874;GO:0005886;GO:0006810;GO:0007018;GO:0007067;GO:0016020;GO:0016032;GO:0019003;GO:0044822;GO:0045504;GO:0051301;GO:0090267;GO:0003777;GO:0005654;GO:0005737;GO:0005813;GO:0005868;GO:0005886;GO:0007018;GO:0003777;GO:0005868;GO:0007018
20.781	20.4074	21.0148	24.1755	23.9437	24.0505	19.309	19.5702	19.0157	20.3073	20.4261	20.0928	+	3.92022	3.23856	3.32219		NaN	NaN	0.977128	Q99081;H0YNQ5;B4DZP2	Q99081;H0YNQ5	Transcription factor 12	TCF12				immune response [GO:0006955];muscle organ development [GO:0007517];positive regulation of neuron differentiation [GO:0045666];positive regulation of transcription from RNA polymerase II promoter [GO:0045944];regulation of transcription from RNA polymerase II promoter [GO:0006357]	bHLH transcription factor binding [GO:0043425];cAMP response element binding [GO:0035497];E-box binding [GO:0070888];enhancer binding [GO:0035326];protein heterodimerization activity [GO:0046982];protein homodimerization activity [GO:0042803];RNA polymerase II core promoter proximal region sequence-specific DNA binding [GO:0000978];SMAD binding [GO:0046332];transcriptional activator activity, RNA…	cytoplasm [GO:0005737];nuclear chromatin [GO:0000790];nucleus [GO:0005634];RNA polymerase II transcription factor complex [GO:0090575]	GO:0000790;GO:0000978;GO:0001077;GO:0003700;GO:0005634;GO:0005737;GO:0006357;GO:0006955;GO:0007517;GO:0008134;GO:0035326;GO:0035497;GO:0042803;GO:0043425;GO:0045666;GO:0045944;GO:0046332;GO:0046982;GO:0070888;GO:0090575
20.3606	21.8307	20.2402	24.3388	22.8559	24.7089	19.5063	19.8098	18.0372	20.4369	20.5335	19.1355	+	1.92325	2.80956	3.15735		NaN	NaN	0.917572	Q96IU4;B4DQI4;F8W9U3	Q96IU4;B4DQI4;F8W9U3	Alpha/beta hydrolase domain-containing protein 14B	ABHD14B		3.-.-.-	ACT_SITE 111 111 Charge relay system. {ECO:0000250}.;ACT_SITE 162 162 Charge relay system. {ECO:0000250}.;ACT_SITE 188 188 Charge relay system. {ECO:0000250}.	3'-phosphoadenosine 5'-phosphosulfate metabolic process [GO:0050427];positive regulation of transcription from RNA polymerase II promoter [GO:0045944]	hydrolase activity [GO:0016787];hydrolase activity [GO:0016787]	cytoplasm [GO:0005737];cytosol [GO:0005829];extracellular exosome [GO:0070062];nucleolus [GO:0005730];nucleus [GO:0005634];cytoplasm [GO:0005737];nucleolus [GO:0005730];nucleus [GO:0005634]	GO:0005634;GO:0005730;GO:0005737;GO:0005829;GO:0016787;GO:0045944;GO:0050427;GO:0070062;GO:0016787;GO:0005634;GO:0005730;GO:0005737
20.8388	20.1045	21.1766	23.8454	23.2402	24.0296	19.2039	20.0385	20.6278	19.5521	20.0469	19.6586	+	2.57911	2.7296	2.99843		NaN	NaN	-0.204213	Q7Z4Q2	Q7Z4Q2	HEAT repeat-containing protein 3	HEATR3				protein import into nucleus [GO:0006606];ribosomal large subunit biogenesis [GO:0042273]	unfolded protein binding [GO:0051082]	intracellular [GO:0005622]	GO:0005622;GO:0006606;GO:0042273;GO:0051082
21.0242	21.1283	20.6525	23.5983	24.1908	23.8578	23.3744	23.4243	23.389	23.5196	23.6425	23.5869	+	4.14173	3.09225	2.94731		2.08346	0.187134	0.187101	P62913;Q5VVC8;Q5VVC9	P62913;Q5VVC8;Q5VVC9	60S ribosomal protein L11	RPL11				nuclear-transcribed mRNA catabolic process, nonsense-mediated decay [GO:0000184];protein localization to nucleus [GO:0034504];protein targeting [GO:0006605];ribosomal large subunit assembly [GO:0000027];ribosomal large subunit biogenesis [GO:0042273];rRNA processing [GO:0006364];SRP-dependent cotranslational protein targeting to membrane [GO:0006614];translation [GO:0006412];translational initiat…	poly(A) RNA binding [GO:0044822];RNA binding [GO:0003723];rRNA binding [GO:0019843];structural constituent of ribosome [GO:0003735];structural constituent of ribosome [GO:0003735];structural constituent of ribosome [GO:0003735]	cytoplasm [GO:0005737];cytosol [GO:0005829];cytosolic large ribosomal subunit [GO:0022625];extracellular exosome [GO:0070062];extracellular matrix [GO:0031012];membrane [GO:0016020];nucleolus [GO:0005730];nucleoplasm [GO:0005654];ribosome [GO:0005840];ribosome [GO:0005840]	GO:0000027;GO:0000184;GO:0003723;GO:0003735;GO:0005654;GO:0005730;GO:0005737;GO:0005829;GO:0006364;GO:0006412;GO:0006413;GO:0006605;GO:0006614;GO:0016020;GO:0019083;GO:0019843;GO:0022625;GO:0031012;GO:0034504;GO:0042273;GO:0044822;GO:0070062;GO:0003735;GO:0005840;GO:0006412;GO:0003735;GO:0005840;GO:0006412
22.2559	21.1562	20.5323	24.2383	23.815	24.4851	19.7749	18.7992	19.6448	19.6663	18.9176	21.4581	+	2.17484	3.36582	2.86465		NaN	NaN	0.607697	Q9Y3P8;A0A087WXW3	Q9Y3P8;A0A087WXW3	Signaling threshold-regulating transmembrane adapter 1	SIT1				adaptive immune response [GO:0002250];regulation of T cell activation [GO:0050863];signal transduction [GO:0007165];T cell homeostasis [GO:0043029];regulation of T cell activation [GO:0050863];signal transduction [GO:0007165];T cell homeostasis [GO:0043029]	kinase binding [GO:0019900];SH2 domain binding [GO:0042169]	extracellular exosome [GO:0070062];integral component of plasma membrane [GO:0005887];plasma membrane [GO:0005886];integral component of membrane [GO:0016021]	GO:0002250;GO:0005886;GO:0005887;GO:0007165;GO:0019900;GO:0042169;GO:0043029;GO:0050863;GO:0070062;GO:0007165;GO:0016021;GO:0043029;GO:0050863
20.6885	21.4591	21.0288	23.6879	23.7134	23.9745	20.2262	22.0848	19.599	19.4056	19.6872	19.492	+	3.87422	3.09363	2.73313		NaN	NaN	-1.10842	K7EQ02;K7EQ55;K7EK33;Q96EP5	K7EQ02;K7EQ55;K7EK33;Q96EP5	DAZ-associated protein 1	DAZAP1				cell differentiation [GO:0030154];cell proliferation [GO:0008283];maternal placenta development [GO:0001893];positive regulation of mRNA splicing, via spliceosome [GO:0048026];spermatogenesis [GO:0007283]	nucleotide binding [GO:0000166];poly(A) RNA binding [GO:0044822];RNA binding [GO:0003723];RNA stem-loop binding [GO:0035613];nucleic acid binding [GO:0003676];nucleotide binding [GO:0000166];nucleic acid binding [GO:0003676];nucleotide binding [GO:0000166];nucleic acid binding [GO:0003676];nucleotide binding [GO:0000166]	cytoplasm [GO:0005737];nucleoplasm [GO:0005654]	GO:0000166;GO:0001893;GO:0003723;GO:0005654;GO:0005737;GO:0007283;GO:0008283;GO:0030154;GO:0035613;GO:0044822;GO:0048026;GO:0000166;GO:0003676;GO:0000166;GO:0003676;GO:0000166;GO:0003676
22.759	22.8678	23.0401	25.8992	25.4674	25.2529	23.3301	23.2687	23.3019	23.1374	23.4301	23.3229	+	3.6696	2.65087	2.65087		0.0129951	-0.00343323	-0.00343323	O94906	O94906	Pre-mRNA-processing factor 6	PRPF6				mRNA splicing, via spliceosome [GO:0000398];positive regulation of transcription from RNA polymerase II promoter [GO:0045944];RNA localization [GO:0006403];RNA splicing [GO:0008380];RNA splicing, via transesterification reactions [GO:0000375];spliceosomal complex assembly [GO:0000245];spliceosomal tri-snRNP complex assembly [GO:0000244]	androgen receptor binding [GO:0050681];poly(A) RNA binding [GO:0044822];ribonucleoprotein complex binding [GO:0043021];RNA binding [GO:0003723];transcription coactivator activity [GO:0003713]	catalytic step 2 spliceosome [GO:0071013];membrane [GO:0016020];nuclear speck [GO:0016607];nucleoplasm [GO:0005654];nucleus [GO:0005634];spliceosomal complex [GO:0005681];U4/U6 x U5 tri-snRNP complex [GO:0046540];U5 snRNP [GO:0005682]	GO:0000244;GO:0000245;GO:0000375;GO:0000398;GO:0003713;GO:0003723;GO:0005634;GO:0005654;GO:0005681;GO:0005682;GO:0006403;GO:0008380;GO:0016020;GO:0016607;GO:0043021;GO:0044822;GO:0045944;GO:0046540;GO:0050681;GO:0071013
24.447	24.3291	24.8407	27.166	27.0829	27.2345	24.7389	24.6449	24.6287	25.4914	25.2704	25.3149	+	4.08255	2.6222	2.6222		3.0897	0.688066	0.688066	O00116;A0A1B0GWA2;B8ZZ81	O00116;A0A1B0GWA2	Alkyldihydroxyacetonephosphate synthase, peroxisomal	AGPS	CATALYTIC ACTIVITY: 1-acyl-glycerone 3-phosphate + a long-chain alcohol = an alkyl-glycerone 3-phosphate + a long-chain acid anion.;CATALYTIC ACTIVITY: 1-acyl-glycerone 3-phosphate + a long-chain alcohol = an alkyl-glycerone 3-phosphate + a long-chain acid anion. {ECO:0000256|RuleBase:RU363113}.;CATALYTIC ACTIVITY: 1-acyl-glycerone 3-phosphate + a long-chain alcohol = an alkyl-glycerone 3-phospha…	2.5.1.26;2.5.1.26;2.5.1.26	ACT_SITE 578 578 Proton donor/acceptor. {ECO:0000250}.	ether lipid biosynthetic process [GO:0008611];lipid biosynthetic process [GO:0008610];lipid biosynthetic process [GO:0008610];lipid biosynthetic process [GO:0008610]	alkylglycerone-phosphate synthase activity [GO:0008609];FAD binding [GO:0071949];oxidoreductase activity, acting on CH-OH group of donors [GO:0016614];alkylglycerone-phosphate synthase activity [GO:0008609];flavin adenine dinucleotide binding [GO:0050660];alkylglycerone-phosphate synthase activity [GO:0008609];flavin adenine dinucleotide binding [GO:0050660];oxidoreductase activity, acting on CH-…	intracellular membrane-bounded organelle [GO:0043231];membrane [GO:0016020];mitochondrion [GO:0005739];nucleolus [GO:0005730];peroxisomal matrix [GO:0005782];peroxisomal membrane [GO:0005778];peroxisome [GO:0005777]	GO:0005730;GO:0005739;GO:0005777;GO:0005778;GO:0005782;GO:0008609;GO:0008610;GO:0008611;GO:0016020;GO:0016614;GO:0043231;GO:0071949;GO:0008609;GO:0008610;GO:0050660;GO:0008609;GO:0008610;GO:0016614;GO:0050660
20.8021	20.9415	21.5951	23.9316	23.3619	23.6913	19.4753	20.1595	19.3331	20.3428	19.4701	19.8869	+	2.45424	2.3003	2.54871		NaN	NaN	0.243968	Q96K76	Q96K76	Ubiquitin carboxyl-terminal hydrolase 47	USP47	CATALYTIC ACTIVITY: Thiol-dependent hydrolysis of ester, thioester, amide, peptide and isopeptide bonds formed by the C-terminal Gly of ubiquitin (a 76-residue protein attached to proteins as an intracellular targeting signal). {ECO:0000269|PubMed:21362556}.	3.4.19.12	ACT_SITE 197 197 Nucleophile. {ECO:0000255|PROSITE-ProRule:PRU10092, ECO:0000255|PROSITE-ProRule:PRU10093}.;ACT_SITE 503 503 Proton acceptor. {ECO:0000255|PROSITE-ProRule:PRU10092, ECO:0000255|PROSITE-ProRule:PRU10093}.	base-excision repair [GO:0006284];cellular response to DNA damage stimulus [GO:0006974];cellular response to UV [GO:0034644];monoubiquitinated protein deubiquitination [GO:0035520];negative regulation of apoptotic process [GO:0043066];negative regulation of cysteine-type endopeptidase activity involved in apoptotic process [GO:0043154];negative regulation of G2/M transition of mitotic cell cycle …	thiol-dependent ubiquitin-specific protease activity [GO:0004843];WD40-repeat domain binding [GO:0071987]	cytoplasm [GO:0005737];nucleus [GO:0005634];SCF ubiquitin ligase complex [GO:0019005]	GO:0004843;GO:0005634;GO:0005737;GO:0006284;GO:0006511;GO:0006974;GO:0010972;GO:0019005;GO:0030307;GO:0034644;GO:0035520;GO:0042493;GO:0043066;GO:0043154;GO:0045892;GO:0071987;GO:1902230
22.9504	22.6072	22.2578	24.9541	25.5086	24.7345	24.4442	24.0226	24.42	24.2742	24.4122	24.5153	+	2.89202	2.4606	2.4606		0.2744	0.104967	0.104967	E7EX73;E9PGM1;E7EUU4;Q04637;C9JF13;C9J6B6;C9K073;C9J2Z7;H7C0V6;H7C044;A0A0A0MSA7;A0A0U1RQK7;O43432;F8WCF2;REV__F5H7J8;C9JHW9;REV__Q8NEG2;REV__C9JQZ6;REV__J3KQX6	E7EX73;E9PGM1;E7EUU4;Q04637;C9JF13	Eukaryotic translation initiation factor 4 gamma 1	EIF4G1				behavioral fear response [GO:0001662];cap-dependent translational initiation [GO:0002191];cellular macromolecule biosynthetic process [GO:0034645];developmental process [GO:0032502];mitochondrion organization [GO:0007005];negative regulation of autophagy [GO:0010507];negative regulation of neuron death [GO:1901215];negative regulation of peptidyl-threonine phosphorylation [GO:0010801];nuclear-tra…	ATP binding [GO:0005524];cadherin binding involved in cell-cell adhesion [GO:0098641];eukaryotic initiation factor 4E binding [GO:0008190];mRNA binding [GO:0003729];poly(A) RNA binding [GO:0044822];protein complex scaffold [GO:0032947];RNA binding [GO:0003723];translation factor activity, RNA binding [GO:0008135];translation initiation factor activity [GO:0003743];translation initiation factor bi…	cell-cell adherens junction [GO:0005913];cytoplasm [GO:0005737];cytosol [GO:0005829];eukaryotic translation initiation factor 4F complex [GO:0016281];membrane [GO:0016020];nucleus [GO:0005634];polysome [GO:0005844];cytosol [GO:0005829];eukaryotic translation initiation factor 4F complex [GO:0016281];cytoplasm [GO:0005737];cytoplasm [GO:0005737]	GO:0000184;GO:0000289;GO:0001662;GO:0002191;GO:0003723;GO:0003729;GO:0003743;GO:0005524;GO:0005634;GO:0005737;GO:0005829;GO:0005844;GO:0005913;GO:0006412;GO:0006413;GO:0006446;GO:0007005;GO:0008135;GO:0008190;GO:0008284;GO:0010507;GO:0010801;GO:0016020;GO:0016032;GO:0016281;GO:0030307;GO:0031369;GO:0032270;GO:0032502;GO:0032947;GO:0033138;GO:0034645;GO:0043488;GO:0044822;GO:0045666;GO:0060964;GO:…
24.6472	24.9696	25.2258	27.2304	27.3326	27.6287	24.336	24.5966	24.1016	24.3156	24.1071	24.3262	+	3.54607	2.4497	2.4497		0.233792	-0.0951004	-0.0951004	C9JIF9;P13798;H7C393;H7C1U0;C9JLK2;F8WEH5;H0YFE5	C9JIF9;P13798;H7C393;H7C1U0	Acylamino-acid-releasing enzyme	APEH	CATALYTIC ACTIVITY: Cleavage of an N-acetyl or N-formyl amino acid from the N-terminus of a polypeptide.	3.4.19.1	ACT_SITE 587 587 Charge relay system. {ECO:0000255|PROSITE-ProRule:PRU10084, ECO:0000269|PubMed:1740429}.;ACT_SITE 675 675 Charge relay system. {ECO:0000255|PROSITE-ProRule:PRU10084}.;ACT_SITE 707 707 Charge relay system. {ECO:0000255|PROSITE-ProRule:PRU10084, ECO:0000269|PubMed:1740429}.	beta-amyloid metabolic process [GO:0050435];proteolysis [GO:0006508];translational termination [GO:0006415]	identical protein binding [GO:0042802];omega peptidase activity [GO:0008242];poly(A) RNA binding [GO:0044822];serine-type endopeptidase activity [GO:0004252];serine-type endopeptidase activity [GO:0004252]	cytoplasm [GO:0005737];cytosol [GO:0005829];extracellular exosome [GO:0070062];nuclear membrane [GO:0031965];cytoplasm [GO:0005737];nuclear membrane [GO:0031965];cytoplasm [GO:0005737];nuclear membrane [GO:0031965]	GO:0004252;GO:0005737;GO:0005829;GO:0006415;GO:0006508;GO:0008242;GO:0031965;GO:0042802;GO:0044822;GO:0050435;GO:0070062;GO:0004252;GO:0005737;GO:0031965;GO:0005737;GO:0031965
21.5118	20.3335	19.9245	23.0543	23.0988	22.8373	19.685	20.3962	18.7046	20.2717	20.7329	19.726	+	2.28239	2.03784	2.40687		NaN	NaN	0.648279	A0A0A0MSJ0;Q86XP3	A0A0A0MSJ0;Q86XP3	ATP-dependent RNA helicase DDX42	DDX42	CATALYTIC ACTIVITY: ATP + H(2)O = ADP + phosphate.	3.6.4.13		protein localization [GO:0008104];RNA secondary structure unwinding [GO:0010501]	ATP binding [GO:0005524];ATP-dependent RNA helicase activity [GO:0004004];poly(A) RNA binding [GO:0044822];ATP binding [GO:0005524];helicase activity [GO:0004386];nucleic acid binding [GO:0003676]	Cajal body [GO:0015030];cytoplasm [GO:0005737];membrane [GO:0016020];nuclear speck [GO:0016607];nucleoplasm [GO:0005654];nucleus [GO:0005634]	GO:0004004;GO:0005524;GO:0005634;GO:0005654;GO:0005737;GO:0008104;GO:0010501;GO:0015030;GO:0016020;GO:0016607;GO:0044822;GO:0003676;GO:0004386;GO:0005524
21.024	21.3188	20.9352	23.5204	23.0786	23.7931	19.211	20.1725	18.9489	19.9573	19.1558	20.1973	+	3.49879	2.61711	2.37139		NaN	NaN	0.326003	E7EVW7;P14317	E7EVW7;P14317	Hematopoietic lineage cell-specific protein	HCLS1				actin filament polymerization [GO:0030041];cellular response to cytokine stimulus [GO:0071345];erythrocyte differentiation [GO:0030218];intracellular signal transduction [GO:0035556];negative regulation of leukocyte apoptotic process [GO:2000107];negative regulation of transcription from RNA polymerase II promoter [GO:0000122];positive regulation of actin cytoskeleton reorganization [GO:2000251];…	protein kinase binding [GO:0019901];RNA polymerase II transcription factor binding [GO:0001085]	cytoplasm [GO:0005737];membrane [GO:0016020];mitochondrion [GO:0005739];nucleus [GO:0005634];transcription factor complex [GO:0005667]	GO:0000122;GO:0001085;GO:0005634;GO:0005667;GO:0005737;GO:0005739;GO:0006355;GO:0008284;GO:0009725;GO:0014068;GO:0016020;GO:0019901;GO:0030041;GO:0030218;GO:0030833;GO:0030854;GO:0033138;GO:0035556;GO:0042531;GO:0042993;GO:0045651;GO:0045944;GO:0050731;GO:0051897;GO:0071345;GO:2000107;GO:2000251;GO:0030041
21.2943	21.0316	21.1902	23.7901	23.131	23.2689	20.014	20.7476	18.8862	19.7622	20.133	19.5397	+	2.95106	2.64793	2.22465		NaN	NaN	-0.0709947	Q8IY17;M0QXH7;Q6ZV29	Q8IY17	Neuropathy target esterase	PNPLA6	CATALYTIC ACTIVITY: 2-lysophosphatidylcholine + H(2)O = glycerophosphocholine + a carboxylate.	3.1.1.5;3.1.1.-	ACT_SITE 1005 1005 Nucleophile. {ECO:0000255|PROSITE-ProRule:PRU01161}.;ACT_SITE 1125 1125 Proton acceptor. {ECO:0000255|PROSITE-ProRule:PRU01161}.;ACT_SITE 961 961 Nucleophile. {ECO:0000255|PROSITE-ProRule:PRU01161}.;ACT_SITE 1081 1081 Proton acceptor. {ECO:0000255|PROSITE-ProRule:PRU01161}.	angiogenesis [GO:0001525];animal organ morphogenesis [GO:0009887];developmental process [GO:0032502];glycerophospholipid catabolic process [GO:0046475];phosphatidylcholine metabolic process [GO:0046470];developmental process [GO:0032502];lipid catabolic process [GO:0016042]	lysophospholipase activity [GO:0004622];lysophospholipase activity [GO:0004622]	endoplasmic reticulum [GO:0005783];endoplasmic reticulum membrane [GO:0005789];integral component of membrane [GO:0016021];membrane [GO:0016020];endoplasmic reticulum [GO:0005783];integral component of membrane [GO:0016021];lysosomal membrane [GO:0005765];mitochondrial membrane [GO:0031966];nuclear membrane [GO:0031965]	GO:0001525;GO:0004622;GO:0005783;GO:0005789;GO:0009887;GO:0016020;GO:0016021;GO:0032502;GO:0046470;GO:0046475;GO:0004622;GO:0005765;GO:0005783;GO:0016021;GO:0016042;GO:0031965;GO:0031966;GO:0032502
20.9417	21.1533	20.3252	23.2486	22.6083	23.1763	19.5993	19.2467	18.892	19.9685	19.8949	19.2914	+	2.15545	1.87461	2.20432		NaN	NaN	0.472293	Q99487;Q5SY01;Q5SY00	Q99487	Platelet-activating factor acetylhydrolase 2, cytoplasmic	PAFAH2	CATALYTIC ACTIVITY: 1-alkyl-2-acetyl-sn-glycero-3-phosphocholine + H(2)O = 1-alkyl-sn-glycero-3-phosphocholine + acetate.	3.1.1.47	ACT_SITE 236 236 Nucleophile. {ECO:0000250}.;ACT_SITE 259 259 Charge relay system. {ECO:0000255|PROSITE-ProRule:PRU10037}.;ACT_SITE 314 314 Charge relay system. {ECO:0000255|PROSITE-ProRule:PRU10037}.	lipid catabolic process [GO:0016042];lipid metabolic process [GO:0006629];negative regulation of apoptotic process [GO:0043066];lipid catabolic process [GO:0016042];lipid catabolic process [GO:0016042]	1-alkyl-2-acetylglycerophosphocholine esterase activity [GO:0003847];phospholipid binding [GO:0005543];1-alkyl-2-acetylglycerophosphocholine esterase activity [GO:0003847];1-alkyl-2-acetylglycerophosphocholine esterase activity [GO:0003847]	cytoplasm [GO:0005737]	GO:0003847;GO:0005543;GO:0005737;GO:0006629;GO:0016042;GO:0043066;GO:0003847;GO:0016042;GO:0003847;GO:0016042
20.7584	21.3638	20.9778	23.5216	22.9084	22.9585	19.7132	21.5509	18.9488	21.0706	20.3791	19.4284	+	2.69962	2.04462	2.09617		NaN	NaN	0.22175	Q9BV23;C9J010;C9JNE7	Q9BV23	Monoacylglycerol lipase ABHD6	ABHD6	CATALYTIC ACTIVITY: Hydrolyzes glycerol monoesters of long-chain fatty acids. {ECO:0000269|PubMed:22969151}.	3.1.1.23	ACT_SITE 148 148 Nucleophile. {ECO:0000250|UniProtKB:Q99685, ECO:0000305|PubMed:22969151}.;ACT_SITE 278 278 Charge relay system. {ECO:0000250|UniProtKB:Q99685}.;ACT_SITE 306 306 Charge relay system. {ECO:0000250|UniProtKB:Q99685}.	acylglycerol catabolic process [GO:0046464];long term synaptic depression [GO:0060292];negative regulation of cell migration [GO:0030336];phospholipid catabolic process [GO:0009395];positive regulation of lipid biosynthetic process [GO:0046889];regulation of endocannabinoid signaling pathway [GO:2000124]	acylglycerol lipase activity [GO:0047372];phospholipase activity [GO:0004620]	AMPA glutamate receptor complex [GO:0032281];extracellular exosome [GO:0070062];integral component of membrane [GO:0016021];mitochondrion [GO:0005739];plasma membrane [GO:0005886];integral component of membrane [GO:0016021];integral component of membrane [GO:0016021]	GO:0004620;GO:0005739;GO:0005886;GO:0009395;GO:0016021;GO:0030336;GO:0032281;GO:0046464;GO:0046889;GO:0047372;GO:0060292;GO:0070062;GO:2000124;GO:0016021;GO:0016021
20.9006	22.0395	21.4038	23.321	23.3604	23.8013	19.7586	20.0211	20.5125	19.9303	20.1553	20.3622	+	1.90531	2.12373	2.04626		NaN	NaN	0.0518672	F8W726;Q14157;Q5VU79;Q5VU78;Q5VU77;Q5VU81;Q5VU80;H0Y5H6;H7C2T8	F8W726;Q14157	Ubiquitin-associated protein 2-like	UBAP2L				binding of sperm to zona pellucida [GO:0007339];hematopoietic stem cell homeostasis [GO:0061484];positive regulation of gene expression [GO:0010628]	poly(A) RNA binding [GO:0044822]	cytoplasm [GO:0005737];PcG protein complex [GO:0031519]	GO:0005737;GO:0007339;GO:0010628;GO:0031519;GO:0044822;GO:0061484
21.1964	20.7497	20.855	22.8322	22.8783	23.1207	22.1494	22.4906	22.2857	22.2728	22.4424	22.3671	+	2.60606	2.00999	2.01003		0.179384	0.0521997	0.0521997	H3BVG0;Q8N1F7;H3BRI8;H3BM93;H3BMX0;H3BNN5;H3BV11;H3BP95;H3BPA9;H3BVE2;H3BNG7;H3BRD9	H3BVG0;Q8N1F7	Nuclear pore complex protein Nup93	NUP93				gene silencing by RNA [GO:0031047];glomerular visceral epithelial cell development [GO:0072015];glomerular visceral epithelial cell migration [GO:0090521];intracellular transport of virus [GO:0075733];mitotic nuclear envelope disassembly [GO:0007077];mRNA export from nucleus [GO:0006406];negative regulation of hydrogen peroxide-induced cell death [GO:1903206];nuclear envelope organization [GO:000…	structural constituent of nuclear pore [GO:0017056]	membrane [GO:0016020];nuclear envelope [GO:0005635];nuclear membrane [GO:0031965];nuclear periphery [GO:0034399];nuclear pore [GO:0005643];nuclear pore [GO:0005643];nuclear pore [GO:0005643];nuclear pore [GO:0005643];nuclear pore [GO:0005643];nuclear pore [GO:0005643];nuclear pore [GO:0005643];nuclear pore [GO:0005643];nuclear pore [GO:0005643];nuclear pore [GO:0005643];nuclear pore [GO:0005643]	GO:0005635;GO:0005643;GO:0006406;GO:0006409;GO:0006606;GO:0006998;GO:0007077;GO:0010827;GO:0016020;GO:0016032;GO:0016925;GO:0016973;GO:0017056;GO:0019083;GO:0031047;GO:0031965;GO:0034399;GO:0051292;GO:0060391;GO:0060395;GO:0072001;GO:0072015;GO:0075733;GO:0090521;GO:1900034;GO:1903206;GO:0005643;GO:0006810;GO:0005643;GO:0006810;GO:0005643;GO:0006810;GO:0005643;GO:0006810;GO:0005643;GO:0006810;GO:…
22.9877	22.3716	22.9041	20.6587	21.1078	20.5296	19.9786	18.9361	19.3989	21.3995	22.0688	22.2196	+	2.63782	-1.54551	-1.98908	+	2.11268	2.1376	2.45811	J3KRE2;J3KTF8;J3QQX2;P52565;J3KS60;J3KRY1	J3KRE2;J3KTF8;J3QQX2;P52565;J3KS60;J3KRY1	Rho GDP-dissociation inhibitor 1	ARHGDIA				movement of cell or subcellular component [GO:0006928];negative regulation of apoptotic process [GO:0043066];negative regulation of axonogenesis [GO:0050771];negative regulation of cell adhesion [GO:0007162];positive regulation of axonogenesis [GO:0050772];regulation of actin cytoskeleton reorganization [GO:2000249];regulation of Rho protein signal transduction [GO:0035023];regulation of small GT…	GTPase activator activity [GO:0005096];Rho GDP-dissociation inhibitor activity [GO:0005094];Rho GDP-dissociation inhibitor activity [GO:0005094];fatty acid binding [GO:0005504];Rho GDP-dissociation inhibitor activity [GO:0005094];Rho GDP-dissociation inhibitor activity [GO:0005094];Rho GDP-dissociation inhibitor activity [GO:0005094];Rho GDP-dissociation inhibitor activity [GO:0005094]	cytoskeleton [GO:0005856];cytosol [GO:0005829];extracellular exosome [GO:0070062];cytoplasm [GO:0005737];cytosol [GO:0005829];extracellular space [GO:0005615];immunological synapse [GO:0001772];nucleus [GO:0005634];cytoplasm [GO:0005737];cytoplasm [GO:0005737];cytoplasm [GO:0005737]	GO:0005094;GO:0005096;GO:0005829;GO:0005856;GO:0006928;GO:0007162;GO:0035023;GO:0043066;GO:0050771;GO:0050772;GO:0051056;GO:0070062;GO:0071526;GO:2000249;GO:0005094;GO:0005737;GO:0001772;GO:0005094;GO:0005504;GO:0005615;GO:0005634;GO:0005829;GO:0007266;GO:0008360;GO:0030336;GO:0032880;GO:0071260;GO:0071407;GO:0071461;GO:0071526;GO:0005094;GO:0005737;GO:0005094;GO:0005737;GO:0005094;GO:0005737
21.1784	20.2996	20.7368	22.1448	22.7882	22.5663	22.8559	22.5755	22.5473	19.8308	19.9441	19.7897	+	2.02474	1.84469	1.76151	+	3.88712	-2.73116	-2.80469	P07741;H3BQF1;H3BQZ9;H3BQB1;H3BSW3	P07741;H3BQF1;H3BQZ9;H3BQB1;H3BSW3	Adenine phosphoribosyltransferase	APRT	CATALYTIC ACTIVITY: AMP + diphosphate = adenine + 5-phospho-alpha-D-ribose 1-diphosphate.	2.4.2.7		adenine salvage [GO:0006168];AMP salvage [GO:0044209];cellular response to insulin stimulus [GO:0032869];grooming behavior [GO:0007625];lactation [GO:0007595];purine-containing compound salvage [GO:0043101];nucleoside metabolic process [GO:0009116];nucleoside metabolic process [GO:0009116];nucleoside metabolic process [GO:0009116]	adenine binding [GO:0002055];adenine phosphoribosyltransferase activity [GO:0003999];AMP binding [GO:0016208]	cytoplasm [GO:0005737];cytosol [GO:0005829];extracellular exosome [GO:0070062];nucleoplasm [GO:0005654];cytoplasm [GO:0005737];nucleoplasm [GO:0005654];cytoplasm [GO:0005737];nucleoplasm [GO:0005654]	GO:0002055;GO:0003999;GO:0005654;GO:0005737;GO:0005829;GO:0006168;GO:0007595;GO:0007625;GO:0016208;GO:0032869;GO:0043101;GO:0044209;GO:0070062;GO:0009116;GO:0005654;GO:0005737;GO:0009116;GO:0005654;GO:0005737;GO:0009116
23.3153	23.534	22.4722	21.7622	19.378	21.3866	23.0905	22.956	22.75	19.7722	19.0855	19.3223	+	2.01248	-1.94054	-2.26488	+	4.62569	-2.80504	-3.53884	Q8NC51	Q8NC51	Plasminogen activator inhibitor 1 RNA-binding protein	SERBP1				regulation of apoptotic process [GO:0042981];regulation of mRNA stability [GO:0043488]	cadherin binding involved in cell-cell adhesion [GO:0098641];mRNA 3'-UTR binding [GO:0003730];poly(A) RNA binding [GO:0044822]	cell-cell adherens junction [GO:0005913];cytoplasm [GO:0005737];extracellular exosome [GO:0070062];membrane [GO:0016020];nucleus [GO:0005634];perinuclear region of cytoplasm [GO:0048471];plasma membrane [GO:0005886]	GO:0003730;GO:0005634;GO:0005737;GO:0005886;GO:0005913;GO:0016020;GO:0042981;GO:0043488;GO:0044822;GO:0048471;GO:0070062;GO:0098641
24.2383	24.7542	24.3161	20.8759	20.1017	20.3501	20.2899	18.8267	20.4032	19.4156	19.3011	19.2353	+	3.58913	-2.7528	-3.99361		NaN	NaN	-0.522594	P14324;A0A087WTP2;A0A087X1D8;A0A087X090;A0A087WVN4	P14324;A0A087WTP2;A0A087X1D8;A0A087X090;A0A087WVN4	Farnesyl pyrophosphate synthase	FDPS	CATALYTIC ACTIVITY: Dimethylallyl diphosphate + isopentenyl diphosphate = diphosphate + geranyl diphosphate. {ECO:0000269|PubMed:16684881}.;CATALYTIC ACTIVITY: Geranyl diphosphate + isopentenyl diphosphate = diphosphate + (2E,6E)-farnesyl diphosphate. {ECO:0000269|PubMed:16684881}.	2.5.1.10;2.5.1.1		cholesterol biosynthetic process [GO:0006695];farnesyl diphosphate biosynthetic process [GO:0045337];geranyl diphosphate biosynthetic process [GO:0033384];viral process [GO:0016032];isoprenoid biosynthetic process [GO:0008299];isoprenoid biosynthetic process [GO:0008299];isoprenoid biosynthetic process [GO:0008299]	dimethylallyltranstransferase activity [GO:0004161];geranyltranstransferase activity [GO:0004337];metal ion binding [GO:0046872];poly(A) RNA binding [GO:0044822];transferase activity [GO:0016740];transferase activity [GO:0016740]	cytoplasm [GO:0005737];cytosol [GO:0005829];mitochondrion [GO:0005739];nucleoplasm [GO:0005654];integral component of membrane [GO:0016021]	GO:0004161;GO:0004337;GO:0005654;GO:0005737;GO:0005739;GO:0005829;GO:0006695;GO:0016032;GO:0033384;GO:0044822;GO:0045337;GO:0046872;GO:0008299;GO:0016021;GO:0016740;GO:0008299;GO:0016740;GO:0008299
24.1555	24.2384	24.4798	20.9457	20.619	20.1391	20.4131	23.5387	23.5109	22.1496	19.2877	21.1003	+	2.82986	-2.72195	-3.72329		NaN	NaN	-1.6417	G3V434;G3V2L5;G3V4A6;Q9Y2Z9	G3V434;G3V2L5;G3V4A6;Q9Y2Z9	Ubiquinone biosynthesis monooxygenase COQ6, mitochondrial	COQ6		1.14.13.-		secondary metabolite biosynthetic process [GO:0044550];ubiquinone biosynthetic process [GO:0006744]	FAD binding [GO:0071949];monooxygenase activity [GO:0004497];oxidoreductase activity, acting on paired donors, with incorporation or reduction of molecular oxygen, NAD(P)H as one donor, and incorporation of one atom of oxygen [GO:0016709];oxidoreductase activity [GO:0016491];oxidoreductase activity [GO:0016491]	cell projection [GO:0042995];Golgi apparatus [GO:0005794];mitochondrial inner membrane [GO:0005743];mitochondrion [GO:0005739]	GO:0004497;GO:0005739;GO:0005743;GO:0005794;GO:0006744;GO:0016709;GO:0042995;GO:0044550;GO:0071949;GO:0016491;GO:0016491
24.7418	24.8321	24.2429	20.4113	20.8463	21.4198	23.7449	23.8728	23.8054	23.7953	23.793	24.2325	+	2.32228	-3.55707	-3.71312		0.367788	0.132566	0.132566	Q32Q12;P22392	Q32Q12;P22392	Nucleoside diphosphate kinase;Nucleoside diphosphate kinase B	NME1-NME2;NME2	CATALYTIC ACTIVITY: ATP + nucleoside diphosphate = ADP + nucleoside triphosphate.;CATALYTIC ACTIVITY: ATP + protein L-histidine = ADP + protein N-phospho-L-histidine.;CATALYTIC ACTIVITY: ATP + nucleoside diphosphate = ADP + nucleoside triphosphate. {ECO:0000256|RuleBase:RU004013}.	2.7.4.6;2.7.13.3;2.7.4.6	ACT_SITE 118 118 Pros-phosphohistidine intermediate. {ECO:0000269|PubMed:1851158}.	cell adhesion [GO:0007155];cellular response to fatty acid [GO:0071398];cellular response to glucose stimulus [GO:0071333];cellular response to oxidative stress [GO:0034599];CTP biosynthetic process [GO:0006241];GTP biosynthetic process [GO:0006183];integrin-mediated signaling pathway [GO:0007229];negative regulation of apoptotic process [GO:0043066];negative regulation of myeloid leukocyte diffe…	ATP binding [GO:0005524];DNA binding [GO:0003677];drug binding [GO:0008144];fatty acid binding [GO:0005504];metal ion binding [GO:0046872];nucleoside diphosphate kinase activity [GO:0004550];protein histidine kinase activity [GO:0004673];protein serine/threonine kinase activity [GO:0004674];transcription factor activity, sequence-specific DNA binding [GO:0003700];ATP binding [GO:0005524];nucleosi…	cell periphery [GO:0071944];cytoplasm [GO:0005737];cytosol [GO:0005829];extracellular exosome [GO:0070062];intermediate filament [GO:0005882];lamellipodium [GO:0030027];mitochondrial membrane [GO:0031966];myelin sheath [GO:0043209];nucleus [GO:0005634];perinuclear region of cytoplasm [GO:0048471];ruffle [GO:0001726];cytoplasm [GO:0005737]	GO:0001726;GO:0002762;GO:0003677;GO:0003700;GO:0004550;GO:0004673;GO:0004674;GO:0005504;GO:0005524;GO:0005634;GO:0005737;GO:0005829;GO:0005882;GO:0006163;GO:0006183;GO:0006220;GO:0006228;GO:0006241;GO:0006351;GO:0006355;GO:0007155;GO:0007229;GO:0008144;GO:0009142;GO:0010976;GO:0015949;GO:0030027;GO:0030819;GO:0031966;GO:0034599;GO:0043066;GO:0043209;GO:0045618;GO:0045682;GO:0045944;GO:0046777;GO:…
23.6227	23.5767	23.6691	21.0086	19.9824	20.7522	25.3963	25.5504	25.3042	25.7636	25.0573	24.8492	+	2.8673	-2.74029	-3.04179		0.271347	-0.193633	-0.1936	Q9NU22;Q5T795;M0QXR3	Q9NU22	Midasin	MDN1				protein complex assembly [GO:0006461];ribosomal large subunit assembly [GO:0000027];rRNA processing [GO:0006364];ribosomal large subunit assembly [GO:0000027];ribosomal large subunit assembly [GO:0000027]	ATPase activity [GO:0016887];ATP binding [GO:0005524];unfolded protein binding [GO:0051082];ATPase activity [GO:0016887];ATP binding [GO:0005524];ATPase activity [GO:0016887]	cytoplasm [GO:0005737];intermediate filament cytoskeleton [GO:0045111];membrane [GO:0016020];nucleolus [GO:0005730];nucleus [GO:0005634];preribosome, large subunit precursor [GO:0030687];nucleus [GO:0005634];nucleus [GO:0005634]	GO:0000027;GO:0005524;GO:0005634;GO:0005730;GO:0005737;GO:0006364;GO:0006461;GO:0016020;GO:0016887;GO:0030687;GO:0045111;GO:0051082;GO:0000027;GO:0005524;GO:0005634;GO:0016887;GO:0000027;GO:0005634;GO:0016887
23.5982	24.2466	24.2334	21.9378	20.5597	20.7003	24.2502	24.361	24.0881	24.2875	23.547	23.8085	+	3.15798	-2.49313	-2.96016		0.694906	-0.3521	-0.3521	Q00796;H0YLA4;H0YKB3	Q00796;H0YLA4	Sorbitol dehydrogenase	SORD	CATALYTIC ACTIVITY: L-iditol + NAD(+) = L-sorbose + NADH.	1.1.1.14		flagellated sperm motility [GO:0030317];fructose biosynthetic process [GO:0046370];glucose metabolic process [GO:0006006];glucuronate catabolic process to xylulose 5-phosphate [GO:0019640];L-xylitol catabolic process [GO:0051160];L-xylitol metabolic process [GO:0051164];response to cadmium ion [GO:0046686];response to copper ion [GO:0046688];response to drug [GO:0042493];response to hormone [GO:0…	carbohydrate binding [GO:0030246];D-xylulose reductase activity [GO:0046526];identical protein binding [GO:0042802];L-iditol 2-dehydrogenase activity [GO:0003939];NAD binding [GO:0051287];zinc ion binding [GO:0008270];oxidoreductase activity [GO:0016491];zinc ion binding [GO:0008270];oxidoreductase activity [GO:0016491];zinc ion binding [GO:0008270]	cytosol [GO:0005829];extracellular exosome [GO:0070062];extracellular space [GO:0005615];membrane [GO:0016020];mitochondrial membrane [GO:0031966];motile cilium [GO:0031514]	GO:0003939;GO:0005615;GO:0005829;GO:0006006;GO:0006062;GO:0006970;GO:0008270;GO:0009725;GO:0016020;GO:0019640;GO:0030246;GO:0030317;GO:0031514;GO:0031667;GO:0031966;GO:0042493;GO:0042802;GO:0046370;GO:0046526;GO:0046686;GO:0046688;GO:0051160;GO:0051164;GO:0051287;GO:0070062;GO:0008270;GO:0016491;GO:0008270;GO:0016491
23.4289	24.655	24.3567	21.3357	20.5715	21.7621	24.2444	24.5303	24.2907	24.1979	23.7024	23.7594	+	1.87567	-2.90168	-2.92377		1.22396	-0.4686	-0.468567	J3QLE5;P63162;P14678;J3KRY3;S4R3P3	J3QLE5;P63162;P14678;J3KRY3;S4R3P3	Small nuclear ribonucleoprotein-associated protein N;Small nuclear ribonucleoprotein-associated proteins B and B	SNRPN;SNRPB				histone mRNA metabolic process [GO:0008334];mRNA splicing, via spliceosome [GO:0000398];nuclear import [GO:0051170];protein methylation [GO:0006479];RNA splicing [GO:0008380];spliceosomal snRNP assembly [GO:0000387];termination of RNA polymerase II transcription [GO:0006369];mRNA splicing, via spliceosome [GO:0000398];response to hormone [GO:0009725];RNA splicing [GO:0008380]	histone pre-mRNA DCP binding [GO:0071208];poly(A) RNA binding [GO:0044822];telomerase RNA binding [GO:0070034];U2 snRNA binding [GO:0030620];RNA binding [GO:0003723]	catalytic step 2 spliceosome [GO:0071013];cytosol [GO:0005829];extracellular exosome [GO:0070062];histone pre-mRNA 3'end processing complex [GO:0071204];methylosome [GO:0034709];nucleoplasm [GO:0005654];small nuclear ribonucleoprotein complex [GO:0030532];SMN-Sm protein complex [GO:0034719];spliceosomal complex [GO:0005681];U12-type spliceosomal complex [GO:0005689];U1 snRNP [GO:0005685];U2 snRNP…	GO:0000387;GO:0000398;GO:0005654;GO:0005681;GO:0005682;GO:0005683;GO:0005685;GO:0005686;GO:0005687;GO:0005689;GO:0005829;GO:0006369;GO:0006479;GO:0008334;GO:0008380;GO:0030532;GO:0030620;GO:0034709;GO:0034719;GO:0044822;GO:0046540;GO:0051170;GO:0070034;GO:0070062;GO:0071004;GO:0071013;GO:0071204;GO:0071208;GO:0000398;GO:0003723;GO:0005681;GO:0005682;GO:0005685;GO:0005686;GO:0005687;GO:0005737;GO:…
22.9011	23.8879	24.0846	20.6619	20.0841	21.5409	23.2908	23.5306	23.4463	24.1652	24.4131	23.6109	+	2.60502	-2.67902	-2.86224		1.21681	0.6405	0.6405	Q96AG4;I3L223	Q96AG4	Leucine-rich repeat-containing protein 59	LRRC59					cadherin binding involved in cell-cell adhesion [GO:0098641];poly(A) RNA binding [GO:0044822]	cell-cell adherens junction [GO:0005913];endoplasmic reticulum [GO:0005783];endoplasmic reticulum membrane [GO:0005789];integral component of membrane [GO:0016021];membrane [GO:0016020];mitochondrial nucleoid [GO:0042645];nuclear envelope [GO:0005635];organelle membrane [GO:0031090]	GO:0005635;GO:0005783;GO:0005789;GO:0005913;GO:0016020;GO:0016021;GO:0031090;GO:0042645;GO:0044822;GO:0098641
23.4515	23.2385	23.6683	21.1868	20.6633	20.8367	24.291	24.1997	24.1562	24.6798	24.3471	24.2842	+	3.26645	-2.48517	-2.55718		0.792489	0.2214	0.2214	P57088;D6RAA6;H0Y8N0;J3KN43;D6RBY2	P57088;D6RAA6	Transmembrane protein 33	TMEM33				cellular protein localization [GO:0034613];nuclear pore complex assembly [GO:0051292];positive regulation of IRE1-mediated unfolded protein response [GO:1903896];positive regulation of PERK-mediated unfolded protein response [GO:1903899];regulation of endoplasmic reticulum tubular network organization [GO:1903371];response to endoplasmic reticulum stress [GO:0034976]	structural constituent of nuclear pore [GO:0017056]	endoplasmic reticulum [GO:0005783];endoplasmic reticulum membrane [GO:0005789];extracellular exosome [GO:0070062];integral component of endoplasmic reticulum membrane [GO:0030176];melanosome [GO:0042470];nuclear envelope [GO:0005635];nuclear pore [GO:0005643];integral component of membrane [GO:0016021];integral component of membrane [GO:0016021];integral component of membrane [GO:0016021];integra…	GO:0005635;GO:0005643;GO:0005783;GO:0005789;GO:0017056;GO:0030176;GO:0034613;GO:0034976;GO:0042470;GO:0051292;GO:0070062;GO:1903371;GO:1903896;GO:1903899;GO:0016021;GO:0016021;GO:0016021;GO:0016021
23.222	23.7216	24.2716	22.5355	20.875	20.3391	23.1872	23.5791	23.6992	23.2464	23.2981	23.4289	+	2.23689	-2.27419	-2.48855		0.427803	-0.164033	-0.164033	P78417;Q5TA02;Q5TA01	P78417;Q5TA02;Q5TA01	Glutathione S-transferase omega-1	GSTO1	CATALYTIC ACTIVITY: RX + glutathione = HX + R-S-glutathione. {ECO:0000269|PubMed:10783391, ECO:0000269|PubMed:11511179, ECO:0000269|PubMed:17226937, ECO:0000269|PubMed:18028863, ECO:0000269|PubMed:21106529}.;CATALYTIC ACTIVITY: 2 glutathione + dehydroascorbate = glutathione disulfide + ascorbate. {ECO:0000269|PubMed:10783391, ECO:0000269|PubMed:11511179}.;CATALYTIC ACTIVITY: Methylarsonate + 2 gl…	2.5.1.18;1.8.5.1;1.20.4.2	ACT_SITE 32 32 Nucleophile. {ECO:0000269|PubMed:10783391}.	cellular response to arsenic-containing substance [GO:0071243];glutathione derivative biosynthetic process [GO:1901687];glutathione metabolic process [GO:0006749];L-ascorbic acid metabolic process [GO:0019852];methylation [GO:0032259];negative regulation of ryanodine-sensitive calcium-release channel activity [GO:0060315];positive regulation of ryanodine-sensitive calcium-release channel activity…	glutathione dehydrogenase (ascorbate) activity [GO:0045174];glutathione transferase activity [GO:0004364];methylarsonate reductase activity [GO:0050610];oxidoreductase activity [GO:0016491];glutathione transferase activity [GO:0004364]	cytoplasm [GO:0005737];cytosol [GO:0005829];extracellular exosome [GO:0070062];cytoplasm [GO:0005737]	GO:0004364;GO:0005737;GO:0005829;GO:0006749;GO:0010880;GO:0010881;GO:0014810;GO:0016491;GO:0019852;GO:0032259;GO:0042178;GO:0045174;GO:0050610;GO:0060315;GO:0060316;GO:0070062;GO:0071243;GO:1901687;GO:0004364;GO:0005737;GO:0008152
23.5174	23.141	23.2019	20.5859	21.0314	21.0577	22.6116	22.4937	22.6169	22.5557	22.6243	22.5899	+	3.18606	-1.91257	-2.39512		0.130348	0.0158997	0.0158997	G3V5Q1;G3V3M6;P27695;A0A0C4DGK8;G3V3C7;G3V5D9;G3V5M0;G3V359;H7C4A8;G3V3Y6	G3V5Q1;G3V3M6;P27695;A0A0C4DGK8;G3V3C7;G3V5D9;G3V5M0;G3V359	DNA-(apurinic or apyrimidinic site) lyase;DNA-(apurinic or apyrimidinic site) lyase, mitochondrial	APEX1	CATALYTIC ACTIVITY: The C-O-P bond 3' to the apurinic or apyrimidinic site in DNA is broken by a beta-elimination reaction, leaving a 3'-terminal unsaturated sugar and a product with a terminal 5'-phosphate. {ECO:0000255|PROSITE-ProRule:PRU00764, ECO:0000269|PubMed:11286553, ECO:0000269|PubMed:15380100, ECO:0000269|PubMed:19123919, ECO:0000269|PubMed:21762700, ECO:0000269|PubMed:9804799}.;CATALYT…	3.1.-.-;4.2.99.18;4.2.99.18;4.2.99.18;4.2.99.18;4.2.99.18;4.2.99.18;4.2.99.18;4.2.99.18	ACT_SITE 171 171;ACT_SITE 210 210 Proton donor/acceptor.	aging [GO:0007568];base-excision repair [GO:0006284];base-excision repair, base-free sugar-phosphate removal [GO:0006286];cell redox homeostasis [GO:0045454];cellular response to cAMP [GO:0071320];cellular response to hydrogen peroxide [GO:0070301];cellular response to peptide hormone stimulus [GO:0071375];DNA demethylation [GO:0080111];DNA recombination [GO:0006310];DNA repair [GO:0006281];negat…	3'-5' exonuclease activity [GO:0008408];chromatin DNA binding [GO:0031490];damaged DNA binding [GO:0003684];DNA-(apurinic or apyrimidinic site) lyase activity [GO:0003906];DNA binding [GO:0003677];double-stranded DNA 3'-5' exodeoxyribonuclease activity [GO:0008311];double-stranded DNA exodeoxyribonuclease activity [GO:0008309];double-stranded telomeric DNA binding [GO:0003691];endodeoxyribonuclea…	centrosome [GO:0005813];cytoplasm [GO:0005737];endoplasmic reticulum [GO:0005783];mitochondrion [GO:0005739];nuclear chromosome, telomeric region [GO:0000784];nuclear speck [GO:0016607];nucleolus [GO:0005730];nucleoplasm [GO:0005654];nucleus [GO:0005634];perinuclear region of cytoplasm [GO:0048471];ribosome [GO:0005840];transcription factor complex [GO:0005667];mitochondrion [GO:0005739];nucleus …	GO:0000723;GO:0000784;GO:0003677;GO:0003684;GO:0003691;GO:0003713;GO:0003714;GO:0003906;GO:0004519;GO:0004520;GO:0004523;GO:0004528;GO:0004844;GO:0005634;GO:0005654;GO:0005667;GO:0005730;GO:0005737;GO:0005739;GO:0005783;GO:0005813;GO:0005840;GO:0006281;GO:0006284;GO:0006286;GO:0006310;GO:0006351;GO:0006355;GO:0007568;GO:0008081;GO:0008309;GO:0008311;GO:0008408;GO:0014912;GO:0016491;GO:0016607;GO:…
22.8183	23.341	23.768	21.6984	21.1839	19.9327	23.7487	23.9097	23.6815	23.9118	23.8261	23.4565	+	2.79906	-2.42553	-2.37077		0.113327	-0.0485001	-0.0485001	P40938;A0A087X270	P40938	Replication factor C subunit 3	RFC3				DNA damage response, detection of DNA damage [GO:0042769];DNA replication [GO:0006260];DNA strand elongation involved in DNA replication [GO:0006271];DNA synthesis involved in DNA repair [GO:0000731];error-free translesion synthesis [GO:0070987];error-prone translesion synthesis [GO:0042276];nucleotide-excision repair, DNA gap filling [GO:0006297];nucleotide-excision repair, DNA incision [GO:0033…	DNA clamp loader activity [GO:0003689];DNA binding [GO:0003677]	Ctf18 RFC-like complex [GO:0031390];DNA replication factor C complex [GO:0005663];nucleoplasm [GO:0005654]	GO:0000722;GO:0000731;GO:0003689;GO:0005654;GO:0005663;GO:0006260;GO:0006271;GO:0006283;GO:0006296;GO:0006297;GO:0019985;GO:0031390;GO:0033683;GO:0042276;GO:0042769;GO:0046683;GO:0070987;GO:1900264;GO:1901796;GO:0003677;GO:0006260
24.7187	25.7529	26.4931	22.7769	23.6242	23.5414	27.212	26.6391	27.4809	26.58	26.3456	26.6512	+	1.80285	-2.34073	-2.34073		1.03755	-0.585066	-0.585066	A0A0A0MTR7;A0A0A0MTC1;Q63HN8;I3L3H9	A0A0A0MTR7;A0A0A0MTC1;Q63HN8	E3 ubiquitin-protein ligase RNF213	RNF213		3.6.4.-;6.3.2.-		angiogenesis [GO:0001525];negative regulation of non-canonical Wnt signaling pathway [GO:2000051];protein autoubiquitination [GO:0051865];protein homooligomerization [GO:0051260];protein polyubiquitination [GO:0000209];protein ubiquitination [GO:0016567];sprouting angiogenesis [GO:0002040];ubiquitin-dependent protein catabolic process [GO:0006511];angiogenesis [GO:0001525]	ATPase activity [GO:0016887];ligase activity [GO:0016874];ubiquitin-protein transferase activity [GO:0004842];zinc ion binding [GO:0008270];ATPase activity [GO:0016887];ubiquitin-protein transferase activity [GO:0004842];zinc ion binding [GO:0008270];ATPase activity [GO:0016887];ubiquitin-protein transferase activity [GO:0004842];zinc ion binding [GO:0008270]	cytoplasm [GO:0005737];cytosol [GO:0005829];membrane [GO:0016020];nucleolus [GO:0005730]	GO:0000209;GO:0001525;GO:0002040;GO:0004842;GO:0005730;GO:0005737;GO:0005829;GO:0006511;GO:0008270;GO:0016020;GO:0016567;GO:0016874;GO:0016887;GO:0051260;GO:0051865;GO:2000051;GO:0001525;GO:0004842;GO:0008270;GO:0016887;GO:0004842;GO:0008270;GO:0016887
23.7411	24.0735	23.6048	20.7082	21.2237	22.6615	23.472	23.7353	23.6599	23.6512	23.606	23.6303	+	1.63823	-2.41748	-2.27531		0.0286524	0.00676664	0.00676664	B0QY89;Q9Y262;B0QY90;C9JHP4;C9K0Q7;H7C3A0	B0QY89;Q9Y262;B0QY90	Eukaryotic translation initiation factor 3 subunit L	EIF3L				formation of translation preinitiation complex [GO:0001731];regulation of translational initiation [GO:0006446];translational initiation [GO:0006413];viral translational termination-reinitiation [GO:0075525];formation of translation preinitiation complex [GO:0001731];regulation of translational initiation [GO:0006446];formation of translation preinitiation complex [GO:0001731];regulation of trans…	poly(A) RNA binding [GO:0044822];translation initiation factor activity [GO:0003743];translation initiation factor activity [GO:0003743];translation initiation factor activity [GO:0003743];translation initiation factor activity [GO:0003743];translation initiation factor activity [GO:0003743];translation initiation factor activity [GO:0003743]	cytosol [GO:0005829];eukaryotic 43S preinitiation complex [GO:0016282];eukaryotic 48S preinitiation complex [GO:0033290];eukaryotic translation initiation factor 3 complex [GO:0005852];fibrillar center [GO:0001650];membrane [GO:0016020];nucleoplasm [GO:0005654];eukaryotic 43S preinitiation complex [GO:0016282];eukaryotic 48S preinitiation complex [GO:0033290];eukaryotic translation initiation fac…	GO:0001650;GO:0001731;GO:0003743;GO:0005654;GO:0005829;GO:0005852;GO:0006413;GO:0006446;GO:0016020;GO:0016282;GO:0033290;GO:0044822;GO:0075525;GO:0001731;GO:0003743;GO:0005852;GO:0006446;GO:0016282;GO:0033290;GO:0003743;GO:0005852;GO:0003743;GO:0005852;GO:0001731;GO:0003743;GO:0005852;GO:0006446;GO:0016282;GO:0033290;GO:0003743;GO:0005852
23.0511	23.2938	22.8307	20.8052	20.7044	20.8714	22.9309	23.0304	22.8993	19.6036	22.567	18.772	+	2.6955	-1.58953	-2.26484		1.1075	-2.41656	-2.63934	Q8N1G4	Q8N1G4	Leucine-rich repeat-containing protein 47	LRRC47					poly(A) RNA binding [GO:0044822]		GO:0044822
23.0147	23.4565	23.7598	20.5597	21.7866	21.1976	19.214	19.8787	19.3131	21.6451	20.8387	19.9829	+	2.44893	-2.28274	-2.22903		NaN	NaN	1.35358	P20618	P20618	Proteasome subunit beta type-1	PSMB1	CATALYTIC ACTIVITY: Cleavage of peptide bonds with very broad specificity.	3.4.25.1		anaphase-promoting complex-dependent catabolic process [GO:0031145];antigen processing and presentation of exogenous peptide antigen via MHC class I, TAP-dependent [GO:0002479];Fc-epsilon receptor signaling pathway [GO:0038095];MAPK cascade [GO:0000165];negative regulation of canonical Wnt signaling pathway [GO:0090090];negative regulation of ubiquitin-protein ligase activity involved in mitotic …	threonine-type endopeptidase activity [GO:0004298]	cytosol [GO:0005829];extracellular exosome [GO:0070062];nucleoplasm [GO:0005654];nucleus [GO:0005634];proteasome complex [GO:0000502];proteasome core complex [GO:0005839]	GO:0000165;GO:0000209;GO:0000502;GO:0002223;GO:0002479;GO:0004298;GO:0005634;GO:0005654;GO:0005829;GO:0005839;GO:0006521;GO:0016032;GO:0031145;GO:0033209;GO:0038061;GO:0038095;GO:0043161;GO:0043488;GO:0050852;GO:0051436;GO:0051437;GO:0060071;GO:0070062;GO:0090090;GO:0090263
22.5416	22.824	22.6269	20.87	19.7695	20.7681	22.6216	22.748	22.6134	22.5781	22.6042	22.4008	+	2.05858	-1.70608	-2.19499		0.796262	-0.133299	-0.133299	Q5SRE5;H7C4K7	Q5SRE5	Nucleoporin NUP188 homolog	NUP188				gene silencing by RNA [GO:0031047];glomerular visceral epithelial cell migration [GO:0090521];intracellular transport of virus [GO:0075733];mitotic nuclear envelope disassembly [GO:0007077];mRNA export from nucleus [GO:0006406];protein import into nucleus [GO:0006606];protein sumoylation [GO:0016925];regulation of cellular response to heat [GO:1900034];regulation of glucose transport [GO:0010827]…	structural constituent of nuclear pore [GO:0017056]	membrane [GO:0016020];nuclear envelope [GO:0005635];nuclear pore inner ring [GO:0044611]	GO:0005635;GO:0006405;GO:0006406;GO:0006409;GO:0006606;GO:0007077;GO:0010827;GO:0016020;GO:0016032;GO:0016925;GO:0017056;GO:0019083;GO:0031047;GO:0044611;GO:0075733;GO:0090521;GO:1900034
22.6637	23.5666	23.295	21.7928	21.1584	20.0236	24.2725	24.3876	24.0905	23.7932	23.5286	23.8519	+	2.15124	-1.78347	-2.18352		1.78852	-0.525666	-0.525633	Q9GZL7	Q9GZL7	Ribosome biogenesis protein WDR12	WDR12				cell proliferation [GO:0008283];maturation of 5.8S rRNA from tricistronic rRNA transcript (SSU-rRNA, 5.8S rRNA, LSU-rRNA) [GO:0000466];maturation of LSU-rRNA from tricistronic rRNA transcript (SSU-rRNA, 5.8S rRNA, LSU-rRNA) [GO:0000463];Notch signaling pathway [GO:0007219];ribosomal large subunit biogenesis [GO:0042273];rRNA processing [GO:0006364]	ribonucleoprotein complex binding [GO:0043021]	nucleolus [GO:0005730];nucleoplasm [GO:0005654];PeBoW complex [GO:0070545];preribosome, large subunit precursor [GO:0030687]	GO:0000463;GO:0000466;GO:0005654;GO:0005730;GO:0006364;GO:0007219;GO:0008283;GO:0030687;GO:0042273;GO:0043021;GO:0070545
23.1413	22.3295	23.4676	21.3055	21.4502	20.9815	23.221	23.2432	23.1948	23.1094	23.0586	23.4585	+	2.18015	-2.06527	-1.73373		0.0287937	-0.0108337	-0.0108337	F6T1Q0;Q6L8Q7	F6T1Q0;Q6L8Q7	2,5-phosphodiesterase 12	PDE12	CATALYTIC ACTIVITY: Exonucleolytic cleavage of poly(A) to 5'-AMP. {ECO:0000269|PubMed:21245038, ECO:0000269|PubMed:21666256, ECO:0000269|PubMed:22285541}.	3.1.4.-;3.1.13.4	ACT_SITE 351 351 {ECO:0000250}.;ACT_SITE 561 561 {ECO:0000250}.;ACT_SITE 599 599 {ECO:0000250}.	mRNA processing [GO:0006397]	metal ion binding [GO:0046872];poly(A)-specific ribonuclease activity [GO:0004535]	mitochondrial matrix [GO:0005759]	GO:0004535;GO:0005759;GO:0006397;GO:0046872
22.306	22.6052	22.3661	21.7071	20.295	21.2083	20.6646	19.883	19.2751	19.24	19.5548	20.1269	+	2.54192	-1.74552	-1.35564		NaN	NaN	-0.300335	E7EQG2;Q14240;J3KSN7;J3KT04;J3KS93;E7EMV8;J3QQP0;E9PBH4;F8WE11	E7EQG2;Q14240	Eukaryotic initiation factor 4A-II;Eukaryotic initiation factor 4A-II, N-terminally processed	EIF4A2	CATALYTIC ACTIVITY: ATP + H(2)O = ADP + phosphate.	3.6.4.13		negative regulation of RNA-directed RNA polymerase activity [GO:1900260];nuclear-transcribed mRNA poly(A) tail shortening [GO:0000289];regulation of translational initiation [GO:0006446];RNA secondary structure unwinding [GO:0010501];translational initiation [GO:0006413];viral process [GO:0016032];regulation of translational initiation [GO:0006446];regulation of translational initiation [GO:00064…	ATPase activity [GO:0016887];ATP binding [GO:0005524];ATP-dependent RNA helicase activity [GO:0004004];helicase activity [GO:0004386];poly(A) RNA binding [GO:0044822];translation initiation factor activity [GO:0003743];ATP-dependent RNA helicase activity [GO:0004004];ATP binding [GO:0005524];ATP-dependent RNA helicase activity [GO:0004004];nucleic acid binding [GO:0003676];ATP binding [GO:0005524…	cytosol [GO:0005829];eukaryotic translation initiation factor 4F complex [GO:0016281];perinuclear region of cytoplasm [GO:0048471]	GO:0000289;GO:0003743;GO:0004004;GO:0004386;GO:0005524;GO:0005829;GO:0006413;GO:0006446;GO:0010501;GO:0016032;GO:0016281;GO:0016887;GO:0044822;GO:0048471;GO:1900260;GO:0004004;GO:0006446;GO:0003676;GO:0004004;GO:0005524;GO:0006446;GO:0003676;GO:0004004;GO:0005524;GO:0006446;GO:0004004;GO:0006446;GO:0003676;GO:0004004;GO:0005524;GO:0006446;GO:0004004;GO:0006446;GO:0004004;GO:0006446;GO:0003676;GO:…
21.2428	21.3433	21.6549	22.7929	22.2777	22.9156	19.714	19.2495	18.9966	19.7045	19.525	20.0672	+	2.07674	1.80602	1.24836		NaN	NaN	0.44551	E9PI08;Q9Y256;E9PKA7;E9PPV9	E9PI08;Q9Y256;E9PKA7	CAAX prenyl protease 2	RCE1		3.4.22.-	ACT_SITE 175 175 Proton donor/acceptor. {ECO:0000250|UniProtKB:Q6LZY8}.;ACT_SITE 208 208 Proton donor/acceptor. {ECO:0000250|UniProtKB:Q6LZY8}.	CAAX-box protein processing [GO:0071586];proteolysis [GO:0006508]	cysteine-type endopeptidase activity [GO:0004197];endopeptidase activity [GO:0004175];metalloendopeptidase activity [GO:0004222]	endoplasmic reticulum membrane [GO:0005789];integral component of endoplasmic reticulum membrane [GO:0030176];integral component of plasma membrane [GO:0005887];membrane [GO:0016020];integral component of membrane [GO:0016021];integral component of membrane [GO:0016021]	GO:0004175;GO:0004197;GO:0004222;GO:0005789;GO:0005887;GO:0006508;GO:0016020;GO:0030176;GO:0071586;GO:0016021;GO:0016021
20.8335	21.7507	21.7968	23.4563	22.8011	22.7967	19.9305	19.0721	19.7622	19.0273	20.3274	18.9161	+	1.99413	2.0158	1.55772		NaN	NaN	-0.164667	Q8N2K0;I3L380;I3L294;Q5T712;I3L1V0	Q8N2K0	Monoacylglycerol lipase ABHD12	ABHD12	CATALYTIC ACTIVITY: Hydrolyzes glycerol monoesters of long-chain fatty acids. {ECO:0000269|PubMed:22969151}.	3.1.1.23	ACT_SITE 246 246 Nucleophile. {ECO:0000305|PubMed:22969151}.;ACT_SITE 333 333 Charge relay system. {ECO:0000305|PubMed:22969151}.;ACT_SITE 372 372 Charge relay system. {ECO:0000305|PubMed:22969151}.	acylglycerol catabolic process [GO:0046464];adult walking behavior [GO:0007628];glycerophospholipid catabolic process [GO:0046475];monoacylglycerol catabolic process [GO:0052651];phosphatidylserine catabolic process [GO:0006660];response to auditory stimulus [GO:0010996]	acylglycerol lipase activity [GO:0047372];lysophospholipase activity [GO:0004622];acylglycerol lipase activity [GO:0047372];acylglycerol lipase activity [GO:0047372];acylglycerol lipase activity [GO:0047372];acylglycerol lipase activity [GO:0047372]	AMPA glutamate receptor complex [GO:0032281];integral component of membrane [GO:0016021];plasma membrane [GO:0005886];integral component of membrane [GO:0016021];integral component of membrane [GO:0016021]	GO:0004622;GO:0005886;GO:0006660;GO:0007628;GO:0010996;GO:0016021;GO:0032281;GO:0046464;GO:0046475;GO:0047372;GO:0052651;GO:0047372;GO:0047372;GO:0016021;GO:0047372;GO:0016021;GO:0047372
27.819	27.187	27.8544	29.8437	29.3342	29.1636	27.8073	27.6812	27.8768	27.8765	27.4611	27.5015	+	2.44589	1.82703	1.82703		0.536897	-0.175367	-0.175401	P49327;A0A0U1RQF0;A0A0U1RRG3;A0A1B0GTR5;J3KTF0	P49327;A0A0U1RQF0	Fatty acid synthase;[Acyl-carrier-protein] S-acetyltransferase;[Acyl-carrier-protein] S-malonyltransferase;3-oxoacyl-[acyl-carrier-protein] synthase;3-oxoacyl-[acyl-carrier-protein] reductase;3-hydroxyacyl-[acyl-carrier-protein] dehydratase;Enoyl-[acyl-carrier-protein] reductase;Oleoyl-[acyl-carrier-protein] hydrolase	FASN	CATALYTIC ACTIVITY: Acetyl-CoA + n malonyl-CoA + 2n NADPH = a long-chain fatty acid + (n+1) CoA + n CO(2) + 2n NADP(+). {ECO:0000269|PubMed:7567999}.;CATALYTIC ACTIVITY: Acetyl-CoA + [acyl-carrier-protein] = CoA + acetyl-[acyl-carrier-protein]. {ECO:0000269|PubMed:7567999}.;CATALYTIC ACTIVITY: Malonyl-CoA + an [acyl-carrier-protein] = CoA + a malonyl-[acyl-carrier-protein]. {ECO:0000269|PubMed:75…	2.3.1.85;2.3.1.38;2.3.1.39;2.3.1.41;1.1.1.100;4.2.1.59;1.3.1.39;3.1.2.14	ACT_SITE 161 161 For beta-ketoacyl synthase activity. {ECO:0000255|PROSITE-ProRule:PRU10022}.;ACT_SITE 581 581 For malonyltransferase activity. {ECO:0000255|PROSITE-ProRule:PRU10022}.;ACT_SITE 878 878 For beta-hydroxyacyl dehydratase activity. {ECO:0000255|PROSITE-ProRule:PRU10022}.;ACT_SITE 2308 2308 For thioesterase activity. {ECO:0000255|PROSITE-ProRule:PRU10022, ECO:0000269|PubMed:17618296}.;…	acetyl-CoA metabolic process [GO:0006084];cellular response to interleukin-4 [GO:0071353];fatty acid biosynthetic process [GO:0006633];fatty acid metabolic process [GO:0006631];long-chain fatty-acyl-CoA biosynthetic process [GO:0035338];mammary gland development [GO:0030879];osteoblast differentiation [GO:0001649];pantothenate metabolic process [GO:0015939];positive regulation of cellular metabol…	[acyl-carrier-protein] S-acetyltransferase activity [GO:0004313];[acyl-carrier-protein] S-malonyltransferase activity [GO:0004314];3-hydroxyoctanoyl-[acyl-carrier-protein] dehydratase activity [GO:0047451];3-hydroxypalmitoyl-[acyl-carrier-protein] dehydratase activity [GO:0004317];3-oxoacyl-[acyl-carrier-protein] reductase (NADPH) activity [GO:0004316];3-oxoacyl-[acyl-carrier-protein] synthase ac…	cell-cell adherens junction [GO:0005913];cytoplasm [GO:0005737];cytosol [GO:0005829];extracellular exosome [GO:0070062];glycogen granule [GO:0042587];Golgi apparatus [GO:0005794];melanosome [GO:0042470];membrane [GO:0016020];mitochondrion [GO:0005739];plasma membrane [GO:0005886]	GO:0001649;GO:0004312;GO:0004313;GO:0004314;GO:0004315;GO:0004316;GO:0004317;GO:0004319;GO:0004320;GO:0005737;GO:0005739;GO:0005794;GO:0005829;GO:0005886;GO:0005913;GO:0006084;GO:0006631;GO:0006633;GO:0008144;GO:0015939;GO:0016020;GO:0016295;GO:0016296;GO:0030879;GO:0031177;GO:0031325;GO:0035338;GO:0042470;GO:0042587;GO:0044822;GO:0047117;GO:0047451;GO:0070062;GO:0070402;GO:0071353;GO:0098641;GO:…
21.1733	21.4112	21.8296	23.8693	23.2784	23.2373	17.9865	19.0697	19.6392	20.16	20.449	19.3916	+	3.27177	2.15536	1.99029		NaN	NaN	1.10175	Q9HB40;I3L4Z3;I3L506;I3L2N6	Q9HB40;I3L4Z3	Retinoid-inducible serine carboxypeptidase	SCPEP1		3.4.16.-	ACT_SITE 167 167 {ECO:0000255|PROSITE-ProRule:PRU10074}.;ACT_SITE 371 371 {ECO:0000255|PROSITE-ProRule:PRU10074}.;ACT_SITE 431 431 {ECO:0000255|PROSITE-ProRule:PRU10074}.	negative regulation of blood pressure [GO:0045776];positive regulation of vasodilation [GO:0045909];proteolysis involved in cellular protein catabolic process [GO:0051603];retinoic acid metabolic process [GO:0042573]	serine-type carboxypeptidase activity [GO:0004185];serine-type carboxypeptidase activity [GO:0004185];serine-type carboxypeptidase activity [GO:0004185];serine-type carboxypeptidase activity [GO:0004185]	cytosol [GO:0005829];extracellular exosome [GO:0070062]	GO:0004185;GO:0005829;GO:0042573;GO:0045776;GO:0045909;GO:0051603;GO:0070062;GO:0004185;GO:0004185;GO:0004185
19.8066	20.36	20.0526	21.3822	20.2703	20.581	25.4243	25.4072	25.2603	19.3932	19.6356	19.1348		NaN	NaN	0.671451	+	6.22907	-5.64371	-5.97605	P49207	P49207	60S ribosomal protein L34	RPL34				nuclear-transcribed mRNA catabolic process, nonsense-mediated decay [GO:0000184];ribosome biogenesis [GO:0042254];rRNA processing [GO:0006364];SRP-dependent cotranslational protein targeting to membrane [GO:0006614];translation [GO:0006412];translational initiation [GO:0006413];viral transcription [GO:0019083]	cadherin binding involved in cell-cell adhesion [GO:0098641];RNA binding [GO:0003723];structural constituent of ribosome [GO:0003735]	cell-cell adherens junction [GO:0005913];cytoplasm [GO:0005737];cytosol [GO:0005829];cytosolic large ribosomal subunit [GO:0022625];extracellular exosome [GO:0070062];mitochondrion [GO:0005739];nucleolus [GO:0005730]	GO:0000184;GO:0003723;GO:0003735;GO:0005730;GO:0005737;GO:0005739;GO:0005829;GO:0005913;GO:0006364;GO:0006412;GO:0006413;GO:0006614;GO:0019083;GO:0022625;GO:0042254;GO:0070062;GO:0098641
20.893	20.5558	20.8808	21.099	20.2699	20.8106	24.0426	24.1977	24.1669	20.2801	20.6463	19.5198		NaN	NaN	-0.0500329	+	3.46819	-4.64478	-3.987	P07602;C9JIZ6;Q5BJH1;A0A0J9YXB8	P07602;C9JIZ6;Q5BJH1	Prosaposin;Saposin-A;Saposin-B-Val;Saposin-B;Saposin-C;Saposin-D	PSAP				adenylate cyclase-inhibiting G-protein coupled receptor signaling pathway [GO:0007193];cellular response to organic substance [GO:0071310];epithelial cell differentiation involved in prostate gland development [GO:0060742];glycosphingolipid metabolic process [GO:0006687];lipid transport [GO:0006869];negative regulation of hydrogen peroxide-induced cell death [GO:1903206];platelet degranulation [G…	enzyme activator activity [GO:0008047];G-protein coupled receptor binding [GO:0001664];lipid binding [GO:0008289]	cytoplasm [GO:0005737];extracellular exosome [GO:0070062];extracellular region [GO:0005576];extracellular space [GO:0005615];integral component of membrane [GO:0016021];lysosomal lumen [GO:0043202];lysosomal membrane [GO:0005765];lysosome [GO:0005764];mitochondrion [GO:0005739];lysosome [GO:0005764];lysosome [GO:0005764];lysosome [GO:0005764]	GO:0001664;GO:0002576;GO:0005576;GO:0005615;GO:0005737;GO:0005739;GO:0005764;GO:0005765;GO:0006687;GO:0006869;GO:0007193;GO:0008047;GO:0008289;GO:0010506;GO:0016021;GO:0019216;GO:0043202;GO:0043410;GO:0060736;GO:0060742;GO:0070062;GO:0071310;GO:1903206;GO:0005764;GO:0006665;GO:0005764;GO:0006665;GO:0005764;GO:0006665
21.8865	20.7556	20.7066	20.8043	20.3823	20.7064	22.7965	22.7136	22.8852	19.2135	19.0942	19.0853		NaN	NaN	-0.485242	+	2.59032	-3.04755	-3.66743	Q96T76;Q5T454;H0Y746;H7C1W5;B0QZ77;H0Y7V3;F8WCH8	Q96T76;Q5T454	MMS19 nucleotide excision repair protein homolog	MMS19				cellular response to DNA damage stimulus [GO:0006974];chromosome segregation [GO:0007059];DNA metabolic process [GO:0006259];DNA repair [GO:0006281];iron-sulfur cluster assembly [GO:0016226];nucleotide-excision repair [GO:0006289];phosphorelay signal transduction system [GO:0000160];positive regulation of transcription, DNA-templated [GO:0045893];response to hormone [GO:0009725];transcription, DN…	estrogen receptor binding [GO:0030331];protein binding, bridging [GO:0030674];receptor signaling complex scaffold activity [GO:0030159];transcription coactivator activity [GO:0003713]	CIA complex [GO:0097361];cytoplasm [GO:0005737];holo TFIIH complex [GO:0005675];membrane [GO:0016020];MMXD complex [GO:0071817];nucleoplasm [GO:0005654];nucleus [GO:0005634];spindle [GO:0005819]	GO:0000160;GO:0003713;GO:0005634;GO:0005654;GO:0005675;GO:0005737;GO:0005819;GO:0006259;GO:0006281;GO:0006289;GO:0006351;GO:0006974;GO:0007059;GO:0009725;GO:0016020;GO:0016226;GO:0030159;GO:0030331;GO:0030674;GO:0045893;GO:0071817;GO:0097361
21.646	21.6818	20.6736	20.8404	21.2648	20.5352	23.6685	23.4901	23.2422	19.7427	20.0859	19.6275		NaN	NaN	-0.453612	+	2.93715	-3.53776	-3.64822	K7EJT5;K7EP65;K7EKS7;K7ELC4;K7EMH1;K7ERI7;P35268	K7EJT5;K7EP65;K7EKS7;K7ELC4;K7EMH1;K7ERI7;P35268	60S ribosomal protein L22	RPL22				alpha-beta T cell differentiation [GO:0046632];cytoplasmic translation [GO:0002181];nuclear-transcribed mRNA catabolic process, nonsense-mediated decay [GO:0000184];rRNA processing [GO:0006364];SRP-dependent cotranslational protein targeting to membrane [GO:0006614];translation [GO:0006412];translational initiation [GO:0006413];viral transcription [GO:0019083];translation [GO:0006412];translation…	heparin binding [GO:0008201];poly(A) RNA binding [GO:0044822];RNA binding [GO:0003723];structural constituent of ribosome [GO:0003735];structural constituent of ribosome [GO:0003735];structural constituent of ribosome [GO:0003735];structural constituent of ribosome [GO:0003735];structural constituent of ribosome [GO:0003735];structural constituent of ribosome [GO:0003735];structural constituent o…	cytoplasm [GO:0005737];cytosol [GO:0005829];cytosolic large ribosomal subunit [GO:0022625];extracellular exosome [GO:0070062];extracellular matrix [GO:0031012];focal adhesion [GO:0005925];intracellular ribonucleoprotein complex [GO:0030529];nucleus [GO:0005634];ribosome [GO:0005840];ribosome [GO:0005840];ribosome [GO:0005840];ribosome [GO:0005840];ribosome [GO:0005840];ribosome [GO:0005840]	GO:0000184;GO:0002181;GO:0003723;GO:0003735;GO:0005634;GO:0005737;GO:0005829;GO:0005925;GO:0006364;GO:0006412;GO:0006413;GO:0006614;GO:0008201;GO:0019083;GO:0022625;GO:0030529;GO:0031012;GO:0044822;GO:0046632;GO:0070062;GO:0003735;GO:0005840;GO:0006412;GO:0003735;GO:0005840;GO:0006412;GO:0003735;GO:0005840;GO:0006412;GO:0003735;GO:0005840;GO:0006412;GO:0003735;GO:0005840;GO:0006412;GO:0003735;GO:…
19.2889	21.4135	20.1428	21.502	21.847	20.6742	23.4804	23.615	23.8965	19.7913	19.8222	20.5853		NaN	NaN	1.0593	+	4.32713	-3.36248	-3.59771	J3KRA9;Q96Q15;I3L144;H3BQN7	J3KRA9;Q96Q15	Serine/threonine-protein kinase SMG1	SMG1	CATALYTIC ACTIVITY: ATP + a protein = ADP + a phosphoprotein. {ECO:0000269|PubMed:19417104}.;CATALYTIC ACTIVITY: ATP + a protein = ADP + a phosphoprotein. {ECO:0000256|SAAS:SAAS00545826}.	2.7.11.1		DNA repair [GO:0006281];mRNA export from nucleus [GO:0006406];nuclear-transcribed mRNA catabolic process, nonsense-mediated decay [GO:0000184];peptidyl-serine phosphorylation [GO:0018105];phosphatidylinositol phosphorylation [GO:0046854];protein autophosphorylation [GO:0046777];response to stress [GO:0006950];telomere maintenance [GO:0000723];nuclear-transcribed mRNA catabolic process, nonsense-m…	ATP binding [GO:0005524];metal ion binding [GO:0046872];poly(A) RNA binding [GO:0044822];protein kinase activity [GO:0004672];protein serine/threonine kinase activity [GO:0004674];telomeric DNA binding [GO:0042162];protein serine/threonine kinase activity [GO:0004674];protein serine/threonine kinase activity [GO:0004674];ATP binding [GO:0005524];protein serine/threonine kinase activity [GO:000467…	cytoplasm [GO:0005737];cytosol [GO:0005829];nucleus [GO:0005634]	GO:0000184;GO:0000723;GO:0004672;GO:0004674;GO:0005524;GO:0005634;GO:0005737;GO:0005829;GO:0006281;GO:0006406;GO:0006950;GO:0018105;GO:0042162;GO:0044822;GO:0046777;GO:0046854;GO:0046872;GO:0000184;GO:0004674;GO:0000184;GO:0004674;GO:0000184;GO:0004674;GO:0005524
20.0554	21.3171	20.7613	21.1608	20.0697	20.2464	23.015	22.861	23.4082	19.9992	19.1138	19.9674		NaN	NaN	-0.218969	+	2.69532	-2.95088	-3.40124	B7Z9I1;Q5T4U5;P11310;E9PJM9;E9PRX4	B7Z9I1;Q5T4U5;P11310;E9PJM9	Medium-chain specific acyl-CoA dehydrogenase, mitochondrial	ACADM	CATALYTIC ACTIVITY: A medium-chain acyl-CoA + electron-transfer flavoprotein = a medium-chain trans-2,3-dehydroacyl-CoA + reduced electron-transfer flavoprotein.	1.3.8.7	ACT_SITE 401 401 Proton acceptor.	carnitine biosynthetic process [GO:0045329];carnitine metabolic process, CoA-linked [GO:0019254];fatty acid beta-oxidation [GO:0006635];fatty acid beta-oxidation using acyl-CoA dehydrogenase [GO:0033539];lipid homeostasis [GO:0055088];medium-chain fatty acid catabolic process [GO:0051793];medium-chain fatty acid metabolic process [GO:0051791];oxidation-reduction process [GO:0055114];cardiac muscl…	acyl-CoA dehydrogenase activity [GO:0003995];electron carrier activity [GO:0009055];fatty-acyl-CoA binding [GO:0000062];flavin adenine dinucleotide binding [GO:0050660];identical protein binding [GO:0042802];medium-chain-acyl-CoA dehydrogenase activity [GO:0070991];oxidoreductase activity, acting on the CH-CH group of donors, with a flavin as acceptor [GO:0052890];flavin adenine dinucleotide bind…	axon [GO:0030424];extracellular exosome [GO:0070062];mitochondrial matrix [GO:0005759];mitochondrion [GO:0005739];nucleus [GO:0005634];mitochondrion [GO:0005739];mitochondrion [GO:0005739]	GO:0000062;GO:0003995;GO:0005634;GO:0005739;GO:0005759;GO:0006635;GO:0009055;GO:0019254;GO:0030424;GO:0033539;GO:0042802;GO:0045329;GO:0050660;GO:0051791;GO:0051793;GO:0052890;GO:0055088;GO:0055114;GO:0070062;GO:0070991;GO:0001889;GO:0005739;GO:0005978;GO:0006111;GO:0009409;GO:0009791;GO:0019254;GO:0033539;GO:0042594;GO:0050660;GO:0051791;GO:0055007;GO:0070991;GO:0003995;GO:0005739;GO:0050660;GO:…
20.811	23.7776	20.2753	21.0841	22.7722	22.9581	23.2109	23.6135	23.389	19.8896	19.5378	20.6533		0.0173325	-0.0573584	0.650178	+	2.51319	-3.59125	-3.37757	H0YDU8;P53041;A8MU39	H0YDU8;P53041;A8MU39	Serine/threonine-protein phosphatase;Serine/threonine-protein phosphatase 5	PPP5C	CATALYTIC ACTIVITY: [a protein]-serine/threonine phosphate + H(2)O = [a protein]-serine/threonine + phosphate.;CATALYTIC ACTIVITY: [a protein]-serine/threonine phosphate + H(2)O = [a protein]-serine/threonine + phosphate. {ECO:0000256|RuleBase:RU004273}.;CATALYTIC ACTIVITY: [a protein]-serine/threonine phosphate + H(2)O = [a protein]-serine/threonine + phosphate. {ECO:0000256|RuleBase:RU004273}.	3.1.3.16;3.1.3.16;3.1.3.16	ACT_SITE 304 304 Proton donor/acceptor. {ECO:0000269|PubMed:15155720}.	cellular response to cadmium ion [GO:0071276];cellular response to hydrogen peroxide [GO:0070301];DNA repair [GO:0006281];histone dephosphorylation [GO:0016576];MAPK cascade [GO:0000165];mitotic nuclear division [GO:0007067];negative regulation of neuron death [GO:1901215];negative regulation of protein phosphorylation [GO:0001933];positive regulation of glucocorticoid receptor signaling pathway …	ADP binding [GO:0043531];ATP binding [GO:0005524];identical protein binding [GO:0042802];lipid binding [GO:0008289];metal ion binding [GO:0046872];phosphoprotein phosphatase activity [GO:0004721];protein serine/threonine phosphatase activity [GO:0004722];RNA binding [GO:0003723];signal transducer activity [GO:0004871];phosphoprotein phosphatase activity [GO:0004721];phosphoprotein phosphatase act…	cytoplasm [GO:0005737];cytosol [GO:0005829];intracellular membrane-bounded organelle [GO:0043231];nucleoplasm [GO:0005654];nucleus [GO:0005634];perikaryon [GO:0043204];plasma membrane [GO:0005886];protein complex [GO:0043234];proximal dendrite [GO:1990635];intracellular membrane-bounded organelle [GO:0043231];nucleoplasm [GO:0005654]	GO:0000165;GO:0001933;GO:0003723;GO:0004721;GO:0004722;GO:0004871;GO:0005524;GO:0005634;GO:0005654;GO:0005737;GO:0005829;GO:0005886;GO:0006281;GO:0006351;GO:0006470;GO:0007067;GO:0008289;GO:0010288;GO:0016576;GO:0042802;GO:0043123;GO:0043204;GO:0043231;GO:0043234;GO:0043278;GO:0043531;GO:0046872;GO:0051291;GO:0070301;GO:0071276;GO:1901215;GO:1990635;GO:2000324;GO:0004721;GO:0005654;GO:0043231;GO:…
21.4415	21.545	21.3378	21.7321	21.2615	21.2413	22.9426	22.8003	22.9268	20.2134	20.1319	18.3094		NaN	NaN	-0.0298208	+	2.51825	-2.93487	-3.33831	O75131;A0A087WYQ3;H0YB26;E7ENV7;Q96FN4;Q8IYJ1;Q96A23;O95741;Q86YQ8;Q9HCH3;Q9UBL6	O75131	Copine-3	CPNE3				cellular response to calcium ion [GO:0071277];cellular response to growth factor stimulus [GO:0071363];ERBB2 signaling pathway [GO:0038128];glycerophospholipid biosynthetic process [GO:0046474];lipid metabolic process [GO:0006629];positive regulation of cell migration [GO:0030335];vesicle-mediated transport [GO:0016192];cellular response to calcium ion [GO:0071277];chemical synaptic transmission …	calcium-dependent phospholipid binding [GO:0005544];calcium-dependent protein binding [GO:0048306];poly(A) RNA binding [GO:0044822];protein serine/threonine kinase activity [GO:0004674];receptor tyrosine kinase binding [GO:0030971];transporter activity [GO:0005215];calcium ion binding [GO:0005509];phosphatidylserine binding [GO:0001786];transporter activity [GO:0005215];transporter activity [GO:0…	extracellular exosome [GO:0070062];cell junction [GO:0030054];cytoplasm [GO:0005737];cytosol [GO:0005829];extracellular exosome [GO:0070062];focal adhesion [GO:0005925];nucleus [GO:0005634];plasma membrane [GO:0005886];axon [GO:0030424];clathrin-coated endocytic vesicle [GO:0045334];dendrite [GO:0030425];endosome [GO:0005768];extracellular exosome [GO:0070062];membrane [GO:0016020];perikaryon [GO…	GO:0070062;GO:0004674;GO:0005215;GO:0005544;GO:0005634;GO:0005737;GO:0005829;GO:0005886;GO:0005925;GO:0006629;GO:0016192;GO:0030054;GO:0030335;GO:0030971;GO:0038128;GO:0044822;GO:0046474;GO:0048306;GO:0070062;GO:0071277;GO:0071363;GO:0001786;GO:0005215;GO:0005509;GO:0005768;GO:0005886;GO:0006629;GO:0007268;GO:0007399;GO:0016020;GO:0016192;GO:0030424;GO:0030425;GO:0043204;GO:0045334;GO:0046474;GO:…
20.6782	20.7901	20.1571	20.569	21.0224	21.3304	22.8246	23.0724	23.0884	19.8599	19.2232	19.9265		NaN	NaN	0.432114	+	4.33917	-3.27421	-3.32527	P62873;F6UT28;B1AKQ8;F6X3N5;F5H8J8;F5H100;B3KVK2;F5H0S8;E9PCP0;P16520;C9JD14	P62873;F6UT28;B1AKQ8;F6X3N5	Guanine nucleotide-binding protein G(I)/G(S)/G(T) subunit beta-1	GNB1				adenylate cyclase-activating dopamine receptor signaling pathway [GO:0007191];cardiac muscle cell apoptotic process [GO:0010659];cell proliferation [GO:0008283];cellular response to catecholamine stimulus [GO:0071870];cellular response to glucagon stimulus [GO:0071377];cellular response to hypoxia [GO:0071456];cellular response to prostaglandin E stimulus [GO:0071380];G-protein coupled acetylchol…	alkylglycerophosphoethanolamine phosphodiesterase activity [GO:0047391];GTPase activity [GO:0003924];GTPase binding [GO:0051020];protein complex binding [GO:0032403];signal transducer activity [GO:0004871];GTPase activity [GO:0003924];GTPase binding [GO:0051020];signal transducer activity [GO:0004871]	cell body [GO:0044297];cytosol [GO:0005829];dendrite [GO:0030425];extracellular exosome [GO:0070062];extracellular vesicle [GO:1903561];heterotrimeric G-protein complex [GO:0005834];intracellular [GO:0005622];lysosomal membrane [GO:0005765];membrane [GO:0016020];myelin sheath [GO:0043209];photoreceptor disc membrane [GO:0097381];photoreceptor inner segment [GO:0001917];photoreceptor outer segment…	GO:0001917;GO:0003924;GO:0004871;GO:0005622;GO:0005765;GO:0005829;GO:0005834;GO:0005886;GO:0006457;GO:0007165;GO:0007191;GO:0007200;GO:0007204;GO:0007213;GO:0007223;GO:0007265;GO:0008283;GO:0010659;GO:0016020;GO:0016056;GO:0030168;GO:0030425;GO:0032403;GO:0042622;GO:0043209;GO:0044297;GO:0047391;GO:0050909;GO:0051020;GO:0060041;GO:0070062;GO:0070208;GO:0071377;GO:0071380;GO:0071456;GO:0071870;GO:…
20.6235	19.4639	20.4443	20.7909	20.9134	21.8508	22.6461	22.6223	22.8606	20.2255	19.307	18.6995		NaN	NaN	1.00782	+	2.99104	-2.62166	-3.299	A0A087WZ13;E9PAU2;Q8IY67;K7EKR9	A0A087WZ13;E9PAU2;Q8IY67	Ribonucleoprotein PTB-binding 1	RAVER1				mRNA splicing, via spliceosome [GO:0000398]	nucleic acid binding [GO:0003676];nucleotide binding [GO:0000166];poly(A) RNA binding [GO:0044822];nucleic acid binding [GO:0003676];nucleotide binding [GO:0000166];nucleic acid binding [GO:0003676];nucleotide binding [GO:0000166];nucleotide binding [GO:0000166]	cytoplasm [GO:0005737];nucleus [GO:0005634]	GO:0000166;GO:0000398;GO:0003676;GO:0005634;GO:0005737;GO:0044822;GO:0000166;GO:0003676;GO:0000166;GO:0003676;GO:0000166
21.5457	24.4661	24.5376	21.63	20.983	20.2898	23.3737	23.3633	22.8336	19.251	20.3387	20.4394		NaN	NaN	-2.54885	+	3.81866	-3.69734	-3.18052	P14174	P14174	Macrophage migration inhibitory factor	MIF	CATALYTIC ACTIVITY: Keto-phenylpyruvate = enol-phenylpyruvate.;CATALYTIC ACTIVITY: L-dopachrome = 5,6-dihydroxyindole-2-carboxylate.	5.3.2.1;5.3.3.12	ACT_SITE 2 2 Proton acceptor;via imino nitrogen.	carboxylic acid metabolic process [GO:0019752];cell aging [GO:0007569];cell proliferation [GO:0008283];cell surface receptor signaling pathway [GO:0007166];DNA damage response, signal transduction by p53 class mediator [GO:0030330];inflammatory response [GO:0006954];innate immune response [GO:0045087];leukocyte migration [GO:0050900];negative regulation of apoptotic process [GO:0043066];negative …	chemoattractant activity [GO:0042056];cytokine activity [GO:0005125];cytokine receptor binding [GO:0005126];dopachrome isomerase activity [GO:0004167];phenylpyruvate tautomerase activity [GO:0050178];receptor binding [GO:0005102]	cell surface [GO:0009986];cytoplasm [GO:0005737];extracellular exosome [GO:0070062];extracellular region [GO:0005576];extracellular space [GO:0005615];myelin sheath [GO:0043209];nucleoplasm [GO:0005654];vesicle [GO:0031982]	GO:0001516;GO:0002906;GO:0004167;GO:0005102;GO:0005125;GO:0005126;GO:0005576;GO:0005615;GO:0005654;GO:0005737;GO:0006954;GO:0007166;GO:0007569;GO:0008283;GO:0009986;GO:0010629;GO:0010739;GO:0019752;GO:0030330;GO:0030890;GO:0031666;GO:0031982;GO:0032269;GO:0033033;GO:0033138;GO:0042056;GO:0042327;GO:0043030;GO:0043066;GO:0043209;GO:0043406;GO:0043518;GO:0045087;GO:0048146;GO:0050178;GO:0050715;GO:…
22.7149	22.7244	22.829	20.851	22.4453	22.7434	22.5737	22.7013	22.4902	19.3953	20.6031	19.289		0.550727	-0.788907	-0.742863	+	3.2121	-2.74826	-2.82596	P41240;H3BUM9;H3BU69;K7ENL8;K7ES68;K7EQY5;P42679	P41240	Tyrosine-protein kinase CSK	CSK	CATALYTIC ACTIVITY: ATP + a [protein]-L-tyrosine = ADP + a [protein]-L-tyrosine phosphate. {ECO:0000269|PubMed:1639064, ECO:0000269|PubMed:7683130, ECO:0000269|PubMed:9281320}.;CATALYTIC ACTIVITY: ATP + a [protein]-L-tyrosine = ADP + a [protein]-L-tyrosine phosphate. {ECO:0000255|PROSITE-ProRule:PRU10028}.;CATALYTIC ACTIVITY: ATP + a [protein]-L-tyrosine = ADP + a [protein]-L-tyrosine phosphate. …	2.7.10.2;2.7.10.2;2.7.10.2;2.7.10.2	ACT_SITE 314 314 Proton acceptor. {ECO:0000255|PROSITE-ProRule:PRU00159, ECO:0000255|PROSITE-ProRule:PRU10028}.;ACT_SITE 352 352 Proton acceptor. {ECO:0000255|PROSITE-ProRule:PRU00159, ECO:0000255|PROSITE-ProRule:PRU10028}.	adaptive immune response [GO:0002250];adherens junction organization [GO:0034332];brain development [GO:0007420];cell differentiation [GO:0030154];cell migration [GO:0016477];cellular response to peptide hormone stimulus [GO:0071375];central nervous system development [GO:0007417];epidermal growth factor receptor signaling pathway [GO:0007173];innate immune response [GO:0045087];negative regulati…	ATP binding [GO:0005524];identical protein binding [GO:0042802];kinase activity [GO:0016301];metal ion binding [GO:0046872];non-membrane spanning protein tyrosine kinase activity [GO:0004715];protein C-terminus binding [GO:0008022];protein kinase A catalytic subunit binding [GO:0034236];protein tyrosine kinase activity [GO:0004713];receptor binding [GO:0005102];ATP binding [GO:0005524];non-membra…	cell-cell junction [GO:0005911];cytoplasm [GO:0005737];cytosol [GO:0005829];extracellular exosome [GO:0070062];extrinsic component of cytoplasmic side of plasma membrane [GO:0031234];membrane raft [GO:0045121];plasma membrane [GO:0005886];cytosol [GO:0005829];extrinsic component of cytoplasmic side of plasma membrane [GO:0031234]	GO:0001817;GO:0002250;GO:0004713;GO:0004715;GO:0005102;GO:0005524;GO:0005737;GO:0005829;GO:0005886;GO:0005911;GO:0006468;GO:0007169;GO:0007173;GO:0007417;GO:0007420;GO:0008022;GO:0008285;GO:0010989;GO:0016301;GO:0016477;GO:0030154;GO:0031234;GO:0031295;GO:0032715;GO:0033673;GO:0034236;GO:0034332;GO:0038083;GO:0042127;GO:0042802;GO:0042997;GO:0043406;GO:0045087;GO:0045121;GO:0045779;GO:0046872;GO:…
21.9068	21.4171	20.6031	20.0159	20.9391	21.2942	22.3462	22.1927	22.2259	20.2784	19.5969	18.7476		NaN	NaN	-0.559249	+	2.26373	-1.98062	-2.71397	Q15031;E9PHM2;C9JYR8;C9IZR7	Q15031;E9PHM2	Probable leucine--tRNA ligase, mitochondrial	LARS2	CATALYTIC ACTIVITY: ATP + L-leucine + tRNA(Leu) = AMP + diphosphate + L-leucyl-tRNA(Leu).	6.1.1.4		leucyl-tRNA aminoacylation [GO:0006429];mitochondrial translation [GO:0032543];tRNA aminoacylation for protein translation [GO:0006418];leucyl-tRNA aminoacylation [GO:0006429];leucyl-tRNA aminoacylation [GO:0006429];leucyl-tRNA aminoacylation [GO:0006429]	aminoacyl-tRNA editing activity [GO:0002161];ATP binding [GO:0005524];leucine-tRNA ligase activity [GO:0004823];aminoacyl-tRNA editing activity [GO:0002161];ATP binding [GO:0005524];leucine-tRNA ligase activity [GO:0004823];ATP binding [GO:0005524];leucine-tRNA ligase activity [GO:0004823];ATP binding [GO:0005524];leucine-tRNA ligase activity [GO:0004823]	mitochondrial matrix [GO:0005759];mitochondrion [GO:0005739]	GO:0002161;GO:0004823;GO:0005524;GO:0005739;GO:0005759;GO:0006418;GO:0006429;GO:0032543;GO:0002161;GO:0004823;GO:0005524;GO:0006429;GO:0004823;GO:0005524;GO:0006429;GO:0004823;GO:0005524;GO:0006429
19.9943	21.303	20.0864	20.7243	21.0097	22.8192	22.4474	22.5213	22.5702	20.1507	19.4059	19.8685		NaN	NaN	1.05653	+	3.46298	-2.55257	-2.7046	P49321;H0YDS9;Q5T624;E9PPQ8;E9PI86;E9PRH9;H0YF33;E9PPR5	P49321;H0YDS9;Q5T624	Nuclear autoantigenic sperm protein	NASP				blastocyst development [GO:0001824];cell cycle [GO:0007049];cell proliferation [GO:0008283];DNA replication [GO:0006260];DNA replication-dependent nucleosome assembly [GO:0006335];DNA replication-independent nucleosome assembly [GO:0006336];histone exchange [GO:0043486];male gonad development [GO:0008584];nucleosome assembly [GO:0006334];protein transport [GO:0015031];response to testosterone [GO…	Hsp90 protein binding [GO:0051879];protein complex binding [GO:0032403]	cytoplasm [GO:0005737];nuclear chromatin [GO:0000790];nucleoplasm [GO:0005654];nucleus [GO:0005634];protein complex [GO:0043234];nucleoplasm [GO:0005654];nucleoplasm [GO:0005654];nucleoplasm [GO:0005654];nucleoplasm [GO:0005654]	GO:0000790;GO:0001824;GO:0005634;GO:0005654;GO:0005737;GO:0006260;GO:0006334;GO:0006335;GO:0006336;GO:0007049;GO:0008283;GO:0008584;GO:0015031;GO:0032403;GO:0033574;GO:0043234;GO:0043486;GO:0051879;GO:0005654;GO:0005654;GO:0005654;GO:0005654
21.5779	20.7376	20.6964	21.488	21.6261	21.7815	22.9939	22.9562	23.3099	20.1816	20.6783	20.4368		NaN	NaN	0.627877	+	4.46051	-3.48045	-2.65442	Q96PE3;B8ZZB2	Q96PE3;B8ZZB2	Type I inositol 3,4-bisphosphate 4-phosphatase	INPP4A	CATALYTIC ACTIVITY: 1-phosphatidyl-myo-inositol 3,4-bisphosphate + H(2)O = 1-phosphatidyl-1D-myo-inositol 3-phosphate + phosphate.	3.1.3.66		inositol phosphate metabolic process [GO:0043647];phosphatidylinositol biosynthetic process [GO:0006661];signal transduction [GO:0007165]	inositol-1,3,4-trisphosphate 4-phosphatase activity [GO:0017161];inositol-3,4-bisphosphate 4-phosphatase activity [GO:0052828];phosphatidylinositol-3,4-bisphosphate 4-phosphatase activity [GO:0016316];phosphatidylinositol-4,5-bisphosphate 4-phosphatase activity [GO:0034597]	cytoplasm [GO:0005737];cytosol [GO:0005829]	GO:0005737;GO:0005829;GO:0006661;GO:0007165;GO:0016316;GO:0017161;GO:0034597;GO:0043647;GO:0052828
21.1202	21.5617	20.2476	21.1353	20.756	19.7528	22.8021	22.6668	22.6317	20.9756	19.7907	19.5263		NaN	NaN	-0.428485	+	2.13574	-2.80093	-2.60266	E9PLD0;Q9H0U4;P62820;E7END7;Q92928;H0YLJ8;H0YL94;H0YMN7;P51153;P59190	E9PLD0;Q9H0U4;P62820;E7END7;Q92928	Ras-related protein Rab-1B;Ras-related protein Rab-1A;Putative Ras-related protein Rab-1C	RAB1B;RAB1A;RAB1C				bicellular tight junction assembly [GO:0070830];cellular response to insulin stimulus [GO:0032869];cortical actin cytoskeleton organization [GO:0030866];endocytic recycling [GO:0032456];endosomal transport [GO:0016197];endothelial cell chemotaxis [GO:0035767];establishment of protein localization to plasma membrane [GO:0090002];establishment of Sertoli cell barrier [GO:0097368];membrane organizat…	GTPase activity [GO:0003924];GTP binding [GO:0005525];GTP binding [GO:0005525];cadherin binding involved in cell-cell adhesion [GO:0098641];GTPase activity [GO:0003924];GTP binding [GO:0005525];GTP binding [GO:0005525];GTP binding [GO:0005525];GTP binding [GO:0005525];GTP binding [GO:0005525];GTP binding [GO:0005525];GTP binding [GO:0005525];GTP binding [GO:0005525]	bicellular tight junction [GO:0005923];cytoplasm [GO:0005737];cytoplasmic vesicle [GO:0031410];cytoplasmic vesicle membrane [GO:0030659];endocytic vesicle [GO:0030139];extracellular exosome [GO:0070062];insulin-responsive compartment [GO:0032593];lamellipodium [GO:0030027];lateral plasma membrane [GO:0016328];neuron projection [GO:0043005];plasma membrane [GO:0005886];recycling endosome [GO:00550…	GO:0003924;GO:0005525;GO:0005737;GO:0005802;GO:0005886;GO:0005923;GO:0006904;GO:0007264;GO:0009306;GO:0010737;GO:0016197;GO:0016328;GO:0030027;GO:0030139;GO:0030659;GO:0030866;GO:0031175;GO:0031410;GO:0032456;GO:0032593;GO:0032869;GO:0035767;GO:0043005;GO:0044795;GO:0055037;GO:0055038;GO:0061024;GO:0070062;GO:0070830;GO:0090002;GO:0097368;GO:1902463;GO:0000139;GO:0005525;GO:0005739;GO:0005789;GO:…
21.5704	21.4259	21.0236	21.6253	20.6678	20.6421	22.0512	22.0832	22.8153	19.8248	19.9146	19.5111		NaN	NaN	-0.36156	+	2.64042	-2.22021	-2.56639	F8WAE5;Q9BY44;C9IZE1;F8WF18;F8WAT3;H7C5Q3	F8WAE5;Q9BY44;C9IZE1	Eukaryotic translation initiation factor 2A;Eukaryotic translation initiation factor 2A, N-terminally processed	EIF2A				positive regulation of signal transduction [GO:0009967];protein phosphorylation [GO:0006468];regulation of translation [GO:0006417];response to amino acid starvation [GO:1990928];ribosome assembly [GO:0042255];SREBP signaling pathway [GO:0032933]	cadherin binding involved in cell-cell adhesion [GO:0098641];mRNA binding [GO:0003729];ribosome binding [GO:0043022];translation initiation factor activity [GO:0003743];tRNA binding [GO:0000049];translation initiation factor activity [GO:0003743]	blood microparticle [GO:0072562];cell-cell adherens junction [GO:0005913];cytoplasm [GO:0005737];cytosolic small ribosomal subunit [GO:0022627];eukaryotic translation initiation factor 2 complex [GO:0005850];extracellular space [GO:0005615]	GO:0000049;GO:0003729;GO:0003743;GO:0005615;GO:0005737;GO:0005850;GO:0005913;GO:0006417;GO:0006468;GO:0009967;GO:0022627;GO:0032933;GO:0042255;GO:0043022;GO:0072562;GO:0098641;GO:1990928;GO:0003743
21.145	21.3955	20.6533	21.027	20.8254	21.1148	22.3608	22.2542	22.7582	19.366	20.237	20.1798		NaN	NaN	-0.075531	+	2.71451	-2.15039	-2.53014	Q9H4L7	Q9H4L7	SWI/SNF-related matrix-associated actin-dependent regulator of chromatin subfamily A containing DEAD/H box 1	SMARCAD1	CATALYTIC ACTIVITY: ATP + H(2)O = ADP + phosphate.	3.6.4.12		ATP-dependent chromatin remodeling [GO:0043044];chromatin organization [GO:0006325];chromatin remodeling [GO:0006338];chromosome separation [GO:0051304];DNA double-strand break processing [GO:0000729];histone H3 deacetylation [GO:0070932];histone H4 deacetylation [GO:0070933];nucleotide metabolic process [GO:0009117];positive regulation of transcription, DNA-templated [GO:0045893];protein homooli…	ATP binding [GO:0005524];DNA binding [GO:0003677];helicase activity [GO:0004386];nucleic acid binding [GO:0003676]	heterochromatin [GO:0000792];nuclear matrix [GO:0016363];nuclear replication fork [GO:0043596];nucleoplasm [GO:0005654];site of double-strand break [GO:0035861]	GO:0000018;GO:0000729;GO:0000792;GO:0003676;GO:0003677;GO:0004386;GO:0005524;GO:0005654;GO:0006325;GO:0006338;GO:0009117;GO:0016363;GO:0035861;GO:0043044;GO:0043596;GO:0045893;GO:0051260;GO:0051304;GO:0070932;GO:0070933
20.0274	21.3418	20.6184	21.2004	19.9387	21.0513	21.8878	22.259	21.7415	20.2036	19.1211	19.5081		NaN	NaN	0.0676155	+	3.87881	-2.3286	-2.35186	Q8IY18	Q8IY18	Structural maintenance of chromosomes protein 5	SMC5				cell division [GO:0051301];cellular response to DNA damage stimulus [GO:0006974];cellular senescence [GO:0090398];double-strand break repair via homologous recombination [GO:0000724];mitotic nuclear division [GO:0007067];positive regulation of chromosome segregation [GO:0051984];positive regulation of maintenance of mitotic sister chromatid cohesion [GO:0034184];protein sumoylation [GO:0016925];r…	ATP binding [GO:0005524]	cell junction [GO:0030054];chromosome, telomeric region [GO:0000781];interchromatin granule [GO:0035061];nucleoplasm [GO:0005654];nucleus [GO:0005634];PML body [GO:0016605];sex chromosome [GO:0000803];site of double-strand break [GO:0035861];Smc5-Smc6 complex [GO:0030915]	GO:0000722;GO:0000724;GO:0000781;GO:0000803;GO:0005524;GO:0005634;GO:0005654;GO:0006974;GO:0007062;GO:0007067;GO:0016605;GO:0016925;GO:0030054;GO:0030915;GO:0034184;GO:0035061;GO:0035861;GO:0051301;GO:0051984;GO:0071139;GO:0090398
20.0793	20.4421	20.6165	21.7171	21.3298	20.848	21.7587	22.1913	21.4599	20.3085	20.2017	18.6405		NaN	NaN	0.918944	+	2.39475	-2.28443	-2.08637	O60566;H3BTB9	O60566	Mitotic checkpoint serine/threonine-protein kinase BUB1 beta	BUB1B	CATALYTIC ACTIVITY: ATP + a protein = ADP + a phosphoprotein.	2.7.11.1	ACT_SITE 882 882 Proton acceptor. {ECO:0000250}.	anaphase-promoting complex-dependent catabolic process [GO:0031145];apoptotic process [GO:0006915];cell division [GO:0051301];cell proliferation [GO:0008283];metaphase/anaphase transition of mitotic cell cycle [GO:0007091];mitotic cell cycle checkpoint [GO:0007093];mitotic nuclear division [GO:0007067];mitotic spindle assembly checkpoint [GO:0007094];negative regulation of ubiquitin-protein ligas…	ATP binding [GO:0005524];protein kinase activity [GO:0004672];protein serine/threonine kinase activity [GO:0004674]	anaphase-promoting complex [GO:0005680];condensed chromosome kinetochore [GO:0000777];condensed chromosome outer kinetochore [GO:0000940];condensed nuclear chromosome kinetochore [GO:0000778];cytoplasm [GO:0005737];cytosol [GO:0005829];kinetochore [GO:0000776];microtubule organizing center [GO:0005815];perinuclear region of cytoplasm [GO:0048471];spindle midzone [GO:0051233]	GO:0000776;GO:0000777;GO:0000778;GO:0000940;GO:0004672;GO:0004674;GO:0005524;GO:0005680;GO:0005737;GO:0005815;GO:0005829;GO:0006915;GO:0007062;GO:0007067;GO:0007091;GO:0007093;GO:0007094;GO:0008283;GO:0031145;GO:0034501;GO:0042787;GO:0043161;GO:0048471;GO:0051233;GO:0051301;GO:0051436;GO:0051437;GO:0007094
20.3125	21.612	21.674	20.9276	20.9293	21.0272	22.1888	22.1194	22.0227	20.4059	19.7199	19.9932		NaN	NaN	-0.238182	+	2.3501	-2.21837	-2.07062	Q8TCS8;F8WBI3;H7BXF6	Q8TCS8	Polyribonucleotide nucleotidyltransferase 1, mitochondrial	PNPT1	CATALYTIC ACTIVITY: RNA(n+1) + phosphate = RNA(n) + a nucleoside diphosphate.	2.7.7.8		cellular response to interferon-beta [GO:0035458];cellular response to oxidative stress [GO:0034599];mitochondrial mRNA catabolic process [GO:0000958];mitochondrial mRNA polyadenylation [GO:0097222];mitochondrial RNA 3'-end processing [GO:0000965];mitochondrial RNA 5'-end processing [GO:0000964];mitochondrial RNA catabolic process [GO:0000957];mitochondrion morphogenesis [GO:0070584];mitotic cell…	3'-5'-exoribonuclease activity [GO:0000175];miRNA binding [GO:0035198];poly(A) RNA binding [GO:0044822];poly(G) binding [GO:0034046];poly(U) RNA binding [GO:0008266];polyribonucleotide nucleotidyltransferase activity [GO:0004654];polyribonucleotide nucleotidyltransferase activity [GO:0004654];RNA binding [GO:0003723]	cytoplasm [GO:0005737];membrane [GO:0016020];mitochondrial degradosome [GO:0045025];mitochondrial intermembrane space [GO:0005758];mitochondrion [GO:0005739]	GO:0000175;GO:0000957;GO:0000958;GO:0000962;GO:0000964;GO:0000965;GO:0004654;GO:0005737;GO:0005739;GO:0005758;GO:0006401;GO:0006402;GO:0008266;GO:0016020;GO:0034046;GO:0034599;GO:0035198;GO:0035458;GO:0035927;GO:0035928;GO:0043457;GO:0043631;GO:0044822;GO:0045025;GO:0045926;GO:0051260;GO:0061014;GO:0070207;GO:0070584;GO:0071042;GO:0071850;GO:0097222;GO:2000627;GO:2000772;GO:0003723;GO:0004654;GO:…
20.2742	20.3622	21.2244	21.1889	20.5281	21.1722	21.3346	21.4381	21.5201	18.8334	20.066	19.3491		NaN	NaN	0.34283	+	2.22557	-2.17831	-2.0148	Q9P253;H0YMC9;H0YLM6	Q9P253	Vacuolar protein sorting-associated protein 18 homolog	VPS18				autophagy [GO:0006914];endosome organization [GO:0007032];endosome to lysosome transport [GO:0008333];intracellular protein transport [GO:0006886];lysosome organization [GO:0007040];regulation of SNARE complex assembly [GO:0035542];vesicle docking involved in exocytosis [GO:0006904];viral entry into host cell [GO:0046718]	metal ion binding [GO:0046872];protein binding, bridging [GO:0030674];syntaxin binding [GO:0019905]	actin filament [GO:0005884];AP-3 adaptor complex [GO:0030123];autophagosome [GO:0005776];clathrin-coated vesicle [GO:0030136];CORVET complex [GO:0033263];early endosome [GO:0005769];HOPS complex [GO:0030897];late endosome [GO:0005770];late endosome membrane [GO:0031902];lysosomal membrane [GO:0005765];lysosome [GO:0005764]	GO:0005764;GO:0005765;GO:0005769;GO:0005770;GO:0005776;GO:0005884;GO:0006886;GO:0006904;GO:0006914;GO:0007032;GO:0007040;GO:0008333;GO:0019905;GO:0030123;GO:0030136;GO:0030674;GO:0030897;GO:0031902;GO:0033263;GO:0035542;GO:0046718;GO:0046872
20.9441	21.1837	21.1663	21.9857	21.3124	20.7207	21.4434	21.5789	21.4877	19.0876	19.7492	19.739		NaN	NaN	0.241582	+	2.74545	-2.27717	-1.97805	O60318	O60318	Germinal-center associated nuclear protein	MCM3AP		2.3.1.-		DNA replication [GO:0006260];immune system process [GO:0002376];mRNA transport [GO:0051028];protein import into nucleus [GO:0006606]	DNA binding [GO:0003677];nucleotide binding [GO:0000166];transferase activity, transferring acyl groups [GO:0016746]	cytoplasm [GO:0005737];cytosol [GO:0005829];nuclear membrane [GO:0031965];nuclear pore [GO:0005643];nucleoplasm [GO:0005654];nucleus [GO:0005634]	GO:0000166;GO:0002376;GO:0003677;GO:0005634;GO:0005643;GO:0005654;GO:0005737;GO:0005829;GO:0006260;GO:0006606;GO:0016746;GO:0031965;GO:0051028
22.0428	20.2729	20.6563	20.6474	20.9582	20.4592	21.9265	21.7621	21.4155	19.3424	20.392	19.4529		NaN	NaN	-0.302413	+	2.28941	-1.89109	-1.97229	B7Z6D5;Q96GQ7;A0A087WYH5;A0A087X059	B7Z6D5;Q96GQ7	Probable ATP-dependent RNA helicase DDX27	DDX27	CATALYTIC ACTIVITY: ATP + H(2)O = ADP + phosphate.	3.6.4.13		RNA secondary structure unwinding [GO:0010501];rRNA processing [GO:0006364]	ATP binding [GO:0005524];ATP-dependent RNA helicase activity [GO:0004004];poly(A) RNA binding [GO:0044822];ATP binding [GO:0005524];helicase activity [GO:0004386];nucleic acid binding [GO:0003676];ATP binding [GO:0005524];nucleic acid binding [GO:0003676]	chromosome [GO:0005694];nucleolus [GO:0005730]	GO:0004004;GO:0005524;GO:0005694;GO:0005730;GO:0006364;GO:0010501;GO:0044822;GO:0003676;GO:0004386;GO:0005524;GO:0003676;GO:0005524
21.7372	22.2446	22.8506	20.7101	22.0348	19.1559	22.1116	21.551	21.6114	19.264	19.8013	20.3115		0.928164	-0.969798	-1.64386	+	2.02429	-2.09561	-1.96571	E9PM69;R4GNH3;P17980;E9PMD8;E9PKD5;E9PN50;E9PLG2	E9PM69;R4GNH3;P17980;E9PMD8;E9PKD5;E9PN50	26S protease regulatory subunit 6A	PSMC3				anaphase-promoting complex-dependent catabolic process [GO:0031145];antigen processing and presentation of exogenous peptide antigen via MHC class I, TAP-dependent [GO:0002479];blastocyst development [GO:0001824];ER-associated ubiquitin-dependent protein catabolic process [GO:0030433];Fc-epsilon receptor signaling pathway [GO:0038095];MAPK cascade [GO:0000165];negative regulation of canonical Wnt…	ATPase activity [GO:0016887];ATP binding [GO:0005524];identical protein binding [GO:0042802];proteasome-activating ATPase activity [GO:0036402];TBP-class protein binding [GO:0017025];transcription coactivator activity [GO:0003713];transcription corepressor activity [GO:0003714];ATP binding [GO:0005524];hydrolase activity [GO:0016787];ATP binding [GO:0005524];ATP binding [GO:0005524];ATP binding […	cytoplasmic mRNA processing body [GO:0000932];cytosol [GO:0005829];cytosolic proteasome complex [GO:0031597];membrane [GO:0016020];nuclear proteasome complex [GO:0031595];nucleoplasm [GO:0005654];nucleus [GO:0005634];proteasome accessory complex [GO:0022624];proteasome complex [GO:0000502];proteasome regulatory particle, base subcomplex [GO:0008540];cytoplasm [GO:0005737];cytoplasm [GO:0005737]	GO:0000165;GO:0000209;GO:0000502;GO:0000932;GO:0001824;GO:0002223;GO:0002479;GO:0003713;GO:0003714;GO:0005524;GO:0005634;GO:0005654;GO:0005829;GO:0006521;GO:0008540;GO:0016020;GO:0016032;GO:0016887;GO:0017025;GO:0022624;GO:0030433;GO:0031145;GO:0031595;GO:0031597;GO:0033209;GO:0036402;GO:0038061;GO:0038095;GO:0042802;GO:0043161;GO:0043488;GO:0045899;GO:0050852;GO:0051436;GO:0051437;GO:0060071;GO:…
21.5501	20.9081	22.2554	20.625	19.8922	20.6544	21.7314	21.9721	21.7328	19.2684	20.0581	20.2659		NaN	NaN	-1.18064	+	3.59899	-2.05007	-1.94796	P29218;E5RIP7;H0YBL1;E5RG13;E5RG94;E5RHE9;E5RI82;E5RGY4;E5RIF4	P29218;E5RIP7;H0YBL1;E5RG13	Inositol monophosphatase 1	IMPA1	CATALYTIC ACTIVITY: Myo-inositol phosphate + H(2)O = myo-inositol + phosphate. {ECO:0000269|PubMed:1377913, ECO:0000269|PubMed:8068620, ECO:0000269|PubMed:8718889, ECO:0000269|PubMed:9462881}.;CATALYTIC ACTIVITY: Alpha-D-galactose 1-phosphate + H(2)O = D-galactose + phosphate. {ECO:0000269|PubMed:9462881}.	3.1.3.25;3.1.3.94		inositol biosynthetic process [GO:0006021];inositol metabolic process [GO:0006020];inositol phosphate dephosphorylation [GO:0046855];inositol phosphate metabolic process [GO:0043647];phosphate-containing compound metabolic process [GO:0006796];phosphatidylinositol biosynthetic process [GO:0006661];phosphatidylinositol phosphorylation [GO:0046854];signal transduction [GO:0007165];phosphatidylinosi…	identical protein binding [GO:0042802];inositol monophosphate 1-phosphatase activity [GO:0008934];inositol monophosphate 3-phosphatase activity [GO:0052832];inositol monophosphate 4-phosphatase activity [GO:0052833];inositol monophosphate phosphatase activity [GO:0052834];lithium ion binding [GO:0031403];magnesium ion binding [GO:0000287];manganese ion binding [GO:0030145];protein homodimerizatio…	cytoplasm [GO:0005737];cytosol [GO:0005829];extracellular exosome [GO:0070062]	GO:0000287;GO:0005737;GO:0005829;GO:0006020;GO:0006021;GO:0006661;GO:0006796;GO:0007165;GO:0008934;GO:0030145;GO:0031403;GO:0042802;GO:0042803;GO:0043647;GO:0046854;GO:0046855;GO:0052832;GO:0052833;GO:0052834;GO:0070062;GO:0046854;GO:0046854;GO:0046854;GO:0008934;GO:0046854;GO:0046855;GO:0046854;GO:0008934;GO:0046854;GO:0046855;GO:0046854;GO:0008934;GO:0046854;GO:0046855
20.1406	21.6113	19.9755	21.0869	20.086	20.6851	21.7549	21.8615	21.722	20.2844	19.7075	19.5076		NaN	NaN	0.043513	+	2.32227	-1.90934	-1.94631	P61160;F5H6T1	P61160;F5H6T1	Actin-related protein 2	ACTR2				Arp2/3 complex-mediated actin nucleation [GO:0034314];asymmetric cell division [GO:0008356];cilium assembly [GO:0060271];cytosolic transport [GO:0016482];ephrin receptor signaling pathway [GO:0048013];establishment or maintenance of cell polarity [GO:0007163];Fc-gamma receptor signaling pathway involved in phagocytosis [GO:0038096];meiotic chromosome movement towards spindle pole [GO:0016344];mei…	ATP binding [GO:0005524];structural constituent of cytoskeleton [GO:0005200];ATP binding [GO:0005524]	actin cap [GO:0030478];actin cytoskeleton [GO:0015629];Arp2/3 protein complex [GO:0005885];cell projection [GO:0042995];cytoplasm [GO:0005737];cytosol [GO:0005829];extracellular exosome [GO:0070062];focal adhesion [GO:0005925];membrane [GO:0016020];Arp2/3 protein complex [GO:0005885]	GO:0005200;GO:0005524;GO:0005737;GO:0005829;GO:0005885;GO:0005925;GO:0006928;GO:0007163;GO:0008356;GO:0015629;GO:0016020;GO:0016344;GO:0016482;GO:0030478;GO:0033206;GO:0034314;GO:0038096;GO:0042995;GO:0048013;GO:0051653;GO:0060271;GO:0070062;GO:0005524;GO:0005885;GO:0034314
21.9933	22.0859	22.1421	21.8817	22.1625	21.9726	22.0298	22.0816	22.0827	19.8534	20.1455	20.4682		0.295875	-0.0681655	-0.0681655	+	2.55195	-2.37644	-1.90901	O75439;G3V0E4;F8WAZ6;F8WEA6;F8WBE1	O75439;G3V0E4;F8WAZ6	Mitochondrial-processing peptidase subunit beta	PMPCB	CATALYTIC ACTIVITY: Release of N-terminal transit peptides from precursor proteins imported into the mitochondrion, typically with Arg in position P2.	3.4.24.64	ACT_SITE 104 104 Proton acceptor. {ECO:0000255|PROSITE-ProRule:PRU10096}.	aerobic respiration [GO:0009060];mitochondrial electron transport, ubiquinol to cytochrome c [GO:0006122];protein processing [GO:0016485]	metalloendopeptidase activity [GO:0004222];zinc ion binding [GO:0008270];metal ion binding [GO:0046872];metalloendopeptidase activity [GO:0004222];catalytic activity [GO:0003824];metal ion binding [GO:0046872];catalytic activity [GO:0003824];metal ion binding [GO:0046872];metal ion binding [GO:0046872];metalloendopeptidase activity [GO:0004222]	mitochondrial matrix [GO:0005759];mitochondrial respiratory chain complex III [GO:0005750]	GO:0004222;GO:0005750;GO:0005759;GO:0006122;GO:0008270;GO:0009060;GO:0016485;GO:0004222;GO:0046872;GO:0003824;GO:0046872;GO:0003824;GO:0046872;GO:0004222;GO:0046872
20.9293	20.834	20.7876	21.8382	22.2052	20.4146	21.8552	21.6826	21.3018	19.7586	19.7031	19.8243		NaN	NaN	0.635693	+	2.55095	-1.77974	-1.85118	O96019;H7C5S0;C9JQT2;O94805	O96019;H7C5S0	Actin-like protein 6A	ACTL6A				ATP-dependent chromatin remodeling [GO:0043044];chromatin remodeling [GO:0006338];DNA recombination [GO:0006310];DNA repair [GO:0006281];histone H2A acetylation [GO:0043968];histone H4 acetylation [GO:0043967];neural retina development [GO:0003407];positive regulation of protein targeting to mitochondrion [GO:1903955];regulation of growth [GO:0040008];regulation of mitophagy [GO:1903146];regulati…	chromatin binding [GO:0003682];transcription coactivator activity [GO:0003713];structural constituent of cytoskeleton [GO:0005200];transcription coactivator activity [GO:0003713]	Ino80 complex [GO:0031011];npBAF complex [GO:0071564];NuA4 histone acetyltransferase complex [GO:0035267];nuclear chromatin [GO:0000790];nucleoplasm [GO:0005654];nucleus [GO:0005634];plasma membrane [GO:0005886];protein complex [GO:0043234];SWI/SNF complex [GO:0016514];nBAF complex [GO:0071565];nucleolus [GO:0005730];nucleus [GO:0005634];SWI/SNF complex [GO:0016514];npBAF complex [GO:0071564];npB…	GO:0000790;GO:0003407;GO:0003682;GO:0003713;GO:0005634;GO:0005654;GO:0005886;GO:0006281;GO:0006310;GO:0006338;GO:0006351;GO:0006357;GO:0007165;GO:0016514;GO:0021510;GO:0031011;GO:0035267;GO:0040008;GO:0043044;GO:0043234;GO:0043967;GO:0043968;GO:0071564;GO:1903146;GO:1903955;GO:0003713;GO:0005200;GO:0005634;GO:0005730;GO:0006325;GO:0006338;GO:0006351;GO:0006357;GO:0016514;GO:0016569;GO:0021510;GO:…
20.924	20.9846	20.771	21.5893	20.9652	20.1872	21.6518	21.6834	21.659	20.252	20.3853	18.8799		NaN	NaN	0.0207157	+	2.8271	-1.59455	-1.82567	P11216;H0Y4Z6;E9PK47;P06737	P11216	Glycogen phosphorylase, brain form	PYGB	CATALYTIC ACTIVITY: ((1->4)-alpha-D-glucosyl)(n) + phosphate = ((1->4)-alpha-D-glucosyl)(n-1) + alpha-D-glucose 1-phosphate.;CATALYTIC ACTIVITY: ((1->4)-alpha-D-glucosyl)(n) + phosphate = ((1->4)-alpha-D-glucosyl)(n-1) + alpha-D-glucose 1-phosphate.;CATALYTIC ACTIVITY: ((1->4)-alpha-D-glucosyl)(n) + phosphate = ((1->4)-alpha-D-glucosyl)(n-1) + alpha-D-glucose 1-phosphate. {ECO:0000256|RuleBase:RU…	2.4.1.1;2.4.1.1;2.4.1.1;2.4.1.1		5-phosphoribose 1-diphosphate biosynthetic process [GO:0006015];glucose homeostasis [GO:0042593];glycogen catabolic process [GO:0005980];glycogen metabolic process [GO:0005977];necroptotic process [GO:0070266];glycogen catabolic process [GO:0005980];carbohydrate metabolic process [GO:0005975];carbohydrate metabolic process [GO:0005975]	AMP binding [GO:0016208];ATP binding [GO:0005524];bile acid binding [GO:0032052];drug binding [GO:0008144];glucose binding [GO:0005536];glycogen phosphorylase activity [GO:0008184];protein homodimerization activity [GO:0042803];purine nucleobase binding [GO:0002060];pyridoxal phosphate binding [GO:0030170];vitamin binding [GO:0019842];glycogen phosphorylase activity [GO:0008184];pyridoxal phospha…	cytoplasm [GO:0005737];cytosol [GO:0005829];extracellular exosome [GO:0070062];plasma membrane [GO:0005886];cytoplasm [GO:0005737];extracellular exosome [GO:0070062];membrane [GO:0016020];cytoplasm [GO:0005737];plasma membrane [GO:0005886]	GO:0002060;GO:0005524;GO:0005536;GO:0005737;GO:0005829;GO:0005886;GO:0005977;GO:0005980;GO:0006015;GO:0008144;GO:0008184;GO:0016208;GO:0019842;GO:0030170;GO:0032052;GO:0042593;GO:0042803;GO:0070062;GO:0070266;GO:0005737;GO:0005980;GO:0008184;GO:0016020;GO:0030170;GO:0070062;GO:0005737;GO:0005886;GO:0005975;GO:0008184;GO:0030170;GO:0005975;GO:0008184
20.4952	21.9025	20.1416	21.0277	19.5248	20.7978	21.2558	21.2612	21.2088	20.139	18.5554	19.6159		NaN	NaN	-0.396338	+	2.37481	-1.65496	-1.80518	Q3LIE7;Q15392;H7C4B7	Q3LIE7;Q15392;H7C4B7	Delta(24)-sterol reductase	Nbla03646;DHCR24	CATALYTIC ACTIVITY: 5-alpha-cholest-7-en-3-beta-ol + NADP(+) = 5-alpha-cholesta-7,24-dien-3-beta-ol + NADPH.	1.3.1.72		amyloid precursor protein catabolic process [GO:0042987];apoptotic process [GO:0006915];cell cycle arrest [GO:0007050];cholesterol biosynthetic process [GO:0006695];cholesterol biosynthetic process via desmosterol [GO:0033489];cholesterol biosynthetic process via lathosterol [GO:0033490];male genitalia development [GO:0030539];membrane organization [GO:0061024];negative regulation of apoptotic pr…	delta24(24-1) sterol reductase activity [GO:0000246];delta24-sterol reductase activity [GO:0050614];enzyme binding [GO:0019899];flavin adenine dinucleotide binding [GO:0050660];oxidoreductase activity, acting on CH-OH group of donors [GO:0016614];oxidoreductase activity, acting on the CH-CH group of donors, NAD or NADP as acceptor [GO:0016628];peptide antigen binding [GO:0042605];flavin adenine d…	cytoskeleton [GO:0005856];cytosol [GO:0005829];endoplasmic reticulum [GO:0005783];endoplasmic reticulum membrane [GO:0005789];Golgi membrane [GO:0000139];integral component of membrane [GO:0016021];membrane [GO:0016020];nucleus [GO:0005634]	GO:0000139;GO:0000246;GO:0005634;GO:0005783;GO:0005789;GO:0005829;GO:0005856;GO:0006695;GO:0006915;GO:0006979;GO:0007050;GO:0007265;GO:0008104;GO:0008285;GO:0009725;GO:0009888;GO:0016020;GO:0016021;GO:0016614;GO:0016628;GO:0019899;GO:0030539;GO:0031639;GO:0033489;GO:0033490;GO:0042605;GO:0042987;GO:0043066;GO:0043154;GO:0043588;GO:0050614;GO:0050660;GO:0055114;GO:0061024;GO:1901214;GO:0016614;GO:…
20.4714	21.2149	21.0153	21.8594	22.3805	22.5341	21.4831	22.0668	21.881	20.8041	18.99	20.2758		1.92578	1.54546	1.3575	+	3.03569	-2.44031	-1.787	Q6PKG0;A0A0B4J210;E5RH50;H0YC33;H0YBW1;Q659C4;E5RHK4;H0YAN4;H0YC73	Q6PKG0;A0A0B4J210;E5RH50	La-related protein 1	LARP1				cell proliferation [GO:0008283];positive regulation of macroautophagy [GO:0016239];positive regulation of viral genome replication [GO:0045070];TOR signaling [GO:0031929];translational initiation [GO:0006413]	cadherin binding involved in cell-cell adhesion [GO:0098641];eukaryotic initiation factor 4E binding [GO:0008190];mRNA 3'-UTR binding [GO:0003730];mRNA 5'-UTR binding [GO:0048027];poly(A) RNA binding [GO:0044822];RNA cap binding [GO:0000339];translation activator activity [GO:0008494];translation initiation factor binding [GO:0031369];poly(A) RNA binding [GO:0044822]	cell-cell adherens junction [GO:0005913];cytoplasm [GO:0005737];membrane [GO:0016020];nucleoplasm [GO:0005654];nucleus [GO:0005634]	GO:0000339;GO:0003730;GO:0005654;GO:0005737;GO:0005913;GO:0006413;GO:0008190;GO:0008283;GO:0008494;GO:0016020;GO:0016239;GO:0031369;GO:0031929;GO:0044822;GO:0045070;GO:0048027;GO:0098641;GO:0005634;GO:0044822
20.266	21.2356	20.5854	20.6361	19.9193	20.7547	21.9006	21.8692	22.0472	21.0442	19.8401	19.929		NaN	NaN	-0.258956	+	4.36077	-2.28303	-1.66789	P21399	P21399	Cytoplasmic aconitate hydratase	ACO1	CATALYTIC ACTIVITY: Citrate = isocitrate.	4.2.1.3		cellular iron ion homeostasis [GO:0006879];citrate metabolic process [GO:0006101];intestinal absorption [GO:0050892];post-embryonic development [GO:0009791];regulation of translation [GO:0006417];response to iron(II) ion [GO:0010040];tricarboxylic acid cycle [GO:0006099]	4 iron, 4 sulfur cluster binding [GO:0051539];aconitate hydratase activity [GO:0003994];iron-responsive element binding [GO:0030350];metal ion binding [GO:0046872];RNA binding [GO:0003723]	cytoplasm [GO:0005737];cytosol [GO:0005829];endoplasmic reticulum [GO:0005783];extracellular exosome [GO:0070062];Golgi apparatus [GO:0005794];mitochondrion [GO:0005739]	GO:0003723;GO:0003994;GO:0005737;GO:0005739;GO:0005783;GO:0005794;GO:0005829;GO:0006099;GO:0006101;GO:0006417;GO:0006879;GO:0009791;GO:0010040;GO:0030350;GO:0046872;GO:0050892;GO:0051539;GO:0070062
20.5231	20.3963	20.9455	20.8451	20.9235	20.7838	20.9761	21.1817	21.2512	19.546	20.0922	18.8787		NaN	NaN	0.229185	+	2.74388	-1.50619	-1.63073	O94822;H7BYG8;S4R3T2	O94822	E3 ubiquitin-protein ligase listerin	LTN1	CATALYTIC ACTIVITY: S-ubiquitinyl-[E2 ubiquitin-conjugating enzyme]-L-cysteine + [acceptor protein]-L-lysine = [E2 ubiquitin-conjugating enzyme]-L-cysteine + N(6)-ubiquitinyl-[acceptor protein]-L-lysine.	2.3.2.27		protein autoubiquitination [GO:0051865]	ligase activity [GO:0016874];ubiquitin protein ligase activity [GO:0061630];zinc ion binding [GO:0008270]		GO:0008270;GO:0016874;GO:0051865;GO:0061630
21.1287	21.1009	20.8281	20.9414	20.4181	21.4148	20.8378	20.9978	20.9175	19.1696	19.3785	19.3996		NaN	NaN	-0.0944627	+	3.8766	-1.3366	-1.6018	H3BNC0;Q9NVM4;H3BPZ8;H3BSS9	H3BNC0;Q9NVM4;H3BPZ8	Protein arginine N-methyltransferase 7	PRMT7	CATALYTIC ACTIVITY: S-adenosyl-L-methionine + [protein]-L-arginine = S-adenosyl-L-homocysteine + [protein]-N(omega)-methyl-L-arginine. {ECO:0000269|PubMed:25294873}.	2.1.1.321	ACT_SITE 144 144 {ECO:0000250}.;ACT_SITE 153 153 {ECO:0000250}.	cell differentiation [GO:0030154];DNA methylation involved in gamete generation [GO:0043046];histone arginine methylation [GO:0034969];histone methylation [GO:0016571];peptidyl-arginine methylation [GO:0018216];regulation of gene expression by genetic imprinting [GO:0006349];regulation of protein binding [GO:0043393];regulation of transcription, DNA-templated [GO:0006355];spliceosomal snRNP assem…	[myelin basic protein]-arginine N-methyltransferase activity [GO:0016277];histone-arginine N-methyltransferase activity [GO:0008469];histone binding [GO:0042393];histone methyltransferase activity (H4-R3 specific) [GO:0044020];protein-arginine N-methyltransferase activity [GO:0016274];protein-arginine omega-N asymmetric methyltransferase activity [GO:0035242];protein-arginine omega-N monomethyltr…	cytosol [GO:0005829];nucleolus [GO:0005730];nucleoplasm [GO:0005654];nucleus [GO:0005634]	GO:0000387;GO:0005634;GO:0005654;GO:0005730;GO:0005829;GO:0006349;GO:0006351;GO:0006355;GO:0008469;GO:0008757;GO:0016274;GO:0016277;GO:0016571;GO:0018216;GO:0030154;GO:0034969;GO:0035241;GO:0035242;GO:0035243;GO:0042393;GO:0043021;GO:0043046;GO:0043393;GO:0044020;GO:0006479;GO:0008168;GO:0006479;GO:0008168;GO:0006479;GO:0008168
20.5425	21.1229	20.2118	21.7348	20.5158	21.0919	21.1689	21.1867	21.0124	19.5232	19.5934	20.225		NaN	NaN	0.488408	+	4.07098	-1.27243	-1.34213	O95487	O95487	Protein transport protein Sec24B	SEC24B				antigen processing and presentation of exogenous peptide antigen via MHC class II [GO:0019886];antigen processing and presentation of peptide antigen via MHC class I [GO:0002474];aorta morphogenesis [GO:0035909];auditory receptor cell stereocilium organization [GO:0060088];cochlear nucleus development [GO:0021747];COPII vesicle coating [GO:0048208];coronary artery morphogenesis [GO:0060982];ER to…	transporter activity [GO:0005215];zinc ion binding [GO:0008270]	COPII vesicle coat [GO:0030127];cytosol [GO:0005829];endoplasmic reticulum membrane [GO:0005789];ER to Golgi transport vesicle membrane [GO:0012507];Golgi membrane [GO:0000139];membrane [GO:0016020];perinuclear region of cytoplasm [GO:0048471]	GO:0000139;GO:0001843;GO:0002474;GO:0003151;GO:0005215;GO:0005789;GO:0005829;GO:0006886;GO:0006888;GO:0008270;GO:0012507;GO:0016020;GO:0016192;GO:0019886;GO:0021747;GO:0030127;GO:0035909;GO:0048208;GO:0048471;GO:0060088;GO:0060463;GO:0060982;GO:0061156;GO:0090178;GO:1901301
21.246	21.1696	20.6135	20.852	20.8051	20.6736	21.087	21.5113	21.2013	20.0698	20.0949	19.7186		NaN	NaN	-0.232791	+	2.45329	-1.79479	-1.30544	A0A087WWU8;Q5HYB6;D6R904;Q5VU61;D6RFM2;H0YL80;K7EP68;H0YKX5;H0YKP3;H0YNC7;F5H7S3;H7BYY1;H0YK48;H0YL52;B7Z596;Q5TCU3;CON__Q3SX28;Q5TCU8;Q6ZN40;P09493;P07951	A0A087WWU8;Q5HYB6;D6R904;Q5VU61		TPM3;DKFZp686J1372				actin filament organization [GO:0007015];muscle contraction [GO:0006936];muscle filament sliding [GO:0030049];regulation of ATPase activity [GO:0043462];actin filament organization [GO:0007015];cardiac muscle contraction [GO:0060048];cellular response to reactive oxygen species [GO:0034614];cytoskeleton organization [GO:0007010];in utero embryonic development [GO:0001701];movement of cell or subc…	actin binding [GO:0003779];actin filament binding [GO:0051015];structural constituent of muscle [GO:0008307];actin binding [GO:0003779];actin filament binding [GO:0051015];cytoskeletal protein binding [GO:0008092];structural constituent of cytoskeleton [GO:0005200];structural constituent of muscle [GO:0008307]	actin filament [GO:0005884];cytosol [GO:0005829];muscle thin filament tropomyosin [GO:0005862];actin filament [GO:0005884];bleb [GO:0032059];cytoskeleton [GO:0005856];cytosol [GO:0005829];filamentous actin [GO:0031941];muscle thin filament tropomyosin [GO:0005862];ruffle membrane [GO:0032587];sarcomere [GO:0030017];stress fiber [GO:0001725];integral component of membrane [GO:0016021]	GO:0003779;GO:0005829;GO:0005862;GO:0005884;GO:0006936;GO:0007015;GO:0008307;GO:0030049;GO:0043462;GO:0051015;GO:0001701;GO:0001725;GO:0003065;GO:0003779;GO:0005200;GO:0005829;GO:0005856;GO:0005862;GO:0005884;GO:0006928;GO:0006936;GO:0006937;GO:0007010;GO:0007015;GO:0008016;GO:0008092;GO:0008307;GO:0008360;GO:0030017;GO:0030049;GO:0030336;GO:0031529;GO:0031941;GO:0032059;GO:0032587;GO:0032781;GO:…
21.1081	21.5566	20.6217	20.7167	19.669	20.0501	21.3067	21.5937	21.3057	20.7949	20.7635	19.2824		NaN	NaN	-0.950225	+	2.69882	-1.65503	-1.12177	O75489;E9PS48	O75489	NADH dehydrogenase [ubiquinone] iron-sulfur protein 3, mitochondrial	NDUFS3	CATALYTIC ACTIVITY: NADH + ubiquinone + 5 H(+)(In) = NAD(+) + ubiquinol + 4 H(+)(Out).;CATALYTIC ACTIVITY: NADH + acceptor = NAD(+) + reduced acceptor.	1.6.5.3;1.6.99.3		mitochondrial electron transport, NADH to ubiquinone [GO:0006120];mitochondrial respiratory chain complex I assembly [GO:0032981];negative regulation of cell growth [GO:0030308];negative regulation of intrinsic apoptotic signaling pathway [GO:2001243];reactive oxygen species metabolic process [GO:0072593];substantia nigra development [GO:0021762]	electron carrier activity [GO:0009055];NADH dehydrogenase (ubiquinone) activity [GO:0008137];NADH dehydrogenase activity [GO:0003954];NADH dehydrogenase (ubiquinone) activity [GO:0008137]	mitochondrial matrix [GO:0005759];mitochondrial membrane [GO:0031966];mitochondrial respiratory chain complex I [GO:0005747];mitochondrion [GO:0005739];myelin sheath [GO:0043209];nucleus [GO:0005634]	GO:0003954;GO:0005634;GO:0005739;GO:0005747;GO:0005759;GO:0006120;GO:0008137;GO:0009055;GO:0021762;GO:0030308;GO:0031966;GO:0032981;GO:0043209;GO:0072593;GO:2001243;GO:0008137
20.9581	21.1946	20.3993	21.5531	19.9205	21.5516	20.9203	21.0568	20.8139	20.4191	20.108	20.0152		NaN	NaN	0.157759	+	2.75296	-1.73125	-0.749553	Q99615;K7EPP7;K7ESP1;K7EIH8;K7EJE9;K7EK03;K7EJL5;K7EN19;K7EJV7;K7ER44;K7ELJ8	Q99615;K7EPP7;K7ESP1;K7EIH8	DnaJ homolog subfamily C member 7	DNAJC7				chaperone cofactor-dependent protein refolding [GO:0070389];protein folding [GO:0006457];regulation of cellular response to heat [GO:1900034]	ATPase activator activity [GO:0001671];heat shock protein binding [GO:0031072]	cytoplasm [GO:0005737];cytoskeleton [GO:0005856];cytosol [GO:0005829];extracellular exosome [GO:0070062];membrane [GO:0016020];nucleoplasm [GO:0005654];cytoplasm [GO:0005737];nucleoplasm [GO:0005654];cytoplasm [GO:0005737];nucleoplasm [GO:0005654];cytoplasm [GO:0005737];nucleoplasm [GO:0005654];cytoplasm [GO:0005737];nucleoplasm [GO:0005654];cytoplasm [GO:0005737];nucleoplasm [GO:0005654];cytopla…	GO:0001671;GO:0005654;GO:0005737;GO:0005829;GO:0005856;GO:0006457;GO:0016020;GO:0031072;GO:0070062;GO:0070389;GO:1900034;GO:0005654;GO:0005737;GO:0005654;GO:0005737;GO:0005654;GO:0005737;GO:0005654;GO:0005737;GO:0005654;GO:0005737;GO:0005654;GO:0005737;GO:0005654;GO:0005737
19.9747	20.6076	21.1486	21.5143	20.5305	19.6522	20.8156	20.3394	19.788	21.5837	21.3285	21.3672		NaN	NaN	-0.0112801	+	3.53775	1.30573	1.11214	H0Y512;Q9HDC9	H0Y512;Q9HDC9	Adipocyte plasma membrane-associated protein	APMAP				biosynthetic process [GO:0009058];biosynthetic process [GO:0009058]	arylesterase activity [GO:0004064];strictosidine synthase activity [GO:0016844];strictosidine synthase activity [GO:0016844]	cell surface [GO:0009986];endoplasmic reticulum [GO:0005783];extracellular exosome [GO:0070062];integral component of membrane [GO:0016021];membrane [GO:0016020];integral component of membrane [GO:0016021]	GO:0004064;GO:0005783;GO:0009058;GO:0009986;GO:0016020;GO:0016021;GO:0016844;GO:0070062;GO:0009058;GO:0016021;GO:0016844
24.6205	24.1231	24.9503	25.9856	25.8411	25.53	25.6621	25.5913	25.5559	26.7433	26.7278	26.7799		1.94312	1.22093	1.22093	+	5.29667	1.14727	1.14723	Q9Y277;E5RJN6;E5RHZ6;E5RHE1;E5RFP6;E5RK27;E5RFL1	Q9Y277;E5RJN6;E5RHZ6	Voltage-dependent anion-selective channel protein 3	VDAC3				adenine transport [GO:0015853];regulation of cilium assembly [GO:1902017];regulation of cilium assembly [GO:1902017];regulation of cilium assembly [GO:1902017];regulation of cilium assembly [GO:1902017];regulation of cilium assembly [GO:1902017];regulation of cilium assembly [GO:1902017];regulation of cilium assembly [GO:1902017]	nucleotide binding [GO:0000166];porin activity [GO:0015288];voltage-gated anion channel activity [GO:0008308];voltage-gated anion channel activity [GO:0008308];voltage-gated anion channel activity [GO:0008308];voltage-gated anion channel activity [GO:0008308];voltage-gated anion channel activity [GO:0008308];voltage-gated anion channel activity [GO:0008308];voltage-gated anion channel activity [G…	extracellular exosome [GO:0070062];mitochondrial outer membrane [GO:0005741];mitochondrion [GO:0005739];nucleus [GO:0005634];pore complex [GO:0046930];mitochondrial outer membrane [GO:0005741];mitochondrial outer membrane [GO:0005741];mitochondrion [GO:0005739];mitochondrial outer membrane [GO:0005741];mitochondrial outer membrane [GO:0005741];mitochondrial outer membrane [GO:0005741];mitochondri…	GO:0000166;GO:0005634;GO:0005739;GO:0005741;GO:0008308;GO:0015288;GO:0015853;GO:0046930;GO:0070062;GO:1902017;GO:0005741;GO:0008308;GO:1902017;GO:0005739;GO:0005741;GO:0008308;GO:1902017;GO:0005741;GO:0008308;GO:1902017;GO:0005741;GO:0008308;GO:1902017;GO:0005741;GO:0008308;GO:1902017;GO:0005739;GO:0005741;GO:0008308;GO:1902017
19.8355	21.1123	19.6448	20.7608	20.8235	21.066	19.7725	19.2219	19.6112	20.9019	20.6894	20.8143		NaN	NaN	0.685914	+	4.0541	1.24479	1.2667	P62316;K7EJB5;K7ERG4	P62316	Small nuclear ribonucleoprotein Sm D2	SNRPD2				mRNA splicing, via spliceosome [GO:0000398];nuclear import [GO:0051170];RNA splicing [GO:0008380];spliceosomal complex assembly [GO:0000245];spliceosomal snRNP assembly [GO:0000387];RNA splicing [GO:0008380];RNA splicing [GO:0008380]	poly(A) RNA binding [GO:0044822];U1 snRNP binding [GO:1990446]	catalytic step 2 spliceosome [GO:0071013];cytosol [GO:0005829];extracellular exosome [GO:0070062];methylosome [GO:0034709];nucleoplasm [GO:0005654];pICln-Sm protein complex [GO:0034715];precatalytic spliceosome [GO:0071011];small nuclear ribonucleoprotein complex [GO:0030532];SMN-Sm protein complex [GO:0034719];spliceosomal complex [GO:0005681];U12-type spliceosomal complex [GO:0005689];U1 snRNP …	GO:0000245;GO:0000387;GO:0000398;GO:0005654;GO:0005681;GO:0005682;GO:0005685;GO:0005686;GO:0005687;GO:0005689;GO:0005829;GO:0008380;GO:0030532;GO:0034709;GO:0034715;GO:0034719;GO:0044822;GO:0046540;GO:0051170;GO:0070062;GO:0071011;GO:0071013;GO:1990446;GO:0008380;GO:0030532;GO:0008380;GO:0030532
20.9928	20.8926	20.7606	20.8504	20.6743	19.5491	20.244	19.3377	19.7422	21.2177	20.9626	21.023		NaN	NaN	-0.524086	+	2.64893	2.37514	1.29312	Q92636	Q92636	Protein FAN	NSMAF				ceramide metabolic process [GO:0006672];positive regulation of apoptotic process [GO:0043065];positive regulation of ceramide biosynthetic process [GO:2000304];signal transduction [GO:0007165]	phospholipid binding [GO:0005543];signal transducer activity, downstream of receptor [GO:0005057];sphingomyelin phosphodiesterase activator activity [GO:0016230]	cytoplasm [GO:0005737];cytosol [GO:0005829];endomembrane system [GO:0012505];extrinsic component of membrane [GO:0019898]	GO:0005057;GO:0005543;GO:0005737;GO:0005829;GO:0006672;GO:0007165;GO:0012505;GO:0016230;GO:0019898;GO:0043065;GO:2000304
20.2897	20.9724	20.4122	21.5664	20.1629	21.5522	22.5007	22.5574	22.478	23.8374	23.8245	23.7876		NaN	NaN	0.535746	+	5.90056	1.30447	1.30447	P22830;K7ELX4;K7EJX5;K7EKP7	P22830;K7ELX4	Ferrochelatase, mitochondrial	FECH	CATALYTIC ACTIVITY: Protoheme + 2 H(+) = protoporphyrin + Fe(2+).;CATALYTIC ACTIVITY: Protoheme + 2 H(+) = protoporphyrin + Fe(2+). {ECO:0000256|RuleBase:RU000607}.	4.99.1.1;4.99.1.1	ACT_SITE 230 230;ACT_SITE 383 383	cellular response to dexamethasone stimulus [GO:0071549];generation of precursor metabolites and energy [GO:0006091];heme biosynthetic process [GO:0006783];protoporphyrinogen IX metabolic process [GO:0046501];response to arsenic-containing substance [GO:0046685];response to drug [GO:0042493];response to ethanol [GO:0045471];response to insecticide [GO:0017085];response to lead ion [GO:0010288];re…	2 iron, 2 sulfur cluster binding [GO:0051537];ferrochelatase activity [GO:0004325];ferrous iron binding [GO:0008198];ferrochelatase activity [GO:0004325];ferrochelatase activity [GO:0004325];ferrochelatase activity [GO:0004325]	mitochondrial inner membrane [GO:0005743];mitochondrial matrix [GO:0005759];mitochondrion [GO:0005739]	GO:0004325;GO:0005739;GO:0005743;GO:0005759;GO:0006091;GO:0006783;GO:0008198;GO:0009416;GO:0010288;GO:0017085;GO:0042493;GO:0045471;GO:0046501;GO:0046685;GO:0051537;GO:0051597;GO:0070541;GO:0071549;GO:0004325;GO:0006783;GO:0004325;GO:0006783;GO:0004325;GO:0006783
20.8521	20.6388	20.4038	20.3397	21.0542	20.6787	20.5386	20.1864	19.351	21.2909	21.4761	21.2478		NaN	NaN	0.0592829	+	2.00356	2.02299	1.31296	Q13523;H0YDJ3	Q13523;H0YDJ3	Serine/threonine-protein kinase PRP4 homolog	PRPF4B	CATALYTIC ACTIVITY: ATP + a protein = ADP + a phosphoprotein.	2.7.11.1	ACT_SITE 815 815 Proton acceptor. {ECO:0000255|PROSITE-ProRule:PRU00159, ECO:0000255|PROSITE-ProRule:PRU10027}.	mRNA splicing, via spliceosome [GO:0000398];protein phosphorylation [GO:0006468];RNA splicing [GO:0008380]	ATP binding [GO:0005524];poly(A) RNA binding [GO:0044822];protein kinase activity [GO:0004672];protein serine/threonine kinase activity [GO:0004674];ATP binding [GO:0005524];protein kinase activity [GO:0004672]	catalytic step 2 spliceosome [GO:0071013];chromosome [GO:0005694];nucleoplasm [GO:0005654]	GO:0000398;GO:0004672;GO:0004674;GO:0005524;GO:0005654;GO:0005694;GO:0006468;GO:0008380;GO:0044822;GO:0071013;GO:0004672;GO:0005524
20.0914	21.2238	20.9238	21.8898	21.443	20.9748	22.3779	22.3078	22.0602	23.7261	23.4405	23.651		NaN	NaN	0.689505	+	3.33827	1.35723	1.35723	Q9BT22;K7EID2;K7EPU3;K7EQK1	Q9BT22;K7EID2	Chitobiosyldiphosphodolichol beta-mannosyltransferase	ALG1	CATALYTIC ACTIVITY: GDP-mannose + chitobiosyldiphosphodolichol = GDP + beta-1,4-D-mannosylchitobiosyldiphosphodolichol.	2.4.1.142		dolichol-linked oligosaccharide biosynthetic process [GO:0006488];lipopolysaccharide biosynthetic process [GO:0009103];protein glycosylation [GO:0006486]	chitobiosyldiphosphodolichol beta-mannosyltransferase activity [GO:0004578];mannosyltransferase activity [GO:0000030];transferase activity, transferring glycosyl groups [GO:0016757];transferase activity, transferring glycosyl groups [GO:0016757];transferase activity, transferring glycosyl groups [GO:0016757]	endoplasmic reticulum [GO:0005783];endoplasmic reticulum membrane [GO:0005789];integral component of membrane [GO:0016021];membrane [GO:0016020];integral component of membrane [GO:0016021]	GO:0000030;GO:0004578;GO:0005783;GO:0005789;GO:0006486;GO:0006488;GO:0009103;GO:0016020;GO:0016021;GO:0016757;GO:0016021;GO:0016757;GO:0016757
21.3875	21.0372	20.2232	21.1644	20.9307	20.849	19.5783	19.9464	18.7609	20.816	20.9725	20.6136		NaN	NaN	0.0987542	+	3.30662	1.44676	1.37217	Q96GE9	Q96GE9	Transmembrane protein 261	TMEM261						integral component of membrane [GO:0016021]	GO:0016021
25.1856	25.1163	25.7844	24.7974	25.3213	25.1521	24.6327	24.1945	24.7454	25.8216	26.0763	26.1271		0.445372	-0.271834	-0.271834	+	2.81478	1.48413	1.48413	P05141;Q9H0C2	P05141	ADP/ATP translocase 2;ADP/ATP translocase 2, N-terminally processed	SLC25A5				chromosome segregation [GO:0007059];negative regulation of mitochondrial outer membrane permeabilization involved in apoptotic signaling pathway [GO:1901029];positive regulation of cell proliferation [GO:0008284];regulation of insulin secretion [GO:0050796];transport [GO:0006810];viral process [GO:0016032];transmembrane transport [GO:0055085]	adenine transmembrane transporter activity [GO:0015207];poly(A) RNA binding [GO:0044822];ubiquitin protein ligase binding [GO:0031625];transporter activity [GO:0005215]	extracellular exosome [GO:0070062];extracellular matrix [GO:0031012];integral component of plasma membrane [GO:0005887];membrane [GO:0016020];mitochondrial inner membrane [GO:0005743];mitochondrial nucleoid [GO:0042645];mitochondrion [GO:0005739];MMXD complex [GO:0071817];myelin sheath [GO:0043209];nucleus [GO:0005634];integral component of membrane [GO:0016021];mitochondrial inner membrane [GO:0…	GO:0005634;GO:0005739;GO:0005743;GO:0005887;GO:0006810;GO:0007059;GO:0008284;GO:0015207;GO:0016020;GO:0016032;GO:0031012;GO:0031625;GO:0042645;GO:0043209;GO:0044822;GO:0050796;GO:0070062;GO:0071817;GO:1901029;GO:0005215;GO:0005634;GO:0005739;GO:0005743;GO:0016021;GO:0031514;GO:0055085
24.7379	23.2212	25.6795	23.257	23.619	24.6699	25.0448	25.2208	25.2737	26.6922	26.6054	26.7562		0.347749	-0.697567	-0.697567	+	4.28859	1.50483	1.50483	P40939;H0YFD6	P40939	Trifunctional enzyme subunit alpha, mitochondrial;Long-chain enoyl-CoA hydratase;Long chain 3-hydroxyacyl-CoA dehydrogenase	HADHA	CATALYTIC ACTIVITY: (3S)-3-hydroxyacyl-CoA = trans-2(or 3)-enoyl-CoA + H(2)O.;CATALYTIC ACTIVITY: A long-chain (S)-3-hydroxyacyl-CoA + NAD(+) = a long-chain 3-oxoacyl-CoA + NADH.	4.2.1.17;1.1.1.211		cardiolipin acyl-chain remodeling [GO:0035965];fatty acid beta-oxidation [GO:0006635];response to drug [GO:0042493];response to insulin [GO:0032868];fatty acid metabolic process [GO:0006631]	3-hydroxyacyl-CoA dehydrogenase activity [GO:0003857];acetyl-CoA C-acetyltransferase activity [GO:0003985];enoyl-CoA hydratase activity [GO:0004300];fatty-acyl-CoA binding [GO:0000062];long-chain-3-hydroxyacyl-CoA dehydrogenase activity [GO:0016509];long-chain-enoyl-CoA hydratase activity [GO:0016508];NAD binding [GO:0051287];3-hydroxyacyl-CoA dehydrogenase activity [GO:0003857]	extracellular matrix [GO:0031012];mitochondrial fatty acid beta-oxidation multienzyme complex [GO:0016507];mitochondrial inner membrane [GO:0005743];mitochondrial nucleoid [GO:0042645];mitochondrion [GO:0005739]	GO:0000062;GO:0003857;GO:0003985;GO:0004300;GO:0005739;GO:0005743;GO:0006635;GO:0016507;GO:0016508;GO:0016509;GO:0031012;GO:0032868;GO:0035965;GO:0042493;GO:0042645;GO:0051287;GO:0003857;GO:0006631
20.4325	21.2965	20.7904	20.8244	19.9374	20.8218	20.0507	20.2287	20.9915	21.8785	22.0905	21.9102		NaN	NaN	-0.311917	+	2.65112	1.9881	1.53611	A0A087WZ62;Q9H6U8;H0YCW6;A0A087WTZ3;A0A087WV58;A0A087WVC0;A0A087WZY8	A0A087WZ62;Q9H6U8;H0YCW6	Alpha-1,2-mannosyltransferase ALG9	ALG9	CATALYTIC ACTIVITY: Dolichyl beta-D-mannosyl phosphate + D-Man-alpha-(1->2)-D-Man-alpha-(1->2)-D-Man-alpha-(1->3)-(D-Man-alpha-(1->3)-D-Man-alpha-(1->6))-D-Man-beta-(1->4)-D-GlcNAc-beta-(1->4)-D-GlcNAc-diphosphodolichol = D-Man-alpha-(1->2)-D-Man-alpha-(1->2)-D-Man-alpha-(1->3)-(D-Man-alpha-(1->2)-D-Man-alpha-(1->3)-D-Man-alpha-(1->6))-D-Man-beta-(1->4)-D-GlcNAc-beta-(1->4)-D-GlcNAc-diphosphodoli…	2.4.1.259;2.4.1.261;2.4.1.-;2.4.1.-;2.4.1.-;2.4.1.-;2.4.1.-;2.4.1.-		dolichol-linked oligosaccharide biosynthetic process [GO:0006488];protein glycosylation [GO:0006486]	alpha-1,2-mannosyltransferase activity [GO:0000026];dol-P-Man:Man(6)GlcNAc(2)-PP-Dol alpha-1,2-mannosyltransferase activity [GO:0052926];dol-P-Man:Man(8)GlcNAc(2)-PP-Dol alpha-1,2-mannosyltransferase activity [GO:0052918];mannosyltransferase activity [GO:0000030];transferase activity, transferring glycosyl groups [GO:0016757];transferase activity, transferring glycosyl groups [GO:0016757];transfe…	endoplasmic reticulum [GO:0005783];endoplasmic reticulum membrane [GO:0005789];integral component of membrane [GO:0016021];membrane [GO:0016020];endoplasmic reticulum membrane [GO:0005789];endoplasmic reticulum membrane [GO:0005789];integral component of membrane [GO:0016021];endoplasmic reticulum membrane [GO:0005789];endoplasmic reticulum membrane [GO:0005789];endoplasmic reticulum membrane [GO…	GO:0000026;GO:0000030;GO:0005783;GO:0005789;GO:0006486;GO:0006488;GO:0016020;GO:0016021;GO:0052918;GO:0052926;GO:0005789;GO:0016757;GO:0005789;GO:0016021;GO:0016757;GO:0005789;GO:0016757;GO:0005789;GO:0016757;GO:0005789;GO:0016021;GO:0016757;GO:0005789;GO:0016021;GO:0016757
19.7744	21.3832	20.653	20.3587	20.5078	20.7489	19.7484	20.3037	19.1021	21.2703	21.3919	21.3701		NaN	NaN	-0.0650539	+	2.2977	1.73166	1.62602	E7ETA6;A6NNN6;Q15154;H0YBA1;E5RGQ4;E9PGW9;E7EV93	E7ETA6;A6NNN6;Q15154	Pericentriolar material 1 protein	PCM1				centrosome organization [GO:0051297];cilium assembly [GO:0060271];cytoplasmic microtubule organization [GO:0031122];G2/M transition of mitotic cell cycle [GO:0000086];interkinetic nuclear migration [GO:0022027];intraciliary transport involved in cilium assembly [GO:0035735];microtubule anchoring [GO:0034453];microtubule anchoring at centrosome [GO:0034454];negative regulation of neurogenesis [GO:…	identical protein binding [GO:0042802]	apical part of cell [GO:0045177];centriolar satellite [GO:0034451];centriole [GO:0005814];centrosome [GO:0005813];ciliary basal body [GO:0036064];ciliary transition zone [GO:0035869];cytoplasm [GO:0005737];cytosol [GO:0005829];membrane [GO:0016020];nuclear membrane [GO:0031965];pericentriolar material [GO:0000242];protein complex [GO:0043234];centrosome [GO:0005813];centrosome [GO:0005813];cytopl…	GO:0000086;GO:0000242;GO:0001764;GO:0005737;GO:0005813;GO:0005814;GO:0005829;GO:0016020;GO:0022027;GO:0031122;GO:0031965;GO:0034451;GO:0034453;GO:0034454;GO:0035176;GO:0035735;GO:0035869;GO:0036064;GO:0042802;GO:0043234;GO:0045177;GO:0050768;GO:0051297;GO:0060271;GO:0071539;GO:0090316;GO:0097150;GO:1905515;GO:0005813;GO:0034454;GO:0071539;GO:0005737;GO:0005813;GO:0031965;GO:0034454;GO:0071539;GO:…
25.3191	26.2524	26.4678	25.9218	25.9324	26.1861	25.7723	25.92	25.6135	27.3854	27.5074	27.4589		0.000299645	0.000333786	0.000333786	+	4.21727	1.68197	1.68197	O14980;C9JKM9;C9IZS4;C9JQ02;C9JV99;C9J673;F8WF71;C9IYM2;H7BZC5;C9JF49	O14980	Exportin-1	XPO1				intracellular transport of virus [GO:0075733];mRNA transport [GO:0051028];negative regulation of transcription from RNA polymerase II promoter [GO:0000122];protein export from nucleus [GO:0006611];protein localization to nucleus [GO:0034504];regulation of centrosome duplication [GO:0010824];regulation of mRNA stability [GO:0043488];regulation of protein catabolic process [GO:0042176];regulation o…	nuclear export signal receptor activity [GO:0005049];nucleocytoplasmic transporter activity [GO:0005487];RNA binding [GO:0003723];transporter activity [GO:0005215]	annulate lamellae [GO:0005642];Cajal body [GO:0015030];cytoplasm [GO:0005737];cytosol [GO:0005829];intracellular membrane-bounded organelle [GO:0043231];intracellular ribonucleoprotein complex [GO:0030529];kinetochore [GO:0000776];membrane [GO:0016020];nuclear envelope [GO:0005635];nuclear membrane [GO:0031965];nucleolus [GO:0005730];nucleoplasm [GO:0005654];nucleus [GO:0005634];intracellular [GO…	GO:0000054;GO:0000055;GO:0000056;GO:0000122;GO:0000776;GO:0003723;GO:0005049;GO:0005215;GO:0005487;GO:0005634;GO:0005635;GO:0005642;GO:0005654;GO:0005730;GO:0005737;GO:0005829;GO:0006611;GO:0007062;GO:0010824;GO:0015030;GO:0016020;GO:0016032;GO:0030529;GO:0031965;GO:0034504;GO:0042176;GO:0042493;GO:0043231;GO:0043488;GO:0046825;GO:0051028;GO:0075733;GO:0005622;GO:0006886;GO:0005622;GO:0006886;GO:…
21.5466	21.2679	20.0357	20.8946	22.1106	21.1111	19.826	20.8447	19.3658	21.6315	21.7966	21.6859		NaN	NaN	0.421984	+	2.94159	2.49455	1.69247	Q8TCJ2	Q8TCJ2	Dolichyl-diphosphooligosaccharide--protein glycosyltransferase subunit STT3B	STT3B	CATALYTIC ACTIVITY: Dolichyl diphosphooligosaccharide + [protein]-L-asparagine = dolichyl diphosphate + a glycoprotein with the oligosaccharide chain attached by N-beta-D-glycosyl linkage to a protein L-asparagine.	2.4.99.18		co-translational protein modification [GO:0043686];ER-associated ubiquitin-dependent protein catabolic process [GO:0030433];glycoprotein catabolic process [GO:0006516];post-translational protein modification [GO:0043687];protein N-linked glycosylation via asparagine [GO:0018279];response to unfolded protein [GO:0006986]	dolichyl-diphosphooligosaccharide-protein glycotransferase activity [GO:0004579]	endoplasmic reticulum [GO:0005783];integral component of membrane [GO:0016021];membrane [GO:0016020];oligosaccharyltransferase complex [GO:0008250]	GO:0004579;GO:0005783;GO:0006516;GO:0006986;GO:0008250;GO:0016020;GO:0016021;GO:0018279;GO:0030433;GO:0043686;GO:0043687
20.5922	20.6515	21.0323	21.0426	20.3895	21.1963	19.5959	20.1352	20.0984	21.8213	21.6989	21.5206		NaN	NaN	0.117439	+	3.18402	1.46443	1.73709	Q9Y394;A0A087X0Z7;H0YJ66;H0YJE4;G3V5J0;H0YJR8	Q9Y394;A0A087X0Z7;H0YJ66;H0YJE4	Dehydrogenase/reductase SDR family member 7	DHRS7		1.1.-.-	ACT_SITE 203 203 Proton acceptor. {ECO:0000255|PROSITE-ProRule:PRU10001}.		oxidoreductase activity [GO:0016491];oxidoreductase activity [GO:0016491];oxidoreductase activity [GO:0016491];oxidoreductase activity [GO:0016491]	membrane [GO:0016020]	GO:0016020;GO:0016491;GO:0016491;GO:0016491;GO:0016491
20.6809	20.4411	20.8419	21.0215	20.2965	20.8592	19.8287	19.581	18.8019	21.0786	21.2639	21.1106		NaN	NaN	0.0710971	+	2.3706	1.76617	1.74716	Q9UKG1;C9K0C4	Q9UKG1;C9K0C4	DCC-interacting protein 13-alpha	APPL1				cell cycle [GO:0007049];cell proliferation [GO:0008283];extrinsic apoptotic signaling pathway in absence of ligand [GO:0097192];insulin receptor signaling pathway [GO:0008286];regulation of establishment of protein localization to plasma membrane [GO:0090003];regulation of glucose import [GO:0046324];signal transduction [GO:0007165]	identical protein binding [GO:0042802];protein kinase B binding [GO:0043422]	cytoplasm [GO:0005737];cytosol [GO:0005829];early endosome membrane [GO:0031901];endosome membrane [GO:0010008];extracellular exosome [GO:0070062];nucleus [GO:0005634];vesicle membrane [GO:0012506]	GO:0005634;GO:0005737;GO:0005829;GO:0007049;GO:0007165;GO:0008283;GO:0008286;GO:0010008;GO:0012506;GO:0031901;GO:0042802;GO:0043422;GO:0046324;GO:0070062;GO:0090003;GO:0097192
21.0685	21.4295	20.3289	21.9751	19.2661	21.5984	19.854	19.0222	19.8052	21.4588	21.0827	21.3891		NaN	NaN	0.00419362	+	3.20517	1.98055	1.74974	Q70CQ2;A0A0C4DG73	Q70CQ2;A0A0C4DG73	Ubiquitin carboxyl-terminal hydrolase 34;Ubiquitin carboxyl-terminal hydrolase	USP34	CATALYTIC ACTIVITY: Thiol-dependent hydrolysis of ester, thioester, amide, peptide and isopeptide bonds formed by the C-terminal Gly of ubiquitin (a 76-residue protein attached to proteins as an intracellular targeting signal). {ECO:0000269|PubMed:14715245, ECO:0000269|PubMed:21383061}.	3.4.19.12	ACT_SITE 1903 1903 Nucleophile. {ECO:0000305}.;ACT_SITE 2164 2164 Proton acceptor. {ECO:0000255|PROSITE-ProRule:PRU10092, ECO:0000255|PROSITE-ProRule:PRU10093}.	histone deubiquitination [GO:0016578];positive regulation of canonical Wnt signaling pathway [GO:0090263];protein deubiquitination [GO:0016579];protein K48-linked deubiquitination [GO:0071108];regulation of transcription, DNA-templated [GO:0006355];ubiquitin-dependent protein catabolic process [GO:0006511];Wnt signaling pathway [GO:0016055];protein deubiquitination [GO:0016579];ubiquitin-dependen…	cysteine-type endopeptidase activity [GO:0004197];thiol-dependent ubiquitin-specific protease activity [GO:0004843];thiol-dependent ubiquitinyl hydrolase activity [GO:0036459]	cytosol [GO:0005829];SAGA complex [GO:0000124]	GO:0000124;GO:0004197;GO:0004843;GO:0005829;GO:0006355;GO:0006511;GO:0016055;GO:0016578;GO:0016579;GO:0071108;GO:0090263;GO:0006511;GO:0016579;GO:0036459
21.3839	20.6315	18.9319	20.0072	19.628	20.3598	19.88	19.33	19.4561	21.1019	21.7584	21.1174		NaN	NaN	-0.317415	+	2.57724	1.70096	1.77056	Q99797	Q99797	Mitochondrial intermediate peptidase	MIPEP	CATALYTIC ACTIVITY: Release of an N-terminal octapeptide as second stage of processing of some proteins imported into the mitochondrion.	3.4.24.59	ACT_SITE 496 496 {ECO:0000255|PROSITE-ProRule:PRU10095}.	peptide metabolic process [GO:0006518];protein processing involved in protein targeting to mitochondrion [GO:0006627]	metal ion binding [GO:0046872];metalloendopeptidase activity [GO:0004222]	mitochondrial matrix [GO:0005759];mitochondrion [GO:0005739]	GO:0004222;GO:0005739;GO:0005759;GO:0006518;GO:0006627;GO:0046872
20.4137	20.7494	20.9663	20.6502	21.3637	20.0327	19.9735	20.1979	19.6813	22.148	21.6909	21.3536		NaN	NaN	-0.0276121	+	2.69324	2.67883	1.77995	Q9HCK8;Q8TD26;C9JFU2;H7C294;H0YJG4;H3BTW3;Q3L8U1;Q9P2D1	Q9HCK8	Chromodomain-helicase-DNA-binding protein 8	CHD8	CATALYTIC ACTIVITY: ATP + H(2)O = ADP + phosphate.;CATALYTIC ACTIVITY: ATP + H(2)O = ADP + phosphate.;CATALYTIC ACTIVITY: ATP + H(2)O = ADP + phosphate. {ECO:0000269|PubMed:17027977}.;CATALYTIC ACTIVITY: ATP + H(2)O = ADP + phosphate. {ECO:0000255|HAMAP-Rule:MF_03071}.	3.6.4.12;3.6.4.12;3.6.4.12;3.6.4.12		cellular lipid metabolic process [GO:0044255];covalent chromatin modification [GO:0016569];regulation of transcription, DNA-templated [GO:0006355];transcription, DNA-templated [GO:0006351];adult heart development [GO:0007512];adult walking behavior [GO:0007628];aorta morphogenesis [GO:0035909];atrioventricular canal development [GO:0036302];blood circulation [GO:0008015];blood vessel remodeling […	ATP binding [GO:0005524];DNA binding [GO:0003677];helicase activity [GO:0004386];ATP binding [GO:0005524];chromatin binding [GO:0003682];helicase activity [GO:0004386];promoter-specific chromatin binding [GO:1990841];RNA polymerase II core promoter proximal region sequence-specific DNA binding [GO:0000978];ATP binding [GO:0005524];ATP-dependent helicase activity [GO:0008026];DNA binding [GO:00036…	cytoplasm [GO:0005737];nucleoplasm [GO:0005654];nucleus [GO:0005634];plasma membrane [GO:0005886];nucleolus [GO:0005730];nucleus [GO:0005634];nucleoplasm [GO:0005654];MLL1 complex [GO:0071339];nucleoplasm [GO:0005654];nucleus [GO:0005634];protein complex [GO:0043234];nucleus [GO:0005634]	GO:0003677;GO:0004386;GO:0005524;GO:0005634;GO:0005654;GO:0005737;GO:0005886;GO:0006351;GO:0006355;GO:0016569;GO:0044255;GO:0000978;GO:0001501;GO:0001701;GO:0001974;GO:0003007;GO:0003222;GO:0003226;GO:0003682;GO:0004386;GO:0005524;GO:0005634;GO:0005730;GO:0006338;GO:0006351;GO:0006355;GO:0006364;GO:0007417;GO:0007512;GO:0007605;GO:0007628;GO:0008015;GO:0010880;GO:0016569;GO:0021545;GO:0021553;GO:…
20.249	21.1232	20.9822	21.3578	19.8434	19.929	19.2655	20.1738	18.8505	21.2672	21.2152	21.208		NaN	NaN	-0.408014	+	2.9991	2.09095	1.80018	P07099	P07099	Epoxide hydrolase 1	EPHX1	CATALYTIC ACTIVITY: Cis-stilbene oxide + H(2)O = (+)-(1R,2R)-1,2-diphenylethane-1,2-diol.	3.3.2.9		aromatic compound catabolic process [GO:0019439];response to organic cyclic compound [GO:0014070];response to toxic substance [GO:0009636];xenobiotic metabolic process [GO:0006805]	cis-stilbene-oxide hydrolase activity [GO:0033961];epoxide hydrolase activity [GO:0004301]	endoplasmic reticulum membrane [GO:0005789];integral component of membrane [GO:0016021];organelle membrane [GO:0031090]	GO:0004301;GO:0005789;GO:0006805;GO:0009636;GO:0014070;GO:0016021;GO:0019439;GO:0031090;GO:0033961
20.5335	20.4189	20.0533	20.8959	20.5783	20.1033	20.0862	20.1746	19.2987	21.6747	22.5768	20.7464		NaN	NaN	0.19058	+	1.63008	2.60926	1.81279	H3BR29;H3BSM7;Q96GQ5;H3BTA0;H3BS97	H3BR29;H3BSM7;Q96GQ5	RUS1 family protein C16orf58	C16orf58						integral component of membrane [GO:0016021];membrane [GO:0016020];integral component of membrane [GO:0016021];integral component of membrane [GO:0016021]	GO:0016020;GO:0016021;GO:0016021;GO:0016021
25.0159	26.3214	26.4322	25.8791	26.5144	26.2787	26.3692	26.1713	26.3959	27.8648	28.2762	28.278		0.24171	0.300934	0.300901	+	3.53274	1.82753	1.82753	Q01813;B1APP8;B1APP6;Q5VSR5;H0Y757;V9GYV7;V9GY25;H0Y3Y3;P08237	Q01813	ATP-dependent 6-phosphofructokinase, platelet type	PFKP	CATALYTIC ACTIVITY: ATP + D-fructose 6-phosphate = ADP + D-fructose 1,6-bisphosphate. {ECO:0000255|HAMAP-Rule:MF_03184}.;CATALYTIC ACTIVITY: ATP + D-fructose 6-phosphate = ADP + D-fructose 1,6-bisphosphate. {ECO:0000255|HAMAP-Rule:MF_03184}.	2.7.1.11;2.7.1.11	ACT_SITE 166 166 Proton acceptor. {ECO:0000255|HAMAP-Rule:MF_03184}.;ACT_SITE 175 175 Proton acceptor. {ECO:0000255|HAMAP-Rule:MF_03184}.	canonical glycolysis [GO:0061621];fructose 6-phosphate metabolic process [GO:0006002];glucose homeostasis [GO:0042593];glycogen catabolic process [GO:0005980];glycolysis from storage polysaccharide through glucose-1-phosphate [GO:0093001];glycolytic process [GO:0006096];muscle cell cellular homeostasis [GO:0046716];positive regulation of insulin secretion [GO:0032024];protein oligomerization [GO:…	6-phosphofructokinase activity [GO:0003872];ATP binding [GO:0005524];fructose binding [GO:0070061];identical protein binding [GO:0042802];kinase binding [GO:0019900];metal ion binding [GO:0046872];protein C-terminus binding [GO:0008022];6-phosphofructokinase activity [GO:0003872];ATP binding [GO:0005524];cadherin binding involved in cell-cell adhesion [GO:0098641];metal ion binding [GO:0046872];p…	6-phosphofructokinase complex [GO:0005945];apical plasma membrane [GO:0016324];cytosol [GO:0005829];extracellular exosome [GO:0070062];sperm principal piece [GO:0097228];cell-cell adherens junction [GO:0005913];cytoplasm [GO:0005737];cytosol [GO:0005829];extracellular exosome [GO:0070062];extracellular matrix [GO:0031012];membrane [GO:0016020];nucleus [GO:0005634]	GO:0003872;GO:0005524;GO:0005829;GO:0005945;GO:0005980;GO:0006002;GO:0006096;GO:0008022;GO:0016324;GO:0019900;GO:0032024;GO:0042593;GO:0042802;GO:0046716;GO:0046872;GO:0051259;GO:0061621;GO:0070061;GO:0070062;GO:0093001;GO:0097228;GO:0003872;GO:0005524;GO:0005634;GO:0005737;GO:0005829;GO:0005913;GO:0006002;GO:0016020;GO:0031012;GO:0032403;GO:0046872;GO:0061621;GO:0070062;GO:0098641;GO:0003872;GO:…
21.49	20.8993	20.8076	20.157	20.9158	20.8854	19.8257	19.5238	20.2559	21.7108	21.82	21.5826		NaN	NaN	-0.412873	+	1.89223	2.28249	1.836	Q9H6R6;A0A0D9SEX5	Q9H6R6;A0A0D9SEX5	Palmitoyltransferase ZDHHC6	ZDHHC6	CATALYTIC ACTIVITY: Palmitoyl-CoA + [protein]-L-cysteine = [protein]-S-palmitoyl-L-cysteine + CoA. {ECO:0000269|PubMed:22314232}.;CATALYTIC ACTIVITY: Palmitoyl-CoA + [protein]-L-cysteine = [protein]-S-palmitoyl-L-cysteine + CoA. {ECO:0000256|RuleBase:RU079119}.	2.3.1.225;2.3.1.225		protein palmitoylation [GO:0018345]	palmitoyltransferase activity [GO:0016409];protein-cysteine S-palmitoyltransferase activity [GO:0019706];zinc ion binding [GO:0008270];protein-cysteine S-palmitoyltransferase activity [GO:0019706];zinc ion binding [GO:0008270]	endoplasmic reticulum [GO:0005783];endoplasmic reticulum membrane [GO:0005789];integral component of membrane [GO:0016021];integral component of membrane [GO:0016021]	GO:0005783;GO:0005789;GO:0008270;GO:0016021;GO:0016409;GO:0018345;GO:0019706;GO:0008270;GO:0016021;GO:0019706
20.5748	23.2536	20.2355	21.7749	20.3585	20.7805	22.1379	22.0815	21.4028	23.8831	23.8709	23.4645		NaN	NaN	-0.383327	+	2.61798	1.86543	1.86543	O15258;Q5T092;A0A0A0MR06;Q5T091;Q5T093	O15258;Q5T092;A0A0A0MR06;Q5T091;Q5T093	Protein RER1	RER1				positive regulation of establishment of protein localization to plasma membrane [GO:0090004];retrograde vesicle-mediated transport, Golgi to ER [GO:0006890];skeletal muscle acetylcholine-gated channel clustering [GO:0071340]		cell surface [GO:0009986];endoplasmic reticulum-Golgi intermediate compartment [GO:0005793];Golgi apparatus [GO:0005794];integral component of Golgi membrane [GO:0030173];plasma membrane [GO:0005886];integral component of membrane [GO:0016021];Golgi apparatus [GO:0005794];integral component of membrane [GO:0016021];Golgi apparatus [GO:0005794];integral component of membrane [GO:0016021];integral …	GO:0005793;GO:0005794;GO:0005886;GO:0006890;GO:0009986;GO:0030173;GO:0071340;GO:0090004;GO:0016021;GO:0005794;GO:0016021;GO:0005794;GO:0016021;GO:0016021
21.9176	20.4848	19.9659	21.1093	20.3709	21.241	19.367	19.7507	20.2127	21.3324	21.7577	21.9169		NaN	NaN	0.117625	+	2.40465	1.95324	1.8922	O60725	O60725	Protein-S-isoprenylcysteine O-methyltransferase	ICMT	CATALYTIC ACTIVITY: S-adenosyl-L-methionine + protein C-terminal S-farnesyl-L-cysteine = S-adenosyl-L-homocysteine + protein C-terminal S-farnesyl-L-cysteine methyl ester. {ECO:0000255|PROSITE-ProRule:PRU00897}.	2.1.1.100		cellular protein modification process [GO:0006464];C-terminal protein methylation [GO:0006481];post-translational protein modification [GO:0043687];protein targeting to membrane [GO:0006612]	protein C-terminal carboxyl O-methyltransferase activity [GO:0003880];protein C-terminal S-isoprenylcysteine carboxyl O-methyltransferase activity [GO:0004671]	endoplasmic reticulum [GO:0005783];endoplasmic reticulum membrane [GO:0005789];integral component of membrane [GO:0016021];membrane [GO:0016020]	GO:0003880;GO:0004671;GO:0005783;GO:0005789;GO:0006464;GO:0006481;GO:0006612;GO:0016020;GO:0016021;GO:0043687
20.8323	20.9666	19.9163	21.2861	19.8431	20.2199	20.6134	19.9494	19.1585	22.1541	21.7652	21.6415		NaN	NaN	-0.121994	+	1.94032	2.36868	1.94651	Q5R3B4;O95563	Q5R3B4;O95563	Mitochondrial pyruvate carrier 2	MPC2				mitochondrial acetyl-CoA biosynthetic process from pyruvate [GO:0061732];mitochondrial pyruvate transmembrane transport [GO:1902361];positive regulation of insulin secretion involved in cellular response to glucose stimulus [GO:0035774];mitochondrial pyruvate transport [GO:0006850]	pyruvate transmembrane transporter activity [GO:0050833]	integral component of mitochondrial inner membrane [GO:0031305];mitochondrion [GO:0005739];nucleus [GO:0005634];mitochondrial inner membrane [GO:0005743]	GO:0005634;GO:0005739;GO:0031305;GO:0035774;GO:0050833;GO:0061732;GO:1902361;GO:0005743;GO:0006850
21.267	21.2377	21.2956	22.6189	21.0727	21.5445	19.8946	19.8203	20.7519	21.8772	22.0768	22.3911		NaN	NaN	0.478598	+	2.29429	2.00631	1.9594	Q6EEV6;A8MUA9;A8MU27;P61956;P55854	Q6EEV6;A8MUA9;A8MU27;P61956;P55854	Small ubiquitin-related modifier 4;Small ubiquitin-related modifier 2;Small ubiquitin-related modifier 3	SUMO4;SUMO3;SUMO2				global genome nucleotide-excision repair [GO:0070911];positive regulation of proteasomal ubiquitin-dependent protein catabolic process [GO:0032436];positive regulation of transcription from RNA polymerase II promoter [GO:0045944];protein sumoylation [GO:0016925];global genome nucleotide-excision repair [GO:0070911];protein sumoylation [GO:0016925];protein sumoylation [GO:0016925];protein sumoylat…	poly(A) RNA binding [GO:0044822];protein tag [GO:0031386];SUMO transferase activity [GO:0019789];ubiquitin protein ligase binding [GO:0031625];protein tag [GO:0031386];protein tag [GO:0031386]	nucleoplasm [GO:0005654];nucleus [GO:0005634];PML body [GO:0016605];cytoplasm [GO:0005737];extracellular exosome [GO:0070062];kinetochore [GO:0000776];nucleoplasm [GO:0005654];nucleus [GO:0005634];PML body [GO:0016605];nucleus [GO:0005634];nucleus [GO:0005634];nucleus [GO:0005634]	GO:0005634;GO:0005654;GO:0016605;GO:0016925;GO:0019789;GO:0031386;GO:0031625;GO:0032436;GO:0044822;GO:0045944;GO:0070911;GO:0000776;GO:0005634;GO:0005654;GO:0005737;GO:0016605;GO:0016925;GO:0031386;GO:0070062;GO:0070911;GO:0005634;GO:0016925;GO:0031386;GO:0005634;GO:0016925;GO:0005634;GO:0016925
21.0336	21.5694	21.4231	21.4086	19.7826	21.4011	18.5139	19.5216	20.68	21.2322	21.4377	21.9384		NaN	NaN	-0.47795	+	1.82522	2.41202	1.96425	P30419;K7EN82;B7Z8J4	P30419;K7EN82	Glycylpeptide N-tetradecanoyltransferase 1	NMT1	CATALYTIC ACTIVITY: Tetradecanoyl-CoA + glycylpeptide = CoA + N-tetradecanoylglycylpeptide. {ECO:0000269|PubMed:25255805, ECO:0000269|PubMed:9353336, ECO:0000269|PubMed:9506952}.	2.3.1.97		in utero embryonic development [GO:0001701];N-terminal peptidyl-glycine N-myristoylation [GO:0018008];N-terminal protein myristoylation [GO:0006499];positive regulation of protein insertion into mitochondrial membrane involved in apoptotic signaling pathway [GO:1900740];regulation of rhodopsin mediated signaling pathway [GO:0022400];N-terminal protein myristoylation [GO:0006499];N-terminal protei…	glycylpeptide N-tetradecanoyltransferase activity [GO:0004379];myristoyltransferase activity [GO:0019107];glycylpeptide N-tetradecanoyltransferase activity [GO:0004379];glycylpeptide N-tetradecanoyltransferase activity [GO:0004379]	actin cytoskeleton [GO:0015629];cell junction [GO:0030054];cytoplasm [GO:0005737];cytosol [GO:0005829];extrinsic component of membrane [GO:0019898];mitochondrion [GO:0005739];plasma membrane [GO:0005886];actin cytoskeleton [GO:0015629];cell junction [GO:0030054];cytoplasm [GO:0005737]	GO:0001701;GO:0004379;GO:0005737;GO:0005739;GO:0005829;GO:0005886;GO:0006499;GO:0015629;GO:0018008;GO:0019107;GO:0019898;GO:0022400;GO:0030054;GO:1900740;GO:0004379;GO:0006499;GO:0004379;GO:0005737;GO:0006499;GO:0015629;GO:0030054
21.4711	20.7558	21.7657	20.0197	20.7873	20.4183	19.8362	18.8036	19.5818	26.7184	26.8449	27.2202		NaN	NaN	-0.922478	+	3.88679	6.68353	7.52064	Q53GQ0;A0A1B0GV93;A0A1B0GVY6;E9PI21;A0A1B0GW85;A0A1B0GU83	Q53GQ0;A0A1B0GV93;A0A1B0GVY6	Very-long-chain 3-oxoacyl-CoA reductase	HSD17B12	CATALYTIC ACTIVITY: A very-long-chain (3R)-3-hydroxyacyl-CoA + NADP(+) = a very-long-chain 3-oxoacyl-CoA + NADPH. {ECO:0000269|PubMed:12482854}.;CATALYTIC ACTIVITY: 17-beta-estradiol + NAD(P)(+) = estrone + NAD(P)H. {ECO:0000269|PubMed:16166196}.	1.1.1.330;1.1.1.62	ACT_SITE 202 202 Proton acceptor. {ECO:0000255|PROSITE-ProRule:PRU10001}.	estrogen biosynthetic process [GO:0006703];extracellular matrix organization [GO:0030198];fatty acid biosynthetic process [GO:0006633];long-chain fatty-acyl-CoA biosynthetic process [GO:0035338];positive regulation of cell-substrate adhesion [GO:0010811];steroid biosynthetic process [GO:0006694]	3-oxo-arachidoyl-CoA reductase activity [GO:0102339];3-oxo-behenoyl-CoA reductase activity [GO:0102340];3-oxo-cerotoyl-CoA reductase activity [GO:0102342];3-oxo-lignoceroyl-CoA reductase activity [GO:0102341];estradiol 17-beta-dehydrogenase activity [GO:0004303];heparin binding [GO:0008201];long-chain-3-hydroxyacyl-CoA dehydrogenase activity [GO:0016509];oxidoreductase activity [GO:0016491]	endoplasmic reticulum membrane [GO:0005789];integral component of membrane [GO:0016021];proteinaceous extracellular matrix [GO:0005578];integral component of membrane [GO:0016021];integral component of membrane [GO:0016021];integral component of membrane [GO:0016021];integral component of membrane [GO:0016021]	GO:0004303;GO:0005578;GO:0005789;GO:0006633;GO:0006694;GO:0006703;GO:0008201;GO:0010811;GO:0016021;GO:0016509;GO:0030198;GO:0035338;GO:0102339;GO:0102340;GO:0102341;GO:0102342;GO:0016021;GO:0016021;GO:0016021;GO:0016021;GO:0016491
20.902	21.8443	20.2198	21.2437	21.7157	21.4577	19.1464	19.6919	20.0921	27.0272	27.0611	26.8638		NaN	NaN	0.483662	+	3.6526	7.66737	7.34056	Q9BUN8;B4E1G1;E5RGY0	Q9BUN8;B4E1G1;E5RGY0	Derlin-1	DERL1				endoplasmic reticulum unfolded protein response [GO:0030968];ERAD pathway [GO:0036503];ER-associated misfolded protein catabolic process [GO:0071712];ER-associated ubiquitin-dependent protein catabolic process [GO:0030433];establishment of protein localization [GO:0045184];intracellular transport of viral protein in host cell [GO:0019060];positive regulation of protein binding [GO:0032092];positi…	ATPase binding [GO:0051117];MHC class I protein binding [GO:0042288];protease binding [GO:0002020];receptor activity [GO:0004872];ubiquitin protein ligase binding [GO:0031625];ubiquitin-specific protease binding [GO:1990381]	Derlin-1 retrotranslocation complex [GO:0036513];Derlin-1-VIMP complex [GO:0036502];early endosome [GO:0005769];endoplasmic reticulum [GO:0005783];host cell [GO:0043657];integral component of endoplasmic reticulum membrane [GO:0030176];integral component of membrane [GO:0016021];late endosome [GO:0005770];membrane [GO:0016020];endoplasmic reticulum [GO:0005783];endoplasmic reticulum membrane [GO:…	GO:0002020;GO:0004872;GO:0005769;GO:0005770;GO:0005783;GO:0006986;GO:0016020;GO:0016021;GO:0019060;GO:0030176;GO:0030433;GO:0030968;GO:0030970;GO:0031398;GO:0031625;GO:0031648;GO:0032092;GO:0036502;GO:0036503;GO:0036513;GO:0042288;GO:0043657;GO:0045184;GO:0051117;GO:0051260;GO:0071712;GO:1990381;GO:0005783;GO:0005789;GO:0016021;GO:0005783;GO:0005789;GO:0016021
20.3067	21.529	21.0929	21.2653	20.1492	20.6264	18.7668	19.6927	19.8127	26.5505	26.6416	26.3719		NaN	NaN	-0.295898	+	4.1934	6.80828	7.09728	J3KNQ6;Q86VK4	J3KNQ6;Q86VK4	Zinc finger protein 410	ZNF410				regulation of transcription, DNA-templated [GO:0006355];transcription, DNA-templated [GO:0006351]	DNA binding [GO:0003677];metal ion binding [GO:0046872];metal ion binding [GO:0046872];nucleic acid binding [GO:0003676]	nucleus [GO:0005634]	GO:0003677;GO:0005634;GO:0006351;GO:0006355;GO:0046872;GO:0003676;GO:0046872
20.2395	22.0124	20.7741	21.514	20.1439	20.8997	18.7166	18.4631	19.528	25.2914	25.2899	25.3335		NaN	NaN	-0.156122	+	2.88716	6.45997	6.40239	B1AKD8;Q5TZA2;A0A087WW81	B1AKD8;Q5TZA2;A0A087WW81	Rootletin	CROCC				cell cycle [GO:0007049];centriole-centriole cohesion [GO:0010457];centrosome organization [GO:0051297];ciliary basal body organization [GO:0032053];epithelial structure maintenance [GO:0010669];establishment of organelle localization [GO:0051656];photoreceptor cell maintenance [GO:0045494];protein localization [GO:0008104];protein localization to organelle [GO:0033365];centrosome organization [GO…	kinesin binding [GO:0019894];structural molecule activity [GO:0005198]	actin cytoskeleton [GO:0015629];centriole [GO:0005814];centrosome [GO:0005813];ciliary rootlet [GO:0035253];cytoplasm [GO:0005737];extracellular exosome [GO:0070062];photoreceptor inner segment [GO:0001917];plasma membrane [GO:0005886];ciliary rootlet [GO:0035253];ciliary rootlet [GO:0035253]	GO:0001917;GO:0005198;GO:0005737;GO:0005813;GO:0005814;GO:0005886;GO:0007049;GO:0008104;GO:0010457;GO:0010669;GO:0015629;GO:0019894;GO:0032053;GO:0033365;GO:0035253;GO:0045494;GO:0051297;GO:0051656;GO:0070062;GO:0035253;GO:0051297;GO:0035253;GO:0051297
20.4051	20.9212	20.5458	21.5666	21.2799	21.9234	18.8362	19.941	19.7004	25.6307	25.8507	25.7167		NaN	NaN	0.965934	+	3.98472	5.8125	6.24017	B5MDU6;Q9H6V9;B5MCU4;A0A0A0MSH6;C9JHU6;C9JUM0;B5MCE2;B4DRG3;D3YTH1	B5MDU6;Q9H6V9;B5MCU4;A0A0A0MSH6	UPF0554 protein C2orf43	LDAH;C2orf43		3.1.1.-	ACT_SITE 139 139 Nucleophile. {ECO:0000255|PROSITE-ProRule:PRU10037}.;ACT_SITE 271 271 Charge relay system. {ECO:0000305}.;ACT_SITE 300 300 Charge relay system. {ECO:0000305}.	lipid catabolic process [GO:0016042];lipid storage [GO:0019915]	lipase activity [GO:0016298]	endoplasmic reticulum [GO:0005783];lipid particle [GO:0005811]	GO:0005783;GO:0005811;GO:0016042;GO:0016298;GO:0019915
20.4696	19.9426	20.1455	21.6016	22.5575	22.7177	20.1971	19.5894	19.8496	25.6424	25.8297	26.3992		1.22853	1.51928	2.10635	+	4.70816	6.33515	6.07843	Q5VV42	Q5VV42	Threonylcarbamoyladenosine tRNA methylthiotransferase	CDKAL1	CATALYTIC ACTIVITY: N(6)-L-threonylcarbamoyladenine(37) in tRNA + sulfur-(sulfur carrier) + 2 S-adenosyl-L-methionine + reduced electron acceptor = 2-methylthio-N(6)-L-threonylcarbamoyladenine(37) in tRNA + S-adenosyl-L-homocysteine + (sulfur carrier) + L-methionine + 5'-deoxyadenosine + electron acceptor. {ECO:0000269|PubMed:20584901}.	2.8.4.5		maintenance of translational fidelity [GO:1990145];tRNA modification [GO:0006400]	4 iron, 4 sulfur cluster binding [GO:0051539];metal ion binding [GO:0046872];N6-threonylcarbomyladenosine methylthiotransferase activity [GO:0035598];tRNA (N(6)-L-threonylcarbamoyladenosine(37)-C(2))-methylthiotransferase [GO:0061712]	endoplasmic reticulum [GO:0005783];endoplasmic reticulum membrane [GO:0005789];integral component of membrane [GO:0016021];membrane [GO:0016020];rough endoplasmic reticulum [GO:0005791]	GO:0005783;GO:0005789;GO:0005791;GO:0006400;GO:0016020;GO:0016021;GO:0035598;GO:0046872;GO:0051539;GO:0061712;GO:1990145
21.0118	21.4098	21.0126	20.9654	20.0788	20.0197	19.1673	19.7832	19.8945	25.0448	24.9116	25.1843		NaN	NaN	-0.790108	+	3.8034	5.53032	5.43192	Q13370	Q13370	cGMP-inhibited 3,5-cyclic phosphodiesterase B	PDE3B	CATALYTIC ACTIVITY: Nucleoside 3',5'-cyclic phosphate + H(2)O = nucleoside 5'-phosphate.	3.1.4.17	ACT_SITE 737 737 Proton donor. {ECO:0000250}.	angiogenesis [GO:0001525];cAMP catabolic process [GO:0006198];cellular response to insulin stimulus [GO:0032869];negative regulation of angiogenesis [GO:0016525];negative regulation of cAMP-mediated signaling [GO:0043951];negative regulation of cell adhesion [GO:0007162];negative regulation of cell adhesion mediated by integrin [GO:0033629];negative regulation of lipid catabolic process [GO:00509…	3',5'-cyclic-AMP phosphodiesterase activity [GO:0004115];3',5'-cyclic-GMP phosphodiesterase activity [GO:0047555];3',5'-cyclic-nucleotide phosphodiesterase activity [GO:0004114];cGMP-inhibited cyclic-nucleotide phosphodiesterase activity [GO:0004119];metal ion binding [GO:0046872];protein kinase B binding [GO:0043422]	cytosol [GO:0005829];endoplasmic reticulum [GO:0005783];Golgi apparatus [GO:0005794];guanyl-nucleotide exchange factor complex [GO:0032045];integral component of membrane [GO:0016021];membrane [GO:0016020]	GO:0001525;GO:0004114;GO:0004115;GO:0004119;GO:0005783;GO:0005794;GO:0005829;GO:0006198;GO:0007162;GO:0007165;GO:0016020;GO:0016021;GO:0016525;GO:0032045;GO:0032869;GO:0033629;GO:0043422;GO:0043951;GO:0046872;GO:0047555;GO:0050995
21.5912	21.7157	21.3702	21.316	19.9299	20.792	20.8104	19.6551	19.2056	25.7519	25.1594	25.0405		NaN	NaN	-0.879711	+	3.33058	5.43012	5.42691	O75874;C9J4N6;C9JJE5;C9JLU6	O75874	Isocitrate dehydrogenase [NADP] cytoplasmic	IDH1	CATALYTIC ACTIVITY: Isocitrate + NADP(+) = 2-oxoglutarate + CO(2) + NADPH. {ECO:0000269|PubMed:19935646}.	1.1.1.42		2-oxoglutarate metabolic process [GO:0006103];female gonad development [GO:0008585];glutathione metabolic process [GO:0006749];glyoxylate cycle [GO:0006097];isocitrate metabolic process [GO:0006102];NADPH regeneration [GO:0006740];regulation of phospholipid biosynthetic process [GO:0071071];regulation of phospholipid catabolic process [GO:0060696];response to oxidative stress [GO:0006979];respons…	(R)-2-hydroxyglutarate dehydrogenase activity [GO:0051990];cadherin binding involved in cell-cell adhesion [GO:0098641];isocitrate dehydrogenase (NADP+) activity [GO:0004450];magnesium ion binding [GO:0000287];NAD binding [GO:0051287];NADP binding [GO:0050661];protein homodimerization activity [GO:0042803];receptor binding [GO:0005102];isocitrate dehydrogenase (NADP+) activity [GO:0004450];isocit…	cell-cell adherens junction [GO:0005913];cytoplasm [GO:0005737];cytosol [GO:0005829];extracellular exosome [GO:0070062];mitochondrion [GO:0005739];peroxisomal matrix [GO:0005782];peroxisome [GO:0005777]	GO:0000287;GO:0004450;GO:0005102;GO:0005737;GO:0005739;GO:0005777;GO:0005782;GO:0005829;GO:0005913;GO:0006097;GO:0006099;GO:0006102;GO:0006103;GO:0006740;GO:0006749;GO:0006979;GO:0008585;GO:0042803;GO:0048545;GO:0050661;GO:0051287;GO:0051990;GO:0060696;GO:0070062;GO:0071071;GO:0098641;GO:0004450;GO:0006102;GO:0004450;GO:0006102;GO:0004450;GO:0006102
20.5622	20.161	20.9549	20.9542	19.7834	21.2133	19.8364	19.576	19.5986	25.0214	25.0372	25.2082		NaN	NaN	0.0909424	+	3.42321	4.9354	5.41861	Q9BTX1	Q9BTX1	Nucleoporin NDC1	NDC1				gene silencing by RNA [GO:0031047];intracellular transport of virus [GO:0075733];mitotic nuclear envelope disassembly [GO:0007077];mRNA export from nucleus [GO:0006406];nuclear pore complex assembly [GO:0051292];nuclear pore distribution [GO:0031081];protein sumoylation [GO:0016925];protein transport [GO:0015031];regulation of cellular response to heat [GO:1900034];regulation of glucose transport…	structural constituent of nuclear pore [GO:0017056]	actin cytoskeleton [GO:0015629];cytoplasm [GO:0005737];integral component of membrane [GO:0016021];membrane [GO:0016020];nuclear envelope [GO:0005635];nuclear membrane [GO:0031965];nuclear pore [GO:0005643];nuclear pore transmembrane ring [GO:0070762];plasma membrane [GO:0005886]	GO:0005635;GO:0005643;GO:0005737;GO:0005886;GO:0006406;GO:0006409;GO:0007077;GO:0007129;GO:0007283;GO:0010827;GO:0015031;GO:0015629;GO:0016020;GO:0016021;GO:0016032;GO:0016925;GO:0017056;GO:0019083;GO:0031047;GO:0031081;GO:0031965;GO:0051292;GO:0070762;GO:0075733;GO:1900034
20.8985	21.0215	20.51	21.1997	21.4212	19.8251	19.3048	19.7099	19.8497	24.7745	24.8037	25.1586		NaN	NaN	0.00536664	+	3.62707	5.25912	5.29079	O60831;A6NP52;A6NM71	O60831;A6NP52	PRA1 family protein 2	PRAF2				L-glutamate transport [GO:0015813];protein transport [GO:0015031];autophagy [GO:0006914]		endosome membrane [GO:0010008];integral component of membrane [GO:0016021];integral component of membrane [GO:0016021];integral component of membrane [GO:0016021]	GO:0010008;GO:0015031;GO:0015813;GO:0016021;GO:0006914;GO:0016021;GO:0016021
20.2917	21.0023	20.5592	21.5375	21.021	19.9748	18.9306	18.7209	18.96	23.914	24.1447	23.9586		NaN	NaN	0.226681	+	2.94808	4.11805	5.13528	Q96AD5	Q96AD5	Patatin-like phospholipase domain-containing protein 2	PNPLA2	CATALYTIC ACTIVITY: Triacylglycerol + H(2)O = diacylglycerol + a carboxylate.	3.1.1.3	ACT_SITE 47 47 Nucleophile. {ECO:0000255|PROSITE-ProRule:PRU01161}.;ACT_SITE 166 166 Proton acceptor. {ECO:0000255|PROSITE-ProRule:PRU01161}.	acylglycerol acyl-chain remodeling [GO:0036155];lipid homeostasis [GO:0055088];lipid particle organization [GO:0034389];lipid storage [GO:0019915];negative regulation of sequestering of triglyceride [GO:0010891];positive regulation of triglyceride catabolic process [GO:0010898];triglyceride catabolic process [GO:0019433]	acylglycerol O-acyltransferase activity [GO:0016411];lipoprotein lipase activity [GO:0004465];triglyceride lipase activity [GO:0004806]	cytoplasm [GO:0005737];cytosol [GO:0005829];endoplasmic reticulum membrane [GO:0005789];integral component of membrane [GO:0016021];lipid particle [GO:0005811];membrane [GO:0016020];plasma membrane [GO:0005886]	GO:0004465;GO:0004806;GO:0005737;GO:0005789;GO:0005811;GO:0005829;GO:0005886;GO:0010891;GO:0010898;GO:0016020;GO:0016021;GO:0016411;GO:0019433;GO:0019915;GO:0034389;GO:0036155;GO:0055088
20.9018	20.8006	21.5415	21.2485	24.2008	23.2802	18.8149	20.5266	20.8541	24.6255	25.3241	25.2936		NaN	NaN	1.82851	+	4.44007	5.24085	5.01587	Q9Y6K0;A0A0C4DGS9	Q9Y6K0;A0A0C4DGS9	Choline/ethanolaminephosphotransferase 1	CEPT1	CATALYTIC ACTIVITY: CDP-ethanolamine + 1,2-diacyl-sn-glycerol = CMP + a phosphatidylethanolamine. {ECO:0000269|PubMed:10191259}.;CATALYTIC ACTIVITY: CDP-choline + 1,2-diacyl-sn-glycerol = CMP + a phosphatidylcholine. {ECO:0000269|PubMed:10191259}.	2.7.8.1;2.7.8.2		lipid metabolic process [GO:0006629];phosphatidylcholine biosynthetic process [GO:0006656];phosphatidylethanolamine biosynthetic process [GO:0006646];phospholipid biosynthetic process [GO:0008654]	diacylglycerol cholinephosphotransferase activity [GO:0004142];ethanolaminephosphotransferase activity [GO:0004307];metal ion binding [GO:0046872];phosphotransferase activity, for other substituted phosphate groups [GO:0016780]	endoplasmic reticulum membrane [GO:0005789];integral component of membrane [GO:0016021];nuclear membrane [GO:0031965];integral component of membrane [GO:0016021]	GO:0004142;GO:0004307;GO:0005789;GO:0006629;GO:0006646;GO:0006656;GO:0016021;GO:0031965;GO:0046872;GO:0008654;GO:0016021;GO:0016780
22.0729	24.1614	23.172	23.3253	24.4841	23.3811	19.0232	18.6595	20.1727	23.8373	24.562	24.4455		0.368881	0.698041	0.594741	+	3.70821	4.95118	4.99647	E9PKP7;P17480;E9PLT2	E9PKP7;P17480	Nucleolar transcription factor 1	UBTF				positive regulation of transcription from RNA polymerase I promoter [GO:0045943];regulation of transcription from RNA polymerase I promoter [GO:0006356];termination of RNA polymerase I transcription [GO:0006363];transcription elongation from RNA polymerase I promoter [GO:0006362];transcription from RNA polymerase I promoter [GO:0006360];transcription initiation from RNA polymerase I promoter [GO:…	chromatin binding [GO:0003682];poly(A) RNA binding [GO:0044822];RNA polymerase I CORE element sequence-specific DNA binding [GO:0001164];RNA polymerase I upstream control element sequence-specific DNA binding [GO:0001165]	fibrillar center [GO:0001650];nucleolus [GO:0005730];nucleoplasm [GO:0005654];nucleus [GO:0005634];nucleolus [GO:0005730]	GO:0001164;GO:0001165;GO:0001650;GO:0003682;GO:0005634;GO:0005654;GO:0005730;GO:0006356;GO:0006360;GO:0006361;GO:0006362;GO:0006363;GO:0044822;GO:0045943;GO:0005730
20.9059	21.0929	20.6708	20.6584	20.4827	19.7518	19.5918	19.5272	19.6902	24.3179	24.5474	24.3332		NaN	NaN	-0.59226	+	5.11225	4.70292	4.79644	F8W7Q4;Q96A26;E9PH05	F8W7Q4;Q96A26;E9PH05	Protein FAM162A	FAM162A				activation of cysteine-type endopeptidase activity involved in apoptotic process [GO:0006919];cellular response to hypoxia [GO:0071456];neuron apoptotic process [GO:0051402];positive regulation of apoptotic process [GO:0043065];positive regulation of release of cytochrome c from mitochondria [GO:0090200]		cytoplasm [GO:0005737];extracellular exosome [GO:0070062];integral component of membrane [GO:0016021];mitochondrion [GO:0005739];cytoplasm [GO:0005737];integral component of membrane [GO:0016021];mitochondrion [GO:0005739];cytoplasm [GO:0005737];integral component of membrane [GO:0016021];mitochondrion [GO:0005739]	GO:0005737;GO:0005739;GO:0006919;GO:0016021;GO:0043065;GO:0051402;GO:0070062;GO:0071456;GO:0090200;GO:0005737;GO:0005739;GO:0016021;GO:0005737;GO:0005739;GO:0016021
20.4565	21.5888	21.6218	20.9058	21.1658	21.2213	19.6761	19.8193	18.2829	23.889	24.0175	23.8508		NaN	NaN	-0.124729	+	3.85932	4.72258	4.65968	O43615;M0QXU7;M0R301;M0QXM9	O43615;M0QXU7	Mitochondrial import inner membrane translocase subunit TIM44	TIMM44				protein import into mitochondrial matrix [GO:0030150];protein targeting to mitochondrion [GO:0006626]	ATP binding [GO:0005524];chaperone binding [GO:0051087]	mitochondrial inner membrane [GO:0005743];mitochondrial matrix [GO:0005759];mitochondrion [GO:0005739];mitochondrion [GO:0005739]	GO:0005524;GO:0005739;GO:0005743;GO:0005759;GO:0006626;GO:0030150;GO:0051087;GO:0005739
21.3794	21.6428	20.6439	21.3682	20.6814	20.4414	19.2375	20.6126	18.6284	23.9437	23.9623	24.2675		NaN	NaN	-0.391698	+	3.80691	4.52996	4.56501	Q96K37;H7C1I0	Q96K37;H7C1I0	Solute carrier family 35 member E1	SLC35E1				carbohydrate transmembrane transport [GO:0034219]		integral component of membrane [GO:0016021];integral component of membrane [GO:0016021]	GO:0016021;GO:0034219;GO:0016021
20.9799	21.1331	20.875	20.9536	20.8578	23.5142	19.7215	19.5102	18.7347	23.4851	23.6643	23.9029		NaN	NaN	0.779222	+	2.63583	4.11391	4.36198	Q3SXM5;H3BQI7;H3BT52;H3BNH5	Q3SXM5;H3BQI7;H3BT52	Inactive hydroxysteroid dehydrogenase-like protein 1	HSDL1						mitochondrion [GO:0005739]	GO:0005739
24.5574	24.0933	24.3381	24.8791	25.0364	24.9006	19.7317	19.7605	20.3782	24.133	23.868	24.8641		1.88614	0.6091	0.6091	+	3.53773	4.52657	4.33154	P37268;E9PNM1;E9PS69;E9PJG4;E9PQ90;E9PNJ2;E9PSH1	P37268;E9PNM1	Squalene synthase	FDFT1	CATALYTIC ACTIVITY: 2 farnesyl diphosphate + NAD(P)H = squalene + 2 diphosphate + NAD(P)(+).	2.5.1.21		cholesterol biosynthetic process [GO:0006695];ergosterol biosynthetic process [GO:0006696];farnesyl diphosphate metabolic process [GO:0045338];isoprenoid biosynthetic process [GO:0008299];steroid biosynthetic process [GO:0006694];ergosterol biosynthetic process [GO:0006696];biosynthetic process [GO:0009058];biosynthetic process [GO:0009058]	farnesyl-diphosphate farnesyltransferase activity [GO:0004310];oxidoreductase activity [GO:0016491];squalene synthase activity [GO:0051996];farnesyl-diphosphate farnesyltransferase activity [GO:0004310];squalene synthase activity [GO:0051996];transferase activity [GO:0016740];transferase activity [GO:0016740]	endoplasmic reticulum [GO:0005783];endoplasmic reticulum membrane [GO:0005789];integral component of membrane [GO:0016021];endoplasmic reticulum [GO:0005783];integral component of membrane [GO:0016021];endoplasmic reticulum [GO:0005783]	GO:0004310;GO:0005783;GO:0005789;GO:0006694;GO:0006695;GO:0006696;GO:0008299;GO:0016021;GO:0016491;GO:0045338;GO:0051996;GO:0004310;GO:0005783;GO:0006696;GO:0016021;GO:0051996;GO:0009058;GO:0016740;GO:0005783;GO:0009058;GO:0016740
20.7474	21.3606	21.5046	21.0458	19.7128	21.2262	19.27	18.8576	19.3893	23.2661	23.3973	23.7642		NaN	NaN	-0.542609	+	4.70036	3.91235	4.30357	Q56VL3;D6RD77;J3KPI9	Q56VL3	OCIA domain-containing protein 2	OCIAD2						endosome [GO:0005768];mitochondrial inner membrane [GO:0005743]	GO:0005743;GO:0005768
22.2621	20.5799	20.9043	21.4114	20.5969	19.7353	20.3098	19.1885	19.2191	23.606	23.8921	23.9016		NaN	NaN	-0.667548	+	4.63441	4.07902	4.22745	Q9UBV2;G3V3B3	Q9UBV2;G3V3B3	Protein sel-1 homolog 1	SEL1L				endoplasmic reticulum mannose trimming [GO:1904380];ERAD pathway [GO:0036503];ER-associated ubiquitin-dependent protein catabolic process [GO:0030433];Notch signaling pathway [GO:0007219];protein secretion [GO:0009306];protein stabilization [GO:0050821];retrograde protein transport, ER to cytosol [GO:0030970];triglyceride metabolic process [GO:0006641]		Derlin-1 retrotranslocation complex [GO:0036513];endoplasmic reticulum [GO:0005783];endoplasmic reticulum membrane [GO:0005789];endoplasmic reticulum quality control compartment [GO:0044322];Hrd1p ubiquitin ligase complex [GO:0000836];Hrd1p ubiquitin ligase ERAD-L complex [GO:0000839];integral component of membrane [GO:0016021]	GO:0000836;GO:0000839;GO:0005783;GO:0005789;GO:0006641;GO:0007219;GO:0009306;GO:0016021;GO:0030433;GO:0030970;GO:0036503;GO:0036513;GO:0044322;GO:0050821;GO:1904380
24.4733	24.2765	25.0457	24.4158	24.1296	23.4012	20.0016	19.1857	18.9516	23.7996	23.6966	23.1042		0.744236	-0.616301	-0.616301	+	3.57654	2.88465	4.15385	I3L3P7;P62244;I3L246;H3BN98;H3BV27;H3BT37;I3L303;H3BVC7	I3L3P7;P62244;I3L246;H3BN98	40S ribosomal protein S15a	RPS15A				nuclear-transcribed mRNA catabolic process, nonsense-mediated decay [GO:0000184];positive regulation of cell cycle [GO:0045787];positive regulation of cell proliferation [GO:0008284];response to virus [GO:0009615];rRNA processing [GO:0006364];SRP-dependent cotranslational protein targeting to membrane [GO:0006614];translation [GO:0006412];translational initiation [GO:0006413];viral transcription …	poly(A) RNA binding [GO:0044822];RNA binding [GO:0003723];structural constituent of ribosome [GO:0003735];structural constituent of ribosome [GO:0003735];structural constituent of ribosome [GO:0003735];structural constituent of ribosome [GO:0003735];structural constituent of ribosome [GO:0003735];structural constituent of ribosome [GO:0003735];structural constituent of ribosome [GO:0003735];struc…	cytoplasm [GO:0005737];cytosol [GO:0005829];cytosolic small ribosomal subunit [GO:0022627];extracellular exosome [GO:0070062];extracellular matrix [GO:0031012];membrane [GO:0016020];mitochondrion [GO:0005739];nucleoplasm [GO:0005654];ribosome [GO:0005840];ribosome [GO:0005840];integral component of membrane [GO:0016021];ribosome [GO:0005840];Sec61 translocon complex [GO:0005784];ribosome [GO:0005…	GO:0000184;GO:0003723;GO:0003735;GO:0005654;GO:0005737;GO:0005739;GO:0005829;GO:0006364;GO:0006412;GO:0006413;GO:0006614;GO:0008284;GO:0009615;GO:0016020;GO:0019083;GO:0022627;GO:0031012;GO:0044822;GO:0045787;GO:0070062;GO:0003735;GO:0005840;GO:0006412;GO:0003735;GO:0005840;GO:0006412;GO:0003735;GO:0005784;GO:0005840;GO:0006412;GO:0006613;GO:0016021;GO:0003735;GO:0005840;GO:0006412;GO:0003735;GO:…
20.0611	21.6348	20.251	21.3287	20.2924	21.0003	19.4663	18.9877	18.9691	22.8373	23.0282	23.1681		NaN	NaN	0.224832	+	3.98745	3.52186	3.87017	Q07065	Q07065	Cytoskeleton-associated protein 4	CKAP4				cellular protein metabolic process [GO:0044267]	poly(A) RNA binding [GO:0044822]	cytoskeleton [GO:0005856];endoplasmic reticulum [GO:0005783];endoplasmic reticulum membrane [GO:0005789];extracellular exosome [GO:0070062];extracellular matrix [GO:0031012];integral component of membrane [GO:0016021];lamellar body [GO:0042599];lipid particle [GO:0005811];membrane [GO:0016020];perinuclear region of cytoplasm [GO:0048471];plasma membrane [GO:0005886]	GO:0005783;GO:0005789;GO:0005811;GO:0005856;GO:0005886;GO:0016020;GO:0016021;GO:0031012;GO:0042599;GO:0044267;GO:0044822;GO:0048471;GO:0070062
21.7604	21.5921	21.0767	20.6616	21.2291	20.6822	20.1439	18.8512	20.1829	23.6192	23.478	23.6271		NaN	NaN	-0.618775	+	5.09418	4.21125	3.84876	Q9NX40;D6R918;D6RBC5;D6RDI5;D6RA54;D6RC55;D6RG39;D6RIT9;D6RDK6;D6RBN5;D6RF07	Q9NX40;D6R918;D6RBC5;D6RDI5;D6RA54;D6RC55;D6RG39;D6RIT9;D6RDK6;D6RBN5	OCIA domain-containing protein 1	OCIAD1						endosome [GO:0005768];membrane [GO:0016020];mitochondrion [GO:0005739]	GO:0005739;GO:0005768;GO:0016020
19.5598	21.2586	19.9107	21.0295	20.6344	20.2045	18.657	19.4604	19.6797	22.9091	23.2334	23.165		NaN	NaN	0.379777	+	5.04566	3.73827	3.83681	Q9H2D1	Q9H2D1	Mitochondrial folate transporter/carrier	SLC25A32				folic acid import into mitochondrion [GO:1904947];folic acid metabolic process [GO:0046655];folic acid transport [GO:0015884];glycine metabolic process [GO:0006544]	folic acid transporter activity [GO:0008517]	integral component of membrane [GO:0016021];mitochondrial inner membrane [GO:0005743];mitochondrion [GO:0005739]	GO:0005739;GO:0005743;GO:0006544;GO:0008517;GO:0015884;GO:0016021;GO:0046655;GO:1904947
20.8869	21.2639	20.6146	21.3043	19.9597	20.0306	19.1601	19.8816	20.069	23.6158	23.3173	23.5348		NaN	NaN	-0.490239	+	4.80145	3.72496	3.78572	B5MDE0;Q96AA3;C9JP01	B5MDE0;Q96AA3	Protein RFT1 homolog	RFT1				carbohydrate transport [GO:0008643];glycolipid translocation [GO:0034203]	lipid transporter activity [GO:0005319];lipid transporter activity [GO:0005319];lipid transporter activity [GO:0005319]	endoplasmic reticulum membrane [GO:0005789];integral component of membrane [GO:0016021];integral component of membrane [GO:0016021];integral component of membrane [GO:0016021]	GO:0005319;GO:0005789;GO:0008643;GO:0016021;GO:0034203;GO:0005319;GO:0016021;GO:0005319;GO:0016021
20.5538	20.4458	21.6633	21.587	20.4661	19.8573	20.0936	18.9298	20.0572	23.3885	23.536	23.4659		NaN	NaN	-0.25082	+	3.74122	3.71643	3.76996	Q8TEQ8	Q8TEQ8	GPI ethanolamine phosphate transferase 3	PIGO		2.-.-.-		GPI anchor biosynthetic process [GO:0006506]	mannose-ethanolamine phosphotransferase activity [GO:0051377]	endoplasmic reticulum membrane [GO:0005789];integral component of membrane [GO:0016021];membrane [GO:0016020]	GO:0005789;GO:0006506;GO:0016020;GO:0016021;GO:0051377
21.155	20.7414	20.4737	21.7157	21.2512	20.5122	18.6636	18.966	19.738	22.7407	22.7853	22.9842		NaN	NaN	0.369693	+	2.05266	3.32612	3.71421	Q96IX5	Q96IX5	Up-regulated during skeletal muscle growth protein 5	USMG5						extracellular exosome [GO:0070062];integral component of membrane [GO:0016021];mitochondrial proton-transporting ATP synthase complex [GO:0005753];mitochondrion [GO:0005739]	GO:0005739;GO:0005753;GO:0016021;GO:0070062
21.553	20.9442	20.906	20.7374	20.4221	20.7287	21.417	21.1301	19.2597	24.3955	24.5392	23.9781		NaN	NaN	-0.505034	+	2.13985	3.74964	3.702	Q9NVH1;B1AK20;Q5TH61	Q9NVH1	DnaJ homolog subfamily C member 11	DNAJC11						extracellular exosome [GO:0070062];mitochondrial inner membrane [GO:0005743];mitochondrion [GO:0005739]	GO:0005739;GO:0005743;GO:0070062
20.8771	21.835	19.8748	22.3169	19.5616	20.1797	18.4819	19.7289	20.0239	22.9701	22.9566	23.3701		NaN	NaN	-0.176208	+	2.67548	3.08538	3.68738	F8W8C2;Q9HBM0;F2Z3A6	F8W8C2;Q9HBM0;F2Z3A6	Vezatin	VEZT				single organismal cell-cell adhesion [GO:0016337];single organismal cell-cell adhesion [GO:0016337];single organismal cell-cell adhesion [GO:0016337]		acrosomal vesicle [GO:0001669];adherens junction [GO:0005912];cytoplasm [GO:0005737];integral component of membrane [GO:0016021];nucleoplasm [GO:0005654];plasma membrane [GO:0005886];cytoplasm [GO:0005737];integral component of membrane [GO:0016021];nucleoplasm [GO:0005654];integral component of membrane [GO:0016021]	GO:0001669;GO:0005654;GO:0005737;GO:0005886;GO:0005912;GO:0016021;GO:0016337;GO:0005654;GO:0005737;GO:0016021;GO:0016337;GO:0016021;GO:0016337
20.5321	20.7159	21.1807	20.6598	20.9768	20.6114	19.5935	19.8667	20.1921	23.0939	23.9018	23.7088		NaN	NaN	-0.0602182	+	2.56245	4.03992	3.68408	P61224;F5H6R7;F5H004;F5GX62;E7ESV4;A0A0J9YXB3;F5H7Y6;A6NIZ1;P62834;F5H4H0;F5GYH7;F5H077;F5GWU8;F5H491;F5H0B7;F5H500;F5H823;B7ZB78;F5GZG1;A0A075B6Q0;F5GYB5;F8WBC0	P61224;F5H6R7;F5H004;F5GX62;E7ESV4;A0A0J9YXB3;F5H7Y6;A6NIZ1;P62834;F5H4H0;F5GYH7;F5H077;F5GWU8;F5H491;F5H0B7;F5H500;F5H823;B7ZB78;F5GZG1;A0A075B6Q0;F5GYB5	Ras-related protein Rap-1b;Ras-related protein Rap-1b-like protein;Ras-related protein Rap-1A	RAP1B;RAP1A				activation of MAPKK activity [GO:0000186];cellular response to cAMP [GO:0071320];cellular response to drug [GO:0035690];cellular response to glucose stimulus [GO:0071333];cellular response to nerve growth factor stimulus [GO:1990090];establishment of endothelial barrier [GO:0061028];liver regeneration [GO:0097421];negative regulation of collagen biosynthetic process [GO:0032966];negative regulati…	GTPase activity [GO:0003924];GTP binding [GO:0005525];protein complex binding [GO:0032403];protein transporter activity [GO:0008565];Rap guanyl-nucleotide exchange factor activity [GO:0017034];GDP binding [GO:0019003];GTPase activity [GO:0003924];GTP binding [GO:0005525];protein complex binding [GO:0032403];GTP binding [GO:0005525];GTP binding [GO:0005525];GTP binding [GO:0005525];GTP binding [GO…	cell junction [GO:0030054];cytoplasm [GO:0005737];cytosol [GO:0005829];early endosome [GO:0005769];extracellular exosome [GO:0070062];guanyl-nucleotide exchange factor complex [GO:0032045];late endosome [GO:0005770];myelin sheath [GO:0043209];neuron projection [GO:0043005];perinuclear region of cytoplasm [GO:0048471];plasma membrane [GO:0005886];cell-cell junction [GO:0005911];cytosol [GO:0005829…	GO:0000186;GO:0003924;GO:0005525;GO:0005737;GO:0005769;GO:0005770;GO:0005829;GO:0005886;GO:0007165;GO:0008565;GO:0010976;GO:0015031;GO:0017034;GO:0030054;GO:0032045;GO:0032403;GO:0032486;GO:0032966;GO:0035690;GO:0038180;GO:0043005;GO:0043209;GO:0043547;GO:0045860;GO:0046326;GO:0048471;GO:0050766;GO:0050796;GO:0061028;GO:0070062;GO:0070374;GO:0071320;GO:0071333;GO:0097327;GO:0097421;GO:1901888;GO:…
20.7439	20.6368	21.206	19.848	20.1419	20.2474	19.5409	20.8096	18.6684	23.1751	23.3105	23.4068		NaN	NaN	-0.783115	+	2.0106	3.26717	3.62451	O95831;E9PMA0;E9PRR0;E9PMQ8	O95831	Apoptosis-inducing factor 1, mitochondrial	AIFM1		1.1.1.-		activation of cysteine-type endopeptidase activity involved in apoptotic process [GO:0006919];apoptotic process [GO:0006915];cell redox homeostasis [GO:0045454];cellular response to aldosterone [GO:1904045];cellular response to estradiol stimulus [GO:0071392];cellular response to hydrogen peroxide [GO:0070301];cellular response to nitric oxide [GO:0071732];cellular response to oxygen-glucose depr…	DNA binding [GO:0003677];electron carrier activity [GO:0009055];FAD binding [GO:0071949];NAD(P)H oxidase activity [GO:0016174];oxidoreductase activity, acting on NAD(P)H [GO:0016651];flavin adenine dinucleotide binding [GO:0050660];oxidoreductase activity [GO:0016491]	cytosol [GO:0005829];mitochondrial inner membrane [GO:0005743];mitochondrial intermembrane space [GO:0005758];mitochondrion [GO:0005739];nucleus [GO:0005634];perinuclear region of cytoplasm [GO:0048471];cell [GO:0005623]	GO:0002931;GO:0003677;GO:0005634;GO:0005739;GO:0005743;GO:0005758;GO:0005829;GO:0006308;GO:0006915;GO:0006919;GO:0009055;GO:0009636;GO:0016174;GO:0016651;GO:0030182;GO:0030261;GO:0032981;GO:0043065;GO:0043525;GO:0045454;GO:0048471;GO:0051402;GO:0070059;GO:0070301;GO:0071392;GO:0071732;GO:0071949;GO:0090650;GO:1902065;GO:1902510;GO:1904045;GO:0005623;GO:0016491;GO:0045454;GO:0050660
20.91	20.9479	20.925	21.3273	19.7694	21.8415	19.5319	19.5652	20.6105	23.3344	23.6924	23.4789		NaN	NaN	0.0517667	+	2.24798	3.31328	3.59937	A0A087WW65;O75027;B4DGL8	A0A087WW65;O75027;B4DGL8	ATP-binding cassette sub-family B member 7, mitochondrial	ABCB7				cellular iron ion homeostasis [GO:0006879];transmembrane transport [GO:0055085];transport [GO:0006810]	ATPase activity, coupled to transmembrane movement of substances [GO:0042626];ATP binding [GO:0005524];heme transporter activity [GO:0015232];ATPase activity, coupled to transmembrane movement of substances [GO:0042626];ATP binding [GO:0005524];ATPase activity, coupled to transmembrane movement of substances [GO:0042626];ATP binding [GO:0005524]	integral component of membrane [GO:0016021];mitochondrial inner membrane [GO:0005743];mitochondrion [GO:0005739];integral component of membrane [GO:0016021];mitochondrion [GO:0005739];integral component of membrane [GO:0016021]	GO:0005524;GO:0005739;GO:0005743;GO:0006810;GO:0006879;GO:0015232;GO:0016021;GO:0042626;GO:0055085;GO:0005524;GO:0005739;GO:0016021;GO:0042626;GO:0005524;GO:0016021;GO:0042626
20.246	21.1763	20.1487	21.1949	20.7389	21.129	19.0394	19.0431	19.8659	22.8631	22.9045	22.7581		NaN	NaN	0.497299	+	3.23866	2.62539	3.52573	P12236	P12236	ADP/ATP translocase 3;ADP/ATP translocase 3, N-terminally processed	SLC25A6				active induction of host immune response by virus [GO:0046732];apoptotic process [GO:0006915];protein targeting to mitochondrion [GO:0006626];regulation of insulin secretion [GO:0050796]	adenine transmembrane transporter activity [GO:0015207];ATP:ADP antiporter activity [GO:0005471]	extracellular matrix [GO:0031012];integral component of membrane [GO:0016021];mitochondrial inner membrane [GO:0005743];mitochondrial inner membrane presequence translocase complex [GO:0005744];mitochondrion [GO:0005739];nucleus [GO:0005634]	GO:0005471;GO:0005634;GO:0005739;GO:0005743;GO:0005744;GO:0006626;GO:0006915;GO:0015207;GO:0016021;GO:0031012;GO:0046732;GO:0050796
20.4449	20.6829	20.8106	21.3316	21.2247	21.6661	19.2564	19.3372	18.9484	22.7371	22.7197	22.5848		NaN	NaN	0.761325	+	3.88173	2.79056	3.49988	Q9NUQ2;H0YC22;E5RH21	Q9NUQ2	1-acyl-sn-glycerol-3-phosphate acyltransferase epsilon	AGPAT5	CATALYTIC ACTIVITY: Acyl-CoA + 1-acyl-sn-glycerol 3-phosphate = CoA + 1,2-diacyl-sn-glycerol 3-phosphate.	2.3.1.51		CDP-diacylglycerol biosynthetic process [GO:0016024];hematopoietic progenitor cell differentiation [GO:0002244];phosphatidic acid biosynthetic process [GO:0006654];phospholipid biosynthetic process [GO:0008654];triglyceride biosynthetic process [GO:0019432]	1-acylglycerol-3-phosphate O-acyltransferase activity [GO:0003841]	endoplasmic reticulum membrane [GO:0005789];integral component of membrane [GO:0016021];mitochondrial outer membrane [GO:0005741];mitochondrion [GO:0005739];nuclear envelope [GO:0005635];integral component of membrane [GO:0016021];integral component of membrane [GO:0016021]	GO:0002244;GO:0003841;GO:0005635;GO:0005739;GO:0005741;GO:0005789;GO:0006654;GO:0008654;GO:0016021;GO:0016024;GO:0019432;GO:0016021;GO:0016021
20.8559	21.7191	20.5509	21.314	21.5067	20.7965	18.6212	18.739	19.7814	22.2363	22.7385	22.6659		NaN	NaN	0.163773	+	3.25442	2.54392	3.4997	Q9NUQ9;A0A087X178;E5RK61;E5RFS4;E5RHU5;E5RGI7;E5RJE1;E5RIR8;E5RJL8;E5RI16;Q9H0Q0	Q9NUQ9	Protein FAM49B	FAM49B						intracellular [GO:0005622];cilium [GO:0005929];extracellular exosome [GO:0070062];membrane [GO:0016020]	GO:0005622;GO:0005929;GO:0016020;GO:0070062
20.7572	20.8106	20.5666	23.0849	22.9748	22.0423	19.7215	19.0521	19.6437	22.9055	23.0756	22.8563		1.69658	1.75457	1.98921	+	4.22285	3.19886	3.47333	O94919	O94919	Endonuclease domain-containing 1 protein	ENDOD1		3.1.30.-			endonuclease activity [GO:0004519];metal ion binding [GO:0046872];nucleic acid binding [GO:0003676]	extracellular exosome [GO:0070062];membrane [GO:0016020]	GO:0003676;GO:0004519;GO:0016020;GO:0046872;GO:0070062
21.1441	21.6469	21.3289	21.2146	20.5859	21.3716	19.0053	21.1505	19.0937	23.1607	23.2244	23.2424		NaN	NaN	-0.315903	+	3.72786	3.20876	3.45935	Q08722	Q08722	Leukocyte surface antigen CD47	CD47				cell adhesion [GO:0007155];extracellular matrix organization [GO:0030198];integrin-mediated signaling pathway [GO:0007229];leukocyte migration [GO:0050900];opsonization [GO:0008228];positive regulation of cell-cell adhesion [GO:0022409];positive regulation of cell proliferation [GO:0008284];positive regulation of inflammatory response [GO:0050729];positive regulation of phagocytosis [GO:0050766];…	thrombospondin receptor activity [GO:0070053]	extracellular exosome [GO:0070062];integral component of plasma membrane [GO:0005887];plasma membrane [GO:0005886]	GO:0005886;GO:0005887;GO:0007155;GO:0007229;GO:0008228;GO:0008284;GO:0009617;GO:0022409;GO:0030198;GO:0050729;GO:0050766;GO:0050870;GO:0050900;GO:0070053;GO:0070062
22.9909	22.5222	22.4699	22.8587	23.0394	23.1334	18.7372	18.9974	20.2166	22.5671	22.9156	22.6483		0.883898	0.3495	0.3495	+	2.74479	3.41768	3.39326	Q13435;E9PPJ0;E9PJ04;H0YCG1;E9PJT3;H0YEX5;E9PIL8	Q13435;E9PPJ0	Splicing factor 3B subunit 2	SF3B2				mRNA processing [GO:0006397];mRNA splicing, via spliceosome [GO:0000398];RNA splicing [GO:0008380];viral process [GO:0016032]	poly(A) RNA binding [GO:0044822]	catalytic step 2 spliceosome [GO:0071013];nucleoplasm [GO:0005654];precatalytic spliceosome [GO:0071011];spliceosomal complex [GO:0005681];U12-type spliceosomal complex [GO:0005689];U2 snRNP [GO:0005686];U2-type spliceosomal complex [GO:0005684];nucleoplasm [GO:0005654]	GO:0000398;GO:0005654;GO:0005681;GO:0005684;GO:0005686;GO:0005689;GO:0006397;GO:0008380;GO:0016032;GO:0044822;GO:0071011;GO:0071013;GO:0005654
22.9806	20.9399	20.6671	22.7444	19.5639	21.0418	19.1458	19.3689	20.1108	22.9156	22.9734	22.9116		NaN	NaN	-0.412492	+	3.89984	3.17559	3.3917	B1AH77;B1AH80;P15153;B1AH78	B1AH77;B1AH80;P15153;B1AH78	Ras-related C3 botulinum toxin substrate 2	RAC2				actin filament organization [GO:0007015];bone resorption [GO:0045453];cell projection assembly [GO:0030031];chemotaxis [GO:0006935];G-protein coupled receptor signaling pathway [GO:0007186];lymphocyte aggregation [GO:0071593];platelet activation [GO:0030168];positive regulation of cell proliferation [GO:0008284];positive regulation of lamellipodium assembly [GO:0010592];positive regulation of neu…	GTPase activity [GO:0003924];GTP binding [GO:0005525];protein kinase regulator activity [GO:0019887];GTP binding [GO:0005525];GTP binding [GO:0005525];GTP binding [GO:0005525]	cytosol [GO:0005829];extracellular exosome [GO:0070062];focal adhesion [GO:0005925];lamellipodium [GO:0030027];nuclear envelope [GO:0005635];phagocytic vesicle membrane [GO:0030670];plasma membrane [GO:0005886];intracellular [GO:0005622];intracellular [GO:0005622];intracellular [GO:0005622]	GO:0003924;GO:0005525;GO:0005635;GO:0005829;GO:0005886;GO:0005925;GO:0006935;GO:0007015;GO:0007165;GO:0007186;GO:0007264;GO:0008284;GO:0010310;GO:0010592;GO:0010810;GO:0019887;GO:0030027;GO:0030031;GO:0030168;GO:0030670;GO:0042129;GO:0043304;GO:0045453;GO:0051056;GO:0060263;GO:0060753;GO:0070062;GO:0071593;GO:0090023;GO:1902622;GO:1903955;GO:0005525;GO:0005622;GO:0007264;GO:0005525;GO:0005622;GO:…
20.0613	20.1174	21.7947	22.1586	20.1212	21.5225	19.7838	20.4171	19.9796	23.2544	23.3603	23.654		NaN	NaN	0.609635	+	3.55737	3.77439	3.36273	Q9Y3A6;B1AKT3;M0R072	Q9Y3A6;B1AKT3	Transmembrane emp24 domain-containing protein 5	TMED5				Golgi ribbon formation [GO:0090161];protein transport [GO:0015031];transport [GO:0006810];transport [GO:0006810]		cis-Golgi network [GO:0005801];endoplasmic reticulum exit site [GO:0070971];endoplasmic reticulum-Golgi intermediate compartment [GO:0005793];endoplasmic reticulum-Golgi intermediate compartment membrane [GO:0033116];endoplasmic reticulum membrane [GO:0005789];Golgi apparatus [GO:0005794];integral component of membrane [GO:0016021];integral component of membrane [GO:0016021];integral component of…	GO:0005789;GO:0005793;GO:0005794;GO:0005801;GO:0015031;GO:0016021;GO:0033116;GO:0070971;GO:0090161;GO:0006810;GO:0016021;GO:0006810;GO:0016021
21.3016	21.2114	19.6917	21.1514	20.3488	20.6967	19.1254	19.8235	20.1576	22.8349	23.1992	23.1006		NaN	NaN	-0.00260862	+	3.21421	3.6397	3.34275	H7BXF4;B1PBA3;Q9NXE4;H7C0W5;H7C1Q6;H7C235;H7C2J2;C9J647;F8WF03;F2Z2I0;F2Z2W5;H7C2E2	H7BXF4;B1PBA3;Q9NXE4;H7C0W5;H7C1Q6	Sphingomyelin phosphodiesterase 4	SMPD4	CATALYTIC ACTIVITY: Sphingomyelin + H(2)O = N-acylsphingosine + phosphocholine.	3.1.4.12		cellular response to tumor necrosis factor [GO:0071356];ceramide biosynthetic process [GO:0046513];glycerophospholipid catabolic process [GO:0046475];glycosphingolipid metabolic process [GO:0006687];sphingomyelin catabolic process [GO:0006685]	metal ion binding [GO:0046872];sphingomyelin phosphodiesterase activity [GO:0004767];sphingomyelin phosphodiesterase D activity [GO:0050290];sphingomyelin phosphodiesterase D activity [GO:0050290];sphingomyelin phosphodiesterase D activity [GO:0050290];sphingomyelin phosphodiesterase D activity [GO:0050290];sphingomyelin phosphodiesterase D activity [GO:0050290];sphingomyelin phosphodiesterase D …	endoplasmic reticulum [GO:0005783];endoplasmic reticulum membrane [GO:0005789];Golgi apparatus [GO:0005794];Golgi membrane [GO:0000139];integral component of membrane [GO:0016021];trans-Golgi network [GO:0005802];integral component of membrane [GO:0016021];integral component of membrane [GO:0016021];integral component of membrane [GO:0016021]	GO:0000139;GO:0004767;GO:0005783;GO:0005789;GO:0005794;GO:0005802;GO:0006685;GO:0006687;GO:0016021;GO:0046475;GO:0046513;GO:0046872;GO:0050290;GO:0071356;GO:0016021;GO:0050290;GO:0050290;GO:0050290;GO:0050290;GO:0050290;GO:0050290;GO:0050290;GO:0050290;GO:0016021;GO:0050290;GO:0050290;GO:0016021;GO:0050290
21.3795	20.6565	20.5693	19.8457	20.7496	20.2888	19.6346	20.5897	19.5563	23.3672	23.2017	23.2076		NaN	NaN	-0.573717	+	5.84583	3.41527	3.33195	O14672	O14672	Disintegrin and metalloproteinase domain-containing protein 10	ADAM10	CATALYTIC ACTIVITY: Endopeptidase of broad specificity.	3.4.24.81	ACT_SITE 384 384	cell-cell signaling [GO:0007267];constitutive protein ectodomain proteolysis [GO:0051089];ephrin receptor signaling pathway [GO:0048013];extracellular matrix disassembly [GO:0022617];integrin-mediated signaling pathway [GO:0007229];in utero embryonic development [GO:0001701];membrane protein ectodomain proteolysis [GO:0006509];monocyte activation [GO:0042117];negative regulation of cell adhesion …	endopeptidase activity [GO:0004175];integrin binding [GO:0005178];metal ion binding [GO:0046872];metalloendopeptidase activity [GO:0004222];metallopeptidase activity [GO:0008237];protein homodimerization activity [GO:0042803];protein kinase binding [GO:0019901];receptor binding [GO:0005102]	cell surface [GO:0009986];cytoplasm [GO:0005737];extracellular exosome [GO:0070062];focal adhesion [GO:0005925];Golgi apparatus [GO:0005794];Golgi-associated vesicle [GO:0005798];Golgi membrane [GO:0000139];integral component of membrane [GO:0016021];intracellular membrane-bounded organelle [GO:0043231];membrane [GO:0016020];nucleus [GO:0005634];perinuclear endoplasmic reticulum [GO:0097038];plas…	GO:0000139;GO:0001701;GO:0004175;GO:0004222;GO:0005102;GO:0005178;GO:0005634;GO:0005737;GO:0005794;GO:0005798;GO:0005886;GO:0005925;GO:0006468;GO:0006509;GO:0007162;GO:0007219;GO:0007220;GO:0007229;GO:0007267;GO:0008237;GO:0008284;GO:0009986;GO:0010820;GO:0014069;GO:0016020;GO:0016021;GO:0016485;GO:0019901;GO:0022617;GO:0030307;GO:0030335;GO:0034612;GO:0042117;GO:0042803;GO:0043231;GO:0046872;GO:…
20.648	22.5021	21.595	21.147	20.7964	19.8199	19.6472	19.9726	19.4513	22.8692	23.0844	23.0341		NaN	NaN	-0.993893	+	3.51547	3.33945	3.30554	H0Y8C3;Q9NZJ7	H0Y8C3;Q9NZJ7	Mitochondrial carrier homolog 1	MTCH1				activation of cysteine-type endopeptidase activity involved in apoptotic process [GO:0006919];apoptotic process [GO:0006915];neuronal ion channel clustering [GO:0045161];positive regulation of apoptotic process [GO:0043065];regulation of signal transduction [GO:0009966];transport [GO:0006810];transport [GO:0006810]		integral component of membrane [GO:0016021];intracellular [GO:0005622];membrane [GO:0016020];mitochondrial inner membrane [GO:0005743];mitochondrion [GO:0005739];integral component of membrane [GO:0016021]	GO:0005622;GO:0005739;GO:0005743;GO:0006810;GO:0006915;GO:0006919;GO:0009966;GO:0016020;GO:0016021;GO:0043065;GO:0045161;GO:0006810;GO:0016021
21.1872	20.0117	20.213	20.9928	22.7384	20.395	20.6098	18.6253	20.4209	23.1791	23.2804	23.0967		NaN	NaN	0.904754	+	3.43723	3.45615	3.30006	O95202	O95202	LETM1 and EF-hand domain-containing protein 1, mitochondrial	LETM1				cellular metal ion homeostasis [GO:0006875];cristae formation [GO:0042407]	calcium ion binding [GO:0005509];ribosome binding [GO:0043022]	integral component of membrane [GO:0016021];mitochondrial inner membrane [GO:0005743];mitochondrion [GO:0005739]	GO:0005509;GO:0005739;GO:0005743;GO:0006875;GO:0016021;GO:0042407;GO:0043022
20.3605	20.4859	20.5962	21.6902	21.9723	21.9356	20.5886	19.6277	19.9305	23.3691	23.4011	23.2442		NaN	NaN	1.38515	+	3.43077	4.4489	3.2892	G5E9Z2;Q96KA5	G5E9Z2;Q96KA5	Cleft lip and palate transmembrane protein 1-like protein	CLPTM1L				apoptotic process [GO:0006915];apoptotic process [GO:0006915]		integral component of membrane [GO:0016021];membrane [GO:0016020];integral component of membrane [GO:0016021]	GO:0006915;GO:0016020;GO:0016021;GO:0006915;GO:0016021
21.7894	21.4355	20.746	21.3127	20.7145	21.6194	20.8773	21.2404	21.2741	24.2432	24.4555	24.5238		NaN	NaN	-0.108102	+	4.55613	3.27687	3.2769	A0A0G2JKZ1;A2AB90;A0A0G2JH37;A0A0A0MSV9;O15533;Q6P1N7;C9JA35;A0A0A0MT98	A0A0G2JKZ1;A2AB90;A0A0G2JH37;A0A0A0MSV9;O15533;Q6P1N7;C9JA35;A0A0A0MT98	Tapasin	TAPBP				antigen processing and presentation of endogenous peptide antigen via MHC class I [GO:0019885];antigen processing and presentation of peptide antigen via MHC class I [GO:0002474];immune response [GO:0006955];peptide antigen stabilization [GO:0050823];protein complex assembly [GO:0006461];regulation of gene expression [GO:0010468];regulation of protein complex stability [GO:0061635];retrograde ves…	MHC class I protein binding [GO:0042288];peptide antigen binding [GO:0042605];peptide antigen-transporting ATPase activity [GO:0015433];TAP1 binding [GO:0046978];TAP2 binding [GO:0046979];unfolded protein binding [GO:0051082]	endoplasmic reticulum [GO:0005783];endoplasmic reticulum membrane [GO:0005789];Golgi membrane [GO:0000139];integral component of lumenal side of endoplasmic reticulum membrane [GO:0071556];integral component of membrane [GO:0016021];MHC class I peptide loading complex [GO:0042824];integral component of membrane [GO:0016021];MHC class I peptide loading complex [GO:0042824];integral component of me…	GO:0000139;GO:0002474;GO:0005783;GO:0005789;GO:0006461;GO:0006890;GO:0006955;GO:0010468;GO:0015433;GO:0016021;GO:0019885;GO:0042288;GO:0042605;GO:0042824;GO:0046978;GO:0046979;GO:0050823;GO:0051082;GO:0061635;GO:0071556;GO:0016021;GO:0019885;GO:0002397;GO:0019885;GO:0042824;GO:0016021;GO:0019885;GO:0016021;GO:0019885;GO:0016021;GO:0016020;GO:0019885
21.8493	21.5778	19.8611	21.7381	19.1292	20.1313	19.367	20.1716	18.9072	22.591	22.7675	22.8437		NaN	NaN	-0.763193	+	1.84576	2.93106	3.25214	I3L1P8;Q02978	I3L1P8;Q02978	Mitochondrial 2-oxoglutarate/malate carrier protein	SLC25A11				gluconeogenesis [GO:0006094];glucose metabolic process [GO:0006006];transport [GO:0006810];transport [GO:0006810]	oxoglutarate:malate antiporter activity [GO:0015367];poly(A) RNA binding [GO:0044822]	integral component of plasma membrane [GO:0005887];mitochondrial inner membrane [GO:0005743];mitochondrion [GO:0005739];nucleus [GO:0005634];integral component of membrane [GO:0016021]	GO:0005634;GO:0005739;GO:0005743;GO:0005887;GO:0006006;GO:0006094;GO:0006810;GO:0015367;GO:0044822;GO:0006810;GO:0016021
20.7889	21.1797	21.5505	20.468	20.2114	19.9633	21.551	20.0258	19.7906	23.6422	23.8078	23.671		NaN	NaN	-0.958822	+	2.8987	4.19821	3.25117	Q92685;H7C0X4;C9J7S5;F8WF93;H7BZZ2;F8WE30	Q92685;H7C0X4;C9J7S5	Dol-P-Man:Man(5)GlcNAc(2)-PP-Dol alpha-1,3-mannosyltransferase	ALG3	CATALYTIC ACTIVITY: Dolichyl beta-D-mannosyl phosphate + D-Man-alpha-(1->2)-D-Man-alpha-(1->2)-D-Man-alpha-(1->3)-(D-Man-alpha-(1->6))-D-Man-beta-(1->4)-D-GlcNAc-beta-(1->4)-D-GlcNAc-diphosphodolichol = D-Man-alpha-(1->2)-D-Man-alpha-(1->2)-D-Man-alpha-(1->3)-(D-Man-alpha-(1->3)-D-Man-alpha-(1->6))-D-Man-beta-(1->4)-D-GlcNAc-beta-(1->4)-D-GlcNAc-diphosphodolichol + dolichyl phosphate.	2.4.1.258		dolichol-linked oligosaccharide biosynthetic process [GO:0006488];protein glycosylation [GO:0006486]	alpha-1,3-mannosyltransferase activity [GO:0000033];dol-P-Man:Man(5)GlcNAc(2)-PP-Dol alpha-1,3-mannosyltransferase activity [GO:0052925];transferase activity, transferring hexosyl groups [GO:0016758];transferase activity, transferring hexosyl groups [GO:0016758];transferase activity, transferring hexosyl groups [GO:0016758];transferase activity, transferring hexosyl groups [GO:0016758]	endoplasmic reticulum membrane [GO:0005789];integral component of membrane [GO:0016021];endoplasmic reticulum [GO:0005783];integral component of membrane [GO:0016021];endoplasmic reticulum [GO:0005783];integral component of membrane [GO:0016021];endoplasmic reticulum [GO:0005783];integral component of membrane [GO:0016021];endoplasmic reticulum [GO:0005783];integral component of membrane [GO:0016…	GO:0000033;GO:0005789;GO:0006486;GO:0006488;GO:0016021;GO:0052925;GO:0005783;GO:0016021;GO:0016758;GO:0005783;GO:0016021;GO:0016758;GO:0005783;GO:0016021;GO:0016758;GO:0005783;GO:0016021;GO:0016758
20.382	21.0412	20.6182	22.1529	20.7754	21.2739	20.2532	17.644	19.0868	22.2929	22.3627	22.0007		NaN	NaN	0.720282	+	3.00088	1.73384	3.22412	P25788;G3V4X5	P25788;G3V4X5	Proteasome subunit alpha type-3	PSMA3	CATALYTIC ACTIVITY: Cleavage of peptide bonds with very broad specificity. {ECO:0000255|PROSITE-ProRule:PRU00808}.;CATALYTIC ACTIVITY: Cleavage of peptide bonds with very broad specificity. {ECO:0000256|PROSITE-ProRule:PRU00808}.	3.4.25.1;3.4.25.1		anaphase-promoting complex-dependent catabolic process [GO:0031145];antigen processing and presentation of exogenous peptide antigen via MHC class I, TAP-dependent [GO:0002479];Fc-epsilon receptor signaling pathway [GO:0038095];MAPK cascade [GO:0000165];negative regulation of canonical Wnt signaling pathway [GO:0090090];negative regulation of ubiquitin-protein ligase activity involved in mitotic …	threonine-type endopeptidase activity [GO:0004298];threonine-type endopeptidase activity [GO:0004298]	cytoplasm [GO:0005737];cytosol [GO:0005829];extracellular exosome [GO:0070062];nucleoplasm [GO:0005654];nucleus [GO:0005634];proteasome complex [GO:0000502];proteasome core complex [GO:0005839];proteasome core complex, alpha-subunit complex [GO:0019773];proteasome core complex [GO:0005839]	GO:0000165;GO:0000209;GO:0000502;GO:0002223;GO:0002479;GO:0004298;GO:0005634;GO:0005654;GO:0005737;GO:0005829;GO:0005839;GO:0006521;GO:0016032;GO:0019773;GO:0031145;GO:0033209;GO:0038061;GO:0038095;GO:0043161;GO:0043488;GO:0050852;GO:0051436;GO:0051437;GO:0052548;GO:0060071;GO:0070062;GO:0090090;GO:0090263;GO:0004298;GO:0005839;GO:0051603
20.5536	21.9612	21.3684	21.1463	20.7484	20.7083	19.3866	19.6124	20.447	22.9228	23.0908	23.0895		NaN	NaN	-0.426755	+	4.16865	3.46378	3.21903	G0XQ39;Q13586;E9PNJ4;H0YDB2;E9PIQ8;E9PRE4;E9PR07;E9PJ19;E9PMB4;E9PRZ7;E9PR09;E9PN27	G0XQ39;Q13586;E9PNJ4	Stromal interaction molecule 1	STIM1				activation of store-operated calcium channel activity [GO:0032237];cellular calcium ion homeostasis [GO:0006874];detection of calcium ion [GO:0005513];enamel mineralization [GO:0070166];regulation of calcium ion transport [GO:0051924];regulation of cardiac conduction [GO:1903779];store-operated calcium entry [GO:0002115];activation of store-operated calcium channel activity [GO:0032237];myotube d…	calcium channel regulator activity [GO:0005246];calcium ion binding [GO:0005509];identical protein binding [GO:0042802];microtubule plus-end binding [GO:0051010];protease binding [GO:0002020];calcium channel regulator activity [GO:0005246];store-operated calcium channel activity [GO:0015279];calcium channel regulator activity [GO:0005246];calcium channel regulator activity [GO:0005246];calcium ch…	cortical endoplasmic reticulum [GO:0032541];endoplasmic reticulum [GO:0005783];endoplasmic reticulum membrane [GO:0005789];integral component of endoplasmic reticulum membrane [GO:0030176];integral component of plasma membrane [GO:0005887];microtubule [GO:0005874];sarcoplasmic reticulum membrane [GO:0033017];endoplasmic reticulum [GO:0005783];growth cone [GO:0030426];integral component of endopla…	GO:0002020;GO:0002115;GO:0005246;GO:0005509;GO:0005513;GO:0005783;GO:0005789;GO:0005874;GO:0005887;GO:0006874;GO:0030176;GO:0032237;GO:0032541;GO:0033017;GO:0042802;GO:0051010;GO:0051924;GO:0070166;GO:1903779;GO:0002115;GO:0005246;GO:0005783;GO:0005886;GO:0014902;GO:0015279;GO:0030176;GO:0030426;GO:0032237;GO:0043234;GO:2001256;GO:0005246;GO:0030176;GO:0032237;GO:0005246;GO:0030176;GO:0032237;GO:…
20.8911	20.076	20.368	21.7024	23.2224	22.6434	19.6564	20.2734	20.4695	23.2871	22.8915	23.7294		NaN	NaN	2.0777	+	2.61917	3.7393	3.16959	B1APM4;P35610	B1APM4;P35610	Sterol O-acyltransferase 1	SOAT1	CATALYTIC ACTIVITY: Acyl-CoA + cholesterol = CoA + cholesterol ester. {ECO:0000269|PubMed:18480028}.	2.3.1.26	ACT_SITE 460 460 {ECO:0000269|PubMed:16154994}.	cholesterol efflux [GO:0033344];cholesterol esterification [GO:0034435];cholesterol homeostasis [GO:0042632];cholesterol metabolic process [GO:0008203];cholesterol storage [GO:0010878];macrophage derived foam cell differentiation [GO:0010742];positive regulation of amyloid precursor protein biosynthetic process [GO:0042986];very-low-density lipoprotein particle assembly [GO:0034379]	cholesterol binding [GO:0015485];cholesterol O-acyltransferase activity [GO:0034736];fatty-acyl-CoA binding [GO:0000062];sterol O-acyltransferase activity [GO:0004772];O-acyltransferase activity [GO:0008374]	endoplasmic reticulum [GO:0005783];endoplasmic reticulum membrane [GO:0005789];integral component of membrane [GO:0016021];membrane [GO:0016020];endoplasmic reticulum [GO:0005783];integral component of membrane [GO:0016021]	GO:0000062;GO:0004772;GO:0005783;GO:0005789;GO:0008203;GO:0010742;GO:0010878;GO:0015485;GO:0016020;GO:0016021;GO:0033344;GO:0034379;GO:0034435;GO:0034736;GO:0042632;GO:0042986;GO:0005783;GO:0008374;GO:0016021
20.8212	20.0806	21.5139	23.4154	22.7528	23.1934	19.4121	19.1957	19.0652	22.2142	22.6127	22.2173		2.31334	1.52284	2.31527	+	3.58106	2.56574	3.12374	A0A0R4J2G3;A0A0A0MTJ9;Q6PIU2;H7C046	A0A0R4J2G3;A0A0A0MTJ9;Q6PIU2;H7C046	Neutral cholesterol ester hydrolase 1	NCEH1		3.1.1.-	ACT_SITE 191 191 {ECO:0000255|PROSITE-ProRule:PRU10038}.;ACT_SITE 348 348 {ECO:0000255|PROSITE-ProRule:PRU10038}.;ACT_SITE 378 378 {ECO:0000255|PROSITE-ProRule:PRU10038}.;ACT_SITE 231 231 {ECO:0000256|PIRSR:PIRSR037251-1}.;ACT_SITE 388 388 {ECO:0000256|PIRSR:PIRSR037251-1}.;ACT_SITE 418 418 {ECO:0000256|PIRSR:PIRSR037251-1}.;ACT_SITE 223 223 {ECO:0000256|PIRSR:PIRSR037251-1}.;ACT_SITE 380 380 {EC…	catabolic process [GO:0009056];lipid catabolic process [GO:0016042];xenobiotic metabolic process [GO:0006805];metabolic process [GO:0008152];protein dephosphorylation [GO:0006470];SMAD protein signal transduction [GO:0060395];xenobiotic metabolic process [GO:0006805];metabolic process [GO:0008152]	serine hydrolase activity [GO:0017171];sterol esterase activity [GO:0004771];hydrolase activity [GO:0016787];carboxylic ester hydrolase activity [GO:0052689];phosphate ion binding [GO:0042301];serine hydrolase activity [GO:0017171];carboxylic ester hydrolase activity [GO:0052689]	endoplasmic reticulum membrane [GO:0005789];integral component of membrane [GO:0016021];membrane [GO:0016020];integral component of membrane [GO:0016021];integral component of membrane [GO:0016021];integral component of membrane [GO:0016021]	GO:0004771;GO:0005789;GO:0006805;GO:0009056;GO:0016020;GO:0016021;GO:0016042;GO:0017171;GO:0008152;GO:0016021;GO:0016787;GO:0006470;GO:0006805;GO:0016021;GO:0017171;GO:0042301;GO:0052689;GO:0060395;GO:0008152;GO:0016021;GO:0052689
21.2952	21.3482	20.7867	20.6084	20.4627	20.6021	19.9048	21.1151	19.2004	22.8641	23.1383	23.1874		NaN	NaN	-0.585663	+	4.47254	3.31083	2.98986	Q8WUY1;H0YAR9	Q8WUY1	Protein THEM6	THEM6						extracellular region [GO:0005576]	GO:0005576
20.7677	21.2272	21.3104	22.1562	21.5925	19.7093	19.0486	19.7457	19.2927	22.3178	22.2558	22.3113		NaN	NaN	0.0508658	+	1.7069	2.67011	2.93263	E7EVQ6;Q14534;E5RJH9	E7EVQ6;Q14534;E5RJH9	Squalene monooxygenase	SQLE	CATALYTIC ACTIVITY: Squalene + [reduced NADPH--hemoprotein reductase] + O(2) = (3S)-2,3-epoxy-2,3-dihydrosqualene + [oxidized NADPH--hemoprotein reductase] + H(2)O.	1.14.14.17		cellular aromatic compound metabolic process [GO:0006725];cholesterol biosynthetic process [GO:0006695];cholesterol metabolic process [GO:0008203];response to organic substance [GO:0010033];sterol biosynthetic process [GO:0016126]	flavin adenine dinucleotide binding [GO:0050660];squalene monooxygenase activity [GO:0004506];flavin adenine dinucleotide binding [GO:0050660];squalene monooxygenase activity [GO:0004506];FAD binding [GO:0071949];oxidoreductase activity [GO:0016491]	endoplasmic reticulum [GO:0005783];endoplasmic reticulum membrane [GO:0005789];integral component of membrane [GO:0016021];organelle membrane [GO:0031090];integral component of membrane [GO:0016021]	GO:0004506;GO:0005783;GO:0005789;GO:0006695;GO:0006725;GO:0008203;GO:0010033;GO:0016021;GO:0016126;GO:0031090;GO:0050660;GO:0004506;GO:0016021;GO:0050660;GO:0016491;GO:0071949
19.8832	20.8099	20.4201	22.9545	21.8325	22.3621	19.8392	18.8491	20.803	22.4965	22.4967	23.0225		1.11319	1.24917	2.01199	+	2.37518	3.29188	2.84147	A0A024RCR6;A0A0G2JK23;P46379;A0A0G2JL47;H0Y710;H0Y4L1;F6TC96;F6UR09;F6U1F2;F6XTU0;A0A0G2JJR8;A0A1B0GX79;F6WML8;F6VEM6;F6X9W3;F6U341;F6S6P2;X6REW1;A0A0G2JJM1	A0A024RCR6;A0A0G2JK23;P46379;A0A0G2JL47	Large proline-rich protein BAG6	BAT3;BAG6				brain development [GO:0007420];cell differentiation [GO:0030154];covalent chromatin modification [GO:0016569];embryo development [GO:0009790];immune system process [GO:0002376];internal peptidyl-lysine acetylation [GO:0018393];intrinsic apoptotic signaling pathway in response to DNA damage by p53 class mediator [GO:0042771];intrinsic apoptotic signaling pathway in response to endoplasmic reticulu…	misfolded protein binding [GO:0051787];polyubiquitin binding [GO:0031593];proteasome binding [GO:0070628];ribosome binding [GO:0043022];ubiquitin protein ligase binding [GO:0031625];ubiquitin-specific protease binding [GO:1990381]	BAT3 complex [GO:0071818];cytoplasm [GO:0005737];cytosol [GO:0005829];intracellular membrane-bounded organelle [GO:0043231];membrane [GO:0016020];nucleoplasm [GO:0005654];nucleus [GO:0005634]	GO:0001822;GO:0002376;GO:0005634;GO:0005654;GO:0005737;GO:0005829;GO:0006511;GO:0006810;GO:0007130;GO:0007283;GO:0007420;GO:0009790;GO:0016020;GO:0016569;GO:0018393;GO:0030154;GO:0030324;GO:0031593;GO:0031625;GO:0032435;GO:0042127;GO:0042771;GO:0043022;GO:0043066;GO:0043231;GO:0045861;GO:0050821;GO:0051787;GO:0070059;GO:0070628;GO:0071816;GO:0071818;GO:1904294;GO:1904378;GO:1904379;GO:1990381
21.8036	21.8528	22.2645	21.7898	19.6461	20.1507	20.2977	19.5098	20.4782	22.1345	23.9297	22.6922		NaN	NaN	-1.44475	+	2.58578	3.66177	2.82356	A0A0J9YYE9;P01850;A0A0G2JMB4;A0A075B6S1;A0A1B0GTL4;A0A0G2JMG7;A0A0G2JM62;A0A087WZV8;A0A1B0GWK1;A0A0G2JNG9;A0A5B9	A0A0J9YYE9;P01850;A0A0G2JMB4;A0A075B6S1;A0A1B0GTL4;A0A0G2JMG7;A0A0G2JM62;A0A087WZV8;A0A1B0GWK1;A0A0G2JNG9;A0A5B9	T-cell receptor beta-1 chain C region;T-cell receptor beta-2 chain C region	TRBC1;TRBC2;TRBV28				immune response [GO:0006955];regulation of immune response [GO:0050776];T cell costimulation [GO:0031295];T cell receptor signaling pathway [GO:0050852]		integral component of membrane [GO:0016021];membrane [GO:0016020];plasma membrane [GO:0005886];integral component of membrane [GO:0016021];integral component of membrane [GO:0016021];integral component of membrane [GO:0016021];integral component of membrane [GO:0016021];integral component of membrane [GO:0016021];integral component of membrane [GO:0016021];integral component of membrane [GO:00160…	GO:0005886;GO:0006955;GO:0016020;GO:0016021;GO:0031295;GO:0050776;GO:0050852;GO:0016021;GO:0016021;GO:0016021;GO:0016021;GO:0016021;GO:0016021;GO:0016021;GO:0016021;GO:0016021;GO:0016021
21.5733	21.8094	21.4268	20.0818	20.5694	20.5945	20.4561	20.4976	19.7239	22.7613	23.155	23.106		NaN	NaN	-1.18793	+	2.53102	3.1963	2.78155	J3KQ48;Q9Y3E5	J3KQ48;Q9Y3E5	Peptidyl-tRNA hydrolase 2, mitochondrial	PTRH2	CATALYTIC ACTIVITY: N-substituted aminoacyl-tRNA + H(2)O = N-substituted amino acid + tRNA.	3.1.1.29		apoptotic process [GO:0006915];negative regulation of anoikis [GO:2000811];negative regulation of gene expression [GO:0010629];positive regulation of anoikis [GO:2000210]	aminoacyl-tRNA hydrolase activity [GO:0004045];aminoacyl-tRNA hydrolase activity [GO:0004045]	cytosol [GO:0005829];membrane [GO:0016020];mitochondrion [GO:0005739];integral component of membrane [GO:0016021];mitochondrion [GO:0005739]	GO:0004045;GO:0005739;GO:0005829;GO:0006915;GO:0010629;GO:0016020;GO:2000210;GO:2000811;GO:0004045;GO:0005739;GO:0016021
20.5291	20.6485	20.6077	21.768	21.4987	21.6325	18.527	19.8769	20.0267	22.4248	21.9196	22.3635		0.331962	0.450144	1.03797	+	2.60267	1.88321	2.7591	O15118;K7EQ23	O15118	Niemann-Pick C1 protein	NPC1				adult walking behavior [GO:0007628];autophagy [GO:0006914];bile acid metabolic process [GO:0008206];cellular response to low-density lipoprotein particle stimulus [GO:0071404];cellular response to steroid hormone stimulus [GO:0071383];cholesterol efflux [GO:0033344];cholesterol homeostasis [GO:0042632];cholesterol metabolic process [GO:0008203];cholesterol transport [GO:0030301];endocytosis [GO:0…	cholesterol binding [GO:0015485];receptor activity [GO:0004872];sterol transporter activity [GO:0015248];transmembrane signaling receptor activity [GO:0004888];virus receptor activity [GO:0001618];lipid transporter activity [GO:0005319]	endoplasmic reticulum [GO:0005783];extracellular exosome [GO:0070062];extracellular region [GO:0005576];Golgi apparatus [GO:0005794];integral component of membrane [GO:0016021];integral component of plasma membrane [GO:0005887];late endosome membrane [GO:0031902];lysosomal membrane [GO:0005765];lysosome [GO:0005764];membrane [GO:0016020];membrane raft [GO:0045121];nuclear envelope [GO:0005635];pe…	GO:0001618;GO:0004872;GO:0004888;GO:0005576;GO:0005635;GO:0005764;GO:0005765;GO:0005783;GO:0005794;GO:0005887;GO:0006486;GO:0006897;GO:0006914;GO:0007041;GO:0007628;GO:0008203;GO:0008206;GO:0015248;GO:0015485;GO:0016020;GO:0016021;GO:0016242;GO:0030301;GO:0031579;GO:0031902;GO:0033344;GO:0042493;GO:0042632;GO:0045121;GO:0046686;GO:0046718;GO:0048471;GO:0060548;GO:0070062;GO:0071383;GO:0071404;GO:…
20.1342	21.1644	20.7498	20.2396	20.9309	20.8168	20.3619	18.9067	19.6455	22.3482	22.5096	22.2599		NaN	NaN	-0.0203775	+	2.71168	2.7075	2.73452	Q9Y6A9;C9JBL1;X6R2S6	Q9Y6A9;C9JBL1;X6R2S6	Signal peptidase complex subunit 1	SPCS1		3.4.-.-		protein targeting to ER [GO:0045047];proteolysis [GO:0006508];signal peptide processing [GO:0006465];signal peptide processing [GO:0006465];signal peptide processing [GO:0006465]	peptidase activity [GO:0008233];peptidase activity [GO:0008233];ribosome binding [GO:0043022];peptidase activity [GO:0008233]	endoplasmic reticulum membrane [GO:0005789];integral component of endoplasmic reticulum membrane [GO:0030176];organelle membrane [GO:0031090];signal peptidase complex [GO:0005787];integral component of membrane [GO:0016021];signal peptidase complex [GO:0005787];integral component of membrane [GO:0016021];signal peptidase complex [GO:0005787]	GO:0005787;GO:0005789;GO:0006465;GO:0006508;GO:0008233;GO:0030176;GO:0031090;GO:0045047;GO:0005787;GO:0006465;GO:0008233;GO:0016021;GO:0043022;GO:0005787;GO:0006465;GO:0008233;GO:0016021
21.8314	20.2248	20.9545	20.8276	21.5323	20.7821	18.7029	18.8194	20.3396	21.8371	22.1002	22.121		NaN	NaN	0.0437787	+	3.20113	3.01968	2.73211	P51572;C9JMD7;C9JSP1;C9JQ75;C9J0M4;C9JM14	P51572	B-cell receptor-associated protein 31	BCAP31				antigen processing and presentation of peptide antigen via MHC class I [GO:0002474];calcium-mediated signaling using intracellular calcium source [GO:0035584];cellular component disassembly involved in execution phase of apoptosis [GO:0006921];ER to Golgi vesicle-mediated transport [GO:0006888];intracellular protein transport [GO:0006886];negative regulation of endoplasmic reticulum calcium ion c…		clathrin-coated vesicle [GO:0030136];cytosol [GO:0005829];endoplasmic reticulum [GO:0005783];endoplasmic reticulum-Golgi intermediate compartment membrane [GO:0033116];endoplasmic reticulum membrane [GO:0005789];Golgi cisterna membrane [GO:0032580];integral component of lumenal side of endoplasmic reticulum membrane [GO:0071556];integral component of plasma membrane [GO:0005887];lipid particle [G…	GO:0002474;GO:0005739;GO:0005783;GO:0005789;GO:0005811;GO:0005829;GO:0005887;GO:0006886;GO:0006888;GO:0006921;GO:0007204;GO:0007283;GO:0016020;GO:0030136;GO:0032471;GO:0032580;GO:0033116;GO:0035584;GO:0043280;GO:0051561;GO:0070973;GO:0071556;GO:0097038;GO:1903071;GO:1904154;GO:2001244;GO:0005783;GO:0006886;GO:0016021;GO:0005783;GO:0006886;GO:0016021;GO:0005783;GO:0006886;GO:0016021;GO:0005783;GO:…
21.063	21.6878	21.0405	21.441	19.9975	21.033	19.1751	19.4829	19.6725	22.2391	21.9891	22.2828		NaN	NaN	-0.439971	+	2.70834	2.55811	2.72683	P56134;C9JJT5;C9JU26;G3V325	P56134;C9JJT5;C9JU26;G3V325	ATP synthase subunit f, mitochondrial	ATP5J2;ATP5J2-PTCD1				ATP biosynthetic process [GO:0006754];mitochondrial ATP synthesis coupled proton transport [GO:0042776];proton transport [GO:0015992]	transmembrane transporter activity [GO:0022857]	extracellular exosome [GO:0070062];integral component of membrane [GO:0016021];mitochondrial inner membrane [GO:0005743];mitochondrial proton-transporting ATP synthase complex [GO:0005753];mitochondrial proton-transporting ATP synthase complex, coupling factor F(o) [GO:0000276];nucleus [GO:0005634];integral component of membrane [GO:0016021]	GO:0000276;GO:0005634;GO:0005743;GO:0005753;GO:0006754;GO:0015992;GO:0016021;GO:0022857;GO:0042776;GO:0070062;GO:0016021
19.7219	21.0881	20.6276	21.5071	21.0932	19.2765	20.6729	19.9362	20.0361	23.3673	22.5851	22.7915		NaN	NaN	0.146443	+	2.81929	3.63161	2.6996	P28072;A0A087X2I4	P28072	Proteasome subunit beta type-6	PSMB6	CATALYTIC ACTIVITY: Cleavage of peptide bonds with very broad specificity.;CATALYTIC ACTIVITY: Cleavage of peptide bonds with very broad specificity. {ECO:0000256|RuleBase:RU000694}.	3.4.25.1;3.4.25.1	ACT_SITE 35 35 Nucleophile. {ECO:0000250}.	anaphase-promoting complex-dependent catabolic process [GO:0031145];antigen processing and presentation of exogenous peptide antigen via MHC class I, TAP-dependent [GO:0002479];Fc-epsilon receptor signaling pathway [GO:0038095];MAPK cascade [GO:0000165];negative regulation of canonical Wnt signaling pathway [GO:0090090];negative regulation of ubiquitin-protein ligase activity involved in mitotic …	cadherin binding involved in cell-cell adhesion [GO:0098641];endopeptidase activity [GO:0004175];threonine-type endopeptidase activity [GO:0004298];threonine-type endopeptidase activity [GO:0004298]	cell-cell adherens junction [GO:0005913];cytoplasm [GO:0005737];cytosol [GO:0005829];extracellular exosome [GO:0070062];Golgi apparatus [GO:0005794];nucleoplasm [GO:0005654];nucleus [GO:0005634];proteasome complex [GO:0000502];proteasome core complex [GO:0005839];cytoplasm [GO:0005737];nucleus [GO:0005634];proteasome core complex [GO:0005839]	GO:0000165;GO:0000209;GO:0000502;GO:0002223;GO:0002479;GO:0004175;GO:0004298;GO:0005634;GO:0005654;GO:0005737;GO:0005794;GO:0005829;GO:0005839;GO:0005913;GO:0006521;GO:0016032;GO:0031145;GO:0033209;GO:0038061;GO:0038095;GO:0043161;GO:0043488;GO:0050852;GO:0051436;GO:0051437;GO:0060071;GO:0070062;GO:0090090;GO:0090263;GO:0098641;GO:0004298;GO:0005634;GO:0005737;GO:0005839;GO:0051603
21.1579	21.0484	21.5914	20.9748	20.0447	20.4901	19.9036	19.5716	20.1985	22.4706	22.7098	22.4476		NaN	NaN	-0.762733	+	2.22105	2.94603	2.65142	P49755;G3V2K7	P49755;G3V2K7	Transmembrane emp24 domain-containing protein 10	TMED10				cargo loading into vesicle [GO:0035459];COPI-coated vesicle budding [GO:0035964];COPI coating of Golgi vesicle [GO:0048205];COPII vesicle coating [GO:0048208];ER to Golgi vesicle-mediated transport [GO:0006888];Golgi organization [GO:0007030];intracellular protein transport [GO:0006886];kidney development [GO:0001822];protein oligomerization [GO:0051259];regulated exocytosis [GO:0045055];regulati…	syntaxin binding [GO:0019905]	cis-Golgi network [GO:0005801];COPI-coated vesicle [GO:0030137];endoplasmic reticulum [GO:0005783];endoplasmic reticulum-Golgi intermediate compartment [GO:0005793];endoplasmic reticulum-Golgi intermediate compartment membrane [GO:0033116];endoplasmic reticulum membrane [GO:0005789];ER to Golgi transport vesicle membrane [GO:0012507];extracellular exosome [GO:0070062];gamma-secretase complex [GO:…	GO:0000139;GO:0001822;GO:0005783;GO:0005789;GO:0005793;GO:0005794;GO:0005801;GO:0005886;GO:0006886;GO:0006888;GO:0006890;GO:0007030;GO:0012507;GO:0016021;GO:0019905;GO:0030133;GO:0030137;GO:0030140;GO:0030667;GO:0033116;GO:0035459;GO:0035964;GO:0042470;GO:0042589;GO:0043279;GO:0045055;GO:0048199;GO:0048205;GO:0048208;GO:0051259;GO:0070062;GO:0070765;GO:1902003;GO:0006810;GO:0016021
21.6318	21.9677	20.6495	21.8689	20.6545	21.8256	20.3083	19.5662	18.7445	22.294	22.1453	22.122		NaN	NaN	0.0333055	+	3.07612	2.76543	2.64744	P61962;A0A087WWI6	P61962	DDB1- and CUL4-associated factor 7	DCAF7				multicellular organism development [GO:0007275];protein ubiquitination [GO:0016567]		Cul4-RING E3 ubiquitin ligase complex [GO:0080008];cytoplasm [GO:0005737];nuclear matrix [GO:0016363];nucleoplasm [GO:0005654];protein complex [GO:0043234]	GO:0005654;GO:0005737;GO:0007275;GO:0016363;GO:0016567;GO:0043234;GO:0080008
21.2206	21.1095	20.3824	21.0504	20.8351	21.0265	19.3738	19.9739	19.0176	22.0197	22.1523	22.0277		NaN	NaN	0.0664953	+	2.88543	2.22615	2.61149	O75844	O75844	CAAX prenyl protease 1 homolog	ZMPSTE24	CATALYTIC ACTIVITY: The peptide bond hydrolyzed can be designated -C-|-A-A-X in which C is an S-isoprenylated cysteine residue, A is usually aliphatic and X is the C-terminal residue of the substrate protein, and may be any of several amino acids.	3.4.24.84	ACT_SITE 336 336 {ECO:0000269|PubMed:23539603}.;ACT_SITE 419 419 Proton donor. {ECO:0000250}.	CAAX-box protein processing [GO:0071586];nuclear envelope organization [GO:0006998];prenylated protein catabolic process [GO:0030327];proteolysis [GO:0006508]	metal ion binding [GO:0046872];metalloendopeptidase activity [GO:0004222];metalloexopeptidase activity [GO:0008235]	extracellular exosome [GO:0070062];integral component of endoplasmic reticulum membrane [GO:0030176];membrane [GO:0016020];nuclear inner membrane [GO:0005637]	GO:0004222;GO:0005637;GO:0006508;GO:0006998;GO:0008235;GO:0016020;GO:0030176;GO:0030327;GO:0046872;GO:0070062;GO:0071586
20.0298	20.991	21.4188	20.5311	20.6314	20.7081	19.8925	20.4307	19.5762	22.4951	22.665	22.5123		NaN	NaN	-0.189662	+	2.64061	2.63278	2.59102	A2A2G4;Q9Y672;S4R350	A2A2G4;Q9Y672;S4R350	Dolichyl pyrophosphate Man9GlcNAc2 alpha-1,3-glucosyltransferase	ALG6	CATALYTIC ACTIVITY: Dolichyl beta-D-glucosyl phosphate + D-Man-alpha-(1->2)-D-Man-alpha-(1->2)-D-Man-alpha-(1->3)-[D-Man-alpha-(1->2)-D-Man-alpha-(1->3)-(D-Man-alpha-(1->2)-D-Man-alpha-(1->6))-D-Man-alpha-(1->6)]-D-Man-beta-(1->4)-D-GlcNAc-beta-(1->4)-D-GlcNAc-diphosphodolichol = D-Glc-alpha-(1->3)-D-Man-alpha-(1->2)-D-Man-alpha-(1->2)-D-Man-alpha-(1->3)-[D-Man-alpha-(1->2)-D-Man-alpha-(1->3)-(D-…	2.4.1.267;2.4.1.-;2.4.1.-		dolichol-linked oligosaccharide biosynthetic process [GO:0006488];oligosaccharide-lipid intermediate biosynthetic process [GO:0006490];protein N-linked glycosylation [GO:0006487]	dolichyl-phosphate-glucose-glycolipid alpha-glucosyltransferase activity [GO:0004583];dolichyl pyrophosphate Man9GlcNAc2 alpha-1,3-glucosyltransferase activity [GO:0042281];glucosyltransferase activity [GO:0046527];transferase activity, transferring hexosyl groups [GO:0016758];transferase activity, transferring hexosyl groups [GO:0016758]	endoplasmic reticulum membrane [GO:0005789];integral component of membrane [GO:0016021];membrane [GO:0016020];endoplasmic reticulum membrane [GO:0005789];integral component of membrane [GO:0016021];endoplasmic reticulum membrane [GO:0005789];integral component of membrane [GO:0016021]	GO:0004583;GO:0005789;GO:0006487;GO:0006488;GO:0006490;GO:0016020;GO:0016021;GO:0042281;GO:0046527;GO:0005789;GO:0016021;GO:0016758;GO:0005789;GO:0016021;GO:0016758
20.5296	21.4576	20.9732	21.35	20.9597	19.6459	18.6762	19.7045	19.8004	21.8501	21.9164	22.1662		NaN	NaN	-0.334936	+	2.09217	1.96003	2.58387	O14828	O14828	Secretory carrier-associated membrane protein 3	SCAMP3				post-Golgi vesicle-mediated transport [GO:0006892];protein transport [GO:0015031];response to retinoic acid [GO:0032526]	ubiquitin protein ligase binding [GO:0031625]	extracellular exosome [GO:0070062];Golgi membrane [GO:0000139];integral component of membrane [GO:0016021];intracellular membrane-bounded organelle [GO:0043231]	GO:0000139;GO:0006892;GO:0015031;GO:0016021;GO:0031625;GO:0032526;GO:0043231;GO:0070062
20.8857	20.8994	21.749	21.7977	20.0534	20.9122	19.5611	19.372	19.1713	21.6865	22.0018	22.0882		NaN	NaN	-0.256877	+	2.01546	2.12401	2.55736	H0Y9V7;B4E2Q0;P98194;H0Y8X9;H0Y9S7	H0Y9V7;B4E2Q0;P98194;H0Y8X9;H0Y9S7	Calcium-transporting ATPase;Calcium-transporting ATPase type 2C member 1	ATP2C1	CATALYTIC ACTIVITY: ATP + H(2)O + Ca(2+)(Side 1) = ADP + phosphate + Ca(2+)(Side 2).;CATALYTIC ACTIVITY: ATP + H(2)O + Ca(2+)(Side 1) = ADP + phosphate + Ca(2+)(Side 2). {ECO:0000256|RuleBase:RU361146}.	3.6.3.8;3.6.3.8	ACT_SITE 350 350 4-aspartylphosphate intermediate. {ECO:0000250}.	actin cytoskeleton reorganization [GO:0031532];calcium-dependent cell-cell adhesion via plasma membrane cell adhesion molecules [GO:0016339];calcium ion transport [GO:0006816];cellular calcium ion homeostasis [GO:0006874];cellular manganese ion homeostasis [GO:0030026];epidermis development [GO:0008544];Golgi calcium ion homeostasis [GO:0032468];Golgi calcium ion transport [GO:0032472];ion transm…	ATP binding [GO:0005524];calcium ion binding [GO:0005509];calcium-transporting ATPase activity [GO:0005388];manganese ion binding [GO:0030145];manganese-transporting ATPase activity [GO:0015410];metal ion binding [GO:0046872];signal transducer activity [GO:0004871];ATP binding [GO:0005524];calcium-transporting ATPase activity [GO:0005388];metal ion binding [GO:0046872];ATP binding [GO:0005524];ca…	Golgi apparatus [GO:0005794];Golgi membrane [GO:0000139];integral component of membrane [GO:0016021];integral component of plasma membrane [GO:0005887];membrane [GO:0016020];trans-Golgi network [GO:0005802];integral component of membrane [GO:0016021];integral component of membrane [GO:0016021];integral component of membrane [GO:0016021];integral component of membrane [GO:0016021]	GO:0000139;GO:0004871;GO:0005388;GO:0005509;GO:0005524;GO:0005794;GO:0005802;GO:0005887;GO:0006816;GO:0006828;GO:0006874;GO:0008544;GO:0015410;GO:0016020;GO:0016021;GO:0016339;GO:0030026;GO:0030145;GO:0031532;GO:0032468;GO:0032472;GO:0034220;GO:0043123;GO:0046872;GO:0005388;GO:0005524;GO:0016021;GO:0046872;GO:0005388;GO:0005524;GO:0016021;GO:0005388;GO:0005524;GO:0016021;GO:0005388;GO:0005524;GO:…
20.3696	20.4066	21.0673	22.1072	20.8845	20.4814	19.643	19.8259	19.8268	22.2042	22.4876	22.2702		NaN	NaN	0.543216	+	4.11369	2.88192	2.55541	F5GY37;J3KPX7;Q99623;F5H3X6;F5GWA7	F5GY37;J3KPX7;Q99623;F5H3X6;F5GWA7	Prohibitin-2	PHB2				mammary gland alveolus development [GO:0060749];mammary gland branching involved in thelarche [GO:0060744];mitochondrion organization [GO:0007005];negative regulation of apoptotic process [GO:0043066];negative regulation of intracellular estrogen receptor signaling pathway [GO:0033147];negative regulation of mammary gland epithelial cell proliferation [GO:0033600];negative regulation of sequence-…	amide binding [GO:0033218];estrogen receptor binding [GO:0030331];protein C-terminus binding [GO:0008022];protein N-terminus binding [GO:0047485]	cell periphery [GO:0071944];cell surface [GO:0009986];cytoplasm [GO:0005737];extracellular exosome [GO:0070062];mitochondrial inner membrane [GO:0005743];mitochondrial outer membrane [GO:0005741];mitochondrion [GO:0005739];nuclear matrix [GO:0016363];nucleus [GO:0005634];protein complex [GO:0043234];membrane [GO:0016020];membrane [GO:0016020];membrane [GO:0016020];membrane [GO:0016020]	GO:0000060;GO:0005634;GO:0005737;GO:0005739;GO:0005741;GO:0005743;GO:0006351;GO:0007005;GO:0007062;GO:0008022;GO:0009986;GO:0016363;GO:0030331;GO:0031536;GO:0033147;GO:0033218;GO:0033600;GO:0043066;GO:0043234;GO:0043433;GO:0045892;GO:0047485;GO:0050821;GO:0051091;GO:0060744;GO:0060749;GO:0060762;GO:0070062;GO:0070374;GO:0071944;GO:1902808;GO:0016020;GO:0016020;GO:0016020;GO:0016020
19.8791	20.3566	19.9346	21.4919	21.355	20.8255	19.7402	19.7309	19.4088	22.1008	22.0255	22.3882		NaN	NaN	1.16738	+	3.14497	2.34818	2.54486	E9PSH8;P07766	E9PSH8;P07766	T-cell surface glycoprotein CD3 epsilon chain	CD3E				apoptotic signaling pathway [GO:0097190];cell surface receptor signaling pathway [GO:0007166];G-protein coupled receptor signaling pathway [GO:0007186];negative regulation of gene expression [GO:0010629];negative regulation of smoothened signaling pathway [GO:0045879];negative thymic T cell selection [GO:0045060];positive regulation of alpha-beta T cell proliferation [GO:0046641];positive regulat…	protein heterodimerization activity [GO:0046982];protein kinase binding [GO:0019901];receptor signaling complex scaffold activity [GO:0030159];SH3 domain binding [GO:0017124];signal transducer activity, downstream of receptor [GO:0005057];T cell receptor binding [GO:0042608];transmembrane signaling receptor activity [GO:0004888];transmembrane signaling receptor activity [GO:0004888]	alpha-beta T cell receptor complex [GO:0042105];cell-cell junction [GO:0005911];external side of plasma membrane [GO:0009897];immunological synapse [GO:0001772];integral component of plasma membrane [GO:0005887];plasma membrane [GO:0005886];T cell receptor complex [GO:0042101];integral component of membrane [GO:0016021]	GO:0001772;GO:0002669;GO:0004888;GO:0005057;GO:0005886;GO:0005887;GO:0005911;GO:0006461;GO:0007166;GO:0007169;GO:0007172;GO:0007186;GO:0007584;GO:0009897;GO:0010628;GO:0010629;GO:0017124;GO:0019901;GO:0030159;GO:0031295;GO:0032729;GO:0032753;GO:0042101;GO:0042102;GO:0042105;GO:0042110;GO:0042608;GO:0042981;GO:0045060;GO:0045086;GO:0045879;GO:0046641;GO:0046982;GO:0050731;GO:0050776;GO:0050850;GO:…
21.0675	21.1342	19.9553	22.004	22.4253	22.8764	19.547	21.3907	20.7241	23.0223	22.8396	23.0035		0.960268	1.11594	1.71623	+	2.53155	2.16537	2.4012	Q14318;U3KQ64;A0A0A0MTJ1;U3KQI1;M0R2K9;M0R1Q0;M0R1S6;M0R2Q6	Q14318;U3KQ64;A0A0A0MTJ1	Peptidyl-prolyl cis-trans isomerase FKBP8	FKBP8	CATALYTIC ACTIVITY: Peptidylproline (omega=180) = peptidylproline (omega=0). {ECO:0000269|PubMed:15990872}.	5.2.1.8;5.2.1.8;5.2.1.8;5.2.1.8;5.2.1.8		apoptotic process [GO:0006915];camera-type eye development [GO:0043010];cell fate specification [GO:0001708];chaperone-mediated protein folding [GO:0061077];dorsal/ventral neural tube patterning [GO:0021904];intracellular signal transduction [GO:0035556];multicellular organism growth [GO:0035264];negative regulation of apoptotic process [GO:0043066];positive regulation of BMP signaling pathway [G…	FK506 binding [GO:0005528];identical protein binding [GO:0042802];metal ion binding [GO:0046872];peptidyl-prolyl cis-trans isomerase activity [GO:0003755]	endoplasmic reticulum membrane [GO:0005789];integral component of endoplasmic reticulum membrane [GO:0030176];membrane [GO:0016020];mitochondrial membrane [GO:0031966];integral component of membrane [GO:0016021]	GO:0001708;GO:0003755;GO:0005528;GO:0005789;GO:0006915;GO:0007224;GO:0016020;GO:0016032;GO:0021904;GO:0030176;GO:0030513;GO:0031966;GO:0035264;GO:0035556;GO:0042802;GO:0043010;GO:0043066;GO:0046872;GO:0061077;GO:0006457;GO:0016021;GO:0006457;GO:0006457;GO:0006457
20.8917	21.5334	18.9701	20.8964	20.6127	21.1785	19.2305	19.3655	19.3722	21.5813	21.5163	22.0488		NaN	NaN	0.430858	+	3.5084	1.96915	2.39272	A0A087WXS7;O43681;K7ERW9	A0A087WXS7;O43681	ATPase ASNA1	ASNA1		3.6.-.-;3.6.-.-	ACT_SITE 74 74 {ECO:0000255|HAMAP-Rule:MF_03112}.;ACT_SITE 57 57 {ECO:0000256|HAMAP-Rule:MF_03112}.	IRE1-mediated unfolded protein response [GO:0036498];protein insertion into ER membrane [GO:0045048];transport [GO:0006810];protein insertion into ER membrane [GO:0045048];transport [GO:0006810]	arsenite transmembrane transporter activity [GO:0015105];ATPase activity, coupled to movement of substances [GO:0043492];ATP binding [GO:0005524];metal ion binding [GO:0046872];transporter activity [GO:0005215];ATPase activity [GO:0016887];ATP binding [GO:0005524];ATPase activity [GO:0016887];ATP binding [GO:0005524];metal ion binding [GO:0046872]	cytoplasm [GO:0005737];endoplasmic reticulum membrane [GO:0005789];extracellular exosome [GO:0070062];nucleolus [GO:0005730];nucleus [GO:0005634];nucleolus [GO:0005730];nucleus [GO:0005634];endoplasmic reticulum [GO:0005783];nucleus [GO:0005634]	GO:0005215;GO:0005524;GO:0005634;GO:0005730;GO:0005737;GO:0005789;GO:0006810;GO:0015105;GO:0036498;GO:0043492;GO:0045048;GO:0046872;GO:0070062;GO:0005524;GO:0005634;GO:0005730;GO:0016887;GO:0005524;GO:0005634;GO:0005783;GO:0006810;GO:0016887;GO:0045048;GO:0046872
22.2547	22.1687	21.6754	21.8635	22.4791	22.3828	19.7305	19.6155	19.8518	22.0364	22.0427	22.0891		0.326594	0.208867	0.208867	+	2.89643	2.14866	2.32345	P51149;C9J4V0;C9J8S3;C9J4S4;C9IZZ0;C9J592;C9J7D1	P51149;C9J4V0;C9J8S3;C9J4S4;C9IZZ0;C9J592	Ras-related protein Rab-7a	RAB7A				antigen processing and presentation of exogenous peptide antigen via MHC class II [GO:0019886];bone resorption [GO:0045453];early endosome to late endosome transport [GO:0045022];endocytosis [GO:0006897];endosome to lysosome transport [GO:0008333];epidermal growth factor catabolic process [GO:0007174];lipophagy [GO:0061724];multi-organism intracellular transport [GO:1902583];negative regulation o…	GDP binding [GO:0019003];GTPase activity [GO:0003924];GTP binding [GO:0005525];retromer complex binding [GO:1905394];GTP binding [GO:0005525];GTP binding [GO:0005525];GTP binding [GO:0005525];GTP binding [GO:0005525];GTP binding [GO:0005525];GTP binding [GO:0005525]	alveolar lamellar body [GO:0097208];autophagosome membrane [GO:0000421];cytosol [GO:0005829];endosome membrane [GO:0010008];extracellular exosome [GO:0070062];extrinsic component of lysosome membrane [GO:0032419];Golgi apparatus [GO:0005794];intracellular membrane-bounded organelle [GO:0043231];late endosome [GO:0005770];late endosome membrane [GO:0031902];lipid particle [GO:0005811];lysosomal me…	GO:0000421;GO:0003924;GO:0005525;GO:0005764;GO:0005765;GO:0005770;GO:0005774;GO:0005794;GO:0005811;GO:0005829;GO:0006622;GO:0006897;GO:0007174;GO:0007264;GO:0008333;GO:0010008;GO:0015031;GO:0019003;GO:0019076;GO:0019886;GO:0022615;GO:0030670;GO:0031902;GO:0032419;GO:0033162;GO:0034045;GO:0042147;GO:0043195;GO:0043231;GO:0045022;GO:0045335;GO:0045453;GO:0045732;GO:0048524;GO:0061724;GO:0070062;GO:…
21.3011	20.2691	20.7505	22.0181	20.344	20.2637	18.7749	19.0312	19.1445	21.4206	21.2175	21.111		NaN	NaN	0.101716	+	2.62565	1.93876	2.26619	P61353;K7EQQ9;K7ELC7;K7ERY7	P61353;K7EQQ9;K7ELC7	60S ribosomal protein L27	RPL27				nuclear-transcribed mRNA catabolic process, nonsense-mediated decay [GO:0000184];rRNA processing [GO:0006364];SRP-dependent cotranslational protein targeting to membrane [GO:0006614];translation [GO:0006412];translational initiation [GO:0006413];viral transcription [GO:0019083];translation [GO:0006412];translation [GO:0006412];translation [GO:0006412]	poly(A) RNA binding [GO:0044822];structural constituent of ribosome [GO:0003735];structural constituent of ribosome [GO:0003735];structural constituent of ribosome [GO:0003735];structural constituent of ribosome [GO:0003735]	cytosol [GO:0005829];cytosolic large ribosomal subunit [GO:0022625];extracellular exosome [GO:0070062];extracellular matrix [GO:0031012];focal adhesion [GO:0005925];intracellular ribonucleoprotein complex [GO:0030529];membrane [GO:0016020];nucleus [GO:0005634];ribosome [GO:0005840];ribosome [GO:0005840];ribosome [GO:0005840];ribosome [GO:0005840]	GO:0000184;GO:0003735;GO:0005634;GO:0005829;GO:0005840;GO:0005925;GO:0006364;GO:0006412;GO:0006413;GO:0006614;GO:0016020;GO:0019083;GO:0022625;GO:0030529;GO:0031012;GO:0044822;GO:0070062;GO:0003735;GO:0005840;GO:0006412;GO:0003735;GO:0005840;GO:0006412;GO:0003735;GO:0005840;GO:0006412
20.6619	21.3965	20.7764	22.0779	20.7753	20.1171	19.3306	19.5308	20.4047	22.0956	22.107	21.6944		NaN	NaN	0.0451692	+	2.63441	2.19871	2.21031	Q5I7T1;Q5BKT4;F8VWA9;F5H5T2;F8VXJ0;F5GZZ6	Q5I7T1;Q5BKT4;F8VWA9;F5H5T2;F8VXJ0;F5GZZ6	Putative Dol-P-Glc:Glc(2)Man(9)GlcNAc(2)-PP-Dol alpha-1,2-glucosyltransferase;Dol-P-Glc:Glc(2)Man(9)GlcNAc(2)-PP-Dol alpha-1,2-glucosyltransferase	ALG10B;ALG10	CATALYTIC ACTIVITY: Dolichyl beta-D-glucosyl phosphate + D-Glc-alpha-(1->3)-D-Glc-alpha-(1->3)-D-Man-alpha-(1->2)-D-Man-alpha-(1->2)-D-Man-alpha-(1->3)-[D-Man-alpha-(1->2)-D-Man-alpha-(1->3)-(D-Man-alpha-(1->2)-D-Man-alpha-(1->6))-D-Man-alpha-(1->6)]-D-Man-beta-(1->4)-D-GlcNAc-beta-(1->4)-D-GlcNAc-diphosphodolichol = D-Glc-alpha-(1->2)-D-Glc-alpha-(1->3)-D-Glc-alpha-(1->3)-D-Man-alpha-(1->2)-D-Ma…	2.4.1.256;2.4.1.256		dolichol-linked oligosaccharide biosynthetic process [GO:0006488];protein glycosylation [GO:0006486];dolichol-linked oligosaccharide biosynthetic process [GO:0006488];protein glycosylation [GO:0006486];dolichol-linked oligosaccharide biosynthetic process [GO:0006488];dolichol-linked oligosaccharide biosynthetic process [GO:0006488];dolichol-linked oligosaccharide biosynthetic process [GO:0006488]…	dolichyl-phosphate-glucose-glycolipid alpha-glucosyltransferase activity [GO:0004583];dolichyl-phosphate-glucose-glycolipid alpha-glucosyltransferase activity [GO:0004583];dolichyl-phosphate-glucose-glycolipid alpha-glucosyltransferase activity [GO:0004583];dolichyl-phosphate-glucose-glycolipid alpha-glucosyltransferase activity [GO:0004583];dolichyl-phosphate-glucose-glycolipid alpha-glucosyltra…	endoplasmic reticulum membrane [GO:0005789];integral component of membrane [GO:0016021];plasma membrane [GO:0005886];endoplasmic reticulum membrane [GO:0005789];integral component of membrane [GO:0016021];endoplasmic reticulum membrane [GO:0005789];endoplasmic reticulum membrane [GO:0005789];integral component of membrane [GO:0016021];endoplasmic reticulum membrane [GO:0005789];integral component…	GO:0004583;GO:0005789;GO:0005886;GO:0006486;GO:0006488;GO:0016021;GO:0004583;GO:0005789;GO:0006486;GO:0006488;GO:0016021;GO:0004583;GO:0005789;GO:0006488;GO:0004583;GO:0005789;GO:0006488;GO:0016021;GO:0004583;GO:0005789;GO:0006488;GO:0016021;GO:0004583;GO:0005789;GO:0006488;GO:0016021
19.8559	21.4383	20.6061	21.7717	20.5724	21.0432	19.979	19.5045	19.9456	22.0504	21.9205	21.9903		NaN	NaN	0.495698	+	3.00955	1.68528	2.17736	C9JZ20;E7ESE2;E9PCW0;C9JW96;P35232;D6RBK0	C9JZ20;E7ESE2;E9PCW0;C9JW96;P35232;D6RBK0	Prohibitin	PHB				cellular response to interleukin-6 [GO:0071354];DNA biosynthetic process [GO:0071897];histone deacetylation [GO:0016575];mitochondrion organization [GO:0007005];negative regulation of androgen receptor signaling pathway [GO:0060766];negative regulation of cell growth [GO:0030308];negative regulation of cell proliferation [GO:0008285];negative regulation of ERK1 and ERK2 cascade [GO:0070373];negat…	complement component C3a binding [GO:0001850];complement component C3b binding [GO:0001851];enzyme binding [GO:0019899];histone deacetylase binding [GO:0042826];proteinase activated receptor binding [GO:0031871];protein C-terminus binding [GO:0008022];RNA polymerase II transcription factor activity, sequence-specific DNA binding [GO:0000981];transcription regulatory region DNA binding [GO:0044212]	cell surface [GO:0009986];cytoplasm [GO:0005737];early endosome [GO:0005769];extracellular exosome [GO:0070062];integral component of plasma membrane [GO:0005887];membrane [GO:0016020];mitochondrial inner membrane [GO:0005743];mitochondrion [GO:0005739];myelin sheath [GO:0043209];nucleoplasm [GO:0005654];nucleus [GO:0005634];plasma membrane [GO:0005886];membrane [GO:0016020];membrane [GO:0016020]…	GO:0000122;GO:0000981;GO:0001649;GO:0001850;GO:0001851;GO:0005634;GO:0005654;GO:0005737;GO:0005739;GO:0005743;GO:0005769;GO:0005886;GO:0005887;GO:0006355;GO:0007005;GO:0007165;GO:0008022;GO:0008285;GO:0009986;GO:0010628;GO:0010942;GO:0010944;GO:0016020;GO:0016575;GO:0019899;GO:0030308;GO:0031871;GO:0042177;GO:0042826;GO:0042981;GO:0043209;GO:0044212;GO:0045745;GO:0045892;GO:0045893;GO:0045917;GO:…
20.6262	20.2677	23.1639	20.7131	23.759	22.7559	23.0542	22.874	22.7719	24.8268	25.1267	25.1198		NaN	NaN	1.05672	+	4.10223	2.1244	2.1244	P28288	P28288	ATP-binding cassette sub-family D member 3	ABCD3				fatty acid beta-oxidation [GO:0006635];fatty acid biosynthetic process [GO:0006633];peroxisomal long-chain fatty acid import [GO:0015910];peroxisome organization [GO:0007031];response to drug [GO:0042493];response to organic cyclic compound [GO:0014070];transmembrane transport [GO:0055085];very long-chain fatty acid catabolic process [GO:0042760]	ATPase activity [GO:0016887];ATPase activity, coupled to transmembrane movement of substances [GO:0042626];ATP binding [GO:0005524];long-chain fatty acid transporter activity [GO:0005324];protein homodimerization activity [GO:0042803]	cytosol [GO:0005829];integral component of membrane [GO:0016021];intracellular membrane-bounded organelle [GO:0043231];membrane [GO:0016020];mitochondrial inner membrane [GO:0005743];peroxisomal matrix [GO:0005782];peroxisomal membrane [GO:0005778];peroxisome [GO:0005777]	GO:0005324;GO:0005524;GO:0005743;GO:0005777;GO:0005778;GO:0005782;GO:0005829;GO:0006633;GO:0006635;GO:0007031;GO:0014070;GO:0015910;GO:0016020;GO:0016021;GO:0016887;GO:0042493;GO:0042626;GO:0042760;GO:0042803;GO:0043231;GO:0055085
[truncated: 1,312 more rows]

## Sheet: GO enrichment analysis probe 4
Selected statistical test : Hypergeometric test
Selected correction : Benjamini & Hochberg False Discovery Rate (FDR) correction
Selected significance level : 0.05
Testing option : Use whole annotation as reference set
The selected cluster :
MTCH2	DAZAP1	DDX42	ATP2A2	APEH	COMT	ABHD12	RPL39P5	SCPEP1	ABHD10	ABHD16A	SIT1	NUP62	UBAP2L	USP47	MED1	LYPLA1	CPT1A	PPP1R12A	PDCD6IP	TCF12	ABHD14B	TAP1	DYNC1LI1	GNPAT	PRPF6	THRAP3	AGPS	HCLS1	RPL24	ALDH9A1	KDM3B	USP10	ABHD6	RTN4	ESD	UBQLN1	HEATR3	HMOX2	CYB5B	C21ORF33	ST13	DDHD2	DDHD1	NCEH1	ABHD17B	FABP5	FASN	RPL27A	PPT1
GO-ID	p-value	corr p-value	x	n	X	N	Description	Genes in test set
9056	7.8057e-11	7.562e-09	24	1832	57	19368	catabolic process	USP47|MED1|LYPLA1|CPT1A|USP10|DDHD2|ABHD6|DDHD1|COMT|ABHD12|SCPEP1|ABHD10|NCEH1|FABP5|THRAP3|RPL27A|ESD|UBQLN1|PPT1|RPL24|PNPLA6|CPVL|HMOX2|EIF4G1
[truncated: 20 more rows]
[truncated: 7 more columns]
