# Supplementary material for: Quantitative chemoproteomic profiling reveals multiple target interactions of spongiolactone derivatives in leukemia cells
Source: Royal Society of Chemistry journal article supplement (doi:10.1039/c7cc04990k), 2017-01-01
Supplement: c7cc04990k5.xlsx [file c7cc04990k5.xlsx]

## Sheet: Key
Supplementary Table S4	Chemical proteomics with probe 3 in A549 cells and across all cell lines. Identification of proteins following labelling with 3, CuAAC, pull-down, tryptic digest and LC-MS/MS analysis.
Abbreviations	NaN = not a number (not quantified in proteomics); LFQ = label-free quantification using MaxQuant (log2 intensity)
Definitions	T-test enrichment X/Y = Log2(Mean LFQ sample X/Mean LFQ sample Y)
Experimental design	Experiments A, B, C, (E) are independent biological replicates: cells were labelled and harvested in separate experiments on different days. Sample lysis and downstream processing was performed together.
Contained in this spreadsheet:
Note that for data in this table label-free quantification was performed across all probe 3 datasets together.
T-test probe 3 in A549 cells	Filtering	Data were filtered to first retain only proteins with at least 2 razor+unique peptides in at all three replicates of either 3 or DMSO treated samples, and quantified in at least 3/3 biological replicates.
	Missing values imputation and t-test	Missing values were imputed from a normal distribution (width 0.3, downshift 1.8, across total dataset) and a two-sample t-test performed to compare DMSO and 3-treated samples: two sided, permutation-corrected (250 permutations), FDR 0.01, s0 1
Comparison across all cell lines (probe 3)	Individual T-tests	Individual data analysis and t-tests performed as described above with FDR 0.001, s0 2 for K562 and Jurkat cells, and FDR 0.01, s0 1 for A549 cells.
	Total dataset filtering and comparison	Total dataset was filtered for 3 valid values in probe or DMSO in any cell line. Missing values were imputed from a normal distribution (width 0.3, downshift 1.8, across total dataset) and cross-compared to the individual t-test data.
Leukemia hits	Proteins assigned as hits in both K562 and Jurkat cells; data cross-compared to A549 and probe 4.	Total dataset before imputation was cross-referenced to probe 4 dataset. Missing values were globally imputed ( (width 0.3, downshift 1.8, across total dataset). Leukemia hits were selected (48 hits - defined according to analysis in Table S2). LFQ intensities across replicates and across all DMSO samples were averaged (mean). Hierarchical clustering was performed on this data (See Supp. Fig. S7 …

## Sheet: Ttest A549
LFQ intensities (Log2)						T-test probe3 vs DMSO				Protein information
DMSO_A	DMSO_B	DMSO_C	probe3_A	probe3_B	probe3_C	Significant	Significant & Log2(enrichment) >2	-Log10 (p-value)	Difference	Protein IDs	Protein names	Gene names
24.6943	24.1643	23.5334	29.8152	29.6139	29.4825	+	+	4.02455	5.50653	Q53GQ0;E9PI21	Very-long-chain 3-oxoacyl-CoA reductase	HSD17B12
31.1822	23.1563	21.7793	31.1073	30.584	30.6978	+	+	0.858756	5.42376	P14550;V9GYG2;V9GYP9;Q5T621	Alcohol dehydrogenase [NADP(+)]	AKR1A1
22.514	22.8704	22.0234	27.6499	27.8583	27.8272	+	+	4.50949	5.30922	P16403;Q02539	Histone H1.2	HIST1H1C
23.1698	22.411	22.7776	28.2878	27.7262	27.7889	+	+	4.2755	5.14816	B1AKD8;Q5TZA2;A0A087WW81	Rootletin	CROCC
22.5209	22.8296	22.3948	26.8167	27.013	26.217	+	+	3.94733	4.10045	P21964;E7EMS6;E7EUU8;F8WBW9;H7BZ45	Catechol O-methyltransferase	COMT
22.4918	25.9382	25.4607	28.9481	28.6409	27.94	+	+	1.59131	3.87944	J3KNF8;H3BUX2;O43169;D6RFH4	Cytochrome b5 type B	CYB5B
23.5265	22.6971	23.359	26.9946	26.7529	27.1355	+	+	3.77277	3.7668	G3V434;G3V2L5;G3V4A6;G3XA86;Q9Y2Z9	Ubiquinone biosynthesis monooxygenase COQ6, mitochondrial	COQ6
22.9787	22.7734	22.6071	26.2534	26.6376	26.5329	+	+	4.70917	3.68823	P62854;Q5JNZ5	40S ribosomal protein S26;Putative 40S ribosomal protein S26-like 1	RPS26;RPS26P11
21.5113	23.6305	23.377	26.1571	26.1855	26.6349	+	+	2.15082	3.48624	Q16401;Q4VXH0;F2Z3J2	26S proteasome non-ATPase regulatory subunit 5	PSMD5
23.8755	23.0788	23.2772	27.2158	26.7788	26.5298	+	+	3.40883	3.43099	Q9BUN8;B4E1G1;E5RGY0	Derlin-1	DERL1
23.0357	24.7082	24.0302	26.8542	27.7994	26.9163	+	+	2.32742	3.26527	H7BXI1;A0A087WXU3;A0FGR8	Extended synaptotagmin-2	ESYT2
22.8482	23.8734	22.4642	26.4419	26.1657	26.2193	+	+	2.76978	3.21371	P14174	Macrophage migration inhibitory factor	MIF
23.4793	21.945	23.0427	25.6177	26.2183	26.1308	+	+	2.51879	3.16662	Q9P258	Protein RCC2	RCC2
21.3466	23.1437	22.3827	25.1132	25.594	25.5177	+	+	2.34456	3.11731	P35232;C9JW96;C9JZ20;E7ESE2;E9PCW0;D6RBK0	Prohibitin	PHB
23.3951	21.5532	23.2848	25.9771	25.9784	25.5913	+	+	2.15229	3.10456	I3L2C7;P57678;I3L4A4;I3L399;E7EN12;I3L4M4;I3L1J7	Gem-associated protein 4	GEMIN4
22.3265	22.6747	23.4458	25.8258	26.0406	25.7912	+	+	3.08026	3.0702	P49915	GMP synthase [glutamine-hydrolyzing]	GMPS
21.9359	22.4324	23.8863	25.8956	25.7342	25.8226	+	+	2.19266	3.0659	J3QS48;I3L295;J3KT75;J3QW43;J3QRD5;Q9H3L2;Q1HDL3;A0A087WV81;O75352;J3KSI4;I3L1D2;I3L4E0;J3KTK8;J3QQZ4;I3L405;I3L261	Mannose-P-dolichol utilization defect 1 protein	MPDU1;HBEBP2BPA
23.3865	22.7045	22.6788	25.544	25.8714	26.2259	+	+	3.20343	2.95718	A0A0C4DGX4;Q13616	Cullin-1	CUL1
22.431	22.7401	22.5306	25.5341	25.5967	25.1853	+	+	4.27822	2.87145	P62851	40S ribosomal protein S25	RPS25
23.0051	22.1392	21.673	25.1141	25.111	25.1533	+	+	2.72939	2.8537	Q14669;H7C2Y1;G5E9G6;C9JLJ5;C9JSX9;C9JLD7;F8W9P3;H7C1L9	E3 ubiquitin-protein ligase TRIP12	TRIP12
23.346	23.1919	23.0364	26.0363	26.1826	25.8838	+	+	4.66556	2.8428	B5MDU6;Q9H6V9;A0A0A0MSH6;B5MCU4;C9JUM0;C9JHU6;B5MCE2;B4DRG3;D3YTH1	UPF0554 protein C2orf43	LDAH;C2orf43
22.9334	22.4519	22.8012	25.1294	25.7989	25.7	+	+	3.42769	2.81395	P04899	Guanine nucleotide-binding protein G(i) subunit alpha-2	GNAI2
22.5336	22.5676	23.1729	25.5574	25.5885	25.3753	+	+	3.64244	2.74903	P25398	40S ribosomal protein S12	RPS12
22.348	24.2722	22.9997	26.0188	26.1075	25.7122	+	+	2.04503	2.73953	P30519;A0A087WT44;I3L159;I3L1F5;I3L4P8;I3L463;I3L1Y2;I3L276	Heme oxygenase 2	HMOX2
22.6824	23.662	23.8965	25.5075	26.5103	25.9281	+	+	2.25661	2.56834	Q0VF96	Cingulin-like protein 1	CGNL1
23.7473	22.7975	22.0776	25.3902	25.8825	25.034	+	+	2.03801	2.56144	Q9UBQ5;K7ES31;K7EQM4;A0A087WVB9;K7ERF1;B4DQ48;K7EK53	Eukaryotic translation initiation factor 3 subunit K	EIF3K
26.6947	26.7288	26.5551	29.4725	29.3095	28.8278	+	+	3.65134	2.54373	Q07065	Cytoskeleton-associated protein 4	CKAP4
23.2231	23.5382	24.3472	26.2518	25.7613	26.6005	+	+	2.42254	2.5017	Q01780;K7EJ37	Exosome component 10	EXOSC10
25.5848	22.8709	22.5514	25.8433	26.2188	26.2408	+	+	1.17765	2.43192	C9JJV6;C9JZL8;C9J5M0;C9JC07;Q96S97	Myeloid-associated differentiation marker	MYADM
23.0553	22.252	21.9153	24.8617	24.7119	24.9111	+	+	2.67048	2.42073	E7EMM4;Q13510	Acid ceramidase;Acid ceramidase subunit alpha;Acid ceramidase subunit beta	ASAH1
23.0252	22.8028	23.6476	25.3574	25.5082	25.8065	+	+	2.96117	2.39885	Q14166	Tubulin--tyrosine ligase-like protein 12	TTLL12
26.7444	26.2178	26.5919	29.2466	28.8808	28.3441	+	+	2.78378	2.3058	Q9NQC3;H7C106;A0A0U1RQR6	Reticulon-4	RTN4
22.8505	22.42	23.8656	25.5593	25.1614	25.2812	+	+	2.1709	2.28861	Q8TEQ8	GPI ethanolamine phosphate transferase 3	PIGO
23.5021	23.5061	21.9364	25.9034	24.9853	24.8795	+	+	1.67956	2.27454	A0A0J9YXN7;Q96Q06	Perilipin-4	PLIN4
23.1697	22.8342	23.363	24.8701	25.7948	25.2736	+	+	2.67949	2.19052	Q14CX7	N-alpha-acetyltransferase 25, NatB auxiliary subunit	NAA25
22.7843	23.895	23.9583	25.8634	25.6509	25.6094	+	+	2.28885	2.16201	H0Y5B4;H7BZ11;J3KQN4;Q969Q0;P83881;R4GN19	60S ribosomal protein L36a-like;60S ribosomal protein L36a	RPL36A;RPL36A-HNRNPH2;RPL36AL
22.5491	23.5149	22.8631	24.4898	24.8834	26.0242	+	+	1.78771	2.15678	H0Y4W2;F2Z2U4;Q9Y4A5	Transformation/transcription domain-associated protein	TRRAP
22.4725	22.4628	22.7282	24.8123	24.6155	24.5205	+	+	4.16786	2.09493	Q96K37;A0A0C4DGZ3;C9JK45	Solute carrier family 35 member E1	SLC35E1
23.6973	21.9875	22.7709	25.2487	24.8997	24.5857	+	+	1.7739	2.09282	Q99536;K7ERT7;K7ESA3;K7EJM4;K7ENX2;K7EM19	Synaptic vesicle membrane protein VAT-1 homolog	VAT1
23.3292	24.1181	23.3222	25.5828	25.5997	25.7646	+	+	2.79671	2.05921	O15143;C9JBJ7;C9K057;C9J4Z7;F8VXW2;C9JEY1;C9JQM8;C9JFG9;C9J6C8;C9JTT6	Actin-related protein 2/3 complex subunit 1B	ARPC1B
22.4112	22.8602	22.569	24.7934	24.7202	24.4346	+	+	3.54402	2.03593	Q9BYX2	TBC1 domain family member 2A	TBC1D2
23.2531	23.4602	22.7261	25.5774	25.1888	24.7181	+	+	2.43464	2.015	G3XAC6;Q14498;A0A0U1RQH7;H0Y4X3;A0A0U1RQW2;Q5QP23;Q5QP22;F8WF24;F2Z3E6;F2Z2Z5;A0A087X122;F8WF73;A8MYG5;G3V5Z6;H0YJJ3;G3XAP0;Q86U06	RNA-binding protein 39	RBM39
23.5029	22.26	23.2487	24.6551	25.3761	24.9675	+	+	2.00241	1.99573	A0A087WZZ5;Q13435;E9PPJ0;E9PJ04;H0YCG1;E9PJT3;H0YEX5;E9PIL8	Splicing factor 3B subunit 2	SF3B2
23.4219	24.2716	22.7975	25.4713	25.4079	25.4816	+		1.99001	1.95658	H0YMI6;H0YMA1;H0YMZ1;H0YL69;P25789;H0YLS6;H0YLC2;H0YKT8;H0YN18;H0YKS0	Proteasome subunit alpha type;Proteasome subunit alpha type-4;Proteasome subunit beta type	PSMA4
23.1967	23.6474	22.1912	25.0781	24.9258	24.8642	+		1.9552	1.94425	Q8N1G4	Leucine-rich repeat-containing protein 47	LRRC47
23.3422	22.856	23.265	25.1797	25.1463	24.812	+		3.23267	1.89163	Q07666;O75525;Q5VWX1	KH domain-containing, RNA-binding, signal transduction-associated protein 1	KHDRBS1
22.827	23.6941	22.98	24.7513	24.9525	25.3302	+		2.36421	1.84431	Q7LBC6;H0Y9V5	Lysine-specific demethylase 3B	KDM3B
27.4229	26.6852	26.6057	28.9895	28.6768	28.5325	+		2.47326	1.82833	Q9Y6C9	Mitochondrial carrier homolog 2	MTCH2
22.9662	23.0687	22.3075	24.5102	24.5543	24.7302	+		2.73552	1.81742	Q5SRN7;Q5SRN5;P16188;P13746;P04439	HLA class I histocompatibility antigen, A-30 alpha chain;HLA class I histocompatibility antigen, A-11 alpha chain;HLA class I histocompatibility antigen, A-3 alpha chain	HLA-A
23.2001	23.5582	23.138	25.0714	25.1827	24.8365	+		3.321	1.73144	E7ETY7;Q8TED1	Glutathione peroxidase;Probable glutathione peroxidase 8	GPX8
22.2425	22.2237	23.448	24.3987	24.3619	24.3296	+		1.88253	1.72533	Q8TB61	Adenosine 3-phospho 5-phosphosulfate transporter 1	SLC35B2
22.6608	22.9769	23.338	24.8304	24.5302	24.4984	+		2.73173	1.62775	Q9HDC9;H0Y512	Adipocyte plasma membrane-associated protein	APMAP
22.6996	22.8684	23.0685	24.5755	24.091	24.6339	+		2.81099	1.55464	I3L0N3;P46459;I3L2G1;I3L0L3;K7EQD6;I3L338;I3L4Q9	Vesicle-fusing ATPase	NSF
29.108	29.0651	29.1496	30.6614	30.5984	30.2573	+		3.40077	1.39813	Q01813;B1APP6;B1APP8;Q5VSR5;H0Y757;V9GYV7;V9GY25;H0Y3Y3	ATP-dependent 6-phosphofructokinase, platelet type	PFKP
23.029	22.8388	22.8562	24.2503	24.4609	24.1787	+		3.73692	1.38865	C9JNP9;Q92890;C9J6N9;C9IZG3	Ubiquitin fusion degradation protein 1 homolog	UFD1L
26.3997	26.5615	26.5074	27.9282	27.9075	27.7693	+		4.43385	1.3788	P50416;H3BMD2;H3BP22;H3BUV7;H3BUJ0;Q92523	Carnitine O-palmitoyltransferase 1, liver isoform	CPT1A
26.7438	26.2961	26.5979	25.184	25.0626	25.0746	+		3.32834	-1.43887	P42345;B1AKP8	Serine/threonine-protein kinase mTOR	MTOR
25.2787	25.3796	24.767	23.64	23.7546	21.6819	+		1.41064	-2.11626	A0A087WW14;Q0VDG4;F8W0M9;C9JID8;F8WBX0;C9JNS3;H9KVC8	Secernin-3	SCRN3
25.0818	25.3819	24.8011	22.5408	22.5068	23.3858	+		2.622	-2.27715	Q16762	Thiosulfate sulfurtransferase	TST
25.2636	24.7758	25.1634	23.0669	22.1253	22.928	+		2.69947	-2.36088	A0A087WVM4;B7ZM99;Q6UB35;H0Y327;Q4VXM0;Q5JYA8;Q5JYA3;Q4VXM1;Q4VXV2	Monofunctional C1-tetrahydrofolate synthase, mitochondrial	MTHFD1L
25.2729	25.4595	25.1073	22.9771	22.4514	22.1654	+		3.35331	-2.74864	Q9Y305;H7C5Q2;C9J7L8	Acyl-coenzyme A thioesterase 9, mitochondrial	ACOT9
25.4503	25.8484	25.634	22.0274	22.8347	22.1783	+		3.56811	-3.29746	Q8N3C0;E5RFZ0;J3KNJ4	Activating signal cointegrator 1 complex subunit 3	ASCC3
25.8536	25.9273	26.2942	22.2966	22.4903	23.2681	+		3.28774	-3.34	O43252	Bifunctional 3-phosphoadenosine 5-phosphosulfate synthase 1;Sulfate adenylyltransferase;Adenylyl-sulfate kinase	PAPSS1
27.1489	28.4898	29.0692	22.8509	24.166	22.7326	+		2.61696	-4.98615	Q6NUQ4;H7C085;H7C008;H7C0H8;H7BZI0	Transmembrane protein 214	TMEM214
23.0843	23.1449	22.7739	24.1968	23.7598	23.9369			2.30957	0.963486	Q8N2K0;I3L380;I3L294;Q5T712;I3L1V0	Monoacylglycerol lipase ABHD12	ABHD12
22.7473	23.0356	22.6079	24.0655	24.1726	24.2037			3.27959	1.35032	Q9NUJ1	Mycophenolic acid acyl-glucuronide esterase, mitochondrial	ABHD10
26.5271	21.8672	22.6603	26.3856	26.4179	26.4914			0.889147	2.74676	P10768;X6RA14;H7BZT7;U3KQT1	S-formylglutathione hydrolase	ESD
24.8933	25.4789	24.8039	25.131	24.7922	25.2836			0.0131789	0.0102336	Q86TI2;M0R2A8;M0R1L4;M0R162;M0QXI5	Dipeptidyl peptidase 9	DPP9
25.0837	24.9324	24.9742	25.3591	25.2715	25.188			1.83786	0.2761	A0A087X0W7;Q86TX2;G3V4F2;A0A087WT95;P49753	Acyl-coenzyme A thioesterase 1;Acyl-coenzyme A thioesterase 2, mitochondrial	ACOT2;ACOT1
26.2348	26.1529	26.2677	26.2982	26.1608	26.4098			0.37418	0.0711333	P48147	Prolyl endopeptidase	PREP
25.7824	26.2108	26.1077	26.0326	26.1029	26.1792			0.202308	0.0712662	C9JIF9;P13798;H7C1U0;H7C393;C9JLK2;H0YFE5;F8WEH5	Acylamino-acid-releasing enzyme	APEH
25.0029	24.871	24.8265	25.7234	25.2692	25.6302			1.90539	0.6408	A0A0R4J2G3;A0A0A0MTJ9;Q6PIU2;H7C046	Neutral cholesterol ester hydrolase 1	NCEH1
26.8143	26.4312	26.5235	26.7397	26.5062	26.9903			0.357799	0.155733	K7EJE8;K7EKE6;P36776;K7ER27;K7ER56;K7ERR6	Lon protease homolog, mitochondrial	LONP1
27.635	27.8649	27.9022	27.7621	27.7172	27.7757			0.224331	-0.0490341	P29144;Q5VZU9	Tripeptidyl-peptidase 2	TPP2
32.7612	32.8397	32.848	32.4375	32.6713	32.8568			0.576633	-0.1611	P49327;A0A0U1RQF0;A0A0U1RRG3;J3KTF0	Fatty acid synthase;[Acyl-carrier-protein] S-acetyltransferase;[Acyl-carrier-protein] S-malonyltransferase;3-oxoacyl-[acyl-carrier-protein] synthase;3-oxoacyl-[acyl-carrier-protein] reductase;3-hydroxyacyl-[acyl-carrier-protein] dehydratase;Enoyl-[acyl-carrier-protein] reductase;Oleoyl-[acyl-carrier-protein] hydrolase	FASN
23.603	23.7228	23.3972	23.4974	23.5691	23.511			0.190256	-0.0485001	P47712	Cytosolic phospholipase A2;Phospholipase A2;Lysophospholipase	PLA2G4A
24.5714	25.2345	24.8743	24.8482	25.0996	24.8495			0.0649982	0.0390333	O00154;K7EKP8	Cytosolic acyl coenzyme A thioester hydrolase	ACOT7
29.3345	29.2082	29.3095	29.4164	29.2341	29.3582			0.323588	0.0521673	P42704;B8ZZ38;A0A0C4DG06;C9JCA9;H7C3W8;A0A0C4DG51;Q9NP80	Leucine-rich PPR motif-containing protein, mitochondrial	LRPPRC
25.5781	23.0706	26.465	25.8093	26.6303	26.1156			0.476708	1.14716	Q9Y570	Protein phosphatase methylesterase 1	PPME1
26.6475	26.7846	26.8675	26.4653	26.7362	26.5093			0.864117	-0.196266	Q9Y6Y8;H7C0V8;A0A0C4DH82;H7C4C4	SEC23-interacting protein	SEC23IP
23.2795	23.4711	23.4392	24.4143	24.4576	24.5431			3.97167	1.07507	O43809;H3BV41;H3BND3	Cleavage and polyadenylation specificity factor subunit 5	NUDT21
25.6122	25.7111	25.6469	25.3388	26.1035	25.6342			0.0544099	0.0354335	A6NFX8;Q9UKK9;A6NJU6;A6NCQ0;H0YEY4;C9JYY9	ADP-sugar pyrophosphatase	NUDT5
26.7669	26.8238	26.6854	26.5702	26.861	26.8896			0.0464948	0.0149008	Q9NQW7;Q5T6H7;Q5T6H2;Q5T6H3;E9PFW2;O00462	Xaa-Pro aminopeptidase 1	XPNPEP1
27.962	27.7285	28.0677	28.1381	28.1196	28.1054			0.936705	0.201633	P18669;P15259;Q8N0Y7	Phosphoglycerate mutase 1	PGAM1
26.6447	27.1395	26.9028	27.1912	27.3992	27.2842			1.20018	0.395868	H0Y4R2;P16435;E7EMD0;E7EWU0	NADPH--cytochrome P450 reductase	POR
24.0288	24.2538	24.3262	23.5602	23.7295	22.91			1.40991	-0.803045	P40818	Ubiquitin carboxyl-terminal hydrolase 8	USP8
23.2268	23.8764	23.7542	24.2359	24.3272	24.3021			1.53476	0.669269	F5GYN4;J3KR44;Q96FW1;F5H6Q1;F5GYJ8;F5H3F0	Ubiquitin thioesterase OTUB1	OTUB1
24.899	23.2486	24.4762	25.321	24.7093	24.4399			0.477562	0.615457	Q9Y2Q3;E9PFN5;C9JNT3	Glutathione S-transferase kappa 1	GSTK1
24.6559	24.1928	24.7682	24.1669	24.0282	24.4352			0.705288	-0.328869	E9PGM4;Q04446	1,4-alpha-glucan-branching enzyme	GBE1
24.6871	25.0902	24.9032	24.7429	24.6032	24.6598			0.846698	-0.224866	P28072;A0A087X2I4;I3L3X7	Proteasome subunit beta type-6;Proteasome subunit beta type	PSMB6
23.6816	23.9324	23.3758	23.7906	23.5114	23.753			0.0403515	0.0217336	Q9NQR4;H7C579;F8WF70	Omega-amidase NIT2	NIT2
23.4926	23.4089	23.8742	23.5154	23.9779	24.0707			0.51551	0.262754	G5E9A6;P51784;Q5JXD3	Ubiquitin carboxyl-terminal hydrolase;Ubiquitin carboxyl-terminal hydrolase 11	USP11
24.585	25.2462	24.91	24.7012	24.9491	24.8391			0.153837	-0.0839329	Q14694;H3BQP1;J3KT19;H3BQC6;H3BNA1	Ubiquitin carboxyl-terminal hydrolase 10	USP10
25.8549	25.8534	25.8988	25.6632	25.6375	25.9137			0.664019	-0.130899	P30837;P47895;A0A0U1RQK9;H0YKF9	Aldehyde dehydrogenase X, mitochondrial	ALDH1B1
24.0228	24.2104	24.2621	24.3346	23.9177	24.9494			0.311912	0.235467	Q5TFE4;Q5QPD0;H0YDA5	5-nucleotidase domain-containing protein 1	NT5DC1
25.9321	25.6985	25.4653	25.8771	25.7964	25.5918			0.130274	0.0564671	P49902;Q5JUV4;Q5JUV6;S4R3E7;S4R3A6;H0YHR8;Q5JUV3	Cytosolic purine 5-nucleotidase	NT5C2
26.2773	26.6421	26.278	25.8931	26.9763	26.6949			0.129638	0.1223	P10599	Thioredoxin	TXN
25.2506	25.2525	25.2119	25.3544	25.3153	25.3239			2.1939	0.0928663	P78417;Q5TA02;Q5TA01	Glutathione S-transferase omega-1	GSTO1
26.6202	27.2815	27.6305	27.3164	27.118	27.248			0.0573295	0.0500666	Q06203;D6RCC8;D6RE15	Amidophosphoribosyltransferase	PPAT
26.4451	26.8765	26.9751	26.4447	26.6547	26.4745			0.616794	-0.240933	P54578;A6NJA2	Ubiquitin carboxyl-terminal hydrolase 14;Ubiquitin carboxyl-terminal hydrolase	USP14
25.5973	25.77	25.4786	25.5194	25.3366	25.1894			0.980539	-0.266834	P28074;H0YJM8	Proteasome subunit beta type-5	PSMB5
26.9045	27.1239	26.9173	27.2575	26.9135	26.9045			0.115397	0.0432669	P09936;D6RE83;D6R956;D6R974;D6RF53	Ubiquitin carboxyl-terminal hydrolase isozyme L1;Ubiquitin carboxyl-terminal hydrolase	UCHL1
27.4941	27.736	27.0444	27.3892	27.297	26.8288			0.401946	-0.253166	Q15084	Protein disulfide-isomerase A6	PDIA6
27.0665	27.1272	27.0107	26.9005	26.8969	26.9365			1.91995	-0.156833	P49189	4-trimethylaminobutyraldehyde dehydrogenase	ALDH9A1
26.0709	26.4952	26.4076	26.0475	26.2342	26.2394			0.451432	-0.150866	P46087;A0A087WV73;F5GWB7;F5H709;F5H5X6;F5GYR3;F5H359;F5H8G6	Probable 28S rRNA (cytosine(4447)-C(5))-methyltransferase	NOP2
27.7125	27.7223	27.6315	27.6779	27.3403	27.4576			0.890255	-0.196833	P05091;F8VP50;S4R3S4;H0Y2X5	Aldehyde dehydrogenase, mitochondrial	ALDH2
27.2034	27.2554	27.3803	26.9884	27.2537	27.0891			0.84076	-0.1693	Q93009;H3BND8;F5H2X1;H3BUV0;H3BTM1;H3BRA2;H3BQD1;I3L2D8	Ubiquitin carboxyl-terminal hydrolase 7;Ubiquitin carboxyl-terminal hydrolase	USP7
30.5627	30.4624	30.431	30.8243	30.6224	30.4915			0.700365	0.1607	P04406;E7EUT5;O14556	Glyceraldehyde-3-phosphate dehydrogenase	GAPDH
27.7782	28.0143	27.8864	27.7869	27.969	28.1497			0.237996	0.0755666	O15067;H0YGH1;J3KT98;J3QSG0;J3QSH6;J3KTQ5;J3KTL4	Phosphoribosylformylglycinamidine synthase	PFAS
28.1644	28.2404	28.4578	28.1283	28.1915	28.1873			0.585964	-0.1185	P30101	Protein disulfide-isomerase A3	PDIA3
27.8496	27.9599	28.0318	27.9071	28.0926	28.2642			0.535903	0.140867	P07237;H7BZ94;H0Y3Z3;I3L398;I3L312;I3L4M2;I3NI03;I3L0S0;I3L3P5;I3L3U6	Protein disulfide-isomerase	P4HB
30.1764	29.9302	29.9386	30.4275	30.2631	30.2164			1.30647	0.287266	O60701;E7ER83;E7ETF4;E7EV97;E7ER95;D6RHF4;E9PBD2	UDP-glucose 6-dehydrogenase	UGDH
28.269	28.7358	28.5294	28.2445	28.4	28.5888			0.234956	-0.1003	Q14697;F5H6X6	Neutral alpha-glucosidase AB	GANAB
27.397	27.3099	27.3621	27.2218	27.4143	27.5059			0.0998335	0.0243333	Q93008;H7C2M9	Probable ubiquitin carboxyl-terminal hydrolase FAF-X	USP9X
29.1462	29.3706	29.1373	28.746	29.3085	29.3455			0.151636	-0.0846996	P45974;F5H571;H7C5J3	Ubiquitin carboxyl-terminal hydrolase 5	USP5
34.552	34.7303	34.5234	34.4951	34.4957	34.7382			0.0876245	-0.0255661	P00352;Q5SYQ9;Q5SYQ8	Retinal dehydrogenase 1	ALDH1A1
30.3226	30.423	30.5106	29.9231	30.2559	30.3964			0.686062	-0.226933	P27708;F8VPD4;H7C3Z5;H7BZB3;H7C2E4	CAD protein;Glutamine-dependent carbamoyl-phosphate synthase;Aspartate carbamoyltransferase;Dihydroorotase	CAD
24.2225	24.3068	24.4389	22.7767	23.2411	23.2893			2.65175	-1.22035	A6NHR9;J3KTL8;J3KRK8;J3QSH1	Structural maintenance of chromosomes flexible hinge domain-containing protein 1	SMCHD1
24.1493	24.5749	24.6962	23.7963	22.3678	23.0816			1.45401	-1.39156	A0A087WZT3;Q9H3K6;H3BV85;H3BTW0;A0A0B4J295;H3BVE0	BolA-like protein 2	BOLA2;BOLA2B
23.8238	24.2197	24.3377	22.6676	23.2954	22.5109			1.98521	-1.30243	D6R9P3;D6RD18;D6RBZ0;A0A087WZV1;Q99729	Heterogeneous nuclear ribonucleoprotein A/B	HNRNPAB
23.6972	24.0424	23.9089	22.4051	23.7463	23.395			0.780542	-0.700673	E9PL78;E9PJM1;E9PMQ9;E9PSI1;O15321;E9PJC4;E9PQY7;E9PS99;G3V1B9	Transmembrane 9 superfamily member 1	TM9SF1
23.0781	23.5541	23.5735	22.8396	23.0977	22.5625			1.19392	-0.568637	O76071	Probable cytosolic iron-sulfur protein assembly protein CIAO1	CIAO1
24.513	24.815	24.7044	23.9538	22.6447	23.092			1.67039	-1.44728	P31947	14-3-3 protein sigma	SFN
22.3016	23.1667	22.5644	23.1084	23.8839	23.2192			0.965171	0.726268	P48735;H0YL11	Isocitrate dehydrogenase [NADP], mitochondrial	IDH2
24.6217	25.8012	25.4916	22.3619	24.1932	23.4036			1.4478	-1.98525	A0A0B4J1Z1;C9JAB2;Q16629	Serine/arginine-rich splicing factor 7	SRSF7
24.2663	24.1798	24.6155	23.8531	23.2133	23.9878			1.15047	-0.669159	E7EPN9;Q9Y520;H7C5N8	Protein PRRC2C	PRRC2C
24.945	24.5711	24.6436	24.5525	22.4528	23.1875			0.990904	-1.32229	Q9HC35;B5MBZ0	Echinoderm microtubule-associated protein-like 4	EML4
23.7429	25.249	24.9024	25.962	24.7852	23.2247			0.00931641	0.0258757	Q9H6R4;A0A0A0MRW6;A0A0C4DFX0	Nucleolar protein 6	NOL6
23.3693	23.8771	23.587	23.4034	21.9028	23.6733			0.469441	-0.61798	E9PPW7;O00217;E9PN51;F8W9K7;E9PKH6	NADH dehydrogenase [ubiquinone] iron-sulfur protein 8, mitochondrial	NDUFS8
25.3798	25.3199	25.1701	25.535	22.2823	25.9297			0.241113	-0.707615	F8W1A4;P54819;F8VZG5;F8VY04;G3V213;F8VPP1	Adenylate kinase 2, mitochondrial;Adenylate kinase 2, mitochondrial;Adenylate kinase 2, mitochondrial, N-terminally processed	AK2
24.9779	24.7686	24.7424	24.7593	22.5043	24.8542			0.439407	-0.79037	P07954	Fumarate hydratase, mitochondrial	FH
24.9853	25.2834	24.6571	25.2403	24.5014	22.7148			0.460979	-0.823098	Q5RI15	Cytochrome c oxidase protein 20 homolog	COX20
23.0917	23.8756	23.2571	22.7361	22.6795	23.8394			0.292951	-0.323132	E7EUL7;E9PHV5;P28290;H7BZ26	Sperm-specific antigen 2	SSFA2
24.5135	24.8461	24.3904	22.9442	23.0419	24.4382			1.0385	-1.10857	O94855;E9PDM8;E9PC44	Protein transport protein Sec24D	SEC24D
25.1621	25.7019	25.4007	22.6652	25.4953	25.0996			0.484865	-1.00152	O15355	Protein phosphatase 1G	PPM1G
23.0198	23.6582	23.5063	22.5481	22.3377	23.0991			1.15819	-0.733133	A0A024R7W5;A0A087X0Q1;A0A087WY31;Q7Z739	YTH domain-containing family protein 3	YTHDF3
21.7752	22.9702	21.3183	23.5725	23.9109	23.6353			1.54322	1.685	C9JJ34;C9JDM3;F6WQW2;P43487;C9JIC6;C9JXG8;C9JGV6	Ran-specific GTPase-activating protein	RANBP1
21.9257	22.6325	22.464	23.4234	23.7726	23.513			2.1784	1.22892	Q8WWI5	Choline transporter-like protein 1	SLC44A1
22.6903	23.1314	23.4361	24.8164	24.4817	24.4944			2.47106	1.51155	O14828	Secretory carrier-associated membrane protein 3	SCAMP3
23.1429	24.3511	22.5298	23.4851	23.641	23.7078			0.191973	0.270049	A0A0M3HER1;P48059;A0A087X2F9;A0A0J9YXC7;Q7Z4I7;H0Y592	LIM and senescent cell antigen-like-containing domain protein 1;LIM and senescent cell antigen-like-containing domain protein 2	LIMS1;LIMS2
22.8482	23.3115	23.7519	24.2813	24.6092	24.7047			1.87161	1.22786	O15270;H0YJV2	Serine palmitoyltransferase 2	SPTLC2
23.6368	22.1698	23.0991	23.5858	23.4847	23.5882			0.609789	0.58433	O95081;A0A0C4DG34	Arf-GAP domain and FG repeat-containing protein 2	AGFG2
23.6419	23.5794	22.6933	24.9445	24.6777	25.1837			2.06434	1.63046	Q5T7C4;P09429;B2RPK0	High mobility group protein B1;Putative high mobility group protein B1-like 1	HMGB1;HMGB1P1
22.2466	22.9061	22.1574	23.7142	23.7769	23.8899			2.30596	1.35696	P35270	Sepiapterin reductase	SPR
23.6456	22.9202	23.3399	23.8702	23.3769	23.4506			0.434151	0.263999	P60468;S4R3B5	Protein transport protein Sec61 subunit beta	SEC61B
22.9363	22.6855	23.5399	23.7937	23.8846	23.7669			1.38679	0.761181	P61457	Pterin-4-alpha-carbinolamine dehydratase	PCBD1
22.8529	23.4938	24.1278	24.6974	25.1833	24.779			1.60761	1.39507	Q04917;A2IDB2	14-3-3 protein eta	YWHAH
23.1424	24.3387	22.0329	24.7499	25.1257	25.0159			1.24665	1.79249	Q13586;G0XQ39;E9PNJ4;H0YDB2;E9PIQ8;E9PRE4;E9PR07;E9PJ19;E9PMB4;E9PRZ7;E9PR09;E9PN27	Stromal interaction molecule 1	STIM1
21.5902	22.9805	23.7501	23.4794	23.3901	23.431			0.448855	0.659896	P61026	Ras-related protein Rab-10	RAB10
25.3872	25.7659	22.7222	25.66	25.274	25.534			0.375875	0.86425	P11766;H0YAG8;D6RFE4;D6RAY0;D6R9G2	Alcohol dehydrogenase class-3	ADH5
24.8236	23.0503	24.7929	24.6849	24.469	24.757			0.281926	0.414696	B4DK25;B4E107;F5GXE4;H0Y5C2;O95260;Q5SQQ1	Arginyl-tRNA--protein transferase 1	ATE1
25.1264	23.9632	24.8965	25.6013	25.4264	25.4604			1.09021	0.833997	P13796;Q5TBN3;Q5TBN5;C9JAM8	Plastin-2	LCP1
23.2011	23.3138	23.335	24.1917	23.4609	23.3757			0.680714	0.3928	P53007;B4DP62	Tricarboxylate transport protein, mitochondrial	SLC25A1
22.7528	23.9588	24.2761	24.3879	24.8825	24.3135			0.80486	0.865386	F6S8N6;A0A0A0MRJ6;H7BY58;P22061;C9J0F2	Protein-L-isoaspartate O-methyltransferase;Protein-L-isoaspartate(D-aspartate) O-methyltransferase	PCMT1
27.1626	27.1277	27.1114	27.1748	27.0621	27.0387			0.398205	-0.0420335	P09972;K7EKH5;C9J8F3;J3KSV6;J3QKP5;A8MVZ9	Fructose-bisphosphate aldolase C;Fructose-bisphosphate aldolase	ALDOC
23.4925	27.5245	26.8516	27.5919	27.7094	27.6251			0.605642	1.68594	Q3ZCM7;A0A075B736;Q5SQY0	Tubulin beta-8 chain	TUBB8
23.4491	23.4795	23.8637	23.4851	23.5423	23.9267			0.10064	0.0539328	H0YM70;A0A087X1Z3;Q9UL46;H0YKU2	Proteasome activator complex subunit 2	PSME2
23.1634	23.7043	23.6512	23.298	23.5386	23.2818			0.281231	-0.1335	A0A0A0MRP6;B7ZLQ5;P28370	Probable global transcription activator SNF2L1	SMARCA1
23.8209	23.6967	23.8326	23.6583	24.1755	23.7624			0.191818	0.0820007	A0A0C4DGS1;P39656;U3KQ84	Dolichyl-diphosphooligosaccharide--protein glycosyltransferase 48 kDa subunit	DDOST
24.928	25.268	25.1713	24.8655	25.1491	25.4856			0.0756716	0.0442994	A2AEA2;P10321;O19617;Q31612;Q09160;F8W9Z8;A0A0G2JKJ1;P30499	HLA class I histocompatibility antigen, Cw-7 alpha chain;HLA class I histocompatibility antigen, B-73 alpha chain	HLA-C;HLA-B
27.2756	28.0278	28.1021	27.6337	27.8935	27.7981			0.0328515	-0.026734	B2R4S9;U3KQK0;Q99880;Q99879;Q99877;Q93079;Q8N257;Q5QNW6;Q16778;P62807;P58876;P57053;P33778;P23527;P06899;O60814;Q96A08	Histone H2B;Histone H2B type 1-L;Histone H2B type 1-M;Histone H2B type 1-N;Histone H2B type 1-H;Histone H2B type 3-B;Histone H2B type 2-F;Histone H2B type 2-E;Histone H2B type 1-C/E/F/G/I;Histone H2B type 1-D;Histone H2B type F-S;Histone H2B type 1-B;Histone H2B type 1-O;Histone H2B type 1-J;Histone H2B type 1-K;Histone H2B type 1-A	HIST1H2BI;HIST1H2BN;HIST1H2BL;HIST1H2BM;HIST1H2BH;HIST3H2BB;HIST2H2BF;HIST2H2BE;HIST1H2BC;HIST1H2BD;H2BFS;HIST1H2BB;HIST1H2BO;HIST1H2BJ;HIST1H2BK;HIST1H2BA
23.3802	23.9449	24.441	23.4738	23.6054	23.9506			0.294371	-0.245447	B8ZZJ0;B9A032;B8ZZN6;P63165	Small ubiquitin-related modifier 1	SUMO1
23.9824	24.1118	24.5274	24.1436	24.6721	24.5537			0.470465	0.249267	C9J712;C9J0J7;C9JQ45;G5E9Q6;P35080;C9J2N0	Profilin;Profilin-2	PFN2
24.3619	24.7913	24.4233	24.7127	24.7102	24.7442			0.663175	0.196866	Q5JR07;C9JNR4;E9PQH6;C9JX21;Q5JR08;Q5JR05;P61586;P08134;E9PLA2;C9JRM1;Q5JR06;E9PN11;U3KQA9;U3KQV3	Transforming protein RhoA;Rho-related GTP-binding protein RhoC	RHOC;RHOA
23.8808	23.681	24.0905	24.0004	24.6145	24.2071			0.838817	0.389889	C9JXB8;C9JNW5;P83731	60S ribosomal protein L24	RPL24
23.9208	24.0276	23.6486	23.7618	23.5823	23.9365			0.278477	-0.105466	E5RHW4;O94905;B0QZ43;E5RJ09	Erlin-2	ERLIN2;ERLIN1
23.517	23.5442	23.3504	23.6691	23.4951	23.6332			0.731747	0.128599	E9PF19;Q9Y4P3;Q96E41;A0A087WXC6	Transducin beta-like protein 2	TBL2
24.3962	24.6995	24.4809	24.4443	24.7372	24.4592			0.0562057	0.0213668	E9PLA9;Q14444	Caprin-1	CAPRIN1
24.4583	24.4125	24.5429	24.372	24.8809	24.8184			0.595035	0.219199	E9PNW4;E9PR17;P13987;H0YET2	CD59 glycoprotein	CD59
24.7544	24.9224	24.908	25.0983	24.6966	24.6432			0.115889	-0.0489	G3V0E4;O75439;F8WAZ6;F8WEA6;F8WBE1	Mitochondrial-processing peptidase subunit beta	PMPCB
25.4122	25.6194	25.6502	25.0658	23.6775	25.4376			0.703241	-0.833619	H0YDU8;P53041;A8MU39	Serine/threonine-protein phosphatase;Serine/threonine-protein phosphatase 5	PPP5C
22.8263	24.1445	23.6395	24.5093	24.5035	24.5691			1.21041	0.990505	H7C0G1;Q9H330;F8WBJ7	Transmembrane protein 245	TMEM245
24.0149	24.1587	23.806	24.34	24.1649	23.6075			0.0632114	0.0442664	J3QK89;Q8IWX8	Calcium homeostasis endoplasmic reticulum protein	CHERP
24.1884	24.2441	24.3724	24.2321	24.3335	23.1025			0.403131	-0.378941	K7EQ02;K7EQ55;K7EK33;Q96EP5	DAZ-associated protein 1	DAZAP1
26.3775	26.5958	26.2872	26.3716	26.4011	26.6899			0.188352	0.0673656	K7ELQ9;Q6UW68;K7ER05;K7EJQ9;K7EM09;K7EMV9;K7EPR0	Transmembrane protein 205	TMEM205
24.9867	25.263	25.3334	24.9913	25.2947	25.4109			0.0818356	0.0379333	O43865	Putative adenosylhomocysteinase 2	AHCYL1
24.2565	24.4616	24.6204	24.7188	24.5602	25.3449			0.752271	0.428467	O95674	Phosphatidate cytidylyltransferase 2	CDS2
24.9871	24.918	24.7314	25.1068	24.6677	24.5328			0.2267	-0.109733	P00403	Cytochrome c oxidase subunit 2	MT-CO2
25.2688	25.8047	25.3325	25.4451	25.058	25.456			0.28044	-0.148967	P03905	NADH-ubiquinone oxidoreductase chain 4	MT-ND4
24.0206	24.231	24.3707	24.1567	24.3481	24.2224			0.108743	0.0349668	P05387;H0YDD8	60S acidic ribosomal protein P2	RPLP2
25.026	25.3556	25.1549	25.0141	25.1703	24.94			0.512517	-0.137367	P07858;R4GMQ5;E9PR54;E9PJ67;E9PCB3;E9PKQ7;E9PNL5;E9PHZ5;E9PLY3;E9PSG5;E9PQM1	Cathepsin B;Cathepsin B light chain;Cathepsin B heavy chain	CTSB
25.7847	25.5517	25.6635	23.5258	25.4516	25.2928			0.664286	-0.909917	P21912;A0A087WXX8	Succinate dehydrogenase [ubiquinone] iron-sulfur subunit, mitochondrial	SDHB
23.0944	23.4998	23.5484	23.1923	23.6903	23.433			0.101884	0.0576668	P48960	CD97 antigen;CD97 antigen subunit alpha;CD97 antigen subunit beta	CD97
22.4763	23.77	23.4858	23.4595	23.7487	23.6376			0.389908	0.371232	P52594;C9J2I0;B8ZZY2	Arf-GAP domain and FG repeat-containing protein 1	AGFG1
24.8659	25.3416	25.4845	25.0155	25.2981	25.1213			0.157088	-0.085701	P53985;Q5T8R5;Q5T8R3	Monocarboxylate transporter 1	SLC16A1
26.9191	26.9507	27.1933	26.9663	27.3592	27.2947			0.550395	0.185699	P60866;E5RJX2;E5RIP1;G3XAN0	40S ribosomal protein S20	RPS20
24.0839	23.9452	23.8458	23.9323	22.7863	23.2868			0.854772	-0.623164	P61353;K7ELC7;K7EQQ9;K7ERY7	60S ribosomal protein L27	RPL27
23.8473	24.3718	26.3944	26.1668	26.0539	26.441			0.793893	1.3494	P62263;E5RH77;H0YB22	40S ribosomal protein S14	RPS14
24.3037	24.892	24.7232	24.25	24.8652	24.8012			0.0010361	-0.000832876	P62318;H3BT13	Small nuclear ribonucleoprotein Sm D3	SNRPD3
23.8601	24.2246	24.5605	23.624	23.6301	23.7166			1.28039	-0.558166	P81605	Dermcidin;Survival-promoting peptide;DCD-1	DCD
25.7323	26.0183	26.2426	26.2487	25.4612	25.4618			0.382417	-0.273833	Q09028;H0YF10;H0YEU5;H0YCT5;H0YDK2;E9PNS2;E9PIC4;E9PNS6	Histone-binding protein RBBP4	RBBP4
25.148	25.1863	25.1064	24.7187	25.0814	25.6664			0.010229	0.00860023	Q10471;F8VUJ3;Q8N4A0	Polypeptide N-acetylgalactosaminyltransferase 2;Polypeptide N-acetylgalactosaminyltransferase 2 soluble form	GALNT2
24.0862	24.658	24.7976	24.5673	24.8409	24.3112			0.0784275	0.0591997	Q12874	Splicing factor 3A subunit 3	SF3A3
24.0088	24.0968	24.2119	24.324	24.4191	24.0045			0.444823	0.143366	Q3ZCQ8;M0R003;M0R0C3;M0QXC3;M0R2Z3;M0R303;M0R2D2;M0R2F8;M0R047;M0R1Y4	Mitochondrial import inner membrane translocase subunit TIM50	TIMM50
30.6034	30.5464	31.0165	30.1778	30.3153	30.626			0.812704	-0.349067	Q5SYQ7		ALDH1A1
23.7505	24.2096	23.9648	24.2025	23.6897	24.1159			0.0458886	0.0277328	Q6PCE3	Glucose 1,6-bisphosphate synthase	PGM2L1
23.2035	23.0886	23.0234	23.5974	23.3886	23.9259			1.49306	0.532139	Q8N357;F8WCT7	Solute carrier family 35 member F6	SLC35F6
21.3624	23.9772	24.2208	24.5429	23.7582	24.0172			0.414431	0.919286	Q8TC12;G3V2G6;G3V234;H0YJ10;H0YIZ8;H0YJ46	Retinol dehydrogenase 11	RDH11
23.5686	24.1493	23.5663	23.7023	23.0752	23.0889			0.767385	-0.4726	Q9UGI8;F8W7T0	Testin	TES
23.8565	23.775	23.6673	23.9704	23.8759	23.9121			1.17472	0.1532	Q9Y320;E9PSF0;E9PRL5;H3BSU7;E9PLR1;G3V155	Thioredoxin-related transmembrane protein 2	TMX2
23.4785	23.3613	23.5187	24.4871	24.5373	24.4075			4.14768	1.02446	Q9Y4W2	Ribosomal biogenesis protein LAS1L	LAS1L
25.1668	25.5508	25.1069	25.2167	24.9505	25.5146			0.0782381	-0.0475661	P62140;E7ETD8;C9J9S3;C9JP48	Serine/threonine-protein phosphatase PP1-beta catalytic subunit;Serine/threonine-protein phosphatase	PPP1CB
23.6539	23.8388	23.4639	23.709	23.3996	23.7539			0.0706888	-0.031367	F5H4B6;Q8IZ83	Aldehyde dehydrogenase family 16 member A1	ALDH16A1
25.7537	26.1707	26.2628	25.8324	26.3765	26.065			0.0444095	0.0288995	O00767	Acyl-CoA desaturase	SCD
24.4701	24.4156	24.4973	24.5878	24.769	24.6052			1.43562	0.193	P61081;M0QYI6	NEDD8-conjugating enzyme Ubc12	UBE2M
24.1128	24.8279	23.5117	22.5646	22.6908	24.5831			0.504356	-0.871292	O76024;H0Y9G5	Wolframin	WFS1
24.5255	24.5295	24.6603	23.7076	24.6068	24.5172			0.436191	-0.294566	P20073	Annexin A7	ANXA7
23.8066	23.4726	23.2548	23.9907	23.2189	22.9983			0.115882	-0.108716	P31937;H7BZL2	3-hydroxyisobutyrate dehydrogenase, mitochondrial	HIBADH
27.1542	27.2737	27.8479	27.5907	27.8652	27.4828			0.383295	0.220966	A0A0U1RR32;A0A0U1RRH7;Q99878;Q96KK5;Q9BTM1;Q93077;Q7L7L0;P20671;P0C0S8;P04908;H0YFX9;Q16777;Q6FI13;P16104;Q8IUE6	Histone H2A type 1-J;Histone H2A type 1-H;Histone H2A.J;Histone H2A type 1-C;Histone H2A type 3;Histone H2A type 1-D;Histone H2A type 1;Histone H2A type 1-B/E;Histone H2A;Histone H2A type 2-C;Histone H2A type 2-A;Histone H2AX;Histone H2A type 2-B	HIST1H2AJ;HIST1H2AH;H2AFJ;HIST1H2AC;HIST3H2A;HIST1H2AD;HIST1H2AG;HIST1H2AB;HIST2H2AC;HIST2H2AA3;H2AFX;HIST2H2AB
23.9773	24.6297	24.6837	24.6925	25.1095	24.7545			0.739951	0.421933	C9J4Z3;P61513;M0R0A1;Q6P4E4;E9PEL3;M0R2L6;G5E9R3;A6NKH3	60S ribosomal protein L37a	RPL37A
24.3448	24.1102	24.5834	24.6919	23.9729	24.2835			0.0410475	-0.0300337	Q00688	Peptidyl-prolyl cis-trans isomerase FKBP3	FKBP3
24.0872	24.044	24.203	23.8677	23.9021	24.0591			1.0459	-0.168434	Q02750	Dual specificity mitogen-activated protein kinase kinase 1	MAP2K1
25.7239	26.0078	26.0884	26.2213	26.4753	23.2101			0.238144	-0.637794	Q14103;H0YA96;D6RAF8;H0Y8G5;D6RD83;D6RF44;D6RBQ9	Heterogeneous nuclear ribonucleoprotein D0	HNRNPD
24.3209	24.2075	24.4104	24.5134	24.5237	24.5106			1.58385	0.202966	Q8TCS8;F8WBI3;H7BXF6	Polyribonucleotide nucleotidyltransferase 1, mitochondrial	PNPT1
24.3673	24.6823	24.6199	24.4107	24.8675	25.155			0.464077	0.254567	Q969Z0;C9J7P5;C9J5A2;C9J347;C9IZN7;H7C4R5	Protein TBRG4	TBRG4
23.9653	24.5083	24.3031	24.0933	24.6204	23.868			0.0841902	-0.0650005	Q96LD4;A0A0M3HER3	Tripartite motif-containing protein 47	TRIM47
25.6587	25.7997	26.1001	26.1001	25.7768	25.9653			0.231213	0.0945663	Q9UG63;C9JHK9;C9JZV3	ATP-binding cassette sub-family F member 2	ABCF2
25.6008	25.4187	25.5078	25.6584	25.8702	25.4028			0.392049	0.1347	P23284	Peptidyl-prolyl cis-trans isomerase B	PPIB
25.8094	25.6075	25.5868	25.2855	25.2758	25.2162			2.27514	-0.408733	P09382	Galectin-1	LGALS1
25.3354	25.1031	24.7965	24.9367	25.0437	25.0338			0.174616	-0.0735995	Q8NDH3;H0YEP3	Probable aminopeptidase NPEPL1	NPEPL1
25.1312	25.1474	25.2825	24.01	23.8724	23.3241			2.60112	-1.45156	O75367;B4DJC3;D6RCF2;Q5SQT3;Q9P0M6	Core histone macro-H2A.1;Histone H2A	H2AFY
23.2916	23.779	22.4823	24.2505	24.3465	24.1864			1.32315	1.07682	E9PC52;Q16576;Q5JP01;Q5JNZ6;Q5JP02	Histone-binding protein RBBP7	RBBP7
23.5878	23.6983	23.3686	23.8389	23.9439	24.0503			1.5765	0.392793	Q15424;Q14151	Scaffold attachment factor B1;Scaffold attachment factor B2	SAFB;SAFB2
22.4632	24.0429	21.1536	25.0814	24.3002	24.2959			1.07749	2.00594	R4GMT0;P61163	Alpha-centractin	ACTR1A
24.4874	24.4091	23.7556	24.4297	24.1801	24.026			0.00686152	-0.00543658	G3V1D3;G3V180;Q9NY33;E9PNX5;E9PKK8;E9PQ14;E9PPK9	Dipeptidyl peptidase 3	DPP3
23.1926	23.2165	23.1599	23.6833	23.7338	23.5909			3.35996	0.479674	P51570;K7ERJ9;K7EII7	Galactokinase	GALK1
24.4546	24.5755	24.2452	24.501	24.4634	24.2729			0.0358694	-0.0126667	I3L1P8;Q02978	Mitochondrial 2-oxoglutarate/malate carrier protein	SLC25A11
23.4064	23.3508	23.9636	23.9508	23.5951	23.381			0.0956999	0.0686951	O00291	Huntingtin-interacting protein 1	HIP1
25.0511	25.1126	25.025	25.6261	24.4907	25.2258			0.0529613	0.0513	Q16822;H0YML5;B4DW73;A0A0A0MS74;H0YM31;H0YMU6;H0YNG4;H0YMA5	Phosphoenolpyruvate carboxykinase [GTP], mitochondrial	PCK2
25.6759	25.7073	25.683	25.7551	25.4407	25.7366			0.164084	-0.0445995	P78347	General transcription factor II-I	GTF2I
25.2962	24.8106	25.0869	25.1204	24.7327	24.8657			0.365669	-0.1583	Q12904;D6R937	Aminoacyl tRNA synthase complex-interacting multifunctional protein 1;Endothelial monocyte-activating polypeptide 2	AIMP1
24.9109	24.782	24.6342	27.7255	27.6099	23.4607			0.457428	1.48968	Q13423;E9PCX7;D6RHU2;D6RAI5;H0Y8P5;D6RCR6	NAD(P) transhydrogenase, mitochondrial	NNT
24.657	24.4775	23.8778	24.1891	24.2388	24.3945			0.0927038	-0.0632998	Q96T51;H0YAC8;J3KPP6;H0Y9Y8;H0YA47	RUN and FYVE domain-containing protein 1	RUFY1
22.5041	22.961	23.0709	24.2175	24.223	24.4065			2.83561	1.43699	Q460N5;H7C5R8;H7C4Y3	Poly [ADP-ribose] polymerase 14	PARP14
23.8912	23.4898	22.9848	23.2736	23.5629	23.5236			0.00227506	-0.00193278	P48507	Glutamate--cysteine ligase regulatory subunit	GCLM
22.7025	22.2801	22.6836	23.6024	23.5329	23.8838			2.51443	1.11762	Q5SQP8;P56545	C-terminal-binding protein 2	CTBP2
25.5182	25.8748	25.3932	25.0101	25.1581	25.3699			1.09838	-0.416033	Q12788;J3KNP2	Transducin beta-like protein 3	TBL3
24.4954	24.9924	24.7214	24.1499	24.0793	24.1355			1.87465	-0.614833	P21291;E9PS42;E9PND2;E9PP21	Cysteine and glycine-rich protein 1	CSRP1
23.8896	23.9021	23.9835	23.8949	23.9339	24.1454			0.327897	0.0663211	Q8NBJ5;M0QX72;M0QYH0	Procollagen galactosyltransferase 1	COLGALT1
24.3746	24.3454	24.4024	24.3019	24.3955	24.5229			0.18875	0.0326341	Q96HS1;F5GXG4	Serine/threonine-protein phosphatase PGAM5, mitochondrial	PGAM5
25.9955	26.7667	26.6784	25.672	26.4973	26.6506			0.205209	-0.2069	Q07021;I3L3Q7;I3L3B0	Complement component 1 Q subcomponent-binding protein, mitochondrial	C1QBP
23.6194	23.9855	23.8482	23.9057	23.9262	24.4219			0.598018	0.2669	O95433;G3V438;H0YJG7;H0YJ63;G3V3W9;H0YJU2	Activator of 90 kDa heat shock protein ATPase homolog 1	AHSA1
24.6099	24.9642	24.8894	24.7798	25.1361	24.8133			0.220443	0.0885671	Q9BXP5;H7C3A1;H7C1K0;H7C0U8	Serrate RNA effector molecule homolog	SRRT
24.8742	24.8116	25.9757	22.3236	25.6825	25.8941			0.18399	-0.587104	E7EMW7;O95071;E7ET84;E5RFK7;H0YBB4	E3 ubiquitin-protein ligase UBR5	UBR5
24.6323	24.9901	25.027	24.7656	24.4744	25.1378			0.146648	-0.0905336	Q8IY37;F5H3Y4	Probable ATP-dependent RNA helicase DHX37	DHX37
23.3895	21.7565	22.8258	23.3617	24.1598	24.0502			1.04364	1.19995	J3KNG9;P04920;H7C1Z2;E9PCP1;F8WD49;P48751	Anion exchange protein;Anion exchange protein 2	SLC4A2
23.6672	24.0859	24.2826	23.6833	24.258	24.1929			0.043617	0.0328267	S4R3H4;E7EQT4;Q9UKV3;G3V3B0;A0A087WYN3;G3V3T3	Apoptotic chromatin condensation inducer in the nucleus	ACIN1
25.0154	24.8398	24.7637	25.2545	24.9678	25.0492			0.895494	0.217533	Q14019;H3BT58	Coactosin-like protein	COTL1
23.1946	25.7858	25.1511	25.0201	25.8998	25.6749			0.425963	0.821102	Q14683;G8JLG1;H0Y7K8;V9GY57;V9GYN9	Structural maintenance of chromosomes protein 1A;Structural maintenance of chromosomes protein	SMC1A
26.0551	26.1728	26.0306	26.3248	26.5559	26.5355			1.96274	0.3859	Q8TCT9;A0A075B6F6;A0A0C4DGU3	Minor histocompatibility antigen H13	HM13
25.142	25.1728	24.8654	24.5651	24.8916	25.0287			0.616662	-0.2316	J3QT77;A0A0J9YYG4;A0A0J9YXF2;Q15165;G3XAK4;A0A0J9YXM1;A0A0J9YXU7	Serum paraoxonase/arylesterase 2	PON2
26.5378	26.538	26.3711	26.6487	26.4232	26.2047			0.151611	-0.0567659	P30048	Thioredoxin-dependent peroxide reductase, mitochondrial	PRDX3
26.1497	26.1726	25.888	26.2875	26.2139	26.4713			1.00067	0.254133	Q8NCW5;Q5T3I4;Q5T3I3	NAD(P)H-hydrate epimerase	APOA1BP
25.4006	25.7447	25.8446	25.3219	25.1704	24.5203			1.10594	-0.6591	Q9UQ35;I3L182;I3L4D8;I3L1I8;A0A087X1W1;I3L1C0;I3L3Q8	Serine/arginine repetitive matrix protein 2	SRRM2
25.0636	25.7403	25.807	25.497	25.7118	25.4365			0.0150904	0.011467	B0QYK0;Q01844;A0A0D9SFL3;C9JGE3;H7BY36;F8WC90	RNA-binding protein EWS	EWSR1
23.3077	23.1177	22.5069	23.7452	24.1017	24.1061			1.69463	1.00687	A0A087X054;Q9Y4L1;E9PJ21;A0A087WWI4;K7EQK2;A0A087X214;A0A087WW13;Q9BST8;J3QQH7;J3QLE9;J3QL06;J3KTF1	Hypoxia up-regulated protein 1	HYOU1
23.7611	23.8683	24.0129	23.6232	23.7039	23.8593			0.687287	-0.151967	A0A087WY00;G3V394;F8WE88;F8W6H6;Q9Y4I1;E7ERV5;Q9UES5;O95317	Unconventional myosin-Va	MYO5A
25.6186	25.2229	25.1093	25.4824	25.5464	24.8974			0.0104837	-0.00820033	D3DQV9;P78344;H0Y3P2;H0YCH5;H0YD77;H0YEC5;E9PKF8;H0YCF8;H0YE22;H0YD99;H0YE44;H0YEN8;H0YDC0	Eukaryotic translation initiation factor 4 gamma 2	EIF4G2
24.8992	22.4905	24.752	24.8299	24.6282	24.5281			0.321443	0.614821	P00491;G3V5M2;G3V2H3	Purine nucleoside phosphorylase	PNP
25.1933	25.5055	25.2703	25.804	25.5271	25.6653			1.30121	0.342433	A0A0C4DFM1;Q92544;F8WCN2;F2Z2L1	Transmembrane 9 superfamily member 4	TM9SF4
23.2344	22.7899	21.8007	22.8408	23.235	23.2148			0.479255	0.488537	G3V1L9;Q07157;A0A087X0K9;G5E9E7;H0YKB1;H0Y3R8;H0YLT6	Tight junction protein ZO-1	TJP1
25.6798	25.5275	25.4684	25.6596	25.7909	25.7982			1.16016	0.191	Q8WUM0	Nuclear pore complex protein Nup133	NUP133
24.5252	25.0096	24.9876	25.0413	25.1415	23.204			0.228274	-0.378527	O96008;K7EJ57;K7EKG4	Mitochondrial import receptor subunit TOM40 homolog	TOMM40
26.1862	26.2424	26.492	23.6288	26.9557	26.5753			0.21624	-0.586943	Q15758;M0QXM4;M0QX44;M0R144	Neutral amino acid transporter B(0);Amino acid transporter	SLC1A5
22.2075	26.4784	26.1391	26.2511	25.9297	26.0498			0.341933	1.13519	O94776	Metastasis-associated protein MTA2	MTA2
24.2785	24.3335	24.5947	24.2982	24.673	24.5772			0.312685	0.113901	Q13148;A0A087WX29;B1AKP7;G3V162;A0A087X260;A0A087WYY0;K7EN94;A0A087WW61;A0A087WX67;A0A087WXV3;A0A087WXQ5;K7EJM5;A0A087WV68;A0A087WZC9;A0A087WTZ4;K7EL26;A0A087WZM1;K7EJ99;A0A0A0MSV7;A0A087WYE7	TAR DNA-binding protein 43	TARDBP
25.2969	26.1374	26.0071	25.3091	25.9645	25.8398			0.121074	-0.109333	P43490;A0A0C4DFS8	Nicotinamide phosphoribosyltransferase	NAMPT
25.444	25.5469	25.4823	25.7992	25.9936	25.749			1.94228	0.356201	E9PLD0;Q9H0U4;P62820;A0A087WTI1;E7END7;Q92928;H0YLJ8;H0YL94;H0YMN7;P51153;P59190	Ras-related protein Rab-1B;Ras-related protein Rab-1A;Putative Ras-related protein Rab-1C	RAB1B;RAB1A;RAB1C
22.9659	23.1714	22.3906	25.8379	25.028	22.9038			0.900047	1.74729	Q03518	Antigen peptide transporter 1	TAP1
25.8374	24.9926	25.5912	24.6785	25.3281	25.5926			0.301244	-0.274	P52907	F-actin-capping protein subunit alpha-1	CAPZA1
25.0189	24.4549	23.333	24.5892	24.6839	24.7527			0.337125	0.406334	A0A087WYS1;E7EUC7;Q16851;C9JWG0;C9JVG3;C9JQU9;C9JNZ1;C9JTZ5;C9JUW1	UTP--glucose-1-phosphate uridylyltransferase	UGP2
25.0692	25.016	25.4541	25.2525	21.179	25.0063			0.442791	-1.36716	P17252;J3KRN5;P05129;M0R0I9	Protein kinase C alpha type	PRKCA
22.3842	22.3347	23.6993	23.4368	23.9589	23.7264			0.890703	0.901304	P04150;D6RDA9;Q3MSN4	Glucocorticoid receptor	NR3C1
24.5254	25.1057	24.0014	24.8821	24.8911	25.0682			0.549278	0.402971	O43172	U4/U6 small nuclear ribonucleoprotein Prp4	PRPF4
22.8022	23.3925	21.9282	22.7949	23.4654	22.9802			0.325747	0.372538	Q6PGP7;D6RCE2;H0Y964	Tetratricopeptide repeat protein 37	TTC37
24.231	23.6634	23.6681	24.0595	22.5982	23.6424			0.372078	-0.420795	D6R938;E9PBG7;E9PF82;Q13557;H0Y9J2;H0Y9C2;H0Y6G2;H7BXS4;Q8WU40;Q9UQM7;Q13554	Calcium/calmodulin-dependent protein kinase type II subunit delta	CAMK2D
23.5242	23.5912	21.6087	23.5701	23.7323	23.4898			0.454429	0.689373	R4GNB2;R4GN35;Q5VZ89;R4GMN2;X6R5W5;X6RAE7	DENN domain-containing protein 4C	DENND4C
24.2501	24.3338	23.7225	24.0669	23.9257	23.8731			0.298268	-0.1469	Q12888;A6NNK5;H7BZY0;C9JXV0;H7C3N7	Tumor suppressor p53-binding protein 1	TP53BP1
23.0032	22.4655	22.9315	23.7653	23.756	23.7274			2.30744	0.94949	E9PKH2;P50454;E9PR70;E9PPV6	Serpin H1	SERPINH1
24.3006	24.3442	23.8421	23.9817	24.1625	24.534			0.100151	0.0637627	Q7Z3U7;F8VZV1	Protein MON2 homolog	MON2
23.565	22.2486	22.9168	24.8995	24.3652	24.5634			1.84117	1.69927	D6RCD0;Q8NBQ5	Estradiol 17-beta-dehydrogenase 11	HSD17B11
24.0637	24.1434	23.738	24.1505	23.647	23.8065			0.230328	-0.113701	Q9HCU5;B5MC98;H7C2N7;H7C0W3	Prolactin regulatory element-binding protein	PREB
26.0367	25.8726	25.9083	25.9863	22.5749	26.078			0.38674	-1.05947	P19623;K7ESL0;K7EL89;K7EKM4;K7EQ47	Spermidine synthase	SRM
24.2038	24.5146	24.131	24.0904	24.1288	24.2017			0.512969	-0.142834	Q86SW4;P36957;H0YJF9;G3V5M3;G3V3F0	Dihydrolipoyllysine-residue succinyltransferase component of 2-oxoglutarate dehydrogenase complex, mitochondrial	DLST
24.5428	23.4004	23.2137	24.0278	23.2666	23.0754			0.199146	-0.26238	A0A096LPI6;A0A096LNH5;A0A0B4J2H4;H7C1F6;A0A0B4J2D5;P30042;H7C2G3;A0A096LNJ1;A0A096LP73;F2Z2Q0;A0A096LP12	ES1 protein homolog, mitochondrial	C21orf33
25.0065	25.2203	25.0706	25.1823	25.1649	25.1898			0.554904	0.0798664	F5GXX5;P61803;F5H895;A0A0B4J239	Dolichyl-diphosphooligosaccharide--protein glycosyltransferase subunit DAD1	DAD1
25.1674	25.1793	25.714	24.9488	24.8883	24.8485			1.18023	-0.458368	P11177;C9J634;F8WF02	Pyruvate dehydrogenase E1 component subunit beta, mitochondrial	PDHB
23.3132	23.2753	23.1563	25.0034	24.3785	24.3803			2.48323	1.33914	Q9Y394;A0A087X0Z7;H0YJ66;H0YJE4;H0YJR8;G3V5J0	Dehydrogenase/reductase SDR family member 7	DHRS7
23.198	23.5635	23.5427	24.3811	23.7084	24.5009			1.30481	0.762075	F8W726;Q14157;Q5VU81;Q5VU80;Q5VU79;Q5VU78;Q5VU77;H0Y5H6;H7C2T8	Ubiquitin-associated protein 2-like	UBAP2L
23.0706	23.4045	23.6806	24.4676	24.3	23.8713			1.52691	0.827738	P50502;H7C3I1;A0A087X1H6;Q3KNR6;Q8IZP2;Q8NFI4;F6VDH7;F8WAQ7	Hsc70-interacting protein;Putative protein FAM10A4;Putative protein FAM10A5	ST13;ST13P4;ST13P5
23.0449	23.3411	23.3011	23.2091	23.1399	23.3701			0.0311758	0.0106544	P34896	Serine hydroxymethyltransferase, cytosolic	SHMT1
23.0181	23.8082	23.8246	24.0315	24.4484	23.7096			0.683052	0.512869	E9PHI4;O94901;H0Y742;H0Y6N5;H7C2K3;C9JK55;C9JR15;C9JS54;C9JJU6;C9K051;H7C3X3;H7C019	SUN domain-containing protein 1	SUN1
23.1853	25.0065	25.2215	25.5595	25.3436	25.2698			0.636482	0.91987	E7EU96;Q5U5J2;P68400;Q8NEV1;A0A087WY74;V9GYA2;V9GY80	Casein kinase II subunit alpha;Casein kinase II subunit alpha 3	CSNK2A1;CSNK2A3
25.1828	25.6287	25.3454	25.5829	25.7742	25.6818			0.973433	0.294	D3YTB1;F8W727;P62910;D3YTI8	60S ribosomal protein L32	RPL32
24.1603	24.1204	24.1708	23.8471	24.0275	23.9895			1.57788	-0.1958	G5EA36;P30260;I3L328;I3L394;F6QPS0;I3L2Z8;I3L3H6	Cell division cycle protein 27 homolog	CDC27
26.6753	26.8004	27.0881	26.9864	26.8379	26.0705			0.292071	-0.223	P26373;J3QSB4;H3BTH3	60S ribosomal protein L13	RPL13
24.8354	24.7465	24.5404	25.0639	25.0117	24.7897			0.95624	0.247667	P31942	Heterogeneous nuclear ribonucleoprotein H3	HNRNPH3
25.6328	26.3825	25.4676	25.4048	25.8536	25.9299			0.108993	-0.0981998	Q92769;E5RFI6;E5RJ04;E5RGV4;E5RHE7;E5RH52;E5RG37;E5RFP9;H3BM24;E5RK19	Histone deacetylase 2	HDAC2
23.4089	25.4564	25.4208	24.4267	25.2375	24.7002			0.012019	0.0261141	O15294;C9JZL3	UDP-N-acetylglucosamine--peptide N-acetylglucosaminyltransferase 110 kDa subunit	OGT
23.5773	24.0714	24.2122	23.8263	24.112	24.3605			0.232148	0.145967	Q8IWB1;X6RK76	Inositol 1,4,5-trisphosphate receptor-interacting protein	ITPRIP
26.1217	26.3519	25.9112	26.5399	27.1755	26.9075			1.53675	0.746033	A8MT02;P14678;J3QLE5;P63162;J3KRY3;S4R3P3	Small nuclear ribonucleoprotein-associated proteins B and B;Small nuclear ribonucleoprotein-associated protein N	SNRPB;SNRPN
25.0932	25.6212	25.4344	24.9629	25.7278	25.8616			0.1576	0.1345	Q14739;C9JXK0;C9JES9	Lamin-B receptor	LBR
25.4379	24.8923	24.8754	24.5988	25.3818	24.7558			0.199215	-0.1564	P50579;F8VRR3;G3V1U3;F8VSC4;F8VZX9;F8VY03	Methionine aminopeptidase 2	METAP2
25.4237	25.7115	25.1152	22.5835	24.9147	25.0904			0.670422	-1.22062	F5GWX5;A0A0C4DGG9;Q14839;Q8TDI0;K7EMY3;F5H6N4;F2Z2R5;K7EPV1;I3L229;H7C3H7;H7C0J3	Chromodomain-helicase-DNA-binding protein 4	CHD4
22.2966	23.8274	24.0057	24.2373	24.2886	24.3402			0.773557	0.912153	A0A087WUC6;E9PI68;Q15005;E9PRB9;E9PL01;H0YE04	Signal peptidase complex subunit 2	SPCS2
23.1018	22.8974	22.8465	23.9311	23.978	24.0378			3.60326	1.03377	Q07973	1,25-dihydroxyvitamin D(3) 24-hydroxylase, mitochondrial	CYP24A1
22.9024	23.6225	23.6484	24.2025	24.0212	23.9999			1.26856	0.683445	O00629;H7C4F6	Importin subunit alpha-3	KPNA4
22.0745	23.0796	23.835	24.1151	24.6478	24.2691			1.18664	1.34766	Q9UKV8	Protein argonaute-2	AGO2
24.6044	23.5705	23.144	25.2635	25.178	25.3948			1.57894	1.5058	P08574	Cytochrome c1, heme protein, mitochondrial	CYC1
23.572	23.1783	23.8243	23.5426	23.9023	23.7261			0.390379	0.19879	Q6NUM9;H7BZ81;H7C3J0;H0YGU3;H7BZ16	All-trans-retinol 13,14-reductase	RETSAT
24.155	23.9881	22.891	23.9363	24.4359	24.1631			0.521032	0.500408	A0A0A0MTN9;A0A0A0MTR6;A0A0C4DFN8;A0A0A0MSZ4;A0A0A0MT64;P22570;J3QQX3;A0A0C4DGN7;J3QKZ8;J3QQW7	NADPH:adrenodoxin oxidoreductase, mitochondrial	FDXR
24.3671	24.3276	23.8341	24.2225	24.0231	24.6448			0.183022	0.120542	G3V4F7;P61011	Signal recognition particle 54 kDa protein	SRP54
25.0791	24.5034	23.0231	25.8635	24.9478	25.1622			0.769352	1.12265	O43175;Q5SZU1	D-3-phosphoglycerate dehydrogenase	PHGDH
23.3093	24.8905	23.2213	24.4199	24.914	24.4816			0.638151	0.798128	Q08945;E9PMD4;A0A0U1RRK2;E9PPZ7	FACT complex subunit SSRP1	SSRP1
23.8213	23.3077	23.2507	24.1611	24.4511	24.627			1.86532	0.953203	B4DXZ6;P51114;E9PFF5;E7EU85;C9JAJ4	Fragile X mental retardation syndrome-related protein 1	FXR1
25.0265	25.256	23.3161	25.3059	25.4658	24.4149			0.311555	0.529324	A0A087X2E5;A0A087WZN1;O43837	Isocitrate dehydrogenase [NAD] subunit, mitochondrial;Isocitrate dehydrogenase [NAD] subunit beta, mitochondrial	IDH3B
23.4887	23.5469	23.7532	23.7439	23.5686	23.5343			0.0652328	0.0193329	A0A087X1A5;Q5JW30;O95793;Q5JW28;F6UDC6	Double-stranded RNA-binding protein Staufen homolog 1	STAU1
23.6973	23.9134	24.0676	23.7291	23.6451	23.5554			0.987154	-0.249567	A0A0A6YYC3;A0A0A6YYJ8;Q9Y383	Putative RNA-binding protein Luc7-like 2	C7orf55-LUC7L2;LUC7L2
23.692	23.4389	23.6092	23.8272	23.8746	24.0786			1.49674	0.346766	A0A0G2JIC6;Q9Y676	28S ribosomal protein S18b, mitochondrial	MRPS18B
26.1494	26.7327	26.3421	26.4806	26.4673	26.7406			0.329625	0.154767	H0YKD8;P46779;H0YLP6;H0YMF4	60S ribosomal protein L28	RPL28
24.8449	25.6636	25.593	25.0411	25.2539	25.3196			0.231433	-0.162301	J3QRS9;X6R4W8;O43670;J3KS31;J3QS27;J3KTL1;J3KRB6;J3KRW6;H0Y3M2	BUB3-interacting and GLEBS motif-containing protein ZNF207	ZNF207
26.0118	26.3558	26.1569	26.2374	26.9903	26.8542			0.96403	0.519133	P84077;P61204;F5H423;H0YGG7	ADP-ribosylation factor 1;ADP-ribosylation factor 3	ARF1;ARF3
25.8199	26.0033	26.2218	25.9795	26.2782	26.6171			0.56406	0.2766	P62081;B5MCP9	40S ribosomal protein S7	RPS7
23.6881	23.8245	23.9018	23.9198	23.6574	23.789			0.0565293	-0.0160669	P84095	Rho-related GTP-binding protein RhoG	RHOG
29.2446	29.6583	29.718	29.3232	29.9079	29.8528			0.257362	0.154333	Q5TEC6;K7EMV3;K7EP01;B4DEB1;K7EK07;K7ES00;Q6NXT2;Q71DI3;Q16695;P84243;P68431	Histone H3;Histone H3.3C;Histone H3.2;Histone H3.1t;Histone H3.3;Histone H3.1	HIST2H3PS2;H3F3B;H3F3A;H3F3C;HIST2H3A;HIST3H3;HIST1H3A
24.8795	25.3112	25.355	25.2504	25.3307	25.4348			0.414527	0.156734	Q8NC51	Plasminogen activator inhibitor 1 RNA-binding protein	SERBP1
24.4509	24.3843	24.1496	24.6796	24.928	24.6296			1.48889	0.417467	Q99714;Q5H928	3-hydroxyacyl-CoA dehydrogenase type-2	HSD17B10
24.9624	24.6492	24.6763	25.2061	24.9524	25.4231			1.19979	0.431233	Q9H9B4;D6RFI0;D6RDG7;S4R2X2;D6RAE9	Sideroflexin-1	SFXN1
23.0181	24.8736	22.4621	24.8018	25.4142	24.8591			0.977123	1.57375	Q9HB71;B2ZWH1	Calcyclin-binding protein	CACYBP
25.8204	25.9947	25.9924	26.1818	26.1373	25.8983			0.578292	0.136634	O14684	Prostaglandin E synthase	PTGES
24.8697	25.0802	24.8546	24.9497	24.6928	25.0892			0.061457	-0.0242672	P53597;H7C233	Succinyl-CoA ligase [ADP/GDP-forming] subunit alpha, mitochondrial	SUCLG1
25.1679	24.6506	24.5141	25.0903	24.2721	24.4306			0.2189	-0.179867	P48163	NADP-dependent malic enzyme	ME1
23.88	24.4299	24.7525	24.7251	24.3049	24.3958			0.15953	0.121133	Q9HAV4;H0Y3W3;E2QRM3;H0Y9I3;H0Y3Q8	Exportin-5	XPO5
24.8823	24.9092	24.9315	25.4698	25.2707	25.2674			2.47865	0.428301	P04792;F8WE04;C9J3N8	Heat shock protein beta-1	HSPB1
25.0227	24.7239	24.9083	24.8222	24.2877	24.7299			0.659754	-0.271699	P31150;G5E9U5	Rab GDP dissociation inhibitor alpha	GDI1
25.2731	24.806	25.3419	25.1637	24.5261	24.6039			0.648028	-0.375766	P52788;H7C2R7	Spermine synthase	SMS
23.9701	24.4189	24.6164	24.1752	24.6628	24.2685			0.0475627	0.0336997	Q9BQL6;G3V1L6	Fermitin family homolog 1	FERMT1
25.2942	25.4664	25.3608	25.5325	25.8683	25.8831			1.44129	0.387499	D6RD47;P62266;D6RDJ2;D6RIX0;D6R9I7	40S ribosomal protein S23	RPS23
25.593	25.8364	25.6002	25.672	25.3599	25.5634			0.523885	-0.144766	E7EPT4;P19404	NADH dehydrogenase [ubiquinone] flavoprotein 2, mitochondrial	NDUFV2
24.2104	23.7684	23.8394	24.4871	24.1944	24.3216			1.15278	0.394967	F8WCF6;P59998;R4GN08;F8WDD7;A0A0A6YYG9;H7C0A3	Actin-related protein 2/3 complex subunit 4	ARPC4-TTLL3;ARPC4
26.6991	27.2314	27.3064	26.7412	27.2349	27.1513			0.0513006	-0.0365003	I3L3P7;P62244;H3BVC7	40S ribosomal protein S15a	RPS15A
24.6542	24.6092	24.4832	24.7607	25.0693	24.6283			0.779497	0.237233	O75844	CAAX prenyl protease 1 homolog	ZMPSTE24
27.2815	26.98	27.1329	27.5593	27.4188	27.4338			1.59159	0.339167	P10620;F5H7F6;F5H6X2;F5H760	Microsomal glutathione S-transferase 1	MGST1
24.7593	24.7752	24.3637	24.8675	24.202	24.3415			0.266864	-0.162401	P35241	Radixin	RDX
26.143	25.5064	25.8905	25.9558	25.7239	25.8638			0.0019895	0.00120036	P49721;A0A087WVV1	Proteasome subunit beta type-2	PSMB2
25.3814	25.1642	25.1879	25.5853	25.2605	25.1209			0.193913	0.0777334	Q969X5;F2Z3Q5;F2Z2U2	Endoplasmic reticulum-Golgi intermediate compartment protein 1	ERGIC1
27.8438	28.2443	28.1287	28.0473	28.3022	28.3107			0.429702	0.1478	A0A087WXM6;J3QQT2;J3KRX5;A0A0A6YYL6;P18621;J3QLC8;A0A0A0MRF8;J3KRB3;A0A087WWH0;J3QS96;A0A087WY81;J3KSJ0	60S ribosomal protein L17	RPL17;RPL17-C18orf32
25.4882	25.4469	25.5318	25.1166	25.0281	25.2525			2.1605	-0.356566	P55795	Heterogeneous nuclear ribonucleoprotein H2	HNRNPH2
25.6727	25.9163	25.65	25.7736	25.7555	26.0313			0.362633	0.107133	P56537;B7ZBH1;A0A0U1RQV5;F8WD20;A0A0B4J1Y7;F8WDS6	Eukaryotic translation initiation factor 6	EIF6
24.3649	24.5098	24.1278	24.8587	25.1643	24.6824			1.46728	0.567633	P07741;H3BQF1;H3BQZ9;H3BQB1;H3BSW3	Adenine phosphoribosyltransferase	APRT
24.6582	25.6563	25.5782	25.3133	25.2997	25.3427			0.0218482	0.0209999	O43396;K7ER96;K7EML9;K7EKG2;K7EPB7	Thioredoxin-like protein 1	TXNL1
25.7458	25.8901	25.5337	25.5941	25.5375	25.5485			0.710048	-0.163167	Q13867;J3KSD8;K7ES02;K7ESE8;J3KS79;K7ENH5	Bleomycin hydrolase	BLMH
25.4826	26.0631	26.1364	25.507	25.7824	25.6229			0.506593	-0.2566	Q14126;J3KSI6	Desmoglein-2	DSG2
26.2183	26.1007	26.3658	26.6245	26.6871	26.5033			1.79866	0.376699	A0A0A6YYL2;P0DMN0;P0DMM9;H3BPL6;H3BRT0;H3BNY7	Sulfotransferase;Sulfotransferase 1A4;Sulfotransferase 1A3	SULT1A4;SULT1A3
27.3175	27.8009	27.5714	27.4708	28.0017	27.9472			0.483216	0.243301	E7EPB3;P50914	60S ribosomal protein L14	RPL14
25.1895	25.3648	26.3452	25.4053	25.4132	24.1508			0.510117	-0.6434	O95602;B9ZVN9	DNA-directed RNA polymerase I subunit RPA1;DNA-directed RNA polymerase	POLR1A
25.6318	25.0906	25.8382	25.0647	25.081	24.9683			1.0024	-0.4822	Q15021;E7EN77;F5GZK7	Condensin complex subunit 1	NCAPD2
24.7184	25.2803	23.2129	25.1215	25.2081	24.9707			0.48808	0.696236	F2Z2Y4;O00764	Pyridoxal kinase	PDXK
24.2888	24.3227	24.4194	24.3739	24.2936	23.9121			0.436399	-0.150433	Q15477;H7C5N0;F8WDE8;H7C4L3;B4E0B4	Helicase SKI2W	SKIV2L
23.8903	24.5805	24.2408	23.9423	24.7164	23.8661			0.064317	-0.0622667	A0A087X1N2;Q03701	CCAAT/enhancer-binding protein zeta	CEBPZ
25.4099	25.3932	24.9944	25.5137	25.0688	25.1663			0.0284843	-0.0162334	Q8TD19;G3V459	Serine/threonine-protein kinase Nek9	NEK9
26.8401	27.0206	26.9484	26.9016	27.0361	27.0319			0.31986	0.0535005	H0YMV8;Q71UM5;C9JLI6	40S ribosomal protein S27;40S ribosomal protein S27-like	RPS27L
25.3269	25.1138	24.977	25.9116	25.5471	25.1303			0.721322	0.390434	Q9UJ72;A0A087X0X1	Annexin A10	ANXA10
25.2309	25.6577	25.5678	25.6335	25.8764	25.5297			0.514852	0.1944	P60891;B1ALA7;B7ZB02	Ribose-phosphate pyrophosphokinase 1	PRPS1
25.7716	25.5213	25.5042	26.0226	25.6235	25.4024			0.15605	0.0838	P30086	Phosphatidylethanolamine-binding protein 1;Hippocampal cholinergic neurostimulating peptide	PEBP1
23.3721	23.9792	22.5937	25.1318	25.0276	24.6115			1.6924	1.60867	B5MCF9;O00541;B3KXD6;H7C267	Pescadillo homolog	PES1
24.7828	24.5709	24.654	23.9734	24.7962	24.9278			0.124065	-0.103434	Q9NTI5;A9IYQ1	Sister chromatid cohesion protein PDS5 homolog B	PDS5B
24.2789	24.9836	23.1458	24.8515	24.4007	24.6919			0.391806	0.511944	Q9BT22;K7EID2;K7EPU3;K7EQK1;A0A087WZJ8;Q6GMV1	Chitobiosyldiphosphodolichol beta-mannosyltransferase	ALG1
23.904	24.6214	24.4445	24.7707	24.504	24.6217			0.603731	0.308836	P11166	Solute carrier family 2, facilitated glucose transporter member 1	SLC2A1
24.4517	24.6574	24.4746	24.8997	24.7934	24.9372			1.9557	0.348867	H0YD13;H0Y2P0;P16070;H0YE40;H0YDX6;H0YD17;H0YDW7;H0YCV9;H0Y5E4;E9PKC6;J3KN83	CD44 antigen	CD44
24.8682	24.7331	24.7682	24.6045	25.6192	25.182			0.510093	0.345399	Q2PZI1;H7C3M5;H7C1I8	Probable C-mannosyltransferase DPY19L1	DPY19L1
27.007	27.5385	27.5234	27.1165	27.5133	27.568			0.0664928	0.0429675	E9PLL6;P46776;E9PJD9;E9PLX7	60S ribosomal protein L27a	RPL27A
26.038	26.2987	26.2043	26.2424	26.447	26.4018			0.868292	0.1834	O75131;A0A087WYQ3;H0YB26;E7ENV7;Q96FN4;Q8IYJ1;Q96A23;O95741;Q86YQ8;Q9HCH3;Q9UBL6	Copine-3	CPNE3
25.1514	23.648	25.0353	25.3604	25.0418	25.6364			0.647629	0.734637	P50851	Lipopolysaccharide-responsive and beige-like anchor protein	LRBA
24.3493	24.0704	24.4489	24.3573	24.2272	24.4039			0.116123	0.0399329	Q7Z2Z2	Elongation factor Tu GTP-binding domain-containing protein 1	EFTUD1
23.2783	23.4927	22.985	23.4135	23.7031	23.3617			0.593042	0.240798	Q9H2G2	STE20-like serine/threonine-protein kinase	SLK
23.2568	23.6154	23.83	24.8242	25.4426	24.8986			2.35514	1.48775	H3BVG0;Q8N1F7;H3BPA9;H3BMX0;H3BRI8;H3BP95;H3BM93;H3BNN5;H3BV11;H3BNG7;H3BVE2;H3BRD9	Nuclear pore complex protein Nup93	NUP93
24.6607	24.5912	24.393	24.1825	24.0157	24.551			0.775971	-0.298566	O00139;H0Y8H2	Kinesin-like protein KIF2A	KIF2A
24.6166	25.1761	25.164	24.542	25.2447	25.4205			0.0913529	0.0834999	O95864	Fatty acid desaturase 2	FADS2
24.816	25.3298	25.1279	24.9066	25.1598	25.2933			0.0525923	0.0286674	O00148;K7EQN7;K7EPJ3;K7EN69;K7ENP6;K7EL56;K7EIL8;A0A0D9SEM9	ATP-dependent RNA helicase DDX39A	DDX39A
24.4238	24.952	24.539	24.6047	24.7135	24.749			0.11069	0.0508003	Q9Y3F4;H0YH33	Serine-threonine kinase receptor-associated protein	STRAP
25.5357	24.8862	24.6051	25.26	25.2696	24.9251			0.182258	0.142567	O95336;M0R1L2;M0R261;M0R0U3	6-phosphogluconolactonase	PGLS
25.95	25.8569	26.0348	26.3041	26.1241	25.3457			0.0253537	-0.0226002	E9PM69;R4GNH3;P17980;E9PKD5;E9PMD8;E9PN50;E9PLG2	26S protease regulatory subunit 6A	PSMC3
25.6733	25.8408	25.7932	25.5846	26.2411	26.0319			0.386359	0.183434	Q5VV89;O14880;Q5VV87	Microsomal glutathione S-transferase 3	MGST3
24.3008	23.1314	22.6072	24.9046	24.5776	24.8496			1.31222	1.43079	O00151	PDZ and LIM domain protein 1	PDLIM1
24.6923	24.5833	23.4314	24.9961	24.382	24.7022			0.446701	0.457755	P22695;H3BRG4;H3BSJ9;H3BP04;H3BUE4;H3BUI9;A0A087WVZ4	Cytochrome b-c1 complex subunit 2, mitochondrial	UQCRC2
24.3222	24.3208	24.3359	24.3242	24.3639	24.5079			0.575167	0.0723661	Q9H2U2;D6R967;H0Y9D8;D6RGV9;A0A0C4DGB9;H0YAK2;D6RAD3	Inorganic pyrophosphatase 2, mitochondrial	PPA2
25.094	25.9257	24.8612	24.6917	25.5146	25.1448			0.165835	-0.1766	O75165;H0Y8Q2;H0YA63	DnaJ homolog subfamily C member 13	DNAJC13
24.4923	24.8916	25.0136	24.7666	24.5805	24.7643			0.219809	-0.0953668	O94906	Pre-mRNA-processing factor 6	PRPF6
26.5473	26.7837	26.4462	26.7922	26.897	26.7934			1.04333	0.235133	K7ENG2;P26368	Splicing factor U2AF 65 kDa subunit	U2AF2
26.4785	26.1431	26.2284	26.0527	26.3747	26.342			0.0651904	-0.0268669	P28066	Proteasome subunit alpha type-5	PSMA5
24.7607	24.7196	25.0442	24.8915	24.9022	24.9175			0.239662	0.062233	Q5SRQ6;P67870;Q5SRQ3;N0E472;A0A0G2JM12;N0E644;A0A0G2JM58	Casein kinase II subunit beta	CSNK2B;CSNK2B-LY6G5B-1181;CSNK2B-LY6G5B--991
25.1826	24.9628	24.8795	25.3312	22.371	24.4558			0.468723	-0.95563	Q6WCQ1;J3KSW8;H0Y2S9;H0Y7E2;J3KSK7;J3QRL2;H7C3G6	Myosin phosphatase Rho-interacting protein	MPRIP
25.7411	25.7472	25.5789	25.9272	26.2395	26.6587			1.25627	0.586067	B1APM4;P35610	Sterol O-acyltransferase 1	SOAT1
24.8427	25.2232	24.7236	25.2296	25.8629	24.4197			0.21025	0.240901	P52888;K7EP46;K7EL02;K7EIK4;K7EL32;K7EKB6;K7EMU4	Thimet oligopeptidase	THOP1
24.5111	24.4225	24.4912	24.315	24.4573	24.5548			0.164282	-0.0325667	P19525;C9JZT2;F8WBH4	Interferon-induced, double-stranded RNA-activated protein kinase	EIF2AK2
25.6077	23.1507	25.4892	24.782	25.6888	25.5138			0.274333	0.578986	Q12931;I3L0K7;I3L239;I3L253	Heat shock protein 75 kDa, mitochondrial	TRAP1
24.5922	24.974	24.9296	24.6064	25.072	24.9669			0.0961024	0.0498333	Q5GLZ8;D6RCL5;H0Y6K7	Probable E3 ubiquitin-protein ligase HERC4	HERC4
23.7471	23.2072	23.1734	24.5053	24.5592	24.7006			2.4696	1.21244	A0A024RCR6;A0A0G2JK23;P46379;A0A0G2JL47;F6S6P2;X6REW1;A0A0G2JJM1;F6TC96;F6UR09;F6U1F2;F6XTU0;H0Y710;A0A0G2JJR8;F6WML8;F6VEM6;F6X9W3;F6U341;H0Y4L1	Large proline-rich protein BAG6	BAT3;BAG6
24.9855	24.8941	25.373	24.9655	24.9223	24.9627			0.382193	-0.134033	Q10570;A0A087X101;E9PIM1;A0A087WTV4	Cleavage and polyadenylation specificity factor subunit 1	CPSF1
24.1984	23.7824	23.7238	24.0115	23.8791	24.13			0.251576	0.105333	Q13409;E7EQL5;E7EQU2;E7ESD3;E7EMU4;E7EV09;E9PGG1;E7EUM4;E7ERR6;E7ERH4;E7ET01;E7ETL8;E7EU01	Cytoplasmic dynein 1 intermediate chain 2	DYNC1I2
24.0863	23.9334	24.1865	24.0989	24.1819	24.4304			0.609749	0.168334	Q9P2R7;Q5T9Q5;A0A0U1RQL1;A0A0U1RRI1;Q5T9Q8;A0A0U1RQU7;A0A0U1RQF8	Succinyl-CoA ligase [ADP-forming] subunit beta, mitochondrial	SUCLA2
24.8115	23.7941	24.9828	24.8174	25.5182	24.9358			0.582328	0.561	Q9H2U1;E7EWK3;H7C5F5;H7C514;A0A0G2JRP3;A0A0G2JQU7	ATP-dependent RNA helicase DHX36	DHX36
25.3018	22.5928	25.6556	25.3932	25.4587	25.4787			0.406227	0.926785	Q99567;J3KMX1;I3L4K7;I3L245;I3L2W3	Nuclear pore complex protein Nup88	NUP88
25.1677	25.6152	25.5506	24.7879	25.6903	25.3421			0.224645	-0.171066	P16401	Histone H1.5	HIST1H1B
24.1333	24.4203	24.2668	24.0912	24.6887	24.266			0.142322	0.0751667	P29317	Ephrin type-A receptor 2	EPHA2
26.5629	26.2369	26.3892	26.5859	26.7752	26.6288			1.13888	0.266966	P60981;F6RFD5	Destrin	DSTN
25.7451	25.9234	25.8693	25.6919	26.1133	25.1382			0.27715	-0.198133	B4DR61;P61619;H7C1Q9;C9JXC6;H7C069;A6NK38;F2Z2C7;A6NIF9;F8W776;Q8TC24;Q9H9S3	Protein transport protein Sec61 subunit alpha isoform 1	SEC61A1
24.5558	24.9188	25.0393	24.65	24.6669	24.7478			0.431693	-0.149733	P63151;E5RFR9;Q66LE6;E5RIY1;Q00005;Q9Y2T4	Serine/threonine-protein phosphatase 2A 55 kDa regulatory subunit B alpha isoform	PPP2R2A
25.6773	25.8183	25.3867	26.2704	25.8279	25.958			1.00484	0.391333	P30084	Enoyl-CoA hydratase, mitochondrial	ECHS1
24.6954	24.6808	24.6543	24.5305	25.2568	24.7142			0.290805	0.157	E5RI99;P62888;A0A0B4J213;E5RJH3;A0A0C4DH44	60S ribosomal protein L30	RPL30
25.7938	25.3497	25.7295	25.6154	25.8015	25.5938			0.108046	0.0458997	C9J9K3;A0A0C4DG17;P08865;F8WD59	40S ribosomal protein SA	RPSA
24.5607	25.3153	24.6207	24.1351	24.3262	24.6272			0.768133	-0.4694	Q9BZH6;S4R3Z0	WD repeat-containing protein 11	WDR11
25.4094	25.3806	25.2972	25.5248	25.2967	25.3106			0.0641816	0.0149663	P43034;I3L3N5;I3L495	Platelet-activating factor acetylhydrolase IB subunit alpha	PAFAH1B1
26.648	26.6913	26.4595	26.5134	26.9858	26.8319			0.495461	0.177433	Q15366;H3BRU6;F8W0G4;F8VXH9;F8W1G6;H3BND9;J3QT27;E9PFP8;P57721;H3BSS4;F8VTZ0;H3BSP4;C9K0A2;F8WC71;C9IZV9;C9J7A9;C9JSA6;C9J5V4;C9JTY5;C9JZY3;C9J0A4;F6TJN8;P57723	Poly(rC)-binding protein 2	PCBP2
25.6194	25.478	25.5637	25.6103	25.7136	25.3968			0.0680413	0.0198663	O14818;H0Y586;A0A087WYS6;Q8TAA3	Proteasome subunit alpha type-7	PSMA7
25.936	25.7518	25.8812	26.2748	25.906	25.8981			0.554808	0.169966	J3KQI6;Q9BX79;I3L2B6;I3NI08	Stimulated by retinoic acid gene 6 protein homolog	STRA6
26.6016	25.9778	24.4719	25.0849	25.3418	27.1769			0.0705672	0.1841	Q9UIG0	Tyrosine-protein kinase BAZ1B	BAZ1B
24.9434	25.2008	25.4359	24.7544	25.2784	25.2296			0.184007	-0.105899	Q96FZ2;E7EMP6;D6R9T3;D6RAZ3;D6RAI0;D6RGK7	Embryonic stem cell-specific 5-hydroxymethylcytosine-binding protein	HMCES
25.2889	25.5179	25.3749	24.8206	25.1747	25.4142			0.62654	-0.257401	Q9NR45;Q5TBR0;Q5TBR1	Sialic acid synthase	NANS
25.6618	25.6538	25.5972	25.9106	26.0025	26.0013			3.09617	0.333867	P63000;P60763	Ras-related C3 botulinum toxin substrate 1;Ras-related C3 botulinum toxin substrate 3	RAC1;RAC3
24.999	25.2645	25.2799	25.1287	24.9348	25.1347			0.439299	-0.115067	O14617;A0A087WYN6;K7ELX8	AP-3 complex subunit delta-1	AP3D1
25.7815	25.4524	25.7167	25.5805	25.6997	25.7078			0.0389344	0.0124664	P05198;G3V4T5;H0YJS4	Eukaryotic translation initiation factor 2 subunit 1	EIF2S1
23.6158	22.4734	22.0588	23.7085	24.1527	23.9398			1.18541	1.21765	Q10567;C9J1E7;H7C034	AP-1 complex subunit beta-1	AP1B1
24.5066	24.809	24.4191	24.8859	24.3266	24.4382			0.0460978	-0.0279999	O94925;H7BZD1	Glutaminase kidney isoform, mitochondrial	GLS
22.6148	26.9222	26.6583	26.7322	26.8103	26.2216			0.351473	1.18959	P04181	Ornithine aminotransferase, mitochondrial;Ornithine aminotransferase, hepatic form;Ornithine aminotransferase, renal form	OAT
25.866	25.4909	25.3876	25.5765	25.5142	25.8206			0.117038	0.0556005	P23368	NAD-dependent malic enzyme, mitochondrial	ME2
25.2202	25.111	24.9819	24.7074	24.6462	24.8653			1.73523	-0.364733	O43813;E9PHS0;F8WDS9	LanC-like protein 1	LANCL1
22.0472	23.519	24.9491	24.6655	24.6741	24.9638			0.680435	1.26272	G3V529;Q9GZR7;F5GYL3;A0A087WXU8	ATP-dependent RNA helicase DDX24	DDX24
24.1193	24.3218	24.2457	24.4383	24.407	24.0962			0.27442	0.0848993	C9JUT4;A0A087WZF1;Q93052;C9JXK9;C9JE51;C9J2R5;C9JIY7;C9JT42;C9J3U9;C9J1K7;C9J5C8;C9J4E3	Lipoma-preferred partner	LPP
24.0542	25.7236	26.1024	24.7775	25.4554	26.1996			0.0869859	0.1841	Q8TEM1	Nuclear pore membrane glycoprotein 210	NUP210
24.6998	25.4737	26.3842	25.1272	25.9714	25.5824			0.025279	0.0410995	P39748;I3L3E9;F5H1Y3	Flap endonuclease 1	FEN1
25.176	25.3966	25.3354	25.1731	25.2968	25.1546			0.522645	-0.0945002	Q8TCJ2	Dolichyl-diphosphooligosaccharide--protein glycosyltransferase subunit STT3B	STT3B
26.5475	26.5848	26.6501	26.7554	26.821	26.428			0.231912	0.0739988	P67775;E5RI56	Serine/threonine-protein phosphatase 2A catalytic subunit alpha isoform	PPP2CA
23.6497	23.2267	25.3184	25.3316	24.9038	25.1185			0.74299	1.05302	Q9HD45;Q5TB53	Transmembrane 9 superfamily member 3	TM9SF3
25.5686	26.2806	25.8744	26.0457	25.6917	26.0065			0.00949363	0.00676727	A6NLN1;K7ES59;K7EK45;K7ELW5;A0A087WUW5;A0A087WU68;X6R242		PTBP1
24.8808	24.2146	24.606	25.0373	24.326	24.5001			0.0651996	0.0539996	P54652	Heat shock-related 70 kDa protein 2	HSPA2
24.7089	24.3402	24.4108	24.8725	24.6448	24.3812			0.332061	0.1462	Q9NR12;D6RF83;H7BYK4;D6RH06;D6RAN1	PDZ and LIM domain protein 7	PDLIM7
23.2349	25.164	24.685	25.6817	25.9675	26.1827			1.24311	1.58268	Q9Y5L0;E9PFH4;C9J7E5	Transportin-3	TNPO3
26.8235	26.7924	26.4968	26.8121	26.9728	26.9598			0.841779	0.210667	A0A087X2I1;P62333;H0YJC0;H0YJS8;H0YJX2;H0YJE9;H0YJT1	26S protease regulatory subunit 10B	PSMC6
24.9113	24.9257	25.0657	25.2241	25.1832	25.2621			2.03444	0.255567	A0A087WXC5;E7ESZ7;O95299;Q8N1B9;C9J6X0;H7C2W5;H7C1Y7;H7C2X4	NADH dehydrogenase [ubiquinone] 1 alpha subcomplex subunit 10, mitochondrial	NDUFA10
24.6144	24.8211	24.6812	24.5142	24.9227	24.9535			0.232311	0.0912336	O43242	26S proteasome non-ATPase regulatory subunit 3	PSMD3
25.723	25.8296	25.6851	25.7657	25.8727	25.6793			0.139523	0.0266666	P05455;E7ERC4;E9PFL9;E9PGX9	Lupus La protein	SSB
24.7113	25.165	24.9534	24.8204	25.1277	25.0678			0.142658	0.062067	P43304;F5GYK7	Glycerol-3-phosphate dehydrogenase, mitochondrial	GPD2
25.6508	25.5691	25.6582	26.0819	25.6695	25.6798			0.594041	0.184367	P49755;G3V2K7	Transmembrane emp24 domain-containing protein 10	TMED10
26.2739	26.9553	26.5105	26.3955	26.4331	26.5268			0.249311	-0.128099	P57088;D6RAA6;H0Y8N0;J3KN43;D6RBY2	Transmembrane protein 33	TMEM33
26.5114	26.6935	26.7041	26.6621	26.6414	26.9372			0.412171	0.110566	P61981	14-3-3 protein gamma;14-3-3 protein gamma, N-terminally processed	YWHAG
26.0301	26.6414	26.6359	26.2327	26.5556	26.2851			0.126343	-0.0779998	P62277;J3KMX5	40S ribosomal protein S13	RPS13
26.9553	27.2661	27.7227	27.1724	27.6072	28.2486			0.398125	0.361367	P62829;J3KTJ3;J3KT29;C9JD32;J3QQT9;B9ZVP7	60S ribosomal protein L23	RPL23
25.5984	25.4685	25.4049	26.5973	26.1205	25.4974			0.833118	0.581134	P30044	Peroxiredoxin-5, mitochondrial	PRDX5
23.9408	24.0144	23.9918	24.3365	23.8084	23.9351			0.0989464	0.0443331	Q9H7D0;H0Y7N4;A0A096LNH6;Q14185	Dedicator of cytokinesis protein 5	DOCK5
26.0648	26.4351	26.5706	26.5255	26.5819	26.4296			0.420707	0.155499	P63241;I3L397;I3L504;Q6IS14;F8WCJ1;C9J7B5;C9J4W5;Q9GZV4	Eukaryotic translation initiation factor 5A-1;Eukaryotic translation initiation factor 5A;Eukaryotic translation initiation factor 5A-1-like;Eukaryotic translation initiation factor 5A-2	EIF5A;EIF5AL1;EIF5A2
25.6653	25.5316	25.2379	25.1689	25.2623	25.5498			0.371507	-0.151267	P38606;C9JA17;C9JVW8	V-type proton ATPase catalytic subunit A	ATP6V1A
24.774	24.7805	24.867	25.3327	25.2629	25.1132			2.41458	0.429099	H0YN88;A0A075B716;P08708;H0YN73	40S ribosomal protein S17	RPS17
26.632	26.6716	26.7144	27.0677	26.813	27.0194			1.64334	0.294033	P30050	60S ribosomal protein L12	RPL12
25.1134	25.4071	25.1424	25.059	25.1145	25.218			0.361375	-0.0904668	P38117;M0QY67	Electron transfer flavoprotein subunit beta	ETFB
25.5987	25.8331	26.117	25.8988	25.629	26.118			0.0540865	0.0323334	Q9Y263;E5RIM3;H0YBW4;H0YC16;H0YAU9	Phospholipase A-2-activating protein	PLAA
25.4115	25.3123	25.3184	25.8798	25.4248	25.4076			0.637946	0.223334	P08758;E9PHT9;D6RBE9;D6RBL5;D6RCN3	Annexin A5;Annexin	ANXA5
26.4827	26.2334	26.0198	26.433	26.3121	26.5083			0.521025	0.1725	P31946;Q4VY20;Q4VY19;A0A0J9YWE8;A0A0J9YWZ2	14-3-3 protein beta/alpha;14-3-3 protein beta/alpha, N-terminally processed	YWHAB
27.9924	28.7575	28.3884	28.2141	28.4205	28.6479			0.0659579	0.0480671	P62753;A2A3R7;A2A3R5	40S ribosomal protein S6	RPS6
28.6553	28.7711	28.8165	28.8429	28.8643	29.0162			1.0353	0.160166	P62979;J3QS39;J3QTR3;F5H6Q2;F5GYU3;F5H2Z3;F5H265;B4DV12;F5H388;F5H747;F5GXK7;J3QKN0;Q5PY61;Q96C32;P62987;P0CG47;P0CG48;M0R1V7;M0R1M6;M0R2S1;J3QSA3;F5GZ39	Ubiquitin-40S ribosomal protein S27a;Ubiquitin;40S ribosomal protein S27a;Ubiquitin-60S ribosomal protein L40;Ubiquitin;60S ribosomal protein L40;Polyubiquitin-B;Ubiquitin;Polyubiquitin-C;Ubiquitin	RPS27A;UBB;UBC;UBA52
25.4446	25.6789	25.6025	25.8823	25.7506	25.5133			0.47402	0.140067	P25786;F5GX11;B4DEV8	Proteasome subunit alpha type-1	PSMA1
27.0456	27.6984	27.3376	27.3407	27.3374	27.6729			0.153056	0.0897992	Q02543;M0R3D6;M0R1A7;M0R117;M0R0P7	60S ribosomal protein L18a	RPL18A
26.7165	27.072	27.0561	26.8306	26.8086	27.166			0.0269049	-0.0131334	P40429;M0QYS1;Q8J015;Q6NVV1;M0QZU1	60S ribosomal protein L13a;Putative 60S ribosomal protein L13a protein RPL13AP3	RPL13A;RPL13a;RPL13AP3
24.6451	25.1672	24.8155	25.2124	25.2488	25.2738			1.1216	0.369067	P05556;C9JPK5;E7ERX5;Q5T3E6;E9PLR6;E7EUI6;E7EQW5	Integrin beta-1	ITGB1
27.0359	27.4105	27.3673	27.1098	27.6955	27.483			0.310275	0.1582	P62913;Q5VVC8;Q5VVC9	60S ribosomal protein L11	RPL11
23.0852	25.7614	25.4381	25.9129	26.278	25.8947			0.674794	1.26697	G3V4W0;B4DY08;B2R5W2;G3V4C1;G3V576;G3V2Q1;P07910;G3V555;G3V575;G3V2D6;A0A0G2JPF8;A0A0G2JNQ3;P0DMR1;O60812;B7ZW38;B2RXH8;G3V5X6;G3V3K6;G3V251;G3V5V7;B4DSU6;G3V2H6;G3V4M8	Heterogeneous nuclear ribonucleoproteins C1/C2;Heterogeneous nuclear ribonucleoprotein C-like 4;Heterogeneous nuclear ribonucleoprotein C-like 1;Heterogeneous nuclear ribonucleoprotein C-like 3;Heterogeneous nuclear ribonucleoprotein C-like 2	HNRNPC;HNRNPCL4;HNRNPCL1;HNRNPCL3;HNRNPCL2
26.5164	26.7178	26.8283	26.3616	26.6392	26.8872			0.11969	-0.0581665	P00966;Q5T6L5;Q5T6L6	Argininosuccinate synthase	ASS1
24.9349	25.3652	25.2738	25.382	24.859	25.4147			0.0417175	0.0272662	P43686	26S protease regulatory subunit 6B	PSMC4
25.3077	26.0961	25.6225	25.9745	25.9855	25.6783			0.336574	0.204001	P20042	Eukaryotic translation initiation factor 2 subunit 2	EIF2S2
25.2845	25.727	25.3797	25.4028	25.4797	25.4366			0.0611775	-0.0240332	Q14137;A0A075B729	Ribosome biogenesis protein BOP1	BOP1
25.5588	25.5941	25.3628	25.6291	25.5196	25.4032			0.0423436	0.0120665	P24752;H0YEL7;E9PKF3;E9PRQ6	Acetyl-CoA acetyltransferase, mitochondrial	ACAT1
26.1951	26.3671	25.8623	26.1512	25.9107	25.9261			0.362928	-0.145501	Q9NZI8	Insulin-like growth factor 2 mRNA-binding protein 1	IGF2BP1
24.6089	24.8361	24.4408	25.1948	24.7554	25.0189			0.986972	0.3611	Q9Y6N5;H3BNX3;H3BV36;H3BMS6;H3BT21;H3BUD7;H3BNP9	Sulfide:quinone oxidoreductase, mitochondrial	SQRDL
25.534	25.2618	24.9391	26.0438	24.9532	25.7528			0.386519	0.338299	P23381;G3V277;G3V3X0;G3V3P2;G3V227;H0YJP3;G3V3H8;G3V3Y5;G3V4C7;G3V4N8;G3V5W1;G3V3S7;G3V423;G3V456;G3V2Y7;G3V2F2;G3V3R3;G3V4S4;G3V313;G3V339;G3V2C0;G3V5H5;P78534;G3V4A3;G3V4Q0;G3V4N0	Tryptophan--tRNA ligase, cytoplasmic;T1-TrpRS;T2-TrpRS	WARS
24.6751	24.6928	25.0213	24.923	24.9866	25.0164			0.704523	0.178933	Q9UHB9	Signal recognition particle subunit SRP68	SRP68
24.7896	25.0924	24.9471	24.6191	24.5504	24.7954			1.18914	-0.288066	A0A087X2D8;O60271;D6RHI8;H0YBE9;H0YBS5;E9PFH7;A0A087WYG2;Q9UPT6	C-Jun-amino-terminal kinase-interacting protein 4	SPAG9
26.4182	26.0846	26.0365	26.1086	26.4258	26.1267			0.0915381	0.0405998	Q9NR09	Baculoviral IAP repeat-containing protein 6	BIRC6
25.1049	25.125	25.1175	24.9029	24.802	25.1124			0.899761	-0.1767	P48506;E1CEI4;A0A0C4DGB2;D6R959;H0YAB6;H0Y9I7;D6RGF8;D6REX4	Glutamate--cysteine ligase catalytic subunit	GCLC
25.2132	25.3582	25.2242	25.1548	25.2899	25.3298			0.0336802	-0.00703303	Q9Y2L1;G3V1J5;F2Z2C0	Exosome complex exonuclease RRP44	DIS3
25.007	25.4799	25.4829	24.7167	25.6993	25.342			0.0757127	-0.0706005	Q9UBE0;M0QZS6;B3KNJ4;M0QX65;M0R375;M0R054;M0R286;M0QYM8	SUMO-activating enzyme subunit 1;SUMO-activating enzyme subunit 1, N-terminally processed	SAE1
25.3822	25.5462	25.4775	24.8829	25.646	24.9895			0.536349	-0.295834	Q99575;E5RK39	Ribonucleases P/MRP protein subunit POP1	POP1
25.5657	25.73	25.743	25.4282	25.7872	25.8782			0.041906	0.0183004	H7BY10;K7EJV9;K7ERT8;A8MUS3;P62750;K7EMA7	60S ribosomal protein L23a	RPL23A
24.4964	24.8309	25.0129	24.3884	24.8234	24.957			0.0887889	-0.0571334	Q96HE7;G3V5B3;G3V3E6;G3V2H0;G3V503	ERO1-like protein alpha	ERO1L
25.6674	25.7618	25.5952	25.5809	25.98	26.4607			0.571117	0.332399	Q13162;H7C3T4;A6NG45;A6NJJ0	Peroxiredoxin-4	PRDX4
26.4247	27.1788	27.0858	26.5278	27.2465	26.4661			0.163078	-0.149633	P35637;H3BPE7	RNA-binding protein FUS	FUS
28.788	29.148	28.9789	27.7264	27.9297	29.0485			0.803406	-0.736767	Q8WYP5	Protein ELYS	AHCTF1
24.7724	25.7337	24.955	26.1631	25.4792	25.1251			0.440844	0.435433	Q04837;A0A0G2JLD8;E7EUY5;C9K0U8	Single-stranded DNA-binding protein, mitochondrial	SSBP1
25.708	26.0014	25.7914	25.7632	25.8143	25.7182			0.30373	-0.0683664	B4DY09;Q12905;X6R6Z1;A0A0A0MRL0	Interleukin enhancer-binding factor 2	ILF2
25.1327	25.0896	24.7255	25.6244	25.2078	25.2884			1.01056	0.390933	Q7Z2K6;E7ER77;A0A0C4DGF0	Endoplasmic reticulum metallopeptidase 1	ERMP1
26.2355	26.0026	26.137	26.3129	25.9961	25.3909			0.332811	-0.225067	Q9UMS4;F5GY56;H0YGF3;F5H2I0;H0YGZ5	Pre-mRNA-processing factor 19	PRPF19
26.3165	26.0977	26.1378	26.2877	26.3376	25.8411			0.0575019	-0.0285327	P62191	26S protease regulatory subunit 4	PSMC1
26.2782	26.1005	26.654	26.3422	26.4943	26.4153			0.162508	0.0730337	P37802;X6RJP6	Transgelin-2	TAGLN2
25.635	25.5692	25.7226	25.8358	25.4075	25.5326			0.138009	-0.0503006	P60228;E5RGA2;H0YAW4;H0YBR5;E5RHS5;E5RIT4;E5RIP5;E5RJ25;H0YBP5;E5RII3	Eukaryotic translation initiation factor 3 subunit E	EIF3E
25.6392	25.8241	26.5027	25.8713	26.4035	25.6493			0.0133892	-0.0139675	Q13501;E7EMC7;E9PFW8;E3W990;D6RBF1;C9J6J8;C9JRJ8	Sequestosome-1	SQSTM1
25.8246	25.8293	25.7901	25.6838	25.8377	25.6595			0.699435	-0.0876668	Q14847;C9J9W2;K7ESD6;F6S2S5;J3KSN1	LIM and SH3 domain protein 1	LASP1
26.2116	26.6228	26.1028	25.7162	26.486	26.9456			0.0621845	0.0702	P27694;I3L4R8;I3L2M5;I3L524	Replication protein A 70 kDa DNA-binding subunit;Replication protein A 70 kDa DNA-binding subunit, N-terminally processed	RPA1
26.4062	26.8446	26.6081	26.7514	26.9854	26.6959			0.546922	0.191266	Q5T5C7;P49591	Serine--tRNA ligase, cytoplasmic	SARS
24.8374	25.2874	25.2907	25.1708	25.5792	25.468			0.620779	0.2675	K4DI93;Q13620;A6NE76;A0A087WWN2	Cullin-4B	CUL4B
24.9462	25.0107	25.0082	24.7642	24.6658	24.6995			2.83415	-0.278533	Q15008;C9J0E9;H7C531;C9J7B7	26S proteasome non-ATPase regulatory subunit 6	PSMD6
27.0228	27.2413	26.9375	27.1925	27.1012	26.9677			0.0620426	0.0199324	A0A0A0MRA5;B7Z4B8;Q9BUJ2;M0R3F1;M0QYZ0;M0R203;M0QZV6;M0R0K8;M0QYI8;M0QYM5	Heterogeneous nuclear ribonucleoprotein U-like protein 1	HNRNPUL1
25.0931	25.065	24.2987	24.0678	26.0938	24.4336			0.0228116	0.046133	A0A0C4DGZ0;P24928;A0A087WWE2	DNA-directed RNA polymerase;DNA-directed RNA polymerase II subunit RPB1	POLR2A
23.3174	25.5927	22.4159	24.4825	25.0229	24.4348			0.379788	0.871408	Q92896;H3BM42;H3BRD8;H3BQU9	Golgi apparatus protein 1	GLG1
25.0457	26.0293	25.0398	25.3726	25.8055	25.465			0.190326	0.1761	A0AVT1;H0Y8S8;H0Y9U5	Ubiquitin-like modifier-activating enzyme 6	UBA6
25.4619	25.7658	25.6075	25.5339	25.3966	25.4466			0.724254	-0.1527	P08559;Q5JPU3;Q5JPU0;Q5JPU1;Q5JPT9;Q5JPU2;P29803	Pyruvate dehydrogenase E1 component subunit alpha, somatic form, mitochondrial	PDHA1
24.7357	25.2307	25.0487	25.062	24.4423	25.3604			0.0564838	-0.0501334	Q9P265;Q14689	Disco-interacting protein 2 homolog B	DIP2B
25.5235	25.3996	25.1698	25.7928	25.481	25.4166			0.568789	0.199167	O15438;H0Y8Q6	Canalicular multispecific organic anion transporter 2	ABCC3
26.0728	26.7505	26.6189	26.0918	26.843	26.8592			0.131803	0.117267	Q9UHD1;E9PPQ5;E9PIZ4;E9PSD5;E9PHZ2;E9PL00	Cysteine and histidine-rich domain-containing protein 1	CHORDC1
22.2814	25.0327	23.1166	24.831	24.4315	24.787			0.663263	1.20627	A0A087WYN9;Q7Z478	ATP-dependent RNA helicase DHX29	DHX29
26.5036	26.8464	26.7553	26.8109	26.8278	26.8267			0.512539	0.120034	Q13509;A0A0B4J269;G3V2A3;G3V5W4;G3V2R8;G3V3R4;G3V2N6;G3V3J6;G3V3W7	Tubulin beta-3 chain	TUBB3
24.8432	25.0011	25.0431	25.1261	25.3228	25.1102			1.15037	0.2239	Q9Y2X3;H7BZ72;F8WED0	Nucleolar protein 58	NOP58
24.9421	25.0528	25.0673	25.6019	25.2591	25.25			1.33649	0.3496	Q6DD88;F5H6I7;F5GWF8	Atlastin-3	ATL3
25.2498	25.4706	24.9885	25.4922	25.1669	25.2953			0.185455	0.0818335	B0YIW6;P48444;Q6P1Q5;E9PK34	Coatomer subunit delta	ARCN1
26.1468	26.3107	26.0752	26.4653	26.6227	26.28			1.0808	0.278434	P62906	60S ribosomal protein L10a	RPL10A
25.3252	25.3733	25.5435	25.3979	25.6451	25.5504			0.526828	0.117133	O00231;J3QRY4;J3QS13	26S proteasome non-ATPase regulatory subunit 11	PSMD11
24.9846	25.5028	25.1421	24.8844	25.0863	25.0626			0.526445	-0.198734	Q96TA1	Niban-like protein 1	FAM129B
27.2095	26.8076	26.6847	26.9613	26.7813	26.84			0.0842132	-0.0397333	P30043;M0R192;M0QZL1	Flavin reductase (NADPH)	BLVRB
25.6219	25.7697	25.4336	25.3828	25.5451	25.5122			0.516025	-0.128367	Q8IY81;J3KS36	pre-rRNA processing protein FTSJ3	FTSJ3
26.0321	26.343	26.0322	25.8309	26.1576	25.6031			0.6412	-0.2719	Q15019;B5MCX3;C9J2Q4;C9J938;H7C310;C9JB25;C9IY94;C9IZU3;H7C2Y0;C9JQJ4;B5MD47;C9JZI2;C9JT15;C9JSE7;C9JFT1;F8WB65	Septin-2	2002-09-01
25.5498	25.8588	25.7745	25.2904	25.6419	25.8083			0.34228	-0.147501	A0A087WUT6;O60841	Eukaryotic translation initiation factor 5B	EIF5B
24.5983	24.8214	24.808	25.1306	24.9222	24.7867			0.760237	0.203932	O00232	26S proteasome non-ATPase regulatory subunit 12	PSMD12
24.6138	24.9094	25.0632	25.173	25.2041	24.9132			0.660443	0.234633	Q9BZE1;S4R369;A6NHR2;H0Y4J2	39S ribosomal protein L37, mitochondrial	MRPL37
25.0825	25.883	25.7198	25.6859	25.8581	25.9346			0.445631	0.264434	P40261	Nicotinamide N-methyltransferase	NNMT
27.6006	27.8069	28.1245	27.5555	27.8297	27.8808			0.185074	-0.0886663	P15880;E9PQD7;H0YEN5;E9PMM9;E9PPT0;I3L404;E9PM36;H3BNG3;H0YE27	40S ribosomal protein S2	RPS2
26.8212	26.5572	26.5447	27.1116	26.6675	26.9822			0.809157	0.279401	Q15437;Q5QPE2;Q5QPE1	Protein transport protein Sec23B	SEC23B
24.7067	25.0591	25.2797	24.9315	25.2006	25.0166			0.0648031	0.0344003	F8WAE5;Q9BY44;C9IZE1;F8WF18;F8WAT3;H7C5Q3;H7C5R5	Eukaryotic translation initiation factor 2A;Eukaryotic translation initiation factor 2A, N-terminally processed	EIF2A
25.463	25.24	25.2651	25.3923	25.2083	25.5661			0.204375	0.0661996	P17174	Aspartate aminotransferase, cytoplasmic	GOT1
25.2988	25.742	25.6908	25.3722	25.8418	25.6856			0.102416	0.0560004	P42166	Lamina-associated polypeptide 2, isoform alpha;Thymopoietin;Thymopentin	TMPO
26.4381	26.6106	26.6437	26.8071	26.5914	26.6984			0.688712	0.134834	P31689	DnaJ homolog subfamily A member 1	DNAJA1
25.7184	25.4596	25.5845	25.7573	25.3039	25.3179			0.313644	-0.1278	P23786	Carnitine O-palmitoyltransferase 2, mitochondrial	CPT2
25.4878	25.2283	25.1793	25.0149	25.5236	25.2145			0.0963706	-0.0474669	Q9Y223	Bifunctional UDP-N-acetylglucosamine 2-epimerase/N-acetylmannosamine kinase;UDP-N-acetylglucosamine 2-epimerase (hydrolyzing);N-acetylmannosamine kinase	GNE
25.3654	25.0464	25.2226	25.003	24.8587	25.0056			1.15349	-0.2557	Q8IZW8	Tensin-4	TNS4
26.3514	26.2255	26.1097	26.6724	26.3056	26.102			0.293583	0.131133	E7EQR4;P15311	Ezrin	EZR
26.7262	26.816	26.9425	27.1252	26.6742	26.9377			0.226903	0.0841338	Q15181;Q5SQT6	Inorganic pyrophosphatase	PPA1
26.2569	26.3959	26.2382	25.5765	26.4142	26.5779			0.125248	-0.107467	Q9HD20;H7C3H2	Manganese-transporting ATPase 13A1	ATP13A1
24.5329	24.3621	22.9295	24.2352	24.4084	24.5105			0.35877	0.4432	B7Z6D5;Q96GQ7;A0A087X059;A0A087WYH5	Probable ATP-dependent RNA helicase DDX27	DDX27
26.2464	26.3742	26.6203	26.3483	26.4972	26.3094			0.0818771	-0.0286668	J3QT28;O43684;J3QSX4	Mitotic checkpoint protein BUB3	BUB3
25.976	26.5172	26.1418	26.2063	26.476	26.4577			0.389504	0.168334	Q9BSJ8;F8VZB1	Extended synaptotagmin-1	ESYT1
24.7791	24.6724	24.821	24.2497	24.5683	24.5762			1.18364	-0.292766	Q9Y3T9	Nucleolar complex protein 2 homolog	NOC2L
26.3465	26.2178	26.3792	26.3873	26.4443	26.2305			0.187167	0.039533	G3V0I5;P49821;B4DE93;E9PQP1;E9PLC6;E9PMX3;E9PPR0;E9PJL9;H0YE81;E9PPD6;E9PPS5;H0YD04	NADH dehydrogenase [ubiquinone] flavoprotein 1, mitochondrial	NDUFV1
26.7773	26.9229	26.9126	26.7102	26.9889	26.9675			0.0615731	0.0179335	P27797;K7EJB9;K7EL50	Calreticulin	CALR
27.2038	27.7553	28.011	27.476	27.6994	27.8264			0.0134776	0.0105667	P62917;E9PKU4;E9PP36;E9PKZ0;G3V1A1	60S ribosomal protein L8	RPL8
25.7465	26.1863	25.9297	25.9092	25.9827	26.1503			0.153103	0.0598996	J3KN16;Q5VYK3;R4GMY1;R4GMY3;F6XAQ5	Proteasome-associated protein ECM29 homolog	KIAA0368;ECM29
25.4183	23.1355	25.7254	26.0013	25.7391	25.8342			0.599151	1.09848	Q9UIA9;E7ESC6;E5RIW1;H0YBE1;A0A087WTZ2;Q9H2T7	Exportin-7	XPO7
26.7579	27.0494	26.7132	26.9456	27.1652	26.9576			0.648687	0.182633	O60506;F6UXX1	Heterogeneous nuclear ribonucleoprotein Q	SYNCRIP
25.9812	26.798	26.1584	26.1183	26.5631	26.4079			0.0626972	0.050567	P06576;H0YH81;F8W079;F8W0P7;H0YI37	ATP synthase subunit beta, mitochondrial;ATP synthase subunit beta	ATP5B
25.4239	26.343	26.2812	25.6192	26.1484	26.0898			0.0649757	-0.0635675	P52597	Heterogeneous nuclear ribonucleoprotein F;Heterogeneous nuclear ribonucleoprotein F, N-terminally processed	HNRNPF
29.1349	29.0081	29.0137	29.1714	29.4151	29.4347			1.42305	0.288167	P52895;B4DK69;A0A0A0MSD5;S4R3P0	Aldo-keto reductase family 1 member C2	AKR1C2
26.0097	26.2382	26.1215	25.9478	26.215	26.3512			0.130643	0.0482	Q9UJS0;R4GN64	Calcium-binding mitochondrial carrier protein Aralar2	SLC25A13
28.8726	28.881	28.8676	29.0946	29.1285	28.9091			1.17258	0.170333	B4DLR8;P15559;H3BNV2;H3BRK3	NAD(P)H dehydrogenase [quinone] 1	NQO1
27.0924	27.469	27.4461	27.5438	27.3265	27.6356			0.472074	0.166133	J3QR09;J3KTE4;P84098;J3QL15	Ribosomal protein L19;60S ribosomal protein L19	RPL19
29.8071	30.3012	30.1749	30.0919	30.3352	30.3809			0.432142	0.174932	Q5JP53;P07437;Q5ST81	Tubulin beta chain	TUBB
27.1614	27.4673	27.8004	27.3685	27.9733	27.7602			0.366521	0.2243	Q01650;A0A0C4DGL4;H0YJ95;G3V4Z6;Q9UM01;Q92536	Large neutral amino acids transporter small subunit 1	SLC7A5
27.2413	27.3052	26.9428	27.2233	26.8422	27.3041			0.077632	-0.0399005	Q9UBM7;E9PJ54;H0YE57;E9PM00;E9PRL8;E9PQ71;E9PIP9	7-dehydrocholesterol reductase	DHCR7
26.1197	27.1154	26.4873	26.2959	26.4372	26.5305			0.196884	-0.152933	P43246;E9PHA6;V9H019;A0A087X078;A0A087X1E7;V9H0B2;V9H015;C9J809	DNA mismatch repair protein Msh2	MSH2
25.8949	25.6337	25.8117	25.9342	26.0343	25.7331			0.440233	0.120434	P00492	Hypoxanthine-guanine phosphoribosyltransferase	HPRT1
25.5758	25.8743	25.3272	25.8014	25.7749	25.7414			0.493727	0.180133	G3V1Q4;E7ES33;E7EPK1;Q16181;A0A0U1RRM2;A0A0U1RRE1;Q5JXL7;A0A0U1RRH9;Q6ZU15	Septin-7	2007-09-01
27.6727	27.9202	27.7252	27.6958	27.7071	28.0929			0.14612	0.0592327	P15529	Membrane cofactor protein	CD46
27.8536	28.25	28.2699	28.4556	28.6232	28.6732			1.41954	0.459501	Q9Y277;E5RJN6;E5RHZ6;E5RHE1;E5RFP6;E5RK27;E5RFL1	Voltage-dependent anion-selective channel protein 3	VDAC3
24.6162	24.8819	24.9656	25.1873	25.0219	24.9794			0.917926	0.241634	Q96PK6;A0A0A6YYI9;F8WDX3;A0A0A0MSL8;B8ZZ74	RNA-binding protein 14	RBM14
25.221	25.8413	25.4289	25.7873	25.6903	25.3596			0.198487	0.115334	P54577;A0A0C4DGZ5	Tyrosine--tRNA ligase, cytoplasmic;Tyrosine--tRNA ligase, cytoplasmic, N-terminally processed;Tyrosine--tRNA ligase	YARS
24.843	25.5061	25.6538	25.3892	25.8044	25.5864			0.395634	0.259033	O76003	Glutaredoxin-3	GLRX3
26.1164	26.039	25.944	26.166	26.1082	25.8873			0.0737731	0.0207005	E7EX90;Q14203;Q6AWB1;E7EWF7;C9J1B7;C9JZA4;C9JTE5;C9JJN7;C9JJD0;C9JKG6;E9PCY0	Dynactin subunit 1	DCTN1;DKFZp686E0752
25.493	25.7311	25.7831	25.1087	25.2717	25.2671			1.91582	-0.453234	P49790	Nuclear pore complex protein Nup153	NUP153
26.0565	26.1207	25.661	24.5339	25.8618	25.9776			0.430709	-0.4883	O75691	Small subunit processome component 20 homolog	UTP20
25.8609	26.2033	25.8898	26.105	26.4511	26.543			1.03849	0.381699	P42285;H0YAC4;H0Y8U3	Superkiller viralicidic activity 2-like 2	SKIV2L2
25.1267	25.2598	25.4265	24.9398	25.3565	25.2993			0.17546	-0.0724665	Q5SRE5;H7C4K7	Nucleoporin NUP188 homolog	NUP188
25.4753	25.969	26.1411	25.6169	26.0336	25.5409			0.201242	-0.131334	O60264	SWI/SNF-related matrix-associated actin-dependent regulator of chromatin subfamily A member 5	SMARCA5
25.2781	25.4442	25.2795	25.6011	25.1239	25.5902			0.248119	0.104467	A0A0U1RRM8;H0YJ34;Q96AC1;H0YJB6;G3V3J0	Fermitin family homolog 2	FERMT2
25.2874	25.6298	25.3067	25.6167	25.5595	25.6136			0.771618	0.188633	C9JIS1;C9JXA5;P62879;C9JZN1;E7EP32;Q9HAV0;F5H8J8;F5H100;F5H0S8;E9PCP0;P16520;C9JD14;H7C5J5	Guanine nucleotide-binding protein G(I)/G(S)/G(T) subunit beta-2	GNB2
26.1712	26.1832	26.2688	26.8267	26.3351	26.0788			0.391941	0.2058	P05388;F8VU65;F8VWS0;F8VQY6;F8VPE8;F8VRK7;G3V210;Q8NHW5;F8VS58;F8VW21;F8VZS0;F8VWV4;F8W1K8	60S acidic ribosomal protein P0;60S acidic ribosomal protein P0-like	RPLP0;RPLP0P6
28.3256	28.9016	28.858	28.8839	28.935	28.8803			0.477621	0.204667	P62805	Histone H4	HIST1H4A
26.8413	26.8257	26.4648	26.7565	26.7824	26.5784			0.0114987	-0.00483322	P61158;B4DXW1;F8WDR7;F8WEW2;F8WE84;A0A0A0MTI9;H7C4J1;C9IZN3;Q9C0K3;Q9P1U1	Actin-related protein 3	ACTR3
26.1367	26.1747	25.9918	26.4074	26.4048	26.717			1.59326	0.408667	Q8TEX9;H0YN14;H0YMR4;H0YN07;H0YK93;H0YLV0;H0YL92;H0YKG5	Importin-4	IPO4
26.0704	26.32	26.2819	26.3843	26.3789	26.256			0.584831	0.115634	H3BR35;P15170;H3BSV8	Eukaryotic peptide chain release factor GTP-binding subunit ERF3A	GSPT1
22.8361	25.6965	25.9419	25.4463	25.5632	26.5733			0.416411	1.03612	Q8TAT6;I3L283;A0A0D9SFI9;I3L4U9;I3L281;I3L3I1	Nuclear protein localization protein 4 homolog	NPLOC4
24.7752	25.1617	24.7722	25.6122	25.2718	25.2915			1.34459	0.4888	O96005;K7EQQ1;K7ERL5	Cleft lip and palate transmembrane protein 1	CLPTM1
25.4047	25.9059	25.8604	25.4699	26.0259	26.0943			0.213193	0.139701	P46977;A0A0C4DH80;E9PN73;E9PI32;H0YET6	Dolichyl-diphosphooligosaccharide--protein glycosyltransferase subunit STT3A	STT3A
24.9186	25.4337	25.1005	25.1038	25.0746	25.1273			0.117733	-0.0490335	Q9Y2A7	Nck-associated protein 1	NCKAP1
25.3419	25.444	25.3644	25.6917	25.2061	25.57			0.286439	0.105833	Q08257;C9JH92;A6NP24	Quinone oxidoreductase	CRYZ
25.7362	26.3052	26.2626	25.6741	25.7634	26.0676			0.538244	-0.2663	Q12769;G3V198;E9PR16;E9PSI3	Nuclear pore complex protein Nup160	NUP160
28.0835	28.2961	28.3814	28.1876	28.6825	28.7793			0.658838	0.296134	B5MDF5;P62826;J3KQE5;F5H018;B4DV51;H0YFC6;A0A087X0W0	GTP-binding nuclear protein Ran	RAN
26.2178	26.5969	26.3638	26.2449	26.042	26.5002			0.308414	-0.130467	O00763;F8W8T8;H0YGH5;A0A087WUA1	Acetyl-CoA carboxylase 2;Biotin carboxylase	ACACB
25.6682	25.8722	25.5216	25.5426	25.8459	25.8248			0.131509	0.0504335	P20700;E9PBF6;A0A0D9SFE5;A0A0D9SFY5	Lamin-B1	LMNB1
26.715	27.1508	26.9773	26.9028	27.0221	27.0783			0.144841	0.0533663	Q96N66;A9C4B8;M0R1Z5;H7C2M4;C9J4E9;A0A0G2JNX6	Lysophospholipid acyltransferase 7	MBOAT7
27.3029	27.6586	27.6094	27.6395	27.6761	27.7254			0.617379	0.1567	Q05639	Elongation factor 1-alpha 2	EEF1A2
24.7062	25.0724	25.2505	24.9674	25.1112	25.2214			0.196896	0.0903002	G3XAM7;P35221;E5RIB1;E5RG03;E5RJ41;E5RHV7;E5RGY6;E5RJZ2;E5RIT8;E5RFM3;E5RJL0;E5RIE0;E5RJP7;E5RGD2	Catenin alpha-1	CTNNA1
25.9116	25.7154	25.9178	25.8333	26.0861	25.7781			0.165618	0.0508989	P51610;A6NEM2;H7C1C4;Q9Y5Z7	Host cell factor 1;HCF N-terminal chain 1;HCF N-terminal chain 2;HCF N-terminal chain 3;HCF N-terminal chain 4;HCF N-terminal chain 5;HCF N-terminal chain 6;HCF C-terminal chain 1;HCF C-terminal chain 2;HCF C-terminal chain 3;HCF C-terminal chain 4;HCF C-terminal chain 5;HCF C-terminal chain 6	HCFC1
24.9419	25.1499	24.9349	24.9861	24.921	25.1135			0.00739088	-0.00203387	P06737;E9PK47	Glycogen phosphorylase, liver form;Alpha-1,4 glucan phosphorylase	PYGL
25.4994	26.0732	25.8958	25.6916	25.8937	26.0368			0.0927944	0.0512339	P51991;H7C1J8	Heterogeneous nuclear ribonucleoprotein A3	HNRNPA3
26.3522	26.7641	26.644	26.5196	26.7662	26.6248			0.129945	0.0501003	P31153;Q00266	S-adenosylmethionine synthase isoform type-2	MAT2A
27.3097	27.2514	27.316	27.1605	27.1565	26.9616			1.35546	-0.1995	Q9ULV4;B4E3S0;H0YHL7;F8W1H8;F8VUX3;F8VSA4;F8VRE9;F8VTT6;F8VVB7;F8VV53;J3QLV6;J3KSS5;Q6QEF8	Coronin-1C;Coronin	CORO1C
25.9606	25.5567	25.1686	26.1322	25.6807	25.6239			0.375541	0.2503	O60763;REV__R4GMN2;REV__Q5VZ89;REV__R4GNB2;REV__R4GN35	General vesicular transport factor p115	USO1
26.4191	25.7776	25.8966	26.2016	26.0153	25.7183			0.0765773	-0.0527	E9PK01;P29692;A0A087X1X7;E9PRY8;E9PPR1;E9PL12;E9PQ49;E9PI39;E9PQZ1;E9PMW7;E9PIZ1;H0YCK7;H0YE58;H0YE72;E9PQC9	Elongation factor 1-delta	EEF1D
25.274	25.3884	25.4531	25.2027	25.1128	24.8883			1.3274	-0.3039	Q8WWM7;H3BUF6;H3BSK9;H3BSQ5;H3BUE3	Ataxin-2-like protein	ATXN2L
24.5198	25.0046	25.0003	25.0589	24.9956	24.9269			0.38796	0.152234	Q9Y230;M0R0Y3;X6R2L4;M0QXI6;M0R0Z0	RuvB-like 2	RUVBL2
26.0543	25.6179	25.8015	26.0589	26.0324	26.3983			0.914743	0.338633	P07339;H7C469;H7C1V0;C9JH19;F8WD96;F8W787	Cathepsin D;Cathepsin D light chain;Cathepsin D heavy chain	CTSD
24.9085	24.4875	24.8823	25.5019	25.4837	25.2704			1.88058	0.659233	Q15637;F8WEV5;C9J792;H7C561	Splicing factor 1	SF1
25.8832	25.9044	26.4976	26.1732	26.1745	26.626			0.383895	0.2295	P33992;B1AHB1;B1AHA9;B1AHB2	DNA replication licensing factor MCM5;DNA helicase	MCM5
26.4257	26.1397	25.7319	26.4722	25.8994	26.2902			0.175286	0.121501	P10515;H0YDD4;E9PEJ4	Dihydrolipoyllysine-residue acetyltransferase component of pyruvate dehydrogenase complex, mitochondrial;Acetyltransferase component of pyruvate dehydrogenase complex	DLAT
27.8029	28.3588	28.1031	28.0058	28.7183	28.4301			0.493482	0.296466	M0R0F0;P46782;M0R0R2;M0QZN2	40S ribosomal protein S5;40S ribosomal protein S5, N-terminally processed	RPS5
28.401	29.3336	29.1697	28.2818	29.1856	29.1036			0.0977013	-0.1111	J3QQ67;Q07020;G3V203;H0YHA7;F8VYV2;F8VUA6;A0A075B7A0;F8VXR6	60S ribosomal protein L18	RPL18
26.6395	26.6246	26.4833	26.6581	26.6373	26.7487			0.752504	0.0989005	P50213;H0YL72;H0YLI6;H0YMU3;H0YKD0;H0YM64;H0YM46;H0YNF5	Isocitrate dehydrogenase [NAD] subunit alpha, mitochondrial	IDH3A
25.8637	26.1953	25.8188	25.7823	26.0289	25.9817			0.0703525	-0.0282993	P26196;Q8IV96	Probable ATP-dependent RNA helicase DDX6	DDX6
27.3173	27.3273	26.8742	27.5061	26.9883	27.2709			0.144228	0.0821667	P31930	Cytochrome b-c1 complex subunit 1, mitochondrial	UQCRC1
26.0259	25.8552	25.9817	25.6287	25.8324	25.9357			0.680984	-0.155334	P04040	Catalase	CAT
25.5727	25.9736	25.8983	25.5579	26.2751	25.9483			0.176697	0.112233	Q92887;Q5TCZ5;O15440	Canalicular multispecific organic anion transporter 1	ABCC2
26.3459	26.1998	26.1445	26.397	26.5138	26.1405			0.406699	0.120366	B1AK87;B1AK88		CAPZB
26.6091	25.8251	25.7876	26.1068	26.0614	25.9519			0.0425212	-0.0338999	Q9Y617	Phosphoserine aminotransferase	PSAT1
26.6869	26.8831	26.7375	26.641	26.7433	26.8558			0.0938458	-0.022466	G3V5Z7;P60900;G3V295;G3V3I1;G3V3U4;G3V4S5;G3V2S7;H0YJC4	Proteasome subunit alpha type;Proteasome subunit alpha type-6	PSMA6
25.1661	25.3394	25.047	25.0166	24.9993	25.3475			0.168019	-0.0630334	B7Z7P8;P62495;D6RCB3;D6RJE8;I3L492	Eukaryotic peptide chain release factor subunit 1	ETF1
27.8277	28.146	28.1534	28.3188	28.4105	28.2748			1.19944	0.292333	P23528;G3V1A4;E9PP50;E9PK25;E9PLJ3;E9PS23;E9PQB7;Q9Y281	Cofilin-1	CFL1
27.4656	27.9331	27.7262	27.8109	27.8848	27.7938			0.368	0.121534	P46777;Q5T7N0	60S ribosomal protein L5	RPL5
26.0421	25.3601	25.2129	25.6878	25.3507	25.7425			0.068164	0.0552998	Q13011;M0R248;M0QZW4	Delta(3,5)-Delta(2,4)-dienoyl-CoA isomerase, mitochondrial	ECH1
25.4973	25.569	25.3872	25.491	25.5404	25.4378			0.0290311	0.00523313	P22059;H0YCV6;H7C1R2;H7C368;H7C428;A0A0A0MSB4;Q6ZN50;Q969R2	Oxysterol-binding protein 1	OSBP
26.6267	26.6786	26.9861	26.971	27.2745	27.1826			1.23816	0.378901	P32969;D6RAN4;H0Y9V9;E7ESE0;H0Y9R4	60S ribosomal protein L9	RPL9
26.0244	26.2982	26.408	26.0523	26.4753	26.0961			0.0707871	-0.0356344	P38919;I3L3H2;J3QL52;J3QQP0;E9PBH4;F8WE11	Eukaryotic initiation factor 4A-III;Eukaryotic initiation factor 4A-III, N-terminally processed	EIF4A3
24.8095	25.0818	25.3103	24.9275	25.3039	26.1099			0.430274	0.379899	Q8IX12;A0A0C4DGG8;F5H1H2;F5H2E6;F5H3E1;H0YFJ7	Cell division cycle and apoptosis regulator protein 1	CCAR1
25.8277	26.066	26.1624	26.1089	26.1483	26.0044			0.25061	0.0685005	P11387;E5RIC7;Q969P6;E5RJ95;E5RFS0;E5RJ33;H0YBR3;H0YC03;E5RGE7;E5RGR4;E5RFE3;E5RGR2	DNA topoisomerase 1	TOP1
28.8183	29.5184	29.415	29.0385	29.1361	29.3058			0.144936	-0.0904338	P06748;E5RGW4	Nucleophosmin	NPM1
26.5677	26.613	26.5742	26.324	26.6807	26.8006			0.0396985	0.0167999	Q8NBS9	Thioredoxin domain-containing protein 5	TXNDC5
29.2927	29.6071	29.2227	30.1312	29.6157	29.634			0.952423	0.419467	P07737;K7EJ44;CON__P02584;I3L3D5	Profilin-1	PFN1
27.9973	28.3438	28.1724	28.0181	28.3712	28.2941			0.143302	0.0566343	F8VVM2;Q00325;F8VZL5;F8VWR4;F8VWQ0	Phosphate carrier protein, mitochondrial	SLC25A3
27.4474	27.5468	27.3041	27.7402	27.8439	27.7988			2.03802	0.361533	Q99805	Transmembrane 9 superfamily member 2	TM9SF2
25.2209	24.8493	24.8538	25.9679	25.3263	25.2939			1.03523	0.5547	P55084;F5GZQ3;B5MD38;C9JEY0;C9JE81;C9K0M0	Trifunctional enzyme subunit beta, mitochondrial;3-ketoacyl-CoA thiolase	HADHB
25.6904	25.6285	26.53	25.8148	25.9072	26.0047			0.0471366	-0.0407333	Q96RP9;C9IZ01;F8WAU4	Elongation factor G, mitochondrial	GFM1
25.3065	24.7594	24.9206	25.1571	24.9645	24.7043			0.0913981	-0.0535329	E7EVA0;P27816;H7C4C5;B5MEG9;H0Y2V1;F8W9U4	Microtubule-associated protein;Microtubule-associated protein 4	MAP4
26.2479	26.7621	26.2101	25.9758	26.543	25.9223			0.414108	-0.259667	Q8NI27;A0A0C4DG98;H0Y815;B7ZBA0;H0Y594;H0Y7U4;F2Z2V2;B7ZB98;H7C477	THO complex subunit 2	THOC2
24.4583	24.9276	25.0524	24.6653	24.809	24.8767			0.0523433	-0.0291004	O15226;A0A087WXT2	NF-kappa-B-repressing factor	NKRF
27.4576	27.876	27.8595	27.9744	27.414	27.6433			0.0901004	-0.0538006	F8W6I7;P09651;F8VZ49;Q32P51;F8VYN5;F8VTQ5;F8W646;H0YH80	Heterogeneous nuclear ribonucleoprotein A1;Heterogeneous nuclear ribonucleoprotein A1, N-terminally processed;Heterogeneous nuclear ribonucleoprotein A1-like 2	HNRNPA1;HNRNPA1L2
27.5455	27.375	26.7948	27.5041	27.5287	27.5797			0.58441	0.299067	P37837;F2Z393;E9PM01;E9PKI8	Transaldolase	TALDO1
25.9018	25.8008	27.4203	26.2314	25.6571	25.7891			0.36458	-0.481766	Q6PKG0;A0A0B4J210;E5RH50;H0YC33;H0YC73;H0YBW1;Q659C4;H0YAN4;H0YAX9;E5RHK4	La-related protein 1	LARP1
25.8193	25.7417	25.7421	25.9971	25.9153	25.9019			1.9073	0.170401	O76094;D6RDY6;R4GNC1	Signal recognition particle subunit SRP72	SRP72
25.9328	26.3896	26.3565	26.4763	26.6472	26.2558			0.557619	0.233466	O15371;B0QYA5;B0QYA4;B0QYA8;B0QYA6	Eukaryotic translation initiation factor 3 subunit D	EIF3D
25.5214	25.9316	25.8568	25.4172	25.8472	25.7662			0.195889	-0.0930672	Q9BQ52;E7ES68;G5E9D5;H7C2I4;V9GYS7;V9GZ72	Zinc phosphodiesterase ELAC protein 2	ELAC2
26.1872	26.0738	25.9879	26.5228	26.2528	26.1357			0.794702	0.2208	Q14914;F2Z3J9;F6XGT7;Q5JVP2	Prostaglandin reductase 1	PTGR1
25.1846	25.1749	25.3711	25.6757	25.3829	25.2874			0.702919	0.205133	P62195;J3QSA9;J3QQM1;J3QLH6;J3KRP2;J3QSE0;J3QRW1;J3QRR3;J3KTQ9	26S protease regulatory subunit 8	PSMC5
26.8421	26.5886	26.6344	27.1732	26.9115	26.9624			1.36741	0.327334	Q16658;C9JPH9;C9JFC0;A0A0A0MSB2	Fascin	FSCN1
27.5076	27.4603	27.444	27.7029	27.5594	27.5659			1.28767	0.138767	Q99460;H7BZR6;C9J9M4;H7C378;F8WCE3	26S proteasome non-ATPase regulatory subunit 1	PSMD1
25.5968	24.714	25.7576	25.644	26.0133	25.8322			0.624033	0.473699	P55884;C9JZG1;C9JQN7	Eukaryotic translation initiation factor 3 subunit B	EIF3B
27.632	27.3892	27.3613	27.2766	27.6143	27.5489			0.0487041	0.0191002	P30153;B3KQV6;C9J9C1;E9PH38;M0QXG4;M0R0K6	Serine/threonine-protein phosphatase 2A 65 kDa regulatory subunit A alpha isoform	PPP2R1A
25.8554	25.4816	25.6399	25.4907	25.2507	25.3557			1.07117	-0.293267	Q96KR1;H0Y8W1	Zinc finger RNA-binding protein	ZFR
27.2284	27.1344	27.4391	27.2641	27.5566	26.7438			0.112885	-0.0791334	P11388;J3KTB7	DNA topoisomerase 2-alpha	TOP2A
28.2758	28.1808	28.314	28.3007	28.4455	28.4587			1.0586	0.144766	P63104;E7EX29;B0AZS6;E7ESK7;B7Z2E6;H0YB80;E9PD24;E7EVZ2;E5RGE1;E5RIR4	14-3-3 protein zeta/delta	YWHAZ
25.5822	25.9014	25.935	25.5253	26.0153	25.6476			0.155068	-0.0767994	O95347;Q5T821;A0A0C4DGE5	Structural maintenance of chromosomes protein 2	SMC2
26.9247	26.8529	26.94	26.9839	26.803	26.8169			0.232551	-0.0379333	Q15046;H3BVA8;J3KRL2;H3BPV7	Lysine--tRNA ligase	KARS
24.8902	25.5214	25.7894	25.3117	25.0316	25.7153			0.0489925	-0.0474663	O00411;K7EMH3;K7ESD1	DNA-directed RNA polymerase, mitochondrial	POLRMT
26.3489	26.6513	26.4715	26.7069	26.6818	26.8634			1.16947	0.260133	P13804;H0YL12;H0YLU7;H0YK49;H0YNX6;H0YKF0;J3KN60;H0YL83	Electron transfer flavoprotein subunit alpha, mitochondrial	ETFA
25.4832	25.7426	25.8734	25.7274	25.7258	25.8455			0.212718	0.0665003	Q53EP0	Fibronectin type III domain-containing protein 3B	FNDC3B
26.3631	26.5648	26.5097	26.4937	26.4692	26.4594			0.0280601	-0.00510025	A0A087WY71;E9PFW3;Q96CW1;C9JJ47;H7C4C3;C9JJD3;C9JPV8;C9JTK4;C9JGT8	AP-2 complex subunit mu	AP2M1
27.1491	27.2674	27.3861	27.2517	27.3498	27.3141			0.194954	0.0376663	Q96AG4;I3L223	Leucine-rich repeat-containing protein 59	LRRC59
26.5803	26.6123	26.7613	26.8792	27.0379	26.9014			1.74152	0.2882	Q9NSD9	Phenylalanine--tRNA ligase beta subunit	FARSB
26.7762	26.64	26.7914	26.8429	26.928	26.7415			0.63361	0.1016	A0A0A0MSQ0;P13797;U3KQI3;H7C4N2;Q14651	Plastin-3	PLS3
26.4557	26.9374	26.47	26.0923	26.8517	27.1195			0.0673765	0.0667998	Q5T3Q7;Q9H583;Q6P664	HEAT repeat-containing protein 1;HEAT repeat-containing protein 1, N-terminally processed	HEATR1
25.6441	25.5886	25.9155	25.6229	25.5653	25.4191			0.697543	-0.1803	Q27J81;A0A0A0MQU1	Inverted formin-2	INF2
26.8454	26.6155	27.1989	27.2417	27.1248	26.9222			0.46865	0.209633	Q09161;X6R941;F2Z2T1	Nuclear cap-binding protein subunit 1	NCBP1
25.5332	26.0239	25.7553	26.1476	25.6258	25.6545			0.0604218	0.0384998	O00429;B4DPZ9;F8VZ52;F8W1W3;B4DDQ3	Dynamin-1-like protein	DNM1L
26.4061	26.4925	26.5749	26.317	26.606	26.6495			0.103098	0.0330003	P46063;F8WA66;F8WD97;F5H4P4;F5H3W0	ATP-dependent DNA helicase Q1	RECQL
26.6657	26.7004	26.4276	26.8229	26.6554	26.5468			0.261783	0.0771332	P00367	Glutamate dehydrogenase 1, mitochondrial	GLUD1
26.4796	25.7875	26.2787	26.475	25.3144	26.4737			0.0756472	-0.0942338	A0A0G2JH68;O60610;B4E2I7	Protein diaphanous homolog 1	DIAPH1
24.7331	25.4047	25.0917	24.5576	25.1753	25.2479			0.101834	-0.0828997	O15230	Laminin subunit alpha-5	LAMA5
24.9705	25.2568	25.3475	25.2649	25.2525	25.4554			0.432748	0.132667	Q8NE71;H0YGW7;A0A0G2JIC2;Q5STZ8;F5GYK6	ATP-binding cassette sub-family F member 1	ABCF1
27.1546	27.3712	26.7021	26.0315	26.3187	27.4885			0.402605	-0.463067	P12955;K7ES25;V9GYL0;V9GYE4;V9GY89	Xaa-Pro dipeptidase	PEPD
27.442	27.2411	27.3868	27.6709	27.528	27.4286			0.940936	0.185867	P27348;E9PG15	14-3-3 protein theta	YWHAQ
27.6906	28.2485	28.2618	27.7901	28.0922	28.1157			0.11392	-0.0676339	P12004	Proliferating cell nuclear antigen	PCNA
26.1636	26.1875	26.1854	26.0343	26.3616	26.5892			0.391283	0.149533	P12081;B4DDD8;B3KWE1;E7ETE2;B4E1C5;D6RF05	Histidine--tRNA ligase, cytoplasmic	HARS
25.3623	25.6872	25.3672	26.5394	26.7169	26.419			2.85147	1.0862	O15118;K7EQ23	Niemann-Pick C1 protein	NPC1
24.4986	24.8424	24.7384	25.5327	24.7611	25.3833			0.969738	0.532567	C9JZR2;O60716;H0YC95;E9PRE2	Catenin delta-1	CTNND1
25.8739	25.8731	26.1749	26.128	25.9797	26.1212			0.386551	0.102334	O15344;C9J453;A0A087X255;A0A087X0X0;C9JZJ7	E3 ubiquitin-protein ligase Midline-1	MID1
26.2126	26.2045	26.5507	26.5267	26.4068	26.2738			0.23115	0.0798327	O95831;E9PMA0;E9PRR0;E9PMQ8	Apoptosis-inducing factor 1, mitochondrial	AIFM1
27.2529	27.5494	27.2481	27.2171	27.2159	27.1833			0.652829	-0.1447	P09622;E9PEX6;F8WDM5;F2Z2E3	Dihydrolipoyl dehydrogenase, mitochondrial;Dihydrolipoyl dehydrogenase	DLD
25.7579	26.0355	25.9685	26.0121	26.0372	25.9245			0.320579	0.0706336	P17812;Q9NRF8	CTP synthase 1	CTPS1
26.8215	26.7783	26.7744	26.93	27.0451	26.6765			0.34914	0.0924664	B0QY89;Q9Y262;B0QY90;C9JHP4;C9K0Q7;H7C3A0	Eukaryotic translation initiation factor 3 subunit L	EIF3L
26.2131	26.4216	26.2008	26.0421	26.3582	26.4098			0.0208381	-0.00846672	Q9NZ01;M0R3C3;M0QXM3;M0R329;B4DR74	Very-long-chain enoyl-CoA reductase	TECR
28.3402	28.5553	28.3245	28.4118	28.4689	28.7306			0.456688	0.130434	Q9P035;H3BPZ1;H3BS72;H3BRL8;H3BMZ1	Very-long-chain (3R)-3-hydroxyacyl-CoA dehydratase 3	HACD3
27.5191	27.9676	27.7636	27.7251	28.0382	27.7534			0.210166	0.0888004	Q15365	Poly(rC)-binding protein 1	PCBP1
25.4884	25.9602	25.9604	25.5917	26.1111	25.8852			0.0982643	0.059667	F5H365;Q15436;G3V4V1;G3V1W4;G3V3G5;G3V2R6;G3V5X8;G3V4Q2;G3V5K1	Protein transport protein Sec23A	SEC23A
25.4388	25.4606	25.7378	25.361	25.4371	25.5017			0.465585	-0.112467	O75534;E9PLT0;E9PNG3;E9PJK7;E9PLD4	Cold shock domain-containing protein E1	CSDE1
26.066	26.1343	25.9636	25.9716	25.9745	25.9023			0.892535	-0.105167	Q00796;H0YLA4;H0YKB3	Sorbitol dehydrogenase	SORD
25.771	26.6148	26.3539	25.4763	25.7076	26.4273			0.422549	-0.376167	P35573	Glycogen debranching enzyme;4-alpha-glucanotransferase;Amylo-alpha-1,6-glucosidase	AGL
28.4505	28.6008	28.4584	28.4127	28.893	28.3488			0.0967549	0.0482667	X1WI28;P27635;A0A087WV22;H7C123;B8A6G2;H7C2C5;A6QRI9;Q96L21;H7C2U2	60S ribosomal protein L10	RPL10
25.8122	26.0637	25.9342	25.5986	25.7104	25.7496			1.36758	-0.2505	Q9UKK3	Poly [ADP-ribose] polymerase 4	PARP4
26.3308	26.7317	26.7753	26.1204	26.6123	26.4715			0.446215	-0.211199	Q9UBT2;K7EPL2;K7ESK7;U3KQ93;U3KQ55;K7ES38	SUMO-activating enzyme subunit 2	UBA2
25.2932	25.2848	25.2462	25.1846	25.4523	25.5833			0.485834	0.132	P08237;F8VP00;H0YHB8;F8W1J8;F8VSF7;F8VW30;F8VSL1;F8VUB8;F8VTQ3;F8VYK8;F8VZI0;F8VX13;F8VNX2;F8VZQ1;F8VVE3	ATP-dependent 6-phosphofructokinase, muscle type	PFKM
26.2185	25.9664	25.9674	26.2331	26.2019	26.1199			0.673939	0.1342	P35998;C9JLS9	26S protease regulatory subunit 7	PSMC2
26.6299	26.8049	26.6656	26.6532	26.3188	26.1411			0.967477	-0.3291	D6REX3;O94979;H7BXG7;D6RHZ5;H0YAB3;H0Y9K1;H0Y8V7;H0Y8W8;H0YAF5;H0Y9T9;D6RE64;D6RCQ9;H0Y9V3	Protein transport protein Sec31A	SEC31A
26.486	26.702	26.5646	26.4655	26.551	26.6047			0.228685	-0.0437997	C9J2Y9;P30876;C9J4M6	DNA-directed RNA polymerase;DNA-directed RNA polymerase II subunit RPB2	POLR2B
26.7118	27.1177	26.8257	27.1912	27.0548	27.4348			0.975558	0.341866	P16152;E9PQ63;A8MTM1;O75828	Carbonyl reductase [NADPH] 1	CBR1
27.0953	27.0366	27.3204	27.0594	27.4176	27.0644			0.0708304	0.0297	Q9UQ80;F8VR77;H0YIN7;F8W0A3	Proliferation-associated protein 2G4	PA2G4
24.9988	26.8317	25.8527	25.9846	27.1327	26.1285			0.335351	0.520867	Q14566	DNA replication licensing factor MCM6	MCM6
26.1895	26.2675	26.1124	26.0824	26.6259	26.4569			0.523737	0.198599	P49748;G3V1M7;J3QRJ8;J3KSR4;K7EQP4;J3KS89;K7EJW8;K7EMF8;J3QKU9	Very long-chain specific acyl-CoA dehydrogenase, mitochondrial	ACADVL
27.1274	24.9031	25.6538	26.8214	25.5788	25.6451			0.054004	0.120334	H3BPE1;H3BQK9;Q9UPN3;H0Y390;E9PNZ4;E9PLY5;H0Y314;H0Y4F5;H0Y6T5;E9PLY0;H0YD69;H0Y7I1;E9PS75;H0YC65	Microtubule-actin cross-linking factor 1, isoforms 1/2/3/5	MACF1
25.6807	26.1769	26.0063	25.5984	25.612	26.013			0.463234	-0.2135	A0A0G2JN29;A0A087X117;Q15155;A0A0G2JP90;A0A087WW46;H3BUC9	Nodal modulator 1	NOMO1
25.9725	26.0912	25.9925	26.1361	26.5381	26.1458			0.861642	0.2546	Q6PI48	Aspartate--tRNA ligase, mitochondrial	DARS2
25.3835	25.274	25.2484	25.1837	25.009	24.9659			1.47293	-0.249099	Q9Y5S2;H0YLY0	Serine/threonine-protein kinase MRCK beta	CDC42BPB
25.4537	25.9258	25.6905	25.7055	25.4875	25.8504			0.0170814	-0.00886663	Q9BR76;A0A087WW53;F5H390;F5H0D2;A9Z1Z3	Coronin-1B	CORO1B
26.7724	26.75	26.3234	27.0559	26.9375	27.0505			1.2412	0.399367	O00116;B8ZZ81	Alkyldihydroxyacetonephosphate synthase, peroxisomal	AGPS
26.612	25.9309	26.3695	26.4216	25.7938	26.1596			0.265006	-0.179133	O75116;E9PF63;Q14DU5;D6REE7;C9JFJ0	Rho-associated protein kinase 2	ROCK2
26.2574	26.5505	26.2847	26.5056	26.2115	26.4228			0.0419278	0.0157661	Q9BYT8;E9PCB6;H0YAK4;H0YAF7	Neurolysin, mitochondrial	NLN
27.9676	28.2118	27.8618	27.9313	28.0674	28.3227			0.237815	0.0934003	Q32Q12;P22392;J3KPD9;F6XY72	Nucleoside diphosphate kinase;Nucleoside diphosphate kinase B	NME1-NME2;NME2
26.4461	27.0796	26.5256	26.3121	26.911	27.0662			0.0930477	0.079333	P28288	ATP-binding cassette sub-family D member 3	ABCD3
28.8255	28.7867	29.3964	29.3386	29.3248	29.2207			0.658855	0.291833	P09211;A8MX94;A0A087X2E9;A0A087X243	Glutathione S-transferase P	GSTP1
27.9159	28.2922	28.3644	28.2345	28.2971	28.2824			0.22411	0.0805003	P62136;E9PMD7;F5H1L6;F5H037	Serine/threonine-protein phosphatase PP1-alpha catalytic subunit;Serine/threonine-protein phosphatase	PPP1CA
26.5766	26.3166	26.3036	26.4019	26.4242	26.3901			0.0241762	0.00646655	P61221;D6R9I9;D6RGF4;H0Y990	ATP-binding cassette sub-family E member 1	ABCE1
26.461	26.7732	26.6745	26.5009	26.5026	26.3851			0.801307	-0.173367	Q14258	E3 ubiquitin/ISG15 ligase TRIM25	TRIM25
28.357	28.4654	28.578	28.356	28.741	28.4893			0.182	0.0619666	P18124;A8MUD9;C9JIJ5;C9JZ88	60S ribosomal protein L7	RPL7
27.9387	28.2901	28.2995	28.0744	28.4743	28.3874			0.329451	0.135934	A0A024R4M0;P46781;B5MCT8;C9JM19;F2Z3C0;A8MXK4	40S ribosomal protein S9	RPS9
28.278	28.4233	28.2736	28.464	28.3123	28.1775			0.0244454	-0.00703303	P00505	Aspartate aminotransferase, mitochondrial	GOT2
27.1891	27.1111	27.2013	27.5145	27.5191	27.4356			2.92693	0.322567	P61247;D6RG13;D6RAT0;D6RB09;H0Y9Y4;D6R9B6;H0Y8L7;E9PFI5;D6RAS7;D6RED7;D6RGE0;D6RI02	40S ribosomal protein S3a	RPS3A
26.1898	26.315	26.4163	26.1172	26.1575	26.5024			0.126856	-0.0480003	Q7L576;A0A0G2JR96;A0A0G2JQT1;A0A0G2JQH3;A0A087WVZ5;H0YL50;A0A0G2JRX2;A0A087WU52;A0A0G2JRV9;A0A087WWL1;A0A087WVE1;A0A087WTQ3;A0A087WWZ1	Cytoplasmic FMR1-interacting protein 1	CYFIP1
26.7094	26.8761	26.7724	26.7898	26.8565	26.8374			0.328742	0.0419337	Q9Y3I0	tRNA-splicing ligase RtcB homolog	RTCB
26.017	26.22	26.0822	26.6009	26.348	26.2061			1.00512	0.278601	J3QRD1;P51648;I3L1M4;J3QS00;J3QKK9;J3KTG1;C9JGJ2;I3L0X1;J3KTD9;I3L2W1;K7EN73	Fatty aldehyde dehydrogenase	ALDH3A2
26.0918	25.8706	25.7202	26.2719	25.8455	25.9941			0.361113	0.142967	Q92538	Golgi-specific brefeldin A-resistance guanine nucleotide exchange factor 1	GBF1
26.7234	26.7182	26.6087	27.0441	26.5664	26.7349			0.272306	0.0983664	Q01518;Q5T0R7;Q5T0R6;Q5T0R5;Q5T0R4;Q5T0R3;Q5T0R2;Q5T0R1;Q5T0R9;Q5T0R8;Q5T0S3;B7Z385;A0A087X0J3;A0A087WZ15;E9PDI2;P40123	Adenylyl cyclase-associated protein 1	CAP1
26.6759	27.2226	27.0413	26.7735	27.0534	26.9985			0.0734466	-0.038133	P25205;J3KQ69;Q7Z6P5	DNA replication licensing factor MCM3	MCM3
26.0534	26.0026	25.905	27.6544	27.2687	26.9769			2.54729	1.313	O75874;C9J4N6;C9JJE5;C9JLU6	Isocitrate dehydrogenase [NADP] cytoplasmic	IDH1
27.3835	27.1227	27.1046	27.5611	27.0646	27.1034			0.0756992	0.0394332	O75083;D6RD66	WD repeat-containing protein 1	WDR1
27.792	27.6218	27.722	27.8715	27.9706	28.011			1.68444	0.2391	Q92973;E7EW37;S4R398;K7ENW1;K7ESC1	Transportin-1	TNPO1
27.329	27.3955	27.3016	27.4452	27.4975	27.1154			0.0292055	0.0106665	P40925;B9A041;B8ZZ51;C9JF79;C9JLV6	Malate dehydrogenase, cytoplasmic;Malate dehydrogenase	MDH1
28.9797	29.0938	29.0723	29.3056	29.2143	29.0934			1.03477	0.155833	A0A0A0MTS2;P06744;K7EQ48;A0A0J9YXP8;A0A0J9YX90;A0A0J9YYH3;K7EPY4;K7EP41;K7ELR7;K7ENA0;K7EIL4;K7ERK8;K7ERC6;K7ESF4	Glucose-6-phosphate isomerase	GPI
25.8768	26.0477	25.7508	25.7597	25.7863	25.6863			0.74404	-0.147666	Q12797;E5RHJ2;E5RHK2;G3XAN5;E5RG29;A0A0A0MSK8;E5RG56	Aspartyl/asparaginyl beta-hydroxylase	ASPH
27.0427	26.5221	26.8381	26.2651	27.0266	26.1938			0.426061	-0.3058	G3V3M6;P27695;G3V5Q1;G3V3C7;A0A0C4DGK8;G3V5D9;G3V5M0;G3V359;H7C4A8;G3V3Y6;G3V2D9	DNA-(apurinic or apyrimidinic site) lyase;DNA-(apurinic or apyrimidinic site) lyase, mitochondrial	APEX1
26.6466	27.04	27.2067	26.5116	27.1932	26.9575			0.106952	-0.0770003	P49736;H0Y8E6;H7C4N9;C9J013;C9JZ21;F8WDM3	DNA replication licensing factor MCM2	MCM2
25.4708	25.6244	26.1593	25.8092	26.0352	26.6473			0.56158	0.412401	A5YKK6;H3BMZ2;B5MDN3;H3BNB1;H3BR89;H3BMH0;H3BVC9;H3BTH2;H3BT18;H3BU44	CCR4-NOT transcription complex subunit 1	CNOT1
25.5972	25.5077	25.3691	25.818	25.3904	25.3294			0.0433262	0.0212663	P36871	Phosphoglucomutase-1	PGM1
27.3719	27.3359	27.388	27.4376	27.3427	27.3985			0.366466	0.0276661	B4DJV2;O75390;A0A0C4DGI3;H0YIC4;F8VTT8;F8W4S1;H0YH82;F8VRP1;F8VX68;F8VPF9;F8VPA1;F8W1S4;F8W642;F8VZK9;F8VX07;F8VWQ5;F8VRI6;F8VU34;F8VR34;F8W0J2;F8VP03;F8W031	Citrate synthase;Citrate synthase, mitochondrial	CS
28.5282	28.6905	28.6668	28.5141	28.8377	28.6405			0.121567	0.0355994	P63244;J3KPE3;H0Y8W2;H0YAF8;H0YAM7;D6RAC2;D6REE5;D6RFX4;D6R9Z1;D6R9L0;H0Y8R5;H0Y9P0	Guanine nucleotide-binding protein subunit beta-2-like 1;Guanine nucleotide-binding protein subunit beta-2-like 1, N-terminally processed	GNB2L1
25.7281	25.7114	25.826	25.9095	25.6976	26.0049			0.519794	0.1155	Q9BXJ9;A0A0B4J1W3;Q6N069	N-alpha-acetyltransferase 15, NatA auxiliary subunit	NAA15
26.9277	27.1219	27.0978	27.1496	27.2167	27.1442			0.860316	0.121033	P30041	Peroxiredoxin-6	PRDX6
27.5396	27.4428	27.6238	27.7861	27.7749	27.6199			1.20199	0.191566	O00299	Chloride intracellular channel protein 1	CLIC1
28.4233	28.6116	28.7208	28.4264	28.7334	29.3694			0.370991	0.257833	Q02878;F8VZ45;U3KQR5;F8VR69;F8VZA3;F8VWR1;F8VU16	60S ribosomal protein L6	RPL6
27.1674	27.1899	26.9466	27.2221	27.2244	27.287			0.824468	0.1432	P09525;Q6P452;B4E1S2	Annexin A4;Annexin	ANXA4
26.7608	26.6737	26.5024	26.8971	26.7043	26.7867			0.731125	0.1504	Q96QK1;I3L4S0;I3L4P4	Vacuolar protein sorting-associated protein 35	VPS35
26.5756	27.078	27.1193	26.8453	27.2142	26.8837			0.0965731	0.0567665	Q02790;F5H120;H0YFG2	Peptidyl-prolyl cis-trans isomerase FKBP4;Peptidyl-prolyl cis-trans isomerase FKBP4, N-terminally processed	FKBP4
27.9172	27.7939	27.8016	27.8148	27.7613	28.1863			0.234493	0.0832335	H0Y4R1;P12268;E7ETK5	Inosine-5-monophosphate dehydrogenase 2	IMPDH2
27.4472	26.9374	26.8833	26.5133	26.6966	26.8127			0.974148	-0.415101	P14923;C9JTX4;C9J826;C9JK18;C9JKY1;C9JPI2;K7ERP3	Junction plakoglobin	JUP
28	28.3186	28.1643	28.1563	28.2055	28.3083			0.240437	0.0623995	O95373;E9PLB2;E9PLJ0	Importin-7	IPO7
27.1856	27.6495	27.4631	27.6476	27.8164	27.9791			1.08544	0.381633	P48643;E7ENZ3;B7ZAR1;E9PCA1;D6RIZ7;H0Y914	T-complex protein 1 subunit epsilon	CCT5
27.305	27.3485	27.6829	27.2435	27.4447	27.4749			0.154583	-0.0577666	J3KTA4;P17844;J3QRQ7;J3KRZ1;J3QSF1;J3KRX8;J3QR02;X6RLV5;J3QRN5	Probable ATP-dependent RNA helicase DDX5	DDX5
26.259	26.4725	26.0889	25.9746	26.0997	26.3286			0.385883	-0.139167	Q12965;H0YNQ8;H0YLE5;O00160;H0YN00;M0QXU2	Unconventional myosin-Ie	MYO1E
31.0617	31.305	31.2404	30.889	31.3457	31.1205			0.216918	-0.0839672	Q04828;A0A0A0MT30;H0Y804;A6NHU4;P17516	Aldo-keto reductase family 1 member C1	AKR1C1
27.3065	27.5599	27.5408	27.3879	27.526	27.4621			0.0389364	-0.0104008	E7ERJ7;P11940;E7EQV3;A0A087WTT1;H0YAR2;H0YBN4;Q9H361;H0YAP2;H0YB86;H0YAS6;H0YB75;E5RH24;E5RJB9;E5RHG7;E5RGH3;H0YEQ8;H0YAS7;Q4VXU2;H0YC10;E5RGC4;E5RFD8;H0YAW6;Q5JQF8	Polyadenylate-binding protein;Polyadenylate-binding protein 1	PABPC1
27.3241	27.3626	27.2104	27.6186	27.709	27.4467			1.51079	0.2924	O14975;G3V1R7	Very long-chain acyl-CoA synthetase	SLC27A2
28.3976	28.5413	28.3463	28.4417	28.4458	28.6515			0.394547	0.0846004	P40227;J3KRI6	T-complex protein 1 subunit zeta	CCT6A
28.7936	28.9701	28.8512	29.0262	29.0444	29.0816			1.51914	0.179099	Q06830;A0A0A0MSI0;A0A0A0MRQ5	Peroxiredoxin-1	PRDX1
27.2628	27.7374	27.7407	27.215	27.7683	27.7583			0.000314033	0.000233332	Q15233;H7C367;C9JYS8;C9IZL7;C9J4X2	Non-POU domain-containing octamer-binding protein	NONO
28.549	28.9368	28.7416	28.6716	28.7554	28.61			0.204956	-0.0634664	P22626;A0A087WUI2	Heterogeneous nuclear ribonucleoproteins A2/B1	HNRNPA2B1
27.5557	28.7311	27.8785	27.8963	27.8837	28.6253			0.065117	0.0799993	P61313;E7EQV9;E7ENU7;E7EX53;E7ERA2	60S ribosomal protein L15;Ribosomal protein L15	RPL15
28.9873	29.3282	29.2614	29.0474	29.365	29.3263			0.1379	0.0539328	P62241;Q5JR95	40S ribosomal protein S8	RPS8
27.5436	27.8156	27.7704	27.5307	27.795	27.7879			0.0145911	-0.00533231	P62280;M0QZC5;M0R1H5;M0R1H6	40S ribosomal protein S11	RPS11
27.6655	27.6391	27.7531	27.6361	27.9114	27.8828			0.590659	0.1242	P21796;C9JI87	Voltage-dependent anion-selective channel protein 1	VDAC1
27.2476	27.7755	27.4486	27.4743	27.5902	27.521			0.0854019	0.0379333	P27824;D6RGY2;H0Y9Q7;D6RFL1;D6RB85;D6RDP7;H0Y9H1;D6RHJ3;D6RD16;D6RAQ8;D6RAU8	Calnexin	CANX
26.4712	27.0194	26.8338	26.5787	26.8578	26.6836			0.139688	-0.0681006	Q9BZE4;Q5T3R7	Nucleolar GTP-binding protein 1	GTPBP4
28.7474	28.787	28.9191	28.9183	29.1064	29.1028			1.30065	0.224667	P60842;J3KT12;J3QS69;J3QL43;J3KSZ0;J3KTN0	Eukaryotic initiation factor 4A-I	EIF4A1
27.2783	26.3218	27.3021	26.5576	26.879	26.5514			0.375291	-0.304733	A0A024R4E5;Q00341;H0Y394;H7C0A4;C9JIZ1;H7BZC3;C9JZI8;C9J5E5;C9JHS7;C9JHZ8;C9JES8;H7C2D1;C9JBS3;C9JEJ8;A0A0U1RVI6;C9JHN6;C9JT62;C9JK79;C9JMQ6;C9JQ82	Vigilin	HDLBP
26.9811	27.1084	26.9683	27.0635	26.9649	26.8463			0.325318	-0.0610339	P34897;H0YIZ0;G3V2Y4;G3V5L0;G3V4W5;G3V2W0;G3V540;G3V241;G3V3Y8;G3V4T0;G3V4X0;G3V2E4;G3V2Y1;G3V3C6	Serine hydroxymethyltransferase, mitochondrial;Serine hydroxymethyltransferase	SHMT2
26.2492	26.1466	26.3682	26.3779	26.0644	26.1674			0.17346	-0.0514342	A0A0G2JMG8;A0A0G2JLX3;J3KN39;A0A0G2JPQ2;Q9NX02;A0A0G2JP37;A0A0G2JNC8;A0A0G2JPB6;A0A0G2JLQ8;A0A0G2JM25;A0A0G2JNK1;K7ERG0;A0A0G2JMB6;A0A0G2JPH3;A0A0G2JNK3;Q8WX94;K7EMK2;K7EPE6;K7ELX1;F5H5B1;F5GYZ4	NACHT, LRR and PYD domains-containing protein 2	NLRP2
25.5923	26.2113	26.2871	25.9899	26.0988	26.0686			0.0337166	0.0222003	Q9NTJ3;E9PD53;C9JR83;C9J578;C9JVD8;C9J9E4;C9JWF0;C9IYK2;C9JJ64	Structural maintenance of chromosomes protein 4;Structural maintenance of chromosomes protein	SMC4
27.6923	27.9991	27.8683	27.7546	28.0019	28.0129			0.222682	0.0698999	P41091;Q2VIR3;F8W810;H7BZU1	Eukaryotic translation initiation factor 2 subunit 3;Putative eukaryotic translation initiation factor 2 subunit 3-like protein	EIF2S3;EIF2S3L
26.9311	26.5819	26.6514	27.1338	26.7591	26.4312			0.0820617	0.0532335	P35658;A0A0A0MSW3;H0Y837;B7ZAV2;E9PKD2;H0YF36;H0YDS4	Nuclear pore complex protein Nup214	NUP214
26.3439	26.322	27.0107	26.1332	26.462	26.3072			0.453621	-0.258067	E9PEB5;Q96AE4;C9JSZ1	Far upstream element-binding protein 1	FUBP1
28.4767	28.9013	28.9494	28.5212	29.0024	28.9101			0.0582527	0.0354335	O43143	Pre-mRNA-splicing factor ATP-dependent RNA helicase DHX15	DHX15
26.8496	26.8505	26.896	26.9644	26.9067	26.8496			0.496478	0.0415332	P07384;E9PLX0;E9PJJ3;E9PLC9;E9PMC6;E9PJA6;E9PSA6;E9PQB3;E9PRM1;E9PIA9;E9PL37	Calpain-1 catalytic subunit	CAPN1
25.4745	25.6036	25.8412	25.5421	25.7963	26.7811			0.436491	0.400067	P20020;E7ERY9;A0A0U1RQU3;H0Y7S3;Q16720;Q01814;H0YHH6	Plasma membrane calcium-transporting ATPase 1;Calcium-transporting ATPase	ATP2B1
26.5328	26.7708	26.7749	26.775	26.7339	26.8258			0.433614	0.0853996	Q8N163;H0YB24;G3V119;E5RHJ4;A0A087X2B6;H0YC69;E5RFJ3;H0YC58;E5RGU7	Cell cycle and apoptosis regulator protein 2	CCAR2
26.9459	27.0059	27.0264	26.9845	27.1911	27.0992			0.699296	0.0988668	Q13838;Q5STU3;F6WLT2;A0A0G2JJZ9;F6S4E6;A0A0A0MT12;F6TRA5;F6UJC5;F6R6M7;A0A0G2JHN7;F6U6E2;F6S2B7;H0Y400;F6QYI9;A0A0G2JJL7;F6SXL5;H0YCC6	Spliceosome RNA helicase DDX39B	DDX39B
26.9528	27.6699	27.6069	27.0782	27.6165	27.6511			0.0448706	0.0387332	P23921;E9PL69;E9PP77;H0YCY7	Ribonucleoside-diphosphate reductase large subunit	RRM1
26.9677	27.3075	27.0844	26.9398	27.1716	27.2359			0.0100603	-0.00409953	Q9Y265;E7ETR0;H7C4G5;J3QLR1;H7C4I3	RuvB-like 1	RUVBL1
29.7356	29.8115	29.8747	29.8892	29.9995	29.9506			1.27181	0.139167	P60174;U3KPZ0;U3KQF3;U3KPS5	Triosephosphate isomerase	TPI1
27.4512	25.8036	26.2004	27.3347	25.8924	25.9987			0.0381844	-0.0764669	Q86UP2;G3V4Y7;B7Z6P3;H0YJP2;G3V5G2;H0YJV5;H0YJZ8	Kinectin	KTN1
26.3985	27.0245	27.13	26.1894	26.748	26.6259			0.507901	-0.3299	P33991;E5RG31;E5RFJ8	DNA replication licensing factor MCM4	MCM4
26.9615	27.4828	27.4748	26.9484	27.621	27.1674			0.0817772	-0.0607662	P33993;C9J8M6	DNA replication licensing factor MCM7	MCM7
25.6133	26.3213	25.9819	26.0306	26.2221	26.15			0.312415	0.162066	H3BQZ7;Q1KMD3	Heterogeneous nuclear ribonucleoprotein U-like protein 2	HNRNPUL2-BSCL2;HNRNPUL2
28.4191	28.4071	28.4839	28.5132	28.55	28.4703			1.05533	0.0744667	P26641	Elongation factor 1-gamma	EEF1G
27.9094	28.2093	28.2097	28.2992	28.4104	28.3834			1.13623	0.254867	P62424;Q5T8U3;Q5T8U2	60S ribosomal protein L7a	RPL7A
27.0488	27.1251	26.7844	26.9708	27.1131	27.01			0.151066	0.0452003	P49589;B4DKY1;C9JLN0;E9PRS8	Cysteine--tRNA ligase, cytoplasmic	CARS
26.6854	26.8437	26.7066	26.7011	26.7294	26.9045			0.153289	0.0330995	E9PF10;O75694;D6RA13	Nuclear pore complex protein Nup155	NUP155
27.6256	27.7784	27.7433	27.9647	27.8411	27.9543			1.54706	0.204267	P13489;E9PIM9;E9PMJ3;E9PLZ3;H0YCR7;E9PMN0;E9PIK5;E9PMA9;E9PR82;E9PMI1	Ribonuclease inhibitor	RNH1
27.2937	27.1464	27.4692	27.7439	27.4757	27.5443			1.08715	0.284867	A0A087X0X3;P52272;M0QZM1;M0R019;M0R2T0;M0R2I7;M0R0N3;M0QY96;M0QYQ7;M0R0Y6;M0QYL3	Heterogeneous nuclear ribonucleoprotein M	HNRNPM
28.5566	28.6727	28.6942	28.4726	28.6088	28.6481			0.401379	-0.0646667	P00390;E5RI06;H0YC68	Glutathione reductase, mitochondrial	GSR
26.5534	26.8938	26.6734	27.3151	27.4034	26.8411			1.12205	0.479666	Q92900	Regulator of nonsense transcripts 1	UPF1
27.8913	27.8944	28.192	27.8844	28.276	28.252			0.377085	0.1449	E9PKG1;H7C2I1;Q99873;E9PQ98;E9PIX6;E9PNR9;H0YDE4;Q9NR22;E9PMW9	Protein arginine N-methyltransferase 1	PRMT1
26.8967	27.5298	26.9841	27.2077	27.6808	27.5364			0.627482	0.3381	Q9Y5B9;G3V5A4;G3V401;G3V2X0	FACT complex subunit SPT16	SUPT16H
26.0889	26.4252	26.182	26.3391	25.9721	26.4825			0.0620478	0.0325336	A0A0C4DH22;Q4VXN0;Q4VXN6;Q4VXN5;Q4VXN1;Q4VXN8;Q4VXN7;H0Y482		EPB41L1
27.5198	27.4649	27.4559	27.4898	27.4672	27.4533			0.168509	-0.0101	P04843;B7Z4L4;F8WF32	Dolichyl-diphosphooligosaccharide--protein glycosyltransferase subunit 1	RPN1
27.6828	27.5728	27.4692	27.8755	27.0556	27.8238			0.0121717	0.0100327	P09960;B4DEH5	Leukotriene A-4 hydrolase	LTA4H
26.3416	25.9358	25.8754	25.7151	26.4226	26.4651			0.203994	0.149999	Q14573	Inositol 1,4,5-trisphosphate receptor type 3	ITPR3
27.1502	27.2357	27.1277	27.0458	27.1084	27.0503			1.25353	-0.103034	P55265;H0YCK3	Double-stranded RNA-specific adenosine deaminase	ADAR
26.918	27.1329	26.7967	27.0753	26.9069	26.9344			0.0724531	0.0230007	P35606;D6RBZ7;D6RCL6;D6RBG7;D6RBT6;D6R997;H0YAC7;H0Y938	Coatomer subunit beta	COPB2
28.1087	28.2142	28.1545	28.4167	28.2946	28.3562			1.86949	0.1967	P62258;B4DJF2;I3L3T1;K7EM20;K7EIT4;I3L0W5	14-3-3 protein epsilon	YWHAE
27.8648	28.0731	28.2102	28.297	28.1704	27.9954			0.323452	0.104901	O43390;B4DT28	Heterogeneous nuclear ribonucleoprotein R	HNRNPR
26.6819	26.3556	26.6376	26.5573	26.4899	26.4576			0.20642	-0.0567665	Q9UHD8;K7EL40;K7EK18;K7ER52;K7EIE4;K7EQD7;K7ELJ9;K7EJ51;K7EJZ2;K7EJL9;K7EIR4;K7EKN4;K7EN52;K7ENQ5;K7ENL0;K7EJV0;K7EPY1;K7ERG1;K7EQ08;K7ER34	Septin-9	2009-09-01
26.2023	26.0823	26.1413	26.3914	25.9407	26.2403			0.131166	0.0488332	P51659;E7EWE5;E7ER27;G5E9S2;E7ET17;E7EPL9	Peroxisomal multifunctional enzyme type 2;(3R)-hydroxyacyl-CoA dehydrogenase;Enoyl-CoA hydratase 2	HSD17B4
25.3331	25.7499	25.6341	25.7215	25.8441	26.1082			0.880625	0.3189	E9PDF6;O43795;H7C2Y7;E7EQD9;C9JYW1;Q9UBC5;C9JUP5;A0A0U1RRI3;G3V342	Unconventional myosin-Ib	MYO1B
26.2047	26.4249	26.2838	25.9925	26.4886	26.4597			0.0175156	0.00913302	Q9Y6K5;F8VWK9;F8VS35	2-5-oligoadenylate synthase 3	OAS3
27.1868	27.6901	27.6547	27.0508	27.6038	27.752			0.0535547	-0.041666	P52701;A0A087WWJ1;F8WAX8;A0A087WYT6;C9JH55;C9J8Y8;C9J7Y7;U3KQ72;F8W7G9	DNA mismatch repair protein Msh6	MSH6
27.2699	27.7528	27.6823	27.3288	27.7137	27.3886			0.180647	-0.0913003	P19338;H7BY16;C9JYW2;C9JLB1;C9J1H7;C9JWL1	Nucleolin	NCL
28.4935	28.6359	28.9028	28.6625	28.752	28.9328			0.295908	0.105034	E9PCY7;G8JLB6;P31943;D6RIT2;D6RIU0;D6RBM0;D6RAM1;D6R9T0;D6RFM3;D6RDU3;D6RJ04;D6RIH9;E7EQJ0;E5RGV0;E7EN40;H0YB39;D6RDL0;H0YBG7;H0YBD7;E5RGH4;D6R9D3;D6RF17;H0YAQ2;E5RJ94	Heterogeneous nuclear ribonucleoprotein H;Heterogeneous nuclear ribonucleoprotein H, N-terminally processed	HNRNPH1
27.6458	27.4761	27.4241	27.4769	27.5378	27.4306			0.172144	-0.0335674	P28331;B4DJ81;F8WDL5;C9JPQ5	NADH-ubiquinone oxidoreductase 75 kDa subunit, mitochondrial	NDUFS1
28.1622	28.5316	28.4251	28.9038	28.9635	28.8219			1.9544	0.523432	P45880;A0A0A0MR02;Q5JSD2;A2A3S1	Voltage-dependent anion-selective channel protein 2	VDAC2
27.1255	27.3191	27.0715	27.4148	27.342	27.2986			1.02349	0.179766	Q13200;C9JPC0;H7C2Q3;H7C1H2;F8WBS8	26S proteasome non-ATPase regulatory subunit 2	PSMD2
27.9692	28.4218	28.2972	28.2917	28.3138	28.5415			0.414894	0.152934	P13010;C9JZ81	X-ray repair cross-complementing protein 5	XRCC5
28.4258	28.8933	28.8379	28.6796	28.7022	28.8049			0.021668	0.00989978	P49411;H3BNU3	Elongation factor Tu, mitochondrial	TUFM
27.4838	27.8512	27.5979	27.6271	27.6054	27.79			0.0859811	0.0298665	P54886	Delta-1-pyrroline-5-carboxylate synthase;Glutamate 5-kinase;Gamma-glutamyl phosphate reductase	ALDH18A1
26.924	27.063	27.2615	27.2231	27.3624	26.9457			0.236364	0.0942338	Q96HC4;H0Y8Y3;H0YBI4;A0A0D9SFR4;A0A0A0MSP3;H0Y929	PDZ and LIM domain protein 5	PDLIM5
28.3727	28.8737	28.6727	28.3314	28.8541	28.6923			0.0216361	-0.0137666	P23396;E9PL09;E9PPU1;H0YEU2;F2Z2S8;H0YCJ7;H0YF32;E9PQ96;E9PSF4;E9PJH4;E9PK82;E9PQX2;H0YES8	40S ribosomal protein S3	RPS3
28.5134	28.7174	28.518	28.596	28.8998	28.9578			0.832985	0.234934	P62701;C9JEH7;P22090;Q8TD47	40S ribosomal protein S4, X isoform	RPS4X
28.1026	28.3955	28.1614	27.8599	28.2136	28.1261			0.478983	-0.1533	O14744;G3V580;G3V5L5;G3V2L6;H0YJX6;C9JSX3;G3V2X6;H0YJ77;H0YJD3;G3V5T6;H7BZ44;G3V507;G3V2F5	Protein arginine N-methyltransferase 5;Protein arginine N-methyltransferase 5, N-terminally processed	PRMT5
27.4359	27.5151	27.5903	27.4443	27.7476	27.7597			0.536787	0.136767	Q99832;F8WAM2;F8WBP8;A0A0D9SG95	T-complex protein 1 subunit eta	CCT7
29.1426	29.4193	29.2976	29.3563	29.5743	29.6152			0.94337	0.228767	P62937;F8WE65;C9J5S7;E5RIZ5;P0DN26;A0A0H2UH34;A0A0B4J2A2;A0A075B767;A0A075B759;Q9Y536;F5H284;P0DN37	Peptidyl-prolyl cis-trans isomerase A;Peptidyl-prolyl cis-trans isomerase A, N-terminally processed;Peptidyl-prolyl cis-trans isomerase	PPIA
29.4927	29.7148	29.5428	29.807	29.8123	29.8767			1.60638	0.248566	P05141;Q9H0C2	ADP/ATP translocase 2;ADP/ATP translocase 2, N-terminally processed	SLC25A5
27.5325	27.6928	27.6684	27.4392	27.7238	27.828			0.0914003	0.0324332	Q9H0D6	5-3 exoribonuclease 2	XRN2
29.3392	29.6282	29.5253	29.4238	29.3904	29.5274			0.207031	-0.0503667	P23526	Adenosylhomocysteinase	AHCY
26.9571	26.7081	26.7732	26.5882	26.8917	26.7903			0.183868	-0.0560659	Q5JRX3;A0A0A0MRX9;B1APQ0;H0Y7L7;H0Y4F7	Presequence protease, mitochondrial	PITRM1
27.2504	26.8957	27.0548	27.0521	26.9873	27.0009			0.197024	-0.0535336	Q14008;E9PQH5;H0YDX5;H0YCF6;H0YEK7	Cytoskeleton-associated protein 5	CKAP5
26.9156	27.0673	26.9949	26.8749	27.2141	27.3043			0.429543	0.1385	P42224;J3KPM9;E7EPD2;D2KFR9;E7ENM1;H7BZB5;E9PH66;H7BZ88	Signal transducer and activator of transcription 1-alpha/beta;Signal transducer and activator of transcription	STAT1
26.3222	27.0129	26.8238	26.7149	26.988	26.9093			0.273631	0.1511	Q7L014;A0A0C4DG89;D6RJA6;H0Y9U3	Probable ATP-dependent RNA helicase DDX46	DDX46
27.833	28.1678	28.2317	27.6052	28.0573	27.7277			0.699261	-0.280767	Q13263;M0R0K9;M0R2I3;M0R3C0	Transcription intermediary factor 1-beta	TRIM28
26.6598	27.1568	26.901	26.5822	26.8107	26.5738			0.699546	-0.2503	Q12789;H3BRD0;H3BU37;H3BU55	General transcription factor 3C polypeptide 1	GTF3C1
27.6202	27.3596	27.1807	27.4835	27.3312	27.2513			0.0766223	-0.0314999	P14868;H7BZ35;C9J7S3;C9JLC1;H7C278;C9JQM9	Aspartate--tRNA ligase, cytoplasmic	DARS
29.1204	29.3405	29.0856	28.6929	28.9492	29.0907			0.896111	-0.271233	P22234;E9PBS1;D6RF62	Multifunctional protein ADE2;Phosphoribosylaminoimidazole-succinocarboxamide synthase;Phosphoribosylaminoimidazole carboxylase	PAICS
26.9176	26.971	26.7362	26.8424	26.7332	26.4966			0.672292	-0.184201	P00533;E9PFD7;Q504U8;A0A0B4J1Y5;C9JYS6;J3KTI5;H3BLT0;B4DTR1;J3QLU9;A0A0A0MSE1;P04626;Q15303	Epidermal growth factor receptor;Receptor protein-tyrosine kinase	EGFR
30.3557	29.4027	28.5913	29.6405	29.0619	28.9795			0.150754	-0.2226	P07099;B1AQP8;B1AQP9	Epoxide hydrolase 1	EPHX1
27.8519	28.0495	28.0498	28.2472	28.2827	28.5376			1.52408	0.3721	P12956;B1AHC9	X-ray repair cross-complementing protein 6	XRCC6
25.7773	26.9281	26.9458	26.3677	26.939	26.9883			0.188733	0.2146	H7BXY3;Q7L2E3	Putative ATP-dependent RNA helicase DHX30	DHX30
27.7824	28.0104	27.8674	27.7453	27.9636	27.9031			0.0598291	-0.0160669	P31040;D6RFM5;A0A087X1I3;H0Y8X1	Succinate dehydrogenase [ubiquinone] flavoprotein subunit, mitochondrial	SDHA
29.5902	29.8112	29.6956	29.4633	29.8643	29.8876			0.092589	0.0394001	P39023;G5E9G0;H7C422;B5MCW2;H7C3M2;F8WCR1;Q92901	60S ribosomal protein L3	RPL3
27.8831	28.3056	27.9934	28.0563	28.0699	28.0046			0.0456446	-0.0171	P14866;M0QXS5;M0R1W6;M0R076;B4DVF8;M0QYL7	Heterogeneous nuclear ribonucleoprotein L	HNRNPL
28.5455	28.7779	28.5383	28.8164	28.8101	28.776			1.0631	0.180267	P25705;K7ERX7;K7EK77;K7EJP1;K7ENJ4;K7EQH4;K7ESA0	ATP synthase subunit alpha, mitochondrial	ATP5A1
27.9784	28.134	28.1057	28.0958	28.3061	28.3279			0.903015	0.170567	O95573;F5GWH2;F5H062	Long-chain-fatty-acid--CoA ligase 3	ACSL3
29.0215	29.0671	29.0214	29.1445	29.1549	29.213			2.16266	0.134133	P40926;G3XAL0	Malate dehydrogenase, mitochondrial;Malate dehydrogenase	MDH2
28.9729	29.293	29.3037	28.7215	28.8834	28.8814			1.39123	-0.3611	P23246;H0Y9K7;H0Y9U2	Splicing factor, proline- and glutamine-rich	SFPQ
27.4322	27.6424	27.5687	26.8103	26.7586	27.0155			2.63141	-0.6863	F5H6E2;O00159;I3L204;I3L4D4;I3L501;I3L3Y6;I3L168;I3L3F5	Unconventional myosin-Ic	MYO1C
27.9078	28.1229	28.0338	28.1002	28.1538	28.0886			0.637888	0.0926997	P50990;H7C4C8;H7C2U0	T-complex protein 1 subunit theta	CCT8
27.3412	27.5794	27.2958	27.2044	27.6117	27.7239			0.234595	0.107867	Q9H0A0;A0A087WV29;E9PMU0;E9PJN6	N-acetyltransferase 10	NAT10
27.0392	27.2629	27.3748	27.2073	27.4336	27.1791			0.138455	0.0477002	Q5JTH9;A0A087X1U8;A0A087X0G0;H7C1M8	RRP12-like protein	RRP12
26.8485	26.3244	26.8729	27.0344	25.9052	25.897			0.409481	-0.403067	A0A0D9SFK2;Q92614;H0YEV9	Unconventional myosin-XVIIIa	MYO18A
26.7738	26.3862	26.3982	28.104	27.2039	26.6297			0.820922	0.793133	P46821;D6RA32;D6RA40;D6RCL2;D6RGJ3	Microtubule-associated protein 1B;MAP1B heavy chain;MAP1 light chain LC1	MAP1B
25.8303	26.579	26.4898	26.487	26.8153	26.9444			0.75778	0.4492	Q13045;J3KS54;J3QQQ2;K7EP37;J3QQU5;K7EP27;J3QLR6;K7EQZ7;J3KS39	Protein flightless-1 homolog	FLII
27.8627	27.7645	27.771	28.0883	28.0043	27.9216			1.62854	0.205334	P78371;F5GWF6;F8VQ14	T-complex protein 1 subunit beta	CCT2
34.168	33.9607	34.7077	34.608	35.8005	35.5176			1.14484	1.0299	Q16891;B9A067;C9J406;H7C463;A0A087WYS0;D6RAW4	MICOS complex subunit MIC60	IMMT
27.9004	28.3666	28.3531	27.9506	28.2228	28.1992			0.177817	-0.0825005	A0A0R4J2E8;A8MXP9;P43243;D6REM6;D6R991;H0Y8T4;Q68E03;D6RBK5;D6R8Z5	Matrin-3	MATR3
26.8125	26.8978	26.9409	26.9381	26.9412	26.8455			0.191499	0.0245336	O95782	AP-2 complex subunit alpha-1	AP2A1
27.0528	27.0698	27.2205	26.968	26.9917	27.11			0.589364	-0.0911331	O95163;F5H2T0;H0YDF3	Elongator complex protein 1	IKBKAP
29.7893	29.3821	29.3224	29.7063	29.1355	29.2145			0.250055	-0.145833	P08243;F8WEJ5;C9J057;C9JT45;C9JM09;C9JLN6	Asparagine synthetase [glutamine-hydrolyzing]	ASNS
27.904	27.9124	28.0872	28.0935	27.8306	27.9202			0.0709121	-0.0197659	E7EX73;E9PGM1;E7EUU4;Q04637;A0A0A0MR52;C9JF13;C9J6B6;C9K073;C9J2Z7;H7C044;H7C0V6;F8WCF2;REV__F5H7J8;C9JHW9;REV__Q8NEG2;REV__C9JQZ6;REV__J3KQX6	Eukaryotic translation initiation factor 4 gamma 1	EIF4G1
31.8033	31.8339	31.5972	31.5522	31.6276	31.4806			1.05028	-0.191334	A0A0A0MSS8;P42330;S4R3Z2;S4R3D5	Aldo-keto reductase family 1 member C3	AKR1C3
27.237	27.4008	27.5571	26.7848	27.1571	26.8519			1.47156	-0.467033	Q8TEQ6	Gem-associated protein 5	GEMIN5
28.228	28.1165	27.9964	28.0852	28.002	28.0273			0.456793	-0.0754674	P41250;H7C443;F8WCK4	Glycine--tRNA ligase	GARS
29.8624	30.2472	29.9512	29.7686	30.1126	30.0757			0.0764092	-0.034633	P36578;H3BM89;H3BTP7;H3BU31	60S ribosomal protein L4	RPL4
26.8851	26.9533	27.0192	26.8735	27.0293	26.8938			0.118744	-0.0203323	Q99613;B5ME19;H3BPE3;H3BPE4;H3BTY8	Eukaryotic translation initiation factor 3 subunit C;Eukaryotic translation initiation factor 3 subunit C-like protein	EIF3C;EIF3CL
26.2146	26.6281	26.4701	25.8348	26.3011	26.2778			0.706105	-0.2997	A0A087WYK8;B1AKJ5;O43847;G3V1R5;F5H7V1;H0Y5G9	Nardilysin	NRD1
28.2885	28.4839	28.3955	28.3795	28.3574	28.5918			0.223436	0.0536003	P53618;E9PP73;E9PP63;E9PKQ1	Coatomer subunit beta	COPB1
26.5036	26.9416	26.8533	26.5021	26.8991	26.7554			0.0955144	-0.0473003	Q14690;S4R3Q4	Protein RRP5 homolog	PDCD11
28.1856	28.2818	28.4054	28.4448	28.5667	28.6697			1.3826	0.269467	P50991	T-complex protein 1 subunit delta	CCT4
28.3592	28.5579	28.4465	28.3366	28.2076	28.2924			1.19941	-0.175667	O94808;E5RJP4	Glutamine--fructose-6-phosphate aminotransferase [isomerizing] 2	GFPT2
26.6333	27.1826	26.9531	26.7131	27.0266	26.7705			0.175759	-0.0862668	Q92878;E7ESD9;E7EN38;H7C0P8;C9JNH8;E9PM98;H7C0V2	DNA repair protein RAD50	RAD50
26.9952	27.4184	27.2674	27.2965	27.1199	27.2442			0.0167865	-0.00680033	Q9Y678;H0Y8X7;D6RG17;H0Y8G2	Coatomer subunit gamma-1	COPG1
27.6064	27.8842	27.715	27.4522	27.674	27.5795			0.740204	-0.166633	P14735;Q5T5N3	Insulin-degrading enzyme	IDE
27.8808	27.6871	27.6879	27.958	27.7937	27.9228			0.790302	0.139566	Q9H4A4;A6NKB8;A0A087WU27;A0A087WUS4;C9JMZ3;H7C2T3	Aminopeptidase B	RNPEP
31.059	30.6686	30.8122	31.157	30.8273	30.8864			0.292515	0.110299	P52209;K7EM49;K7EMN2;K7EPF6;K7ELN9	6-phosphogluconate dehydrogenase, decarboxylating	PGD
28.0712	28.4199	28.5366	27.8694	28.6003	28.4072			0.0675928	-0.0502669	P26358;K7EJL0;K7ENW7;K7EMU8;K7ENQ6;K7EIZ6;K7EP77;K7ERQ1	DNA (cytosine-5)-methyltransferase 1	DNMT1
27.7773	27.9929	27.7638	27.8162	27.7609	27.8808			0.112239	-0.0253665	G5EA31;P53992;A0A0U1RR49	Protein transport protein Sec24C	SEC24C
29.3907	29.2947	29.1759	29.3056	29.2503	29.3632			0.0984293	0.0192661	O43776;K7EQ35;K7EIU7;K7EPK2;K7EMQ6;K7EJ19	Asparagine--tRNA ligase, cytoplasmic	NARS
28.6968	27.6581	27.9333	27.5916	27.3287	27.3529			0.978077	-0.671667	P15924	Desmoplakin	DSP
30.2261	30.3838	29.9333	29.8458	30.0812	29.8683			0.754781	-0.249301	E9PDR0;E7EX59;P05166;E7EUY3;E7ETT1;C9JQS9;E7ETT4;F8WBI9;E9PEC3;E7ENC1;H7C5C9;C9JVW9;C9JVY9;C9JAW3	Propionyl-CoA carboxylase beta chain, mitochondrial	PCCB
28.0727	28.2971	28.2435	28.3389	28.417	28.4751			1.23463	0.2059	H3BLZ8;Q92841;A0A0U1RQJ0	Probable ATP-dependent RNA helicase DDX17	DDX17
27.9343	28.3702	28.2863	28.1246	28.6781	28.4805			0.477236	0.2308	A0A0D9SFB3;A0A0D9SG12;A0A0D9SF53;O00571;O15523;A0A0J9YVQ7;C9J081;C9J8G5;A0A087WVZ1;D6RCM4;Q9NQI0;A0A087WX09;B4DLA0;A0A0J9YYH6;H0Y960	ATP-dependent RNA helicase DDX3X;ATP-dependent RNA helicase DDX3Y	DDX3X;DDX3Y
27.1629	27.5675	27.3593	27.2767	27.5304	27.5316			0.224722	0.0829995	A0A087WTP3;Q92945;M0R0I5;M0QYH3;M0QXW7;M0QYG1;M0R0C6;M0R3J3;M0R251;M0R263	Far upstream element-binding protein 2	KHSRP
31.856	31.9152	31.9987	32.0023	32.1466	31.9629			0.753459	0.113967	P68104;Q5VTE0;A0A087WVQ9;A0A087WV01;Q5JR01;A6PW80	Elongation factor 1-alpha 1;Putative elongation factor 1-alpha-like 3;Elongation factor 1-alpha	EEF1A1;EEF1A1P5
31.0351	30.9158	31.1473	30.9993	31.0832	31.0984			0.138459	0.0275663	P07195;A8MW50;F5H793	L-lactate dehydrogenase B chain;L-lactate dehydrogenase	LDHB
27.4639	27.5073	27.9021	27.4755	27.6997	27.5892			0.0836055	-0.0363	P22102;F8WD69;C9JBJ1;C9JTV6;H7C366	Trifunctional purine biosynthetic protein adenosine-3;Phosphoribosylamine--glycine ligase;Phosphoribosylformylglycinamidine cyclo-ligase;Phosphoribosylglycinamide formyltransferase	GART
28.3369	28.6174	28.7926	28.514	28.6395	28.6684			0.0615729	0.0249996	P08670;B0YJC4;B0YJC5;Q5JVS8;H7C5W5;P41219;F8W835;A0A087WYG8;E7EMV2;E7ESP9;Q16352;P07196;P07197	Vimentin	VIM
29.1386	29.0912	29.3454	29.2107	29.2174	29.2759			0.20546	0.0429331	Q14974;J3KTM9;J3QR48;J3QRG4	Importin subunit beta-1	KPNB1
28.9384	28.4112	28.4334	29.1954	28.5842	28.5353			0.258087	0.1773	P17655	Calpain-2 catalytic subunit	CAPN2
27.5857	27.8909	28.0532	27.5532	28.1099	27.9339			0.0354338	0.0224005	Q15393;J3QRB2;J3QL37;I3L4G7;J3QKV4	Splicing factor 3B subunit 3	SF3B3
28.4191	28.7621	28.6777	28.4812	28.8397	28.5799			0.0316893	0.0139669	P61978;S4R457;S4R359	Heterogeneous nuclear ribonucleoprotein K	HNRNPK
27.9967	28.5184	28.4465	28.1308	28.3354	28.3758			0.0780229	-0.0398674	P31948;F5H783;F5GXD8;H0YGI8	Stress-induced-phosphoprotein 1	STIP1
27.2593	27.6501	27.4996	27.1986	27.2656	27.3517			0.742814	-0.1977	Q9NYU2;H7BZG0;Q9NYU1;F8WCI2;F8WCE6	UDP-glucose:glycoprotein glucosyltransferase 1	UGGT1
27.4412	27.9849	27.808	27.2529	27.7376	27.5434			0.474691	-0.2334	P13667	Protein disulfide-isomerase A4	PDIA4
26.8757	27.4601	27.415	27.1041	27.321	27.2781			0.0267305	-0.0158679	K7EIG1;I3L318;I3L4B5;Q9Y5I4		CLUH
27.7877	27.6857	27.5302	27.5987	27.4858	27.4946			0.784751	-0.1415	Q14152	Eukaryotic translation initiation factor 3 subunit A	EIF3A
32.0732	32.4317	32.3425	32.1332	32.5468	32.6057			0.32722	0.1461	P68363;C9JDS9	Tubulin alpha-1B chain	TUBA1B
27.3486	27.4799	27.5633	27.5433	27.5634	27.4425			0.291474	0.0524667	P55060	Exportin-2	CSE1L
28.3836	28.1682	28.2914	28.5993	28.4021	28.3367			0.753461	0.164967	P50395;Q5SX87;V9GYF8;Q5SX90;V9GYJ7;Q5SX91	Rab GDP dissociation inhibitor beta	GDI2
27.5149	27.5436	27.4399	27.476	27.5606	27.5275			0.21541	0.0219002	P63010;A0A087X253;A0A087WU93;A0A087WZQ6;A0A087WYD1;K7EN71;K7ERB2;K7EJ01;K7EJX1	AP-2 complex subunit beta	AP2B1
28.3287	28.3626	28.3949	28.2493	28.2836	28.2435			1.97249	-0.103266	P11021	78 kDa glucose-regulated protein	HSPA5
27.6041	27.1765	26.7965	27.0862	26.9103	26.8053			0.449884	-0.258433	P12270;Q5SWX9	Nucleoprotein TPR	TPR
27.242	27.5853	27.4084	27.227	27.507	27.5883			0.0682766	0.0288664	Q2TB90	Putative hexokinase HKDC1	HKDC1
28.2561	28.4993	28.5231	28.6191	28.8917	28.8159			1.38398	0.349401	O14980;C9JKM9;C9IZS4;C9JQ02;C9JV99;C9J673;F8WF71;C9IYM2;H7BZC5;C9JF49	Exportin-1	XPO1
27.3602	28.0479	28.1371	27.5085	27.855	27.7942			0.18399	-0.129167	Q9NR30	Nucleolar RNA helicase 2	DDX21
26.9839	27.0186	27.0535	27.2081	27.1776	27.4767			1.29707	0.2688	Q9BQG0;I3L1L3;I3L2H8	Myb-binding protein 1A	MYBBP1A
31.6823	31.6795	31.8076	31.778	31.7745	31.8352			0.713497	0.072766	P00338;F5GYU2;F5GXY2;F5GXH2;F5H5J4;F5H6W8;F5GZQ4;F5H8H6;F5GXC7;F5GWW2;F5GXU1;F5H5G7;F5H155;A0A087WUM2;G3XAP5;F5H245;Q6ZMR3;P07864	L-lactate dehydrogenase A chain	LDHA
30.3029	30.4922	30.5489	30.5905	30.3542	30.3527			0.0491042	-0.0155341	P04075;H3BQN4;J3KPS3;H3BPS8;H3BUH7;H3BR04;H3BMQ8;H3BU78;H3BR68	Fructose-bisphosphate aldolase A;Fructose-bisphosphate aldolase	ALDOA
29.8637	29.8218	29.8098	29.8566	29.8087	29.8481			0.0982117	0.00603358	Q16719;A0A087X297;B8ZZA3;A0A087WYM2;F8WEP1;A0A087WYQ7	Kynureninase	KYNU
27.5037	27.2163	27.4798	27.014	26.9935	26.9813			1.91882	-0.403666	P33176;A0A0G2JMZ6;O60282;C9JWB9	Kinesin-1 heavy chain	KIF5B
31.9199	32.13	31.9652	31.9292	31.9826	31.9079			0.409158	-0.0651347	P06733;K7EM90;K7ERS8;E5RI09;E5RG95;K7EPM1;K7EKN2;E5RGZ4	Alpha-enolase	ENO1
27.1082	27.1304	27.0596	27.5554	27.0201	27.43			0.654498	0.235767	Q9NZB2;A0A0C4DH52;A0A0C4DG79;Q5T035	Constitutive coactivator of PPAR-gamma-like protein 1	FAM120A
29.5399	29.6912	29.618	29.6048	29.9372	29.7619			0.64975	0.1516	P10809;E7EXB4;E7ESH4;C9JL25;C9JL19;C9JCQ4;C9J0S9	60 kDa heat shock protein, mitochondrial	HSPD1
27.8171	27.803	27.9693	28.4437	28.1752	28.0225			1.22806	0.350667	B4DUR8;P49368;Q5SZX6;E9PRC8;E9PQ35;Q5SZW8;E9PM09;Q5SZX9	T-complex protein 1 subunit gamma	CCT3
27.5247	27.698	27.6036	27.5558	27.4609	27.6004			0.465254	-0.0697333	A2A274;Q99798	Aconitate hydratase, mitochondrial	ACO2
28.6764	27.4239	27.5992	28.4945	27.6422	27.1937			0.0793722	-0.123033	Q8IVF2	Protein AHNAK2	AHNAK2
27.4096	27.1571	27.6258	27.3894	26.8413	27.1604			0.568693	-0.267133	Q14980;F5H4J1;F5H6Y5;F5H0Z7;F5H763;F5H2F3;F5H3L6;F5GZW1;F5H1L0;F8W6T3;F5GWK2;F5H073;F5H068;F5H7R5;F5H4Y4;F5GWA2	Nuclear mitotic apparatus protein 1	NUMA1
31.8044	29.4051	30.687	31.503	27.796	29.0276			0.388199	-1.18997	P35908;Q01546;CON__Q01546;CON__Q6NXH9;CON__Q9R0H5	Keratin, type II cytoskeletal 2 epidermal	KRT2
27.6825	27.8185	27.8183	27.8286	28.0013	27.9217			1.00301	0.1441	P05023;M0R116;B1AKY9;A0A0A0MT26;P13637;P50993;H0Y7C1;Q13733;P20648;P54707;Q5TC01;Q5TC02;M0QXF2;E9PRA5	Sodium/potassium-transporting ATPase subunit alpha-1	ATP1A1
28.594	28.5958	28.4586	28.4947	28.2309	28.5061			0.619825	-0.1389	Q9NSE4	Isoleucine--tRNA ligase, mitochondrial	IARS2
29.2918	29.0726	29.0494	29.4832	29.3221	29.4105			1.38324	0.267333	P40939;H0YFD6	Trifunctional enzyme subunit alpha, mitochondrial;Long-chain enoyl-CoA hydratase;Long chain 3-hydroxyacyl-CoA dehydrogenase	HADHA
27.581	27.5749	27.6381	27.6909	27.7185	27.6875			1.96861	0.100967	Q8WUM4;C9IZF9;F8WEQ7;F8WBR8;F8WDK9	Programmed cell death 6-interacting protein	PDCD6IP
28.2103	28.4209	28.213	28.462	28.482	28.2848			0.613747	0.1282	Q86VP6;A0A0C4DGH5;H0YH27;O75155	Cullin-associated NEDD8-dissociated protein 1	CAND1
27.3896	27.6171	27.6759	27.3775	27.727	27.7137			0.114026	0.0451997	Q92621;U3KPX2;U3KQ97;U3KQ47	Nuclear pore complex protein Nup205	NUP205
29.0911	29.2308	29.0371	28.9267	29.0278	29.0024			0.96246	-0.134034	P31939;H7C1S2;C9JLK0;F8WEF0	Bifunctional purine biosynthesis protein PURH;Phosphoribosylaminoimidazolecarboxamide formyltransferase;IMP cyclohydrolase	ATIC
27.5749	27.2768	27.2989	27.6849	27.4518	27.4058			0.433277	0.130633	P18206;Q5JQ13	Vinculin	VCL
28.6248	28.7188	28.563	28.5486	28.3843	28.5441			0.950471	-0.1432	E9PLK3;P55786;A6NEC2;H0YDG0;E9PP11;E9PJY4;E9PPD4;H0YCQ5;E9PRQ5;E9PJF9;E9PPZ2	Puromycin-sensitive aminopeptidase	NPEPPS
28.6044	28.6421	28.6571	28.8274	28.7094	28.628			0.657222	0.0870667	P38646;H0Y8S0;D6RJI2;D6RA73;H0YBG6	Stress-70 protein, mitochondrial	HSPA9
30.4178	30.6854	30.4381	30.4756	30.3902	30.5025			0.246769	-0.0576674	Q96RQ3;E9PHF7;F5GYT8;E9PG35;G5E9X5	Methylcrotonoyl-CoA carboxylase subunit alpha, mitochondrial	MCCC1
27.9892	27.5699	27.7464	27.8137	27.6029	27.6047			0.27051	-0.0947342	Q68CZ2;C9JWN9;C9JTD0	Tensin-3	TNS3
31.0478	31.1234	31.275	31.7603	31.515	31.5498			1.9728	0.459634	P07355;H0YN42;H0YMD0;H0YMU9;A6NMY6;H0YKS4;H0YM50;H0YN28;H0YL33;H0YMM1;H0YNA0;H0YKZ7;H0YLV6;H0YMT9;H0YKX9;H0YN52;H0YKL9;H0YMW4;H0YMD9;H0YKV8;H0YNB8;H0YKN4;H0YLE2	Annexin A2;Annexin;Putative annexin A2-like protein	ANXA2;ANXA2P2
30.5352	30.5408	30.4594	30.8763	30.7245	30.8692			2.29151	0.311534	P00558;P07205	Phosphoglycerate kinase 1	PGK1
28.3585	28.1691	28.4102	28.5745	28.598	28.3395			0.801576	0.1914	O00410;H0Y8C6;E7ETV3;E7EQT5;H0Y3V4;E7EV12;C9JMV5;C9JZD8;E7EWK4;E7EX05;C9JZ53;C9JQT6;E7ESA1;E7ESZ1;E7ETV8;C9JXE0;C9J875;O60518	Importin-5	IPO5
28.412	28.6994	28.5492	28.4274	28.5738	28.4895			0.239387	-0.0566336	Q92499;F1T0B3;A0A087X2G1	ATP-dependent RNA helicase DDX1	DDX1
27.722	28.1031	27.9826	28.1598	28.0435	28.1193			0.66167	0.171634	P14625;Q96GW1;Q58FF3;F8W026;H0YIV0	Endoplasmin	HSP90B1
31.577	31.4358	31.4694	31.6676	31.4549	31.3849			0.0297256	0.00839996	O60218	Aldo-keto reductase family 1 member B10	AKR1B10
31.2843	31.5438	31.5484	31.3652	31.6856	31.7701			0.417531	0.148133	P68371;M0R2D3;A6NNZ2;M0R0X0;M0QY37;M0QX14;M0R042;M0R2T4;A0A075B724	Tubulin beta-4B chain	TUBB4B
33.6252	33.246	33.4253	33.6728	33.4643	33.3368			0.150025	0.0591329	P60709;G5E9R0;E7EVS6;C9JZR7;C9JTX5	Actin, cytoplasmic 1;Actin, cytoplasmic 1, N-terminally processed	ACTB
28.6884	29.0871	29.2006	29.252	29.7276	29.7336			1.22177	0.579034	F5GZS6;J3KPF3;P08195;H0YFS2;F5GZI0;H0YFX4	4F2 cell-surface antigen heavy chain	SLC3A2
29.2833	28.969	28.9272	29.5555	28.3465	28.3871			0.291439	-0.2968	P11216;H0Y4Z6	Glycogen phosphorylase, brain form	PYGB
27.7886	28.2882	28.1305	27.9087	28.0777	28.0324			0.150294	-0.0628338	Q16531;F5GY55;F5H2L3;F5GWI0;F5GZY8;F5GYG8;F5H198	DNA damage-binding protein 1	DDB1
28.5471	28.5138	28.3354	28.5382	28.4224	28.6064			0.268149	0.0569	P47897;B4DDN1;H7C0R3;A0A0U1RQT0;C9J165;A0A0U1RQX5;A0A0U1RRC8;A0A0U1RQQ5;A0A0U1RQM8;A0A0U1RR66;A0A0U1RQU2;A0A0U1RQE9;A0A0U1RRI9;A0A0U1RQL2;A0A0U1RQX9;A0A0U1RQJ6;F2Z2V6;A0A0U1RQC3;A0A0U1RRJ7;A0A0U1RR79	Glutamine--tRNA ligase	QARS
27.6119	27.9659	27.8986	28.9497	27.9387	27.9495			0.573166	0.453833	P33527;I3L4X2;A0A0A0MS99	Multidrug resistance-associated protein 1	ABCC1
33.2444	32.2496	32.0532	33.438	32.1638	32.3115			0.0788209	0.122033	P15121;E9PCX2;E9PEF9	Aldose reductase	AKR1B1
28.2764	28.3371	28.5459	28.2423	28.2812	28.341			0.495736	-0.0982997	Q15029;K7EP67;K7EJ74;K7EIV5;K7EIT3	116 kDa U5 small nuclear ribonucleoprotein component	EFTUD2
28.7003	29.0734	28.7837	28.8313	28.5363	28.8393			0.317351	-0.116833	P26639;D6R9F8;D6RCA5;D6RDJ6;D6RBR8;D6RJ97;D6RHV7;D6RCS6	Threonine--tRNA ligase, cytoplasmic	TARS
28.4961	28.6065	28.5962	28.3338	28.3081	28.5013			1.24124	-0.1852	P26640;H0Y426;A2ABF4;A0A0G2JJT9	Valine--tRNA ligase	VARS
29.9461	30.2306	30.276	30.0819	30.3315	30.2966			0.264615	0.0857665	P07900;G3V2J8;Q58FG0;Q14568	Heat shock protein HSP 90-alpha	HSP90AA1
29.0511	28.9874	28.8601	29.0373	29.0571	28.9496			0.302599	0.048467	P56192;H0YIP0;H0YI94;H0YHV5;F5H2V6;H0YIC2;F8VS26;F8W0M7;F8W0S4;F8VZZ9;F8VPL7;H0YHL6;H0YI27	Methionine--tRNA ligase, cytoplasmic	MARS
29.1955	29.4818	29.3935	29.3472	29.459	29.7222			0.47328	0.152534	P02786;G3V0E5;H7C3V5;F8WBE5	Transferrin receptor protein 1;Transferrin receptor protein 1, serum form	TFRC
29.8584	29.882	29.9841	30.4507	30.5713	30.2084			1.94025	0.501967	P04083;Q5T3N1;Q5T3N0	Annexin A1	ANXA1
28.2454	28.4743	28.5436	28.44	28.7081	28.7139			0.714779	0.199567	P17987;E7ERF2;E7EQR6;F5H282;F5H136;F5GZ03;F5H676;F5H726;F5GZI8;F5H7Y1;F5GYL4	T-complex protein 1 subunit alpha	TCP1
31.3687	31.6853	31.6731	31.2177	31.6702	31.6881			0.0972187	-0.0503667	P30838;C9JMC5;I3L3I9;E9PNN6;A8MYB8;C9JKT2;I3L4E5;I3L1H6;I3L3W9;E9PJV0;P48448	Aldehyde dehydrogenase, dimeric NADP-preferring	ALDH3A1
29.3023	29.2918	29.1709	29.1295	29.0526	29.1725			1.17292	-0.136799	P21399	Cytoplasmic aconitate hydratase	ACO1
30.0114	30.4245	30.2979	29.8027	30.1648	30.2125			0.445883	-0.1846	E9PIR7;F8W809;A0A087WSW9;E9PNQ6;A0A087WSY9;Q16881;E2QRB9;E9PKD3;A0A0B4J225;E9PIZ5;E9PLT3;E9PKI4;E9PQI3;E9PRI8	Thioredoxin reductase 1, cytoplasmic	TXNRD1
29.8699	29.8126	29.7716	29.7941	29.6431	29.6326			1.01115	-0.128099	Q16555;E5RFU4;E9PD68;Q14195;Q14194;H0YBT4;D6RF19	Dihydropyrimidinase-related protein 2	DPYSL2
29.4713	29.2749	29.496	29.5383	29.5629	29.4058			0.444746	0.0882664	A0A0G2JIW1;P0DMV9;P0DMV8;V9GZ37	Heat shock 70 kDa protein 1B;Heat shock 70 kDa protein 1A	HSPA1B;HSPA1A
29.2817	29.2474	29.0672	29.4374	29.2021	29.1712			0.266435	0.0714671	P26038;E9PNP4	Moesin	MSN
27.5956	27.6549	27.8129	27.3614	27.6847	27.7341			0.284844	-0.0943998	Q7Z2W4;C9J6P4;H7C5K1	Zinc finger CCCH-type antiviral protein 1	ZC3HAV1
28.2285	28.405	28.2411	28.2418	28.3851	28.3928			0.255924	0.0483659	Q92598;A0A0A0MSM0;R4GN69;Q5TBM3	Heat shock protein 105 kDa	HSPH1
29.0257	29.0933	28.9951	28.8967	28.9377	28.9224			1.71716	-0.1191	P49588;H3BPK7	Alanine--tRNA ligase, cytoplasmic	AARS
28.7256	29.0958	28.9076	28.7096	28.9939	28.8354			0.17854	-0.0633666	Q7KZF4;H7C597	Staphylococcal nuclease domain-containing protein 1	SND1
28.6947	28.9742	28.9565	28.6438	29.0037	28.8024			0.159154	-0.058499	P09874;Q5VX84;Q5VX85	Poly [ADP-ribose] polymerase 1	PARP1
30.4682	30.7664	30.6638	30.4383	30.4851	30.5805			0.608135	-0.1315	Q00839;Q5RI18	Heterogeneous nuclear ribonucleoprotein U	HNRNPU
28.5779	29.094	28.9444	28.6969	28.7871	28.688			0.400465	-0.148101	Q12906;K7EKJ9;K7EJ09;K7ER69;K7EQR9;K7EM82;K7ERM6;K7ENK6;K7EKY0;K7EQ75;K7EPG3;K7ELV3	Interleukin enhancer-binding factor 3	ILF3
28.4077	28.5856	28.6132	28.3876	28.6171	28.5132			0.11611	-0.0295328	P02545;Q3BDU5;Q5TCI8;A0A0C4DGC5;H0YAB0	Prelamin-A/C;Lamin-A/C	LMNA
27.7651	27.5622	27.6106	27.6008	27.5746	27.5192			0.545344	-0.0811005	P35580;E7ERA5;A0A087X0T3;P12883;P13535;Q9UKX3;Q9Y623;P13533;P12882;P11055;Q9UKX2;A7E2Y1	Myosin-10	MYH10
29.2371	29.5753	29.3645	28.8103	29.0251	29.378			0.767485	-0.321166	Q14764;H3BQK6;H3BRL2;H3BUK7;H3BNF6;H3BP76;H3BPZ2;H3BNF2;H3BUP3;H3BQE7;I3L155	Major vault protein	MVP
28.2658	28.692	28.5447	28.3309	28.0889	28.5085			0.476265	-0.191401	P11717;S4R328	Cation-independent mannose-6-phosphate receptor	IGF2R
28.6019	28.7355	28.7088	28.6551	28.7302	28.7122			0.135104	0.0171	P11586	C-1-tetrahydrofolate synthase, cytoplasmic;Methylenetetrahydrofolate dehydrogenase;Methenyltetrahydrofolate cyclohydrolase;Formyltetrahydrofolate synthetase;C-1-tetrahydrofolate synthase, cytoplasmic, N-terminally processed	MTHFD1
28.2406	28.4261	28.5408	28.1679	28.3211	28.4288			0.346055	-0.0965665	O75533;H7C341;B4DGZ4;F8WC19	Splicing factor 3B subunit 1	SF3B1
29.3948	29.958	29.6284	30.184	29.9921	29.7463			0.690988	0.313733	P05783;F8VZY9;CON__H-INV:HIT000015463	Keratin, type I cytoskeletal 18	KRT18
29.5972	29.2597	28.9948	29.1513	29.0396	29.2765			0.274484	-0.1281	P12814;H9KV75;G3V2N5;H7C5W8;G3V2W4;H0YJW3;H0YJ11;G3V5M4;G3V2X9;G3V380;G3V2E8	Alpha-actinin-1	ACTN1
29.5952	29.5394	29.5621	29.4291	29.6282	29.6938			0.0786975	0.0181338	Q9P2J5;A0A087WXY1	Leucine--tRNA ligase, cytoplasmic	LARS
29.1429	29.3356	29.1141	29.3853	29.2985	29.3707			0.967634	0.153967	P22314;Q5JRR6;Q5JRR9;Q5JRS0;Q5JRS1;Q5JRS3;Q5JRS2	Ubiquitin-like modifier-activating enzyme 1	UBA1
28.83	28.5067	28.698	28.94	28.8316	28.7581			0.698379	0.165	P54136;E5RJM9;E5RH09;E5RI24	Arginine--tRNA ligase, cytoplasmic	RARS
30.4018	30.2432	30.2558	30.4956	30.4153	30.3259			0.725547	0.112	P11142;E9PKE3;E9PN89;E9PNE6;E9PLF4;A8K7Q2;E9PQQ4;E9PQK7;E9PK54;E9PPY6;E9PI65;E9PN25;E9PM13;E9PS65	Heat shock cognate 71 kDa protein	HSPA8
28.3292	28.1335	28.1273	28.3183	27.8739	27.7996			0.497446	-0.1994	A0A0A0MRV0;Q9P2E9;A0A087WVV2;A0A087WU26;A2A2S5;V9GY78;H0YDJ4;H9KV85;E9PN67;C9J066;Q8N4C6	Ribosome-binding protein 1	RRBP1
29.1298	29.2531	29.2038	29.1784	29.2327	29.4249			0.428332	0.0831	P19367;B1AR63;B1AR62;B1AR61	Hexokinase-1	HK1
27.1723	26.6238	26.8611	29.2045	28.1639	27.8415			1.58103	1.51757	P16144;J3QQL2;J3QRK0	Integrin beta-4	ITGB4
29.0257	29.1053	29.08	28.9831	29.1379	29.1612			0.145456	0.0237331	P34932;A0A087WYC1	Heat shock 70 kDa protein 4	HSPA4
32.2113	31.954	32.0518	32.1414	31.942	31.8954			0.303907	-0.0794341	P21980;A2A299;A2A2A0	Protein-glutamine gamma-glutamyltransferase 2	TGM2
27.8232	27.3186	27.7033	27.4246	27.2014	28.1259			0.0330433	-0.0310663	Q709C8	Vacuolar protein sorting-associated protein 13C	VPS13C
27.8992	27.7746	27.5774	27.7573	27.945	28.1916			0.613229	0.214233	Q7Z6Z7;H0Y659;A0A087X1S3;A0A087X146	E3 ubiquitin-protein ligase HUWE1	HUWE1
31.7311	31.6768	31.6595	31.8407	31.9031	31.8367			2.30629	0.171033	P11413;E9PD92	Glucose-6-phosphate 1-dehydrogenase	G6PD
27.9976	27.9031	27.9487	27.9277	27.8811	27.7752			0.772911	-0.0884666	P49792;F8VYC4;P0DJD0;P0DJD1;Q99666;O14715;J3KQ37;F8W705;H0YBN8;C9J6W1;F8WBP7;C9J1W9;C9JF75	E3 SUMO-protein ligase RanBP2	RANBP2
31.2598	31.5495	31.4319	31.0612	31.1134	31.3893			0.789158	-0.225767	Q06210	Glutamine--fructose-6-phosphate aminotransferase [isomerizing] 1	GFPT1
29.3833	29.6207	29.4461	29.1439	29.1365	29.5329			0.64353	-0.212268	Q02218;E9PCR7;A0A0D9SFS3;E9PDF2;E9PFG7;C9J4G7;Q9ULD0	2-oxoglutarate dehydrogenase, mitochondrial	OGDH
32.3079	32.4906	32.3929	32.4768	32.4278	32.4508			0.427414	0.0546672	P29401;A0A0B4J1R6;E9PFF2;F8W888;F8WAX4	Transketolase	TKT
31.6861	32.001	31.8251	31.7762	31.8783	31.938			0.0930627	0.0267665	P05165;H0Y5U0;Q5JTW6;Q5JVH2;H0Y4B9;H0Y798	Propionyl-CoA carboxylase alpha chain, mitochondrial	PCCA
28.3016	28.3362	28.39	28.212	28.2227	28.2896			1.33803	-0.101166	Q5T4S7;A0A0A0MSW0;X6R960;X6RE05;Q5TBN9	E3 ubiquitin-protein ligase UBR4	UBR4
29.2768	29.3902	29.41	30.3474	30.4775	30.2217			3.5134	0.989868	P16615;H7C5W9;O14983;H3BVB2;A0A0C4DH86;J3QSY6;H3BTW4	Sarcoplasmic/endoplasmic reticulum calcium ATPase 2	ATP2A2
27.9636	28.2202	28.2752	27.8002	28.2492	28.197			0.15478	-0.0708663	A0A0A0MTR7;A0A0A0MTC1;Q63HN8;I3L3H9	E3 ubiquitin-protein ligase RNF213	RNF213
29.6952	29.5886	29.6508	29.5414	29.541	29.6107			0.976432	-0.0804996	P53621	Coatomer subunit alpha;Xenin;Proxenin	COPA
31.5188	31.5834	31.5256	31.2658	31.4045	31.3907			1.75013	-0.188934	P55072;C9IZA5;C9JUP7	Transitional endoplasmic reticulum ATPase	VCP
31.4504	31.7871	31.7721	31.6473	31.916	31.7658			0.325196	0.106501	P08238;Q58FF7	Heat shock protein HSP 90-beta	HSP90AB1
30.4589	30.2982	30.4177	30.1821	30.2552	30.3386			0.941188	-0.132967	P41252;A0A0A0MSX9;J3KR24;Q5TCD1;Q5TCC6;Q5TCC9	Isoleucine--tRNA ligase, cytoplasmic	IARS
33.6539	33.617	33.6813	33.6909	33.7467	33.7453			1.37235	0.0768992	P14618;B4DNK4;H3BTN5;H3BR70;H3BQ34;H3BUW1;H3BTJ2;H3BT25;H3BU13;H3BN34;H3BQZ3;P30613	Pyruvate kinase PKM;Pyruvate kinase	PKM
29.6945	29.0098	29.1681	29.5334	29.2611	29.2256			0.0756919	0.0492331	Q9Y490;Q9Y4G6;H0YMT1	Talin-1	TLN1
29.2014	28.5734	28.8079	29.1174	28.6984	28.5502			0.104111	-0.0722338	Q13813;A0A0D9SFF6;A0A0D9SFH4	Spectrin alpha chain, non-erythrocytic 1	SPTAN1
29.7164	29.792	29.8689	29.6925	29.8081	29.7443			0.328492	-0.0441335	O75643;B4E0P5	U5 small nuclear ribonucleoprotein 200 kDa helicase	SNRNP200
31.6127	31.7384	31.7539	31.5516	31.8452	31.8328			0.14593	0.0415332	P13639;M0R0I6	Elongation factor 2	EEF2
28.9446	28.7342	28.8927	29.0606	29.0805	29.0556			1.51146	0.2084	Q92616	Translational activator GCN1	GCN1L1
29.2105	28.5082	28.8041	29.1366	28.8242	28.5845			0.0095405	0.00749969	Q01082;A0A087WUZ3;F8W6C1;A4QPE4;E9PJZ2	Spectrin beta chain, non-erythrocytic 1	SPTBN1
30.8904	31.2235	31.2299	30.9319	31.1755	31.2581			0.016117	0.00723394	Q08211	ATP-dependent RNA helicase A	DHX9
31.4442	31.2316	31.0536	31.4452	31.2451	31.5159			0.49938	0.158933	P53396;K7ESG8;K7EIE7	ATP-citrate synthase	ACLY
31.5495	31.2842	31.4158	31.44	31.2963	31.2296			0.406808	-0.0945326	O43707;F5GXS2;H7C144;K7EP19;D6RH00	Alpha-actinin-4	ACTN4
30.2871	30.5515	30.4566	30.205	30.4771	30.5175			0.0908431	-0.0318667	Q6P2Q9;I3L0J9;I3L3Z8;I3L1T8	Pre-mRNA-processing-splicing factor 8	PRPF8
28.5418	28.6152	28.8124	28.5594	28.6885	28.2136			0.446009	-0.1693	A0A087WV66;P46013	Antigen KI-67	MKI67
34.2672	34.2435	34.0565	34.2115	34.1215	34.0455			0.31305	-0.0629005	P11498;E9PRE7;E9PS68	Pyruvate carboxylase, mitochondrial	PC
30.2087	29.9569	29.9582	30.1791	29.9862	29.9471			0.0113736	-0.00380007	P46940;A0A0J9YXZ5;H0YLE8;A0A087X225;H0YKA5;A0A087WWP1;F2Z2E2;Q86VI3	Ras GTPase-activating-like protein IQGAP1	IQGAP1
31.1536	31.1101	31.0135	30.9735	30.8661	30.9768			1.30597	-0.1536	P07814;V9GYZ6;V9GZ76	Bifunctional glutamate/proline--tRNA ligase;Glutamate--tRNA ligase;Proline--tRNA ligase	EPRS
31.8927	31.7643	31.804	31.9025	31.7917	31.9497			0.432957	0.0609665	A0A087WVQ6;Q00610;J3KS13;K7EJJ5;J3KSQ2;J3QL20;J3KRF5	Clathrin heavy chain;Clathrin heavy chain 1	CLTC
32.0705	31.6553	31.683	32.0945	31.6072	31.4819			0.118929	-0.0750662	P35579;Q5BKV1;B1AH99;A0A0C4DFM8	Myosin-9	MYH9
32.0479	32.2332	32.2189	31.8922	32.1006	32.1467			0.53932	-0.120166	Q9NZM1;H0YD14	Myoferlin	MYOF
33.6276	33.7453	33.6637	33.5643	33.7088	33.64			0.308997	-0.0411669	Q13085;Q59FY4;A0A0C4DGT1;A0A087X0W4;A0A087WWN5;A0A087X2F8;A0A087X126;S4R3S7;A0A087WVR6;A0A087WYS8	Acetyl-CoA carboxylase 1;Biotin carboxylase	ACACA
30.8766	30.7509	30.7579	30.8327	30.8191	30.8684			0.44548	0.0449333	Q14204;H0YJ21	Cytoplasmic dynein 1 heavy chain 1	DYNC1H1
33.8661	33.3521	33.4985	33.6732	33.2756	33.1738			0.386364	-0.198034	P21333;Q5HY54;F8WE98;H0Y5C6;H0Y5F3;H7C2E7	Filamin-A	FLNA
31.6828	31.9089	31.8158	31.7074	31.7855	31.9404			0.030537	0.0085996	P78527;F5GX40;H0YG84	DNA-dependent protein kinase catalytic subunit	PRKDC
33.1163	32.74	32.8518	32.7788	32.6362	32.5041			0.895886	-0.262999	O75369;E7EN95;H7C5L4;A0A0C4DGA1	Filamin-B	FLNB
32.5748	29.5572	31.3947	32.0887	30.5061	29.9657			0.107176	-0.322066	Q09666;E9PQE3;E9PJZ0;E9PKR9;E9PJC6;E9PLK4	Neuroblast differentiation-associated protein AHNAK	AHNAK
33.1382	32.1516	32.7704	32.7188	32.2928	32.0847			0.395769	-0.321299	Q15149;E9PMV1;E9PKG0;E9PQ28;E9PIA2	Plectin	PLEC

## Sheet: Comparison across cell lines
LFQ intensities (log2) - global imputation																				Global data				T-tests (individual)									Protein annotation and information
A549						Jurkat						K562												A549			Jurkat			K562
DMSO_A	DMSO_B	DMSO_C	probe3_A	probe3_B	probe3_C	DMSO_A	DMSO_B	DMSO_C	probe3_A	probe3_B	probe3_C	DMSO_A	DMSO_B	DMSO_C	DMSO_E	probe3_A	probe3_B	probe3_C	probe3_E	Intensity	MS/MS Count	Razor + unique peptides	Sequence coverage [%]	Significant	pvalue	enrichment	Significant	pvalue	enrichment	Significant	pvalue	enrichment	Protein IDs	Majority protein IDs	Protein names	Gene names	Mol. weight [kDa]	GO (biological process)	GO (molecular function)	GO (cellular component)	GO IDs
21.9299	22.6814	21.7211	25.8956	25.7342	25.8226	22.4316	21.8895	22.5597	22.781	23.1578	22.0216	22.9088	22.4988	22.6932	21.8959	22.6679	21.2379	22.5005	23.8677	372510000	20	3	33.7	+	2.19266	3.0659		NaN	NaN		NaN	NaN	J3QS48;I3L295;J3KT75;J3QW43;J3QRD5;Q9H3L2;Q1HDL3;A0A087WV81;O75352;J3KSI4;I3L1D2;I3L4E0;J3KTK8;J3QQZ4;I3L405;I3L261	J3QS48;I3L295;J3KT75;J3QW43;J3QRD5;Q9H3L2;Q1HDL3;A0A087WV81;O75352;J3KSI4;I3L1D2;I3L4E0;J3KTK8;J3QQZ4	Mannose-P-dolichol utilization defect 1 protein	MPDU1;HBEBP2BPA	10.978	dolichol-linked oligosaccharide biosynthetic process [GO:0006488];oligosaccharide biosynthetic process [GO:0009312];protein folding [GO:0006457];transport [GO:0006810]		endoplasmic reticulum [GO:0005783];endoplasmic reticulum membrane [GO:0005789];extracellular exosome [GO:0070062];integral component of membrane [GO:0016021];membrane [GO:0016020];mitochondrion [GO:0005739];endoplasmic reticulum [GO:0005783];integral component of membrane [GO:0016021];mitochondrion [GO:0005739];endoplasmic reticulum [GO:0005783];integral component of membrane [GO:0016021];mitocho…	GO:0006488;GO:0005783;GO:0005789;GO:0070062;GO:0016021;GO:0016020;GO:0005739;GO:0009312;GO:0006457;GO:0006810;GO:0005783;GO:0016021;GO:0005739;GO:0005783;GO:0016021;GO:0005739;GO:0005783;GO:0005739;GO:0005783;GO:0005739;GO:0005783;GO:0005739;GO:0005783;GO:0005739;GO:0016021;GO:0005783;GO:0016021;GO:0005739
25.2636	24.7758	25.1634	21.9909	21.9726	24.1888	26.698	26.761	26.4431	26.8988	26.7837	26.4749	26.8216	26.9091	27.2528	27.1001	26.9468	26.0655	26.815	26.7153	1156400000	72	14	17.6	+	2.69947	-2.36088		0.206164	0.0851002		0.891883	-0.38525	A0A087WVM4;B7ZM99;Q6UB35;H0Y327;Q4VXM0;Q5JYA8;Q5JYA3;Q4VXM1;Q4VXV2	A0A087WVM4;B7ZM99;Q6UB35	Monofunctional C1-tetrahydrofolate synthase, mitochondrial	MTHFD1L	99.31	embryonic neurocranium morphogenesis [GO:0048702];embryonic viscerocranium morphogenesis [GO:0048703];folic acid-containing compound biosynthetic process [GO:0009396];folic acid-containing compound metabolic process [GO:0006760];folic acid metabolic process [GO:0046655];formate metabolic process [GO:0015942];neural tube closure [GO:0001843];one-carbon metabolic process [GO:0006730];oxidation-redu…	ATP binding [GO:0005524];formate-tetrahydrofolate ligase activity [GO:0004329];protein homodimerization activity [GO:0042803];ATP binding [GO:0005524];formate-tetrahydrofolate ligase activity [GO:0004329];methylenetetrahydrofolate dehydrogenase (NADP+) activity [GO:0004488];methylenetetrahydrofolate dehydrogenase (NADP+) activity [GO:0004488];ATP binding [GO:0005524];formate-tetrahydrofolate liga…	membrane [GO:0016020];mitochondrial matrix [GO:0005759];mitochondrion [GO:0005739]	GO:0005524;GO:0048702;GO:0048703;GO:0046655;GO:0009396;GO:0006760;GO:0015942;GO:0004329;GO:0016020;GO:0005759;GO:0005739;GO:0001843;GO:0006730;GO:0055114;GO:0042803;GO:0044281;GO:0035999;GO:0046653;GO:0006766;GO:0006767;GO:0005524;GO:0048702;GO:0048703;GO:0009396;GO:0004329;GO:0004488;GO:0001843;GO:0009396;GO:0004488;GO:0005524;GO:0009396;GO:0004329;GO:0005524;GO:0009396;GO:0004329;GO:0009396;GO:…
25.2787	25.3796	24.767	21.7661	22.1455	23.1549	21.0586	21.6497	22.5878	22.6091	22.2955	24.8727	21.5006	21.397	22.0217	21.8479	23.0279	22.356	22.3108	22.2144	108520000	20	5	16.1	+	1.41064	-2.11626		NaN	NaN		NaN	NaN	A0A087WW14;Q0VDG4;F8W0M9;C9JID8;F8WBX0;C9JNS3;H9KVC8	A0A087WW14;Q0VDG4;F8W0M9;C9JID8	Secernin-3	SCRN3	49.154	exocytosis [GO:0006887]	dipeptidase activity [GO:0016805];dipeptidase activity [GO:0016805];dipeptidase activity [GO:0016805];dipeptidase activity [GO:0016805]	cell [GO:0005623]	GO:0005623;GO:0016805;GO:0006887;GO:0016805;GO:0016805;GO:0016805
21.9644	23.8316	22.4263	24.6551	25.3761	24.9675	21.9831	22.7104	23.0214	24.93	25.1526	25.3039	23.6954	24.5673	24.874	22.9658	24.6172	24.3853	24.1292	24.3686	274010000	34	9	13.8	+	2.00241	1.99573	+	2.41851	2.937		0.569021	0.889081	A0A087WZZ5;Q13435;E9PPJ0;E9PJ04;H0YCG1;E9PJT3;H0YEX5;E9PIL8	A0A087WZZ5;Q13435;E9PPJ0	Splicing factor 3B subunit 2	SF3B2	97.584	gene expression [GO:0010467];mRNA processing [GO:0006397];mRNA splicing, via spliceosome [GO:0000398];RNA splicing [GO:0008380];viral process [GO:0016032]	poly(A) RNA binding [GO:0044822]	catalytic step 2 spliceosome [GO:0071013];nucleoplasm [GO:0005654];precatalytic spliceosome [GO:0071011];spliceosomal complex [GO:0005681];U12-type spliceosomal complex [GO:0005689];U2 snRNP [GO:0005686];U2-type spliceosomal complex [GO:0005684];nucleus [GO:0005634];nucleoplasm [GO:0005654]	GO:0008380;GO:0005689;GO:0005686;GO:0005684;GO:0071013;GO:0010467;GO:0006397;GO:0000398;GO:0005654;GO:0044822;GO:0071011;GO:0005681;GO:0016032;GO:0005634;GO:0005654
21.4796	21.824	21.9086	25.544	25.8714	26.2259	24.7968	24.9181	24.7359	21.8052	22.2286	21.5671	24.545	24.9634	24.4389	25.1141	24.8065	24.6815	24.3537	24.9244	474820000	40	9	17	+	3.20343	2.95718	+	2.63421	-2.2651		0.13704	-0.0738249	A0A0C4DGX4;Q13616	A0A0C4DGX4;Q13616	Cullin-1	CUL1	87.387	anaphase-promoting complex-dependent proteasomal ubiquitin-dependent protein catabolic process [GO:0031145];cell cycle arrest [GO:0007050];cell proliferation [GO:0008283];circadian rhythm [GO:0007623];Fc-epsilon receptor signaling pathway [GO:0038095];G1/S transition of mitotic cell cycle [GO:0000082];G2/M transition of mitotic cell cycle [GO:0000086];innate immune response [GO:0045087];intrinsic…	ubiquitin protein ligase binding [GO:0031625]	cullin-RING ubiquitin ligase complex [GO:0031461];cytosol [GO:0005829];nucleoplasm [GO:0005654];Parkin-FBXW7-Cul1 ubiquitin ligase complex [GO:1990452];SCF ubiquitin ligase complex [GO:0019005];cullin-RING ubiquitin ligase complex [GO:0031461]	GO:0038095;GO:0000082;GO:0000086;GO:0002755;GO:0002756;GO:0038061;GO:0007219;GO:1990452;GO:0019005;GO:0031146;GO:0050852;GO:0035666;GO:0031145;GO:0007050;GO:0008283;GO:0007623;GO:0031461;GO:0005829;GO:0045087;GO:0097193;GO:0000278;GO:0008285;GO:0005654;GO:0009887;GO:0051437;GO:0006513;GO:0016567;GO:0042787;GO:0051439;GO:0002223;GO:0051403;GO:0034166;GO:0034134;GO:0034138;GO:0034142;GO:0034146;GO:…
22.496	22.1329	22.4482	25.9034	24.9853	24.8795	21.2976	22.4608	22.7385	21.9845	22.8927	22.0523	21.8104	22.2021	22.793	22.4512	22.5129	22.6333	22.0138	23.0436	36956000	18	14	18.3	+	1.67956	2.27454		NaN	NaN		NaN	NaN	A0A0J9YXN7;Q96Q06	A0A0J9YXN7;Q96Q06	Perilipin-4	PLIN4	136.02			cytoplasm [GO:0005737];intracellular membrane-bounded organelle [GO:0043231];lipid particle [GO:0005811];plasma membrane [GO:0005886]	GO:0005737;GO:0043231;GO:0005811;GO:0005886
22.7651	21.6026	21.5889	28.2878	27.7262	27.7889	22.2815	23.1796	21.0026	27.8787	27.8996	27.848	22.612	21.763	22.4985	23.5814	22.1847	22.7785	21.9866	22.2705	430930000	8	3	2.2	+	4.2755	5.14816	+	7.37576	4.64837		NaN	NaN	B1AKD8;Q5TZA2;A0A087WW81	B1AKD8;Q5TZA2;A0A087WW81	Rootletin	CROCC	149.06	cell cycle [GO:0007049];cell projection organization [GO:0030030];centriole-centriole cohesion [GO:0010457];centrosome organization [GO:0051297];ciliary basal body organization [GO:0032053];epithelial structure maintenance [GO:0010669];establishment of organelle localization [GO:0051656];photoreceptor cell maintenance [GO:0045494];protein localization [GO:0008104];protein localization to organell…	kinesin binding [GO:0019894];structural molecule activity [GO:0005198]	actin cytoskeleton [GO:0015629];centriole [GO:0005814];centrosome [GO:0005813];ciliary rootlet [GO:0035253];cytoplasm [GO:0005737];extracellular exosome [GO:0070062];photoreceptor inner segment [GO:0001917];plasma membrane [GO:0005886];ciliary rootlet [GO:0035253];ciliary rootlet [GO:0035253]	GO:0015629;GO:0007049;GO:0030030;GO:0005814;GO:0010457;GO:0005813;GO:0051297;GO:0032053;GO:0035253;GO:0005737;GO:0010669;GO:0051656;GO:0070062;GO:0019894;GO:0045494;GO:0001917;GO:0005886;GO:0008104;GO:0033365;GO:0005198;GO:0051297;GO:0035253;GO:0051297;GO:0035253
23.0206	23.1696	22.2084	26.0363	26.1826	25.8838	21.6388	22.6252	22.3639	28.3712	28.4287	28.3937	22.2937	22.2667	21.6706	23.0139	26.5997	27.3991	26.4554	26.6604	916070000	45	11	33.2	+	4.66556	2.8428	+	3.89285	5.95963	+	4.34492	4.92512	B5MDU6;Q9H6V9;A0A0A0MSH6;B5MCU4;C9JUM0;C9JHU6;B5MCE2;B4DRG3;D3YTH1	B5MDU6;Q9H6V9;A0A0A0MSH6;B5MCU4;C9JUM0	UPF0554 protein C2orf43	LDAH;C2orf43	42.668	lipid catabolic process [GO:0016042];lipid storage [GO:0019915]	lipase activity [GO:0016298]	endoplasmic reticulum [GO:0005783];lipid particle [GO:0005811]	GO:0005783;GO:0016298;GO:0016042;GO:0005811;GO:0019915
25.5848	22.1901	23.2125	25.8433	26.2188	26.2408	23.3575	22.3599	21.1374	22.1901	23.153	21.9557	22.1966	21.919	25.7693	25.6356	22.8012	25.1816	25.6104	25.3228	572470000	25	2	22.4	+	1.17765	2.43192		NaN	NaN		NaN	NaN	C9JJV6;C9JZL8;C9J5M0;C9JC07;Q96S97	C9JJV6;C9JZL8;C9J5M0;C9JC07;Q96S97	Myeloid-associated differentiation marker	MYADM	15.935	establishment of endothelial barrier [GO:0061028];membrane raft organization [GO:0031579];negative regulation of actin filament polymerization [GO:0030837];negative regulation of gene expression [GO:0010629];negative regulation of heterotypic cell-cell adhesion [GO:0034115];negative regulation of protein kinase C signaling [GO:0090038];negative regulation of protein phosphorylation [GO:0001933];p…		cell-cell junction [GO:0005911];cortical actin cytoskeleton [GO:0030864];extracellular exosome [GO:0070062];integral component of membrane [GO:0016021];membrane raft [GO:0045121];plasma membrane [GO:0005886];ruffle [GO:0001726];integral component of membrane [GO:0016021];integral component of membrane [GO:0016021];integral component of membrane [GO:0016021];integral component of membrane [GO:0016…	GO:0005911;GO:0030864;GO:0061028;GO:0070062;GO:0016021;GO:0045121;GO:0031579;GO:0030837;GO:0010629;GO:0034115;GO:0090038;GO:0001933;GO:0005886;GO:0030335;GO:1900026;GO:0072661;GO:0001726;GO:0016021;GO:0016021;GO:0016021;GO:0016021
22.6766	22.6238	22.3395	24.2503	24.4609	24.1787	22.6376	21.941	20.948	22.5195	23.1186	21.5273	23.034	24.2152	24.6205	23.9475	22.2226	21.4798	22.1306	23.9973	215600000	17	2	18.9	+	3.73692	1.38865		NaN	NaN		NaN	NaN	C9JNP9;Q92890;C9J6N9;C9IZG3	C9JNP9;Q92890;C9J6N9;C9IZG3	Ubiquitin fusion degradation protein 1 homolog	UFD1L	17.553	DNA repair [GO:0006281];ER-associated misfolded protein catabolic process [GO:0071712];error-free translesion synthesis [GO:0070987];retrograde protein transport, ER to cytosol [GO:0030970];skeletal system development [GO:0001501];translesion synthesis [GO:0019985];ubiquitin-dependent protein catabolic process [GO:0006511];ubiquitin-dependent protein catabolic process [GO:0006511];ubiquitin-depen…	ubiquitin-specific protease activity [GO:0004843]	cytosol [GO:0005829];nucleoplasm [GO:0005654];nucleus [GO:0005634];UFD1-NPL4 complex [GO:0036501];VCP-NPL4-UFD1 AAA ATPase complex [GO:0034098]	GO:0006281;GO:0071712;GO:0036501;GO:0034098;GO:0005829;GO:0070987;GO:0005654;GO:0005634;GO:0030970;GO:0001501;GO:0019985;GO:0006511;GO:0004843;GO:0006511;GO:0006511;GO:0006511
21.315	22.4959	22.3701	24.8617	24.7119	24.9111	21.1891	25.0942	24.7379	22.6054	23.1497	21.8018	23.8342	22.7056	22.4467	23.3079	21.3926	21.7048	21.9662	22.2136	296740000	15	4	15.9	+	2.67048	2.42073		NaN	NaN		NaN	NaN	E7EMM4;Q13510	E7EMM4;Q13510	Acid ceramidase;Acid ceramidase subunit alpha;Acid ceramidase subunit beta	ASAH1	41.796	ceramide metabolic process [GO:0006672];glycosphingolipid metabolic process [GO:0006687];small molecule metabolic process [GO:0044281];sphingolipid metabolic process [GO:0006665]	catalytic activity [GO:0003824];ceramidase activity [GO:0017040]	extracellular exosome [GO:0070062];extracellular space [GO:0005615];lysosomal lumen [GO:0043202]	GO:0003824;GO:0017040;GO:0006672;GO:0070062;GO:0005615;GO:0006687;GO:0043202;GO:0044281;GO:0006665
22.6425	23.2214	21.9066	25.0714	25.1827	24.8365	22.5177	22.3305	21.9168	22.718	21.7469	22.8774	22.5605	21.8334	21.4001	22.3182	21.2703	22.635	22.117	22.7992	30904000	6	3	21.5	+	3.321	1.73144		NaN	NaN		NaN	NaN	E7ETY7;Q8TED1	E7ETY7;Q8TED1	Glutathione peroxidase;Probable glutathione peroxidase 8	GPX8	18.09	cellular oxidant detoxification [GO:0098869];response to reactive oxygen species [GO:0000302];response to oxidative stress [GO:0006979]	glutathione peroxidase activity [GO:0004602];peroxidase activity [GO:0004601];glutathione peroxidase activity [GO:0004602]	endoplasmic reticulum lumen [GO:0005788];integral component of membrane [GO:0016021]	GO:0098869;GO:0005788;GO:0004602;GO:0016021;GO:0004601;GO:0000302;GO:0004602;GO:0006979
22.1554	20.7897	21.8333	24.4898	24.8834	26.0242	26.7722	26.8594	26.2195	26.0431	26.0058	25.9247	25.8641	25.9987	26.3897	25.992	26.0931	25.78	26.1768	24.6618	827170000	141	35	14.4	+	1.78771	2.15678		1.4314	-0.625833		0.472223	-0.3832	H0Y4W2;F2Z2U4;Q9Y4A5	H0Y4W2;F2Z2U4;Q9Y4A5	Transformation/transcription domain-associated protein	TRRAP	405.8	chromatin organization [GO:0006325];DNA repair [GO:0006281];histone acetylation [GO:0016573];histone deubiquitination [GO:0016578];histone H2A acetylation [GO:0043968];histone H4 acetylation [GO:0043967];mitotic cell cycle checkpoint [GO:0007093];phosphorylation [GO:0016310];regulation of transcription, DNA-templated [GO:0006355];transcription, DNA-templated [GO:0006351]	kinase activity [GO:0016301];phosphotransferase activity, alcohol group as acceptor [GO:0016773];transcription coactivator activity [GO:0003713];transcription cofactor activity [GO:0003712];phosphotransferase activity, alcohol group as acceptor [GO:0016773];phosphotransferase activity, alcohol group as acceptor [GO:0016773]	Golgi apparatus [GO:0005794];NuA4 histone acetyltransferase complex [GO:0035267];nucleoplasm [GO:0005654];nucleus [GO:0005634];PCAF complex [GO:0000125];STAGA complex [GO:0030914];Swr1 complex [GO:0000812];transcription factor TFTC complex [GO:0033276];Golgi apparatus [GO:0005794];nucleoplasm [GO:0005654]	GO:0006281;GO:0005794;GO:0035267;GO:0000125;GO:0030914;GO:0000812;GO:0006325;GO:0043968;GO:0043967;GO:0016573;GO:0016578;GO:0016301;GO:0007093;GO:0005654;GO:0005634;GO:0016310;GO:0016773;GO:0006355;GO:0003713;GO:0003712;GO:0033276;GO:0006351;GO:0005794;GO:0005654;GO:0016773;GO:0016773
22.5413	23.2402	22.7699	26.9946	26.7529	27.1355	22.1409	26.7657	26.8299	25.4851	22.1131	22.0041	21.6756	22.1115	23.0998	21.2682	23.0947	22.1093	22.3171	22.1537	400910000	12	2	8.5	+	3.77277	3.7668		NaN	NaN		NaN	NaN	G3V434;G3V2L5;G3V4A6;G3XA86;Q9Y2Z9	G3V434;G3V2L5;G3V4A6;G3XA86;Q9Y2Z9	Ubiquinone biosynthesis monooxygenase COQ6, mitochondrial	COQ6	22.145	secondary metabolite biosynthetic process [GO:0044550];small molecule metabolic process [GO:0044281];ubiquinone biosynthetic process [GO:0006744];ubiquinone biosynthetic process [GO:0006744]	FAD binding [GO:0071949];monooxygenase activity [GO:0004497];oxidoreductase activity, acting on paired donors, with incorporation or reduction of molecular oxygen, NAD(P)H as one donor, and incorporation of one atom of oxygen [GO:0016709];oxidoreductase activity [GO:0016491];oxidoreductase activity [GO:0016491];FAD binding [GO:0071949];oxidoreductase activity, acting on paired donors, with incorp…	cell projection [GO:0042995];Golgi apparatus [GO:0005794];mitochondrial inner membrane [GO:0005743];mitochondrion [GO:0005739]	GO:0071949;GO:0005794;GO:0042995;GO:0005743;GO:0005739;GO:0004497;GO:0016709;GO:0044550;GO:0044281;GO:0006744;GO:0016491;GO:0016491;GO:0071949;GO:0016709;GO:0006744
22.282	22.9397	22.6522	25.5774	25.1888	24.7181	25.2118	25.5437	25.547	25.4336	26.1011	26.0382	25.5604	25.4698	25.2798	24.7893	24.6597	25.1866	24.937	25.865	483340000	45	6	19.4	+	2.43464	2.015		0.816608	0.423467		0.137552	-0.112751	G3XAC6;Q14498;A0A0U1RQH7;H0Y4X3;A0A0U1RQW2;Q5QP23;Q5QP22;F8WF24;F2Z3E6;F2Z2Z5;A0A087X122;F8WF73;A8MYG5;G3V5Z6;H0YJJ3;G3XAP0;Q86U06	G3XAC6;Q14498;A0A0U1RQH7;H0Y4X3;A0A0U1RQW2;Q5QP23	RNA-binding protein 39	RBM39	48.023	mRNA processing [GO:0006397];mRNA processing [GO:0006397];regulation of transcription, DNA-templated [GO:0006355];RNA processing [GO:0006396];RNA splicing [GO:0008380];transcription, DNA-templated [GO:0006351];mRNA processing [GO:0006397];mRNA processing [GO:0006397];mRNA processing [GO:0006397];mRNA processing [GO:0006397]	nucleotide binding [GO:0000166];RNA binding [GO:0003723];nucleotide binding [GO:0000166];poly(A) RNA binding [GO:0044822];nucleotide binding [GO:0000166];RNA binding [GO:0003723];nucleotide binding [GO:0000166];RNA binding [GO:0003723];nucleotide binding [GO:0000166];nucleotide binding [GO:0000166];RNA binding [GO:0003723];nucleic acid binding [GO:0003676];nucleotide binding [GO:0000166];nucleoti…	membrane [GO:0016020];nucleus [GO:0005634];microtubule cytoskeleton [GO:0015630];microtubule organizing center [GO:0005815];nuclear speck [GO:0016607];nucleoplasm [GO:0005654];nucleus [GO:0005634];nucleus [GO:0005634];nucleus [GO:0005634];nucleus [GO:0005634]	GO:0003723;GO:0006397;GO:0016020;GO:0000166;GO:0005634;GO:0006396;GO:0008380;GO:0006397;GO:0015630;GO:0005815;GO:0016607;GO:0005654;GO:0000166;GO:0044822;GO:0006355;GO:0006351;GO:0003723;GO:0006397;GO:0000166;GO:0005634;GO:0003723;GO:0006397;GO:0000166;GO:0005634;GO:0000166;GO:0003723;GO:0006397;GO:0000166;GO:0005634;GO:0003676;GO:0000166;GO:0003723;GO:0006397;GO:0000166;GO:0005634;GO:0003676;GO:…
21.8305	22.3298	22.5734	25.8634	25.6509	25.6094	26.2466	26.4449	25.9325	26.1203	25.8781	26.0423	22.0332	22.4591	23.2257	22.6002	22.5879	23.786	22.7516	22.6214	208580000	12	2	15.2	+	2.28885	2.16201		0.515853	-0.194434		NaN	NaN	H0Y5B4;H7BZ11;J3KQN4;Q969Q0;P83881;R4GN19	H0Y5B4;H7BZ11;J3KQN4;Q969Q0;P83881;R4GN19	60S ribosomal protein L36a-like;60S ribosomal protein L36a	RPL36A;RPL36A-HNRNPH2;RPL36AL	13.228	cellular nitrogen compound metabolic process [GO:0034641];cellular protein metabolic process [GO:0044267];cytoplasmic translation [GO:0002181];gene expression [GO:0010467];nuclear-transcribed mRNA catabolic process, nonsense-mediated decay [GO:0000184];selenium compound metabolic process [GO:0001887];selenocysteine metabolic process [GO:0016259];small molecule metabolic process [GO:0044281];SRP-d…	poly(A) RNA binding [GO:0044822];structural constituent of ribosome [GO:0003735];structural constituent of ribosome [GO:0003735];structural constituent of ribosome [GO:0003735];structural constituent of ribosome [GO:0003735];structural constituent of ribosome [GO:0003735];structural constituent of ribosome [GO:0003735]	cytosol [GO:0005829];cytosolic large ribosomal subunit [GO:0022625];ribosome [GO:0005840];cytosolic large ribosomal subunit [GO:0022625];ribosome [GO:0005840];cytosolic large ribosomal subunit [GO:0022625];ribosome [GO:0005840];ribosome [GO:0005840]	GO:0006614;GO:0034641;GO:0044267;GO:0002181;GO:0005829;GO:0022625;GO:0010467;GO:0000184;GO:0044822;GO:0005840;GO:0001887;GO:0016259;GO:0044281;GO:0003735;GO:0006412;GO:0006414;GO:0006413;GO:0006415;GO:0019058;GO:0016032;GO:0019083;GO:0022625;GO:0003735;GO:0006412;GO:0005840;GO:0003735;GO:0006412;GO:0022625;GO:0003735;GO:0006412;GO:0005840;GO:0003735;GO:0006412;GO:0005840;GO:0003735;GO:0006412
22.3497	22.2954	20.7768	25.4713	25.4079	25.4816	25.7293	25.9799	25.7902	25.695	25.2876	25.2695	24.8667	25.5798	25.7141	25.8546	26.4096	26.0851	26.0371	24.7827	721590000	30	3	19.1	+	1.99001	1.95658		1.23517	-0.415766		0.328878	0.324825	H0YMI6;H0YMA1;H0YMZ1;H0YL69;P25789;H0YLS6;H0YLC2;H0YKT8;H0YN18;H0YKS0	H0YMI6;H0YMA1;H0YMZ1;H0YL69;P25789;H0YLS6;H0YLC2;H0YKT8;H0YN18	Proteasome subunit alpha type;Proteasome subunit alpha type-4;Proteasome subunit beta type	PSMA4	20.526	activation of MAPKK activity [GO:0000186];anaphase-promoting complex-dependent proteasomal ubiquitin-dependent protein catabolic process [GO:0031145];antigen processing and presentation of exogenous peptide antigen via MHC class I [GO:0042590];antigen processing and presentation of exogenous peptide antigen via MHC class I, TAP-dependent [GO:0002479];antigen processing and presentation of peptide…	threonine-type endopeptidase activity [GO:0004298];threonine-type endopeptidase activity [GO:0004298];threonine-type endopeptidase activity [GO:0004298];threonine-type endopeptidase activity [GO:0004298];threonine-type endopeptidase activity [GO:0004298];threonine-type endopeptidase activity [GO:0004298];threonine-type endopeptidase activity [GO:0004298];threonine-type endopeptidase activity [GO:…	cytoplasm [GO:0005737];cytoplasmic mRNA processing body [GO:0000932];cytosol [GO:0005829];extracellular exosome [GO:0070062];intracellular membrane-bounded organelle [GO:0043231];nucleoplasm [GO:0005654];nucleus [GO:0005634];proteasome complex [GO:0000502];proteasome core complex [GO:0005839];proteasome core complex, alpha-subunit complex [GO:0019773];proteasome core complex [GO:0005839];cytoplas…	GO:0006977;GO:0038095;GO:0000082;GO:0000165;GO:0038061;GO:0007265;GO:0050852;GO:0000186;GO:0031145;GO:0042590;GO:0002479;GO:0002474;GO:0006915;GO:0007411;GO:0034641;GO:0005737;GO:0000932;GO:0005829;GO:0007173;GO:0070062;GO:0008543;GO:0010467;GO:0045087;GO:0008286;GO:0043231;GO:0000278;GO:0043066;GO:0090090;GO:0051436;GO:0048011;GO:0005654;GO:0005634;GO:0006595;GO:0090263;GO:0051437;GO:0012501;GO:…
22.9755	24.7082	24.0302	26.8542	27.7994	26.9163	21.8933	22.7433	23.0797	30.8129	30.1045	31.2787	22.2946	22.7024	23.1807	22.0653	28.2552	28.471	28.2759	28.6589	3677900000	170	28	44.1	+	2.32742	3.26527	+	3.91478	7.54982	+	5.15399	6.14781	H7BXI1;A0A087WXU3;A0FGR8	H7BXI1;A0A087WXU3;A0FGR8	Extended synaptotagmin-2	ESYT2	98.008	endocytosis [GO:0006897];lipid transport [GO:0006869]	calcium-dependent phospholipid binding [GO:0005544];calcium ion binding [GO:0005509];identical protein binding [GO:0042802];phosphatidylcholine binding [GO:0031210];phosphatidylethanolamine binding [GO:0008429];phosphatidylinositol binding [GO:0035091];lipid binding [GO:0008289];lipid binding [GO:0008289]	extrinsic component of cytoplasmic side of plasma membrane [GO:0031234];integral component of plasma membrane [GO:0005887];intrinsic component of endoplasmic reticulum membrane [GO:0031227];membrane [GO:0016020];organelle membrane contact site [GO:0044232];integral component of membrane [GO:0016021];integral component of membrane [GO:0016021]	GO:0005509;GO:0005544;GO:0006897;GO:0031234;GO:0042802;GO:0005887;GO:0031227;GO:0006869;GO:0016020;GO:0044232;GO:0031210;GO:0008429;GO:0035091;GO:0016021;GO:0008289;GO:0016021;GO:0008289
22.3534	22.2388	22.4219	24.5755	24.091	24.6339	24.3791	24.2797	24.4823	24.5274	24.4449	24.4096	24.5886	24.1238	24.1305	24.5937	24.7255	24.6005	24.259	24.6994	352840000	41	11	17.3	+	2.81099	1.55464		0.517218	0.0802663		0.579588	0.21195	I3L0N3;P46459;I3L2G1;I3L0L3;K7EQD6;I3L338;I3L4Q9	I3L0N3;P46459	Vesicle-fusing ATPase	NSF	82.091	cellular protein metabolic process [GO:0044267];COPII vesicle coating [GO:0048208];ER to Golgi vesicle-mediated transport [GO:0006888];exocytosis [GO:0006887];Golgi to plasma membrane protein transport [GO:0043001];Golgi vesicle docking [GO:0048211];intracellular protein transport [GO:0006886];intra-Golgi vesicle-mediated transport [GO:0006891];membrane organization [GO:0061024];plasma membrane f…	ATPase activity [GO:0016887];ATPase activity, coupled [GO:0042623];ATP binding [GO:0005524];metal ion binding [GO:0046872];PDZ domain binding [GO:0030165];protein complex binding [GO:0032403];protein kinase binding [GO:0019901];Rab GTPase binding [GO:0017137];syntaxin-1 binding [GO:0017075];ATP binding [GO:0005524];ATP binding [GO:0005524]	cytoplasm [GO:0005737];cytosol [GO:0005829];dendritic shaft [GO:0043198];extracellular exosome [GO:0070062];Golgi membrane [GO:0000139];Golgi stack [GO:0005795];lysosomal membrane [GO:0005765];myelin sheath [GO:0043209];plasma membrane [GO:0005886];postsynaptic density [GO:0014069];cytoplasm [GO:0005737]	GO:0005524;GO:0016887;GO:0042623;GO:0048208;GO:0006888;GO:0000139;GO:0005795;GO:0043001;GO:0048211;GO:0030165;GO:0017137;GO:0044267;GO:0005737;GO:0005829;GO:0043198;GO:0006887;GO:0070062;GO:0006891;GO:0006886;GO:0005765;GO:0061024;GO:0046872;GO:0043209;GO:0005886;GO:0045026;GO:0045732;GO:0001921;GO:0043687;GO:0014069;GO:0006813;GO:0018279;GO:0032403;GO:0019901;GO:0017157;GO:0007268;GO:0017075;GO:…
23.0026	21.9858	22.5647	25.9771	25.9784	25.5913	25.9634	25.8645	25.7147	26.3212	25.9766	26.0482	26.3254	25.95	26.4148	26.2792	26.8074	26.4575	26.3897	25.9453	1173500000	80	13	13.6	+	2.15229	3.10456		0.98485	0.2678		0.328697	0.157625	I3L2C7;P57678;I3L4A4;I3L399;E7EN12;I3L4M4;I3L1J7	I3L2C7;P57678	Gem-associated protein 4	GEMIN4	118.82	gene expression [GO:0010467];ncRNA metabolic process [GO:0034660];rRNA processing [GO:0006364];spliceosomal snRNP assembly [GO:0000387]		cytoplasm [GO:0005737];cytosol [GO:0005829];extracellular exosome [GO:0070062];Gemini of coiled bodies [GO:0097504];membrane [GO:0016020];nucleolus [GO:0005730];nucleoplasm [GO:0005654];nucleus [GO:0005634];small nuclear ribonucleoprotein complex [GO:0030532];SMN complex [GO:0032797];SMN-Sm protein complex [GO:0034719];cytoplasm [GO:0005737];nucleus [GO:0005634];cytoplasm [GO:0005737];nucleus [GO…	GO:0097504;GO:0032797;GO:0034719;GO:0005737;GO:0005829;GO:0070062;GO:0010467;GO:0016020;GO:0034660;GO:0005730;GO:0005654;GO:0005634;GO:0006364;GO:0030532;GO:0000387;GO:0005737;GO:0005634;GO:0005737;GO:0005634;GO:0005737;GO:0005634;GO:0005737;GO:0005634
22.3367	25.9382	25.4607	28.9481	28.6409	27.94	22.7495	22.3195	22.548	27.9531	28.5519	29.0142	22.4116	24.9158	21.5779	22.2015	28.1438	28.7653	29.3092	28.4278	3019700000	56	4	53.3	+	1.59131	3.87944	+	3.37885	5.51062	+	3.60623	5.83965	J3KNF8;H3BUX2;O43169;D6RFH4	J3KNF8;H3BUX2;O43169;D6RFH4	Cytochrome b5 type B	CYB5B	16.694	oxidation-reduction process [GO:0055114]	heme binding [GO:0020037];metal ion binding [GO:0046872];enzyme activator activity [GO:0008047];heme binding [GO:0020037];metal ion binding [GO:0046872];heme binding [GO:0020037];metal ion binding [GO:0046872];heme binding [GO:0020037];metal ion binding [GO:0046872]	integral component of membrane [GO:0016021];membrane [GO:0016020];mitochondrial outer membrane [GO:0005741];integral component of membrane [GO:0016021];mitochondrial inner membrane [GO:0005743];mitochondrial outer membrane [GO:0005741]	GO:0020037;GO:0016021;GO:0016020;GO:0046872;GO:0005741;GO:0055114;GO:0008047;GO:0020037;GO:0016021;GO:0046872;GO:0005743;GO:0005741;GO:0020037;GO:0046872;GO:0020037;GO:0046872
22.891	23.524	22.8932	25.5828	25.5997	25.7646	22.5201	23.1575	21.9015	21.9014	21.2015	21.5589	26.1635	26.2368	26.5633	26.3557	25.851	25.7696	26.1517	25.9294	869810000	52	7	29.8	+	2.79671	2.05921		NaN	NaN		1.82408	-0.4044	O15143;C9JBJ7;C9K057;C9J4Z7;F8VXW2;C9JEY1;C9JQM8;C9JFG9;C9J6C8;C9JTT6	O15143	Actin-related protein 2/3 complex subunit 1B	ARPC1B	40.949	Arp2/3 complex-mediated actin nucleation [GO:0034314];axon guidance [GO:0007411];ephrin receptor signaling pathway [GO:0048013];Fc-gamma receptor signaling pathway involved in phagocytosis [GO:0038096];innate immune response [GO:0045087];movement of cell or subcellular component [GO:0006928];small GTPase mediated signal transduction [GO:0007264];Arp2/3 complex-mediated actin nucleation [GO:003431…	structural constituent of cytoskeleton [GO:0005200]	actin cytoskeleton [GO:0015629];Arp2/3 protein complex [GO:0005885];cytosol [GO:0005829];extracellular exosome [GO:0070062];focal adhesion [GO:0005925];Arp2/3 protein complex [GO:0005885];Arp2/3 protein complex [GO:0005885];Arp2/3 protein complex [GO:0005885];Arp2/3 protein complex [GO:0005885];Arp2/3 protein complex [GO:0005885];Arp2/3 protein complex [GO:0005885];Arp2/3 protein complex [GO:0005…	GO:0034314;GO:0005885;GO:0038096;GO:0015629;GO:0007411;GO:0005829;GO:0048013;GO:0070062;GO:0005925;GO:0045087;GO:0006928;GO:0007264;GO:0005200;GO:0034314;GO:0005885;GO:0034314;GO:0005885;GO:0034314;GO:0005885;GO:0034314;GO:0005885;GO:0034314;GO:0005885;GO:0034314;GO:0005885;GO:0034314;GO:0005885;GO:0034314;GO:0005885;GO:0034314;GO:0005885
25.8536	25.9273	26.2942	21.8261	21.8081	23.3825	26.511	26.2663	26.523	26.3773	26.4127	26.6	27.3372	27.0093	27.1781	26.807	27.0071	26.7023	26.7951	26.7542	1480200000	87	17	34.8	+	3.28774	-3.34		0.0988156	0.0299002		1.05382	-0.268226	O43252	O43252	Bifunctional 3-phosphoadenosine 5-phosphosulfate synthase 1;Sulfate adenylyltransferase;Adenylyl-sulfate kinase	PAPSS1	70.832	3'-phosphoadenosine 5'-phosphosulfate biosynthetic process [GO:0050428];3'-phosphoadenosine 5'-phosphosulfate metabolic process [GO:0050427];carbohydrate metabolic process [GO:0005975];cellular nitrogen compound metabolic process [GO:0034641];glycosaminoglycan metabolic process [GO:0030203];selenium compound metabolic process [GO:0001887];skeletal system development [GO:0001501];small molecule me…	adenylylsulfate kinase activity [GO:0004020];ATP binding [GO:0005524];nucleotidyltransferase activity [GO:0016779];sulfate adenylyltransferase (ATP) activity [GO:0004781]	cytosol [GO:0005829]	GO:0050428;GO:0050427;GO:0005524;GO:0004020;GO:0005975;GO:0034641;GO:0005829;GO:0030203;GO:0016779;GO:0001887;GO:0001501;GO:0044281;GO:0004781;GO:0000103;GO:0006805
22.3159	21.4535	22.9391	24.5102	24.5543	24.7302	22.7167	22.1754	21.9975	22.081	22.6311	21.5702	22.9148	23.8569	22.6746	23.6836	22.8811	21.7685	23.1092	22.6746	62337000	13	3	19.4	+	2.73552	1.81742		NaN	NaN		NaN	NaN	Q5SRN7;Q5SRN5;P16188;P13746;P04439	Q5SRN7;Q5SRN5;P16188;P13746;P04439	HLA class I histocompatibility antigen, A-30 alpha chain;HLA class I histocompatibility antigen, A-11 alpha chain;HLA class I histocompatibility antigen, A-3 alpha chain	HLA-A	34.211	antigen processing and presentation of exogenous peptide antigen via MHC class I [GO:0042590];antigen processing and presentation of exogenous peptide antigen via MHC class I, TAP-dependent [GO:0002479];antigen processing and presentation of exogenous peptide antigen via MHC class I, TAP-independent [GO:0002480];antigen processing and presentation of peptide antigen via MHC class I [GO:0002474];c…	beta-2-microglobulin binding [GO:0030881];peptide antigen binding [GO:0042605];TAP binding [GO:0046977];beta-2-microglobulin binding [GO:0030881];peptide antigen binding [GO:0042605];TAP binding [GO:0046977];beta-2-microglobulin binding [GO:0030881];peptide antigen binding [GO:0042605];TAP binding [GO:0046977];peptide antigen binding [GO:0042605];peptide antigen binding [GO:0042605]	cell surface [GO:0009986];early endosome membrane [GO:0031901];endoplasmic reticulum [GO:0005783];ER to Golgi transport vesicle membrane [GO:0012507];Golgi apparatus [GO:0005794];Golgi membrane [GO:0000139];integral component of lumenal side of endoplasmic reticulum membrane [GO:0071556];integral component of plasma membrane [GO:0005887];membrane [GO:0016020];MHC class I protein complex [GO:00426…	GO:0012507;GO:0005794;GO:0000139;GO:0042612;GO:0046977;GO:0042590;GO:0002479;GO:0002480;GO:0002474;GO:0030881;GO:0009986;GO:0019221;GO:0031901;GO:0005783;GO:0006955;GO:0071556;GO:0005887;GO:0060333;GO:0016020;GO:0042605;GO:0030670;GO:0005886;GO:0050776;GO:0060337;GO:0016032;GO:0012507;GO:0005794;GO:0000139;GO:0042612;GO:0046977;GO:0042590;GO:0002479;GO:0002480;GO:0002474;GO:0030881;GO:0009986;GO:…
21.9577	22.371	21.2471	25.1294	25.7989	25.7	26.7684	27.0819	26.8962	26.9106	27.1237	27.0112	25.2905	25.0457	26.3331	25.6813	24.953	25.5771	26.3279	26.0766	682880000	69	11	39.7	+	3.42769	2.81395		0.381278	0.0996666		0.133087	0.146	P04899	P04899	Guanine nucleotide-binding protein G(i) subunit alpha-2	GNAI2	40.45	activation of MAPKK activity [GO:0000186];adenosine receptor signaling pathway [GO:0001973];adenylate cyclase-inhibiting G-protein coupled receptor signaling pathway [GO:0007193];blood coagulation [GO:0007596];cell cycle [GO:0007049];cell division [GO:0051301];cell proliferation [GO:0008283];gamma-aminobutyric acid signaling pathway [GO:0007214];G-protein coupled acetylcholine receptor signaling …	G-protein beta/gamma-subunit complex binding [GO:0031683];G-protein coupled receptor binding [GO:0001664];GTPase activity [GO:0003924];GTP binding [GO:0005525];metal ion binding [GO:0046872];signal transducer activity [GO:0004871]	centrosome [GO:0005813];cytoplasm [GO:0005737];cytosol [GO:0005829];extracellular exosome [GO:0070062];extracellular vesicle [GO:1903561];heterotrimeric G-protein complex [GO:0005834];membrane [GO:0016020];membrane raft [GO:0045121];midbody [GO:0030496];nucleoplasm [GO:0005654];plasma membrane [GO:0005886]	GO:0031683;GO:0007213;GO:0001664;GO:0007186;GO:0005525;GO:0003924;GO:0000186;GO:0001973;GO:0007193;GO:0007596;GO:0007049;GO:0051301;GO:0008283;GO:0005813;GO:0005737;GO:0005829;GO:0070062;GO:1903561;GO:0007214;GO:0005834;GO:0035556;GO:0016020;GO:0045121;GO:0046872;GO:0030496;GO:0007194;GO:0050805;GO:0005654;GO:0005886;GO:0030168;GO:0008284;GO:0051924;GO:0007584;GO:0004871;GO:0007165;GO:0007268
21.5769	22.5942	22.1805	26.4419	26.1657	26.2193	26.2849	25.7277	25.7303	22.144	22.8481	21.5255	23.8508	25.4642	25.4272	26.903	25.6759	25.5399	26.0451	25.396	809910000	24	2	17.4	+	2.76978	3.21371	+	3.28712	-3.48351		0.198139	0.369932	P14174	P14174	Macrophage migration inhibitory factor	MIF	12.476	blood coagulation [GO:0007596];carboxylic acid metabolic process [GO:0019752];cell aging [GO:0007569];cell proliferation [GO:0008283];cell surface receptor signaling pathway [GO:0007166];DNA damage response, signal transduction by p53 class mediator [GO:0030330];inflammatory response [GO:0006954];innate immune response [GO:0045087];leukocyte migration [GO:0050900];negative regulation of apoptotic…	chemoattractant activity [GO:0042056];cytokine activity [GO:0005125];cytokine receptor binding [GO:0005126];dopachrome isomerase activity [GO:0004167];phenylpyruvate tautomerase activity [GO:0050178];receptor binding [GO:0005102]	cell surface [GO:0009986];cytoplasm [GO:0005737];extracellular exosome [GO:0070062];extracellular region [GO:0005576];extracellular space [GO:0005615];myelin sheath [GO:0043209];nucleoplasm [GO:0005654];vesicle [GO:0031982]	GO:0030330;GO:0007596;GO:0019752;GO:0007569;GO:0008283;GO:0009986;GO:0007166;GO:0042056;GO:0005125;GO:0005126;GO:0005737;GO:0004167;GO:0070062;GO:0005576;GO:0005615;GO:0006954;GO:0045087;GO:0050900;GO:0043209;GO:0043518;GO:0043066;GO:0090344;GO:0071157;GO:0032269;GO:0010629;GO:1902166;GO:0002906;GO:0033033;GO:0005654;GO:0050178;GO:0050918;GO:0030890;GO:0070374;GO:0043406;GO:0090238;GO:2000343;GO:…
31.1822	22.1873	23.0283	31.1073	30.584	30.6978	21.4816	21.6117	22.862	21.9614	21.2529	27.8264	20.9251	21.2892	21.584	21.9503	22.2426	21.7782	22.0119	22.5413	3231200000	15	3	10.8	+	0.858756	5.42376		NaN	NaN		NaN	NaN	P14550;V9GYG2;V9GYP9;Q5T621	P14550	Alcohol dehydrogenase [NADP(+)]	AKR1A1	36.573	aldehyde catabolic process [GO:0046185];carbohydrate metabolic process [GO:0005975];cellular aldehyde metabolic process [GO:0006081];D-glucuronate catabolic process [GO:0042840];glucose metabolic process [GO:0006006];glucuronate catabolic process to xylulose 5-phosphate [GO:0019640];glutathione derivative biosynthetic process [GO:1901687];L-ascorbic acid biosynthetic process [GO:0019853];small mo…	alditol:NADP+ 1-oxidoreductase activity [GO:0004032];electron carrier activity [GO:0009055];L-glucuronate reductase activity [GO:0047939];oxidoreductase activity [GO:0016491];oxidoreductase activity [GO:0016491];oxidoreductase activity [GO:0016491]	apical plasma membrane [GO:0016324];cytosol [GO:0005829];extracellular exosome [GO:0070062];extracellular space [GO:0005615]	GO:0042840;GO:0019853;GO:0047939;GO:0046185;GO:0004032;GO:0016324;GO:0005975;GO:0006081;GO:0005829;GO:0009055;GO:0070062;GO:0005615;GO:0006006;GO:0019640;GO:1901687;GO:0044281;GO:0006805;GO:0016491;GO:0016491;GO:0016491
22.1271	21.8619	21.3721	27.6499	27.8583	27.8272	29.7689	28.7613	22.1874	27.1076	29.3638	28.7321	27.8256	28.6755	28.105	28.6847	28.4377	28.8895	28.0871	28.9789	7139300000	56	7	25.4	+	4.50949	5.30922		0.198286	1.06189		0.407857	0.2756	P16403;Q02539	P16403	Histone H1.2	HIST1H1C	21.364	nucleosome assembly [GO:0006334];spermatogenesis [GO:0007283];negative regulation of transcription from RNA polymerase II promoter [GO:0000122];nucleosome assembly [GO:0006334];nucleosome positioning [GO:0016584]	chromatin DNA binding [GO:0031490];chromatin DNA binding [GO:0031490];poly(A) RNA binding [GO:0044822]	nuclear chromatin [GO:0000790];nuclear euchromatin [GO:0005719];nucleosome [GO:0000786];nuclear euchromatin [GO:0005719];nucleosome [GO:0000786];nucleus [GO:0005634];transcriptionally active chromatin [GO:0035327]	GO:0031490;GO:0000790;GO:0005719;GO:0000786;GO:0006334;GO:0007283;GO:0031490;GO:0000122;GO:0005719;GO:0000786;GO:0006334;GO:0016584;GO:0005634;GO:0044822;GO:0035327
23.5238	21.8691	22.9697	26.8167	27.013	26.217	21.8412	23.0734	21.3893	28.3495	28.7757	28.4037	27.8047	28.9227	28.0764	28.357	30.5094	30.7881	31.0878	29.8684	12320000000	122	15	70.5	+	3.94733	4.10045	+	4.84847	5.80003	+	3.17662	2.27322	P21964;E7EMS6;E7EUU8;F8WBW9;H7BZ45	P21964;E7EMS6;E7EUU8	Catechol O-methyltransferase	COMT	30.037	cellular response to phosphate starvation [GO:0016036];developmental process [GO:0032502];dopamine catabolic process [GO:0042420];estrogen metabolic process [GO:0008210];female pregnancy [GO:0007565];learning [GO:0007612];methylation [GO:0032259];multicellular organismal reproductive process [GO:0048609];negative regulation of dopamine metabolic process [GO:0045963];negative regulation of renal s…	catechol O-methyltransferase activity [GO:0016206];magnesium ion binding [GO:0000287];O-methyltransferase activity [GO:0008171];O-methyltransferase activity [GO:0008171];catechol O-methyltransferase activity [GO:0016206];magnesium ion binding [GO:0000287];O-methyltransferase activity [GO:0008171];catechol O-methyltransferase activity [GO:0016206];magnesium ion binding [GO:0000287]	axon [GO:0030424];cell body [GO:0044297];cytosol [GO:0005829];dendritic spine [GO:0043197];extracellular exosome [GO:0070062];integral component of membrane [GO:0016021];membrane [GO:0016020];mitochondrion [GO:0005739];plasma membrane [GO:0005886];postsynaptic membrane [GO:0045211]	GO:0008171;GO:0030424;GO:0016206;GO:0044297;GO:0016036;GO:0005829;GO:0043197;GO:0032502;GO:0042420;GO:0008210;GO:0070062;GO:0007565;GO:0016021;GO:0007612;GO:0000287;GO:0016020;GO:0032259;GO:0005739;GO:0048609;GO:0045963;GO:0035814;GO:0048662;GO:0042136;GO:0042135;GO:0005886;GO:0050668;GO:0045211;GO:0051930;GO:0042493;GO:0032496;GO:0014070;GO:0048265;GO:0007614;GO:0044281;GO:0007268;GO:0006805;GO:…
22.0209	21.3974	22.4311	25.5574	25.5885	25.3753	25.1767	25.4867	25.2967	25.4927	25.0923	25.1578	22.1585	25.3595	25.7502	26.1631	25.7066	25.5197	21.8885	25.1779	515740000	35	6	56.8	+	3.64244	2.74903		0.179581	-0.0724328		NaN	NaN	P25398	P25398	40S ribosomal protein S12	RPS12	14.515	cellular nitrogen compound metabolic process [GO:0034641];cellular protein metabolic process [GO:0044267];gene expression [GO:0010467];nuclear-transcribed mRNA catabolic process, nonsense-mediated decay [GO:0000184];selenium compound metabolic process [GO:0001887];selenocysteine metabolic process [GO:0016259];small molecule metabolic process [GO:0044281];SRP-dependent cotranslational protein targ…	poly(A) RNA binding [GO:0044822];structural constituent of ribosome [GO:0003735]	cytosol [GO:0005829];cytosolic small ribosomal subunit [GO:0022627];membrane [GO:0016020]	GO:0006614;GO:0034641;GO:0044267;GO:0005829;GO:0022627;GO:0010467;GO:0016020;GO:0000184;GO:0044822;GO:0001887;GO:0016259;GO:0044281;GO:0003735;GO:0006412;GO:0006414;GO:0006413;GO:0006415;GO:0019058;GO:0016032;GO:0019083
23.0205	22.6791	22.6864	26.0188	26.1075	25.7122	21.6595	23.7817	23.4964	28.4696	28.6847	28.9087	22.6185	21.8108	24.1958	22.8152	29.1155	29.136	29.2585	29.5581	3987700000	63	10	40.8	+	2.04503	2.73953	+	3.41715	5.84428	+	6.31825	6.90766	P30519;A0A087WT44;I3L159;I3L1F5;I3L4P8;I3L463;I3L1Y2;I3L276	P30519;A0A087WT44;I3L159;I3L1F5	Heme oxygenase 2	HMOX2	36.032	cellular iron ion homeostasis [GO:0006879];heme catabolic process [GO:0042167];heme oxidation [GO:0006788];porphyrin-containing compound metabolic process [GO:0006778];response to hypoxia [GO:0001666];small molecule metabolic process [GO:0044281];transmembrane transport [GO:0055085];heme oxidation [GO:0006788];heme oxidation [GO:0006788];heme oxidation [GO:0006788];heme oxidation [GO:0006788];hem…	heme oxygenase (decyclizing) activity [GO:0004392];metal ion binding [GO:0046872];heme oxygenase (decyclizing) activity [GO:0004392];heme oxygenase (decyclizing) activity [GO:0004392];metal ion binding [GO:0046872];heme oxygenase (decyclizing) activity [GO:0004392];metal ion binding [GO:0046872];heme oxygenase (decyclizing) activity [GO:0004392];heme oxygenase (decyclizing) activity [GO:0004392];…	endoplasmic reticulum membrane [GO:0005789];membrane [GO:0016020];plasma membrane [GO:0005886];integral component of membrane [GO:0016021]	GO:0006879;GO:0005789;GO:0042167;GO:0006788;GO:0004392;GO:0016020;GO:0046872;GO:0005886;GO:0006778;GO:0001666;GO:0044281;GO:0055085;GO:0006788;GO:0004392;GO:0006788;GO:0004392;GO:0046872;GO:0006788;GO:0004392;GO:0046872;GO:0006788;GO:0004392;GO:0006788;GO:0004392;GO:0016021;GO:0006979;GO:0006788;GO:0004392;GO:0006788;GO:0004392
22.6981	23.0246	23.1107	25.1132	25.594	25.5177	22.7304	21.8752	22.3287	25.2364	24.9605	25.5875	26.2215	26.3072	25.7905	25.7519	27.8633	27.3903	28.131	27.7052	1790200000	50	10	50	+	2.34456	3.11731	+	2.11131	2.54139		3.78347	1.75468	P35232;C9JW96;C9JZ20;E7ESE2;E9PCW0;D6RBK0	P35232;C9JW96;C9JZ20;E7ESE2;E9PCW0;D6RBK0	Prohibitin	PHB	29.804	cellular response to interleukin-6 [GO:0071354];DNA biosynthetic process [GO:0071897];histone deacetylation [GO:0016575];mitochondrion organization [GO:0007005];negative regulation of androgen receptor signaling pathway [GO:0060766];negative regulation of cell growth [GO:0030308];negative regulation of cell proliferation [GO:0008285];negative regulation of ERK1 and ERK2 cascade [GO:0070373];negat…	complement component C3a binding [GO:0001850];complement component C3b binding [GO:0001851];enzyme binding [GO:0019899];histone deacetylase binding [GO:0042826];proteinase activated receptor binding [GO:0031871];protein C-terminus binding [GO:0008022];RNA polymerase II transcription factor activity, sequence-specific DNA binding [GO:0000981];transcription regulatory region DNA binding [GO:0044212]	cell surface [GO:0009986];cytoplasm [GO:0005737];early endosome [GO:0005769];extracellular exosome [GO:0070062];integral component of plasma membrane [GO:0005887];membrane [GO:0016020];mitochondrial inner membrane [GO:0005743];mitochondrion [GO:0005739];myelin sheath [GO:0043209];nucleoplasm [GO:0005654];nucleus [GO:0005634];plasma membrane [GO:0005886];membrane [GO:0016020];membrane [GO:0016020]…	GO:0071897;GO:0000981;GO:0009986;GO:0071354;GO:0001850;GO:0001851;GO:0005737;GO:0005769;GO:0019899;GO:0070062;GO:0042826;GO:0016575;GO:0005887;GO:0016020;GO:0005743;GO:0005739;GO:0007005;GO:0043209;GO:0070373;GO:0060766;GO:0030308;GO:0008285;GO:2000323;GO:0042177;GO:0010944;GO:0000122;GO:0045892;GO:0005654;GO:0005634;GO:0001649;GO:0005886;GO:0070374;GO:0045745;GO:0045917;GO:0045893;GO:0050847;GO:…
26.7438	26.2961	26.5979	25.184	25.0626	25.0746	26.3283	26.2167	26.3508	26.0784	25.4418	25.4648	27.6947	28.0294	27.5556	27.6055	27.7017	27.8042	27.7001	27.1322	2622800000	141	26	13.5	+	3.32834	-1.43887		1.39709	-0.636934		0.309287	-0.13675	P42345;B1AKP8	P42345	Serine/threonine-protein kinase mTOR	MTOR	288.89	'de novo' pyrimidine nucleobase biosynthetic process [GO:0006207];brain development [GO:0007420];cardiac muscle cell development [GO:0055013];cardiac muscle contraction [GO:0060048];cell aging [GO:0007569];cell cycle arrest [GO:0007050];cell growth [GO:0016049];cellular response to heat [GO:0034605];cellular response to hypoxia [GO:0071456];cellular response to nutrient levels [GO:0031669];DNA re…	ATP binding [GO:0005524];drug binding [GO:0008144];kinase activity [GO:0016301];phosphoprotein binding [GO:0051219];protein serine/threonine kinase activity [GO:0004674];ribosome binding [GO:0043022];RNA polymerase III type 1 promoter DNA binding [GO:0001030];RNA polymerase III type 2 promoter DNA binding [GO:0001031];RNA polymerase III type 3 promoter DNA binding [GO:0001032];TFIIIC-class transc…	cytoplasm [GO:0005737];cytosol [GO:0005829];dendrite [GO:0030425];endomembrane system [GO:0012505];endoplasmic reticulum membrane [GO:0005789];Golgi membrane [GO:0000139];lysosomal membrane [GO:0005765];lysosome [GO:0005764];membrane [GO:0016020];mitochondrial outer membrane [GO:0005741];neuronal cell body [GO:0043025];nucleoplasm [GO:0005654];phosphatidylinositol 3-kinase complex [GO:0005942];PM…	GO:0006207;GO:0005524;GO:0006281;GO:0038095;GO:0000139;GO:0016605;GO:0001030;GO:0001031;GO:0001032;GO:0031295;GO:0001156;GO:0031929;GO:0031931;GO:0031932;GO:0007420;GO:0055013;GO:0060048;GO:0007569;GO:0007050;GO:0016049;GO:0034605;GO:0071456;GO:0031669;GO:0005737;GO:0005829;GO:0030425;GO:0008144;GO:0012505;GO:0005789;GO:0006112;GO:0007173;GO:0008543;GO:0010467;GO:0007281;GO:0040007;GO:0003007;GO:…
23.4303	23.6457	22.5206	25.8258	26.0406	25.7912	27.1308	27.1177	27.0615	27.354	26.8495	26.4845	26.8072	27.748	27.4175	27.9933	27.6002	27.9326	27.7843	27.0344	2474800000	112	18	28	+	3.08026	3.0702		0.338685	-0.207333		0.110271	0.0963759	P49915	P49915	GMP synthase [glutamine-hydrolyzing]	GMPS	76.715	glutamine metabolic process [GO:0006541];nucleobase-containing small molecule metabolic process [GO:0055086];purine nucleobase biosynthetic process [GO:0009113];purine nucleobase metabolic process [GO:0006144];purine ribonucleoside monophosphate biosynthetic process [GO:0009168];small molecule metabolic process [GO:0044281]	ATP binding [GO:0005524];GMP synthase (glutamine-hydrolyzing) activity [GO:0003922];GMP synthase activity [GO:0003921];pyrophosphatase activity [GO:0016462]	cytoplasm [GO:0005737];cytosol [GO:0005829]	GO:0005524;GO:0003922;GO:0003921;GO:0005737;GO:0005829;GO:0006541;GO:0055086;GO:0009113;GO:0006144;GO:0009168;GO:0016462;GO:0044281
26.3997	26.5615	26.5074	27.9282	27.9075	27.7693	27.3614	27.2441	26.9283	30.8496	30.9386	31.1578	23.0455	22.5709	22.4376	22.6014	28.2204	28.0604	27.6034	27.9989	3475500000	163	21	31.2	+	4.43385	1.3788	+	4.74808	3.80407	+	4.60858	5.77806	P50416;H3BMD2;H3BP22;H3BUV7;H3BUJ0;Q92523	P50416	Carnitine O-palmitoyltransferase 1, liver isoform	CPT1A	88.367	carnitine shuttle [GO:0006853];cellular lipid metabolic process [GO:0044255];fatty acid beta-oxidation [GO:0006635];small molecule metabolic process [GO:0044281];carnitine metabolic process [GO:0009437];carnitine shuttle [GO:0006853];cellular lipid metabolic process [GO:0044255];cellular response to fatty acid [GO:0071398];circadian rhythm [GO:0007623];eating behavior [GO:0042755];epithelial cell…	carnitine O-palmitoyltransferase activity [GO:0004095];carnitine O-palmitoyltransferase activity [GO:0004095];palmitoleoyltransferase activity [GO:1990698];transferase activity, transferring acyl groups [GO:0016746];transferase activity, transferring acyl groups [GO:0016746]	integral component of membrane [GO:0016021];mitochondrial outer membrane [GO:0005741];mitochondrion [GO:0005739];integral component of mitochondrial outer membrane [GO:0031307];membrane [GO:0016020];mitochondrial inner membrane [GO:0005743];mitochondrial outer membrane [GO:0005741];mitochondrion [GO:0005739];integral component of membrane [GO:0016021]	GO:0004095;GO:0006853;GO:0044255;GO:0006635;GO:0016021;GO:0005741;GO:0005739;GO:0044281;GO:0004095;GO:0009437;GO:0006853;GO:0044255;GO:0071398;GO:0007623;GO:0042755;GO:0030855;GO:0006635;GO:0006006;GO:0031307;GO:0001676;GO:0016020;GO:0005743;GO:0005741;GO:0005739;GO:1990698;GO:0032000;GO:0051260;GO:0050796;GO:0042493;GO:0014070;GO:0044281;GO:0006641;GO:0016021;GO:0016746;GO:0016746
21.5611	22.3871	23.2053	25.5341	25.5967	25.1853	21.1265	23.2886	21.7412	21.7666	22.8548	22.684	25.4054	24.9278	25.1228	25.5557	26.5157	25.7064	26.0644	25.8111	681600000	18	4	24	+	4.27822	2.87145		NaN	NaN		1.82516	0.771475	P62851	P62851	40S ribosomal protein S25	RPS25	13.742	cellular nitrogen compound metabolic process [GO:0034641];cellular protein metabolic process [GO:0044267];gene expression [GO:0010467];nuclear-transcribed mRNA catabolic process, nonsense-mediated decay [GO:0000184];selenium compound metabolic process [GO:0001887];selenocysteine metabolic process [GO:0016259];small molecule metabolic process [GO:0044281];SRP-dependent cotranslational protein targ…	poly(A) RNA binding [GO:0044822];RNA binding [GO:0003723]	cytoplasm [GO:0005737];cytosol [GO:0005829];cytosolic small ribosomal subunit [GO:0022627];extracellular exosome [GO:0070062];nucleolus [GO:0005730];nucleus [GO:0005634];ribosome [GO:0005840];small ribosomal subunit [GO:0015935]	GO:0003723;GO:0006614;GO:0034641;GO:0044267;GO:0005737;GO:0005829;GO:0022627;GO:0070062;GO:0010467;GO:0000184;GO:0005730;GO:0005634;GO:0044822;GO:0005840;GO:0001887;GO:0016259;GO:0044281;GO:0015935;GO:0006412;GO:0006414;GO:0006413;GO:0006415;GO:0019058;GO:0016032;GO:0019083
22.3806	22.3001	21.7196	26.2534	26.6376	26.5329	22.5789	21.993	22.9076	25.6959	25.9712	25.8539	22.7289	22.0906	22.543	22.7958	21.8824	22.1453	21.9705	22.282	275700000	21	3	31.3	+	4.70917	3.68823	+	4.1975	3.18285		NaN	NaN	P62854;Q5JNZ5	P62854;Q5JNZ5	40S ribosomal protein S26;Putative 40S ribosomal protein S26-like 1	RPS26;RPS26P11	13.015	translation [GO:0006412];cellular nitrogen compound metabolic process [GO:0034641];cellular protein metabolic process [GO:0044267];gene expression [GO:0010467];negative regulation of RNA splicing [GO:0033119];nuclear-transcribed mRNA catabolic process, nonsense-mediated decay [GO:0000184];selenium compound metabolic process [GO:0001887];selenocysteine metabolic process [GO:0016259];small molecule…	mRNA binding [GO:0003729];structural constituent of ribosome [GO:0003735];mRNA binding [GO:0003729];poly(A) RNA binding [GO:0044822];structural constituent of ribosome [GO:0003735]	cytosolic small ribosomal subunit [GO:0022627];cytoplasm [GO:0005737];cytosol [GO:0005829];cytosolic small ribosomal subunit [GO:0022627];extracellular exosome [GO:0070062];membrane [GO:0016020];nucleolus [GO:0005730];small ribosomal subunit [GO:0015935]	GO:0022627;GO:0003729;GO:0003735;GO:0006412;GO:0006614;GO:0034641;GO:0044267;GO:0005737;GO:0005829;GO:0022627;GO:0070062;GO:0010467;GO:0003729;GO:0016020;GO:0033119;GO:0000184;GO:0005730;GO:0044822;GO:0001887;GO:0016259;GO:0044281;GO:0015935;GO:0003735;GO:0006412;GO:0006414;GO:0006413;GO:0006415;GO:0019058;GO:0016032;GO:0019083
21.8361	23.5382	24.3472	26.2518	25.7613	26.6005	26.6352	26.5874	26.5933	26.4361	26.247	25.9419	26.5314	26.9444	27.2819	26.4489	27.1395	27.1401	26.9435	27.0887	1900000000	116	20	33.4	+	2.42254	2.5017		1.28586	-0.396967		0.669622	0.276299	Q01780;K7EJ37	Q01780	Exosome component 10	EXOSC10	100.83	CUT catabolic process [GO:0071034];dosage compensation by inactivation of X chromosome [GO:0009048];histone mRNA catabolic process [GO:0071044];maturation of 5.8S rRNA [GO:0000460];nuclear mRNA surveillance [GO:0071028];nuclear polyadenylation-dependent rRNA catabolic process [GO:0071035];nuclear retention of unspliced pre-mRNA at the site of transcription [GO:0071048];nuclear-transcribed mRNA ca…	3'-5' exonuclease activity [GO:0008408];exoribonuclease activity [GO:0004532];nucleotide binding [GO:0000166];poly(A) RNA binding [GO:0044822]	cytoplasm [GO:0005737];exosome (RNase complex) [GO:0000178];membrane [GO:0016020];nuclear exosome (RNase complex) [GO:0000176];nucleolus [GO:0005730];nucleus [GO:0005634];transcriptionally active chromatin [GO:0035327];nuclear exosome (RNase complex) [GO:0000176]	GO:0008408;GO:0071034;GO:0090503;GO:0005737;GO:0009048;GO:0004532;GO:0000178;GO:0071044;GO:0000460;GO:0016020;GO:0000176;GO:0071028;GO:0071035;GO:0071048;GO:0000956;GO:0000184;GO:0005730;GO:0000166;GO:0005634;GO:0044822;GO:0035327;GO:0006396;GO:0000176
29.108	29.0651	29.1496	30.6614	30.5984	30.2573	29.0465	28.9885	29.2797	30.9354	31.2289	31.2962	25.6943	25.8334	25.6091	25.8875	29.0704	29.6933	28.9269	29.4576	6664500000	339	28	44.9	+	3.40077	1.39813	+	3.87127	2.0486	+	5.84662	3.53097	Q01813;B1APP6;B1APP8;Q5VSR5;H0Y757;V9GYV7;V9GY25;H0Y3Y3	Q01813	ATP-dependent 6-phosphofructokinase, platelet type	PFKP	85.595	canonical glycolysis [GO:0061621];carbohydrate metabolic process [GO:0005975];fructose 6-phosphate metabolic process [GO:0006002];glucose metabolic process [GO:0006006];mitophagy in response to mitochondrial depolarization [GO:0098779];small molecule metabolic process [GO:0044281];fructose 6-phosphate metabolic process [GO:0006002];fructose 6-phosphate metabolic process [GO:0006002];fructose 6-ph…	6-phosphofructokinase activity [GO:0003872];ATP binding [GO:0005524];metal ion binding [GO:0046872];protein complex binding [GO:0032403];6-phosphofructokinase activity [GO:0003872];6-phosphofructokinase activity [GO:0003872];6-phosphofructokinase activity [GO:0003872];6-phosphofructokinase activity [GO:0003872];ATP binding [GO:0005524];6-phosphofructokinase activity [GO:0003872];6-phosphofructoki…	cytosol [GO:0005829];extracellular exosome [GO:0070062];membrane [GO:0016020];nucleus [GO:0005634]	GO:0003872;GO:0005524;GO:0061621;GO:0005975;GO:0005829;GO:0070062;GO:0006002;GO:0006006;GO:0016020;GO:0046872;GO:0098779;GO:0005634;GO:0032403;GO:0044281;GO:0003872;GO:0006002;GO:0003872;GO:0006002;GO:0003872;GO:0006002;GO:0003872;GO:0005524;GO:0006002;GO:0003872;GO:0006002;GO:0003872;GO:0005524;GO:0006002;GO:0003872
26.6947	26.7288	26.5551	29.4725	29.3095	28.8278	21.6057	22.6453	23.2682	26.3349	26.6299	26.8088	23.0101	21.9279	22.1785	22.0609	22.4836	21.8191	21.9603	21.3279	750180000	92	22	40.5	+	3.65134	2.54373	+	2.48679	3.44296		NaN	NaN	Q07065	Q07065	Cytoskeleton-associated protein 4	CKAP4	66.022	cellular protein metabolic process [GO:0044267]	poly(A) RNA binding [GO:0044822]	cytoskeleton [GO:0005856];endoplasmic reticulum [GO:0005783];endoplasmic reticulum membrane [GO:0005789];extracellular exosome [GO:0070062];integral component of membrane [GO:0016021];lamellar body [GO:0042599];lipid particle [GO:0005811];membrane [GO:0016020];perinuclear region of cytoplasm [GO:0048471];plasma membrane [GO:0005886]	GO:0044267;GO:0005856;GO:0005783;GO:0005789;GO:0070062;GO:0016021;GO:0042599;GO:0005811;GO:0016020;GO:0048471;GO:0005886;GO:0044822
21.6723	21.8356	21.9385	25.1797	25.1463	24.812	25.5921	25.3576	25.0233	24.9617	24.7848	25.2761	25.9516	24.1975	24.0183	22.1718	22.7487	23.1735	21.8309	22.1955	292130000	35	5	19.6	+	3.23267	1.89163		0.655158	-0.3168		NaN	NaN	Q07666;O75525;Q5VWX1	Q07666	KH domain-containing, RNA-binding, signal transduction-associated protein 1	KHDRBS1	48.227	cell cycle arrest [GO:0007050];cell proliferation [GO:0008283];cell surface receptor signaling pathway [GO:0007166];G2/M transition of mitotic cell cycle [GO:0000086];mRNA processing [GO:0006397];negative regulation of transcription, DNA-templated [GO:0045892];positive regulation of RNA export from nucleus [GO:0046833];positive regulation of signal transduction [GO:0009967];positive regulation of…	DNA binding [GO:0003677];identical protein binding [GO:0042802];poly(A) binding [GO:0008143];poly(A) RNA binding [GO:0044822];poly(U) RNA binding [GO:0008266];RNA binding [GO:0003723];SH3/SH2 adaptor activity [GO:0005070];poly(A) binding [GO:0008143];poly(U) RNA binding [GO:0008266];poly(A) RNA binding [GO:0044822];RNA binding [GO:0003723]	cytoplasm [GO:0005737];Grb2-Sos complex [GO:0070618];membrane [GO:0016020];nucleoplasm [GO:0005654];nucleus [GO:0005634];nucleus [GO:0005634];nucleoplasm [GO:0005654];nucleus [GO:0005634]	GO:0003677;GO:0000086;GO:0070618;GO:0003723;GO:0005070;GO:0007050;GO:0008283;GO:0007166;GO:0005737;GO:0042802;GO:0006397;GO:0016020;GO:0045892;GO:0005654;GO:0005634;GO:0044822;GO:0008143;GO:0008266;GO:0046833;GO:0009967;GO:0045948;GO:0046831;GO:0007165;GO:0006351;GO:0005634;GO:0008143;GO:0008266;GO:0006355;GO:0006351;GO:0003723;GO:0005654;GO:0005634;GO:0044822;GO:0006355;GO:0007283;GO:0006351
22.19	21.9462	22.125	25.5075	26.5103	25.9281	21.9827	21.5522	23.9286	21.5808	22.1937	23.2098	23.1056	21.7825	22.9036	20.7934	22.6279	22.0462	23.17	23.4697	62962000	3	2	2	+	2.25661	2.56834		NaN	NaN		NaN	NaN	Q0VF96	Q0VF96	Cingulin-like protein 1	CGNL1	149.08		motor activity [GO:0003774]	bicellular tight junction [GO:0005923];myosin complex [GO:0016459]	GO:0005923;GO:0003774;GO:0016459
22.7283	23.0957	21.9114	25.3574	25.5082	25.8065	27.7859	27.5292	27.9207	28.1821	27.6756	27.7654	28.5452	28.7458	28.312	28.1308	28.153	28.0268	28.1412	28.6622	4082800000	165	20	44.6	+	2.96117	2.39885		0.266294	0.1291		0.427657	-0.18765	Q14166	Q14166	Tubulin--tyrosine ligase-like protein 12	TTLL12	74.403	cellular protein modification process [GO:0006464]	ATP binding [GO:0005524]		GO:0005524;GO:0006464
22.2498	21.1886	22.9573	25.1141	25.111	25.1533	26.8284	26.6657	26.7645	26.4694	26.4469	26.6409	25.9633	25.9293	26.7004	26.9753	25.7717	26.4105	26.1005	26.4675	1123800000	115	22	14.6	+	2.72939	2.8537		1.40719	-0.2338		0.274141	-0.204525	Q14669;H7C2Y1;G5E9G6;C9JLJ5;C9JSX9;C9JLD7;F8W9P3;H7C1L9	Q14669	E3 ubiquitin-protein ligase TRIP12	TRIP12	220.43	cellular response to DNA damage stimulus [GO:0006974];DNA repair [GO:0006281];embryo development [GO:0009790];negative regulation of double-strand break repair [GO:2000780];negative regulation of histone H2A K63-linked ubiquitination [GO:1901315];protein ubiquitination involved in ubiquitin-dependent protein catabolic process [GO:0042787]	ligase activity [GO:0016874];thyroid hormone receptor binding [GO:0046966];ubiquitin-protein transferase activity [GO:0004842];ligase activity [GO:0016874];ubiquitin-protein transferase activity [GO:0004842]	nucleoplasm [GO:0005654];nucleus [GO:0005634]	GO:0006281;GO:0006974;GO:0009790;GO:0016874;GO:2000780;GO:1901315;GO:0005654;GO:0005634;GO:0042787;GO:0046966;GO:0004842;GO:0016874;GO:0004842
20.9443	22.3027	20.9288	24.8701	25.7948	25.2736	21.0576	22.3011	22.4976	21.7615	22.0409	22.7495	25.1595	25.4641	25.8368	25.2879	25.1839	25.4713	25.4593	25.1973	540310000	43	10	12.6	+	2.67949	2.19052		NaN	NaN		0.269105	-0.109125	Q14CX7	Q14CX7	N-alpha-acetyltransferase 25, NatB auxiliary subunit	NAA25	112.29	N-terminal peptidyl-methionine acetylation [GO:0017196]		cytoplasm [GO:0005737];Golgi apparatus [GO:0005794];NatB complex [GO:0031416];nucleoplasm [GO:0005654]	GO:0005794;GO:0017196;GO:0031416;GO:0005737;GO:0005654
22.1259	22.0884	22.6597	26.1571	26.1855	26.6349	22.7353	21.7186	22.6157	23.0544	23.0426	23.8519	26.3183	26.3409	26.083	26.4326	26.2535	26.1702	26.0426	25.869	929610000	59	9	24.4	+	2.15082	3.48624		NaN	NaN		0.957928	-0.209875	Q16401;Q4VXH0;F2Z3J2	Q16401	26S proteasome non-ATPase regulatory subunit 5	PSMD5	56.195	activation of MAPKK activity [GO:0000186];anaphase-promoting complex-dependent proteasomal ubiquitin-dependent protein catabolic process [GO:0031145];antigen processing and presentation of exogenous peptide antigen via MHC class I [GO:0042590];antigen processing and presentation of exogenous peptide antigen via MHC class I, TAP-dependent [GO:0002479];antigen processing and presentation of peptide…		cytosol [GO:0005829];nucleoplasm [GO:0005654];proteasome accessory complex [GO:0022624];proteasome complex [GO:0000502]	GO:0006977;GO:0038095;GO:0000082;GO:0000165;GO:0038061;GO:0007265;GO:0050852;GO:0000186;GO:0031145;GO:0042590;GO:0002479;GO:0002474;GO:0006915;GO:0007411;GO:0034641;GO:0005829;GO:0007173;GO:0008543;GO:0010467;GO:0045087;GO:0008286;GO:0000278;GO:0043066;GO:0090090;GO:0051436;GO:0048011;GO:0005654;GO:0006595;GO:0090263;GO:0051437;GO:0012501;GO:0022624;GO:0000502;GO:0070682;GO:0000209;GO:0042981;GO:…
25.0818	25.3819	24.8011	22.3981	23.2153	22.0415	22.8276	22.995	23.3451	21.5607	22.5254	21.9098	21.6525	22.0167	22.5279	22.4276	22.134	23.158	22.7625	23.2473	42559000	10	3	20.5	+	2.622	-2.27715		NaN	NaN		NaN	NaN	Q16762	Q16762	Thiosulfate sulfurtransferase	TST	33.429	cellular nitrogen compound metabolic process [GO:0034641];cyanate catabolic process [GO:0009440];epithelial cell differentiation [GO:0030855];rRNA import into mitochondrion [GO:0035928];rRNA transport [GO:0051029];small molecule metabolic process [GO:0044281];sulfide oxidation, using sulfide:quinone oxidoreductase [GO:0070221];sulfur amino acid catabolic process [GO:0000098];sulfur amino acid met…	5S rRNA binding [GO:0008097];thiosulfate sulfurtransferase activity [GO:0004792]	extracellular exosome [GO:0070062];extracellular space [GO:0005615];mitochondrial inner membrane [GO:0005743];mitochondrial matrix [GO:0005759];mitochondrion [GO:0005739]	GO:0008097;GO:0034641;GO:0009440;GO:0030855;GO:0070062;GO:0005615;GO:0005743;GO:0005759;GO:0005739;GO:0035928;GO:0051029;GO:0044281;GO:0070221;GO:0000098;GO:0000096;GO:0004792
24.6943	24.1643	23.5334	29.8152	29.6139	29.4825	21.6965	24.1046	22.3076	28.7272	29.5134	30.2783	21.7345	22.0363	22.8523	22.9108	29.979	30.2261	30.8737	30.6539	9938800000	93	12	42.6	+	4.02455	5.50653	+	3.48722	6.85527	+	5.94118	9.06104	Q53GQ0;E9PI21	Q53GQ0	Very-long-chain 3-oxoacyl-CoA reductase	HSD17B12	34.324	cellular lipid metabolic process [GO:0044255];estrogen biosynthetic process [GO:0006703];extracellular matrix organization [GO:0030198];fatty acid biosynthetic process [GO:0006633];long-chain fatty-acyl-CoA biosynthetic process [GO:0035338];positive regulation of cell-substrate adhesion [GO:0010811];small molecule metabolic process [GO:0044281];triglyceride biosynthetic process [GO:0019432]	estradiol 17-beta-dehydrogenase activity [GO:0004303];heparin binding [GO:0008201];oxidoreductase activity [GO:0016491]	endoplasmic reticulum membrane [GO:0005789];integral component of membrane [GO:0016021];proteinaceous extracellular matrix [GO:0005578];integral component of membrane [GO:0016021]	GO:0044255;GO:0005789;GO:0004303;GO:0006703;GO:0030198;GO:0006633;GO:0008201;GO:0016021;GO:0035338;GO:0010811;GO:0005578;GO:0044281;GO:0019432;GO:0016021;GO:0016491
27.1489	28.4898	29.0692	22.8601	22.3255	21.7189	27.7885	26.9117	22.7235	27.3708	27.5134	26.6494	27.427	27.3277	27.1744	27.0524	28.3019	28.3221	28.0907	28.5401	2132800000	71	15	24.1	+	2.61696	-4.98615		0.35621	1.29267		3.87953	1.06833	Q6NUQ4;H7C085;H7C008;H7C0H8;H7BZI0	Q6NUQ4	Transmembrane protein 214	TMEM214	77.15	apoptotic process [GO:0006915]		cytoplasm [GO:0005737];cytoplasmic microtubule [GO:0005881];endoplasmic reticulum [GO:0005783];endoplasmic reticulum membrane [GO:0005789];Golgi apparatus [GO:0005794];integral component of membrane [GO:0016021]	GO:0005794;GO:0006915;GO:0005737;GO:0005881;GO:0005783;GO:0005789;GO:0016021
23.2168	22.581	22.0186	24.7513	24.9525	25.3302	24.9431	24.8678	22.5921	21.8473	21.7459	23.3722	24.8822	25.208	24.8329	25.1898	25.1284	25.0394	25.0252	25.2928	502180000	57	14	12.3	+	2.36421	1.84431		NaN	NaN		0.342302	0.0932255	Q7LBC6;H0Y9V5	Q7LBC6	Lysine-specific demethylase 3B	KDM3B	191.58	chromatin modification [GO:0016568];chromatin organization [GO:0006325];regulation of transcription, DNA-templated [GO:0006355];response to cisplatin [GO:0072718];transcription, DNA-templated [GO:0006351]	antioxidant activity [GO:0016209];dioxygenase activity [GO:0051213];metal ion binding [GO:0046872]	nucleoplasm [GO:0005654]	GO:0016209;GO:0016568;GO:0006325;GO:0051213;GO:0046872;GO:0005654;GO:0006355;GO:0072718;GO:0006351
22.3766	22.7923	22.6701	25.0781	24.9258	24.8642	26.5168	26.6388	26.484	25.8853	26.0821	25.4541	26.8859	27.1517	26.7516	27.1162	26.75	27.664	26.9661	25.8524	1710700000	64	12	32.1	+	1.9552	1.94425		1.74275	-0.739367		0.168885	-0.168225	Q8N1G4	Q8N1G4	Leucine-rich repeat-containing protein 47	LRRC47	63.472		poly(A) RNA binding [GO:0044822]		GO:0044822
25.4503	25.8484	25.634	22.4518	22.6308	21.9954	22.3088	23.0707	21.707	21.53	21.9927	22.4601	26.5382	26.6248	26.897	27.1937	26.6619	26.8323	26.6479	26.909	1309700000	92	22	12.2	+	3.56811	-3.29746		NaN	NaN		0.116764	-0.0506501	Q8N3C0;E5RFZ0;J3KNJ4	Q8N3C0	Activating signal cointegrator 1 complex subunit 3	ASCC3	251.46	cell proliferation [GO:0008283];DNA dealkylation involved in DNA repair [GO:0006307];DNA duplex unwinding [GO:0032508];DNA repair [GO:0006281];regulation of transcription, DNA-templated [GO:0006355];transcription, DNA-templated [GO:0006351]	ATP binding [GO:0005524];ATP-dependent 3'-5' DNA helicase activity [GO:0043140];poly(A) RNA binding [GO:0044822]	cytoplasm [GO:0005737];Golgi apparatus [GO:0005794];intracellular [GO:0005622];membrane [GO:0016020];nucleoplasm [GO:0005654];nucleus [GO:0005634];cytoplasm [GO:0005737];Golgi apparatus [GO:0005794]	GO:0005524;GO:0043140;GO:0006307;GO:0032508;GO:0006281;GO:0005794;GO:0008283;GO:0005737;GO:0005622;GO:0016020;GO:0005654;GO:0005634;GO:0044822;GO:0006355;GO:0006351;GO:0005794;GO:0005737
22.1268	22.6572	22.0352	24.3987	24.3619	24.3296	22.3986	23.0294	21.3198	23.0585	21.4836	22.916	22.177	21.7897	22.6546	23.0492	21.4383	21.7098	22.3318	22.0215	27416000	6	4	10	+	1.88253	1.72533		NaN	NaN		NaN	NaN	Q8TB61	Q8TB61	Adenosine 3-phospho 5-phosphosulfate transporter 1	SLC35B2	47.514	3'-phospho-5'-adenylyl sulfate transmembrane transport [GO:1902559];3'-phosphoadenosine 5'-phosphosulfate biosynthetic process [GO:0050428];3'-phosphoadenosine 5'-phosphosulfate metabolic process [GO:0050427];3'-phosphoadenosine 5'-phosphosulfate transport [GO:0046963];carbohydrate metabolic process [GO:0005975];glycosaminoglycan metabolic process [GO:0030203];positive regulation of I-kappaB kina…	3'-phosphoadenosine 5'-phosphosulfate transmembrane transporter activity [GO:0046964];signal transducer activity [GO:0004871]	Golgi apparatus [GO:0005794];Golgi membrane [GO:0000139];integral component of membrane [GO:0016021];membrane [GO:0016020]	GO:1902559;GO:0050428;GO:0050427;GO:0046964;GO:0046963;GO:0005794;GO:0000139;GO:0005975;GO:0030203;GO:0016021;GO:0016020;GO:0043123;GO:0004871;GO:0007165;GO:0044281;GO:0055085;GO:0006805
22.7684	22.8513	22.5802	25.5593	25.1614	25.2812	23.2903	21.9961	23.1156	25.9182	25.9853	26.0976	22.9496	21.9971	22.5863	22.6775	25.2003	24.9505	23.9995	25.1397	212770000	31	12	14.5	+	2.1709	2.28861	+	3.98274	3.31508	+	3.00674	2.22917	Q8TEQ8	Q8TEQ8	GPI ethanolamine phosphate transferase 3	PIGO	118.7	cellular protein metabolic process [GO:0044267];C-terminal protein lipidation [GO:0006501];GPI anchor biosynthetic process [GO:0006506];post-translational protein modification [GO:0043687];preassembly of GPI anchor in ER membrane [GO:0016254]	mannose-ethanolamine phosphotransferase activity [GO:0051377]	endoplasmic reticulum membrane [GO:0005789];integral component of membrane [GO:0016021];membrane [GO:0016020]	GO:0006501;GO:0006506;GO:0044267;GO:0005789;GO:0016021;GO:0051377;GO:0016020;GO:0043687;GO:0016254
23.5503	21.1248	22.0855	24.8123	24.6155	24.5205	23.4589	22.0854	22.0719	26.5024	26.3358	26.958	23.4808	22.9715	23.0975	22.0833	25.5009	25.1658	25.4938	25.4102	313470000	42	8	28.5	+	4.16786	2.09493	+	3.33573	3.73236	+	3.30073	2.82659	Q96K37;A0A0C4DGZ3;C9JK45	Q96K37	Solute carrier family 35 member E1	SLC35E1	44.772	carbohydrate transmembrane transport [GO:0034219]		integral component of membrane [GO:0016021];integral component of membrane [GO:0016021];integral component of membrane [GO:0016021]	GO:0034219;GO:0016021;GO:0016021;GO:0016021
21.9476	21.9217	21.2084	25.2487	24.8997	24.5857	25.5152	25.6349	26.1544	26.7766	26.9793	27.3109	23.3385	23.0292	21.9822	21.728	25.259	25.1689	24.2957	24.9129	329060000	45	8	34.6	+	1.7739	2.09282		2.12759	1.2541	+	2.576	2.63003	Q99536;K7ERT7;K7ESA3;K7EJM4;K7ENX2;K7EM19	Q99536;K7ERT7	Synaptic vesicle membrane protein VAT-1 homolog	VAT1	41.92	negative regulation of mitochondrial fusion [GO:0010637]	oxidoreductase activity [GO:0016491];zinc ion binding [GO:0008270];oxidoreductase activity [GO:0016491];zinc ion binding [GO:0008270];oxidoreductase activity [GO:0016491];zinc ion binding [GO:0008270];oxidoreductase activity [GO:0016491];zinc ion binding [GO:0008270];oxidoreductase activity [GO:0016491];zinc ion binding [GO:0008270]	extracellular exosome [GO:0070062];integral component of membrane [GO:0016021];mitochondrial outer membrane [GO:0005741]	GO:0070062;GO:0016021;GO:0005741;GO:0010637;GO:0016491;GO:0008270;GO:0016491;GO:0008270;GO:0016491;GO:0008270;GO:0016491;GO:0008270;GO:0016491;GO:0008270
21.9503	21.8159	22.8896	27.2158	26.7788	26.5298	22.779	22.7037	23.2497	30.4353	30.307	30.1301	21.8494	20.78	22.7641	21.778	27.24	27.2342	27.1505	27.3423	3086900000	28	6	20.3	+	3.40883	3.43099	+	4.5034	7.6892	+	6.25372	5.56388	Q9BUN8;B4E1G1;E5RGY0	Q9BUN8;B4E1G1;E5RGY0	Derlin-1	DERL1	28.8	endoplasmic reticulum unfolded protein response [GO:0030968];ERAD pathway [GO:0036503];ER-associated misfolded protein catabolic process [GO:0071712];ER-associated ubiquitin-dependent protein catabolic process [GO:0030433];establishment of protein localization [GO:0045184];intracellular transport of viral protein in host cell [GO:0019060];positive regulation of protein binding [GO:0032092];positi…	ATPase binding [GO:0051117];MHC class I protein binding [GO:0042288];protease binding [GO:0002020];receptor activity [GO:0004872];ubiquitin protein ligase binding [GO:0031625];ubiquitin-specific protease binding [GO:1990381]	Derlin-1 retrotranslocation complex [GO:0036513];Derlin-1-VIMP complex [GO:0036502];early endosome [GO:0005769];endoplasmic reticulum [GO:0005783];host cell [GO:0043657];integral component of endoplasmic reticulum membrane [GO:0030176];integral component of membrane [GO:0016021];late endosome [GO:0005770];membrane [GO:0016020];endoplasmic reticulum [GO:0005783];integral component of membrane [GO:…	GO:0051117;GO:0036513;GO:0036502;GO:0071712;GO:0030433;GO:0036503;GO:0042288;GO:0005769;GO:0005783;GO:0030968;GO:0045184;GO:0043657;GO:0030176;GO:0016021;GO:0019060;GO:0005770;GO:0016020;GO:0032092;GO:0031398;GO:0002020;GO:0031648;GO:0051260;GO:0004872;GO:0006986;GO:0030970;GO:0031625;GO:1990381;GO:0005783;GO:0016021;GO:0005783;GO:0016021
22.292	22.1065	22.7367	24.7934	24.7202	24.4346	21.5547	22.5896	21.7853	22.4214	22.5845	22.4096	23.2789	21.7515	23.3561	22.2071	22.747	22.0833	23.2858	22.5835	37878000	8	4	5.9	+	3.54402	2.03593		NaN	NaN		NaN	NaN	Q9BYX2	Q9BYX2	TBC1 domain family member 2A	TBC1D2	105.41	positive regulation of GTPase activity [GO:0043547]	cadherin binding [GO:0045296];GTPase activator activity [GO:0005096]	cell junction [GO:0030054];cytoplasmic, membrane-bounded vesicle [GO:0016023];cytoplasmic vesicle [GO:0031410]	GO:0005096;GO:0045296;GO:0030054;GO:0031410;GO:0016023;GO:0043547
22.1832	22.2906	23.219	24.8304	24.5302	24.4984	21.2962	21.992	22.0437	24.4951	24.2789	24.2623	22.2698	22.9989	21.6136	22.7661	24.0568	23.9826	24.4026	24.5247	147010000	25	5	15.6	+	2.73173	1.62775		2.32499	1.80654	+	3.96507	2.25795	Q9HDC9;H0Y512	Q9HDC9;H0Y512	Adipocyte plasma membrane-associated protein	APMAP	46.48	biosynthetic process [GO:0009058];biosynthetic process [GO:0009058]	arylesterase activity [GO:0004064];strictosidine synthase activity [GO:0016844];strictosidine synthase activity [GO:0016844]	cell surface [GO:0009986];endoplasmic reticulum [GO:0005783];extracellular exosome [GO:0070062];integral component of membrane [GO:0016021];membrane [GO:0016020];integral component of membrane [GO:0016021]	GO:0004064;GO:0009058;GO:0009986;GO:0005783;GO:0070062;GO:0016021;GO:0016020;GO:0016844;GO:0009058;GO:0016021;GO:0016844
26.7444	26.2178	26.5919	29.2466	28.8808	28.3441	22.1025	24.4337	24.4603	30.1367	30.524	30.7889	25.186	25.182	24.5684	24.4613	31.0039	30.9925	30.7397	30.6625	12840000000	207	17	25.4	+	2.78378	2.3058	+	2.93804	6.83855	+	6.87708	6.00023	Q9NQC3;H7C106;A0A0U1RQR6	Q9NQC3	Reticulon-4	RTN4	129.93	apoptotic process [GO:0006915];axonal fasciculation [GO:0007413];axonogenesis [GO:0007409];cardiac epithelial to mesenchymal transition [GO:0060317];cerebral cortex radial glia guided migration [GO:0021801];endoplasmic reticulum tubular network organization [GO:0071786];negative regulation of axon extension [GO:0030517];negative regulation of axonogenesis [GO:0050771];negative regulation of cell …	poly(A) RNA binding [GO:0044822]	endoplasmic reticulum [GO:0005783];extracellular exosome [GO:0070062];integral component of endoplasmic reticulum membrane [GO:0030176];intracellular [GO:0005622];neuronal postsynaptic density [GO:0097481];nuclear envelope [GO:0005635];plasma membrane [GO:0005886];endoplasmic reticulum membrane [GO:0005789];integral component of membrane [GO:0016021]	GO:0006915;GO:0007413;GO:0007409;GO:0060317;GO:0021801;GO:0005783;GO:0071786;GO:0070062;GO:0030176;GO:0005622;GO:0030517;GO:0050771;GO:0030308;GO:0097481;GO:0048011;GO:0005635;GO:0005886;GO:0044822;GO:0042981;GO:0050770;GO:2000172;GO:0030334;GO:0005789;GO:0016021
22.868	21.9793	22.002	25.6177	26.2183	26.1308	28.269	28.5329	28.4317	28.313	28.3571	28.3124	28.9061	29.0752	28.6102	29.1858	28.4996	28.8677	28.7642	29.1281	5316900000	162	16	39.8	+	2.51879	3.16662		0.461934	-0.0836995		0.300568	-0.129425	Q9P258	Q9P258	Protein RCC2	RCC2	56.084	activation of GTPase activity [GO:0090630];cell division [GO:0051301];chromosome passenger complex localization to kinetochore [GO:0072356];establishment of protein localization [GO:0045184];focal adhesion assembly [GO:0048041];integrin-mediated signaling pathway [GO:0007229];mitotic cell cycle [GO:0000278];mitotic nuclear division [GO:0007067];negative regulation of focal adhesion assembly [GO:0…	microtubule binding [GO:0008017];poly(A) RNA binding [GO:0044822];protein domain specific binding [GO:0019904];protein kinase binding [GO:0019901];Rac GTPase binding [GO:0048365];small GTPase binding [GO:0031267]	chromosome, centromeric core domain [GO:0034506];cytosol [GO:0005829];early endosome membrane [GO:0031901];microtubule [GO:0005874];midbody [GO:0030496];mitotic spindle midzone [GO:1990023];nucleolus [GO:0005730];plasma membrane [GO:0005886]	GO:0048365;GO:0090630;GO:0051301;GO:0072356;GO:0034506;GO:0005829;GO:0031901;GO:0045184;GO:0048041;GO:0007229;GO:0005874;GO:0008017;GO:0030496;GO:0000278;GO:0007067;GO:1990023;GO:0034260;GO:0051895;GO:1900025;GO:0005730;GO:0005886;GO:0044822;GO:0010971;GO:0051987;GO:0019904;GO:0019901;GO:0030334;GO:0010762;GO:1900027;GO:0031267;GO:0007264
22.6085	22.1052	23.1481	25.3902	25.8825	25.034	25.9071	26.134	26.8467	25.8188	25.8621	23.4942	27.0366	27.2891	27.6082	26.5522	27.7313	26.1639	26.7195	26.3501	1694000000	38	7	45.9	+	2.03801	2.56144		0.60325	-1.63931		0.404055	-0.380325	Q9UBQ5;K7ES31;K7EQM4;A0A087WVB9;K7ERF1;B4DQ48;K7EK53	Q9UBQ5;K7ES31;K7EQM4;A0A087WVB9;K7ERF1	Eukaryotic translation initiation factor 3 subunit K	EIF3K	25.059	cellular protein metabolic process [GO:0044267];formation of translation preinitiation complex [GO:0001731];gene expression [GO:0010467];regulation of translational initiation [GO:0006446];translation [GO:0006412];translational initiation [GO:0006413];formation of translation preinitiation complex [GO:0001731];regulation of translational initiation [GO:0006446];regulation of translational initiat…	ribosome binding [GO:0043022];translation initiation factor activity [GO:0003743];ribosome binding [GO:0043022];translation initiation factor activity [GO:0003743];ribosome binding [GO:0043022];translation initiation factor activity [GO:0003743];ribosome binding [GO:0043022];translation initiation factor activity [GO:0003743];ribosome binding [GO:0043022];translation initiation factor activity [G…	cytoplasm [GO:0005737];cytosol [GO:0005829];eukaryotic 43S preinitiation complex [GO:0016282];eukaryotic 48S preinitiation complex [GO:0033290];eukaryotic translation initiation factor 3 complex [GO:0005852];extracellular exosome [GO:0070062];membrane [GO:0016020];nucleus [GO:0005634];eukaryotic 43S preinitiation complex [GO:0016282];eukaryotic 48S preinitiation complex [GO:0033290];eukaryotic tr…	GO:0044267;GO:0005737;GO:0005829;GO:0016282;GO:0033290;GO:0005852;GO:0070062;GO:0001731;GO:0010467;GO:0016020;GO:0005634;GO:0006446;GO:0043022;GO:0006412;GO:0003743;GO:0006413;GO:0016282;GO:0033290;GO:0005852;GO:0001731;GO:0005634;GO:0006446;GO:0043022;GO:0003743;GO:0005737;GO:0005852;GO:0006446;GO:0043022;GO:0003743;GO:0016282;GO:0033290;GO:0005852;GO:0001731;GO:0005634;GO:0006446;GO:0043022;GO:…
25.2729	25.4595	25.1073	21.5237	22.908	22.8022	22.3705	22.2087	21.7459	22.2791	23.5964	22.2232	22.9163	23.7769	24.0146	23.1202	22.6026	22.2505	22.7257	22.6665	97407000	18	5	14.4	+	3.35331	-2.74864		NaN	NaN		NaN	NaN	Q9Y305;H7C5Q2;C9J7L8	Q9Y305;H7C5Q2	Acyl-coenzyme A thioesterase 9, mitochondrial	ACOT9	49.901	acyl-CoA metabolic process [GO:0006637];cellular lipid metabolic process [GO:0044255];long-chain fatty-acyl-CoA biosynthetic process [GO:0035338];small molecule metabolic process [GO:0044281];triglyceride biosynthetic process [GO:0019432]	acetyl-CoA hydrolase activity [GO:0003986];carboxylic ester hydrolase activity [GO:0052689]	mitochondrial matrix [GO:0005759];mitochondrion [GO:0005739]	GO:0003986;GO:0006637;GO:0052689;GO:0044255;GO:0035338;GO:0005759;GO:0005739;GO:0044281;GO:0019432
27.4229	26.6852	26.6057	28.9895	28.6768	28.5325	25.3842	25.3765	22.3422	30.7935	30.939	30.9858	26.3797	26.4354	26.166	26.8595	30.6117	30.6516	30.7814	31.0287	14609000000	179	11	50.2	+	2.47326	1.82833	+	2.70118	6.41728	+	6.55894	4.3082	Q9Y6C9	Q9Y6C9	Mitochondrial carrier homolog 2	MTCH2	33.331	hepatocyte apoptotic process [GO:0097284];protein localization to mitochondrion [GO:0070585];regulation of mitochondrial membrane permeability involved in apoptotic process [GO:1902108]		extracellular exosome [GO:0070062];integral component of membrane [GO:0016021];membrane [GO:0016020];mitochondrial inner membrane [GO:0005743];mitochondrial outer membrane [GO:0005741];nucleus [GO:0005634]	GO:0070062;GO:0097284;GO:0016021;GO:0016020;GO:0005743;GO:0005741;GO:0005634;GO:0070585;GO:1902108
22.1073	21.7466	21.943	22.5134	21.8939	22.6604	22.3195	21.8943	22.8322	22.1923	22.7707	24.1867	23.0524	22.186	22.6096	22.4159	22.5121	23.0834	22.4345	22.7892	39539000	5	2	17.4		NaN	NaN		NaN	NaN		0.764247	0.542449	A0A024QZ42;O75340;H0Y9X3;A0A087WZ38	A0A024QZ42;O75340;H0Y9X3;A0A087WZ38	Programmed cell death protein 6	PDCD6	14.45	activation of cysteine-type endopeptidase activity involved in apoptotic process [GO:0006919];angiogenesis [GO:0001525];apoptotic signaling pathway [GO:0097190];cellular response to heat [GO:0034605];intracellular protein transport [GO:0006886];negative regulation of protein kinase B signaling [GO:0051898];negative regulation of TOR signaling [GO:0032007];negative regulation of vascular endotheli…	binding, bridging [GO:0060090];calcium-dependent cysteine-type endopeptidase activity [GO:0004198];calcium-dependent protein binding [GO:0048306];calcium ion binding [GO:0005509];identical protein binding [GO:0042802];protein anchor [GO:0043495];protein dimerization activity [GO:0046983];calcium ion binding [GO:0005509];calcium ion binding [GO:0005509];calcium ion binding [GO:0005509]	cytoplasm [GO:0005737];cytoplasmic vesicle [GO:0031410];endoplasmic reticulum [GO:0005783];endoplasmic reticulum exit site [GO:0070971];endoplasmic reticulum membrane [GO:0005789];endosome [GO:0005768];extracellular exosome [GO:0070062];nuclear membrane [GO:0031965];nucleus [GO:0005634]	GO:0006919;GO:0001525;GO:0097190;GO:0060090;GO:0005509;GO:0004198;GO:0048306;GO:0034605;GO:0005737;GO:0031410;GO:0005783;GO:0070971;GO:0005789;GO:0005768;GO:0070062;GO:0042802;GO:0006886;GO:0032007;GO:0051898;GO:0030948;GO:0031965;GO:0005634;GO:0045766;GO:0043280;GO:0010595;GO:0001938;GO:0043495;GO:0046983;GO:0006508;GO:0051592;GO:0036324;GO:0005509;GO:0005509;GO:0005509
23.2835	22.5472	22.5809	23.2713	22.7536	22.7141	23.3935	22.1313	22.9635	22.5212	21.2858	22.6297	24.8928	25.0604	25.6182	25.2141	25.4172	25.4224	25.3362	24.6682	497490000	38	9	37		NaN	NaN		NaN	NaN		0.0208042	0.0146251	A0A024QZP7;P06493;E5RIU6;A0A087WZZ9;K7ELV5;G3V317	A0A024QZP7;P06493;E5RIU6;A0A087WZZ9	Cyclin-dependent kinase 1	CDC2;CDK1	34.081	activation of MAPK activity [GO:0000187];anaphase-promoting complex-dependent proteasomal ubiquitin-dependent protein catabolic process [GO:0031145];apoptotic process [GO:0006915];cell aging [GO:0007569];cell division [GO:0051301];cell migration [GO:0016477];cellular response to hydrogen peroxide [GO:0070301];centrosome cycle [GO:0007098];chromosome condensation [GO:0030261];DNA repair [GO:000628…	ATP binding [GO:0005524];cyclin-dependent protein serine/threonine kinase activity [GO:0004693];histone kinase activity [GO:0035173];protein kinase activity [GO:0004672];protein serine/threonine kinase activity [GO:0004674];RNA polymerase II carboxy-terminal domain kinase activity [GO:0008353];ATP binding [GO:0005524];protein kinase activity [GO:0004672];ATP binding [GO:0005524];protein kinase ac…	centrosome [GO:0005813];cytoplasm [GO:0005737];cytosol [GO:0005829];extracellular exosome [GO:0070062];membrane [GO:0016020];midbody [GO:0030496];mitochondrion [GO:0005739];mitotic spindle [GO:0072686];nuclear chromosome, telomeric region [GO:0000784];nucleoplasm [GO:0005654];nucleus [GO:0005634];spindle microtubule [GO:0005876];cytoplasm [GO:0005737];nucleus [GO:0005634]	GO:0005524;GO:0006281;GO:0006260;GO:0000082;GO:0000086;GO:0090166;GO:0008353;GO:0000187;GO:0031145;GO:0006915;GO:0007569;GO:0051301;GO:0016477;GO:0070301;GO:0005813;GO:0007098;GO:0030261;GO:0004693;GO:0005737;GO:0005829;GO:0030855;GO:0070062;GO:0035173;GO:0016020;GO:0000226;GO:0030496;GO:0005739;GO:0007095;GO:0000278;GO:0007067;GO:0007077;GO:0072686;GO:0043066;GO:0000784;GO:0005654;GO:0005634;GO:…
22.1557	22.3894	23.4727	22.1823	22.2551	21.3122	21.8269	22.3418	22.5647	22.551	22.5198	22.8856	24.4125	25.5704	25.7944	25.8349	25.2732	25.6235	25.2423	26.1674	561390000	40	11	36.1		NaN	NaN		NaN	NaN		0.168586	0.17355	A0A024QZX5;A0A087X1N8;P35237;C9JTJ8;C9JVA8;H7BXK7;P50452	A0A024QZX5;A0A087X1N8;P35237	Serpin B6	SERPINB6	43.024	negative regulation of endopeptidase activity [GO:0010951];cellular response to osmotic stress [GO:0071470];negative regulation of endopeptidase activity [GO:0010951];sensory perception of sound [GO:0007605]	serine-type endopeptidase inhibitor activity [GO:0004867];protease binding [GO:0002020];serine-type endopeptidase inhibitor activity [GO:0004867]	cytosol [GO:0005829];extracellular exosome [GO:0070062];extracellular space [GO:0005615];cytoplasm [GO:0005737];cytosol [GO:0005829];extracellular exosome [GO:0070062];extracellular space [GO:0005615];protein complex [GO:0043234];extracellular space [GO:0005615];extracellular space [GO:0005615];extracellular space [GO:0005615];extracellular space [GO:0005615];extracellular space [GO:0005615]	GO:0005829;GO:0070062;GO:0005615;GO:0010951;GO:0004867;GO:0071470;GO:0005737;GO:0005829;GO:0070062;GO:0005615;GO:0010951;GO:0002020;GO:0043234;GO:0007605;GO:0004867;GO:0005615;GO:0005615;GO:0005615;GO:0005615;GO:0005615
27.2783	26.3218	27.3021	26.5576	26.879	26.5514	22.2822	21.6665	22.6322	22.8973	22.2596	22.0804	22.2285	22.3611	22.6022	22.2839	23.1204	23.0271	22.2676	24.8356	255860000	52	17	17.9		0.375291	-0.304733		NaN	NaN		NaN	NaN	A0A024R4E5;Q00341;H0Y394;H7C0A4;C9JIZ1;H7BZC3;C9JZI8;C9J5E5;C9JHS7;C9JHZ8;C9JES8;H7C2D1;C9JBS3;C9JEJ8;A0A0U1RVI6;C9JHN6;C9JT62;C9JK79;C9JMQ6;C9JQ82	A0A024R4E5;Q00341;H0Y394	Vigilin	HDLBP	141.44	cholesterol metabolic process [GO:0008203];lipid transport [GO:0006869]	lipid binding [GO:0008289];poly(A) RNA binding [GO:0044822];RNA binding [GO:0003723];RNA binding [GO:0003723];RNA binding [GO:0003723];RNA binding [GO:0003723];RNA binding [GO:0003723];RNA binding [GO:0003723];RNA binding [GO:0003723]	cytoplasm [GO:0005737];high-density lipoprotein particle [GO:0034364];nucleus [GO:0005634];plasma membrane [GO:0005886];cytoplasm [GO:0005737]	GO:0008203;GO:0005737;GO:0034364;GO:0008289;GO:0006869;GO:0005634;GO:0005886;GO:0044822;GO:0003723;GO:0005737;GO:0003723;GO:0003723;GO:0003723;GO:0003723;GO:0003723;GO:0003723
27.9387	28.2901	28.2995	28.0744	28.4743	28.3874	28.8268	28.4929	28.3053	28.1943	28.8895	28.6452	28.7641	28.3363	28.5665	28.1395	27.9988	28.0888	28.4309	28.507	4012100000	109	11	40.2		0.329451	0.135934		0.0466309	0.0346667		0.479979	-0.195224	A0A024R4M0;P46781;B5MCT8;C9JM19;F2Z3C0;A8MXK4	A0A024R4M0;P46781;B5MCT8;C9JM19	40S ribosomal protein S9	RPS9	22.591	cellular nitrogen compound metabolic process [GO:0034641];cellular protein metabolic process [GO:0044267];gene expression [GO:0010467];nuclear-transcribed mRNA catabolic process, nonsense-mediated decay [GO:0000184];positive regulation of cell proliferation [GO:0008284];positive regulation of translational fidelity [GO:0045903];selenium compound metabolic process [GO:0001887];selenocysteine metab…	poly(A) RNA binding [GO:0044822];rRNA binding [GO:0019843];structural constituent of ribosome [GO:0003735];translation regulator activity [GO:0045182];rRNA binding [GO:0019843];structural constituent of ribosome [GO:0003735];rRNA binding [GO:0019843];structural constituent of ribosome [GO:0003735];rRNA binding [GO:0019843];structural constituent of ribosome [GO:0003735];rRNA binding [GO:0019843];…	cytoplasm [GO:0005737];cytosol [GO:0005829];cytosolic small ribosomal subunit [GO:0022627];extracellular exosome [GO:0070062];focal adhesion [GO:0005925];intracellular ribonucleoprotein complex [GO:0030529];membrane [GO:0016020];nucleolus [GO:0005730];nucleus [GO:0005634];ribosome [GO:0005840];small ribosomal subunit [GO:0015935];small ribosomal subunit [GO:0015935];small ribosomal subunit [GO:00…	GO:0006614;GO:0034641;GO:0044267;GO:0005737;GO:0005829;GO:0022627;GO:0070062;GO:0005925;GO:0010467;GO:0030529;GO:0016020;GO:0000184;GO:0005730;GO:0005634;GO:0044822;GO:0008284;GO:0045903;GO:0019843;GO:0005840;GO:0001887;GO:0016259;GO:0044281;GO:0003735;GO:0006412;GO:0045182;GO:0006414;GO:0006413;GO:0006415;GO:0019058;GO:0016032;GO:0019083;GO:0019843;GO:0015935;GO:0003735;GO:0006412;GO:0019843;GO:…
22.6248	21.5576	21.7519	22.4909	22.9946	22.3889	23.1966	22.3407	23.2071	22.648	22.2231	22.7371	23.1499	22.2283	22.481	22.3134	24.6656	24.8295	24.5942	24.5946	215390000	24	8	30.4		NaN	NaN		NaN	NaN		2.65037	2.04914	C9J2Z4;A0A024R571;Q9H4M9;C9JC03;C9JDQ8	C9J2Z4;A0A024R571;Q9H4M9;C9JC03;C9JDQ8	EH domain-containing protein 1	EHD1	34.721	blood coagulation [GO:0007596];cellular response to nerve growth factor stimulus [GO:1990090];cholesterol homeostasis [GO:0042632];cilium assembly [GO:0042384];endocytic recycling [GO:0032456];endocytosis [GO:0006897];intracellular protein transport [GO:0006886];low-density lipoprotein particle clearance [GO:0034383];neuron projection development [GO:0031175];positive regulation of cholesterol st…	ATP binding [GO:0005524];calcium ion binding [GO:0005509];GTP binding [GO:0005525];Rab GTPase binding [GO:0017137];calcium ion binding [GO:0005509];GTP binding [GO:0005525];GTP binding [GO:0005525];GTP binding [GO:0005525];GTP binding [GO:0005525]	ciliary pocket membrane [GO:0020018];early endosome membrane [GO:0031901];endosome membrane [GO:0010008];extracellular exosome [GO:0070062];lipid particle [GO:0005811];membrane [GO:0016020];plasma membrane [GO:0005886];platelet dense tubular network membrane [GO:0031095];recycling endosome membrane [GO:0055038];early endosome [GO:0005769];endocytic vesicle [GO:0030139];endosome membrane [GO:00100…	GO:0005524;GO:0005525;GO:0017137;GO:0007596;GO:0005509;GO:1990090;GO:0042632;GO:0020018;GO:0042384;GO:0031901;GO:0032456;GO:0006897;GO:0010008;GO:0070062;GO:0006886;GO:0005811;GO:0034383;GO:0016020;GO:0031175;GO:0005886;GO:0031095;GO:0010886;GO:2001137;GO:1901741;GO:0051260;GO:0061512;GO:0055038;GO:0005525;GO:0005509;GO:1990090;GO:0042632;GO:0005769;GO:0032456;GO:0030139;GO:0010008;GO:0005811;GO:…
22.3237	20.8897	22.6627	22.5481	22.3377	23.0991	21.8768	21.234	21.8669	21.6507	22.9317	23.2517	20.9327	22.4359	22.7028	23.5057	23.385	23.6683	22.5679	22.2064	6233800	3	2	10.7		1.15819	-0.733133		NaN	NaN		NaN	NaN	A0A024R7W5;A0A087X0Q1;A0A087WY31;Q7Z739	A0A024R7W5;A0A087X0Q1;A0A087WY31;Q7Z739	YTH domain-containing family protein 3	YTHDF3	58.311		N6-methyladenosine-containing RNA binding [GO:1990247];poly(A) RNA binding [GO:0044822]		GO:1990247;GO:0044822
22.8455	22.8115	22.4538	21.9633	22.243	23.7513	23.6865	21.886	25.3495	21.9023	22.405	21.8672	22.7077	23.5482	22.5741	23.9239	23.0651	24.0296	24.2297	22.6547	206090000	26	5	38.9		NaN	NaN		NaN	NaN		0.00613028	-0.011766	A0A024RA52;P25787;C9JCK5;H7C402;H3BT36	A0A024RA52;P25787;C9JCK5	Proteasome subunit alpha type;Proteasome subunit alpha type-2	PSMA2	25.898	activation of MAPKK activity [GO:0000186];anaphase-promoting complex-dependent proteasomal ubiquitin-dependent protein catabolic process [GO:0031145];antigen processing and presentation of exogenous peptide antigen via MHC class I [GO:0042590];antigen processing and presentation of exogenous peptide antigen via MHC class I, TAP-dependent [GO:0002479];antigen processing and presentation of peptide…	threonine-type endopeptidase activity [GO:0004298];threonine-type endopeptidase activity [GO:0004298];threonine-type endopeptidase activity [GO:0004298];endopeptidase activity [GO:0004175]	cytoplasmic mRNA processing body [GO:0000932];cytosol [GO:0005829];extracellular exosome [GO:0070062];nucleoplasm [GO:0005654];nucleus [GO:0005634];proteasome complex [GO:0000502];proteasome core complex [GO:0005839];proteasome core complex, alpha-subunit complex [GO:0019773];cytoplasm [GO:0005737];nucleus [GO:0005634];proteasome core complex, alpha-subunit complex [GO:0019773];proteasome core co…	GO:0006977;GO:0038095;GO:0000082;GO:0000165;GO:0038061;GO:0007265;GO:0050852;GO:0000186;GO:0031145;GO:0042590;GO:0002479;GO:0002474;GO:0006915;GO:0007411;GO:0034641;GO:0000932;GO:0005829;GO:0007173;GO:0070062;GO:0008543;GO:0010467;GO:0045087;GO:0008286;GO:0000278;GO:0043066;GO:0090090;GO:0051436;GO:0048011;GO:0005654;GO:0005634;GO:0006595;GO:0090263;GO:0051437;GO:0012501;GO:0000502;GO:0005839;GO:…
22.783	22.8911	22.0549	24.5053	24.5592	24.7006	21.9643	22.6934	21.9384	25.149	25.2129	25.8597	21.9648	24.15	23.9153	24.6861	24.8658	25.5573	25.4509	25.4601	279370000	46	10	13		2.4696	1.21244	+	3.23046	3.0222		1.19837	1.87719	A0A024RCR6;A0A0G2JK23;P46379;A0A0G2JL47;F6S6P2;X6REW1;A0A0G2JJM1;F6TC96;F6UR09;F6U1F2;F6XTU0;H0Y710;A0A0G2JJR8;F6WML8;F6VEM6;F6X9W3;F6U341;H0Y4L1	A0A024RCR6;A0A0G2JK23;P46379;A0A0G2JL47	Large proline-rich protein BAG6	BAT3;BAG6	118.7	brain development [GO:0007420];cell differentiation [GO:0030154];chromatin modification [GO:0016568];embryo development [GO:0009790];immune system process [GO:0002376];internal peptidyl-lysine acetylation [GO:0018393];intrinsic apoptotic signaling pathway in response to DNA damage by p53 class mediator [GO:0042771];intrinsic apoptotic signaling pathway in response to endoplasmic reticulum stress …	misfolded protein binding [GO:0051787];polyubiquitin binding [GO:0031593];proteasome binding [GO:0070628];ribosome binding [GO:0043022];ubiquitin protein ligase binding [GO:0031625];ubiquitin-specific protease binding [GO:1990381]	BAT3 complex [GO:0071818];cytoplasm [GO:0005737];cytosol [GO:0005829];intracellular membrane-bounded organelle [GO:0043231];membrane [GO:0016020];nucleoplasm [GO:0005654];nucleus [GO:0005634]	GO:0071818;GO:0007420;GO:0030154;GO:0016568;GO:0005737;GO:0005829;GO:0009790;GO:0002376;GO:0018393;GO:0043231;GO:0042771;GO:0070059;GO:0001822;GO:0030324;GO:1904378;GO:0016020;GO:0051787;GO:0043066;GO:0032435;GO:0045861;GO:0005654;GO:0005634;GO:0031593;GO:1904294;GO:0070628;GO:1904379;GO:0050821;GO:0042127;GO:0043022;GO:0007283;GO:0007130;GO:0071816;GO:0006810;GO:0031625;GO:0006511;GO:1990381
24.774	24.7805	24.867	25.3327	25.2629	25.1132	21.953	22.0164	22.2909	24.6598	22.0711	24.9859	22.9814	25.3423	22.7753	24.0683	25.1524	25.5847	24.2349	24.1352	293730000	28	5	33.1		2.41458	0.429099		NaN	NaN		0.712163	1.24363	H0YN88;A0A075B716;P08708;H0YN73	H0YN88;A0A075B716;P08708	40S ribosomal protein S17	RPS17	15.919	cellular nitrogen compound metabolic process [GO:0034641];cellular protein metabolic process [GO:0044267];erythrocyte homeostasis [GO:0034101];gene expression [GO:0010467];nuclear-transcribed mRNA catabolic process, nonsense-mediated decay [GO:0000184];ribosomal small subunit assembly [GO:0000028];ribosomal small subunit biogenesis [GO:0042274];rRNA processing [GO:0006364];selenium compound metab…	poly(A) RNA binding [GO:0044822];structural constituent of ribosome [GO:0003735];structural constituent of ribosome [GO:0003735];structural constituent of ribosome [GO:0003735];structural constituent of ribosome [GO:0003735]	cytosol [GO:0005829];cytosolic small ribosomal subunit [GO:0022627];extracellular exosome [GO:0070062];focal adhesion [GO:0005925];membrane [GO:0016020];ribosome [GO:0005840];ribosome [GO:0005840];ribosome [GO:0005840];ribosome [GO:0005840]	GO:0006614;GO:0034641;GO:0044267;GO:0005829;GO:0022627;GO:0034101;GO:0070062;GO:0005925;GO:0010467;GO:0016020;GO:0000184;GO:0044822;GO:0006364;GO:0000028;GO:0042274;GO:0005840;GO:0001887;GO:0016259;GO:0044281;GO:0003735;GO:0006412;GO:0006414;GO:0006413;GO:0006415;GO:0019058;GO:0016032;GO:0019083;GO:0005840;GO:0003735;GO:0006412;GO:0005840;GO:0003735;GO:0006412;GO:0005840;GO:0003735;GO:0006412
22.6575	22.8447	21.3101	23.0475	22.0198	22.1389	23.2215	20.6832	23.1255	22.6976	22.6461	22.3176	23.4161	23.3067	23.5112	23.9915	22.7181	23.9861	22.0245	23.7128	91174000	11	2	29.9		NaN	NaN		NaN	NaN		2.73619	-1.21282	A0A075B746;P82921	A0A075B746;P82921	28S ribosomal protein S21, mitochondrial	MRPS21	10.688	mitochondrial translation [GO:0032543];mitochondrial translational elongation [GO:0070125];mitochondrial translational initiation [GO:0070124];mitochondrial translational termination [GO:0070126];organelle organization [GO:0006996];translation [GO:0006412];translation [GO:0006412]	poly(A) RNA binding [GO:0044822];structural constituent of ribosome [GO:0003735];structural constituent of ribosome [GO:0003735]	mitochondrial inner membrane [GO:0005743];mitochondrial small ribosomal subunit [GO:0005763];mitochondrial inner membrane [GO:0005743];ribosome [GO:0005840]	GO:0005743;GO:0005763;GO:0032543;GO:0070125;GO:0070124;GO:0070126;GO:0006996;GO:0044822;GO:0003735;GO:0006412;GO:0005743;GO:0005840;GO:0003735;GO:0006412
22.3696	22.661	22.1102	21.9273	22.6543	22.4178	22.3915	21.4735	22.4206	22.065	23.1884	22.3637	23.0647	22.9587	22.8783	23.218	22.5422	23.9114	22.6797	22.3468	98014000	18	3	23.6		NaN	NaN		NaN	NaN		NaN	NaN	U3KQE2;K7EM73;K7EIV0;A0A075B7C0;A0A0C4DGQ5;P04632;U3KPR7;K7EKD8	U3KQE2;K7EM73;K7EIV0;A0A075B7C0;A0A0C4DGQ5;P04632;U3KPR7;K7EKD8	Calpain small subunit 1	CAPNS1	18.445	extracellular matrix disassembly [GO:0022617];extracellular matrix organization [GO:0030198];positive regulation of cell proliferation [GO:0008284];proteolysis [GO:0006508];proteolysis [GO:0006508];proteolysis [GO:0006508];proteolysis [GO:0006508];proteolysis [GO:0006508];proteolysis [GO:0006508];proteolysis [GO:0006508]	calcium-dependent cysteine-type endopeptidase activity [GO:0004198];calcium ion binding [GO:0005509];calcium ion binding [GO:0005509];calcium ion binding [GO:0005509];calcium ion binding [GO:0005509];calcium ion binding [GO:0005509];calcium ion binding [GO:0005509];calcium ion binding [GO:0005509];calcium ion binding [GO:0005509]	cytosol [GO:0005829];extracellular exosome [GO:0070062];membrane [GO:0016020];plasma membrane [GO:0005886]	GO:0005509;GO:0004198;GO:0005829;GO:0070062;GO:0022617;GO:0030198;GO:0016020;GO:0005886;GO:0008284;GO:0005509;GO:0006508;GO:0005509;GO:0006508;GO:0005509;GO:0006508;GO:0005509;GO:0006508;GO:0005509;GO:0006508;GO:0005509;GO:0006508;GO:0005509;GO:0006508
22.4812	22.8985	21.6107	22.1261	23.3888	22.1525	22.8202	21.9058	22.3687	25.3034	24.639	25.119	22.0634	22.6491	21.8889	22.9368	25.198	26.0707	25.3295	25.3922	409110000	28	10	14.5		NaN	NaN	+	2.53687	2.39083	+	5.45337	3.96718	A0A075B7F8;A8CG34;A0A087WY75;C9JFL1	A0A075B7F8;A8CG34;A0A087WY75	Nuclear envelope pore membrane protein POM 121C	POM121C	125.09	carbohydrate metabolic process [GO:0005975];cellular protein metabolic process [GO:0044267];cellular response to heat [GO:0034605];cytokine-mediated signaling pathway [GO:0019221];gene expression [GO:0010467];gene silencing by RNA [GO:0031047];glucose transport [GO:0015758];hexose transport [GO:0008645];mitotic cell cycle [GO:0000278];mitotic nuclear envelope disassembly [GO:0007077];modulation b…		endoplasmic reticulum membrane [GO:0005789];integral component of membrane [GO:0016021];nuclear envelope [GO:0005635];nuclear membrane [GO:0031965];nuclear pore [GO:0005643];integral component of membrane [GO:0016021]	GO:0005975;GO:0044267;GO:0034605;GO:0019221;GO:0005789;GO:0010467;GO:0031047;GO:0015758;GO:0008645;GO:0016021;GO:0051028;GO:0000278;GO:0007077;GO:0019048;GO:0019054;GO:0005635;GO:0031965;GO:0005643;GO:0043687;GO:0016925;GO:0015031;GO:1900034;GO:0010827;GO:0044281;GO:0008033;GO:0055085;GO:0019058;GO:0016032;GO:0019083;GO:0016021
30.0114	30.4245	30.2979	29.8027	30.1648	30.2125	27.8339	27.8828	28.1706	27.7421	28.0884	28.4855	27.4635	26.3075	26.2975	26.6195	26.8811	26.813	25.0889	27.0782	3345600000	194	21	57.1		0.445883	-0.1846		0.234909	0.1429		0.146423	-0.2067	E9PIR7;F8W809;A0A087WSW9;E9PNQ6;A0A087WSY9;Q16881;E2QRB9;E9PKD3;A0A0B4J225;E9PIZ5;E9PLT3;E9PKI4;E9PQI3;E9PRI8	E9PIR7;F8W809;A0A087WSW9;E9PNQ6;A0A087WSY9;Q16881;E2QRB9	Thioredoxin reductase 1, cytoplasmic	TXNRD1	53.166	cell proliferation [GO:0008283];cell redox homeostasis [GO:0045454];cellular lipid metabolic process [GO:0044255];cellular nitrogen compound metabolic process [GO:0034641];cellular oxidant detoxification [GO:0098869];gene expression [GO:0010467];mesoderm formation [GO:0001707];nucleobase-containing small molecule interconversion [GO:0015949];nucleobase-containing small molecule metabolic process …	electron carrier activity [GO:0009055];flavin adenine dinucleotide binding [GO:0050660];methylseleninic acid reductase activity [GO:0098626];methylselenol reductase activity [GO:0098625];protein disulfide oxidoreductase activity [GO:0015035];thioredoxin-disulfide reductase activity [GO:0004791];oxidoreductase activity [GO:0016491];oxidoreductase activity, acting on a sulfur group of donors, NAD(P…	cytosol [GO:0005829];extracellular exosome [GO:0070062];mitochondrion [GO:0005739];nucleus [GO:0005634];nucleolus [GO:0005730];nucleoplasm [GO:0005654];cell [GO:0005623];cell [GO:0005623];cell [GO:0005623];cell [GO:0005623];cell [GO:0005623]	GO:0008283;GO:0045454;GO:0044255;GO:0034641;GO:0098869;GO:0005829;GO:0009055;GO:0070062;GO:0050660;GO:0010467;GO:0001707;GO:0098626;GO:0098625;GO:0005739;GO:0015949;GO:0055086;GO:0005634;GO:0015035;GO:0000302;GO:0001887;GO:0007165;GO:0044281;GO:0004791;GO:0006367;GO:0016491;GO:0016668;GO:0045454;GO:0050660;GO:0005730;GO:0005654;GO:0004791;GO:0005623;GO:0045454;GO:0009055;GO:0050660;GO:0016668;GO:…
22.4377	22.8524	21.996	22.2306	21.9278	21.4957	22.3539	22.2512	22.2267	23.6714	23.2089	21.7805	23.2242	23.9174	23.2883	23.9332	23.5271	23.6801	23.6033	23.3844	127960000	11	2	5.2		NaN	NaN		NaN	NaN		0.0740608	-0.0420504	A0A087WT20;Q9NV06;E5RHM4;A0A087X1F8;B3KME9	A0A087WT20;Q9NV06;E5RHM4;A0A087X1F8;B3KME9	DDB1- and CUL4-associated factor 13	DCAF13	67.55	maturation of SSU-rRNA from tricistronic rRNA transcript (SSU-rRNA, 5.8S rRNA, LSU-rRNA) [GO:0000462];protein ubiquitination [GO:0016567]	poly(A) RNA binding [GO:0044822]	cell junction [GO:0030054];centrosome [GO:0005813];Cul4-RING E3 ubiquitin ligase complex [GO:0080008];cytoplasm [GO:0005737];nucleolus [GO:0005730];nucleus [GO:0005634];small-subunit processome [GO:0032040];cell junction [GO:0030054];centrosome [GO:0005813];cytoplasm [GO:0005737];nucleolus [GO:0005730];nucleus [GO:0005634];cell junction [GO:0030054];centrosome [GO:0005813];cytoplasm [GO:0005737];…	GO:0080008;GO:0030054;GO:0005813;GO:0005737;GO:0000462;GO:0005730;GO:0005634;GO:0044822;GO:0016567;GO:0032040;GO:0030054;GO:0005813;GO:0005737;GO:0005730;GO:0005634;GO:0030054;GO:0005813;GO:0005737;GO:0005730;GO:0005634
22.5834	23.5672	22.5079	21.348	21.898	21.9536	21.9806	21.0423	21.537	21.5368	23.4574	22.2002	23.7353	24.5208	24.334	24.9519	21.4657	22.6712	22.4469	22.2904	156850000	14	2	12.1		NaN	NaN		NaN	NaN		3.00769	-2.14266	E9PQS1;A0A087WT99;Q9H0W9;E9PR95;E9PSC3;E9PLC5;E9PLB3;E9PIP1;E9PPB5;E9PJU8	E9PQS1;A0A087WT99;Q9H0W9;E9PR95;E9PSC3;E9PLC5;E9PLB3;E9PIP1;E9PPB5;E9PJU8	Ester hydrolase C11orf54	C11orf54	26.333		hydrolase activity, acting on ester bonds [GO:0016788];zinc ion binding [GO:0008270]	extracellular exosome [GO:0070062];nucleus [GO:0005634];nucleus [GO:0005634];nucleus [GO:0005634];nucleus [GO:0005634];nucleus [GO:0005634];nucleus [GO:0005634];nucleus [GO:0005634];nucleus [GO:0005634];nucleus [GO:0005634];nucleus [GO:0005634]	GO:0070062;GO:0016788;GO:0005634;GO:0008270;GO:0005634;GO:0005634;GO:0005634;GO:0005634;GO:0005634;GO:0005634;GO:0005634;GO:0005634;GO:0005634
22.2697	22.6597	22.6682	22.8797	22.5809	21.7402	22.2104	22.7386	22.6916	22.4755	22.1395	23.1086	23.6249	23.6609	22.4427	23.2723	23.4454	23.3786	23.8095	23.4722	113650000	12	4	13.7		NaN	NaN		NaN	NaN		0.276664	0.111636	A0A087WTA5;E7ERK9;Q9UI10;H7C2L8;A0A087WW69;F8W8L6	A0A087WTA5;E7ERK9;Q9UI10;H7C2L8;A0A087WW69;F8W8L6	Translation initiation factor eIF-2B subunit delta	EIF2B4	57.495	cellular protein metabolic process [GO:0044267];cellular response to stimulus [GO:0051716];gene expression [GO:0010467];myelination [GO:0042552];negative regulation of translational initiation [GO:0045947];negative regulation of translational initiation in response to stress [GO:0032057];oligodendrocyte development [GO:0014003];ovarian follicle development [GO:0001541];positive regulation of GTPa…	translation initiation factor activity [GO:0003743];translation initiation factor binding [GO:0031369];translation initiation factor activity [GO:0003743]	cytoplasm [GO:0005737];cytosol [GO:0005829];eukaryotic translation initiation factor 2B complex [GO:0005851]	GO:0044267;GO:0051716;GO:0005737;GO:0005829;GO:0005851;GO:0010467;GO:0042552;GO:0045947;GO:0032057;GO:0014003;GO:0001541;GO:0043547;GO:0006417;GO:0009749;GO:0009408;GO:0043434;GO:0006412;GO:0003743;GO:0031369;GO:0006413;GO:0003743;GO:0044237;GO:0044237;GO:0044237
27.1629	27.5675	27.3593	27.2767	27.5304	27.5316	26.797	26.8309	27.0532	27.0765	27.3746	27.3478	27.9559	27.685	27.694	27.5485	27.6797	27.1145	27.2316	27.8538	2291800000	199	20	37.4		0.224722	0.0829995		1.39459	0.372599		0.605729	-0.25095	A0A087WTP3;Q92945;M0R0I5;M0QYH3;M0QXW7;M0QYG1;M0R0C6;M0R3J3;M0R251;M0R263	A0A087WTP3;Q92945	Far upstream element-binding protein 2	KHSRP	73.027	gene expression [GO:0010467];mRNA catabolic process [GO:0006402];mRNA processing [GO:0006397];mRNA transport [GO:0051028];regulation of miRNA metabolic process [GO:2000628];regulation of mRNA stability [GO:0043488];regulation of transcription, DNA-templated [GO:0006355];RNA splicing [GO:0008380];RNA splicing, via transesterification reactions [GO:0000375];transcription, DNA-templated [GO:0006351]	DNA binding [GO:0003677];mRNA 3'-UTR binding [GO:0003730];poly(A) RNA binding [GO:0044822];RNA binding [GO:0003723];RNA binding [GO:0003723];RNA binding [GO:0003723];RNA binding [GO:0003723];RNA binding [GO:0003723]	cytoplasmic stress granule [GO:0010494];cytosol [GO:0005829];dendrite [GO:0030425];membrane [GO:0016020];neuronal cell body [GO:0043025];nucleoplasm [GO:0005654];nucleoplasm [GO:0005654];nucleoplasm [GO:0005654]	GO:0003677;GO:0008380;GO:0000375;GO:0010494;GO:0005829;GO:0030425;GO:0010467;GO:0003730;GO:0006402;GO:0006397;GO:0051028;GO:0016020;GO:0043025;GO:0005654;GO:0044822;GO:0043488;GO:2000628;GO:0006355;GO:0006351;GO:0003723;GO:0003723;GO:0003723;GO:0005654;GO:0003723;GO:0003723;GO:0005654
21.8959	21.6461	21.0471	22.196	23.1354	22.2882	27.2792	27.9098	27.2707	27.5859	26.5428	25.7965	23.2819	23.4715	24.1114	22.736	24.5166	23.6814	21.7486	22.6991	365800000	69	17	25.4		NaN	NaN		0.685793	-0.844833		NaN	NaN	A0A087WVR3;A0A087WTW0;Q96T88;A0A087WWG9	A0A087WVR3;A0A087WTW0;Q96T88	E3 ubiquitin-protein ligase UHRF1	UHRF1	91.099	cell cycle [GO:0007049];cell proliferation [GO:0008283];DNA methylation on cytosine [GO:0032776];DNA repair [GO:0006281];gene expression [GO:0010467];histone monoubiquitination [GO:0010390];histone ubiquitination [GO:0016574];maintenance of DNA methylation [GO:0010216];negative regulation of transcription from RNA polymerase II promoter [GO:0000122];positive regulation of cellular protein metabol…	core promoter proximal region sequence-specific DNA binding [GO:0000987];hemi-methylated DNA-binding [GO:0044729];histone binding [GO:0042393];identical protein binding [GO:0042802];ligase activity [GO:0016874];methylated histone binding [GO:0035064];methyl-CpG binding [GO:0008327];nucleosomal histone binding [GO:0031493];transcription factor activity, sequence-specific DNA binding [GO:0003700];u…	euchromatin [GO:0000791];heterochromatin [GO:0000792];nuclear chromatin [GO:0000790];nuclear heterochromatin [GO:0005720];nuclear matrix [GO:0016363];nucleus [GO:0005634];replication fork [GO:0005657];cytoplasmic vesicle [GO:0031410];nuclear heterochromatin [GO:0005720];nuclear matrix [GO:0016363];plasma membrane [GO:0005886]	GO:0032776;GO:0006281;GO:0007049;GO:0008283;GO:0000987;GO:0000791;GO:0010467;GO:0044729;GO:0000792;GO:0042393;GO:0010390;GO:0016574;GO:0042802;GO:0016874;GO:0010216;GO:0008327;GO:0035064;GO:0000122;GO:0000790;GO:0005720;GO:0016363;GO:0031493;GO:0005634;GO:2000373;GO:0032270;GO:0045944;GO:0051865;GO:0042787;GO:0040029;GO:0090308;GO:0005657;GO:0003700;GO:0006351;GO:0061630;GO:0004842;GO:0008270;GO:…
22.1527	21.713	23.8945	24.2373	24.2886	24.3402	21.1503	23.2093	21.9163	21.7208	21.7782	20.8143	23.882	23.6072	23.8547	22.6097	25.1895	24.8667	25.3793	25.3475	313660000	31	6	28.6		0.773557	0.912153		NaN	NaN		1.68973	2.05997	A0A087WUC6;E9PI68;Q15005;E9PRB9;E9PL01;H0YE04	A0A087WUC6;E9PI68;Q15005;E9PRB9;E9PL01	Signal peptidase complex subunit 2	SPCS2	25.09	cellular protein metabolic process [GO:0044267];gene expression [GO:0010467];protein targeting to ER [GO:0045047];regulation of insulin secretion [GO:0050796];signal peptide processing [GO:0006465];SRP-dependent cotranslational protein targeting to membrane [GO:0006614];translation [GO:0006412];signal peptide processing [GO:0006465];signal peptide processing [GO:0006465];signal peptide processing…	peptidase activity [GO:0008233];peptidase activity [GO:0008233];peptidase activity [GO:0008233];peptidase activity [GO:0008233];peptidase activity [GO:0008233];peptidase activity [GO:0008233]	endoplasmic reticulum membrane [GO:0005789];integral component of membrane [GO:0016021];signal peptidase complex [GO:0005787];integral component of membrane [GO:0016021];signal peptidase complex [GO:0005787];integral component of membrane [GO:0016021];signal peptidase complex [GO:0005787];integral component of membrane [GO:0016021];signal peptidase complex [GO:0005787];integral component of membr…	GO:0006614;GO:0044267;GO:0005789;GO:0010467;GO:0016021;GO:0008233;GO:0045047;GO:0050796;GO:0005787;GO:0006465;GO:0006412;GO:0016021;GO:0008233;GO:0005787;GO:0006465;GO:0016021;GO:0008233;GO:0005787;GO:0006465;GO:0016021;GO:0008233;GO:0005787;GO:0006465;GO:0016021;GO:0008233;GO:0005787;GO:0006465;GO:0016021;GO:0008233;GO:0005787;GO:0006465
22.1856	22.0927	22.7357	22.2516	22.1677	22.9353	25.3208	25.1509	24.8004	25.2337	24.8658	24.5545	22.5432	24.9678	25.1644	25.0751	25.0934	24.9825	24.8675	24.362	365080000	25	2	6.6		NaN	NaN		0.342457	-0.206033		0.287413	0.577761	A0A087WUK2;O14979	A0A087WUK2;O14979	Heterogeneous nuclear ribonucleoprotein D-like	HNRNPDL	40.04	regulation of gene expression [GO:0010468];regulation of transcription, DNA-templated [GO:0006355];RNA processing [GO:0006396];transcription, DNA-templated [GO:0006351]	DNA binding [GO:0003677];double-stranded DNA binding [GO:0003690];nucleotide binding [GO:0000166];poly(A) binding [GO:0008143];poly(A) RNA binding [GO:0044822];poly(G) binding [GO:0034046];single-stranded DNA binding [GO:0003697];nucleic acid binding [GO:0003676];nucleotide binding [GO:0000166]	cytoplasm [GO:0005737];extracellular exosome [GO:0070062];nucleoplasm [GO:0005654];nucleus [GO:0005634];spliceosomal complex [GO:0005681];intracellular ribonucleoprotein complex [GO:0030529];viral nucleocapsid [GO:0019013]	GO:0003677;GO:0006396;GO:0005737;GO:0003690;GO:0070062;GO:0005654;GO:0000166;GO:0005634;GO:0044822;GO:0008143;GO:0034046;GO:0010468;GO:0006355;GO:0003697;GO:0005681;GO:0006351;GO:0030529;GO:0003676;GO:0000166;GO:0019013
21.0955	22.955	22.8157	21.5908	21.6727	21.313	21.9764	22.4847	22.5834	22.3378	22.5516	22.8536	23.3868	23.1959	23.5933	24.3076	23.7013	24.3021	24.0466	23.58	150330000	11	3	20.6		NaN	NaN		NaN	NaN		0.436175	0.2866	E7ETK0;A0A087WUS0;P62847	E7ETK0;A0A087WUS0;P62847	40S ribosomal protein S24	RPS24	15.197	cellular nitrogen compound metabolic process [GO:0034641];cellular protein metabolic process [GO:0044267];erythrocyte homeostasis [GO:0034101];gene expression [GO:0010467];maturation of SSU-rRNA from tricistronic rRNA transcript (SSU-rRNA, 5.8S rRNA, LSU-rRNA) [GO:0000462];nuclear-transcribed mRNA catabolic process, nonsense-mediated decay [GO:0000184];ribosomal small subunit biogenesis [GO:00422…	nucleotide binding [GO:0000166];poly(A) RNA binding [GO:0044822];structural constituent of ribosome [GO:0003735];translation initiation factor binding [GO:0031369];nucleotide binding [GO:0000166];structural constituent of ribosome [GO:0003735];nucleotide binding [GO:0000166];structural constituent of ribosome [GO:0003735]	cytoplasm [GO:0005737];cytosol [GO:0005829];cytosolic small ribosomal subunit [GO:0022627];membrane [GO:0016020];nucleus [GO:0005634];small ribosomal subunit [GO:0015935];ribosome [GO:0005840];cytoplasm [GO:0005737];nucleus [GO:0005634];ribosome [GO:0005840]	GO:0006614;GO:0034641;GO:0044267;GO:0005737;GO:0005829;GO:0022627;GO:0034101;GO:0010467;GO:0000462;GO:0016020;GO:0000184;GO:0000166;GO:0005634;GO:0044822;GO:0006364;GO:0042274;GO:0001887;GO:0016259;GO:0044281;GO:0015935;GO:0003735;GO:0006412;GO:0031369;GO:0006414;GO:0006413;GO:0006415;GO:0019058;GO:0016032;GO:0019083;GO:0000166;GO:0005840;GO:0003735;GO:0006412;GO:0005737;GO:0000166;GO:0005634;GO:…
25.5498	25.8588	25.7745	25.2904	25.6419	25.8083	25.3737	25.1431	25.1336	25.5616	25.6963	25.4895	26.111	25.4932	25.8424	25.3924	25.9847	26.1292	25.6112	26.304	766230000	76	11	13.6		0.34228	-0.147501		1.67636	0.365667		0.643993	0.297525	A0A087WUT6;O60841	A0A087WUT6;O60841	Eukaryotic translation initiation factor 5B	EIF5B	138.68	cellular protein metabolic process [GO:0044267];gene expression [GO:0010467];regulation of translational initiation [GO:0006446];translation [GO:0006412];translational initiation [GO:0006413]	GTPase activity [GO:0003924];GTP binding [GO:0005525];poly(A) RNA binding [GO:0044822];translation initiation factor activity [GO:0003743];GTPase activity [GO:0003924];GTP binding [GO:0005525]	cytoplasm [GO:0005737];cytosol [GO:0005829]	GO:0005525;GO:0003924;GO:0044267;GO:0005737;GO:0005829;GO:0010467;GO:0044822;GO:0006446;GO:0006412;GO:0003743;GO:0006413;GO:0005525;GO:0003924
21.11	23.0505	21.96	22.2375	22.8215	22.0097	22.2255	21.9286	21.9403	21.3078	22.3298	22.7329	22.752	22.0171	22.9304	22.1268	22.1795	23.0891	22.4666	22.5372	38722000	5	2	5.4		NaN	NaN		NaN	NaN		NaN	NaN	A0A087WUU7;Q96GX5	A0A087WUU7;Q96GX5	Serine/threonine-protein kinase greatwall	MASTL	53.296	activation of anaphase-promoting complex activity involved in meiotic cell cycle [GO:0051487];cell division [GO:0051301];cellular response to DNA damage stimulus [GO:0006974];female meiosis II [GO:0007147];G2/M transition of mitotic cell cycle [GO:0000086];intracellular signal transduction [GO:0035556];mitotic cell cycle [GO:0000278];mitotic nuclear division [GO:0007067];negative regulation of pr…	ATP binding [GO:0005524];kinase activity [GO:0016301];protein phosphatase 2A binding [GO:0051721];protein serine/threonine kinase activity [GO:0004674];ATP binding [GO:0005524];protein serine/threonine kinase activity [GO:0004674]	centrosome [GO:0005813];cleavage furrow [GO:0032154];cytoplasm [GO:0005737];nucleoplasm [GO:0005654];nucleus [GO:0005634]	GO:0005524;GO:0000086;GO:0051487;GO:0051301;GO:0006974;GO:0005813;GO:0032154;GO:0005737;GO:0007147;GO:0035556;GO:0016301;GO:0000278;GO:0007067;GO:0034048;GO:0005654;GO:0005634;GO:0018105;GO:0051721;GO:0004674;GO:0051726;GO:0005524;GO:0004674
23.4904	21.5647	23.1199	21.7318	24.0459	21.879	21.9628	22.156	22.4214	22.0105	22.193	22.1184	21.8873	22.5014	22.7422	22.3309	23.002	23.9745	24.3356	24.4263	93561000	6	3	26.5		NaN	NaN		NaN	NaN		NaN	NaN	A0A087WUV8;P35613;A0A087X2B5;R4GN83;R4GMX5;I3L192	A0A087WUV8;P35613;A0A087X2B5	Basigin	BSG	20.542	blood coagulation [GO:0007596];cell surface receptor signaling pathway [GO:0007166];cellular metabolic process [GO:0044237];decidualization [GO:0046697];embryo implantation [GO:0007566];extracellular matrix disassembly [GO:0022617];extracellular matrix organization [GO:0030198];leukocyte migration [GO:0050900];odontogenesis of dentin-containing tooth [GO:0042475];protein targeting to plasma membr…	mannose binding [GO:0005537]	acrosomal membrane [GO:0002080];extracellular exosome [GO:0070062];focal adhesion [GO:0005925];Golgi membrane [GO:0000139];integral component of plasma membrane [GO:0005887];melanosome [GO:0042470];membrane [GO:0016020];membrane raft [GO:0045121];mitochondrion [GO:0005739];plasma membrane [GO:0005886];sarcolemma [GO:0042383];membrane [GO:0016020];membrane [GO:0016020];membrane [GO:0016020];membra…	GO:0000139;GO:0002080;GO:0007596;GO:0007166;GO:0044237;GO:0046697;GO:0007566;GO:0070062;GO:0022617;GO:0030198;GO:0005925;GO:0005887;GO:0050900;GO:0005537;GO:0042470;GO:0016020;GO:0045121;GO:0005739;GO:0042475;GO:0005886;GO:0072661;GO:0006090;GO:0051591;GO:0046689;GO:0043434;GO:0042383;GO:0044281;GO:0016020;GO:0016020;GO:0016020;GO:0016020;GO:0016021
22.2618	21.8461	23.0213	21.5786	22.8604	22.7449	23.0368	21.714	21.3022	22.8408	22.7096	22.5816	22.2783	21.4593	21.8128	22.2921	25.4954	26.234	25.562	26.0232	511360000	17	4	22.4		NaN	NaN		NaN	NaN	+	2.66222	3.60838	A0A087WUX8;A0A087WYF7;Q6UXV4	A0A087WUX8;A0A087WYF7;Q6UXV4	MICOS complex subunit MIC27	APOOL	28.761			MICOS complex [GO:0061617];mitochondrion [GO:0005739]	GO:0061617;GO:0005739
22.0472	22.0521	21.0257	21.44	22.419	22.4226	22.243	22.1957	22.0769	23.1991	22.9448	21.9157	22.1957	22.8283	22.3929	23.4368	21.2439	21.3387	23.8982	22.5907	30476000	8	2	4.4		NaN	NaN		NaN	NaN		NaN	NaN	A0A087WV57;A0A087WYS3;H7C4X9;A0A0A0MTK7;A0A087WVZ6;Q9ULU4;Q5TH12	A0A087WV57;A0A087WYS3;H7C4X9;A0A0A0MTK7;A0A087WVZ6;Q9ULU4;Q5TH12	Protein kinase C-binding protein 1	ZMYND8	85.629	modulation of excitatory postsynaptic potential [GO:0098815];negative regulation of transcription from RNA polymerase II promoter [GO:0000122];positive regulation of dendritic spine development [GO:0060999];positive regulation of dendritic spine maintenance [GO:1902952];positive regulation of filopodium assembly [GO:0051491];regulation of postsynaptic density protein 95 clustering [GO:1902897];re…	chromatin binding [GO:0003682];histone binding [GO:0042393];repressing transcription factor binding [GO:0070491];RNA polymerase II regulatory region sequence-specific DNA binding [GO:0000977];RNA polymerase II transcription corepressor activity [GO:0001106];transcription cofactor activity [GO:0003712];zinc ion binding [GO:0008270];zinc ion binding [GO:0008270];zinc ion binding [GO:0008270];zinc i…	cytoplasm [GO:0005737];dendritic shaft [GO:0043198];dendritic spine [GO:0043197];nucleus [GO:0005634]	GO:0000977;GO:0001106;GO:0003682;GO:0005737;GO:0043198;GO:0043197;GO:0042393;GO:0098815;GO:0000122;GO:0005634;GO:0060999;GO:1902952;GO:0051491;GO:1902897;GO:0006355;GO:0070491;GO:0003712;GO:0008270;GO:0008270;GO:0008270;GO:0008270;GO:0008270;GO:0008270;GO:0008270
28.5418	28.6152	28.8124	28.5594	28.6885	28.2136	28.6799	28.6499	28.5627	28.5196	28.9809	28.616	28.8052	28.3768	28.5116	28.0352	28.2964	28.2915	28.0877	28.7444	3979700000	578	76	35.7		0.446009	-0.1693		0.198376	0.0746663		0.138112	-0.0772004	A0A087WV66;P46013	A0A087WV66;P46013	Antigen KI-67	MKI67	358.62	cell proliferation [GO:0008283];cellular response to heat [GO:0034605];cholangiocyte proliferation [GO:1990705];DNA metabolic process [GO:0006259];hepatocyte proliferation [GO:0072574];hyaluronan metabolic process [GO:0030212];meiotic nuclear division [GO:0007126];organ regeneration [GO:0031100];response to organic cyclic compound [GO:0014070]	ATP binding [GO:0005524];poly(A) RNA binding [GO:0044822];protein C-terminus binding [GO:0008022]	chromosome, centromeric region [GO:0000775];condensed chromosome [GO:0000793];cytoplasm [GO:0005737];membrane [GO:0016020];nucleolus [GO:0005730];nucleus [GO:0005634]	GO:0005524;GO:0006259;GO:0008283;GO:0034605;GO:1990705;GO:0000775;GO:0000793;GO:0005737;GO:0072574;GO:0030212;GO:0007126;GO:0016020;GO:0005730;GO:0005634;GO:0031100;GO:0044822;GO:0008022;GO:0014070
22.1725	23.2793	22.1225	21.4923	22.435	21.7935	22.0838	22.7664	22.4932	22.5282	22.9747	21.8818	23.4298	23.6468	23.7334	23.0919	23.5071	23.4152	23.0835	23.5247	168030000	17	5	11		NaN	NaN		NaN	NaN		0.210032	-0.0928502	A0A087WVC1;Q9BQ39	A0A087WVC1;Q9BQ39	ATP-dependent RNA helicase DDX50	DDX50	82.226	RNA secondary structure unwinding [GO:0010501]	ATP binding [GO:0005524];ATP-dependent RNA helicase activity [GO:0004004];poly(A) RNA binding [GO:0044822];ATP binding [GO:0005524];helicase activity [GO:0004386];RNA binding [GO:0003723]	membrane [GO:0016020];nucleolus [GO:0005730];plasma membrane [GO:0005886];nucleus [GO:0005634]	GO:0005524;GO:0004004;GO:0010501;GO:0016020;GO:0005730;GO:0005886;GO:0044822;GO:0005524;GO:0003723;GO:0004386;GO:0005634
31.8927	31.7643	31.804	31.9025	31.7917	31.9497	31.8475	31.9285	31.8647	31.6096	31.4535	31.4489	32.5659	32.8541	32.7664	32.9696	32.8481	32.8116	33.0119	32.4037	82654000000	1078	73	52		0.432957	0.0609665		2.52804	-0.376233		0.0454742	-0.020174	A0A087WVQ6;Q00610;J3KS13;K7EJJ5;J3KSQ2;J3QL20;J3KRF5	A0A087WVQ6;Q00610	Clathrin heavy chain;Clathrin heavy chain 1	CLTC	192.06	antigen processing and presentation of exogenous peptide antigen via MHC class II [GO:0019886];intracellular protein transport [GO:0006886];membrane organization [GO:0061024];mitotic nuclear division [GO:0007067];negative regulation of hyaluronan biosynthetic process [GO:1900126];negative regulation of protein localization to plasma membrane [GO:1903077];osteoblast differentiation [GO:0001649];po…	clathrin light chain binding [GO:0032051];double-stranded RNA binding [GO:0003725];poly(A) RNA binding [GO:0044822];protein kinase binding [GO:0019901];structural molecule activity [GO:0005198];structural molecule activity [GO:0005198];structural molecule activity [GO:0005198];structural molecule activity [GO:0005198];structural molecule activity [GO:0005198]	clathrin coat [GO:0030118];clathrin-coated endocytic vesicle membrane [GO:0030669];clathrin-coated vesicle [GO:0030136];clathrin coat of coated pit [GO:0030132];clathrin coat of trans-Golgi network vesicle [GO:0030130];clathrin complex [GO:0071439];cytosol [GO:0005829];endolysosome membrane [GO:0036020];extracellular exosome [GO:0070062];extracellular vesicle [GO:1903561];focal adhesion [GO:00059…	GO:0019886;GO:0030118;GO:0030132;GO:0030130;GO:0071439;GO:0032051;GO:0030669;GO:0030136;GO:0005829;GO:0003725;GO:0036020;GO:0070062;GO:1903561;GO:0005925;GO:0043231;GO:0006886;GO:0042470;GO:0016020;GO:0061024;GO:0007067;GO:1900126;GO:1903077;GO:0001649;GO:0005886;GO:0044822;GO:0006892;GO:0043234;GO:0019901;GO:0031623;GO:0006898;GO:0042147;GO:0005819;GO:0005198;GO:0032588;GO:0033572;GO:0030132;GO:…
23.2716	22.4965	21.3072	22.2324	20.3218	22.5419	22.3358	22.6177	22.4057	26.3078	26.6602	26.676	20.9575	22.0061	21.3191	22.7278	27.3141	27.2505	27.8559	27.7843	1343000000	44	11	19.1		NaN	NaN	+	3.15223	3.79916	+	6.09696	4.64059	A0A087WW65;O75027;B4DGL8	A0A087WW65;O75027;B4DGL8	ATP-binding cassette sub-family B member 7, mitochondrial	ABCB7	78.287	cellular iron ion homeostasis [GO:0006879];heme transport [GO:0015886];small molecule metabolic process [GO:0044281];transmembrane transport [GO:0055085];transport [GO:0006810]	ATPase activity, coupled to transmembrane movement of substances [GO:0042626];ATP binding [GO:0005524];heme transporter activity [GO:0015232];ATPase activity, coupled to transmembrane movement of substances [GO:0042626];ATP binding [GO:0005524];ATPase activity, coupled to transmembrane movement of substances [GO:0042626];ATP binding [GO:0005524]	integral component of membrane [GO:0016021];mitochondrial inner membrane [GO:0005743];mitochondrion [GO:0005739];integral component of membrane [GO:0016021];mitochondrion [GO:0005739];integral component of membrane [GO:0016021]	GO:0005524;GO:0042626;GO:0006879;GO:0015886;GO:0015232;GO:0016021;GO:0005743;GO:0005739;GO:0044281;GO:0055085;GO:0006810;GO:0005524;GO:0042626;GO:0016021;GO:0005739;GO:0005524;GO:0042626;GO:0016021
22.7286	21.6715	22.3058	22.013	22.2332	22.3404	24.4304	24.4129	22.9224	21.5487	21.9454	24.7596	24.0132	23.2027	24.873	24.1787	24.95	24.0465	23.524	23.49	206760000	26	5	16.9		NaN	NaN		NaN	NaN		0.124018	0.232679	A0A087WWF6;P49005;F8W8R3;C9JLE1;C9IZD2;C9J8Z7;C9JHC7;H7C1B3	A0A087WWF6;P49005;F8W8R3;C9JLE1	DNA polymerase delta subunit 2	POLD2	54.695	base-excision repair [GO:0006284];DNA damage response, detection of DNA damage [GO:0042769];DNA repair [GO:0006281];DNA replication [GO:0006260];DNA strand elongation involved in DNA replication [GO:0006271];global genome nucleotide-excision repair [GO:0070911];mismatch repair [GO:0006298];mitotic cell cycle [GO:0000278];nucleotide-excision repair [GO:0006289];nucleotide-excision repair, DNA gap …	DNA binding [GO:0003677];DNA-directed DNA polymerase activity [GO:0003887];DNA binding [GO:0003677];DNA-directed DNA polymerase activity [GO:0003887];DNA binding [GO:0003677];DNA-directed DNA polymerase activity [GO:0003887];DNA binding [GO:0003677];DNA-directed DNA polymerase activity [GO:0003887];DNA binding [GO:0003677];DNA-directed DNA polymerase activity [GO:0003887]	nucleoplasm [GO:0005654];nucleus [GO:0005634];nucleoplasm [GO:0005654];nucleoplasm [GO:0005654]	GO:0003677;GO:0042769;GO:0006281;GO:0006260;GO:0006271;GO:0003887;GO:0006284;GO:0070911;GO:0006298;GO:0000278;GO:0005654;GO:0006289;GO:0006297;GO:0033683;GO:0005634;GO:0000723;GO:0000722;GO:0032201;GO:0006283;GO:0019985;GO:0003677;GO:0006260;GO:0003887;GO:0005654;GO:0003677;GO:0006261;GO:0003887;GO:0005654;GO:0003677;GO:0006260;GO:0003887;GO:0003677;GO:0006260;GO:0003887
23.0533	22.6705	22.1121	22.6153	23.1948	24.5342	22.0078	22.7686	22.2932	22.9064	22.0454	23.1424	24.1614	23.5963	23.779	23.6123	23.576	23.4779	23.7808	23.6978	149010000	18	7	12.3		NaN	NaN		NaN	NaN		0.47391	-0.154125	A0A087WWS1;Q96FV9;R4GMN4;A0A087WY84;J3KRD7;R4GN58;J3QQZ3	A0A087WWS1;Q96FV9;R4GMN4	THO complex subunit 1	THOC1	75.651	apoptotic process [GO:0006915];mRNA export from nucleus [GO:0006406];mRNA processing [GO:0006397];negative regulation of DNA damage checkpoint [GO:2000002];negative regulation of isotype switching to IgA isotypes [GO:0048297];positive regulation of DNA-templated transcription, elongation [GO:0032786];regulation of DNA recombination [GO:0000018];regulation of DNA-templated transcription, elongatio…	DNA binding [GO:0003677];RNA binding [GO:0003723]	cytoplasm [GO:0005737];intercellular bridge [GO:0045171];nuclear matrix [GO:0016363];nuclear speck [GO:0016607];nucleoplasm [GO:0005654];nucleus [GO:0005634];THO complex [GO:0000347];THO complex part of transcription export complex [GO:0000445];transcription export complex [GO:0000346]	GO:0003677;GO:0003723;GO:0006396;GO:0008380;GO:0000347;GO:0000445;GO:0006915;GO:0005737;GO:0045171;GO:0006406;GO:0006397;GO:2000002;GO:0048297;GO:0016363;GO:0016607;GO:0005654;GO:0005634;GO:0032786;GO:0000018;GO:0032784;GO:0031297;GO:0007165;GO:0000346;GO:0006351;GO:0046784;GO:0007165
21.9399	22.1531	23.4314	22.5584	22.6503	21.9916	22.765	21.4797	21.0519	22.1926	22.5074	21.6401	23.7321	24.4901	23.3235	24.0311	24.7282	23.8725	23.4475	23.9936	170870000	20	8	21.2		NaN	NaN		NaN	NaN		0.119561	0.116251	A0A087WWS7;Q15833;M0R1A1;M0R376;M0R0M7;M0QZ54;R4GMY7;M0R118	A0A087WWS7;Q15833;M0R1A1	Syntaxin-binding protein 2	STXBP2	64.705	leukocyte mediated cytotoxicity [GO:0001909];neutrophil degranulation [GO:0043312];protein transport [GO:0015031];regulation of mast cell degranulation [GO:0043304];vesicle docking involved in exocytosis [GO:0006904];vesicle docking involved in exocytosis [GO:0006904];vesicle docking involved in exocytosis [GO:0006904];vesicle docking involved in exocytosis [GO:0006904];vesicle docking involved i…	syntaxin-3 binding [GO:0030348]	apical plasma membrane [GO:0016324];azurophil granule [GO:0042582];cytolytic granule [GO:0044194];cytosol [GO:0005829];extracellular exosome [GO:0070062];plasma membrane [GO:0005886];specific granule [GO:0042581];tertiary granule [GO:0070820];cell [GO:0005623];cell [GO:0005623];cell [GO:0005623];cell [GO:0005623];cell [GO:0005623];cell [GO:0005623];cell [GO:0005623]	GO:0016324;GO:0042582;GO:0044194;GO:0005829;GO:0070062;GO:0001909;GO:0043312;GO:0005886;GO:0015031;GO:0043304;GO:0042581;GO:0030348;GO:0070820;GO:0006904;GO:0005623;GO:0006904;GO:0005623;GO:0006904;GO:0005623;GO:0006904;GO:0005623;GO:0006904;GO:0005623;GO:0006904;GO:0005623;GO:0006904;GO:0005623;GO:0006904
22.8285	21.8491	22.3055	21.905	22.2078	22.2585	23.463	24.2479	23.5376	22.7318	21.9171	21.9593	24.8677	22.3487	23.5905	25.137	22.5095	22.5454	25.0381	22.5528	268280000	18	4	18.1		NaN	NaN		1.2149	-0.979022		NaN	NaN	A0A087WWU8;Q5HYB6;D6R904;Q5VU61;H0YL80;K7EP68;H0YKX5;H0YKP3;K7ERG3;K7ENT6;H0YNC7;F5H7S3;H7BYY1;H0YK48;H0YL52;B7Z596;Q5TCU3;CON__Q3SX28;Q5TCU8;Q6ZN40;P09493;P07951	A0A087WWU8;Q5HYB6;D6R904;Q5VU61		TPM3;DKFZp686J1372	26.42	cardiac muscle contraction [GO:0060048];cellular response to reactive oxygen species [GO:0034614];cytoskeleton organization [GO:0007010];in utero embryonic development [GO:0001701];movement of cell or subcellular component [GO:0006928];muscle contraction [GO:0006936];muscle filament sliding [GO:0030049];negative regulation of cell migration [GO:0030336];negative regulation of vascular associated …	actin binding [GO:0003779];cytoskeletal protein binding [GO:0008092];structural constituent of cytoskeleton [GO:0005200];structural constituent of muscle [GO:0008307];actin binding [GO:0003779];structural constituent of muscle [GO:0008307]	bleb [GO:0032059];cytoskeleton [GO:0005856];cytosol [GO:0005829];filamentous actin [GO:0031941];muscle thin filament tropomyosin [GO:0005862];ruffle membrane [GO:0032587];sarcomere [GO:0030017];stress fiber [GO:0001725];cytosol [GO:0005829];muscle thin filament tropomyosin [GO:0005862];integral component of membrane [GO:0016021]	GO:0003779;GO:0032059;GO:0060048;GO:0034614;GO:0008092;GO:0005856;GO:0007010;GO:0005829;GO:0031941;GO:0001701;GO:0006928;GO:0006936;GO:0030049;GO:0005862;GO:0030336;GO:1904753;GO:1904706;GO:0032781;GO:0045785;GO:0003065;GO:0051496;GO:0008360;GO:0008016;GO:0006937;GO:0032587;GO:0031529;GO:0030017;GO:0045214;GO:0001725;GO:0005200;GO:0008307;GO:0055010;GO:0042060;GO:0003779;GO:0005829;GO:0006936;GO:…
24.9113	24.9257	25.0657	25.2241	25.1832	25.2621	22.7951	22.3772	22.7731	21.5994	21.6675	22.5798	22.437	21.7322	21.255	22.0205	22.6516	22.1086	22.1876	22.2824	111420000	17	5	19.4		2.03444	0.255567		NaN	NaN		NaN	NaN	A0A087WXC5;E7ESZ7;O95299;Q8N1B9;C9J6X0;H7C2W5;H7C1Y7;H7C2X4	A0A087WXC5;E7ESZ7;O95299	NADH dehydrogenase [ubiquinone] 1 alpha subcomplex subunit 10, mitochondrial	NDUFA10	40.836	cellular metabolic process [GO:0044237];mitochondrial electron transport, NADH to ubiquinone [GO:0006120];mitochondrial respiratory chain complex I assembly [GO:0032981];respiratory electron transport chain [GO:0022904];response to drug [GO:0042493];small molecule metabolic process [GO:0044281]	NADH dehydrogenase (ubiquinone) activity [GO:0008137]	mitochondrial inner membrane [GO:0005743];mitochondrial matrix [GO:0005759];mitochondrial respiratory chain complex I [GO:0005747];myelin sheath [GO:0043209]	GO:0008137;GO:0044237;GO:0006120;GO:0005743;GO:0005759;GO:0005747;GO:0032981;GO:0043209;GO:0022904;GO:0042493;GO:0044281
22.3223	21.6437	22.8067	21.7437	22.1247	22.0505	22.0962	22.2135	22.578	21.4214	22.8104	23.1614	24.0398	23.6584	22.6506	23.4544	24.2574	24.0233	22.6875	22.9233	155080000	9	3	9.2		NaN	NaN		NaN	NaN		0.205612	-0.355604	A0A087WXI1;Q6NVY1;B9A058;H7C126	A0A087WXI1;Q6NVY1;B9A058	3-hydroxyisobutyryl-CoA hydrolase, mitochondrial	HIBCH	42.846	branched-chain amino acid catabolic process [GO:0009083];cellular nitrogen compound metabolic process [GO:0034641];small molecule metabolic process [GO:0044281];valine catabolic process [GO:0006574]	3-hydroxyisobutyryl-CoA hydrolase activity [GO:0003860];hydro-lyase activity [GO:0016836];hydro-lyase activity [GO:0016836];hydro-lyase activity [GO:0016836];hydro-lyase activity [GO:0016836]	extracellular exosome [GO:0070062];mitochondrial matrix [GO:0005759]	GO:0003860;GO:0009083;GO:0034641;GO:0070062;GO:0016836;GO:0005759;GO:0044281;GO:0006574;GO:0016836;GO:0016836;GO:0016836
27.8438	28.2443	28.1287	28.0473	28.3022	28.3107	27.2658	27.1442	27.2652	27.2852	27.4448	27.3381	26.9252	27.6153	28.7722	27.7414	27.2722	27.7326	27.982	27.3988	2930700000	62	6	40.8		0.429702	0.1478		0.991289	0.130967		0.154744	-0.167125	A0A087WXM6;J3QQT2;J3KRX5;A0A0A6YYL6;P18621;J3QLC8;A0A0A0MRF8;J3KRB3;A0A087WWH0;J3QS96;A0A087WY81;J3KSJ0	A0A087WXM6;J3QQT2;J3KRX5;A0A0A6YYL6;P18621;J3QLC8;A0A0A0MRF8;J3KRB3;A0A087WWH0;J3QS96;A0A087WY81	60S ribosomal protein L17	RPL17;RPL17-C18orf32	19.586	cellular nitrogen compound metabolic process [GO:0034641];cellular protein metabolic process [GO:0044267];gene expression [GO:0010467];nuclear-transcribed mRNA catabolic process, nonsense-mediated decay [GO:0000184];selenium compound metabolic process [GO:0001887];selenocysteine metabolic process [GO:0016259];small molecule metabolic process [GO:0044281];SRP-dependent cotranslational protein targ…	poly(A) RNA binding [GO:0044822];structural constituent of ribosome [GO:0003735];structural constituent of ribosome [GO:0003735];structural constituent of ribosome [GO:0003735];structural constituent of ribosome [GO:0003735];structural constituent of ribosome [GO:0003735];structural constituent of ribosome [GO:0003735];structural constituent of ribosome [GO:0003735];structural constituent of ribo…	cytosol [GO:0005829];cytosolic large ribosomal subunit [GO:0022625];nucleus [GO:0005634];large ribosomal subunit [GO:0015934];large ribosomal subunit [GO:0015934];large ribosomal subunit [GO:0015934];large ribosomal subunit [GO:0015934];large ribosomal subunit [GO:0015934];large ribosomal subunit [GO:0015934];large ribosomal subunit [GO:0015934];large ribosomal subunit [GO:0015934];large ribosoma…	GO:0006614;GO:0034641;GO:0044267;GO:0005829;GO:0022625;GO:0010467;GO:0000184;GO:0005634;GO:0044822;GO:0001887;GO:0016259;GO:0044281;GO:0003735;GO:0006412;GO:0006414;GO:0006413;GO:0006415;GO:0019058;GO:0016032;GO:0019083;GO:0015934;GO:0003735;GO:0006412;GO:0015934;GO:0003735;GO:0006412;GO:0015934;GO:0003735;GO:0006412;GO:0015934;GO:0003735;GO:0006412;GO:0015934;GO:0003735;GO:0006412;GO:0015934;GO:…
22.4268	23.3936	22.8599	22.5361	21.4371	22.242	23.631	23.5512	23.5706	22.9108	22.5751	23.6085	22.9239	22.4301	22.0053	23.2333	22.095	22.5166	23.4607	20.9033	20394000	5	3	9.3		NaN	NaN		0.267466	-0.0854899		NaN	NaN	A0A087WXR7;Q5TBB1;A0A087WZJ6	A0A087WXR7;Q5TBB1;A0A087WZJ6	Ribonuclease H2 subunit B	RNASEH2B	37.474	in utero embryonic development [GO:0001701];negative regulation of gene expression [GO:0010629];positive regulation of fibroblast proliferation [GO:0048146];regulation of DNA damage checkpoint [GO:2000001];regulation of G2/M transition of mitotic cell cycle [GO:0010389];ribonucleotide metabolic process [GO:0009259];RNA catabolic process [GO:0006401]	RNA-DNA hybrid ribonuclease activity [GO:0004523]	nucleus [GO:0005634];ribonuclease H2 complex [GO:0032299];nucleus [GO:0005634]	GO:0006401;GO:0004523;GO:0001701;GO:0010629;GO:0005634;GO:0048146;GO:2000001;GO:0010389;GO:0032299;GO:0009259;GO:0005634
22.3423	21.9266	21.7096	24.4717	22.5869	24.4997	23.3173	22.8035	22.7788	24.3193	24.6361	25.1469	21.9447	20.3944	22.8438	23.0347	24.1747	24.3216	25.0521	24.9126	184010000	23	3	10.6		NaN	NaN		2.16627	1.77492		2.95013	1.64997	A0A087WXS7;O43681;K7ERW9	A0A087WXS7;O43681	ATPase ASNA1	ASNA1	37.119	cellular protein metabolic process [GO:0044267];endoplasmic reticulum unfolded protein response [GO:0030968];inorganic anion transport [GO:0015698];IRE1-mediated unfolded protein response [GO:0036498];protein insertion into ER membrane [GO:0045048];transport [GO:0006810];protein insertion into ER membrane [GO:0045048];transport [GO:0006810]	arsenite transmembrane transporter activity [GO:0015105];ATPase activity [GO:0016887];ATP binding [GO:0005524];metal ion binding [GO:0046872];transporter activity [GO:0005215];ATPase activity [GO:0016887];ATP binding [GO:0005524];ATPase activity [GO:0016887];ATP binding [GO:0005524];metal ion binding [GO:0046872]	cytoplasm [GO:0005737];endoplasmic reticulum membrane [GO:0005789];extracellular exosome [GO:0070062];nucleolus [GO:0005730];nucleus [GO:0005634];nucleolus [GO:0005730];nucleus [GO:0005634];endoplasmic reticulum [GO:0005783];nucleolus [GO:0005730]	GO:0005524;GO:0016887;GO:0036498;GO:0015105;GO:0044267;GO:0005737;GO:0005789;GO:0030968;GO:0070062;GO:0015698;GO:0046872;GO:0005730;GO:0005634;GO:0045048;GO:0006810;GO:0005215;GO:0005524;GO:0016887;GO:0005730;GO:0005634;GO:0005524;GO:0016887;GO:0005783;GO:0046872;GO:0005730;GO:0045048;GO:0006810
22.3659	21.8864	21.4123	22.1126	22.1212	23.4905	21.9864	22.4472	22.7457	21.5484	22.4577	22.1459	23.1336	23.2971	23.6415	23.0334	23.3034	23.3037	21.8193	23.8574	119860000	19	5	9.5		NaN	NaN		NaN	NaN		0.174685	-0.20545	A0A087WXZ3;Q9Y5A9;Q9BYJ9;S4R3J8;S4R3V3	A0A087WXZ3;Q9Y5A9	YTH domain-containing family protein 2	YTHDF2	61.163	humoral immune response [GO:0006959];positive regulation of cap-independent translational initiation [GO:1903679];regulation of mRNA stability [GO:0043488];positive regulation of translational initiation [GO:0045948]	N6-methyladenosine-containing RNA binding [GO:1990247];poly(A) RNA binding [GO:0044822];N6-methyladenosine-containing RNA binding [GO:1990247];poly(A) RNA binding [GO:0044822];ribosome binding [GO:0043022]	cytoplasm [GO:0005737];cytoplasmic mRNA processing body [GO:0000932];cytosol [GO:0005829];nucleus [GO:0005634];cytoplasm [GO:0005737]	GO:1990247;GO:0005737;GO:0000932;GO:0005829;GO:0006959;GO:0005634;GO:0044822;GO:1903679;GO:0043488;GO:1990247;GO:0005737;GO:0044822;GO:0045948;GO:0043022
23.7611	23.8683	24.0129	23.6232	23.7039	23.8593	22.4032	22.2216	22.0687	22.9473	21.0047	21.4947	21.9192	22.2861	23.3555	23.6826	21.5744	22.573	21.8954	21.1096	24589000	10	4	2.8		0.687287	-0.151967		NaN	NaN		NaN	NaN	A0A087WY00;G3V394;F8WE88;F8W6H6;Q9Y4I1;E7ERV5;Q9UES5;O95317	A0A087WY00;G3V394;F8WE88;F8W6H6;Q9Y4I1;E7ERV5	Unconventional myosin-Va	MYO5A	212.2	actin filament-based movement [GO:0030048];cellular protein metabolic process [GO:0044267];cellular response to insulin stimulus [GO:0032869];endoplasmic reticulum localization [GO:0051643];exocytosis [GO:0006887];insulin secretion [GO:0030073];locomotion involved in locomotory behavior [GO:0031987];long-chain fatty acid biosynthetic process [GO:0042759];melanin biosynthetic process [GO:0042438];…	ATP binding [GO:0005524];calcium ion binding [GO:0005509];microfilament motor activity [GO:0000146];poly(A) RNA binding [GO:0044822];Rab GTPase binding [GO:0017137];ATP binding [GO:0005524];motor activity [GO:0003774];ATP binding [GO:0005524];motor activity [GO:0003774];ATP binding [GO:0005524];motor activity [GO:0003774];ATP binding [GO:0005524];motor activity [GO:0003774]	actomyosin [GO:0042641];cytoplasm [GO:0005737];cytosol [GO:0005829];extracellular exosome [GO:0070062];filopodium tip [GO:0032433];Golgi apparatus [GO:0005794];growth cone [GO:0030426];insulin-responsive compartment [GO:0032593];intermediate filament [GO:0005882];melanosome [GO:0042470];membrane [GO:0016020];microtubule plus-end [GO:0035371];myosin complex [GO:0016459];neuronal cell body [GO:0043…	GO:0005524;GO:0005794;GO:0017137;GO:0030048;GO:0042641;GO:0005509;GO:0044267;GO:0032869;GO:0005737;GO:0005829;GO:0051643;GO:0006887;GO:0070062;GO:0032433;GO:0030426;GO:0030073;GO:0032593;GO:0005882;GO:0031987;GO:0042759;GO:0042438;GO:0030318;GO:0042470;GO:0032402;GO:0016020;GO:0061024;GO:0000146;GO:0035371;GO:0042552;GO:0016459;GO:0043005;GO:0043025;GO:0042476;GO:0001750;GO:0044822;GO:0006892;GO:…
22.0369	22.6712	22.2256	22.0911	23.2075	22.1257	22.6656	23.0041	23.1399	22.4452	20.8397	22.0128	21.8248	22.213	22.1285	21.3984	26.419	26.2558	26.4089	26.5206	507220000	14	5	22.6		NaN	NaN		NaN	NaN	+	3.84492	3.2701	A0A087WY12;Q9BQT8	A0A087WY12;Q9BQT8	Mitochondrial 2-oxodicarboxylate carrier	SLC25A21	26.094	cellular nitrogen compound metabolic process [GO:0034641];lysine catabolic process [GO:0006554];small molecule metabolic process [GO:0044281];translation [GO:0006412];transmembrane transport [GO:0055085];transport [GO:0006810]	structural constituent of ribosome [GO:0003735]	integral component of membrane [GO:0016021];mitochondrial inner membrane [GO:0005743];integral component of membrane [GO:0016021]	GO:0034641;GO:0016021;GO:0006554;GO:0005743;GO:0044281;GO:0003735;GO:0006412;GO:0055085;GO:0016021;GO:0006810
26.3631	26.5648	26.5097	26.4937	26.4692	26.4594	25.8511	25.7323	25.9649	25.6052	25.8904	26.0248	26.1944	25.9349	25.4304	25.4004	24.8571	25.4607	25.594	25.5938	826120000	78	10	28.1		0.0280601	-0.00510025		0.0220521	-0.00930023		0.666917	-0.363626	A0A087WY71;E9PFW3;Q96CW1;C9JJ47;H7C4C3;C9JJD3;C9JPV8;C9JTK4;C9JGT8	A0A087WY71;E9PFW3;Q96CW1	AP-2 complex subunit mu	AP2M1	49.526	antigen processing and presentation of exogenous peptide antigen via MHC class II [GO:0019886];axon guidance [GO:0007411];clathrin-mediated endocytosis [GO:0072583];ephrin receptor signaling pathway [GO:0048013];epidermal growth factor receptor signaling pathway [GO:0007173];intracellular protein transport [GO:0006886];membrane organization [GO:0061024];negative regulation of epidermal growth fac…	ion channel binding [GO:0044325];lipid binding [GO:0008289];low-density lipoprotein particle receptor binding [GO:0050750];signal sequence binding [GO:0005048];transporter activity [GO:0005215];lipid binding [GO:0008289];lipid binding [GO:0008289]	AP-2 adaptor complex [GO:0030122];clathrin-coated endocytic vesicle membrane [GO:0030669];cytosol [GO:0005829];endocytic vesicle membrane [GO:0030666];endolysosome membrane [GO:0036020];extracellular exosome [GO:0070062];lysosomal membrane [GO:0005765];mitochondrion [GO:0005739];plasma membrane [GO:0005886];terminal bouton [GO:0043195];clathrin adaptor complex [GO:0030131];clathrin adaptor comple…	GO:0030122;GO:0019886;GO:0007411;GO:0030669;GO:0072583;GO:0005829;GO:0030666;GO:0036020;GO:0048013;GO:0007173;GO:0070062;GO:0006886;GO:0044325;GO:0008289;GO:0050750;GO:0005765;GO:0061024;GO:0005739;GO:0042059;GO:1903077;GO:0048011;GO:0005886;GO:0050690;GO:0005048;GO:0007268;GO:0043195;GO:0005215;GO:0016032;GO:0030131;GO:0006886;GO:0008289;GO:0016192;GO:0030131;GO:0006886;GO:0016192;GO:0030131;GO:…
26.2146	26.6281	26.4701	25.8348	26.3011	26.2778	27.1056	26.9708	26.9139	26.8827	26.6446	26.8016	28.0245	28.3468	28.3439	27.7605	27.8986	27.4539	27.7111	27.8371	2767700000	192	22	23.4		0.706105	-0.2997		1.1509	-0.220467		1.20504	-0.393751	A0A087WYK8;B1AKJ5;O43847;G3V1R5;F5H7V1;H0Y5G9	A0A087WYK8;B1AKJ5;O43847;G3V1R5;F5H7V1	Nardilysin	NRD1	131.14	cell migration [GO:0016477];cell proliferation [GO:0008283];neuromuscular junction development [GO:0007528];positive regulation of membrane protein ectodomain proteolysis [GO:0051044];protein processing [GO:0016485];proteolysis [GO:0006508];regulation of endopeptidase activity [GO:0052548]	epidermal growth factor binding [GO:0048408];metalloendopeptidase activity [GO:0004222];zinc ion binding [GO:0008270];metal ion binding [GO:0046872];metalloendopeptidase activity [GO:0004222];metal ion binding [GO:0046872];metalloendopeptidase activity [GO:0004222];metal ion binding [GO:0046872];metalloendopeptidase activity [GO:0004222];metal ion binding [GO:0046872];metalloendopeptidase activit…	cell surface [GO:0009986];cytosol [GO:0005829];mitochondrion [GO:0005739]	GO:0016477;GO:0008283;GO:0009986;GO:0005829;GO:0048408;GO:0004222;GO:0007528;GO:0051044;GO:0016485;GO:0006508;GO:0052548;GO:0008270;GO:0046872;GO:0004222;GO:0046872;GO:0004222;GO:0005739;GO:0046872;GO:0004222;GO:0046872;GO:0004222;GO:0003824;GO:0046872
21.2448	25.0327	22.6232	24.831	24.4315	24.787	24.9379	24.6962	24.6402	25.1043	24.5826	24.5143	25.7988	25.5525	24.8777	24.1732	25.434	25.4162	25.3964	25.1639	569090000	52	10	9.1		0.663263	1.20627		0.0399173	-0.024367		0.28238	0.252075	A0A087WYN9;Q7Z478	A0A087WYN9;Q7Z478	ATP-dependent RNA helicase DHX29	DHX29	155.29	RNA processing [GO:0006396]	ATP binding [GO:0005524];ATP-dependent RNA helicase activity [GO:0004004];poly(A) RNA binding [GO:0044822];ribosomal small subunit binding [GO:0043024];translation initiation factor activity [GO:0003743];ATP binding [GO:0005524];ATP-dependent helicase activity [GO:0008026];nucleic acid binding [GO:0003676]	eukaryotic 43S preinitiation complex [GO:0016282];mitochondrion [GO:0005739]	GO:0005524;GO:0004004;GO:0006396;GO:0016282;GO:0005739;GO:0044822;GO:0043024;GO:0003743;GO:0005524;GO:0008026;GO:0003676
25.0189	24.4549	23.4527	24.5892	24.6839	24.7527	22.5347	21.7346	22.6324	22.3678	21.9749	22.5263	23.8429	21.9786	22.799	22.6304	22.3258	22.7501	23.0446	22.8621	88399000	19	5	15		0.337125	0.406334		NaN	NaN		NaN	NaN	A0A087WYS1;E7EUC7;Q16851;C9JWG0;C9JVG3;C9JQU9;C9JNZ1;C9JTZ5;C9JUW1	A0A087WYS1;E7EUC7;Q16851;C9JWG0;C9JVG3;C9JQU9;C9JNZ1	UTP--glucose-1-phosphate uridylyltransferase	UGP2	56.967	carbohydrate metabolic process [GO:0005975];cellular glucuronidation [GO:0052695];glucose 1-phosphate metabolic process [GO:0019255];glucose metabolic process [GO:0006006];glycogen biosynthetic process [GO:0005978];small molecule metabolic process [GO:0044281];UDP-glucose metabolic process [GO:0006011];UDP-glucuronate biosynthetic process [GO:0006065];xenobiotic metabolic process [GO:0006805];UDP…	glucose binding [GO:0005536];identical protein binding [GO:0042802];metal ion binding [GO:0046872];pyrimidine ribonucleotide binding [GO:0032557];UTP:glucose-1-phosphate uridylyltransferase activity [GO:0003983];uridylyltransferase activity [GO:0070569];uridylyltransferase activity [GO:0070569];UTP:glucose-1-phosphate uridylyltransferase activity [GO:0003983];uridylyltransferase activity [GO:0070…	cytosol [GO:0005829];extracellular exosome [GO:0070062];nucleus [GO:0005634]	GO:0006011;GO:0006065;GO:0003983;GO:0005975;GO:0052695;GO:0005829;GO:0070062;GO:0019255;GO:0005536;GO:0006006;GO:0005978;GO:0042802;GO:0046872;GO:0005634;GO:0032557;GO:0044281;GO:0006805;GO:0070569;GO:0070569;GO:0006011;GO:0003983;GO:0070569;GO:0070569;GO:0070569;GO:0070569;GO:0006011;GO:0003983
21.7756	21.875	23.1568	23.4511	22.5622	21.9759	22.8387	22.593	21.5359	22.4491	21.5124	21.9374	25.4958	26.1957	26.3716	22.3855	25.9948	26.3218	25.8505	25.8319	657940000	26	5	28		NaN	NaN		NaN	NaN		0.424751	0.980304	A0A087WYT3;Q15185;B4DDC6	A0A087WYT3;Q15185;B4DDC6	Prostaglandin E synthase 3	PTGES3	19.155	arachidonic acid metabolic process [GO:0019369];cellular response to heat [GO:0034605];chaperone cofactor-dependent protein refolding [GO:0070389];cyclooxygenase pathway [GO:0019371];prostaglandin biosynthetic process [GO:0001516];regulation of cellular response to heat [GO:1900034];RNA-dependent DNA replication [GO:0006278];signal transduction [GO:0007165];small molecule metabolic process [GO:00…	prostaglandin-E synthase activity [GO:0050220];telomerase activity [GO:0003720];unfolded protein binding [GO:0051082]	chromosome, telomeric region [GO:0000781];cytoplasm [GO:0005737];cytosol [GO:0005829];extracellular exosome [GO:0070062];nucleoplasm [GO:0005654];nucleus [GO:0005634];telomerase holoenzyme complex [GO:0005697];cytoplasm [GO:0005737];nucleoplasm [GO:0005654]	GO:0006278;GO:0019369;GO:0034605;GO:0070389;GO:0000781;GO:0019371;GO:0005737;GO:0005829;GO:0070062;GO:0005654;GO:0005634;GO:0001516;GO:0050220;GO:1900034;GO:0007165;GO:0044281;GO:0003720;GO:0005697;GO:0000723;GO:0051082;GO:0005737;GO:0005654;GO:0008283;GO:0042921;GO:0005978;GO:0060430;GO:0043588
22.8633	22.4104	21.9313	21.6262	22.3492	22.1462	22.051	21.7787	22.1068	22.8739	22.5264	20.607	24.3728	24.706	24.4269	24.2588	24.0176	24.5996	24.5862	24.3322	219270000	18	6	12.1		NaN	NaN		NaN	NaN		0.12915	-0.0572257	A0A087WYU1;Q9Y5X1;A0A087WVE4;A0A087WZW2	A0A087WYU1;Q9Y5X1	Sorting nexin;Sorting nexin-9	SNX9	66.476	cleavage furrow formation [GO:0036089];endocytosis [GO:0006897];endosomal transport [GO:0016197];intracellular protein transport [GO:0006886];lipid tube assembly [GO:0060988];membrane tubulation [GO:0097320];mitotic cytokinesis [GO:0000281];mitotic nuclear division [GO:0007067];positive regulation of GTPase activity [GO:0043547];positive regulation of membrane protein ectodomain proteolysis [GO:0…	1-phosphatidylinositol binding [GO:0005545];Arp2/3 complex binding [GO:0071933];phosphatidylinositol binding [GO:0035091];protein homodimerization activity [GO:0042803];ubiquitin protein ligase binding [GO:0031625];phosphatidylinositol binding [GO:0035091]	clathrin-coated vesicle [GO:0030136];cytoplasm [GO:0005737];cytoplasmic, membrane-bounded vesicle [GO:0016023];cytoplasmic vesicle membrane [GO:0030659];endosome [GO:0005768];extracellular exosome [GO:0070062];extrinsic component of cytoplasmic side of plasma membrane [GO:0031234];plasma membrane [GO:0005886];ruffle [GO:0001726];trans-Golgi network [GO:0005802];cytoplasmic vesicle membrane [GO:00…	GO:0005545;GO:0071933;GO:0030136;GO:0036089;GO:0005737;GO:0030659;GO:0016023;GO:0006897;GO:0016197;GO:0005768;GO:0070062;GO:0031234;GO:0006886;GO:0060988;GO:0097320;GO:0000281;GO:0007067;GO:0035091;GO:0005886;GO:0043547;GO:0051044;GO:0045860;GO:0032461;GO:0042803;GO:0006898;GO:0001726;GO:0005802;GO:0031625;GO:0016050;GO:0030659;GO:0006897;GO:0006886;GO:0000281;GO:0007067;GO:0035091
23.3564	22.8232	22.4256	23.0392	21.7548	22.7732	25.735	26.3369	26.5784	21.9777	21.36	22.7827	25.7733	25.7073	26.1017	26.3651	26.3338	25.8476	25.7673	25.8687	891130000	49	12	26.8		NaN	NaN	+	3.02467	-2.52163		0.057519	-0.0325003	A0A087WZ13;E9PAU2;Q8IY67;K7EKR9;K7EQG2	A0A087WZ13;E9PAU2;Q8IY67	Ribonucleoprotein PTB-binding 1	RAVER1	77.843	mRNA splicing, via spliceosome [GO:0000398];mRNA splicing, via spliceosome [GO:0000398]	nucleic acid binding [GO:0003676];nucleotide binding [GO:0000166];poly(A) RNA binding [GO:0044822];nucleic acid binding [GO:0003676];nucleotide binding [GO:0000166];nucleotide binding [GO:0000166];nucleic acid binding [GO:0003676];nucleotide binding [GO:0000166];nucleic acid binding [GO:0003676]	cytoplasm [GO:0005737];nucleus [GO:0005634];nucleus [GO:0005634]	GO:0005737;GO:0000398;GO:0003676;GO:0000166;GO:0005634;GO:0044822;GO:0003676;GO:0000166;GO:0000166;GO:0003676;GO:0000166;GO:0000398;GO:0003676;GO:0005634
22.6104	21.4074	22.9923	22.8998	22.263	22.1294	21.6799	21.7209	21.9437	23.4174	22.2009	22.1138	25.8661	25.9208	21.8863	26.3111	20.805	22.0942	22.8016	21.2034	1015100000	20	2	34		NaN	NaN		NaN	NaN		NaN	NaN	M0QX76;M0R1M5;M0R3H0;M0R210;A0A087WZ27;Q6IPX4;P62249	M0QX76;M0R1M5;M0R3H0;M0R210;A0A087WZ27;Q6IPX4;P62249	40S ribosomal protein S16	RPS16;ZNF90	5.5575	cellular nitrogen compound metabolic process [GO:0034641];cellular protein metabolic process [GO:0044267];gene expression [GO:0010467];maturation of SSU-rRNA from tricistronic rRNA transcript (SSU-rRNA, 5.8S rRNA, LSU-rRNA) [GO:0000462];nuclear-transcribed mRNA catabolic process, nonsense-mediated decay [GO:0000184];ribosomal small subunit biogenesis [GO:0042274];rRNA processing [GO:0006364];sele…	poly(A) RNA binding [GO:0044822];RNA binding [GO:0003723];structural constituent of ribosome [GO:0003735];structural constituent of ribosome [GO:0003735];structural constituent of ribosome [GO:0003735];structural constituent of ribosome [GO:0003735];structural constituent of ribosome [GO:0003735];structural constituent of ribosome [GO:0003735];structural constituent of ribosome [GO:0003735]	cytosol [GO:0005829];cytosolic small ribosomal subunit [GO:0022627];extracellular exosome [GO:0070062];focal adhesion [GO:0005925];membrane [GO:0016020];small ribosomal subunit [GO:0015935];ribosome [GO:0005840];ribosome [GO:0005840];ribosome [GO:0005840];ribosome [GO:0005840];ribosome [GO:0005840];ribosome [GO:0005840]	GO:0003723;GO:0006614;GO:0034641;GO:0044267;GO:0005829;GO:0022627;GO:0070062;GO:0005925;GO:0010467;GO:0000462;GO:0016020;GO:0000184;GO:0044822;GO:0006364;GO:0042274;GO:0001887;GO:0016259;GO:0044281;GO:0015935;GO:0003735;GO:0006412;GO:0006414;GO:0006413;GO:0006415;GO:0019058;GO:0016032;GO:0019083;GO:0005840;GO:0003735;GO:0006412;GO:0005840;GO:0003735;GO:0006412;GO:0005840;GO:0003735;GO:0006412;GO:…
22.4499	22.5487	22.2456	22.5695	22.7694	21.2871	21.8798	22.4687	23.2804	24.5012	24.8805	24.6614	21.6675	22.1415	22.2279	23.1604	24.5281	24.714	24.4467	24.5378	178580000	19	4	7		NaN	NaN		1.99149	1.80279	+	6.11288	2.72332	A0A087WZ62;Q9H6U8;H0YCW6;A0A087WTZ3;A0A087WV58;A0A087WVC0;A0A087WZY8	A0A087WZ62;Q9H6U8;H0YCW6	Alpha-1,2-mannosyltransferase ALG9	ALG9	95.921	cellular protein metabolic process [GO:0044267];dolichol-linked oligosaccharide biosynthetic process [GO:0006488];mannosylation [GO:0097502];post-translational protein modification [GO:0043687];protein N-linked glycosylation via asparagine [GO:0018279]	dol-P-Man:Man(6)GlcNAc(2)-PP-Dol alpha-1,2-mannosyltransferase activity [GO:0052926];dol-P-Man:Man(8)GlcNAc(2)-PP-Dol alpha-1,2-mannosyltransferase activity [GO:0052918];mannosyltransferase activity [GO:0000030];transferase activity, transferring glycosyl groups [GO:0016757];transferase activity, transferring glycosyl groups [GO:0016757];transferase activity, transferring glycosyl groups [GO:0016…	endoplasmic reticulum membrane [GO:0005789];integral component of membrane [GO:0016021];membrane [GO:0016020];integral component of membrane [GO:0016021];integral component of membrane [GO:0016021];integral component of membrane [GO:0016021]	GO:0044267;GO:0052926;GO:0052918;GO:0006488;GO:0005789;GO:0016021;GO:0097502;GO:0000030;GO:0016020;GO:0043687;GO:0018279;GO:0016021;GO:0016757;GO:0016757;GO:0016021;GO:0016757;GO:0016021;GO:0016757;GO:0016757;GO:0016757
21.5644	22.7168	22.2199	22.9403	21.9464	22.6059	21.2997	23.4009	23.5505	22.3685	22.3613	22.6079	27.2512	27.276	26.8733	26.8449	27.1973	26.8383	26.8941	27.0124	1355300000	113	31	19.5		NaN	NaN		NaN	NaN		0.213899	-0.0758247	A0A087WZE4;P02549;V9GY79	A0A087WZE4;P02549	Spectrin alpha chain, erythrocytic 1	SPTA1	281.11	actin filament capping [GO:0051693];actin filament organization [GO:0007015];activation of MAPKK activity [GO:0000186];axon guidance [GO:0007411];cellular protein metabolic process [GO:0044267];epidermal growth factor receptor signaling pathway [GO:0007173];ER to Golgi vesicle-mediated transport [GO:0006888];Fc-epsilon receptor signaling pathway [GO:0038095];fibroblast growth factor receptor sign…	actin filament binding [GO:0051015];calcium ion binding [GO:0005509];structural constituent of cytoskeleton [GO:0005200];calcium ion binding [GO:0005509]	actin cytoskeleton [GO:0015629];cuticular plate [GO:0032437];cytosol [GO:0005829];intrinsic component of the cytoplasmic side of the plasma membrane [GO:0031235];spectrin [GO:0008091];spectrin-associated cytoskeleton [GO:0014731]	GO:0006888;GO:0038095;GO:0000165;GO:0007265;GO:0015629;GO:0051015;GO:0051693;GO:0007015;GO:0000186;GO:0007411;GO:0005509;GO:0044267;GO:0032437;GO:0005829;GO:0007173;GO:0008543;GO:0030097;GO:0045087;GO:0008286;GO:0031235;GO:0002260;GO:0061024;GO:0048011;GO:0007009;GO:0006779;GO:0042102;GO:0032092;GO:0043687;GO:0018279;GO:0008360;GO:0007264;GO:0008091;GO:0014731;GO:0005200;GO:0048010;GO:0005509
24.1193	24.3218	24.2457	24.4383	24.407	24.0962	22.7808	22.1078	22.3554	22.3272	22.5679	21.9987	22.2192	22.1668	22.297	21.5111	23.2387	22.0775	20.803	22.3827	34356000	17	6	19.9		0.27442	0.0848993		NaN	NaN		NaN	NaN	C9JUT4;A0A087WZF1;Q93052;C9JXK9;C9JE51;C9J2R5;C9JIY7;C9JT42;C9J3U9;C9J1K7;C9J5C8;C9J4E3	C9JUT4;A0A087WZF1;Q93052;C9JXK9	Lipoma-preferred partner	LPP	45.345	cell adhesion [GO:0007155]	zinc ion binding [GO:0008270];zinc ion binding [GO:0008270]	cytoplasm [GO:0005737];focal adhesion [GO:0005925];nucleus [GO:0005634];plasma membrane [GO:0005886];cytoplasm [GO:0005737];focal adhesion [GO:0005925];cytoplasm [GO:0005737];focal adhesion [GO:0005925]	GO:0007155;GO:0005737;GO:0005925;GO:0005634;GO:0005886;GO:0008270;GO:0005737;GO:0005925;GO:0005737;GO:0005925;GO:0008270
25.0265	25.256	22.435	25.3059	25.4658	24.4149	21.4481	22.2873	21.8856	22.0639	21.6724	22.9181	23.4901	22.5084	23.2824	22.3788	23.5853	23.8623	23.002	23.204	171060000	32	5	17.8		0.311555	0.529324		NaN	NaN		NaN	NaN	A0A087X2E5;A0A087WZN1;O43837	A0A087X2E5;A0A087WZN1;O43837	Isocitrate dehydrogenase [NAD] subunit, mitochondrial;Isocitrate dehydrogenase [NAD] subunit beta, mitochondrial	IDH3B	41.219	2-oxoglutarate metabolic process [GO:0006103];cellular metabolic process [GO:0044237];isocitrate metabolic process [GO:0006102];NADH metabolic process [GO:0006734];small molecule metabolic process [GO:0044281];tricarboxylic acid cycle [GO:0006099];tricarboxylic acid cycle [GO:0006099];tricarboxylic acid cycle [GO:0006099]	electron carrier activity [GO:0009055];isocitrate dehydrogenase (NAD+) activity [GO:0004449];magnesium ion binding [GO:0000287];NAD binding [GO:0051287];isocitrate dehydrogenase (NAD+) activity [GO:0004449];magnesium ion binding [GO:0000287];NAD binding [GO:0051287];isocitrate dehydrogenase (NAD+) activity [GO:0004449];magnesium ion binding [GO:0000287];NAD binding [GO:0051287]	mitochondrial matrix [GO:0005759];mitochondrion [GO:0005739];nucleus [GO:0005634];mitochondrion [GO:0005739];mitochondrion [GO:0005739]	GO:0006103;GO:0051287;GO:0006734;GO:0044237;GO:0009055;GO:0004449;GO:0006102;GO:0000287;GO:0005759;GO:0005739;GO:0005634;GO:0044281;GO:0006099;GO:0051287;GO:0004449;GO:0000287;GO:0005739;GO:0006099;GO:0051287;GO:0004449;GO:0000287;GO:0005739;GO:0006099
24.1493	24.5749	24.6962	23.44	22.4218	21.7508	24.3003	24.5298	24.4932	24.3139	24.1039	24.2489	21.4632	23.0264	22.6865	22.5071	21.9807	22.7437	21.9869	23.1657	102020000	18	2	16.4		1.45401	-1.39156		1.0895	-0.218867		NaN	NaN	A0A087WZT3;Q9H3K6;H3BV85;H3BTW0;A0A0B4J295;H3BVE0	A0A087WZT3;Q9H3K6;H3BV85;H3BTW0;A0A0B4J295;H3BVE0	BolA-like protein 2	BOLA2;BOLA2B	16.932			extracellular exosome [GO:0070062]	GO:0070062
21.7115	21.9184	22.5396	22.7446	21.7983	22.3078	24.5853	24.3945	24.7303	21.9485	24.0315	22.7105	25.6662	25.5023	25.6981	25.6461	25.0575	25.3699	25.4626	25.9891	550090000	60	13	12.3		NaN	NaN		1.40494	-1.53662		0.341981	-0.1584	A0A087WZV0;O43314;H0Y9S9;D6RBU4;A0A087WWN8;F8W9A8;B7WPL9;Q6PFW1;H7C436;H0Y9M0;K7ENU7;D6RFG4	A0A087WZV0;O43314	Inositol hexakisphosphate and diphosphoinositol-pentakisphosphate kinase 2	PPIP5K2	144.36	inositol metabolic process [GO:0006020];inositol phosphate metabolic process [GO:0043647];small molecule metabolic process [GO:0044281];inositol metabolic process [GO:0006020];inositol phosphate metabolic process [GO:0043647];small molecule metabolic process [GO:0044281];inositol metabolic process [GO:0006020];inositol metabolic process [GO:0006020];inositol metabolic process [GO:0006020]	acid phosphatase activity [GO:0003993];ATP binding [GO:0005524];diphosphoinositol-pentakisphosphate kinase activity [GO:0033857];inositol-1,3,4,5,6-pentakisphosphate kinase activity [GO:0000827];inositol hexakisphosphate 1-kinase activity [GO:0052723];inositol hexakisphosphate 3-kinase activity [GO:0052724];inositol hexakisphosphate 5-kinase activity [GO:0000832];inositol hexakisphosphate kinase …	cytoplasm [GO:0005737];cytosol [GO:0005829];nucleoplasm [GO:0005654];plasma membrane [GO:0005886];cytosol [GO:0005829];cytoplasm [GO:0005737];cytosol [GO:0005829];nucleoplasm [GO:0005654];cytoplasm [GO:0005737];cytosol [GO:0005829];nucleoplasm [GO:0005654];cytosol [GO:0005829]	GO:0005524;GO:0003993;GO:0005737;GO:0005829;GO:0033857;GO:0052723;GO:0052724;GO:0000832;GO:0000828;GO:0006020;GO:0043647;GO:0000827;GO:0005654;GO:0005886;GO:0044281;GO:0005524;GO:0003993;GO:0005829;GO:0033857;GO:0052723;GO:0052724;GO:0000832;GO:0000828;GO:0006020;GO:0043647;GO:0000827;GO:0044281;GO:0003993;GO:0003993;GO:0003993;GO:0003993;GO:0005737;GO:0005829;GO:0033857;GO:0000832;GO:0006020;GO:…
23.8238	24.2197	24.3377	23.0209	21.2518	21.988	23.9355	24.1733	23.989	24.3093	24.3981	24.1818	23.1642	21.7746	21.3648	22.0404	22.9422	21.3659	21.4943	22.6333	354820000	22	3	16.4		1.98521	-1.30243		1.29422	0.2638		NaN	NaN	D6R9P3;D6RD18;D6RBZ0;A0A087WZV1;Q99729	D6R9P3;D6RD18;D6RBZ0;A0A087WZV1;Q99729	Heterogeneous nuclear ribonucleoprotein A/B	HNRNPAB	30.302	epithelial to mesenchymal transition [GO:0001837];negative regulation of transcription from RNA polymerase II promoter [GO:0000122];positive regulation of transcription, DNA-templated [GO:0045893]	mRNA binding [GO:0003729];nucleotide binding [GO:0000166];poly(A) RNA binding [GO:0044822];RNA binding [GO:0003723];nucleic acid binding [GO:0003676];nucleotide binding [GO:0000166];nucleic acid binding [GO:0003676];nucleotide binding [GO:0000166];nucleic acid binding [GO:0003676];nucleotide binding [GO:0000166];nucleic acid binding [GO:0003676];nucleotide binding [GO:0000166]	cytoplasm [GO:0005737];intracellular ribonucleoprotein complex [GO:0030529];nucleoplasm [GO:0005654];nucleus [GO:0005634];RNA polymerase II transcription factor complex [GO:0090575];nucleoplasm [GO:0005654];nucleoplasm [GO:0005654];nucleoplasm [GO:0005654]	GO:0003723;GO:0090575;GO:0005737;GO:0001837;GO:0030529;GO:0003729;GO:0000122;GO:0005654;GO:0000166;GO:0005634;GO:0044822;GO:0045893;GO:0003676;GO:0005654;GO:0000166;GO:0003676;GO:0005654;GO:0000166;GO:0003676;GO:0005654;GO:0000166;GO:0003676;GO:0000166
22.1212	22.5166	21.6985	23.3544	21.8562	22.2849	21.4008	21.7486	22.5459	25.7398	26.7037	26.295	22.5435	21.9676	21.412	22.0627	22.1302	22.1969	23.2998	22.1965	73330000	14	3	28.2		NaN	NaN	+	3.21292	3.47699		NaN	NaN	A0A0J9YYE9;A0A0G2JN66;A0A087WZV8;A0A0G2JPF7;P01850;A0A0G2JMB4;A0A075B6S1;A0A0G2JM62;A0A0G2JMA8;A0A0G2JP24;A0A0G2JMG7;A0A0G2JNG9;A0A5B9	A0A0J9YYE9;A0A0G2JN66;A0A087WZV8;A0A0G2JPF7;P01850;A0A0G2JMB4;A0A075B6S1;A0A0G2JM62;A0A0G2JMA8;A0A0G2JP24;A0A0G2JMG7;A0A0G2JNG9;A0A5B9	T-cell receptor beta-1 chain C region;T-cell receptor beta-2 chain C region	TRBV28;TRBC1;TRBC2	19.769	immune response [GO:0006955];regulation of immune response [GO:0050776];T cell costimulation [GO:0031295];T cell receptor signaling pathway [GO:0050852]		integral component of membrane [GO:0016021];membrane [GO:0016020];plasma membrane [GO:0005886];integral component of membrane [GO:0016021];integral component of membrane [GO:0016021];integral component of membrane [GO:0016021];integral component of membrane [GO:0016021];integral component of membrane [GO:0016021];integral component of membrane [GO:0016021];integral component of membrane [GO:00160…	GO:0031295;GO:0050852;GO:0006955;GO:0016021;GO:0016020;GO:0005886;GO:0050776;GO:0016021;GO:0016021;GO:0016021;GO:0016021;GO:0016021;GO:0016021;GO:0016021;GO:0016021;GO:0016021;GO:0016021;GO:0016021;GO:0016021
21.2198	22.9477	21.9818	23.7452	24.1017	24.1061	24.1406	23.8691	23.9655	24.6127	24.4149	24.6278	23.6891	24.0489	24.17	23.7384	24.6171	24.1663	24.9412	24.443	289770000	47	8	11.8		1.69463	1.00687		2.22594	0.560066		1.70189	0.6303	A0A087X054;Q9Y4L1;E9PJ21;A0A087WWI4;K7EQK2;A0A087X214;A0A087WW13;Q9BST8;J3QQH7;J3QLE9;J3QL06;J3KTF1	A0A087X054;Q9Y4L1;E9PJ21;A0A087WWI4;K7EQK2	Hypoxia up-regulated protein 1	HYOU1	104.78	cellular protein metabolic process [GO:0044267];cellular response to hypoxia [GO:0071456];endoplasmic reticulum unfolded protein response [GO:0030968];IRE1-mediated unfolded protein response [GO:0036498];negative regulation of endoplasmic reticulum stress-induced neuron intrinsic apoptotic signaling pathway [GO:1903382];negative regulation of hypoxia-induced intrinsic apoptotic signaling pathway …	ATP binding [GO:0005524];chaperone binding [GO:0051087];ATP binding [GO:0005524];ATP binding [GO:0005524];ATP binding [GO:0005524];ATP binding [GO:0005524];ATP binding [GO:0005524];ATP binding [GO:0005524]	endocytic vesicle lumen [GO:0071682];endoplasmic reticulum [GO:0005783];endoplasmic reticulum chaperone complex [GO:0034663];endoplasmic reticulum lumen [GO:0005788];extracellular exosome [GO:0070062];extracellular region [GO:0005576];focal adhesion [GO:0005925];membrane [GO:0016020];smooth endoplasmic reticulum [GO:0005790]	GO:0005524;GO:0036498;GO:0044267;GO:0071456;GO:0051087;GO:0071682;GO:0005783;GO:0034663;GO:0005788;GO:0030968;GO:0070062;GO:0005576;GO:0005925;GO:0016020;GO:1903382;GO:1903298;GO:0006898;GO:0034976;GO:0002931;GO:0005790;GO:0005524;GO:0005524;GO:0005524;GO:0005524;GO:0005524;GO:0005524
25.0837	24.9324	24.9742	25.3591	25.2715	25.188	22.2882	22.6685	22.4294	21.1781	22.1982	23.1947	21.9309	21.6111	22.8522	23.042	21.7039	20.7871	21.7344	22.0449	64550000	20	5	15		1.83786	0.2761		NaN	NaN		NaN	NaN	A0A087X0W7;Q86TX2;G3V4F2;A0A087WT95;P49753	A0A087X0W7;Q86TX2;G3V4F2;A0A087WT95;P49753	Acyl-coenzyme A thioesterase 1;Acyl-coenzyme A thioesterase 2, mitochondrial	ACOT2;ACOT1	46.292	acyl-CoA metabolic process [GO:0006637];cellular lipid metabolic process [GO:0044255];long-chain fatty acid metabolic process [GO:0001676];long-chain fatty-acyl-CoA biosynthetic process [GO:0035338];small molecule metabolic process [GO:0044281];triglyceride biosynthetic process [GO:0019432];very long-chain fatty acid metabolic process [GO:0000038];acyl-CoA metabolic process [GO:0006637];cellular …	acyl-CoA hydrolase activity [GO:0047617];carboxylic ester hydrolase activity [GO:0052689];palmitoyl-CoA hydrolase activity [GO:0016290];receptor binding [GO:0005102];acyl-CoA hydrolase activity [GO:0047617];carboxylic ester hydrolase activity [GO:0052689];palmitoyl-CoA hydrolase activity [GO:0016290];thiolester hydrolase activity [GO:0016790];thiolester hydrolase activity [GO:0016790]	extracellular exosome [GO:0070062];mitochondrial matrix [GO:0005759];mitochondrion [GO:0005739];cytosol [GO:0005829]	GO:0047617;GO:0006637;GO:0052689;GO:0044255;GO:0070062;GO:0001676;GO:0035338;GO:0005759;GO:0005739;GO:0016290;GO:0005102;GO:0044281;GO:0019432;GO:0000038;GO:0047617;GO:0006637;GO:0052689;GO:0044255;GO:0005829;GO:0001676;GO:0035338;GO:0016290;GO:0044281;GO:0019432;GO:0000038;GO:0006637;GO:0016790;GO:0006637;GO:0016790
22.3651	22.7645	22.3561	22.2773	22.0465	22.4186	21.481	22.7643	23.1823	22.3075	22.3295	22.5387	23.4541	24.053	23.8778	24.1131	23.7074	24.1375	23.925	22.0587	154660000	17	3	11.7		NaN	NaN		NaN	NaN		0.374945	-0.477672	Q2TAM5;E9PKH5;A0A087X0W8;Q04206;E9PI38;E9PQS6;E9PKV4;A0A087WVP0	Q2TAM5;E9PKH5;A0A087X0W8;Q04206	Transcription factor p65	RELA	42.868	acetaldehyde metabolic process [GO:0006117];aging [GO:0007568];cellular defense response [GO:0006968];cellular response to hydrogen peroxide [GO:0070301];cellular response to interleukin-1 [GO:0071347];cellular response to interleukin-6 [GO:0071354];cellular response to lipopolysaccharide [GO:0071222];cellular response to nicotine [GO:0071316];cellular response to peptide hormone stimulus [GO:007…	actinin binding [GO:0042805];activating transcription factor binding [GO:0033613];chromatin binding [GO:0003682];chromatin DNA binding [GO:0031490];DNA binding [GO:0003677];histone deacetylase binding [GO:0042826];identical protein binding [GO:0042802];NF-kappaB binding [GO:0051059];phosphate ion binding [GO:0042301];protein heterodimerization activity [GO:0046982];protein homodimerization activi…	cytoplasm [GO:0005737];cytosol [GO:0005829];I-kappaB/NF-kappaB complex [GO:0033256];NF-kappaB complex [GO:0071159];nucleoplasm [GO:0005654];nucleus [GO:0005634];transcription factor complex [GO:0005667];cytoplasm [GO:0005737];NF-kappaB complex [GO:0071159];nucleus [GO:0005634];cytoplasm [GO:0005737];NF-kappaB complex [GO:0071159];nucleus [GO:0005634];cytoplasm [GO:0005737];NF-kappaB complex [GO:0…	GO:0003677;GO:0038095;GO:0007249;GO:0033256;GO:0002755;GO:0002756;GO:0051059;GO:0071159;GO:0038061;GO:0000978;GO:0000980;GO:0000977;GO:0050852;GO:0035666;GO:0006117;GO:0042805;GO:0033613;GO:0007568;GO:0006968;GO:0070301;GO:0071347;GO:0071354;GO:0071222;GO:0071316;GO:0071375;GO:0071356;GO:0031490;GO:0003682;GO:0019221;GO:0005737;GO:0005829;GO:0051607;GO:0001942;GO:0042826;GO:0042802;GO:0006954;GO:…
27.2937	27.1464	27.4692	27.7439	27.4757	27.5443	27.8995	27.7284	28.1075	27.9233	28.219	28.1251	27.4258	27.4892	27.5113	27.6909	28.0079	27.8314	27.743	27.9275	2813800000	182	22	40.3		1.08715	0.284867		0.561834	0.177333		2.29546	0.34815	A0A087X0X3;P52272;M0QZM1;M0R019;M0R2T0;M0R2I7;M0R0N3;M0QY96;M0QYQ7;M0R0Y6;M0QYL3	A0A087X0X3;P52272	Heterogeneous nuclear ribonucleoprotein M	HNRNPM	77.569	alternative mRNA splicing, via spliceosome [GO:0000380];cellular response to carcinoembryonic antigen [GO:1990831];cellular response to lipopolysaccharide [GO:0071222];gene expression [GO:0010467];mRNA splicing, via spliceosome [GO:0000398];positive regulation of protein import [GO:1904591];positive regulation of protein localization to nucleus [GO:1900182];RNA splicing [GO:0008380];mRNA splicing…	nucleotide binding [GO:0000166];poly(A) RNA binding [GO:0044822];protein domain specific binding [GO:0019904];RNA binding [GO:0003723];nucleotide binding [GO:0000166];RNA binding [GO:0003723];nucleotide binding [GO:0000166];RNA binding [GO:0003723];nucleotide binding [GO:0000166];RNA binding [GO:0003723];nucleotide binding [GO:0000166];RNA binding [GO:0003723];RNA binding [GO:0003723];nucleotide …	catalytic step 2 spliceosome [GO:0071013];cell surface [GO:0009986];extracellular exosome [GO:0070062];extracellular matrix [GO:0031012];integral component of plasma membrane [GO:0005887];membrane [GO:0016020];nuclear matrix [GO:0016363];nucleolus [GO:0005730];nucleoplasm [GO:0005654];paraspeckles [GO:0042382];spliceosomal complex [GO:0005681]	GO:0003723;GO:0008380;GO:0000380;GO:0071013;GO:0009986;GO:1990831;GO:0071222;GO:0070062;GO:0031012;GO:0010467;GO:0005887;GO:0000398;GO:0016020;GO:0016363;GO:0005730;GO:0005654;GO:0000166;GO:0042382;GO:0044822;GO:1904591;GO:1900182;GO:0019904;GO:0005681;GO:0003723;GO:0000398;GO:0000166;GO:0003723;GO:0000398;GO:0000166;GO:0003723;GO:0000398;GO:0000166;GO:0003723;GO:0000398;GO:0000166;GO:0003723;GO:…
25.6807	26.1769	26.0063	25.5984	25.612	26.013	25.7228	25.7446	25.6696	25.9583	25.7848	25.6112	24.8793	26.7824	25.4605	25.4472	25.9503	26.1949	25.9864	26.0514	790780000	72	16	17.3		0.463234	-0.2135		0.284564	0.0724335		0.443807	0.4034	A0A0G2JN29;A0A087X117;Q15155;A0A0G2JP90;A0A087WW46;H3BUC9	A0A0G2JN29;A0A087X117;Q15155;A0A0G2JP90;A0A087WW46	Nodal modulator 1	NOMO1	139.54		carbohydrate binding [GO:0030246];carbohydrate binding [GO:0030246];carbohydrate binding [GO:0030246];carbohydrate binding [GO:0030246];carbohydrate binding [GO:0030246]	integral component of membrane [GO:0016021];membrane [GO:0016020]	GO:0030246;GO:0016021;GO:0016020;GO:0030246;GO:0030246;GO:0030246;GO:0030246
23.4887	23.5469	23.7532	23.7439	23.5686	23.5343	23.6993	22.3351	22.5683	22.0122	21.6285	21.549	22.7984	21.8815	22.6734	22.3114	22.7218	22.0471	21.9786	21.7666	34184000	19	4	10.8		0.0652328	0.0193329		NaN	NaN		NaN	NaN	A0A087X1A5;Q5JW30;O95793;Q5JW28;F6UDC6	A0A087X1A5;Q5JW30;O95793;Q5JW28	Double-stranded RNA-binding protein Staufen homolog 1	STAU1	54.945	cellular response to oxidative stress [GO:0034599];intracellular mRNA localization [GO:0008298];positive regulation by virus of viral protein levels in host cell [GO:0046726];positive regulation of long-term synaptic potentiation [GO:1900273];positive regulation of viral genome replication [GO:0045070]	double-stranded RNA binding [GO:0003725];poly(A) RNA binding [GO:0044822]	cell body [GO:0044297];cytoplasm [GO:0005737];cytoplasmic ribonucleoprotein granule [GO:0036464];cytoplasmic stress granule [GO:0010494];dendrite [GO:0030425];endoplasmic reticulum [GO:0005783];extracellular exosome [GO:0070062];membrane [GO:0016020];microtubule associated complex [GO:0005875];neuronal cell body [GO:0043025];plasma membrane [GO:0005886];rough endoplasmic reticulum [GO:0005791];cy…	GO:0044297;GO:0034599;GO:0005737;GO:0036464;GO:0010494;GO:0030425;GO:0003725;GO:0005783;GO:0070062;GO:0008298;GO:0016020;GO:0005875;GO:0043025;GO:0005886;GO:0044822;GO:0046726;GO:1900273;GO:0045070;GO:0005791;GO:0005737
22.2334	23.1102	21.5937	23.9944	23.1303	22.685	22.5136	23.2757	22.2308	21.3175	22.302	22.057	24.6456	24.0286	24.379	25.2607	24.424	24.1662	25.2397	24.8879	319590000	27	6	16.2		NaN	NaN		NaN	NaN		0.105321	0.100975	A0A087X1B2;B9A018;Q53GS9;A0A087WW31	A0A087X1B2;B9A018;Q53GS9	U4/U6.U5 tri-snRNP-associated protein 2	USP39	56.399	cell cycle [GO:0007049];cell division [GO:0051301];gene expression [GO:0010467];mRNA processing [GO:0006397];mRNA splicing, via spliceosome [GO:0000398];protein deubiquitination [GO:0016579];RNA splicing [GO:0008380];spliceosomal complex assembly [GO:0000245];protein deubiquitination [GO:0016579];protein deubiquitination [GO:0016579]	ubiquitinyl hydrolase activity [GO:0036459];zinc ion binding [GO:0008270];ubiquitinyl hydrolase activity [GO:0036459];zinc ion binding [GO:0008270];ubiquitinyl hydrolase activity [GO:0036459];zinc ion binding [GO:0008270]	nucleoplasm [GO:0005654];spliceosomal complex [GO:0005681]	GO:0008380;GO:0007049;GO:0051301;GO:0010467;GO:0006397;GO:0000398;GO:0005654;GO:0016579;GO:0005681;GO:0000245;GO:0036459;GO:0008270;GO:0016579;GO:0036459;GO:0008270;GO:0016579;GO:0036459;GO:0008270
23.8903	24.5805	24.2408	23.9423	24.7164	23.8661	23.7116	23.4531	22.8889	21.9989	21.4721	21.3542	23.5732	22.2454	22.1185	23.7801	22.954	21.7701	21.8116	23.2265	400520000	47	9	12.3		0.064317	-0.0622667		0.31352	0.227483		NaN	NaN	A0A087X1N2;Q03701	A0A087X1N2;Q03701	CCAAT/enhancer-binding protein zeta	CEBPZ	114.16	positive regulation of transcription from RNA polymerase II promoter [GO:0045944];transcription from RNA polymerase II promoter [GO:0006366]	DNA binding [GO:0003677];poly(A) RNA binding [GO:0044822];RNA polymerase II core promoter proximal region sequence-specific DNA binding [GO:0000978];transcriptional activator activity, RNA polymerase II core promoter proximal region sequence-specific binding [GO:0001077]	nucleus [GO:0005634]	GO:0003677;GO:0000978;GO:0005634;GO:0044822;GO:0045944;GO:0006366;GO:0001077
23.4491	23.4795	23.8637	23.4851	23.5423	23.9267	22.818	22.0615	22.9166	22.0738	22.3127	22.3808	21.2661	22.843	23.2027	21.9131	21.603	23.2083	23.2504	22.5775	22362000	8	2	10.1		0.10064	0.0539328		NaN	NaN		NaN	NaN	H0YM70;A0A087X1Z3;Q9UL46;H0YKU2	H0YM70;A0A087X1Z3;Q9UL46;H0YKU2	Proteasome activator complex subunit 2	PSME2	26.011	activation of MAPKK activity [GO:0000186];anaphase-promoting complex-dependent proteasomal ubiquitin-dependent protein catabolic process [GO:0031145];antigen processing and presentation of exogenous peptide antigen via MHC class I [GO:0042590];antigen processing and presentation of exogenous peptide antigen via MHC class I, TAP-dependent [GO:0002479];antigen processing and presentation of peptide…	endopeptidase activator activity [GO:0061133]	cytoplasm [GO:0005737];cytosol [GO:0005829];extracellular exosome [GO:0070062];membrane [GO:0016020];nucleoplasm [GO:0005654];proteasome activator complex [GO:0008537];proteasome complex [GO:0000502];proteasome activator complex [GO:0008537];proteasome activator complex [GO:0008537];proteasome activator complex [GO:0008537]	GO:0006977;GO:0038095;GO:0000082;GO:0000165;GO:0038061;GO:0007265;GO:0050852;GO:0000186;GO:0031145;GO:0042590;GO:0002479;GO:0002474;GO:0006915;GO:0007411;GO:0034641;GO:0005737;GO:0005829;GO:0061133;GO:0007173;GO:0070062;GO:0008543;GO:0010467;GO:0045087;GO:0008286;GO:0016020;GO:0000278;GO:0043066;GO:0090090;GO:0051436;GO:0048011;GO:0005654;GO:0006595;GO:0090263;GO:0010950;GO:0051437;GO:0012501;GO:…
23.339	21.4171	22.457	22.1382	22.8383	23.2174	22.5587	21.9837	23.3701	21.5357	21.8511	23.9304	23.6607	21.7505	22.4396	22.1111	23.3716	23.0166	23.1824	23.1533	82664000	5	3	4.5		NaN	NaN		NaN	NaN		2.74235	1.17218	A0A087X211;Q8TCG1	A0A087X211;Q8TCG1	Protein CIP2A	KIAA1524	102.28	positive regulation of neural precursor cell proliferation [GO:2000179];spermatogenesis [GO:0007283]		cytoplasm [GO:0005737];integral component of membrane [GO:0016021];plasma membrane [GO:0005886]	GO:0005737;GO:0016021;GO:0005886;GO:2000179;GO:0007283
23.6369	22.6723	23.6373	22.3939	22.8318	23.1167	23.3899	24.0387	23.301	23.451	23.3699	23.827	22.5567	23.6078	23.6287	23.3916	23.5655	24.0182	23.6698	22.4833	151470000	23	5	8.4		NaN	NaN		0.0338519	-0.0272338		NaN	NaN	A0A087X295;Q9NNW5;E9PDU5;E9PBK6;E5RFX3;F8WE36;C9K020;Q6PKC6	A0A087X295;Q9NNW5;E9PDU5;E9PBK6	WD repeat-containing protein 6	WDR6	125	cell cycle arrest [GO:0007050];negative regulation of autophagy [GO:0010507];negative regulation of cell proliferation [GO:0008285]	poly(A) RNA binding [GO:0044822]	cytoplasm [GO:0005737];protein complex [GO:0043234]	GO:0007050;GO:0005737;GO:0010507;GO:0008285;GO:0044822;GO:0043234
23.189	23.1094	23.3843	22.0977	22.014	22.1892	23.2667	22.5625	22.3831	23.3454	21.8176	22.7769	22.0367	22.3933	22.3777	23.4016	24.1683	24.8625	25.0416	24.6533	209730000	19	4	20.6		NaN	NaN		NaN	NaN	+	4.74449	3.07135	A0A087X2D5;Q9BRJ2;A0A0G2JMS5;A0A087WU62	A0A087X2D5;Q9BRJ2;A0A0G2JMS5;A0A087WU62	39S ribosomal protein L45, mitochondrial	MRPL45	35.29	mitochondrial translation [GO:0032543];mitochondrial translational elongation [GO:0070125];mitochondrial translational initiation [GO:0070124];mitochondrial translational termination [GO:0070126];organelle organization [GO:0006996]	poly(A) RNA binding [GO:0044822]	mitochondrial inner membrane [GO:0005743];ribosome [GO:0005840]	GO:0005743;GO:0032543;GO:0070125;GO:0070124;GO:0070126;GO:0006996;GO:0044822;GO:0005840
24.7896	25.0924	24.9471	24.6191	24.5504	24.7954	22.7052	22.5911	21.9847	22.4624	23.246	22.5611	23.2386	22.1395	24.9433	23.5856	22.4464	20.9147	22.2078	22.3079	125270000	40	13	18.1		1.18914	-0.288066		NaN	NaN		NaN	NaN	A0A087X2D8;O60271;D6RHI8;H0YBE9;H0YBS5;E9PFH7;A0A087WYG2;Q9UPT6	A0A087X2D8;O60271	C-Jun-amino-terminal kinase-interacting protein 4	SPAG9	145.17	activation of JUN kinase activity [GO:0007257];muscle cell differentiation [GO:0042692];negative regulation of protein homodimerization activity [GO:0090074];positive regulation of cell migration [GO:0030335];positive regulation of muscle cell differentiation [GO:0051149];positive regulation of neuron differentiation [GO:0045666];protein homooligomerization [GO:0051260];retrograde transport, endo…	JUN kinase binding [GO:0008432];kinesin binding [GO:0019894];MAP-kinase scaffold activity [GO:0005078];receptor signaling complex scaffold activity [GO:0030159];JUN kinase binding [GO:0008432];kinesin binding [GO:0019894];MAP-kinase scaffold activity [GO:0005078];receptor signaling complex scaffold activity [GO:0030159]	acrosomal vesicle [GO:0001669];cytoplasm [GO:0005737];cytosol [GO:0005829];extracellular exosome [GO:0070062];integral component of membrane [GO:0016021];microtubule organizing center [GO:0005815];perinuclear region of cytoplasm [GO:0048471];axolemma [GO:0030673];cytoplasm [GO:0005737];dendrite [GO:0030425];Golgi membrane [GO:0000139];smooth endoplasmic reticulum [GO:0005790];integral component o…	GO:0008432;GO:0005078;GO:0001669;GO:0007257;GO:0005737;GO:0005829;GO:0070062;GO:0016021;GO:0019894;GO:0005815;GO:0042692;GO:0090074;GO:0048471;GO:0030335;GO:0051149;GO:0045666;GO:0051260;GO:0030159;GO:0042147;GO:0007283;GO:0051146;GO:0000139;GO:0008432;GO:0005078;GO:0007257;GO:0030673;GO:0007411;GO:0005737;GO:0030425;GO:0030900;GO:0001701;GO:0019894;GO:0048286;GO:0060425;GO:0009791;GO:0008104;GO:…
23.7404	22.8235	22.506	22.3403	22.8388	22.4424	22.3042	22.4572	22.7832	22.5731	22.1631	20.5656	22.537	22.9058	23.1154	22.6981	22.9349	22.8045	23.624	22.3831	121300000	39	12	6.8		NaN	NaN		NaN	NaN		0.165023	0.12255	A0A087X2H1;Q9ULT8;G3V4V5;H0YJP0;H0YJD4;A0A087WVU6	A0A087X2H1;Q9ULT8;G3V4V5;H0YJP0	E3 ubiquitin-protein ligase HECTD1	HECTD1	289.63	aorta development [GO:0035904];heart valve development [GO:0003170];natural killer cell differentiation [GO:0001779];negative regulation of protein localization to plasma membrane [GO:1903077];neural tube closure [GO:0001843];protein autoubiquitination [GO:0051865];protein K63-linked ubiquitination [GO:0070534];protein ubiquitination involved in ubiquitin-dependent protein catabolic process [GO:0…	ligase activity [GO:0016874];metal ion binding [GO:0046872];ubiquitin protein ligase activity [GO:0061630];ubiquitin-protein transferase activity [GO:0004842];metal ion binding [GO:0046872];ubiquitin-protein transferase activity [GO:0004842];ligase activity [GO:0016874];metal ion binding [GO:0046872];ubiquitin-protein transferase activity [GO:0004842];ligase activity [GO:0016874];ubiquitin-protei…		GO:0035904;GO:0003170;GO:0016874;GO:0046872;GO:0001779;GO:1903077;GO:0001843;GO:0070534;GO:0051865;GO:0042787;GO:0060708;GO:0060707;GO:0061630;GO:0004842;GO:0003281;GO:0046872;GO:0004842;GO:0016874;GO:0046872;GO:0004842;GO:0016874;GO:0004842
26.8235	26.7924	26.4968	26.8121	26.9728	26.9598	25.7927	25.9627	25.481	25.554	25.8845	25.6458	25.2097	25.9061	26.4274	26.4517	25.9962	27.3041	26.2259	25.4274	1471900000	76	10	30		0.841779	0.210667		0.106305	-0.0506999		0.192729	0.239676	A0A087X2I1;P62333;H0YJC0;H0YJS8;H0YJX2;H0YJE9;H0YJT1	A0A087X2I1;P62333	26S protease regulatory subunit 10B	PSMC6	45.796	activation of MAPKK activity [GO:0000186];anaphase-promoting complex-dependent proteasomal ubiquitin-dependent protein catabolic process [GO:0031145];antigen processing and presentation of exogenous peptide antigen via MHC class I [GO:0042590];antigen processing and presentation of exogenous peptide antigen via MHC class I, TAP-dependent [GO:0002479];antigen processing and presentation of peptide…	ATPase activity [GO:0016887];ATP binding [GO:0005524];proteasome-activating ATPase activity [GO:0036402];protein binding, bridging [GO:0030674];TBP-class protein binding [GO:0017025];ATP binding [GO:0005524];hydrolase activity [GO:0016787];ATP binding [GO:0005524];ATP binding [GO:0005524];ATP binding [GO:0005524]	cytosol [GO:0005829];cytosolic proteasome complex [GO:0031597];extracellular exosome [GO:0070062];membrane [GO:0016020];nuclear proteasome complex [GO:0031595];nucleoplasm [GO:0005654];nucleus [GO:0005634];proteasome accessory complex [GO:0022624];proteasome complex [GO:0000502];proteasome regulatory particle, base subcomplex [GO:0008540];cytosolic proteasome complex [GO:0031597];inclusion body […	GO:0005524;GO:0016887;GO:0006977;GO:0030433;GO:0038095;GO:0000082;GO:0000165;GO:0038061;GO:0007265;GO:0050852;GO:0017025;GO:0000186;GO:0031145;GO:0042590;GO:0002479;GO:0002474;GO:0006915;GO:0007411;GO:0034641;GO:0005829;GO:0031597;GO:0007173;GO:0070062;GO:0008543;GO:0010467;GO:0045087;GO:0008286;GO:0016020;GO:0000278;GO:0043066;GO:0090090;GO:0051436;GO:0048011;GO:0031595;GO:0005654;GO:0005634;GO:…
22.2251	21.3807	22.074	22.623	22.4517	21.9527	22.2451	21.2448	21.7505	22.6593	22.1434	21.6581	22.8013	22.0208	22.0897	23.2538	23.0042	22.3578	21.4022	22.1866	54068000	13	5	3.2		NaN	NaN		NaN	NaN		0.186065	-0.206356	A0A088AWN3;A0A0A0MSY4;A0A0A0MRA7;Q9BZ29;A0A0A0MT38;Q5JUD8;H0Y3S1;Q5JUD3;X6RGR3;H7BZ79;A0A0D9SFH5	A0A088AWN3;A0A0A0MSY4;A0A0A0MRA7;Q9BZ29;A0A0A0MT38	Dedicator of cytokinesis protein 9	DOCK9	237.75	blood coagulation [GO:0007596];small GTPase mediated signal transduction [GO:0007264];small GTPase mediated signal transduction [GO:0007264];small GTPase mediated signal transduction [GO:0007264];small GTPase mediated signal transduction [GO:0007264];small GTPase mediated signal transduction [GO:0007264];small GTPase mediated signal transduction [GO:0007264];small GTPase mediated signal transduct…	Rho guanyl-nucleotide exchange factor activity [GO:0005089];guanyl-nucleotide exchange factor activity [GO:0005085];guanyl-nucleotide exchange factor activity [GO:0005085];guanyl-nucleotide exchange factor activity [GO:0005085];guanyl-nucleotide exchange factor activity [GO:0005085];guanyl-nucleotide exchange factor activity [GO:0005085];guanyl-nucleotide exchange factor activity [GO:0005085];gua…	cytosol [GO:0005829];endomembrane system [GO:0012505];membrane [GO:0016020];intracellular [GO:0005622];intracellular [GO:0005622];intracellular [GO:0005622];intracellular [GO:0005622];intracellular [GO:0005622];intracellular [GO:0005622];intracellular [GO:0005622];intracellular [GO:0005622];intracellular [GO:0005622];intracellular [GO:0005622]	GO:0005089;GO:0007596;GO:0005829;GO:0012505;GO:0016020;GO:0007264;GO:0005085;GO:0005622;GO:0007264;GO:0005085;GO:0005622;GO:0007264;GO:0005085;GO:0005622;GO:0007264;GO:0005085;GO:0005622;GO:0007264;GO:0005085;GO:0005622;GO:0007264;GO:0005085;GO:0005622;GO:0007264;GO:0005085;GO:0005622;GO:0007264;GO:0005085;GO:0005622;GO:0007264;GO:0005085;GO:0005622;GO:0007264;GO:0005085;GO:0005622;GO:0007264
21.9066	23.4004	23.2137	24.0278	23.2666	23.0754	24.2075	22.239	24.2975	24.4497	23.9892	24.4488	23.1993	21.9717	22.8176	21.5423	22.7405	23.1046	22.6976	22.4252	226320000	29	4	31.5		0.199146	-0.26238		0.445862	0.520418		NaN	NaN	A0A096LPI6;A0A096LNH5;A0A0B4J2H4;H7C1F6;A0A0B4J2D5;P30042;H7C2G3;A0A096LNJ1;A0A096LP73;F2Z2Q0;A0A096LP12	A0A096LPI6;A0A096LNH5;A0A0B4J2H4;H7C1F6;A0A0B4J2D5;P30042;H7C2G3	ES1 protein homolog, mitochondrial	C21orf33	30.376			mitochondrion [GO:0005739]	GO:0005739
23.1234	22.7701	23.494	22.6097	22.5801	22.8657	21.4834	22.0525	21.4503	22.2522	22.2596	22.0077	22.9252	21.9527	23.0701	22.5095	25.7815	25.6239	25.8449	25.2957	321880000	8	2	7.1		NaN	NaN		NaN	NaN	+	5.34114	3.06984	A0A0A0MQS8;Q02094;A0A087WZZ4	A0A0A0MQS8;Q02094;A0A087WZZ4	Ammonium transporter Rh type A	RHAG	44.297	ammonium transport [GO:0015696];bicarbonate transport [GO:0015701];carbon dioxide transport [GO:0015670];cellular ion homeostasis [GO:0006873];cellular response to nitrogen starvation [GO:0006995];erythrocyte development [GO:0048821];multicellular organismal iron ion homeostasis [GO:0060586];nitrogen utilization [GO:0019740];organic cation transport [GO:0015695];small molecule metabolic process […	ammonium transmembrane transporter activity [GO:0008519];ankyrin binding [GO:0030506];ammonium transmembrane transporter activity [GO:0008519];ammonium transmembrane transporter activity [GO:0008519]	integral component of plasma membrane [GO:0005887];plasma membrane [GO:0005886];integral component of membrane [GO:0016021];integral component of membrane [GO:0016021]	GO:0008519;GO:0015696;GO:0030506;GO:0015701;GO:0015670;GO:0006873;GO:0006995;GO:0048821;GO:0005887;GO:0060586;GO:0019740;GO:0015695;GO:0005886;GO:0044281;GO:0055085;GO:0008519;GO:0016021;GO:0008519;GO:0016021
22.224	22.4173	23.0979	22.0145	23.1142	22.4257	22.0545	21.5452	21.2233	22.9057	22.3089	23.0679	23.6602	24.6514	23.6536	23.8674	23.7377	23.826	23.8648	24.0833	157280000	22	5	9.6		NaN	NaN		NaN	NaN		0.120959	-0.0802002	A8MY87;A0A0A0MQW1;Q8IVT5	A8MY87;A0A0A0MQW1;Q8IVT5	Kinase suppressor of Ras 1	KSR1	69.061	activation of MAPKK activity [GO:0000186];axon guidance [GO:0007411];epidermal growth factor receptor signaling pathway [GO:0007173];Fc-epsilon receptor signaling pathway [GO:0038095];fibroblast growth factor receptor signaling pathway [GO:0008543];innate immune response [GO:0045087];insulin receptor signaling pathway [GO:0008286];MAPK cascade [GO:0000165];neurotrophin TRK receptor signaling path…	ATP binding [GO:0005524];metal ion binding [GO:0046872];protein C-terminus binding [GO:0008022];protein kinase activity [GO:0004672];ATP binding [GO:0005524];protein kinase activity [GO:0004672];ATP binding [GO:0005524];metal ion binding [GO:0046872];protein kinase C activity [GO:0004697]	cytosol [GO:0005829];endoplasmic reticulum [GO:0005783];endoplasmic reticulum membrane [GO:0005789];membrane [GO:0016020];protein complex [GO:0043234];intracellular [GO:0005622];intracellular [GO:0005622]	GO:0005524;GO:0038095;GO:0000165;GO:0007265;GO:0000186;GO:0007411;GO:0005829;GO:0005783;GO:0005789;GO:0007173;GO:0008543;GO:0045087;GO:0008286;GO:0016020;GO:0046872;GO:0048011;GO:0008022;GO:0043234;GO:0004672;GO:0007264;GO:0048010;GO:0005524;GO:0005622;GO:0035556;GO:0004672;GO:0005524;GO:0005622;GO:0035556;GO:0046872;GO:0004697
27.0228	27.2413	26.9375	27.1925	27.1012	26.9677	27.0194	27.2033	27.1061	27.2051	26.854	27.018	26.8009	26.8803	26.9062	26.9663	26.5387	26.7598	26.3555	27.0029	1844300000	145	14	24.8		0.0620426	0.0199324		0.297302	-0.0839005		0.767971	-0.2242	A0A0A0MRA5;B7Z4B8;Q9BUJ2;M0R3F1;M0QYZ0;M0R203;M0QZV6;M0R0K8;M0QYI8;M0QYM5	A0A0A0MRA5;B7Z4B8;Q9BUJ2;M0R3F1;M0QYZ0	Heterogeneous nuclear ribonucleoprotein U-like protein 1	HNRNPUL1	85.939	gene expression [GO:0010467];mRNA splicing, via spliceosome [GO:0000398];regulation of transcription, DNA-templated [GO:0006355];response to virus [GO:0009615];RNA processing [GO:0006396];RNA splicing [GO:0008380];transcription, DNA-templated [GO:0006351];response to virus [GO:0009615];RNA processing [GO:0006396];response to virus [GO:0009615];RNA processing [GO:0006396];response to virus [GO:000…	enzyme binding [GO:0019899];poly(A) RNA binding [GO:0044822];RNA binding [GO:0003723]	intracellular ribonucleoprotein complex [GO:0030529];nucleoplasm [GO:0005654];nucleus [GO:0005634];intracellular ribonucleoprotein complex [GO:0030529];nucleoplasm [GO:0005654];viral nucleocapsid [GO:0019013];nucleoplasm [GO:0005654];nucleoplasm [GO:0005654];nucleoplasm [GO:0005654]	GO:0003723;GO:0006396;GO:0008380;GO:0019899;GO:0010467;GO:0030529;GO:0000398;GO:0005654;GO:0005634;GO:0044822;GO:0006355;GO:0009615;GO:0006351;GO:0006396;GO:0030529;GO:0005654;GO:0009615;GO:0019013;GO:0006396;GO:0009615;GO:0006396;GO:0009615;GO:0006396;GO:0005654;GO:0009615;GO:0006396;GO:0005654;GO:0009615;GO:0006396;GO:0009615;GO:0006396;GO:0009615;GO:0006396;GO:0005654;GO:0009615;GO:0006396;GO:…
23.0108	22.5687	23.4853	21.756	23.8163	21.2723	20.9908	21.427	21.9736	22.6885	20.504	21.8436	23.2404	23.4916	23.7907	23.3645	23.384	23.8985	23.4853	23.3355	118140000	13	5	1.7		NaN	NaN		NaN	NaN		0.376806	0.350625	A0A0A0MRF6;Q99996;H7BYL6;A0A0A0MRE9;A0A087WX84	A0A0A0MRF6;Q99996;H7BYL6;A0A0A0MRE9	A-kinase anchor protein 9	AKAP9	453.49	activation of MAPKK activity [GO:0000186];axon guidance [GO:0007411];cardiac conduction [GO:0061337];cellular response to cAMP [GO:0071320];epidermal growth factor receptor signaling pathway [GO:0007173];Fc-epsilon receptor signaling pathway [GO:0038095];fibroblast growth factor receptor signaling pathway [GO:0008543];G2/M transition of mitotic cell cycle [GO:0000086];innate immune response [GO:0…	ion channel binding [GO:0044325];potassium channel regulator activity [GO:0015459];protein complex scaffold [GO:0032947];protein kinase A regulatory subunit binding [GO:0034237];receptor binding [GO:0005102]	centrosome [GO:0005813];ciliary basal body [GO:0036064];cis-Golgi network [GO:0005801];cytoskeleton [GO:0005856];cytosol [GO:0005829];Golgi apparatus [GO:0005794];Golgi stack [GO:0005795];intracellular membrane-bounded organelle [GO:0043231];pericentriolar material [GO:0000242];voltage-gated potassium channel complex [GO:0008076]	GO:0038095;GO:0000086;GO:0005794;GO:0005795;GO:0000165;GO:0007265;GO:0060009;GO:0000186;GO:0007411;GO:0061337;GO:0071320;GO:0005813;GO:0036064;GO:0005801;GO:0005856;GO:0005829;GO:0007173;GO:0008543;GO:0045087;GO:0008286;GO:0043231;GO:0044325;GO:0007020;GO:0000278;GO:0048011;GO:0006996;GO:0000242;GO:0033138;GO:1901018;GO:0015459;GO:0032947;GO:0034237;GO:0005102;GO:0086091;GO:0060306;GO:0060307;GO:…
22.6699	23.0489	21.4227	23.3528	22.0918	22.0249	21.9941	22.3616	23.1715	22.5275	21.8442	23.0716	21.3212	22.0574	23.3155	22.8444	21.8428	22.016	22.0371	21.5411	22278000	9	2	2.5		NaN	NaN		NaN	NaN		0.520174	-0.31966	A0A0A0MRH6;Q5JRA6	A0A0A0MRH6;Q5JRA6	Melanoma inhibitory activity protein 3	MIA3	114	cellular protein metabolic process [GO:0044267];chondrocyte development [GO:0002063];collagen fibril organization [GO:0030199];ER to Golgi vesicle-mediated transport [GO:0006888];exocytosis [GO:0006887];membrane organization [GO:0061024];negative regulation of cell adhesion [GO:0007162];negative regulation of cell migration [GO:0030336];positive regulation of bone mineralization [GO:0030501];posi…		endoplasmic reticulum membrane [GO:0005789];integral component of membrane [GO:0016021];intracellular membrane-bounded organelle [GO:0043231];membrane [GO:0016020];endoplasmic reticulum membrane [GO:0005789];integral component of membrane [GO:0016021]	GO:0006888;GO:0044267;GO:0002063;GO:0030199;GO:0005789;GO:0006887;GO:0016021;GO:0043231;GO:0016020;GO:0061024;GO:0007162;GO:0030336;GO:0030501;GO:0002687;GO:0043687;GO:0018279;GO:0015031;GO:0042060;GO:0005789;GO:0016021;GO:0015031
22.2378	22.6675	22.9148	21.9901	22.2186	22.8611	22.4597	22.3143	22.1763	22.0786	22.7124	21.8517	21.9842	22.3068	22.1218	22.5127	22.1606	22.043	22.2465	23.5607	49855000	19	5	5.9		NaN	NaN		NaN	NaN		NaN	NaN	A0A0A0MRJ0;Q5VT25;H0Y5V1;H0Y7V8;A0A0A0MRJ1;H0Y6V3;A0A0U1RRC3;H0Y6R0;M0R333;Q09013	A0A0A0MRJ0;Q5VT25;H0Y5V1;H0Y7V8;A0A0A0MRJ1	Non-specific serine/threonine protein kinase;Serine/threonine-protein kinase MRCK alpha	CDC42BPA	193.63	cardiac conduction [GO:0061337];cellular calcium ion homeostasis [GO:0006874];muscle cell apoptotic process [GO:0010657];nuclear envelope organization [GO:0006998];peptidyl-serine phosphorylation [GO:0018105];protein phosphorylation [GO:0006468];regulation of cardiac conduction [GO:1903779];regulation of catalytic activity [GO:0050790];regulation of excitatory postsynaptic membrane potential invo…	ATP binding [GO:0005524];metal ion binding [GO:0046872];myosin phosphatase regulator activity [GO:0017020];protein serine/threonine kinase activity [GO:0004674];ATP binding [GO:0005524];identical protein binding [GO:0042802];magnesium ion binding [GO:0000287];protein serine/threonine kinase activity [GO:0004674];ATP binding [GO:0005524];protein serine/threonine kinase activity [GO:0004674];ATP bi…	cytosol [GO:0005829];endoplasmic reticulum membrane [GO:0005789];integral component of mitochondrial outer membrane [GO:0031307];nuclear membrane [GO:0031965];nuclear outer membrane [GO:0005640];plasma membrane [GO:0005886];sarcoplasmic reticulum membrane [GO:0033017];actomyosin [GO:0042641];cell-cell junction [GO:0005911];cell leading edge [GO:0031252];cytoplasm [GO:0005737];extracellular exosom…	GO:0005524;GO:0061337;GO:0006874;GO:0005829;GO:0005789;GO:0031307;GO:0046872;GO:0010657;GO:0017020;GO:0006998;GO:0031965;GO:0005640;GO:0018105;GO:0005886;GO:0006468;GO:0004674;GO:1903779;GO:0050790;GO:0014853;GO:0008016;GO:0010830;GO:0014722;GO:0002028;GO:0051823;GO:0033017;GO:0005524;GO:0031532;GO:0042641;GO:0031032;GO:0031252;GO:0016477;GO:0005911;GO:0005737;GO:0070062;GO:0042802;GO:0035556;GO:…
21.8915	23.9588	24.2761	24.3879	24.8825	24.3135	23.2713	22.2767	22.6929	22.3951	20.9474	21.9234	26.2195	25.2449	25.3248	25.9534	25.9279	21.8214	25.7413	24.8654	566380000	31	4	29.2		0.80486	0.865386		NaN	NaN		0.51974	-0.852544	F6S8N6;A0A0A0MRJ6;H7BY58;P22061;C9J0F2	F6S8N6;A0A0A0MRJ6;H7BY58;P22061	Protein-L-isoaspartate O-methyltransferase;Protein-L-isoaspartate(D-aspartate) O-methyltransferase	PCMT1	26.626	cellular protein metabolic process [GO:0044267];protein methylation [GO:0006479];protein repair [GO:0030091]	protein-L-isoaspartate (D-aspartate) O-methyltransferase activity [GO:0004719];protein-L-isoaspartate (D-aspartate) O-methyltransferase activity [GO:0004719];protein-L-isoaspartate (D-aspartate) O-methyltransferase activity [GO:0004719];protein-L-isoaspartate (D-aspartate) O-methyltransferase activity [GO:0004719];protein-L-isoaspartate (D-aspartate) O-methyltransferase activity [GO:0004719]	cytoplasm [GO:0005737];cytosol [GO:0005829];endoplasmic reticulum [GO:0005783];extracellular exosome [GO:0070062];extracellular vesicle [GO:1903561];cytoplasm [GO:0005737]	GO:0044267;GO:0005737;GO:0005829;GO:0005783;GO:0070062;GO:1903561;GO:0006479;GO:0030091;GO:0004719;GO:0004719;GO:0005737;GO:0004719;GO:0004719;GO:0004719
22.1028	22.1772	23.1681	22.2432	22.2989	21.3865	22.1707	22.38	21.9749	22.8884	22.7077	23.3259	26.0647	26.4441	26.1831	26.287	26.3692	26.511	26.2979	26.1161	818910000	61	16	16		NaN	NaN		NaN	NaN		0.28516	0.078825	A0A0A0MRM8;A0A0D9SGC1;E7EW20;Q9UM54;Q5JVM0	A0A0A0MRM8;A0A0D9SGC1;E7EW20;Q9UM54	Unconventional myosin-VI	MYO6	145.01	actin filament-based movement [GO:0030048];auditory receptor cell differentiation [GO:0042491];cellular response to electrical stimulus [GO:0071257];dendrite development [GO:0016358];DNA damage response, signal transduction by p53 class mediator [GO:0030330];endocytosis [GO:0006897];glutamate secretion [GO:0014047];inner ear morphogenesis [GO:0042472];intracellular protein transport [GO:0006886];…	actin binding [GO:0003779];actin filament binding [GO:0051015];ADP binding [GO:0043531];ATP binding [GO:0005524];calmodulin binding [GO:0005516];minus-end directed microfilament motor activity [GO:0060001];motor activity [GO:0003774];ATP binding [GO:0005524];motor activity [GO:0003774];ATP binding [GO:0005524];motor activity [GO:0003774];ATP binding [GO:0005524];motor activity [GO:0003774]	apical part of cell [GO:0045177];axon [GO:0030424];cell cortex [GO:0005938];clathrin-coated vesicle membrane [GO:0030665];coated pit [GO:0005905];cytoplasm [GO:0005737];cytoplasmic, membrane-bounded vesicle [GO:0016023];cytosol [GO:0005829];DNA-directed RNA polymerase II, holoenzyme [GO:0016591];endocytic vesicle [GO:0030139];extracellular exosome [GO:0070062];filamentous actin [GO:0031941];Golgi…	GO:0043531;GO:0005524;GO:0030330;GO:0016591;GO:0005794;GO:0003779;GO:0051015;GO:0030048;GO:0045177;GO:0042491;GO:0030424;GO:0005516;GO:0005938;GO:0071257;GO:0030665;GO:0005905;GO:0005737;GO:0016023;GO:0005829;GO:0016358;GO:0030139;GO:0006897;GO:0070062;GO:0031941;GO:0014047;GO:0042472;GO:0006886;GO:0007626;GO:0005765;GO:0016020;GO:0061024;GO:0005902;GO:0060001;GO:0003774;GO:0043025;GO:0031965;GO:…
21.4837	22.6529	22.4291	21.5395	21.8893	23.3571	22.2372	21.9879	22.3274	22.1181	21.7304	21.6306	22.6641	23.5211	22.3718	22.4086	23.4524	22.6337	22.8675	22.1695	71701000	13	5	29.4		NaN	NaN		NaN	NaN		0.223599	0.247168	A0A0A0MRN7;Q6YP21;A0A0A0MRN6	A0A0A0MRN7;Q6YP21;A0A0A0MRN6	Kynurenine--oxoglutarate transaminase 3	CCBL2	29.471	2-oxoglutarate metabolic process [GO:0006103];biosynthetic process [GO:0009058];cellular amino acid metabolic process [GO:0006520];cellular nitrogen compound metabolic process [GO:0034641];kynurenine metabolic process [GO:0070189];L-kynurenine metabolic process [GO:0097052];small molecule metabolic process [GO:0044281];tryptophan catabolic process [GO:0006569];biosynthetic process [GO:0009058];bi…	cysteine-S-conjugate beta-lyase activity [GO:0047804];kynurenine-glyoxylate transaminase activity [GO:0047315];kynurenine-oxoglutarate transaminase activity [GO:0016212];poly(A) RNA binding [GO:0044822];pyridoxal phosphate binding [GO:0030170];catalytic activity [GO:0003824];pyridoxal phosphate binding [GO:0030170];catalytic activity [GO:0003824];pyridoxal phosphate binding [GO:0030170]	mitochondrion [GO:0005739]	GO:0006103;GO:0097052;GO:0009058;GO:0006520;GO:0034641;GO:0047804;GO:0070189;GO:0047315;GO:0016212;GO:0005739;GO:0044822;GO:0030170;GO:0044281;GO:0006569;GO:0009058;GO:0003824;GO:0030170;GO:0009058;GO:0003824;GO:0030170
23.1634	23.7043	23.6512	23.298	23.5386	23.2818	22.9549	22.5174	20.9183	23.0339	22.1904	21.9018	22.8733	22.5525	22.4662	22.6754	22.9052	22.2612	22.3416	20.8893	41980000	14	2	6.9		0.281231	-0.1335		NaN	NaN		NaN	NaN	A0A0A0MRP6;B7ZLQ5;P28370	A0A0A0MRP6;B7ZLQ5;P28370	Probable global transcription activator SNF2L1	SMARCA1	122.86	ATP-dependent chromatin remodeling [GO:0043044];brain development [GO:0007420];chromatin remodeling [GO:0006338];DNA strand renaturation [GO:0000733];neuron differentiation [GO:0030182];positive regulation of transcription, DNA-templated [GO:0045893];transcription, DNA-templated [GO:0006351];ATP-dependent chromatin remodeling [GO:0043044];neuron differentiation [GO:0030182];regulation of neural p…	annealing helicase activity [GO:0036310];ATPase activity [GO:0016887];ATP binding [GO:0005524];DNA binding [GO:0003677];helicase activity [GO:0004386];ATPase activity [GO:0016887];ATP binding [GO:0005524];DNA binding [GO:0003677];ATPase activity [GO:0016887];ATP binding [GO:0005524];DNA binding [GO:0003677]	CERF complex [GO:0090537];nucleus [GO:0005634];NURF complex [GO:0016589];nuclear chromatin [GO:0000790];NURF complex [GO:0016589];NURF complex [GO:0016589]	GO:0005524;GO:0043044;GO:0016887;GO:0090537;GO:0003677;GO:0000733;GO:0016589;GO:0036310;GO:0007420;GO:0006338;GO:0004386;GO:0030182;GO:0005634;GO:0045893;GO:0006351;GO:0005524;GO:0043044;GO:0016887;GO:0003677;GO:0016589;GO:0030182;GO:0000790;GO:2000177;GO:0005524;GO:0043044;GO:0016887;GO:0003677;GO:0016589
21.3546	23.4653	22.5541	23.2783	22.3654	22.7455	22.2183	21.918	22.1918	22.4843	22.9991	22.587	23.3685	23.1031	22.6804	23.0859	22.8446	22.5165	22.7153	23.0804	63784000	4	2	16.7		NaN	NaN		NaN	NaN		NaN	NaN	A0A0A0MRR7;P09234	A0A0A0MRR7;P09234	U1 small nuclear ribonucleoprotein C	SNRPC	19.687	mRNA 5'-splice site recognition [GO:0000395];mRNA splicing, via spliceosome [GO:0000398];spliceosomal snRNP assembly [GO:0000387];mRNA 5'-splice site recognition [GO:0000395];spliceosomal snRNP assembly [GO:0000387]	mRNA binding [GO:0003729];poly(A) RNA binding [GO:0044822];pre-mRNA 5'-splice site binding [GO:0030627];protein homodimerization activity [GO:0042803];single-stranded RNA binding [GO:0003727];zinc ion binding [GO:0008270];mRNA binding [GO:0003729];U1 snRNA binding [GO:0030619];zinc ion binding [GO:0008270]	Cajal body [GO:0015030];commitment complex [GO:0000243];nucleoplasm [GO:0005654];prespliceosome [GO:0071010];U1 snRNP [GO:0005685];U2-type prespliceosome [GO:0071004];commitment complex [GO:0000243];U1 snRNP [GO:0005685];U2-type prespliceosome [GO:0071004]	GO:0015030;GO:0005685;GO:0071004;GO:0000243;GO:0000395;GO:0003729;GO:0000398;GO:0005654;GO:0044822;GO:0030627;GO:0071010;GO:0042803;GO:0003727;GO:0000387;GO:0008270;GO:0030619;GO:0005685;GO:0071004;GO:0000243;GO:0000395;GO:0003729;GO:0000387;GO:0008270
28.3292	28.1335	28.1273	28.3183	27.8739	27.7996	23.6112	22.8038	22.7462	21.5438	22.8301	21.621	22.6092	21.3444	20.8477	22.9202	23.0866	21.9541	22.963	22.2904	517980000	128	30	28.7		0.497446	-0.1994		NaN	NaN		NaN	NaN	A0A0A0MRV0;Q9P2E9;A0A087WVV2;A0A087WU26;A2A2S5;V9GY78;H0YDJ4;H9KV85;E9PN67;C9J066;Q8N4C6	A0A0A0MRV0;Q9P2E9;A0A087WVV2	Ribosome-binding protein 1	RRBP1	152.45	centrosome localization [GO:0051642];centrosome-templated microtubule nucleation [GO:0090222];microtubule anchoring at centrosome [GO:0034454];osteoblast differentiation [GO:0001649];protein transport [GO:0015031];translation [GO:0006412];protein transport [GO:0015031];microtubule anchoring at centrosome [GO:0034454];microtubule anchoring at centrosome [GO:0034454];microtubule anchoring at centro…	calcium ion binding [GO:0005509];GTP binding [GO:0005525];poly(A) RNA binding [GO:0044822];receptor activity [GO:0004872];calcium ion binding [GO:0005509];calcium ion binding [GO:0005509]	centriole [GO:0005814];centrosome [GO:0005813];microtubule [GO:0005874];nucleolus [GO:0005730];pericentriolar material [GO:0000242];spindle pole [GO:0000922];endoplasmic reticulum [GO:0005783];integral component of endoplasmic reticulum membrane [GO:0030176];membrane [GO:0016020];ribosome [GO:0005840];integral component of endoplasmic reticulum membrane [GO:0030176];centrosome [GO:0005813];centro…	GO:0005525;GO:0005509;GO:0005814;GO:0005813;GO:0051642;GO:0090222;GO:0005874;GO:0034454;GO:0005730;GO:0000242;GO:0000922;GO:0005783;GO:0030176;GO:0016020;GO:0001649;GO:0044822;GO:0015031;GO:0004872;GO:0005840;GO:0006412;GO:0030176;GO:0015031;GO:0005813;GO:0034454;GO:0005509;GO:0005813;GO:0034454;GO:0005813;GO:0034454;GO:0030176;GO:0015031;GO:0005509;GO:0005813;GO:0034454;GO:0005730
23.162	23.695	22.1364	22.2452	21.889	21.1439	22.7521	21.5183	22.8943	22.4677	23.2233	22.7234	25.0794	23.9928	22.2752	23.5226	23.8913	24.7284	24.0496	24.2437	220920000	16	4	2.3		NaN	NaN		NaN	NaN		0.379257	0.574515	A0A0A0MS59;A0A0C4DFX4;Q6ZRS2;A0A087X0E3	A0A0A0MS59;A0A0C4DFX4;Q6ZRS2;A0A087X0E3	Helicase SRCAP	SRCAP	315.61	histone acetylation [GO:0016573];regulation of transcription from RNA polymerase II promoter [GO:0006357];transcription, DNA-templated [GO:0006351];viral process [GO:0016032]	ATP binding [GO:0005524];DNA binding [GO:0003677];helicase activity [GO:0004386];histone acetyltransferase activity [GO:0004402];transcription coactivator activity [GO:0003713];ATP binding [GO:0005524];DNA binding [GO:0003677];ATP binding [GO:0005524];DNA binding [GO:0003677];ATP binding [GO:0005524]	Golgi apparatus [GO:0005794];nucleus [GO:0005634];perinuclear region of cytoplasm [GO:0048471];protein complex [GO:0043234]	GO:0005524;GO:0003677;GO:0005794;GO:0004386;GO:0016573;GO:0004402;GO:0005634;GO:0048471;GO:0043234;GO:0006357;GO:0003713;GO:0006351;GO:0016032;GO:0005524;GO:0003677;GO:0005524;GO:0003677;GO:0005524
22.7679	22.2058	22.4343	22.9203	22.5025	22.3403	20.7589	22.3724	21.7935	22.9274	21.802	21.7872	23.0607	21.4792	22.4403	22.9369	24.7964	23.1392	21.8254	22.7795	78797000	8	3	10.4		NaN	NaN		NaN	NaN		NaN	NaN	E9PF18;A0A0A0MSE2;Q16836	E9PF18;A0A0A0MSE2;Q16836	Hydroxyacyl-coenzyme A dehydrogenase, mitochondrial	HADH	35.236	cellular lipid metabolic process [GO:0044255];fatty acid beta-oxidation [GO:0006635];negative regulation of insulin secretion [GO:0046676];response to activity [GO:0014823];response to drug [GO:0042493];response to insulin [GO:0032868];small molecule metabolic process [GO:0044281];fatty acid metabolic process [GO:0006631];fatty acid metabolic process [GO:0006631]	3-hydroxyacyl-CoA dehydrogenase activity [GO:0003857];NAD+ binding [GO:0070403];3-hydroxyacyl-CoA dehydrogenase activity [GO:0003857];NAD+ binding [GO:0070403];3-hydroxyacyl-CoA dehydrogenase activity [GO:0003857]	cytoplasm [GO:0005737];mitochondrial inner membrane [GO:0005743];mitochondrial matrix [GO:0005759];mitochondrion [GO:0005739];nucleoplasm [GO:0005654];mitochondrion [GO:0005739];nucleoplasm [GO:0005654]	GO:0003857;GO:0070403;GO:0044255;GO:0005737;GO:0006635;GO:0005743;GO:0005759;GO:0005739;GO:0046676;GO:0005654;GO:0014823;GO:0042493;GO:0032868;GO:0044281;GO:0003857;GO:0070403;GO:0006631;GO:0005739;GO:0005654;GO:0003857;GO:0006631
21.9511	22.2963	23.0236	21.8348	22.4406	22.164	25.7711	21.5013	22.2638	23.5552	22.6889	25.6749	24.4413	25.9734	25.1521	24.9895	24.8273	25.3502	25.0671	25.448	510850000	44	9	23		NaN	NaN		NaN	NaN		0.0338911	0.0340753	A0A0A0MSJ0;Q86XP3	A0A0A0MSJ0;Q86XP3	ATP-dependent RNA helicase DDX42	DDX42	77.813	protein localization [GO:0008104];RNA secondary structure unwinding [GO:0010501]	ATP binding [GO:0005524];ATP-dependent RNA helicase activity [GO:0004004];poly(A) RNA binding [GO:0044822];ATP binding [GO:0005524];helicase activity [GO:0004386];nucleic acid binding [GO:0003676]	Cajal body [GO:0015030];cytoplasm [GO:0005737];membrane [GO:0016020];nuclear speck [GO:0016607];nucleoplasm [GO:0005654];nucleus [GO:0005634]	GO:0005524;GO:0004004;GO:0015030;GO:0010501;GO:0005737;GO:0016020;GO:0016607;GO:0005654;GO:0005634;GO:0044822;GO:0008104;GO:0005524;GO:0004386;GO:0003676
21.2028	22.8347	22.7633	22.965	22.3931	21.8191	23.3003	23.154	23.4018	23.5449	23.0273	23.5392	21.9294	22.551	23.3316	22.2379	22.0207	22.902	22.0758	22.3068	17496000	7	4	5.5		NaN	NaN		0.173194	0.0851002		NaN	NaN	A0A0A0MSJ9;Q15283	A0A0A0MSJ9;Q15283	Ras GTPase-activating protein 2	RASA2	96.999	activation of MAPKK activity [GO:0000186];axon guidance [GO:0007411];epidermal growth factor receptor signaling pathway [GO:0007173];Fc-epsilon receptor signaling pathway [GO:0038095];fibroblast growth factor receptor signaling pathway [GO:0008543];innate immune response [GO:0045087];insulin receptor signaling pathway [GO:0008286];MAPK cascade [GO:0000165];negative regulation of Ras protein signa…	GTPase activator activity [GO:0005096];metal ion binding [GO:0046872];GTPase activator activity [GO:0005096]	cytoplasm [GO:0005737];cytosol [GO:0005829];intrinsic component of the cytoplasmic side of the plasma membrane [GO:0031235];perinuclear region of cytoplasm [GO:0048471];intracellular [GO:0005622]	GO:0038095;GO:0005096;GO:0000165;GO:0007265;GO:0000186;GO:0007411;GO:0005737;GO:0005829;GO:0007173;GO:0008543;GO:0045087;GO:0008286;GO:0031235;GO:0046872;GO:0046580;GO:0048011;GO:0048471;GO:0043547;GO:0007165;GO:0007264;GO:0048010;GO:0005096;GO:0005622;GO:0035556
21.2991	22.9747	22.9297	22.5979	22.9202	22.1589	21.4929	22.1858	23.4917	22.293	22.4361	22.7593	22.1537	21.658	22.1994	21.327	21.3513	23.6833	23.4584	23.9555	123680000	12	6	19.7		NaN	NaN		NaN	NaN		NaN	NaN	A0A0A0MSK5;Q5JTV8;H0YD16;H0YDU3;H0Y4R4	A0A0A0MSK5;Q5JTV8;H0YD16	Torsin-1A-interacting protein 1	TOR1AIP1	52.406	nuclear membrane organization [GO:0071763];positive regulation of ATPase activity [GO:0032781];protein localization to nucleus [GO:0034504]	ATPase activator activity [GO:0001671];ATPase binding [GO:0051117];cytoskeletal protein binding [GO:0008092]	integral component of membrane [GO:0016021];nuclear inner membrane [GO:0005637];nucleus [GO:0005634];integral component of membrane [GO:0016021];integral component of membrane [GO:0016021]	GO:0001671;GO:0051117;GO:0008092;GO:0016021;GO:0005637;GO:0071763;GO:0005634;GO:0032781;GO:0034504;GO:0016021;GO:0016021
21.7791	22.6615	21.9752	22.2213	22.0168	22.7163	23.9084	22.4504	22.5012	22.0718	21.4147	21.9441	24.6414	24.1612	24.0682	24.5684	24.0148	24.1884	23.9339	24.5784	207830000	20	5	10		NaN	NaN		NaN	NaN		0.390563	-0.180924	A0A0A0MSN7;O60678	A0A0A0MSN7;O60678	Protein arginine N-methyltransferase 3	PRMT3	52.901	histone arginine methylation [GO:0034969];negative regulation of protein ubiquitination [GO:0031397];peptidyl-arginine methylation, to asymmetrical-dimethyl arginine [GO:0019919];peptidyl-arginine N-methylation [GO:0035246];regulation of transcription, DNA-templated [GO:0006355];protein methylation [GO:0006479]	histone-arginine N-methyltransferase activity [GO:0008469];metal ion binding [GO:0046872];methyltransferase activity [GO:0008168];protein-arginine N-methyltransferase activity [GO:0016274];protein-arginine omega-N asymmetric methyltransferase activity [GO:0035242];methyltransferase activity [GO:0008168]	cytoplasm [GO:0005737];cytosol [GO:0005829];ribosome [GO:0005840]	GO:0005737;GO:0005829;GO:0034969;GO:0008469;GO:0046872;GO:0008168;GO:0031397;GO:0035246;GO:0019919;GO:0016274;GO:0035242;GO:0006355;GO:0005840;GO:0008168;GO:0006479
26.7762	26.64	26.7914	26.8429	26.928	26.7415	22.7976	21.8891	22.6443	22.3174	21.8778	23.2827	22.8157	22.0343	22.8172	22.2355	23.3063	21.5295	22.8907	22.6926	206060000	31	8	24.6		0.63361	0.1016		NaN	NaN		NaN	NaN	A0A0A0MSQ0;P13797;U3KQI3;H7C4N2;Q14651	A0A0A0MSQ0;P13797	Plastin-3	PLS3	69.334	intestinal D-glucose absorption [GO:0001951];positive regulation of establishment of protein localization to plasma membrane [GO:0090004];positive regulation of multicellular organism growth [GO:0040018];regulation of microvillus length [GO:0032532];terminal web assembly [GO:1902896];auditory receptor cell differentiation [GO:0042491];bone development [GO:0060348]	actin filament binding [GO:0051015];calcium ion binding [GO:0005509];structural constituent of cytoskeleton [GO:0005200];calcium ion binding [GO:0005509];calcium ion binding [GO:0005509];calcium ion binding [GO:0005509]	brush border [GO:0005903];extracellular exosome [GO:0070062];terminal web [GO:1990357];cytoplasm [GO:0005737];stereocilium [GO:0032420]	GO:0051015;GO:0005903;GO:0005509;GO:0070062;GO:0001951;GO:0090004;GO:0040018;GO:0032532;GO:0005200;GO:1990357;GO:1902896;GO:0042491;GO:0060348;GO:0005509;GO:0005737;GO:0032420;GO:0005509;GO:0005509
31.8033	31.8339	31.5972	31.5522	31.6276	31.4806	21.3429	22.3811	22.8657	21.0223	23.7712	21.8682	26.3431	26.9637	25.9828	26.0694	25.8188	26.1809	25.8507	26.1893	6405800000	163	22	75.9		1.05028	-0.191334		NaN	NaN		0.648175	-0.329824	A0A0A0MSS8;P42330;S4R3Z2;S4R3D5	A0A0A0MSS8;P42330;S4R3Z2	Aldo-keto reductase family 1 member C3	AKR1C3	36.867	arachidonic acid metabolic process [GO:0019369];cellular response to cadmium ion [GO:0071276];cellular response to calcium ion [GO:0071277];cellular response to corticosteroid stimulus [GO:0071384];cellular response to jasmonic acid stimulus [GO:0071395];cellular response to prostaglandin D stimulus [GO:0071799];cellular response to prostaglandin stimulus [GO:0071379];cellular response to reactiv…	15-hydroxyprostaglandin-D dehydrogenase (NADP+) activity [GO:0047020];alditol:NADP+ 1-oxidoreductase activity [GO:0004032];aldo-keto reductase (NADP) activity [GO:0004033];androsterone dehydrogenase activity [GO:0047023];delta4-3-oxosteroid 5beta-reductase activity [GO:0047787];dihydrotestosterone 17-beta-dehydrogenase activity [GO:0035410];geranylgeranyl reductase activity [GO:0045550];indanol d…	cytoplasm [GO:0005737];cytosol [GO:0005829];extracellular exosome [GO:0070062];intracellular [GO:0005622];nucleus [GO:0005634]	GO:0047020;GO:0007186;GO:0004032;GO:0004033;GO:0047023;GO:0019369;GO:0071276;GO:0071277;GO:0071384;GO:0071395;GO:0071799;GO:0071379;GO:0034614;GO:0009267;GO:0019371;GO:0005737;GO:0005829;GO:0044597;GO:0047787;GO:0035410;GO:0044598;GO:0070062;GO:0016488;GO:0006775;GO:0045550;GO:0047718;GO:0005622;GO:0030216;GO:0045703;GO:0047086;GO:0008584;GO:0044259;GO:1900053;GO:0005634;GO:0055114;GO:0016655;GO:…
22.2762	24.1473	20.8083	23.0639	23.6827	23.2568	23.6976	24.0341	24.045	27.0353	27.2446	27.3241	23.2878	22.8298	22.6314	23.0393	23.1316	21.5418	22.8234	23.0633	179550000	29	4	10		NaN	NaN	+	4.66845	3.27577		NaN	NaN	A0A0G2JKZ1;A2AB90;A0A0G2JH37;A0A0A0MSV9;O15533;Q6P1N7;C9JA35;A0A0A0MT98	A0A0G2JKZ1;A2AB90;A0A0G2JH37;A0A0A0MSV9;O15533;Q6P1N7;C9JA35;A0A0A0MT98	Tapasin	TAPBP	47.606	amide transport [GO:0042886];antigen processing and presentation of endogenous peptide antigen via MHC class I [GO:0019885];antigen processing and presentation of exogenous peptide antigen via MHC class I [GO:0042590];antigen processing and presentation of exogenous peptide antigen via MHC class I, TAP-dependent [GO:0002479];antigen processing and presentation of peptide antigen via MHC class I […	MHC class I protein binding [GO:0042288];peptide antigen binding [GO:0042605];peptide antigen-transporting ATPase activity [GO:0015433];TAP1 binding [GO:0046978];TAP2 binding [GO:0046979];unfolded protein binding [GO:0051082]	endoplasmic reticulum [GO:0005783];endoplasmic reticulum membrane [GO:0005789];Golgi membrane [GO:0000139];integral component of lumenal side of endoplasmic reticulum membrane [GO:0071556];integral component of membrane [GO:0016021];MHC class I peptide loading complex [GO:0042824];integral component of membrane [GO:0016021];integral component of membrane [GO:0016021];MHC class I peptide loading c…	GO:0000139;GO:0042824;GO:0042288;GO:0046978;GO:0046979;GO:0042886;GO:0019885;GO:0042590;GO:0002479;GO:0002474;GO:0005783;GO:0005789;GO:0006955;GO:0071556;GO:0016021;GO:0042605;GO:0050823;GO:0015433;GO:0015833;GO:0006461;GO:0010468;GO:0061635;GO:0006890;GO:0051082;GO:0016021;GO:0019885;GO:0016021;GO:0042824;GO:0002397;GO:0019885;GO:0002479;GO:0006952;GO:0019885;GO:0016021;GO:0019885;GO:0016021;GO:…
22.673	22.4347	21.0435	22.2416	22.9032	22.2997	24.496	24.8784	24.6974	24.8318	24.5332	24.8561	25.2023	24.7658	24.9198	23.9811	25.0111	25.2532	24.7696	24.6616	338110000	35	8	38		NaN	NaN		0.11968	0.0497665		0.295052	0.206625	A0A0A0MSW4;P48739;B3KYB6;B3KYB7	A0A0A0MSW4;P48739;B3KYB6;B3KYB7	Phosphatidylinositol transfer protein beta isoform	PITPNB	31.581	glycerophospholipid biosynthetic process [GO:0046474];in utero embryonic development [GO:0001701];lipid metabolic process [GO:0006629];phospholipid metabolic process [GO:0006644];phospholipid transport [GO:0015914];small molecule metabolic process [GO:0044281];transport [GO:0006810];transport [GO:0006810];transport [GO:0006810]	lipid binding [GO:0008289]	endoplasmic reticulum membrane [GO:0005789];extracellular exosome [GO:0070062];Golgi membrane [GO:0000139];intracellular [GO:0005622];intracellular [GO:0005622];intracellular [GO:0005622]	GO:0000139;GO:0005789;GO:0070062;GO:0046474;GO:0001701;GO:0008289;GO:0006629;GO:0006644;GO:0015914;GO:0044281;GO:0005622;GO:0006810;GO:0005622;GO:0006810;GO:0005622;GO:0006810
24.155	23.9881	22.9849	23.9363	24.4359	24.1631	21.9474	22.3174	21.7553	22.4096	22.3182	22.4148	22.946	23.1996	23.4539	22.8108	21.7218	22.6679	22.0271	22.0964	155430000	16	4	10.9		0.521032	0.500408		NaN	NaN		NaN	NaN	A0A0A0MTN9;A0A0A0MTR6;A0A0C4DFN8;A0A0A0MSZ4;A0A0A0MT64;P22570;J3QQX3;A0A0C4DGN7;J3QKZ8;J3QQW7	A0A0A0MTN9;A0A0A0MTR6;A0A0C4DFN8;A0A0A0MSZ4;A0A0A0MT64;P22570;J3QQX3;A0A0C4DGN7;J3QKZ8	NADPH:adrenodoxin oxidoreductase, mitochondrial	FDXR	48.027	C21-steroid hormone biosynthetic process [GO:0006700];cholesterol metabolic process [GO:0008203];generation of precursor metabolites and energy [GO:0006091];oxidation-reduction process [GO:0055114];small molecule metabolic process [GO:0044281];steroid biosynthetic process [GO:0006694];steroid metabolic process [GO:0008202];sterol metabolic process [GO:0016125];xenobiotic metabolic process [GO:000…	ferredoxin-NADP+ reductase activity [GO:0004324];NADPH-adrenodoxin reductase activity [GO:0015039];oxidoreductase activity [GO:0016491];oxidoreductase activity [GO:0016491];oxidoreductase activity [GO:0016491];oxidoreductase activity [GO:0016491];NADPH-adrenodoxin reductase activity [GO:0015039];NADPH binding [GO:0070402];oxidoreductase activity [GO:0016491];oxidoreductase activity [GO:0016491];o…	mitochondrial matrix [GO:0005759];mitochondrion [GO:0005739];mitochondrial matrix [GO:0005759];mitochondrial matrix [GO:0005759];mitochondrial matrix [GO:0005759];mitochondrial matrix [GO:0005759];mitochondrial inner membrane [GO:0005743];mitochondrial matrix [GO:0005759];mitochondrial matrix [GO:0005759]	GO:0006700;GO:0015039;GO:0008203;GO:0004324;GO:0006091;GO:0005759;GO:0005739;GO:0055114;GO:0044281;GO:0006694;GO:0008202;GO:0016125;GO:0006805;GO:0005759;GO:0016491;GO:0005759;GO:0016491;GO:0005759;GO:0016491;GO:0005759;GO:0016491;GO:0070402;GO:0070995;GO:0015039;GO:0005743;GO:0005759;GO:0005759;GO:0016491;GO:0016491;GO:0016491
21.8039	21.3143	22.1383	22.8695	21.7661	23.727	25.8844	26.0152	26.1129	25.9965	27.9767	28.2117	21.8427	22.2084	22.2342	21.6006	23.5261	23.8051	23.7022	24.9167	287960000	68	20	20.7		NaN	NaN		0.920709	1.3908		2.58548	2.08922	X6R433;A0A0A0MT22;P08575;M3ZCP1;A0A075B788;E9PKH0;A0A0G2JNW2;M9MMK9	X6R433;A0A0A0MT22;P08575;M3ZCP1;A0A075B788;E9PKH0	Protein-tyrosine-phosphatase;Receptor-type tyrosine-protein phosphatase C	PTPRC	131.13	axon guidance [GO:0007411];B cell proliferation [GO:0042100];B cell receptor signaling pathway [GO:0050853];bone marrow development [GO:0048539];cell cycle phase transition [GO:0044770];cell surface receptor signaling pathway [GO:0007166];defense response to virus [GO:0051607];dephosphorylation [GO:0016311];hematopoietic progenitor cell differentiation [GO:0002244];immunoglobulin biosynthetic pro…	protein kinase binding [GO:0019901];protein tyrosine phosphatase activity [GO:0004725];transmembrane receptor protein tyrosine phosphatase activity [GO:0005001];heparin binding [GO:0008201];protein tyrosine phosphatase activity [GO:0004725];protein tyrosine phosphatase activity [GO:0004725];protein tyrosine phosphatase activity [GO:0004725];protein tyrosine phosphatase activity [GO:0004725];prote…	cell surface [GO:0009986];external side of plasma membrane [GO:0009897];extracellular exosome [GO:0070062];focal adhesion [GO:0005925];integral component of plasma membrane [GO:0005887];intracellular [GO:0005622];membrane [GO:0016020];membrane raft [GO:0045121];plasma membrane [GO:0005886];cell surface [GO:0009986];integral component of plasma membrane [GO:0005887];integral component of membrane …	GO:0042100;GO:0050853;GO:0030217;GO:0050852;GO:0007411;GO:0048539;GO:0044770;GO:0009986;GO:0007166;GO:0051607;GO:0016311;GO:0009897;GO:0070062;GO:0005925;GO:0002244;GO:0002378;GO:0005887;GO:0005622;GO:0016020;GO:0045121;GO:0001915;GO:0006933;GO:0001960;GO:0006469;GO:0035335;GO:0005886;GO:0030890;GO:0042102;GO:0050857;GO:2000473;GO:0045860;GO:2000648;GO:0006470;GO:0019901;GO:0004725;GO:0051726;GO:…
21.8329	23.3617	24.9942	25.1033	21.6177	25.5155	27.9751	27.8559	27.9918	28.0102	27.5032	27.6026	27.2835	27.2484	26.9353	27.4344	27.0874	27.0543	27.3348	28.0002	2363600000	128	19	26.6		NaN	NaN		0.663572	-0.2356		0.239613	0.143775	A0A0A0MTB8;Q8NI36	A0A0A0MTB8;Q8NI36	WD repeat-containing protein 36	WDR36	99.365	regulation of axon extension [GO:0030516];response to stimulus [GO:0050896];retina homeostasis [GO:0001895];rRNA processing [GO:0006364];visual perception [GO:0007601];rRNA processing [GO:0006364]	poly(A) RNA binding [GO:0044822]	nucleolus [GO:0005730];small-subunit processome [GO:0032040];small-subunit processome [GO:0032040]	GO:0005730;GO:0044822;GO:0006364;GO:0030516;GO:0050896;GO:0001895;GO:0032040;GO:0007601;GO:0006364;GO:0032040
27.9636	28.2202	28.2752	27.8002	28.2492	28.197	29.8083	29.7649	30.1743	29.4981	29.2974	29.3041	26.7595	27.6161	27.3071	27.8522	27.0232	27.4661	27.2723	26.6866	3338200000	496	94	23.4		0.15478	-0.0708663		1.70898	-0.5493		0.414591	-0.271675	A0A0A0MTR7;A0A0A0MTC1;Q63HN8;I3L3H9	A0A0A0MTR7;A0A0A0MTC1;Q63HN8	E3 ubiquitin-protein ligase RNF213	RNF213	591.4	protein autoubiquitination [GO:0051865];protein ubiquitination [GO:0016567]	ATPase activity [GO:0016887];ligase activity [GO:0016874];ubiquitin-protein transferase activity [GO:0004842];zinc ion binding [GO:0008270];ATPase activity [GO:0016887];ubiquitin-protein transferase activity [GO:0004842];zinc ion binding [GO:0008270];ATPase activity [GO:0016887];ubiquitin-protein transferase activity [GO:0004842];zinc ion binding [GO:0008270]	cytoplasm [GO:0005737];membrane [GO:0016020];nucleolus [GO:0005730]	GO:0016887;GO:0005737;GO:0016874;GO:0016020;GO:0005730;GO:0051865;GO:0016567;GO:0004842;GO:0008270;GO:0016887;GO:0004842;GO:0008270;GO:0016887;GO:0004842;GO:0008270
24.0065	21.6717	22.6314	23.6027	23.1265	22.5164	24.5138	24.8916	25.1031	24.8221	21.8079	24.657	23.178	22.5038	22.8846	23.128	22.9589	23.7876	22.9779	23.2047	160350000	23	3	7.5		NaN	NaN		0.478099	-0.810717		0.588113	0.308675	A0A0A0MTH3;Q13418	A0A0A0MTH3;Q13418	Integrin-linked protein kinase	ILK	54.611	branching involved in ureteric bud morphogenesis [GO:0001658];cell aging [GO:0007569];cell cycle arrest [GO:0007050];cell junction assembly [GO:0034329];cell-matrix adhesion [GO:0007160];cell proliferation [GO:0008283];establishment or maintenance of epithelial cell apical/basal polarity [GO:0045197];extracellular fibril organization [GO:0043206];fibroblast migration [GO:0010761];integrin-mediate…	ATP binding [GO:0005524];protein kinase binding [GO:0019901];protein serine/threonine kinase activity [GO:0004674];signal transducer activity [GO:0004871];ATP binding [GO:0005524];protein kinase activity [GO:0004672]	cell-cell junction [GO:0005911];cell junction [GO:0030054];costamere [GO:0043034];cytoplasm [GO:0005737];cytosol [GO:0005829];dendritic shaft [GO:0043198];extracellular matrix [GO:0031012];focal adhesion [GO:0005925];lamellipodium [GO:0030027];membrane [GO:0016020];neuronal cell body [GO:0043025];nucleoplasm [GO:0005654];plasma membrane [GO:0005886];protein complex [GO:0043234];sarcomere [GO:0030…	GO:0005524;GO:0001658;GO:0007569;GO:0007050;GO:0030054;GO:0034329;GO:0008283;GO:0005911;GO:0007160;GO:0043034;GO:0005737;GO:0005829;GO:0043198;GO:0045197;GO:0043206;GO:0031012;GO:0010761;GO:0005925;GO:0007229;GO:0030027;GO:0016020;GO:0032288;GO:0022011;GO:0010667;GO:2000178;GO:0043524;GO:0006469;GO:0014912;GO:0048662;GO:0021675;GO:0048812;GO:0043025;GO:0005654;GO:0003151;GO:0018105;GO:0005886;GO:…
22.4865	21.9195	22.6421	22.478	22.1383	22.6617	24.0507	24.1698	24.6524	24.8304	24.6943	24.7604	24.5816	23.7892	24.49	24.8107	24.0792	24.3519	24.3169	24.3557	221700000	44	12	9.8		NaN	NaN		1.17659	0.470734		0.25214	-0.14195	A0A0A0MTH9;O14981	A0A0A0MTH9;O14981	TATA-binding protein-associated factor 172	BTAF1	206.93	negative regulation of chromatin binding [GO:0035562];negative regulation of transcription, DNA-templated [GO:0045892]	ATP binding [GO:0005524];DNA binding [GO:0003677];helicase activity [GO:0004386];transcription factor activity, sequence-specific DNA binding [GO:0003700];ATP binding [GO:0005524]	intracellular membrane-bounded organelle [GO:0043231];nucleoplasm [GO:0005654]	GO:0005524;GO:0003677;GO:0004386;GO:0043231;GO:0035562;GO:0045892;GO:0005654;GO:0003700;GO:0005524
22.4788	22.545	22.3278	23.8653	24.0015	22.9911	25.7255	25.5769	26.0387	27.1086	27.502	27.739	25.7601	24.4746	24.6705	24.3678	27.0558	25.7675	25.5223	26.0174	896290000	27	3	11.8		NaN	NaN		2.72733	1.6695		1.47007	1.2725	A0A0A0MTI6;Q9NYP7;Q9NXB9	A0A0A0MTI6;Q9NYP7	Elongation of very long chain fatty acids protein;Elongation of very long chain fatty acids protein 5	ELOVL5	30.742	alpha-linolenic acid metabolic process [GO:0036109];cellular lipid metabolic process [GO:0044255];fatty acid elongation, monounsaturated fatty acid [GO:0034625];fatty acid elongation, polyunsaturated fatty acid [GO:0034626];linoleic acid metabolic process [GO:0043651];long-chain fatty-acyl-CoA biosynthetic process [GO:0035338];small molecule metabolic process [GO:0044281];triglyceride biosyntheti…	fatty acid elongase activity [GO:0009922];fatty acid elongase activity [GO:0009922];transferase activity [GO:0016740]	dendrite [GO:0030425];dendritic tree [GO:0097447];endoplasmic reticulum [GO:0005783];endoplasmic reticulum membrane [GO:0005789];integral component of membrane [GO:0016021];membrane [GO:0016020];neuronal cell body [GO:0043025];endoplasmic reticulum [GO:0005783];endoplasmic reticulum membrane [GO:0005789];integral component of membrane [GO:0016021];integral component of membrane [GO:0016021]	GO:0036109;GO:0044255;GO:0030425;GO:0097447;GO:0005783;GO:0005789;GO:0009922;GO:0034625;GO:0034626;GO:0016021;GO:0043651;GO:0035338;GO:0016020;GO:0043025;GO:0044281;GO:0019432;GO:0006636;GO:0033559;GO:0042761;GO:0036109;GO:0044255;GO:0005783;GO:0005789;GO:0009922;GO:0034626;GO:0016021;GO:0043651;GO:0035338;GO:0044281;GO:0019432;GO:0006636;GO:0033559;GO:0042761;GO:0006633;GO:0016021;GO:0016740
25.0029	24.871	24.8265	25.7234	25.2692	25.6302	21.8629	23.4579	22.2672	25.1636	25.1091	25.1834	22.6886	21.3457	21.7722	23.0446	24.5246	22.3972	24.8784	24.9239	245340000	30	8	21.8		1.90539	0.6408	+	2.9319	2.15653		NaN	NaN	A0A0R4J2G3;A0A0A0MTJ9;Q6PIU2;H7C046	A0A0R4J2G3;A0A0A0MTJ9;Q6PIU2;H7C046	Neutral cholesterol ester hydrolase 1	NCEH1	49.062	lipid catabolic process [GO:0016042];protein dephosphorylation [GO:0006470];SMAD protein signal transduction [GO:0060395];xenobiotic metabolic process [GO:0006805]	carboxylic ester hydrolase activity [GO:0052689];carboxylic ester hydrolase activity [GO:0052689];hydrolase activity [GO:0016787];carboxylic ester hydrolase activity [GO:0052689];phosphate ion binding [GO:0042301];serine hydrolase activity [GO:0017171]	endoplasmic reticulum [GO:0005783];integral component of membrane [GO:0016021];membrane [GO:0016020];integral component of membrane [GO:0016021];integral component of membrane [GO:0016021];integral component of membrane [GO:0016021]	GO:0052689;GO:0005783;GO:0016021;GO:0016042;GO:0016020;GO:0052689;GO:0016021;GO:0016787;GO:0016021;GO:0060395;GO:0052689;GO:0016021;GO:0042301;GO:0006470;GO:0017171;GO:0006805
20.3415	23.1721	23.3964	23.3069	21.6267	21.8174	23.2388	21.4743	22.1601	23.2898	23.1302	22.5583	23.255	22.888	23.5853	23.683	23.3354	23.5743	23.1141	23.1846	143060000	30	10	17.3		NaN	NaN		NaN	NaN		0.196987	0.157736	Q5T2B5;A0A0A0MTN0;Q13617;Q5T2B7	Q5T2B5;A0A0A0MTN0;Q13617	Cullin-2	CUL2	82.358	cell cycle arrest [GO:0007050];cellular response to hypoxia [GO:0071456];G1/S transition of mitotic cell cycle [GO:0000082];intrinsic apoptotic signaling pathway [GO:0097193];negative regulation of cell proliferation [GO:0008285];protein ubiquitination involved in ubiquitin-dependent protein catabolic process [GO:0042787];regulation of transcription from RNA polymerase II promoter in response to …	ubiquitin protein ligase binding [GO:0031625]	Cul2-RING ubiquitin ligase complex [GO:0031462];cytosol [GO:0005829];nucleolus [GO:0005730];nucleoplasm [GO:0005654];VCB complex [GO:0030891];cullin-RING ubiquitin ligase complex [GO:0031461];nucleoplasm [GO:0005654];cullin-RING ubiquitin ligase complex [GO:0031461]	GO:0031462;GO:0000082;GO:0030891;GO:0007050;GO:0071456;GO:0005829;GO:0097193;GO:0008285;GO:0005730;GO:0005654;GO:0042787;GO:0061418;GO:0031625;GO:0016032;GO:0031461;GO:0005654;GO:0006511;GO:0031461;GO:0006511;GO:0006511
22.3061	22.6576	22.904	21.9848	22.4317	22.9022	24.4338	24.9098	24.7815	24.4534	24.3506	24.6242	21.2409	22.4926	22.636	23.1709	22.9201	22.7156	21.6135	22.4727	41855000	13	5	27.8		NaN	NaN		0.643291	-0.2323		NaN	NaN	A0A0A0MTN3;P21266	A0A0A0MTN3;P21266	Glutathione S-transferase Mu 3	GSTM3	24.914	cellular detoxification of nitrogen compound [GO:0070458];establishment of blood-nerve barrier [GO:0008065];glutathione derivative biosynthetic process [GO:1901687];glutathione metabolic process [GO:0006749];nitrobenzene metabolic process [GO:0018916];response to estrogen [GO:0043627];small molecule metabolic process [GO:0044281];xenobiotic catabolic process [GO:0042178];xenobiotic metabolic proc…	enzyme binding [GO:0019899];glutathione binding [GO:0043295];glutathione transferase activity [GO:0004364];identical protein binding [GO:0042802];protein homodimerization activity [GO:0042803];glutathione transferase activity [GO:0004364]	cytoplasm [GO:0005737];cytosol [GO:0005829];extracellular exosome [GO:0070062];nucleus [GO:0005634];sperm fibrous sheath [GO:0035686]	GO:0070458;GO:0005737;GO:0005829;GO:0019899;GO:0008065;GO:0070062;GO:0043295;GO:1901687;GO:0006749;GO:0004364;GO:0042802;GO:0018916;GO:0005634;GO:0042803;GO:0043627;GO:0044281;GO:0035686;GO:0042178;GO:0006805;GO:0004364
22.9688	22.6072	22.3407	21.8151	23.3216	21.8126	21.6927	22.7484	22.5711	22.0466	21.9268	21.9961	21.9871	21.9429	21.8859	22.6061	23.2268	23.1478	23.0644	23.1155	98723000	10	5	6.4		NaN	NaN		NaN	NaN		1.94168	0.616594	A0A0A0MTP6;O15357;F5GY16	A0A0A0MTP6;O15357	Phosphatidylinositol 3,4,5-trisphosphate 5-phosphatase 2	INPPL1	126.52	actin filament organization [GO:0007015];cell adhesion [GO:0007155];endochondral ossification [GO:0001958];endocytosis [GO:0006897];glucose metabolic process [GO:0006006];immune system process [GO:0002376];inositol phosphate metabolic process [GO:0043647];negative regulation of cell proliferation [GO:0008285];negative regulation of gene expression [GO:0010629];phosphatidylinositol biosynthetic pr…	hydrolase activity [GO:0016787];SH2 domain binding [GO:0042169];hydrolase activity [GO:0016787]	cytoplasm [GO:0005737];cytoskeleton [GO:0005856];cytosol [GO:0005829];filopodium [GO:0030175];Golgi apparatus [GO:0005794];lamellipodium [GO:0030027];plasma membrane [GO:0005886]	GO:0005794;GO:0042169;GO:0007015;GO:0007155;GO:0005737;GO:0005856;GO:0005829;GO:0001958;GO:0006897;GO:0030175;GO:0006006;GO:0016787;GO:0002376;GO:0043647;GO:0030027;GO:0008285;GO:0010629;GO:0006661;GO:0046856;GO:0006644;GO:0005886;GO:0009791;GO:0032868;GO:0097178;GO:0044281;GO:0016787;GO:0046856
23.313	22.0802	22.8587	22.8307	22.0316	22.1063	24.3689	21.1841	21.6659	23.2189	22.4747	21.9418	24.4563	24.7504	25.6574	24.917	24.6986	24.6163	24.5859	23.4864	290520000	29	6	16.8		NaN	NaN		NaN	NaN		0.766799	-0.598475	A0A0A0MTR2;Q8N543;H3BR79;H3BUA6;H3BR02	A0A0A0MTR2;Q8N543;H3BR79	Prolyl 3-hydroxylase OGFOD1	OGFOD1	58.378	cell proliferation [GO:0008283];peptidyl-proline hydroxylation [GO:0019511];protein hydroxylation [GO:0018126];regulation of translational termination [GO:0006449];stress granule assembly [GO:0034063]	iron ion binding [GO:0005506];L-ascorbic acid binding [GO:0031418];peptidyl-proline 3-dioxygenase activity [GO:0031544];peptidyl-proline dioxygenase activity [GO:0031543];iron ion binding [GO:0005506];L-ascorbic acid binding [GO:0031418];oxidoreductase activity, acting on paired donors, with incorporation or reduction of molecular oxygen, 2-oxoglutarate as one donor, and incorporation of one atom…	cytoplasm [GO:0005737];cytoplasmic stress granule [GO:0010494];nucleus [GO:0005634]	GO:0031418;GO:0008283;GO:0005737;GO:0010494;GO:0005506;GO:0005634;GO:0031544;GO:0031543;GO:0019511;GO:0018126;GO:0006449;GO:0034063;GO:0031418;GO:0005506;GO:0016706;GO:0031418;GO:0005506;GO:0016705
28.9797	29.0938	29.0723	29.3056	29.2143	29.0934	27.4305	27.6014	27.8274	27.4814	27.5359	27.4363	27.3392	27.4193	27.3376	26.8448	26.9524	27.4746	27.0755	27.3071	2377800000	123	11	23		1.03477	0.155833		0.498332	-0.135234		0.066457	-0.032825	A0A0A0MTS2;P06744;K7EQ48;A0A0J9YXP8;A0A0J9YX90;A0A0J9YYH3;K7EPY4;K7EP41;K7ELR7;K7ENA0;K7EIL4;K7ERK8;K7ERC6;K7ESF4	A0A0A0MTS2;P06744;K7EQ48;A0A0J9YXP8;A0A0J9YX90;A0A0J9YYH3;K7EPY4	Glucose-6-phosphate isomerase	GPI	64.824	aldehyde catabolic process [GO:0046185];angiogenesis [GO:0001525];canonical glycolysis [GO:0061621];carbohydrate metabolic process [GO:0005975];gene expression [GO:0010467];gluconeogenesis [GO:0006094];glucose 6-phosphate metabolic process [GO:0051156];glucose metabolic process [GO:0006006];hemostasis [GO:0007599];humoral immune response [GO:0006959];learning or memory [GO:0007611];methylglyoxal …	glucose-6-phosphate isomerase activity [GO:0004347];intramolecular transferase activity [GO:0016866];monosaccharide binding [GO:0048029];ubiquitin protein ligase binding [GO:0031625];glucose-6-phosphate isomerase activity [GO:0004347];glucose-6-phosphate isomerase activity [GO:0004347];glucose-6-phosphate isomerase activity [GO:0004347];glucose-6-phosphate isomerase activity [GO:0004347];glucose-…	cytoplasm [GO:0005737];cytosol [GO:0005829];extracellular exosome [GO:0070062];extracellular space [GO:0005615];membrane [GO:0016020];neuron projection [GO:0043005];nucleoplasm [GO:0005654];plasma membrane [GO:0005886];cytoplasm [GO:0005737];nucleoplasm [GO:0005654];plasma membrane [GO:0005886]	GO:0046185;GO:0001525;GO:0061621;GO:0005975;GO:0005737;GO:0005829;GO:0070062;GO:0005615;GO:0010467;GO:0006094;GO:0051156;GO:0006006;GO:0004347;GO:0007599;GO:0006959;GO:0016866;GO:0007611;GO:0016020;GO:0019242;GO:0048029;GO:0043154;GO:0043524;GO:0043005;GO:0005654;GO:0005886;GO:0044281;GO:0006367;GO:0031625;GO:0006094;GO:0004347;GO:0006096;GO:0006094;GO:0004347;GO:0006096;GO:0006094;GO:0004347;GO:…
22.4274	22.2763	21.8481	22.8101	21.8755	21.9754	21.5998	22.5306	21.1534	22.4982	23.269	21.7208	23.6253	22.6312	22.4469	22.6116	22.6829	23.1079	23.4392	23.2336	52085000	14	4	5.8		NaN	NaN		NaN	NaN		NaN	NaN	A0A0A6YY96;P48200;H0YNL8;H0YLE0	A0A0A6YY96;P48200;H0YNL8	Iron-responsive element-binding protein 2	IREB2	105.06	cellular iron ion homeostasis [GO:0006879];iron ion transport [GO:0006826];metabolic process [GO:0008152];cellular iron ion homeostasis [GO:0006879];iron ion transport [GO:0006826];metabolic process [GO:0008152];aging [GO:0007568];cellular iron ion homeostasis [GO:0006879];cellular response to hypoxia [GO:0071456];erythrocyte homeostasis [GO:0034101];intestinal absorption [GO:0050892];iron ion tr…	4 iron, 4 sulfur cluster binding [GO:0051539];iron-responsive element binding [GO:0030350];metal ion binding [GO:0046872];RNA binding [GO:0003723];translation repressor activity [GO:0030371];iron-responsive element binding [GO:0030350];translation repressor activity [GO:0030371];iron-responsive element binding [GO:0030350];translation repressor activity [GO:0030371];iron-responsive element bindin…	cytoplasm [GO:0005737];cytoplasm [GO:0005737];cytosol [GO:0005829];mitochondrion [GO:0005739];cytoplasm [GO:0005737]	GO:0051539;GO:0003723;GO:0006879;GO:0005737;GO:0006826;GO:0030350;GO:0008152;GO:0046872;GO:0030371;GO:0006879;GO:0005737;GO:0006826;GO:0030350;GO:0008152;GO:0030371;GO:0007568;GO:0006879;GO:0071456;GO:0005829;GO:0034101;GO:0050892;GO:0006826;GO:0030350;GO:0005739;GO:0030316;GO:0009791;GO:0006782;GO:0010040;GO:0032526;GO:0030371;GO:0006879;GO:0005737;GO:0006826;GO:0030350;GO:0008152;GO:0030371
23.6973	23.9134	24.0676	23.7291	23.6451	23.5554	23.4697	23.5836	22.812	23.213	22.927	21.3719	21.6394	22.8531	21.89	21.8775	21.4629	23.1941	22.541	23.1598	119690000	34	5	17.5		0.987154	-0.249567		0.300761	-0.381012		NaN	NaN	A0A0A6YYC3;A0A0A6YYJ8;Q9Y383	A0A0A6YYC3;A0A0A6YYJ8;Q9Y383	Putative RNA-binding protein Luc7-like 2	C7orf55-LUC7L2;LUC7L2	46.228	mRNA splice site selection [GO:0006376];mRNA splice site selection [GO:0006376];mRNA splice site selection [GO:0006376]	enzyme binding [GO:0019899];mRNA binding [GO:0003729];poly(A) RNA binding [GO:0044822];mRNA binding [GO:0003729];mRNA binding [GO:0003729]	nuclear speck [GO:0016607];U1 snRNP [GO:0005685];U2-type prespliceosome [GO:0071004];U1 snRNP [GO:0005685];U1 snRNP [GO:0005685]	GO:0005685;GO:0071004;GO:0019899;GO:0003729;GO:0006376;GO:0016607;GO:0044822;GO:0005685;GO:0003729;GO:0006376;GO:0005685;GO:0003729;GO:0006376
26.2183	26.1007	26.3658	26.6245	26.6871	26.5033	22.2862	21.5027	22.6704	22.1758	22.7016	23.4192	21.9956	21.7905	22.1879	22.4173	22.1228	23.1374	21.7217	23.548	155000000	15	4	19.6		1.79866	0.376699		NaN	NaN		NaN	NaN	A0A0A6YYL2;P0DMN0;P0DMM9;H3BPL6;H3BRT0;H3BNY7	A0A0A6YYL2;P0DMN0;P0DMM9;H3BPL6	Sulfotransferase;Sulfotransferase 1A4;Sulfotransferase 1A3	SULT1A4;SULT1A3	34.779	3'-phosphoadenosine 5'-phosphosulfate metabolic process [GO:0050427];catecholamine metabolic process [GO:0006584];cellular protein metabolic process [GO:0044267];endoplasmic reticulum unfolded protein response [GO:0030968];flavonoid metabolic process [GO:0009812];IRE1-mediated unfolded protein response [GO:0036498];small molecule metabolic process [GO:0044281];steroid metabolic process [GO:000820…	aryl sulfotransferase activity [GO:0004062];sulfotransferase activity [GO:0008146];aryl sulfotransferase activity [GO:0004062];sulfotransferase activity [GO:0008146];sulfotransferase activity [GO:0008146];sulfotransferase activity [GO:0008146];sulfotransferase activity [GO:0008146]	cytosol [GO:0005829];cytoplasm [GO:0005737]	GO:0050427;GO:0036498;GO:0004062;GO:0006584;GO:0044267;GO:0005829;GO:0030968;GO:0009812;GO:0044281;GO:0008202;GO:0051923;GO:0008146;GO:0006805;GO:0004062;GO:0006584;GO:0005737;GO:0008202;GO:0008146;GO:0008146;GO:0008146;GO:0008146
22.2452	22.8958	22.2635	22.3998	22.3293	22.4935	25.9112	26.0847	26.1634	26.1616	26.4077	26.4839	28.0455	26.5344	27.4055	26.6305	26.6775	27.2861	26.6273	27.5704	1646300000	54	10	15.9		NaN	NaN		1.14382	0.297967		0.0981348	-0.11365	A0A0A6YYL4;P57737;E7EP81;I3L167;I3L351;I3L442;I3L212	A0A0A6YYL4;P57737;E7EP81;I3L167	Coronin;Coronin-7	CORO7-PAM16;CORO7	114.16	actin filament polymerization [GO:0030041];Golgi to endosome transport [GO:0006895];protein transport [GO:0015031]	actin binding [GO:0003779]	cytoplasmic, membrane-bounded vesicle [GO:0016023];cytosol [GO:0005829];Golgi apparatus [GO:0005794];Golgi membrane [GO:0000139];integral component of membrane [GO:0016021];membrane [GO:0016020];trans-Golgi network [GO:0005802]	GO:0005794;GO:0000139;GO:0006895;GO:0003779;GO:0030041;GO:0016023;GO:0005829;GO:0016021;GO:0016020;GO:0015031;GO:0005802
23.4252	22.5552	22.202	21.8214	21.5677	23.2585	23.2933	23.6801	23.6185	23.6193	21.9098	22.2937	22.7073	21.8789	22.5506	22.3049	22.3622	23.0213	21.5923	21.6067	199400000	15	5	6.7		NaN	NaN		0.55577	-0.3716		NaN	NaN	A0A0B4J1V9;Q9NRZ9;A0A087WSW7;F6XU50;Q9NW36;B1ALG6	A0A0B4J1V9;Q9NRZ9;A0A087WSW7;F6XU50	Lymphoid-specific helicase	HELLS	102.71	cell division [GO:0051301];lymphocyte proliferation [GO:0046651];maintenance of DNA methylation [GO:0010216];methylation-dependent chromatin silencing [GO:0006346];mitotic nuclear division [GO:0007067];multicellular organismal development [GO:0007275];pericentric heterochromatin assembly [GO:0031508];transcription, DNA-templated [GO:0006351];DNA methylation [GO:0006306];lymphocyte proliferation […	ATP binding [GO:0005524];helicase activity [GO:0004386];ATP binding [GO:0005524];helicase activity [GO:0004386];ATP binding [GO:0005524];helicase activity [GO:0004386];ATP binding [GO:0005524];chromatin binding [GO:0003682];helicase activity [GO:0004386]	chromosome, centromeric region [GO:0000775];nucleus [GO:0005634];pericentric heterochromatin [GO:0005721];nucleus [GO:0005634];pericentric heterochromatin [GO:0005721]	GO:0005524;GO:0051301;GO:0000775;GO:0004386;GO:0046651;GO:0010216;GO:0006346;GO:0007067;GO:0007275;GO:0005634;GO:0005721;GO:0031508;GO:0006351;GO:0005524;GO:0004386;GO:0005524;GO:0004386;GO:0005524;GO:0006306;GO:0003682;GO:0004386;GO:0046651;GO:0010216;GO:0006346;GO:2001243;GO:0005634;GO:0005721;GO:0031508;GO:0001655
24.6217	25.8012	25.4916	22.7327	23.508	23.0809	25.7381	26.1761	26.1189	25.6767	26.5842	26.6338	25.4242	23.7661	25.0984	24.1938	24.9773	24.6261	24.7653	25.0473	492720000	35	4	30.7		1.4478	-1.98525		0.350688	0.2872		0.237471	0.233376	A0A0B4J1Z1;C9JAB2;Q16629	A0A0B4J1Z1;C9JAB2;Q16629	Serine/arginine-rich splicing factor 7	SRSF7	15.763	gene expression [GO:0010467];mRNA 3'-end processing [GO:0031124];mRNA export from nucleus [GO:0006406];mRNA processing [GO:0006397];mRNA splicing, via spliceosome [GO:0000398];negative regulation of mRNA splicing, via spliceosome [GO:0048025];RNA splicing [GO:0008380];termination of RNA polymerase II transcription [GO:0006369];transcription from RNA polymerase II promoter [GO:0006366]	nucleotide binding [GO:0000166];poly(A) RNA binding [GO:0044822];zinc ion binding [GO:0008270];nucleic acid binding [GO:0003676];nucleotide binding [GO:0000166];zinc ion binding [GO:0008270];nucleic acid binding [GO:0003676];nucleotide binding [GO:0000166];zinc ion binding [GO:0008270]	cytoplasm [GO:0005737];extracellular exosome [GO:0070062];nucleoplasm [GO:0005654];nucleus [GO:0005634];nucleoplasm [GO:0005654]	GO:0008380;GO:0005737;GO:0070062;GO:0010467;GO:0031124;GO:0006406;GO:0006397;GO:0000398;GO:0048025;GO:0005654;GO:0000166;GO:0005634;GO:0044822;GO:0006369;GO:0006366;GO:0008270;GO:0003676;GO:0000166;GO:0008270;GO:0003676;GO:0005654;GO:0000166;GO:0008270
20.914	23.2247	21.046	22.5232	22.9666	21.7268	23.3829	22.9895	22.2823	21.6793	22.087	21.7179	23.009	22.2042	23.0031	22.7218	22.5711	22.7992	22.6738	22.6044	65716000	12	2	9		NaN	NaN		NaN	NaN		0.105109	0.103374	A0A0B4J216;Q6IA69;H0YED2;H0YDH3;E9PNF5	A0A0B4J216;Q6IA69;H0YED2;H0YDH3;E9PNF5	Glutamine-dependent NAD(+) synthetase	NADSYN1	37.493	NAD biosynthetic process [GO:0009435];NAD metabolic process [GO:0019674];small molecule metabolic process [GO:0044281];vitamin metabolic process [GO:0006766];water-soluble vitamin metabolic process [GO:0006767];NAD biosynthetic process [GO:0009435]	ATP binding [GO:0005524];glutaminase activity [GO:0004359];NAD+ synthase (glutamine-hydrolyzing) activity [GO:0003952];ATP binding [GO:0005524];NAD+ synthase (glutamine-hydrolyzing) activity [GO:0003952]	cytoplasm [GO:0005737];cytosol [GO:0005829]	GO:0005524;GO:0009435;GO:0019674;GO:0003952;GO:0005737;GO:0005829;GO:0004359;GO:0044281;GO:0006766;GO:0006767;GO:0005524;GO:0009435;GO:0003952
22.6184	21.4584	21.8194	21.606	22.4863	21.3735	22.1545	22.7012	22.6406	22.7221	22.5687	23.25	23.2684	23.9279	23.979	23.527	24.2492	23.7619	23.1147	24.0746	175550000	22	5	19.3		NaN	NaN		NaN	NaN		0.158588	0.124525	A0A0B4J2A4;P42765;K7EME0;K7ER88;K7EJB1;K7EJ68	A0A0B4J2A4;P42765;K7EME0	3-ketoacyl-CoA thiolase, mitochondrial	ACAA2	41.601	cellular response to hypoxia [GO:0071456];cholesterol biosynthetic process [GO:0006695];fatty acid metabolic process [GO:0006631];negative regulation of mitochondrial membrane permeability involved in apoptotic process [GO:1902109];negative regulation of mitochondrial outer membrane permeabilization involved in apoptotic signaling pathway [GO:1901029]	acetyl-CoA C-acyltransferase activity [GO:0003988];poly(A) RNA binding [GO:0044822];transferase activity, transferring acyl groups other than amino-acyl groups [GO:0016747];transferase activity, transferring acyl groups other than amino-acyl groups [GO:0016747];transferase activity, transferring acyl groups other than amino-acyl groups [GO:0016747];transferase activity, transferring acyl groups o…	extracellular exosome [GO:0070062];mitochondrial inner membrane [GO:0005743];mitochondrion [GO:0005739]	GO:0003988;GO:0071456;GO:0006695;GO:0070062;GO:0006631;GO:0005743;GO:0005739;GO:1902109;GO:1901029;GO:0044822;GO:0016747;GO:0016747;GO:0016747;GO:0016747;GO:0016747
21.9623	22.6479	22.5356	25.1014	25.6137	22.7705	21.7818	22.1119	22.8722	22.7848	21.422	21.5171	21.9711	22.079	23.2404	22.0577	25.4324	25.4623	25.8363	25.1876	350940000	14	6	15.1		NaN	NaN		NaN	NaN	+	4.38895	2.95313	A0A0C4DFL7;Q16850;H7C0D0	A0A0C4DFL7;Q16850	Lanosterol 14-alpha demethylase	CYP51A1	57.278	cholesterol biosynthetic process [GO:0006695];cholesterol biosynthetic process via 24,25-dihydrolanosterol [GO:0033488];demethylation [GO:0070988];small molecule metabolic process [GO:0044281];steroid biosynthetic process [GO:0006694];sterol metabolic process [GO:0016125];xenobiotic metabolic process [GO:0006805];cholesterol biosynthetic process via 24,25-dihydrolanosterol [GO:0033488]	heme binding [GO:0020037];iron ion binding [GO:0005506];sterol 14-demethylase activity [GO:0008398];heme binding [GO:0020037];iron ion binding [GO:0005506];sterol 14-demethylase activity [GO:0008398];heme binding [GO:0020037];iron ion binding [GO:0005506];monooxygenase activity [GO:0004497];oxidoreductase activity, acting on paired donors, with incorporation or reduction of molecular oxygen [GO:0…	endoplasmic reticulum [GO:0005783];endoplasmic reticulum membrane [GO:0005789];integral component of membrane [GO:0016021];membrane [GO:0016020];plasma membrane [GO:0005886];integral component of membrane [GO:0016021];intracellular membrane-bounded organelle [GO:0043231]	GO:0006695;GO:0033488;GO:0070988;GO:0005783;GO:0005789;GO:0020037;GO:0016021;GO:0005506;GO:0016020;GO:0005886;GO:0044281;GO:0006694;GO:0008398;GO:0016125;GO:0006805;GO:0033488;GO:0020037;GO:0016021;GO:0043231;GO:0005506;GO:0008398;GO:0020037;GO:0005506;GO:0004497;GO:0016705
[truncated: 1,965 more rows]

## Sheet: Leukemia hits
Mean LFQ intensity					Mean enrichment (ABPP)			Protein annotation and information														Proteomics DB expression (log10 normalised iBAQ expression)
[truncated: 49 more rows]
