# Supplementary material for: Quantitative chemoproteomic profiling reveals multiple target interactions of spongiolactone derivatives in leukemia cells
Source: Royal Society of Chemistry journal article supplement (doi:10.1039/c7cc04990k), 2017-01-01
Supplement: c7cc04990k6.xlsx [file c7cc04990k6.xlsx]

## Sheet: Key
Supplementary Table S5	Global proteomics with probe 3 in K562 cells. Identification of proteins following treatment with 3, lysis, tryptic digest and LC-MS/MS analysis.
Abbreviations	NaN = not a number (not quantified in proteomics); LFQ = label-free quantification using MaxQuant (log2 intensity)	GO analysis: x = number matching GO categories in sample set; X = total sample set; n = number of matching categories in reference set; N = total reference set.
Definitions	T-test fold-change X/Y = Log2(Mean LFQ sample X/Mean LFQ sample Y)
Experimental design	Experiments a, b, c are technical replicates: 3 plates of cells were labelled and harvested on the same day. Sample lysis and downstream processing was performed together.
Contained in this spreadsheet:
Raw data	Following preliminary quality control	Data were first filtered to first retain only proteins with at least 2 razor+unique peptides.
T-test	Following filtering, missing values imputation and t-test	Data were further filtered to retain only those proteins quantified in triplicate in either DMSO_24h, probe_24h or probe_4h datasets. Missing values were imputed from a normal distribution (width 0.3, downshift 1.8, across total dataset) and a two-sample t-test performed to compare DMSO and 3-treated samples: two sided, permutation-corrected (250 permutations), FDR 0.05, s0 0.3.
GO analysis upregulated	Proteins upregulated (by t-test) in the treatment sample (probe treated vs DMSO treated, both at 24 h).	Gene Ontology analysis was performed in Cytoscape using the BiNGO app. Human gene association (.gaf) and ontology (.obo) files were downloaded from http://www.geneontology.org/ (04/2017). Biological process name space was used to select terms. A hypergeometric test was performed, with selected significance level of 0.05 and Benjamini & Hochberg False Discovery Rate (FDR) correction. Terms highlig…

## Sheet: Raw data
LFQ intensity (log2)
probe_4hr a	probe_4hr b	probe_4hr c	probe_24hr a	probe_24hr b	probe_24hr c	DMSO_24 hr a	DMSO_24 hr b	DMSO_24 hr c	Razor + unique peptides	Sequence coverage [%]	Mol. weight [kDa]	Intensity	MS/MS count	Protein IDs	Majority protein IDs	Protein names	Gene names
25.876	26.4724	25.6514	26.8037	26.8277	26.2943	26.1269	26.5082	26.2297	3	48.2	6.5909	802030000	25	A0A075X6N5;A0A143FYJ4;A0A1B1PEP8;X5BPV5;V9M714;V9JTG4;V5JPT0;U5YV54;U3KX66;T2HIA7;T1SWT3;Q9B1A3;Q8W8E1;Q85KW5;Q7YEE7;Q7YCG7;Q6RMN1;Q6RM58;Q6RLZ4;Q6RLG0;Q6RKZ6;Q5XTF0;Q5SAC3;Q5SAB0;Q5S8W6;Q5S8S7;Q5GND0;Q4F675;Q4F196;Q4EWR0;Q3S937;Q3S924;Q305N4;Q0Z7D7;M1LM67;L7XY67;K9R3Q7;I3Q9B1;H9T6C8;H9T2R7;H9RZ55;H9QNW3;H9QCE6;H9PSV8;H9NQW0;H9E7S1;H6TVP0;G9LL05;G9LF90;G9LC48;G9B020;G3C9Y5;F2WHR5;E5QC94;E2DFE6;E1…	A0A075X6N5;A0A143FYJ4;A0A1B1PEP8;X5BPV5;V9M714;V9JTG4;V5JPT0;U5YV54;U3KX66;T2HIA7;T1SWT3;Q9B1A3;Q8W8E1;Q85KW5;Q7YEE7;Q7YCG7;Q6RMN1;Q6RM58;Q6RLZ4;Q6RLG0;Q6RKZ6;Q5XTF0;Q5SAC3;Q5SAB0;Q5S8W6;Q5S8S7;Q5GND0;Q4F675;Q4F196;Q4EWR0;Q3S937;Q3S924;Q305N4;Q0Z7D7;M1LM67;L7XY67;K9R3Q7;I3Q9B1;H9T6C8;H9T2R7;H9RZ55;H9QNW3;H9QCE6;H9PSV8;H9NQW0;H9E7S1;H6TVP0;G9LL05;G9LF90;G9LC48;G9B020;G3C9Y5;F2WHR5;E5QC94;E2DFE6;E1…	ATP synthase protein 8	ATP8;atp8;ATPase 8;MT-ATP8
30.2115	30.0131	29.9638	30.3968	30.3331	30.5014	30.232	30.3772	30.2711	9	58.1	17.276	10808000000	55	A0A023T6R1;Q96A72;F5H6P7;F5H6N1;F5H3U9;F5H124	A0A023T6R1;Q96A72;F5H6P7;F5H6N1	Protein mago nashi homolog 2	FLJ10292;MAGOHB
30.583	30.8732	30.9804	31.1624	30.8588	30.9768	30.776	31.023	30.9714	5	51.1	19.889	16988000000	48	A0A023T787;Q9Y5S9;A0A0J9YW13	A0A023T787;Q9Y5S9	RNA-binding protein 8A	RBM8;RBM8A
27.6216	27.6207	27.7879	27.8951	27.7646	28.0283	28.0146	27.8183	27.9179	5	14.4	63.934	2005400000	30	B4DH88;A0A0C4DFM1;A0A024QYR3;Q92544;B4DYH6;Q6ZTK5;B4DKC1	B4DH88;A0A0C4DFM1;A0A024QYR3;Q92544;B4DYH6;Q6ZTK5;B4DKC1	Transmembrane 9 superfamily member 4	TM9SF4
28.6319	28.8342	28.9123	28.9332	29.0073	28.8124	28.9607	29.2059	29.0433	5	14	65.43	4315600000	44	B3KSG9;A0A024QYR8;Q99805	B3KSG9;A0A024QYR8;Q99805	Transmembrane 9 superfamily member 2	TM9SF2
28.7088	28.8687	28.9993	29.223	29.1655	29.0313	28.9442	28.7937	29.0725	7	34.4	29.881	4475500000	36	Q5TB53;Q96JZ5;A0A024QYS2;Q9HD45;Q8WUB5;Q8NCC4	Q5TB53;Q96JZ5;A0A024QYS2;Q9HD45;Q8WUB5	Transmembrane 9 superfamily member 3	TM9SF3;SMBP
26.1255	25.6569	25.9167	25.9872	25.6511	25.4746	25.6899	25.8485	26.0727	4	22.2	18.733	503010000	14	A0A024QYT6;H7C1E4;P61966	A0A024QYT6;H7C1E4;P61966	AP-1 complex subunit sigma-1A	AP1S1
32.3592	32.3811	32.4546	32.3792	32.3413	32.4466	32.5529	32.6855	32.5151	29	37	103.64	49744000000	262	B4DVQ5;A1KYQ7;A0A024QYU9;Q99613;B5ME19;B4DVU3;B4DDN4;B4DRU0;B4E2Z6;B3KNZ4;A0A024QYX7;Q3B7B9;H3BPE4;H3BPE3;H3BTY8	B4DVQ5;A1KYQ7;A0A024QYU9;Q99613;B5ME19;B4DVU3;B4DDN4;B4DRU0;B4E2Z6;B3KNZ4;A0A024QYX7	Eukaryotic translation initiation factor 3 subunit C;Eukaryotic translation initiation factor 3 subunit C-like protein	EIF3C;EIF3CL
27.1673	27.2628	27.0225	27.529	27.6048	27.4252	27.129	27.3259	27.1314	5	22.5	30.554	1379800000	23	A0A0U1RQR1;A0A0U1RR06;A0A024QYX1;A0A024QYW6;Q9Y484;C9J5L0;C9J7Q8;C9JUS5;C9JBX7;C9J471;H0Y329;A0A0U1RQG6;A0A0U1RQM7;C9JE01;C9J0A8;G8JLI5;C9JYH8;A0A0U1RR42;B4DVH6;A0A0U1RQS7;A0A0U1RRJ9;B4DFG8;A6NM71;A0A0U1RQJ7;H7C4N7;C9JVT3	A0A0U1RQR1;A0A0U1RR06;A0A024QYX1;A0A024QYW6;Q9Y484;C9J5L0;C9J7Q8;C9JUS5;C9JBX7;C9J471;H0Y329;A0A0U1RQG6;A0A0U1RQM7;C9JE01;C9J0A8;G8JLI5;C9JYH8	WD repeat domain phosphoinositide-interacting protein 4	WDR45
30.9278	30.7964	30.7656	30.6773	30.8958	31.0548	30.7334	31.0821	30.8087	5	54.8	17.17	16432000000	62	A0A024QYX3;P98179	A0A024QYX3;P98179	RNA-binding protein 3	RBM3
29.7785	30.028	29.9825	29.9351	29.882	30.1181	29.9127	29.9008	29.9509	12	47.4	40.883	8985700000	80	B2R7R5;A0A024QYY3;O60256;I3L0S1;E7EPA1;Q6ZTP6;I3L4G9;C9JDU5;C9JJS3;C9K0K7;I3L331;I3L164;C9JDH0;E7EW35;I3L1T1;I3L3B8;I3L2J4	B2R7R5;A0A024QYY3;O60256;I3L0S1;E7EPA1	Phosphoribosyl pyrophosphate synthase-associated protein 2	PRPSAP2
28.9083	28.7887	29.0251	29.0633	29.0699	29.4308	29.1557	29.0298	29.1113	14	24.4	85.566	4721000000	38	A0A024QYZ6;O60645;D6RB59;Q69YP2;Q6ZNJ2;H0Y995;B2RE06;D6RBR9	A0A024QYZ6;O60645;D6RB59;Q69YP2;Q6ZNJ2;H0Y995	Exocyst complex component 3	EXOC3;DKFZp762K123;FLJ00339
28.3538	28.4084	28.4352	28.4393	28.3812	28.4959	28.2338	28.2992	28.2624	15	28.6	65.186	2933700000	48	B7ZAR0;B4DPB6;A0A024QZ03;O60826;B4DLA4	B7ZAR0;B4DPB6;A0A024QZ03;O60826	Coiled-coil domain-containing protein 22	CCDC22
27.9618	27.8924	27.7396	27.8505	27.5263	28.0573	28.0484	27.9286	27.8592	4	14.2	60.625	2081300000	27	A0A024QZ09;Q96G74;H7BZQ3;A0A087WXV6	A0A024QZ09;Q96G74;H7BZQ3;A0A087WXV6	OTU domain-containing protein 5	OTUD5
24.9449	NaN	25.1157	25.2221	25.5926	25.2767	NaN	24.8135	24.9209	3	7.4	50.629	304210000	10	B4DIA5;A0A024QZ23;P19532;Q75KY0;B7Z757;C9JBI8;O14948	B4DIA5;A0A024QZ23;P19532	Transcription factor E3	TFE3
26.9322	27.095	26.7974	26.9905	27.0362	27.501	27.1631	26.7453	27.0095	6	7.2	130.4	1154600000	14	B4DZN1;Q9NSW6;A0A024QZ26;B4DZH6;Q9UBN7;B3KNA1;B3KT76;B3KVK5;Q9NZS3;B3KMC3;C9J172;Q9BRX7;E9PEH1;E7EP63;E7ER52;A6NDI8;E7EPS2;C9JEF4;H7C0Z9;B4DJ18;B3KY98	B4DZN1;Q9NSW6;A0A024QZ26;B4DZH6;Q9UBN7;B3KNA1;B3KT76;B3KVK5;Q9NZS3;B3KMC3	Histone deacetylase 6	DKFZp566E044;HDAC6
31.058	30.9364	31.0221	31.1523	31.0118	31.1974	30.8999	30.8669	31.0187	17	44.9	63.566	18269000000	118	D6RFM5;A0A024QZ30;P31040;Q0QF12;B4DYN5;B3KT34;A0A087X1I3;B3KYA5;H0Y8X1	D6RFM5;A0A024QZ30;P31040;Q0QF12;B4DYN5;B3KT34;A0A087X1I3	Succinate dehydrogenase [ubiquinone] flavoprotein subunit, mitochondrial	SDHA
NaN	25.5084	NaN	25.9053	26.0366	NaN	27.2013	27.6544	NaN	4	5.4	133.38	720240000	7	J3KMZ7;B4DQZ5;A0A024QZ48;Q9H0H0;J3KRH0	J3KMZ7;B4DQZ5;A0A024QZ48;Q9H0H0	Integrator complex subunit 2	INTS2
31.1713	31.3166	31.2337	31.4174	31.7633	31.5871	31.512	31.2647	31.3742	21	63.3	41.685	24023000000	124	Q6FG43;J3QLD9;A0A024QZ62;E7EMK3;Q14254;Q9BTI6;K7EKW9	Q6FG43;J3QLD9;A0A024QZ62;E7EMK3;Q14254;Q9BTI6;K7EKW9	Flotillin-2	FLOT2;hCG_1998851
31.0729	31.2665	31.3758	31.154	31.097	31.2312	31.3856	31.3102	31.2991	56	40	231.1	21394000000	296	A0A0D9SFK2;A0A024QZ63;Q92614;B4DYM1;B4DZ32;B4E0T8;B4DFN7;H0YEV9;B3KVF8;Q9NYE8;A0A1B0GWJ6	A0A0D9SFK2;A0A024QZ63;Q92614;B4DYM1;B4DZ32;B4E0T8	Unconventional myosin-XVIIIa	MYO18A;hCG_27198
32.3488	32.2491	32.36	32.7006	32.4567	32.6156	32.2401	32.1438	32.4386	17	66.2	39.455	59821000000	169	A0A024QZ64;P09972;B7Z1N6;B7Z1Y2;B7Z3K9;A8MVZ9;B7Z3K7;B7Z1Z9;B7Z1L5;J3KSV6;J3QKP5;K7EKH5;C9J8F3;J3QKK1;B7Z1H6	A0A024QZ64;P09972;B7Z1N6;B7Z1Y2;B7Z3K9;A8MVZ9;B7Z3K7;B7Z1Z9	Fructose-bisphosphate aldolase;Fructose-bisphosphate aldolase C	ALDOC
28.0996	28.0908	28.1561	28.1881	28.4473	28.3995	28.3559	28.0872	28.0871	10	14.4	116.07	2607800000	39	A0A024QZ70;Q7L7X3	A0A024QZ70;Q7L7X3	Serine/threonine-protein kinase TAO1	TAOK1
NaN	NaN	NaN	NaN	NaN	NaN	NaN	NaN	24.3951	2	2.4	172.6	30052000	2	Q59H82;A0A024QZ73;A0A024QZ72;Q13029;B4DU02;B4DEP3	Q59H82;A0A024QZ73;A0A024QZ72;Q13029;B4DU02;B4DEP3	PR domain zinc finger protein 2	PRDM2
28.1972	28.0265	27.8395	28.1924	28.5829	27.4658	27.393	28.1796	27.7791	7	32.1	26.697	2265800000	38	A0A024QZ77;Q96C19;H0Y4Y4;C9JTV4;Q8WYH2;Q53SA2;Q7Z2R5;B4DEE0;A0A087X1Z2;A0A024R493;Q59EU6;Q9BUP0	A0A024QZ77;Q96C19;H0Y4Y4	EF-hand domain-containing protein D2	EFHD2
28.3059	28.0523	28.2623	28.2298	27.8007	27.9836	27.9919	28.0742	28.1608	3	20.2	28.342	2423600000	25	Q53FE5;A0A024QZ81;Q9NVZ3;D6RAN6;B4DUR7;F6SKB8;D6RB24;H0Y970	Q53FE5;A0A024QZ81;Q9NVZ3;D6RAN6;B4DUR7;F6SKB8;D6RB24	Adaptin ear-binding coat-associated protein 2	NECAP2
26.6469	27.0811	NaN	27.043	26.7098	27.1379	NaN	26.9669	26.7209	5	18.7	50.011	899290000	7	A2VCL3;Q6PIW8;A0A0A0MS45;J3KNI1;A0A024QZ89;Q9H9E3;J3KRB5;H3BMV9;Q8N8L9;H3BSD2;E9PRT5;B4DDL2	A2VCL3;Q6PIW8;A0A0A0MS45;J3KNI1;A0A024QZ89;Q9H9E3;J3KRB5;H3BMV9;Q8N8L9	Conserved oligomeric Golgi complex subunit 4	COG4
NaN	NaN	NaN	NaN	NaN	26.0262	NaN	NaN	NaN	2	7.4	40.187	304500000	6	B3KXG9;B2R7K8;A0A024QZA4;Q16842	B3KXG9;B2R7K8;A0A024QZA4;Q16842	CMP-N-acetylneuraminate-beta-galactosamide-alpha-2,3-sialyltransferase 2	ST3GAL2
NaN	NaN	26.3172	NaN	NaN	NaN	NaN	NaN	NaN	3	14.6	46.36	831270000	1	A0A024QZA9;O14874;H3BTL2;H3BS02;B4DGN9;H3BNP3	A0A024QZA9;O14874;H3BTL2;H3BS02;B4DGN9	[3-methyl-2-oxobutanoate dehydrogenase [lipoamide]] kinase, mitochondrial	BCKDK
27.9464	28.0707	28.0839	28.1603	28.1637	28.0743	27.4312	27.4769	27.7009	8	34.6	34.197	2122800000	34	A0A024QZB4;H3BRY5;P50225;H3BQX5;Q59GG0;P50226;E9PKR8;E9PKW4;E9PM76	A0A024QZB4;H3BRY5;P50225;H3BQX5;Q59GG0;P50226	Sulfotransferase;Sulfotransferase 1A1;Sulfotransferase 1A2	hCG_1993905;SULT1A1;SULT1A2
26.8928	26.8669	26.9721	26.9482	27.0452	26.6225	26.9507	27.048	26.8926	4	17	37.646	1065600000	20	A0A024QZC1;O95400;A0A0S2Z5J7;Q5QTR6	A0A024QZC1;O95400;A0A0S2Z5J7	CD2 antigen cytoplasmic tail-binding protein 2	CD2BP2
24.639	NaN	24.6675	NaN	NaN	24.9509	NaN	NaN	NaN	2	5.1	50.205	149660000	5	B7Z2Y7;H3BS42;B2RD90;A0A024QZC8;Q9H5H4	B7Z2Y7;H3BS42;B2RD90;A0A024QZC8;Q9H5H4	Zinc finger protein 768	ZNF768;FLJ23436
30.5366	31.574	30.9801	31.1012	31.1894	31.0413	31.0097	31.0561	31.0676	9	31.7	18.732	19256000000	56	Q0QEW2;G3V203;H0YHA7;A0A024QZD1;J3QQ67;Q07020;F8VYV2;B4DDY5;F8VUA6	Q0QEW2;G3V203;H0YHA7;A0A024QZD1;J3QQ67;Q07020;F8VYV2;B4DDY5	60S ribosomal protein L18	RPL18
31.905	31.9848	32.1437	32.1544	31.9969	32.1445	32.0892	32.1096	32.1694	12	32.3	51.495	38092000000	136	A8KAQ5;A0A024QZD5;P08621;M0QYR1;B3KPV0	A8KAQ5;A0A024QZD5;P08621	U1 small nuclear ribonucleoprotein 70 kDa	SNRP70;SNRNP70
23.9256	24.6599	24.5631	24.6206	24.5136	24.1354	NaN	24.3742	NaN	3	8.4	67.932	184530000	4	B2RDP4;A8K1I4;A0A024QZD9;Q96K58;C9JCJ0;C9JG35	B2RDP4;A8K1I4;A0A024QZD9;Q96K58;C9JCJ0	Zinc finger protein 668	ZNF668
NaN	NaN	NaN	NaN	23.705	NaN	NaN	NaN	NaN	3	5.7	73.184	204880000	2	A0A024QZE0;Q9H7E2	A0A024QZE0;Q9H7E2	Tudor domain-containing protein 3	TDRD3
27.4005	27.7985	27.9677	NaN	27.956	28.3335	28.8281	28.4854	NaN	2	15.3	30.779	2359000000	18	M0QYT9;E2GIM7;E2GIM5;A0A024QZE1;Q14653;M0R0R8;M0R0X9;M0QXC8;E2GIM8;M0R205;E2GIM9;M0QZB8;M0QZB7;Q96GL3	M0QYT9;E2GIM7;E2GIM5;A0A024QZE1;Q14653;M0R0R8;M0R0X9;M0QXC8;E2GIM8;M0R205;E2GIM9;M0QZB8;M0QZB7;Q96GL3	Interferon regulatory factor 3	IRF3
25.4686	25.9343	NaN	25.4741	NaN	NaN	NaN	NaN	NaN	2	11.4	31.002	169910000	4	Q59GQ4;A0A024QZE8;J3KNN3;P15735;H3BTI9;H3BP07;H3BTW6	Q59GQ4;A0A024QZE8;J3KNN3;P15735;H3BTI9;H3BP07;H3BTW6	Phosphorylase b kinase gamma catalytic chain, liver/testis isoform	PHKG2
27.6203	27.7634	27.6912	27.6165	27.646	28.0187	27.7879	27.6942	27.7069	6	39.7	32.431	1868000000	30	A0A024QZE9;M0QYA2;Q9NWS0;M0QYF4;M0R3A4;M0R2P8;M0QXD5;M0R028;M0QZM3;M0QZ61;M0QZZ1;M0R0J2;M0R3A8	A0A024QZE9;M0QYA2;Q9NWS0;M0QYF4;M0R3A4;M0R2P8;M0QXD5	PIH1 domain-containing protein 1	FLJ20643;PIH1D1
29.7361	30.0264	30.2189	30.0161	30.3211	30.4442	30.396	30.0629	30.2623	6	19.3	45.615	10161000000	51	M0QXN5;A0A024QZF1;P37198	M0QXN5;A0A024QZF1;P37198	Nuclear pore glycoprotein p62	NUP62;hCG_19665
29.8149	30.1844	30.1582	30.1835	30.109	29.7703	29.946	30.1565	29.865	21	29	107.25	9123400000	138	A0A0S2Z4Z2;A8K6K1;A0A0S2Z537;A0A024QZG0;O75150;H3BP71;B4DMM1;B4DFU2;H3BS50;B3KQV1;B4DEN2;Q6ZN99;A0A087WTK2;B4E313;H3BQ99;H3BUL6;I3L332	A0A0S2Z4Z2;A8K6K1;A0A0S2Z537;A0A024QZG0;O75150;H3BP71;B4DMM1	E3 ubiquitin-protein ligase BRE1B	RNF40
27.4957	27.253	27.3621	27.4637	27.195	27.3157	27.3988	27.4335	27.5922	9	8.8	139.26	1516200000	34	A0A024QZH6;Q9H7N4	A0A024QZH6;Q9H7N4	Splicing factor, arginine/serine-rich 19	SR-A1;SCAF1
26.0316	26.2243	26.1706	26.1495	26.0447	26.3202	26.1083	26.2515	26.2276	4	14.1	52.881	632070000	11	A0A024QZI4;Q8IV63;B4DGW1;M0R073;M0QYA8;M0QXV1;M0QXD7;M0QX88;M0R025;M0R200;M0QYG0;B4E0U5	A0A024QZI4;Q8IV63;B4DGW1;M0R073;M0QYA8	Inactive serine/threonine-protein kinase VRK3	VRK3
30.0149	30.0355	30.1463	29.9839	29.8435	30.1813	30.0119	30.0844	30.07	10	36.5	53.294	9297100000	83	A0A024QZJ7;Q16204;Q05CP8;Q15302;J7M8C2;J7MDF2	A0A024QZJ7;Q16204;Q05CP8	Coiled-coil domain-containing protein 6	CCDC6
31.5724	31.7097	31.7643	31.8115	31.6863	31.7851	31.6986	31.7573	31.7165	27	31.6	102.31	29628000000	189	B4DG62;A8K7J7;A0A024QZK7;Q59FD4;B3KXY9;P19367;B3KRA9;B1AR63;B1AR62;B1AR61;B3KT70;A8K4Q9;A0A024R7R1;Q59H08;Q2TB90;P52790;B4E0J9	B4DG62;A8K7J7;A0A024QZK7;Q59FD4;B3KXY9;P19367;B3KRA9	Hexokinase;Hexokinase-1	HK1
32.7014	32.4518	32.5969	32.6374	32.8127	32.6989	32.7908	32.7005	32.7501	15	62.7	36.926	58088000000	214	A0A024QZK8;P31942;Q53F48;B4DHY1;A0A024QZP1	A0A024QZK8;P31942;Q53F48;B4DHY1;A0A024QZP1	Heterogeneous nuclear ribonucleoprotein H3	HNRPH3;HNRNPH3
24.6434	NaN	NaN	NaN	NaN	NaN	NaN	NaN	NaN	2	33	10.761	69273000	3	Q5VVH9;A0A024QZL0;Q96D05	Q5VVH9;A0A024QZL0;Q96D05	Uncharacterized protein C10orf35	C10orf35
NaN	NaN	NaN	26.2655	27.2829	NaN	NaN	NaN	NaN	3	15.2	17.624	554130000	5	A0A024QZL1;P10124	A0A024QZL1;P10124	Serglycin	PRG1;SRGN
24.464	NaN	NaN	NaN	24.9965	NaN	NaN	NaN	NaN	5	15.1	41.227	348070000	4	A0A024QZM0;B7Z518;H0YE76;B3KU20;H0YCB3;Q8N9N2;E9PM82;E9PR40;H0YER2;E9PQZ6	A0A024QZM0;B7Z518;H0YE76;B3KU20;H0YCB3;Q8N9N2	Activating signal cointegrator 1 complex subunit 1	ASCC1
26.0621	26.2928	25.9085	25.6503	NaN	25.7747	26.2059	25.7866	25.7412	4	33.3	19.533	523770000	7	X6RK58;A0A024QZM2;Q8TCA0;A0A024QZR0;A0A0A0MS58;A0A024QZL5	X6RK58;A0A024QZM2;Q8TCA0;A0A024QZR0;A0A0A0MS58	Leucine-rich repeat-containing protein 20	LRRC20
31.0948	31.0537	31.0576	31.1336	30.9131	31.0232	31.0499	30.9302	31.0941	25	35.6	118.32	18548000000	149	A0A024QZM6;P53992;B4DSN3;G5EA31;B7ZAY6;B4DQ22;A0A0U1RR49	A0A024QZM6;P53992;B4DSN3;G5EA31	Protein transport protein Sec24C	SEC24C
30.97	30.9675	31.1099	31.0802	30.9841	31.0184	31.0592	31.0537	30.8361	11	51.9	29.909	18125000000	89	A0A024QZN2;Q8WXX5;Q2VIL4	A0A024QZN2;Q8WXX5	DnaJ homolog subfamily C member 9	hCG_2024613;DNAJC9
34.7734	34.8683	34.9953	35.0168	34.8869	35.1446	34.9252	34.8879	34.9405	59	65.1	116.72	276460000000	531	A0A024QZN4;V9HWK2;P18206;B3KXA2;B4E3Q9;B4DKC9;B4DTM7;A0A096LPE1	A0A024QZN4;V9HWK2;P18206;B3KXA2;B4E3Q9	Vinculin	VCL;HEL114
26.757	26.6019	26.6846	26.5347	27.1188	26.6938	26.9204	26.6477	NaN	7	28.6	35.654	948280000	19	A0A024QZN5;A0A024QZJ1;O95229;A6NH27;B4DP12;R4GMS7	A0A024QZN5;A0A024QZJ1;O95229	ZW10 interactor	ZWINT
NaN	25.9616	26.1602	25.1145	25.8799	26.1452	25.5041	NaN	25.0822	3	5	116.13	406910000	9	A0A024QZN6;Q9ULJ6;F6WR09;D4YW76;Q149N7;A0A087WYE6;A0JLS3;B3KR25;E7EWM3;D4YW75;A0A087X127;Q8NF64	A0A024QZN6;Q9ULJ6;F6WR09;D4YW76	Zinc finger MIZ domain-containing protein 1	RAI17;ZMIZ1;TRAFIP10
30.8233	30.7735	31.0813	31.0244	31.0007	31.1501	31.0646	30.9651	31.1356	4	35.2	12.199	18267000000	51	A0A024QZN7;Q9NZ45	A0A024QZN7;Q9NZ45	CDGSH iron-sulfur domain-containing protein 1	C10orf70;CISD1
27.687	27.8373	27.8508	27.9205	28.1464	28.0251	27.6387	27.4646	27.607	10	14.1	115.2	1965400000	36	A8K9U4;A0A024QZN8;Q5GLZ8;Q9Y4U2;D6RCL5;H0Y6K7	A8K9U4;A0A024QZN8;Q5GLZ8	Probable E3 ubiquitin-protein ligase HERC4	HERC4
32.4505	32.6013	32.7236	32.6283	32.58	32.4846	32.8239	32.9907	32.788	21	75.1	34.081	57791000000	184	A0A024QZP7;P06493;Q5H9N4;A0A087WZZ9;I6L9I5;A0A024QZJ8;E5RIU6;B7Z3D6;K7ELV5;G3V317;B3KX76;K7EJ83;Q8IWB3;H0YAZ9;Q9BWF9;E7EUK8;B4DK59;B4DHU6;E5RGN0;Q96GA5;Q9BRL4;A0A087WZU2;A0A140VK97;A0A024R183;B7Z8T0;Q96Q40;O94921;Q00536	A0A024QZP7;P06493;Q5H9N4;A0A087WZZ9;I6L9I5;A0A024QZJ8;E5RIU6	Cyclin-dependent kinase 1	CDC2;CDK1;DKFZp686L20222
26.6439	26.621	26.2135	NaN	NaN	26.2572	26.4517	26.5157	26.5835	5	11.9	81.68	680460000	14	A0A024QZQ1;Q96EB6;A8K128;I1Y8W7;B0QZ35;E9PC49	A0A024QZQ1;Q96EB6;A8K128;I1Y8W7;B0QZ35;E9PC49	NAD-dependent protein deacetylase sirtuin-1;SirtT1 75 kDa fragment	SIRT1
32.9285	32.6755	33.2015	33.1563	32.9332	33.122	33.0377	32.8749	33.1462	14	31.5	58.14	72830000000	131	Q53FJ5;A0A024QZQ2;P07602;C9JIZ6;Q59EN5;B4DEK5;B4DRB7;Q5BJH1;A0A0J9YXB8	Q53FJ5;A0A024QZQ2;P07602;C9JIZ6;Q59EN5;B4DEK5;B4DRB7;Q5BJH1	Prosaposin;Saposin-A;Saposin-B-Val;Saposin-B;Saposin-C;Saposin-D	PSAP
29.2353	29.262	29.2481	29.466	29.4717	29.3623	29.3538	29.3436	29.3012	8	29.9	43.378	5686900000	49	B3KPC1;A0A024QZR3;Q9BRX2	B3KPC1;A0A024QZR3;Q9BRX2	Protein pelota homolog	hCG_2002731;PELO
29.331	29.1346	29.3968	29.2838	29.1486	29.486	29.576	29.5477	29.4255	8	38	32.976	5859200000	40	Q8NDP0;A0A024QZR5;Q9Y2T2;B4DRN6;E5RJ52;P53677;H0YBM0;H0YBA0;E7ER80	Q8NDP0;A0A024QZR5;Q9Y2T2;B4DRN6	AP-3 complex subunit mu-1	DKFZp586G1518;AP3M1
30.686	30.5416	30.7855	30.6666	30.5366	30.7421	30.9484	30.8988	30.9566	7	52.7	22.039	15263000000	57	B2R6X6;A0A024QZS4;P30405;R4GN99;H0Y548	B2R6X6;A0A024QZS4;P30405;R4GN99;H0Y548	Peptidyl-prolyl cis-trans isomerase;Peptidyl-prolyl cis-trans isomerase F, mitochondrial	PPIF
33.7221	33.6428	33.701	33.8598	33.8719	33.9105	33.8066	33.7824	33.9766	14	68.4	30.348	126660000000	156	A0A0A0MR02;A0A024QZT0;P45880;A0A024QZN9;B4DKM5;Q5JSD2;Q5JSD1;A2A3S1	A0A0A0MR02;A0A024QZT0;P45880;A0A024QZN9;B4DKM5;Q5JSD2;Q5JSD1	Voltage-dependent anion-selective channel protein 2	VDAC2
29.0629	28.8777	28.9872	29.0506	28.9817	29.1157	28.9975	28.9792	28.8552	19	27.7	104.07	4473200000	48	A0A024QZT2;Q96KP1;B3KPN7;B4DZI7;Q2MDF5	A0A024QZT2;Q96KP1;B3KPN7	Exocyst complex component 2	EXOC2
30.8845	30.7417	30.8048	31.0129	31.025	31.0356	30.7052	30.4979	30.6277	19	53.7	42.403	15904000000	118	A0A024QZT4;P50453;Q6N0A8;B2R9H3;A0A024R2B1;P50452	A0A024QZT4;P50453	Serpin B9	SERPINB9
29.2991	27.5101	29.184	27.6438	27.5245	27.5619	27.7489	27.8219	28.9603	4	37.8	21.537	2862400000	18	Q5TD07;A0A024QZT9;P16083;B3KPX6;Q5TD05;Q59EN2;A2A2U4	Q5TD07;A0A024QZT9;P16083;B3KPX6;Q5TD05;Q59EN2	Ribosyldihydronicotinamide dehydrogenase [quinone]	NQO2
28.6513	28.5894	28.8223	28.7842	28.6939	28.653	28.7834	28.5485	28.6007	10	19.4	75.93	3602000000	50	A0A024QZU0;Q13546;B3KU53	A0A024QZU0;Q13546	Receptor-interacting serine/threonine-protein kinase 1	RIPK1
30.7572	30.8069	30.8376	30.8804	30.7083	30.9469	30.9324	30.8794	30.953	12	53.6	40.193	16278000000	87	Q6IBN4;Q53HG3;Q53GC8;A0A0C4DGA2;A0A024QZU5;O75521;B4DLL3;F1LLU7;Q59E94;F8WAW4;Q9NYD2;C9JB63;F8W6J1	Q6IBN4;Q53HG3;Q53GC8;A0A0C4DGA2;A0A024QZU5;O75521;B4DLL3;F1LLU7;Q59E94	Enoyl-CoA delta isomerase 2, mitochondrial	PECI;ECI2
27.9589	28.4083	28.1463	27.9732	27.9564	28.1515	28.0079	28.3109	28.2035	10	9.9	181.42	2464900000	39	A0A024QZU8;Q92766;C9JU34;C9JE09;C9JPJ6;A0A087X055	A0A024QZU8;Q92766;C9JU34	Ras-responsive element-binding protein 1	RREB1
29.4632	29.5492	29.4128	29.4934	29.4974	29.2481	29.482	29.2317	29.3853	11	39.2	28.233	6027800000	56	Q9BS45;A0A024QZW0;P51580	Q9BS45;A0A024QZW0;P51580	Thiopurine S-methyltransferase	TPMT
28.2816	28.3513	28.3556	28.468	28.5714	28.3528	28.4009	28.3514	28.1786	4	18.7	29.426	2918000000	24	A0A024QZW2;Q9UMY1;H7C2B1	A0A024QZW2;Q9UMY1	Nucleolar protein 7	NOL7
29.8622	29.9555	29.9012	30.0255	29.95	30.1756	30.0426	30.1041	30.0855	12	30.6	77.846	9072600000	107	A0A024QZW3;Q96S59;A0A024R014;O60738	A0A024QZW3;Q96S59;A0A024R014	Ran-binding protein 9	RANBP9
30.3623	30.5456	30.4821	30.6501	30.752	30.7239	30.6751	30.6793	30.8125	25	26.6	153.97	13992000000	138	A0A024QZW7;P49790	A0A024QZW7;P49790	Nuclear pore complex protein Nup153	NUP153
NaN	NaN	NaN	NaN	NaN	25.3187	NaN	NaN	NaN	3	18.6	22.771	297460000	4	Q5SZL3;U3KPS8;Q5SZL5;Q5SZL6;Q5SZL4;A0A024R011;A0A024QZX0;Q9P0N9;Q5JPB9;Q5SZL8;Q5SZM2;U3KQD8;Q5SZM1;U3KPY5;B4DK47;U3KQQ0	Q5SZL3;U3KPS8;Q5SZL5;Q5SZL6;Q5SZL4;A0A024R011;A0A024QZX0;Q9P0N9;Q5JPB9;Q5SZL8;Q5SZM2;U3KQD8;Q5SZM1;U3KPY5;B4DK47	TBC1 domain family member 7	TBC1D7;DKFZp686N2317
32.0813	32.075	32.1234	32.3452	32.3186	32.2531	31.9841	32.0531	32.1256	18	59.3	42.621	40014000000	108	A0A024QZX3;A0A024QZX5;A0A087X1N8;P35237;Q8IXH2;A0A024QZT8	A0A024QZX3;A0A024QZX5;A0A087X1N8;P35237;Q8IXH2;A0A024QZT8	Serpin B6	SERPINB6
31.4541	31.3462	31.3617	31.1954	30.9936	31.1867	31.1882	31.0466	31.0915	8	36.2	35.348	20889000000	90	A0A024QZY1;Q13155;B2R7M3	A0A024QZY1;Q13155;B2R7M3	Aminoacyl tRNA synthase complex-interacting multifunctional protein 2	JTV1;AIMP2
25.9134	25.8052	NaN	26.5132	26.6328	26.563	25.7286	25.9108	26.0342	4	15.9	35.987	601440000	16	Q6MZQ5;A0A024QZY4;O00635;Q59EA5	Q6MZQ5;A0A024QZY4;O00635;Q59EA5	E3 ubiquitin-protein ligase TRIM38	DKFZp686F23130;TRIM38
30.9203	30.8543	31.0073	31.0813	30.9231	31.1661	31.1303	31.1367	31.2573	19	23.1	116.99	18724000000	119	A0A024QZY5;Q13523;B4DZQ5;H0YDJ3;D3DWH5;Q15456	A0A024QZY5;Q13523;B4DZQ5;H0YDJ3	Serine/threonine-protein kinase PRP4 homolog	PRPF4B
28.5207	28.1512	28.3703	28.3663	28.3168	28.2527	28.7287	28.7369	28.4377	5	44.7	20.539	3072500000	32	E2QRF9;Q53GD9;A0A024QZY7;O75496;H7C608;C9K0U5	E2QRF9;Q53GD9;A0A024QZY7;O75496;H7C608	Geminin	GMNN
NaN	NaN	NaN	NaN	NaN	NaN	NaN	NaN	26.4427	3	26.3	19.056	186240000	3	B8ZZ99;A0A024QZZ6;F8WCZ3;Q96NT0	B8ZZ99;A0A024QZZ6;F8WCZ3;Q96NT0	Coiled-coil domain-containing protein 115	CCDC115;MGC12981
34.8379	36.0454	35.5969	35.6436	36.6391	35.8849	35.4966	35.943	36.0367	9	52.4	13.834	522910000000	180	Q0D2M2;B2R4S9;A0A024RCL8;A0A024RCJ9;A0A024QZZ7;I6L9F7;U3KQK0;B4DR52;Q99879;Q99877;Q93079;Q5QNW6;P62807;P58876;P57053;O60814;Q99880;A8K9J7;L0R4T3	Q0D2M2;B2R4S9;A0A024RCL8;A0A024RCJ9;A0A024QZZ7;I6L9F7;U3KQK0;B4DR52;Q99879;Q99877;Q93079;Q5QNW6;P62807;P58876;P57053;O60814;Q99880;A8K9J7	Histone H2B;Histone H2B type 1-M;Histone H2B type 1-N;Histone H2B type 1-H;Histone H2B type 2-F;Histone H2B type 1-C/E/F/G/I;Histone H2B type 1-D;Histone H2B type F-S;Histone H2B type 1-K;Histone H2B type 1-L	HIST1H2BC;HIST1H2BI;HIST1H2BK;HIST1H2BN;HIST1H2BD;HIST1H2BM;HIST1H2BH;HIST2H2BF;H2BFS;HIST1H2BL
NaN	NaN	NaN	NaN	NaN	NaN	NaN	NaN	25.5035	3	13.1	44.123	176490000	3	A0A024R006;Q9UBU6	A0A024R006;Q9UBU6	Protein FAM8A1	FAM8A1
26.3111	25.1558	26.2121	26.12	25.5434	26.2291	26.1597	25.8187	26.2818	5	19.7	33.881	573460000	25	A0A024R012;Q9NXA8	A0A024R012;Q9NXA8	NAD-dependent protein deacylase sirtuin-5, mitochondrial	SIRT5
26.1318	25.9027	26.3122	26.3486	26.1579	NaN	26.3911	26.091	26.4521	3	20	26.173	642810000	6	A0A024R015;A0A0S2Z5U8;Q96EV8;D6RCT8;D6RID1;A0A087WYP9;A6NFV8;D6RAX1;D6RB80	A0A024R015;A0A0S2Z5U8;Q96EV8;D6RCT8;D6RID1;A0A087WYP9;A6NFV8	Dysbindin	DTNBP1
36.0451	36.2341	36.3849	36.316	36.5686	36.6326	36.5603	36.735	36.8011	10	64.1	13.906	827090000000	505	A3KPC7;A0A024RAS2;Q08AJ9;A4FTV9;A0A024R017;A0A0U1RR32;A0A0U1RRH7;Q99878;Q96KK5;Q9BTM1;Q93077;Q7L7L0;P20671;P0C0S8;P04908;B2R5B3;B2R5B6;P16104;H0YFX9;B4E0B3;V9GZN0;Q96QV6	A3KPC7;A0A024RAS2;Q08AJ9;A4FTV9;A0A024R017;A0A0U1RR32;A0A0U1RRH7;Q99878;Q96KK5;Q9BTM1;Q93077;Q7L7L0;P20671;P0C0S8;P04908;B2R5B3;B2R5B6;P16104;H0YFX9;B4E0B3	Histone H2A;Histone H2A type 1-J;Histone H2A type 1-H;Histone H2A.J;Histone H2A type 1-C;Histone H2A type 3;Histone H2A type 1-D;Histone H2A type 1;Histone H2A type 1-B/E;Histone H2AX	HIST1H2AH;H2AFJ;HIST1H2AB;HIST1H2AK;HIST1H2AC;HIST1H2AJ;HIST3H2A;HIST1H2AD;HIST1H2AG;H2AFX
27.7266	27.494	27.386	27.8556	27.9578	28.0164	27.7255	27.8516	27.7188	7	31.6	31.079	1910000000	28	A0A024R029;Q9ULW3	A0A024R029;Q9ULW3	Activator of basal transcription 1	ABT1
24.9285	NaN	25.5346	NaN	NaN	NaN	NaN	NaN	NaN	3	6.4	81.359	330260000	6	Q05DE9;A0A024R032;O15117;D6RFJ5;D6RER7	Q05DE9;A0A024R032;O15117;D6RFJ5	FYN-binding protein	FYB
27.08	26.9525	27.1275	27.5058	27.3647	27.439	27.1368	27.0612	26.8032	6	11.6	82.469	1266900000	18	B2RAW0;A0A024R036;P98082;B4DNN1;D6REB1;D6RIA5;D6RFF7	B2RAW0;A0A024R036;P98082	Disabled homolog 2	DAB2
28.8631	28.797	28.4974	28.838	28.7976	28.6863	28.5929	28.5988	28.4706	8	26.5	56.191	3613300000	45	Q6IAV5;A0A024R040;P55809;A1E286;E9PDW2;B7Z609	Q6IAV5;A0A024R040;P55809	Succinyl-CoA:3-ketoacid-coenzyme A transferase;Succinyl-CoA:3-ketoacid coenzyme A transferase 1, mitochondrial	OXCT;OXCT1
25.5744	25.9907	25.9653	26.3014	26.205	26.0946	NaN	26.1843	26.3249	3	16.7	31.827	587830000	10	A0A024R045;O60671;D6R9A1	A0A024R045;O60671	Cell cycle checkpoint protein RAD1	hCG_37731;RAD1
28.325	29.1973	29.1302	29.2488	29.4939	29.8054	29.2645	29.3665	29.2319	5	37.1	37.301	5487900000	25	B2R6K4;A0A024R056;P62873;F6UT28;B1AKQ8;F6X3N5;Q71UM6;B3KVK2;Q71UM7	B2R6K4;A0A024R056;P62873;F6UT28;B1AKQ8;F6X3N5;Q71UM6;B3KVK2	Guanine nucleotide-binding protein G(I)/G(S)/G(T) subunit beta-1	GNB1
24.5884	24.5057	NaN	NaN	NaN	NaN	NaN	NaN	24.5272	2	7	49.251	118950000	4	A8K6D4;A0A024R058;O95544;J3KSP9;A0A0A0MR98;A8K6R3	A8K6D4;A0A024R058;O95544;J3KSP9;A0A0A0MR98;A8K6R3	NAD kinase	NADK
31.8675	31.3754	31.836	32.217	32.0931	32.1982	31.2005	31.2607	31.2052	16	44	56.238	29976000000	141	Q8N995;A0A024R059;Q01581;D6RIW1;A0A140VJL2;P54868	Q8N995;A0A024R059;Q01581	Hydroxymethylglutaryl-CoA synthase, cytoplasmic	HMGCS1
27.4102	27.049	27.2477	27.2377	26.7273	26.9615	26.95	26.8129	26.7846	5	36.6	17.379	1141800000	11	B4DE96;B4DIH9;A0A024R061;P51809;B2R6P4;A0A024R074;B4DMB4	B4DE96;B4DIH9;A0A024R061;P51809;B2R6P4;A0A024R074	Vesicle-associated membrane protein 7	SYBL1;VAMP7
31.0899	31.0356	31.1683	31.157	31.0771	31.1675	31.2382	31.0911	31.174	28	29.2	148.09	19750000000	171	E9PF10;A0A024R071;O75694;B4DLT2;B3KMK3;D6RA13	E9PF10;A0A024R071;O75694;B4DLT2	Nuclear pore complex protein Nup155	NUP155
26.9875	27.4651	27.4812	27.2632	27.5008	27.6371	27.68	27.7946	27.7629	6	15.2	56.012	1621500000	25	A0A024R073;A0A024R0F2;Q5TA45;J3QRY6;Q96HV7;C9IYS7;A0A087WYI0;C9J979;E9PMA2;E9PJG0;E9PKA4;E9PNS4;A0A087WXT8	A0A024R073;A0A024R0F2;Q5TA45;J3QRY6;Q96HV7;C9IYS7;A0A087WYI0;C9J979	Integrator complex subunit 11	CPSF3L
28.8309	28.9189	28.9786	28.6878	28.4842	28.6865	29.0399	29.2695	28.9172	5	18.2	41.806	4169400000	45	A0A024R084;Q9BRK5;H0Y3T6;G3V1E2;A0A024R0A9	A0A024R084;Q9BRK5;H0Y3T6;G3V1E2;A0A024R0A9	45 kDa calcium-binding protein	SDF4
NaN	NaN	NaN	NaN	NaN	NaN	NaN	NaN	25.1175	2	17.7	14.685	292030000	2	D6RFI6;D6RAT8;D6RBK1;D6RJH2;D6R9I2;B3KQ42;A0A024R087;P52739	D6RFI6;D6RAT8;D6RBK1;D6RJH2;D6R9I2;B3KQ42;A0A024R087;P52739	Zinc finger protein 131	ZNF131;hCG_36935
28.6612	28.8792	29.0173	29.1184	28.7773	28.9595	28.9564	29.1046	29.0023	5	15	35.014	4333000000	36	A0A024R094;D6RJ02;D6RJF2;D6RD97	A0A024R094;D6RJ02;D6RJF2		PAIP1
26.2519	26.2362	26.5348	26.4708	26.5234	26.3433	26.3167	26.3959	NaN	7	8.8	98.401	664530000	11	H0Y360;B2RB47;A0A024R098;Q01433;E9PJF6;H0YCL9;E9PIJ1	H0Y360;B2RB47;A0A024R098;Q01433	AMP deaminase 2	AMPD2
28.213	28.1488	28.4046	28.499	28.3876	28.3741	28.0864	28.1217	27.9904	9	19.6	58.951	2667200000	34	A0A024R0A8;O43865;Q2NKW8;V5YQL4;Q9BTL0;O43210;Q6ZMM9;H0Y8B3;Q6ZNS6;Q6ZMI1	A0A024R0A8;O43865;Q2NKW8;V5YQL4	Adenosylhomocysteinase;Putative adenosylhomocysteinase 2	AHCYL1;FGFR2-AHCYL1
26.8195	26.9522	26.7294	26.9795	26.896	27.1496	27.2535	26.9527	26.9427	3	13.2	31.293	1100300000	14	A0A0C4DGS9;B3KN25;A0A024R0C0;Q9Y6K0	A0A0C4DGS9;B3KN25;A0A024R0C0;Q9Y6K0	Choline/ethanolaminephosphotransferase 1	CEPT1
31.3672	31.4506	31.5433	31.576	31.6259	31.6569	31.5494	31.3741	31.459	24	32.9	113.88	25718000000	149	Q2TB59;A0A024R0C3;Q13423;E9PCX7;D6RAI5;D6RHU2;Q8N5H5;B4DS88;B4DMN9;D6RCR6;H0Y8P5	Q2TB59;A0A024R0C3;Q13423;E9PCX7	NAD(P) transhydrogenase, mitochondrial	NNT
31.6287	31.7467	31.6659	31.3177	31.4876	31.5927	31.7805	32.0035	31.8626	24	34.3	88.884	29058000000	178	A0A024R0E2;O75534;Q9GZV0;A0A024R0K2;Q96L66;E9PLT0;Q9UG93;Q8WU01;E9PNG3;Q9UG12;E9PLD4;E9PJK7	A0A024R0E2;O75534;Q9GZV0;A0A024R0K2;Q96L66;E9PLT0	Cold shock domain-containing protein E1	CSDE1;UNR
32.4219	32.7301	32.4878	32.4533	32.5064	32.4837	32.2506	32.3952	32.3406	15	72.4	32.922	49503000000	158	A0A024R0E5;P52907;A8K0T9	A0A024R0E5;P52907;A8K0T9	F-actin-capping protein subunit alpha-1	CAPZA1
27.4465	27.7079	27.742	27.9092	27.9813	28.1721	28.0278	27.8616	27.959	11	15	129.59	2059500000	48	A0A024R0F1;Q9UNY4	A0A024R0F1;Q9UNY4	Transcription termination factor 2	TTF2
29.7839	29.5941	29.9307	29.533	29.4643	29.6904	29.9773	30.0515	29.9001	17	17.5	122.52	7781100000	85	A0A024R0F6;Q9UPN9;H0Y612;B3KN30;B4DXI9	A0A024R0F6;Q9UPN9;H0Y612;B3KN30	E3 ubiquitin-protein ligase TRIM33	TRIM33
27.9553	27.5953	27.5509	27.6488	27.5422	28.0881	27.4842	27.7954	27.9367	7	21.8	62.022	1884800000	27	A0A024R0G0;Q96S66;A0A024R095;Q5T1P5;B3KQX4	A0A024R0G0;Q96S66;A0A024R095	Chloride channel CLIC-like protein 1	CLCC1
27.1862	27.7351	27.1014	27.279	27.2983	27.1491	27.1768	27.3625	27.8181	5	39.1	19.467	1458700000	14	B5MCS1;A0A0A0MRF5;E7EWX6;A0A024R0G8;A7VJH3;A0A087WYM3;Q8IXJ6;C9JZQ0;F8WCF4;F8WF57;F8WDM4;C9JR33;C9J3U7	B5MCS1;A0A0A0MRF5;E7EWX6;A0A024R0G8;A7VJH3;A0A087WYM3;Q8IXJ6;C9JZQ0;F8WCF4	NAD-dependent protein deacetylase sirtuin-2	SIRT2;SIR2
NaN	30.3062	25.415	24.1537	30.2995	NaN	24.0581	NaN	NaN	4	8.8	51.878	2438300000	16	B4E106;B4DKS0;A0A024R0H1;P53985;Q5T8R3;Q5T8R5;B2R6A5;Q5T8R4	B4E106;B4DKS0;A0A024R0H1;P53985;Q5T8R3;Q5T8R5;B2R6A5	Monocarboxylate transporter 1	SLC16A1
NaN	25.6217	25.8535	25.7049	NaN	26.0465	NaN	NaN	26.2296	2	8.7	15.173	357250000	9	A0A024R0H2;O15235	A0A024R0H2;O15235	28S ribosomal protein S12, mitochondrial	MRPS12
28.0919	28.0652	28.0885	28.2359	28.084	28.1151	28.1931	28.1348	27.955	11	21.7	59.975	2424200000	48	A0A024R0H6;Q8N7H5;B4DGJ5;M0QYC7	A0A024R0H6;Q8N7H5	RNA polymerase II-associated factor 1 homolog	PAF1
30.3116	30.5533	30.606	30.4419	30.3346	30.2627	30.4599	30.4998	30.4627	7	26.6	36.724	12223000000	59	A0A024R0H7;Q9BQA1;H0Y711;B4DJP0	A0A024R0H7;Q9BQA1;H0Y711	Methylosome protein 50	WDR77
31.2058	31.1175	31.4656	31.2508	31.1436	31.3168	31.4961	31.461	31.574	6	38.3	21.523	22904000000	58	Q5JR08;A0A024R0I3;P08134;E9PQH6;Q5JR07;Q5JR05;E9PLA2;Q5JR06;E9PN11;U3KQA9;U3KQV3;P62745	Q5JR08;A0A024R0I3;P08134;E9PQH6;Q5JR07;Q5JR05	Rho-related GTP-binding protein RhoC	RHOC;hCG_2043376
27.3011	26.7032	27.2843	27.0668	26.5333	26.6479	26.0786	26.4851	26.4807	10	26.2	64.071	971160000	34	A0A024R0J1;O96013;A8K724;A0A024R0L8;M0R2X4;M0R3G6;M0R0L9;B4DE88;B4E3B5;M0R1R1;B4DUG0	A0A024R0J1;O96013;A8K724;A0A024R0L8;M0R2X4	Non-specific serine/threonine protein kinase;Serine/threonine-protein kinase PAK 4	PAK4
NaN	NaN	NaN	NaN	NaN	25.6003	NaN	NaN	NaN	3	28.1	21.21	277940000	5	M0R0X1;A0A024R0K8;A0A024R0J7;P61018;Q6PIK3	M0R0X1;A0A024R0K8;A0A024R0J7;P61018	Ras-related protein Rab-4B	RAB4B
31.208	30.9404	31.2184	31.1208	30.8984	31.2007	31.1333	30.9403	31.2441	21	25.9	84.793	19346000000	142	A0A024R0J9;A0A0A0MRA5;B7Z4B8;A8K6U7;Q9BUJ2;A8K3W4;A8K5K0;M0R3F1;M0QYZ0;M0R203;M0QZV6;M0R0K8;M0QYI8;B3KM60;M0QYM5	A0A024R0J9;A0A0A0MRA5;B7Z4B8;A8K6U7;Q9BUJ2;A8K3W4;A8K5K0;M0R3F1;M0QYZ0	Heterogeneous nuclear ribonucleoprotein U-like protein 1	HNRPUL1;HNRNPUL1
25.3368	25.6516	25.9394	25.6407	26.1839	25.8094	NaN	NaN	26.0939	2	9.5	50.399	435710000	8	Q59EI3;B2R8A9;A0A024R0K3;Q6ZSA3;F5H5P2;P12694;Q9UMB3;H0YH31;F5GXU9;Q658P7	Q59EI3;B2R8A9;A0A024R0K3;Q6ZSA3;F5H5P2;P12694;Q9UMB3;H0YH31;F5GXU9;Q658P7	2-oxoisovalerate dehydrogenase subunit alpha, mitochondrial	BCKDHA;DKFZp313C0640
25.1113	25.1421	NaN	25.0704	NaN	25.0646	25.126	25.0353	25.1598	4	13.6	44.753	287280000	9	A0A024R0L2;Q96F63;M0QXS4	A0A024R0L2;Q96F63	Coiled-coil domain-containing protein 97	MGC20255;CCDC97
NaN	24.907	NaN	NaN	NaN	NaN	NaN	NaN	NaN	2	5.9	57.436	121660000	9	B7Z6N1;A0A024R0L4;P50548	B7Z6N1;A0A024R0L4;P50548	ETS domain-containing transcription factor ERF	ERF
28.0172	28.4402	28.3579	28.3016	28.4622	28.5466	28.6263	28.7453	28.7853	8	27.3	43.486	3181900000	36	Q68D16;A8MT37;A0A024R0L5;P49840;M0QYV0	Q68D16;A8MT37;A0A024R0L5;P49840	Glycogen synthase kinase-3 alpha	DKFZp686D0638;GSK3A
32.1357	31.9484	32.3638	32.0078	31.7478	31.9878	32.2056	32.0825	32.1984	10	64.1	25.734	38249000000	139	A0A024R0L6;Q15102;M0QZT2;M0QXS6;M0R323;M0R1K3	A0A024R0L6;Q15102;M0QZT2	Platelet-activating factor acetylhydrolase IB subunit gamma	PAFAH1B3
29.9535	29.5324	29.5061	29.7294	29.6141	29.7346	29.7583	29.6023	29.5156	9	25.9	50.478	7306600000	51	Q0VAB1;A0A024R0M6;Q3ZCQ8;M0R0C3;M0R2F8;M0R003;M0R1Y4;M0QXC3;M0R2D2;M0R2Q2;M0R047	Q0VAB1;A0A024R0M6;Q3ZCQ8;M0R0C3;M0R2F8	Mitochondrial import inner membrane translocase subunit TIM50	TIMM50
NaN	NaN	NaN	NaN	NaN	NaN	NaN	25.0953	NaN	2	4.8	75.207	287320000	4	A0A024R0N8;Q96DU7	A0A024R0N8;Q96DU7	Inositol-trisphosphate 3-kinase C	ITPKC
27.5532	27.5589	27.664	27.8184	28.0551	28.25	27.6188	27.4088	27.8557	8	21	44.341	1917000000	50	A0A024R0P8;P01137;Q7Z488;Q49IL8;Q49IK8;B2C8Z3;A0A078BCH8;A0A078BC11;A0A078BBI5;Q671V1;Q671U8;A0A078BCJ0;M0R2S0;A0A078BFK3;Q59EG9;B2R7T2;P61812;Q7Z487;Q86YU2	A0A024R0P8;P01137;Q7Z488;Q49IL8;Q49IK8;B2C8Z3;A0A078BCH8;A0A078BC11;A0A078BBI5	Transforming growth factor beta-1;Latency-associated peptide	TGFB1
27.2225	27.0798	26.8582	27.0827	26.8748	26.9791	26.9518	27.1613	27.0549	10	34.6	57.65	1157100000	42	A0A024R0Q0;Q9H0W8;M0QZC7;M0QYR7;M0R2N0;M0QZH1;M0QX70;M0R0U0	A0A024R0Q0;Q9H0W8;M0QZC7;M0QYR7;M0R2N0	Protein SMG9	FLJ12886;SMG9
27.75	28.2757	28.279	28.6108	28.6707	28.7337	28.6118	28.4768	28.2897	4	10.8	54.705	3023600000	23	A0A024R0Q4;Q8IV08;B4DEL6;M0R1F7	A0A024R0Q4;Q8IV08;B4DEL6	Phospholipase D3	PLD3
30.6779	30.6487	30.6327	30.7069	30.5656	30.506	30.6297	30.4972	30.6818	18	48.1	56.878	13785000000	129	A0A024R0Q7;P53041;Q53FR0;B4DLP6;H0YDU8;B2R6R6;B4DDZ8;A8MU39;Q59F46;B7Z1I1	A0A024R0Q7;P53041;Q53FR0;B4DLP6;H0YDU8;B2R6R6;B4DDZ8;A8MU39	Serine/threonine-protein phosphatase;Serine/threonine-protein phosphatase 5	PPP5C
30.4852	30.6911	30.7728	30.6529	30.6111	30.7417	30.5061	30.5431	30.531	24	33.6	102.43	13797000000	115	A0A024R0R1;M0QZR4;Q92888;M0QYC1;M0R2C7;Q8NF33;Q49AN3;M0QYS3;M0R3H5;M0QZH8;M0QXV6	A0A024R0R1;M0QZR4;Q92888;M0QYC1	Rho guanine nucleotide exchange factor 1	ARHGEF1
30.7781	30.6172	30.8636	30.8351	30.9285	30.9993	30.9218	30.8794	30.9364	14	53.2	38.449	16362000000	93	A0A024R0R4;Q9UBE0;M0QZS6;B3KNJ4;M0QX65;M0QYM8;M0R054;B4DY66;M0R375;M0R286	A0A024R0R4;Q9UBE0;M0QZS6;B3KNJ4;M0QX65	SUMO-activating enzyme subunit 1;SUMO-activating enzyme subunit 1, N-terminally processed	SAE1
29.827	29.93	30.0904	30.0614	30.0013	30.1106	30.0115	30.0312	29.9771	20	25	141.13	9046400000	95	B7Z6F7;A0A024R0R6;Q92797;A0A087WUE9;Q4LE61;M0R3C7;M0R033;M0R1C2;O75402;M0R180;M0QXP5	B7Z6F7;A0A024R0R6;Q92797;A0A087WUE9;Q4LE61;M0R3C7	Symplekin	SYMPK;SYMPK variant protein
31.0784	31.1833	31.2413	31.3264	31.3422	31.5565	31.5249	31.4287	31.5456	22	82.7	33.232	23295000000	161	A0A024R0R9;P54920;M0R0Y2;M0R2M1;M0R058;M0R0I4;A0A024R0V6;M0R027;M0R213;B4DGP9;B4DIV0;A0A087WZQ7;Q9H115;M0QZM9;M0QZN5;M0R031	A0A024R0R9;P54920;M0R0Y2;M0R2M1;M0R058	Alpha-soluble NSF attachment protein	NAPA
28.5796	28.9341	28.6972	29.1462	29.2373	29.1064	28.6667	28.9283	28.7864	10	36.1	61.161	4264600000	42	A0A024R0S6;Q9NZN4;B4DLA1;Q8NCJ3;B3KUH4;B7ZAY3;B4DU62;B4DE23	A0A024R0S6;Q9NZN4;B4DLA1;Q8NCJ3;B3KUH4	EH domain-containing protein 2	EHD2
28.5101	28.5707	28.3382	28.6372	28.6581	28.8195	28.6327	28.837	28.9091	10	25	69.525	3566300000	59	A0A024R0S8;Q59HH7;P18887;F5H8D7;B2RCY5;B4DEB2;B4DTD3;M0QYS5;M0R0D2;M0R1U8;M0QZ96	A0A024R0S8;Q59HH7;P18887;F5H8D7;B2RCY5;B4DEB2;B4DTD3	DNA repair protein XRCC1	XRCC1
29.9212	29.1121	29.7193	29.7092	29.2766	29.4712	29.6631	29.2056	29.7925	7	50.2	24.843	6631700000	59	A0A0U5BLD0;A0A024R0T1;Q6UWP2;A0A087WZN3;A0A087WYV4	A0A0U5BLD0;A0A024R0T1;Q6UWP2;A0A087WZN3	Dehydrogenase/reductase SDR family member 11	MGC4172;DHRS11
31.4729	31.7089	31.697	31.9028	31.963	32.082	31.7641	31.6328	31.657	16	47.1	35.299	30617000000	176	A0A0S2Z4I9;A0A0S2Z4N8;A0A024R0V4;P50552;A0A0S2Z4I7;K7EM16;K7ENL7;A0A0S2Z4H6;K7ENR7	A0A0S2Z4I9;A0A0S2Z4N8;A0A024R0V4;P50552;A0A0S2Z4I7	Vasodilator-stimulated phosphoprotein	VASP
27.9164	28.0293	28.0607	28.0095	27.949	28.0588	28.2824	28.0847	28.0785	12	13.6	147.2	2350000000	37	A0A024R0V9;A0A1B0GV47;Q7Z4S6;H0YHT2;H0YIM6;H0YIM7;H0YHG9;Q68D13;H0YI78	A0A024R0V9;A0A1B0GV47;Q7Z4S6;H0YHT2	Kinesin-like protein;Kinesin-like protein KIF21A	KIF21A
26.9544	26.955	27.2128	28.3904	28.1331	28.0897	28.382	28.0651	27.6069	2	25	10.027	2017300000	21	F8VUY8;A0A024R0W3;Q96QD8;A8K6H9	F8VUY8;A0A024R0W3;Q96QD8;A8K6H9	Sodium-coupled neutral amino acid transporter 2	SLC38A2
24.7684	NaN	25.1078	24.9382	NaN	25.2527	25.078	25.1382	25.0631	3	3.7	140.64	272960000	4	A0A024R0X0;Q9UMZ2;A0A087WW94;A8MYE0	A0A024R0X0;Q9UMZ2	Synergin gamma	AP1GBP1;SYNRG
28.6125	28.4163	28.4958	28.4902	28.3292	28.3344	28.3447	28.1597	28.3422	12	30.3	79.236	2950100000	56	A0A0S2Z4A1;A0A024R0Y5;P08237;B4E162;Q96I60;A0A0S2Z4I1;Q7KYX9;A0A0S2Z4A8;F8VP00;Q7Z683;P78457;H0YHB8;F8W1J8;F8VSF7;F8VW30;F8VSL1;F8VUB8;F8VYK8;F8VTQ3;F8VZI0;F8VX13;F8VNX2;F8VZQ1;F8VVE3	A0A0S2Z4A1;A0A024R0Y5;P08237;B4E162;Q96I60;A0A0S2Z4I1;Q7KYX9;A0A0S2Z4A8	ATP-dependent 6-phosphofructokinase;ATP-dependent 6-phosphofructokinase, muscle type	PFKM
30.8945	30.9916	30.98	30.9038	30.9736	30.9244	31.0042	31.0089	31.0174	25	38.9	93.233	17775000000	116	B3KY11;A0A024R0Z3;Q9BUQ8;A8KA56;H0YI52;F8VVA2	B3KY11;A0A024R0Z3;Q9BUQ8;A8KA56	Probable ATP-dependent RNA helicase DDX23	DDX23
24.6252	NaN	NaN	NaN	NaN	24.893	24.5437	24.3	24.5695	2	93.8	1.9854	187270000	5	F8W1G3;F8VQW0;F8VX73;F8VPI1;F8W201;F8W086;F8VR05;B7Z984;F8VQQ5;F8VSI7;F8VVJ4;B7Z5Y9;B3KWE3;A0A024R0Z5;P55061;A0A0G2JKZ4;F8VY06	F8W1G3;F8VQW0;F8VX73;F8VPI1;F8W201;F8W086;F8VR05;B7Z984;F8VQQ5;F8VSI7;F8VVJ4;B7Z5Y9;B3KWE3;A0A024R0Z5;P55061;A0A0G2JKZ4;F8VY06	Bax inhibitor 1	TMBIM6;TEGT
NaN	NaN	NaN	NaN	NaN	25.5042	NaN	NaN	NaN	2	10.3	59.544	193350000	5	A0A024R101;Q86XZ4;F8VS10	A0A024R101;Q86XZ4;F8VS10	Spermatogenesis-associated serine-rich protein 2	SPATS2
28.8546	28.7389	28.7517	28.748	28.7376	28.7175	28.8449	28.7517	28.7332	10	26.6	70.961	3834400000	40	A0A024R102;Q96GM5;A0A024R137;A8K9I5;F8VRQ4;B4DF50;F8VZ70;F8VUB0;F8VW95;B7ZA58;B7Z4U8;H0YHV1	A0A024R102;Q96GM5;A0A024R137;A8K9I5;F8VRQ4	SWI/SNF-related matrix-associated actin-dependent regulator of chromatin subfamily D member 1	SMARCD1
28.7388	28.9002	28.9141	29.1235	28.9975	29.1942	29.0211	28.5303	29.0951	4	27.5	28.188	4363600000	37	H0YI09;A0A024R118;Q9H8H3;B4DDW1;F8VQX6	H0YI09;A0A024R118;Q9H8H3;B4DDW1;F8VQX6	Methyltransferase-like protein 7A	METTL7A
26.2772	27.688	27.6618	27.5846	27.2889	27.0442	25.9004	26.7584	26.8731	5	19.5	57.255	1205000000	25	A0A024R120;Q12800;F8VX55;F8VWL0;Q5JV87;Q9NZI6	A0A024R120;Q12800;F8VX55;F8VWL0	Alpha-globin transcription factor CP2	TFCP2
27.1621	27.8177	28.1075	28.2546	28.0335	27.7934	27.4375	27.4264	27.3753	6	27.9	31.905	1888500000	21	F8VYY9;A0A024R125;P54619;H0YHF8;H0YIC9;F8VPF5;F8VVA3;F8VZX1;B7Z6X8;E9PGP6;A0A090N8Q6;Q9UGJ0	F8VYY9;A0A024R125;P54619;H0YHF8;H0YIC9	5-AMP-activated protein kinase subunit gamma-1	PRKAG1
NaN	24.5726	24.7594	24.6984	24.3898	24.1139	24.009	NaN	NaN	2	11.3	16.161	174940000	7	F8VVA0;F8VQD9;A0A024R128;Q9BSB4	F8VVA0;F8VQD9;A0A024R128;Q9BSB4	Autophagy-related protein 101	ATG101;C12orf44
27.6046	27.4467	27.4495	27.5101	27.3958	27.3934	27.864	27.6796	27.7396	6	11.6	70.968	1680000000	45	B2RE34;A0A024R136;Q9H0H5;F8VRD2;F8VWX0;F8W0L1;F8VZ66;F8VV47;F8VWY4;F8VVE5;F8VYH6;F8VUW9;F8VV39;F8VQZ5;F8VS54;F8VV37;F8W1E5;Q9BZ74;F8VVY0;F8VXH1;F8VQF5;F8W1T4;Q9H9L9;H0YIK5	B2RE34;A0A024R136;Q9H0H5;F8VRD2;F8VWX0;F8W0L1;F8VZ66;F8VV47;F8VWY4;F8VVE5	Rac GTPase-activating protein 1	RACGAP1
31.3368	31.3497	31.4132	31.4605	31.4884	31.4451	31.5447	31.6217	31.3703	33	32.4	135.6	24602000000	182	B3KMB1;A0A024R158;O95347;B7ZLZ7;A8K984;Q2KQ72;Q05BV1;B3KM27;Q6IPS5;A0A0C4DGE5;A0JLM9;Q6P712;Q05D74;Q32Q15;Q7Z2X1;Q5T821	B3KMB1;A0A024R158;O95347;B7ZLZ7;A8K984;Q2KQ72;Q05BV1	Structural maintenance of chromosomes protein;Structural maintenance of chromosomes protein 2	SMC2L1;SMC2
31.6817	31.7918	31.7687	31.5091	31.6672	31.7794	31.9985	32.015	32.0745	14	42.1	55.306	31753000000	150	A8K8S6;A0A024R162;Q9BXL5	A8K8S6;A0A024R162;Q9BXL5	Hemogen	HEMGN
30.1284	30.3106	30.4187	30.5319	30.6176	30.8114	30.6043	30.4869	30.6288	9	29.2	59.689	12822000000	80	A0A024R163;O95758;X6R242;B1ALY4	A0A024R163;O95758	Polypyrimidine tract-binding protein 3	ROD1;PTBP3
28.028	27.611	27.9677	27.8942	27.5386	27.7863	27.9255	27.7746	27.8395	10	13.7	105.67	2008800000	40	A0A024R169;Q9NXF1;B7Z9D5;B4DQR0;A0A0A0MSR3;B4E149	A0A024R169;Q9NXF1;B7Z9D5;B4DQR0	Testis-expressed sequence 10 protein	TEX10
NaN	NaN	NaN	25.4946	NaN	NaN	NaN	NaN	NaN	3	7.4	67.585	274060000	10	A0A024R178;Q96II5;P10398;A0A0S2Z3F2;Q59HC8;B4DMG5;B4DV85	A0A024R178;Q96II5;P10398;A0A0S2Z3F2;Q59HC8;B4DMG5;B4DV85	Serine/threonine-protein kinase A-Raf	ARAF
30.2879	30.2791	30.2724	30.3344	30.3713	30.1219	30.5797	30.6046	30.5395	12	22.8	91.838	11825000000	82	A0A024R179;Q09161;F2Z2T1;X6R941	A0A024R179;Q09161	Nuclear cap-binding protein subunit 1	NCBP1
33.3457	33.3326	33.4058	33.4733	33.2494	33.5091	33.4373	33.365	33.4029	38	50.2	117.85	94463000000	276	A0A024R1A3;P22314;B4DDE4;B4DL67;Q5JRR6;B3KUJ2;Q5JRR9;Q5JRS0;Q5JRS1;Q5JRS3;Q5JRS2;Q8WY81;Q712V1	A0A024R1A3;P22314;B4DDE4;B4DL67	Ubiquitin-like modifier-activating enzyme 1	UBE1;UBA1
31.7252	NaN	NaN	30.5748	NaN	NaN	30.6244	30.879	30.5886	2	62.3	17.789	11754000000	9	A8K4W8;A0A024R1A4;P68036;A0A1B0GUS4	A8K4W8;A0A024R1A4;P68036	Ubiquitin-conjugating enzyme E2 L3	UBE2L3
30.1827	30.1849	30.2268	30.3702	30.1794	30.3897	30.5126	30.6547	30.4891	17	48.8	58.76	11617000000	132	A8K0I0;A0A024R1C1;Q13356;B4DRD4;F8WC56;Q9BZH8;C9JDF0	A8K0I0;A0A024R1C1;Q13356;B4DRD4	Peptidyl-prolyl cis-trans isomerase-like 2	PPIL2
28.0569	28.3659	28.3531	28.1747	28.3817	28.2902	28.3157	28.2463	28.3255	17	23	96.707	2725100000	53	A8K4N2;A0A024R1C2;O95985;H0Y6W0;B4E3G2;H7C4B0;B3KU89;C9JEI7;C9JEQ1;C9J9X4;C9JKE2;C9JT00;F2Z2A5;B4E3E0	A8K4N2;A0A024R1C2;O95985;H0Y6W0	DNA topoisomerase;DNA topoisomerase 3-beta-1	TOP3B
29.4375	29.2842	29.4204	29.3781	29.4932	29.3034	29.4598	29.2343	29.4921	14	31	78.507	5911100000	63	A0A024R1D6;Q13769;F8WCP5;C9JXG5;H7C441;H7C072;C9JCL9;F5GZF3;C9JXU6	A0A024R1D6;Q13769;F8WCP5;C9JXG5	THO complex subunit 5 homolog	hCG_2011153;THOC5
NaN	NaN	NaN	NaN	NaN	NaN	NaN	NaN	24.0885	2	5.9	59.095	44415000	3	A0A024R1D9;A0A024R1I0;A0A024R1F6;A0A024R1J9;A0A024R1J8;B7Z4B6;P35240	A0A024R1D9;A0A024R1I0;A0A024R1F6;A0A024R1J9;A0A024R1J8;B7Z4B6;P35240	Merlin	NF2
26.534	26.2898	26.3542	26.6276	26.3412	26.0669	26.0664	26.0602	26.1894	2	17.5	15.556	689370000	21	B5MC22;A0A024R1E4;Q9UDX5;L0R6K6;F8WEN7;H7C417	B5MC22;A0A024R1E4;Q9UDX5;L0R6K6;F8WEN7;H7C417	Mitochondrial fission process protein 1	MTFP1;MTP18
24.3024	NaN	24.5365	24.8577	24.7147	24.6356	24.6503	24.7671	NaN	5	4.1	240.76	191160000	8	A0A087WWW8;A0A024R1E5;Q9Y6J0;Q8WTX5;Q9NPU0;B5MEB3	A0A087WWW8;A0A024R1E5;Q9Y6J0;Q8WTX5;Q9NPU0;B5MEB3	Calcineurin-binding protein cabin-1	CABIN1;DKFZp762G2015
28.2736	28.6201	28.3126	28.8333	28.74	28.4428	28.6042	28.5251	28.1728	11	26.5	57.776	3199900000	43	K9MSY5;K9MRS9;A0A024R1E6;P78395;B7ZAT0;B7Z7K8;E7EW99;B7Z986;H7C2P3;A0A0G2JRX7;E7EMH2;B5MD04;A0A0G2JRX8;B5MCY4	K9MSY5;K9MRS9;A0A024R1E6;P78395;B7ZAT0;B7Z7K8;E7EW99;B7Z986;H7C2P3;A0A0G2JRX7;E7EMH2	Melanoma antigen preferentially expressed in tumors	PRAME
26.2184	26.622	26.6429	26.5869	26.4488	26.6258	26.3729	26.773	26.6775	6	10.2	86.359	850050000	13	A0A024R1F9;Q9H1I8;B1AH59;F2Z2W4;F8WAQ6;Q659F6;Q53H58;Q53G98;A0A024R1E1;H7C3Y4	A0A024R1F9;Q9H1I8;B1AH59	Activating signal cointegrator 1 complex subunit 2	ASCC2
NaN	NaN	NaN	NaN	NaN	NaN	NaN	NaN	25.7817	2	9.4	34.582	761650000	2	B7Z976;A0A024R1G9;O60704;B1AHJ5	B7Z976;A0A024R1G9;O60704;B1AHJ5	Protein-tyrosine sulfotransferase 2	TPST2
27.3514	26.9507	27.4899	27.396	26.986	27.3161	27.5203	27.5309	27.6156	7	32.8	31.698	1462800000	36	A0A024R1I3;Q96GD0	A0A024R1I3;Q96GD0	Pyridoxal phosphate phosphatase	PDXP
27.75	27.6988	27.909	27.6675	27.7688	27.6845	27.5096	27.6508	27.4898	12	15.7	96.793	1812300000	28	Q8N523;A0A024R1I7;Q9UBB9;B4DPE5;B4DSX8;H0Y4U8;B1AHQ3	Q8N523;A0A024R1I7;Q9UBB9;B4DPE5;B4DSX8	Tuftelin-interacting protein 11	TFIP11
NaN	26.5393	26.816	26.5316	26.7831	26.8527	26.4409	26.6465	26.5288	4	21.6	39.686	819300000	14	A0A024R1J3;Q00587;B0QYC6;B0QYC7;B0QYC8	A0A024R1J3;Q00587	Cdc42 effector protein 1	CDC42EP1
NaN	25.9131	23.286	24.0773	24.0258	22.1292	NaN	22.7176	NaN	3	9.4	68.93	179870000	7	B4DR76;B1AKL4;A0A024R1K0;Q9NRA8;B0QYZ7;Q6PJR2	B4DR76;B1AKL4;A0A024R1K0;Q9NRA8	Eukaryotic translation initiation factor 4E transporter	EIF4ENIF1
25.8141	NaN	25.3803	NaN	NaN	NaN	NaN	NaN	25.3776	3	15.8	26.282	298290000	6	B1AKM8;B1AKM6;B4DPS3;H0Y7P7;A0A024R1K5;Q9UG56	B1AKM8;B1AKM6;B4DPS3;H0Y7P7;A0A024R1K5;Q9UG56	Phosphatidylserine decarboxylase proenzyme;Phosphatidylserine decarboxylase alpha chain;Phosphatidylserine decarboxylase beta chain	PISD
32.3164	32.3689	32.2954	32.2635	32.2455	32.4959	32.4018	32.4531	32.4602	7	41.9	28.218	46451000000	89	A0A024R1K7;Q04917;B2R6N6;Q9H4N8;F8WEB6;A2IDB1;A2IDB2	A0A024R1K7;Q04917;B2R6N6	14-3-3 protein eta	YWHAH
31.8238	31.6535	31.7968	31.7529	31.6398	31.721	31.9438	31.8413	31.8063	26	40.2	88.885	30921000000	193	A0A024R1K8;Q15459;B4E091;F8WB66;H7C1L2;F8WC79	A0A024R1K8;Q15459;B4E091	Splicing factor 3A subunit 1	SF3A1
NaN	NaN	NaN	25.5048	NaN	25.6761	NaN	NaN	NaN	2	4.5	51.293	255090000	5	A0A024R1L3;Q9H0J7;B0QY95;Q9NQG6	A0A024R1L3;Q9H0J7;B0QY95;Q9NQG6	Mitochondrial dynamics protein MID51	RP5-1104E15.5;DKFZp434F0116;MIEF1
NaN	25.4627	NaN	NaN	25.2138	NaN	25.4095	25.1832	25.1306	3	16	37.078	275380000	4	A0A024R1M8;J3KQL8;B4E1T5;Q9BQE5;E9PM95	A0A024R1M8;J3KQL8;B4E1T5;Q9BQE5	Apolipoprotein L2	APOL2
34.6017	34.7169	34.711	34.7191	34.6656	34.8315	34.6137	34.6577	34.616	113	55.8	226.53	233430000000	1030	A0A024R1N1;P35579;Q86XU5;B4E3S1;Q6ZNL4;Q5BKV1;Q99529;Q9UMJ0;O14729;O14794;Q7Z7R0;Q2PS10;Q68D89;Q66K75	A0A024R1N1;P35579;Q86XU5	Myosin-9	MYH9
33.7338	33.7336	33.8936	33.941	33.864	33.979	33.9763	33.9657	33.9591	35	52.7	69.842	134090000000	340	A0A024R1N4;P12956;B2RDN9;B1AHC9;B4DE32;B4E356;Q6IC76	A0A024R1N4;P12956;B2RDN9;B1AHC9;B4DE32;B4E356	X-ray repair cross-complementing protein 6	XRCC6
29.3175	29.2883	29.5968	29.8944	29.8821	29.8345	29.3122	29.1756	29.3729	4	25	16.775	6543300000	42	B1AH77;B1AH80;A0A024R1P2;P15153;B1AH78	B1AH77;B1AH80;A0A024R1P2;P15153;B1AH78	Ras-related C3 botulinum toxin substrate 2	RAC2
NaN	25.4718	NaN	NaN	25.8157	NaN	NaN	NaN	NaN	2	20.6	22.918	347240000	11	A0A024R1P3;Q9Y535;E7ERZ2;Q6ZPA8;F8WDV1;F8WDS5	A0A024R1P3;Q9Y535;E7ERZ2;Q6ZPA8;F8WDV1;F8WDS5	DNA-directed RNA polymerase III subunit RPC8	POLR3H
29.2922	28.6677	28.6629	28.2331	28.5592	28.6629	29.0681	28.6251	28.8956	11	27.8	79.083	3880200000	30	B4DIU6;A0A024R1P7;B4E2A6;Q9UH99;Q6NT72;A8K129;B0QY60;A0A024R1S6	B4DIU6;A0A024R1P7;B4E2A6;Q9UH99;Q6NT72;A8K129	SUN domain-containing protein 2	UNC84B;SUN2
NaN	NaN	NaN	NaN	NaN	NaN	NaN	23.7301	NaN	2	3.5	70.256	76965000	1	A0A087X1T2;G3V0I8;B4DSU0;A0A024R1Q0;Q12772;X6RBE4;F6V242;B5MD58;B3KXZ7;B4DLQ8;B4DGV9;B4DEU6;P36956	A0A087X1T2;G3V0I8;B4DSU0;A0A024R1Q0;Q12772;X6RBE4;F6V242;B5MD58;B3KXZ7;B4DLQ8;B4DGV9;B4DEU6;P36956	Sterol regulatory element-binding protein 2;Processed sterol regulatory element-binding protein 2;Sterol regulatory element-binding protein 1;Processed sterol regulatory element-binding protein 1	SREBF2;SREBF1
26.8967	26.8796	26.8125	26.7617	27.0404	26.9356	26.6736	NaN	NaN	3	10.7	46.564	888890000	5	A0A024R1Q5;P17050	A0A024R1Q5;P17050	Alpha-N-acetylgalactosaminidase	NAGA
33.1801	33.1942	33.3375	33.1485	33.1259	33.3294	33.5443	33.4117	33.3683	8	56	9.6694	88611000000	93	C9JD32;B9ZVP7;J3KT29;Q9BTQ7;A0A024R1Q8;P62829;A4D142	C9JD32;B9ZVP7;J3KT29;Q9BTQ7;A0A024R1Q8;P62829	60S ribosomal protein L23	RPL23
NaN	NaN	NaN	NaN	NaN	NaN	NaN	NaN	24.6633	2	4.8	62.768	112930000	1	B2R935;A0A024R1S2;Q99741;J3QLN7	B2R935;A0A024R1S2;Q99741;J3QLN7	Cell division control protein 6 homolog	CDC6
29.4936	29.609	29.5485	29.5703	29.3958	29.608	29.4013	29.2828	29.4837	11	30.9	71.463	6312900000	59	A0A024R1S5;O00178;B2RDW9;F5H716;F5H257;B0QY59	A0A024R1S5;O00178;B2RDW9	GTP-binding protein 1	GTPBP1
30.324	30.3828	30.5319	30.4196	30.4755	30.603	30.5964	30.5178	30.5361	14	44.3	46.649	12690000000	87	A0A024R1S7;Q969G3;B4DGM3;J3QKS7;K7EMQ8;H7C048;J3QKX6;J3QR61;C0IMW8;J3KT85;J3KS99;J3QL66	A0A024R1S7;Q969G3;B4DGM3;J3QKS7;K7EMQ8;H7C048	SWI/SNF-related matrix-associated actin-dependent regulator of chromatin subfamily E member 1	SMARCE1
30.5584	30.3474	30.4546	30.2343	30.3467	30.8019	30.2841	30.2746	30.4248	6	38.7	29.645	12477000000	38	A8K1D2;A0A024R1S8;Q14847;C9J9W2;B4DIC4;B4DJI4;F6S2S5;J3KSN1;Q9NPR7	A8K1D2;A0A024R1S8;Q14847;C9J9W2;B4DIC4;B4DJI4	LIM and SH3 domain protein 1	LASP1
NaN	NaN	NaN	NaN	NaN	NaN	26.5884	NaN	NaN	4	13.2	15.434	331920000	6	A0A024R1T1;Q86WX3	A0A024R1T1;Q86WX3	Active regulator of SIRT1	RPS19BP1
26.1718	27.0669	26.7327	26.5066	27.0178	26.411	26.2937	26.4769	26.1057	7	9.3	148.57	833790000	30	H0Y720;A0A024R1T4;Q9UPQ9;B4E231;A0A024R1N5	H0Y720;A0A024R1T4;Q9UPQ9;B4E231	Trinucleotide repeat-containing gene 6B protein	TNRC6B
29.1828	29.4809	29.5592	29.5035	29.2958	29.5513	29.4678	29.4641	29.2931	12	38.7	45.098	6051400000	83	A0A024R1T5;P09543;K7ERC4;B4DFN6;B4DI06;C9K0L8;K7ERZ0;K7EN66	A0A024R1T5;P09543	2,3-cyclic-nucleotide 3-phosphodiesterase	CNP
24.8079	25.5765	24.4261	24.3917	24.1413	24.29	24.4915	24.7212	24.174	2	9.2	80.147	216720000	15	A0A024R1T8;Q9NVR0;B4DXF5	A0A024R1T8;Q9NVR0;B4DXF5	Kelch-like protein 11	KLHL11
33.4335	33.5577	33.6862	34.027	34.0155	33.9699	33.5455	33.5085	33.5988	41	45	120.84	117900000000	271	A0A024R1T9;Q4LE36;P53396;A0A024R1Y2;Q8N9C4;K7ESG8;K7EIE7	A0A024R1T9;Q4LE36;P53396;A0A024R1Y2;Q8N9C4	ATP-citrate synthase	ACLY;ACLY variant protein
31.8416	31.9899	32.0077	31.9035	31.8766	32.0366	32.1817	32.1746	32.1511	25	50.6	63.541	36596000000	163	A0A024R1U0;P46060;B4DY16;B4E0U0;H0Y4Q3;Q9BSK3;Q8WUS7;B0QYT5;B0QYT4	A0A024R1U0;P46060;B4DY16;B4E0U0;H0Y4Q3	Ran GTPase-activating protein 1	RANGAP1
NaN	NaN	NaN	NaN	25.3082	NaN	NaN	NaN	NaN	2	22.7	12.405	224920000	6	A0A024R1U2;Q7RTV0	A0A024R1U2;Q7RTV0	PHD finger-like domain-containing protein 5A	PHF5A
30.8321	30.5258	30.6549	30.6965	30.3973	30.4885	30.3782	30.3806	30.5144	9	54.2	23.482	13192000000	46	A0A024R1U4;P51148;K7ERI8;K7ERQ8;K7ENY4;F8VVK3;F8VVZ0;F8VUA5;F8VWU4;F8WCY6;F8WD79;F8VPW9;F8VSF8;F8VWZ7;A0A1B0GWA9;A0A1B0GVC3;K7EN06;O95057;Q96HU8	A0A024R1U4;P51148;K7ERI8;K7ERQ8;K7ENY4;F8VVK3	Ras-related protein Rab-5C	RAB5C
NaN	23.8583	NaN	NaN	NaN	NaN	NaN	NaN	NaN	2	5.6	54.083	95395000	8	Q3LRJ5;Q3LRJ8;Q3LRK1;Q3LRI0;Q3LRI6;B7Z5R6;A0A024R1Y3;A0A024R1V3;Q14596;Q3LRI9;A8K1U0	Q3LRJ5;Q3LRJ8;Q3LRK1;Q3LRI0;Q3LRI6;B7Z5R6;A0A024R1Y3;A0A024R1V3;Q14596;Q3LRI9;A8K1U0	Next to BRCA1 gene 1 protein	NBR1
33.4103	33.6446	33.9223	33.7727	33.6749	33.854	33.8978	33.7804	33.8541	7	45.2	14.257	122360000000	108	E4W6B6;B2R4D8;A0A024R1V4;P61353;K7ELC7;K7EQQ9;K7ERY7	E4W6B6;B2R4D8;A0A024R1V4;P61353;K7ELC7	60S ribosomal protein L27	RPL27
NaN	NaN	NaN	NaN	NaN	NaN	NaN	NaN	24.5989	2	3.3	89.832	96560000	1	A0A0U1RRA9;Q7Z606;Q5YLB2;A0A024R1V8;A0A024R1Y1;Q3LRH8;A0A024R1W0;Q5XLT4;G8I0D8;A0A024R1Y0;P38398;Q64FK3;A0A0F6RAD1;A0A0F6TMZ3;A0A0A1ESW9;A0A0G3FC22;A0A0A0MSN1;Q6P671;E9PH68;E7EWN5;Q05BZ9	A0A0U1RRA9;Q7Z606;Q5YLB2;A0A024R1V8;A0A024R1Y1;Q3LRH8;A0A024R1W0;Q5XLT4;G8I0D8;A0A024R1Y0;P38398;Q64FK3;A0A0F6RAD1;A0A0F6TMZ3;A0A0A1ESW9;A0A0G3FC22;A0A0A0MSN1;Q6P671;E9PH68;E7EWN5;Q05BZ9	Breast cancer type 1 susceptibility protein	BRCA1
25.9557	25.848	25.9766	26.3922	25.8523	26.135	25.7073	NaN	25.6492	2	14.4	17.494	525990000	15	A0A024R1W6;Q8N138;J3KTF9;J3QRM9	A0A024R1W6;Q8N138;J3KTF9;J3QRM9	ORM1-like protein 3	ORMDL3
26.5169	26.5871	26.7824	26.7826	26.6453	26.8115	26.5126	26.4626	26.5996	2	7.5	70.077	868420000	15	B4DKR6;A0A024R1X0;O15234;J3KSY7	B4DKR6;A0A024R1X0;O15234;J3KSY7	Protein CASC3	CASC3
27.4936	27.7143	27.4295	27.5163	27.5819	27.8056	27.598	27.3706	27.5478	5	33.5	20.747	1660100000	13	A0A024R1X3;Q9BRG1;K7ENE3;K7EKV4;K7EP45	A0A024R1X3;Q9BRG1;K7ENE3	Vacuolar protein-sorting-associated protein 25	VPS25
NaN	NaN	NaN	NaN	NaN	23.5862	NaN	NaN	NaN	2	22.6	11.731	67815000	1	A0A024R1X4;Q9Y2R0;K7EPV0	A0A024R1X4;Q9Y2R0;K7EPV0	Cytochrome c oxidase assembly factor 3 homolog, mitochondrial	hCG_16955;COA3
NaN	NaN	NaN	NaN	NaN	NaN	NaN	NaN	23.3396	2	12.2	26.784	26151000	3	K7ELY9;E7EV84;B4DQ36;W0FFG4;B4DS82;Q53F78;A0A024R1X5;Q14457	K7ELY9;E7EV84;B4DQ36;W0FFG4;B4DS82;Q53F78;A0A024R1X5;Q14457	Beclin-1	BECN1
26.5366	26.5183	26.8723	26.8428	26.6447	26.7636	26.8403	26.7201	26.7171	5	12.5	81.744	928730000	12	A0A0S2Z487;A0A024R1X8;P14923;A0A0S2Z495	A0A0S2Z487;A0A024R1X8;P14923;A0A0S2Z495	Junction plakoglobin	JUP
24.3546	25.171	24.3776	25.0451	NaN	24.8024	24.7527	24.7029	NaN	4	10.6	57.522	241390000	9	A0A024R1Y7;Q8N2G8;K7ESN3;K7EJT7;K7EQ41;K7EL54;B3KVB0	A0A024R1Y7;Q8N2G8;K7ESN3;K7EJT7;K7EQ41;K7EL54;B3KVB0	GH3 domain-containing protein	LGP1;GHDC
27.2229	NaN	27.3843	27.0215	NaN	26.9915	27.449	27.7621	27.0646	3	12.3	26.736	1194000000	15	A0A024R1Z1;P49427;U3KQP9	A0A024R1Z1;P49427	Ubiquitin-conjugating enzyme E2 R1	CDC34
31.9614	31.9252	31.9888	32.192	31.8429	31.9308	31.581	31.4077	31.5453	18	63.4	41.92	32047000000	150	A0A024R1Z6;Q99536;B3KUF8;K7ESA3;K7ERT7;K7ENX2;K7EM19;K7EJM4;K7ER81	A0A024R1Z6;Q99536;B3KUF8	Synaptic vesicle membrane protein VAT-1 homolog	VAT1
32.0104	31.9926	32.0247	32.118	31.9783	31.7707	31.8299	31.695	31.781	18	50	42.918	33763000000	148	A0A024R201;Q9UNM6;B4DJ66;B2RBM7;Q9Y6E3;J3KNQ3;Q53GN6;A0A087WUL9;H0YD73;E9PL38;Q9UNM7;Q5HYL3;E9PQG3;E9PPD2	A0A024R201;Q9UNM6;B4DJ66;B2RBM7;Q9Y6E3;J3KNQ3;Q53GN6;A0A087WUL9	26S proteasome non-ATPase regulatory subunit 13	PSMD13
32.3418	32.12	32.1654	31.8618	31.8914	31.7468	32.1023	32.2098	32.0037	12	55.1	29.506	37812000000	110	V9HWJ8;A0A024R203;P61289;K9J957;Q6FHK7;K7ENH2;B3KQ25;K7ESG5;J7FRP4;A0A087WTV2;B7Z8D3;K7EMD0;K7EPX6;K7EKR3	V9HWJ8;A0A024R203;P61289;K9J957;Q6FHK7;K7ENH2;B3KQ25;K7ESG5;J7FRP4;A0A087WTV2	Proteasome activator complex subunit 3	HEL-S-283;PSME3
30.2475	30.627	30.8974	30.8606	30.9478	31.1084	30.9957	30.6552	30.6549	3	29.6	13.938	15541000000	51	A0A024R210;H7BYV1;E9PQN9;H9NL12;P13164;Q01629	A0A024R210		IFITM1
32.4448	32.186	32.5607	33.204	32.7606	33.0123	32.3829	31.891	32.4501	19	50.5	40.422	54041000000	166	A0A024R222;Q9Y617;B4DHQ3;A0A024R280;B4DHX7;A9LS35	A0A024R222;Q9Y617;B4DHQ3;A0A024R280	Phosphoserine aminotransferase	PSAT1
34.3429	34.3881	34.4024	34.3526	34.2574	34.3354	34.4222	34.4663	34.3915	23	64.1	51.218	188940000000	328	A0A024R228;P61978;B3KU16;S4R457;S4R359	A0A024R228;P61978	Heterogeneous nuclear ribonucleoprotein K	HNRPK;HNRNPK
29.6142	29.4536	29.5395	29.603	29.459	29.3739	29.6826	29.7517	29.6928	18	21.4	133.97	6722100000	89	A0A024R233;Q9UDY2;A0A1B0GTW1;A0A024R225;B7Z954;B7Z2R3	A0A024R233;Q9UDY2;A0A1B0GTW1;A0A024R225;B7Z954;B7Z2R3	Tight junction protein ZO-2	TJP2
26.1243	26.0792	26.0359	25.9365	25.8398	NaN	25.8643	25.7977	25.8652	3	2.1	166.97	512390000	4	A0A024R235;Q5VYS8;X6R3Q3;A0A0C4DFW3	A0A024R235;Q5VYS8;X6R3Q3	Terminal uridylyltransferase 7	ZCCHC6
26.4617	26.8941	26.8044	26.8011	27.2262	NaN	26.3118	NaN	25.4186	6	19.2	42.111	821730000	12	G9FP35;A0A024R240;P50148;G3V1P7;Q59FM5;P29992;B7Z581;K7EL62;O95837;B1AM21	G9FP35;A0A024R240;P50148;G3V1P7;Q59FM5;P29992;B7Z581;K7EL62	Guanine nucleotide-binding protein G(q) subunit alpha;Guanine nucleotide-binding protein subunit alpha-11	GNAQ;GNA11
27.5382	27.7208	27.6792	27.7067	27.5364	27.5706	27.5821	27.0162	27.4687	7	20.6	72.019	1640800000	20	A8K4G2;A0A024R244;P43405;A0A024R273;B3KQJ1;C3W981;C3W980	A8K4G2;A0A024R244;P43405;A0A024R273	Tyrosine-protein kinase;Tyrosine-protein kinase SYK	SYK
NaN	NaN	NaN	NaN	22.4126	NaN	NaN	NaN	NaN	2	12	20.625	16492000	2	A0A024R248;Q96LW7	A0A024R248;Q96LW7	Bcl10-interacting CARD protein	C9orf89
26.8744	27.0476	27.33	26.9643	26.8866	27.1792	27.23	27.353	27.2566	10	12	132.32	1233300000	27	A0A024R250;Q76FK4;B4DM91;F8WE42;F5H101;F5GWN9;A6H8Z4;Q6AI50;A0A0A0MSJ1;F5H532;F5H0I5;F5H8B8;F5GXV1;F5H797;F5H692;Q7Z607;F5H7D5	A0A024R250;Q76FK4;B4DM91;F8WE42;F5H101;F5GWN9;A6H8Z4;Q6AI50;A0A0A0MSJ1	Nucleolar protein 8	NOL8;DKFZp686P12242
31.3563	30.7864	31.5406	31.1639	30.4968	30.8575	31.3231	31.1404	31.4359	14	28.2	59.219	20193000000	122	A0A024R258;B3KNI8;B3KNI2;Q9UMX0;Q59FJ2	A0A024R258;B3KNI8;B3KNI2;Q9UMX0;Q59FJ2	Ubiquilin-1	UBQLN1
33.3153	33.9595	33.8566	33.6453	33.8948	33.9689	33.9025	34.1132	33.9975	8	49.1	19.586	131190000000	142	A0A087WXM6;J3QQT2;J3KRX5;A0A024R261;A0A0A6YYL6;P18621;J3QLC8;A0A0A0MRF8;J3KRB3;A0A087WWH0;J3QS96;A0A087WY81;J3KSJ0;A4D1R6;A4D1R5	A0A087WXM6;J3QQT2;J3KRX5;A0A024R261;A0A0A6YYL6;P18621;J3QLC8;A0A0A0MRF8;J3KRB3;A0A087WWH0;J3QS96;A0A087WY81	60S ribosomal protein L17	RPL17;hCG_24487;RPL17-C18orf32
26.4856	26.8034	27.0137	26.8085	27.0292	27.1374	27.2006	26.9149	27.0454	8	21.7	50.052	1087700000	25	K7EIU8;A0A024R274;Q13485;Q9BYG6;A0A0S2Z4B2;K7EIJ2;K7ENG8;B4DZP1;K7ES96;K7EL18;K7EL15;A0A087WUF3;K7ELK2	K7EIU8;A0A024R274;Q13485;Q9BYG6;A0A0S2Z4B2;K7EIJ2;K7ENG8;B4DZP1;K7ES96;K7EL18	Mothers against decapentaplegic homolog;Mothers against decapentaplegic homolog 4	SMAD4
29.0671	29.037	28.8384	28.8656	28.9142	29.1785	28.7492	28.6882	28.7009	8	31.8	37.53	4202200000	46	B3KQK4;A0A024R276;P07711;A5PLM9;Q9HBQ7;Q5T8F0;Q5K630;Q6LAF7	B3KQK4;A0A024R276;P07711;A5PLM9;Q9HBQ7;Q5T8F0	Cathepsin L1;Cathepsin L1 heavy chain;Cathepsin L1 light chain	CTSL;CTSL1
28.6749	29.2581	28.9836	28.8788	28.9137	28.8692	29.3715	29.3492	29.46	7	20.1	52.743	4864200000	46	A0A024R277;O15269;Q6NUL7;Q59EQ4;B4DR90	A0A024R277;O15269;Q6NUL7	Serine palmitoyltransferase 1	SPTLC1
25.1234	25.8247	25.5255	25.6742	26.0843	25.142	24.6299	25.5658	25.493	5	10	96.27	396750000	25	A0A024R281;A0A024R2A4;A0A1B0GVY1;Q96PU5;B7Z2P9;B7Z6K0;K7ERN1	A0A024R281;A0A024R2A4;A0A1B0GVY1;Q96PU5;B7Z2P9;B7Z6K0;K7ERN1	E3 ubiquitin-protein ligase NEDD4-like	NEDD4L
27.5503	27.7331	27.6716	27.6895	28.0728	27.9559	28.1441	28.3154	27.9748	6	29	29.484	2129100000	41	A0A024R294;Q96BD8;K7EP61;K7EPW0	A0A024R294;Q96BD8;K7EP61	Spindle and kinetochore-associated protein 1	C18orf24;SKA1
26.0618	26.3001	26.1603	26.0901	26.1232	26.1468	26.2444	26.2737	26.2821	4	8.2	89.517	640560000	13	A0A024R2A0;A1L4F5;Q01974;B1APY4	A0A024R2A0;A1L4F5;Q01974;B1APY4	Tyrosine-protein kinase transmembrane receptor;Tyrosine-protein kinase transmembrane receptor ROR2	ROR2
32.2266	32.1725	32.2974	32.4948	32.4416	32.6227	32.2755	32.1906	32.2972	17	41.2	57.548	45968000000	198	A0A024R2A7;P49257;B2R774;Q53FS4;A0PJ85;B4DVV0	A0A024R2A7;P49257;B2R774;Q53FS4	Protein ERGIC-53	LMAN1
NaN	NaN	NaN	NaN	NaN	NaN	24.082	NaN	NaN	2	2.9	97.033	94326000	0	Q96ES0;B2RD46;A0A024R2B0;Q9P260	Q96ES0;B2RD46;A0A024R2B0;Q9P260	LisH domain and HEAT repeat-containing protein KIAA1468	KIAA1468
27.8367	27.8806	27.6481	27.8321	27.7377	27.987	27.801	27.754	27.9388	4	20.3	49.23	1993200000	16	A8K5D8;A8K4G7;A0A024R2C5;O75351	A8K5D8;A8K4G7;A0A024R2C5;O75351	Vacuolar protein sorting-associated protein 4B	VPS4B
30.1237	29.2343	29.2829	29.1667	28.9053	29.0788	28.9285	28.947	29.4058	8	62.1	20.598	5527800000	44	B4DQT8;A0A024R2D4;B4E1J8;Q9NVJ2	B4DQT8;A0A024R2D4;B4E1J8;Q9NVJ2	ADP-ribosylation factor-like protein 8B	ARL8B
27.0314	27.0657	27.0402	27.3671	27.1842	27.3438	27.173	26.9127	27.0064	7	12.5	77.003	1226200000	18	A0A024R2E9;B3KQM6;B2RB57;O95352;B4DQK1;C9J415;C9JFF4;C9JGL2;F8WDY9;C9JNU2;C9JKA3;H7C2R3;H7BZ92;C9JE55;H7C2J8	A0A024R2E9;B3KQM6;B2RB57;O95352;B4DQK1	Ubiquitin-like modifier-activating enzyme ATG7	ATG7
29.4054	29.1232	29.3109	29.3567	29.1785	29.3656	29.4344	29.3982	29.3255	14	37.1	57.002	5645500000	41	A0A024R2F4;Q9BV44;H7C3J3;H7C0R6	A0A024R2F4;Q9BV44;H7C3J3;H7C0R6	THUMP domain-containing protein 3	THUMPD3
29.5184	29.2808	29.3344	29.3556	28.9507	29.0838	29.2181	29.0886	29.3093	3	39.4	15.996	5356400000	52	A0A024R2I5;A0A024R2F8;Q8N4Q1	A0A024R2I5;A0A024R2F8;Q8N4Q1	Mitochondrial intermembrane space import and assembly protein 40	CHCHD4
30.6457	30.3311	30.3216	30.5157	30.3161	30.6991	30.4429	30.4966	30.5293	15	47	44.875	12587000000	77	A0A024R2F9;Q9BTV4;A0A0S2Z5N2;V9GY05	A0A024R2F9;Q9BTV4;A0A0S2Z5N2	Transmembrane protein 43	TMEM43
32.0535	32.2547	31.9706	31.9363	32.094	32.4839	32.2025	32.1903	32.2985	7	46.6	15.616	40636000000	46	D3YTB1;A0A024R2G7;F8W727;P62910;D3YTI8	D3YTB1;A0A024R2G7;F8W727;P62910	60S ribosomal protein L32	RPL32
28.8075	29.2833	29.3174	29.4432	29.4168	29.5325	29.2617	29.306	29.3212	14	19.4	112.96	5566700000	55	A0A024R2G8;O15084;B4DIW9;B7Z6Z7;B4DS25;H7C4A0;Q53T07;H7C209;Q8N8A2	A0A024R2G8;O15084;B4DIW9	Serine/threonine-protein phosphatase 6 regulatory ankyrin repeat subunit A	ANKRD28
26.5949	25.2933	NaN	25.7838	NaN	NaN	25.7084	NaN	25.6923	3	13.5	34.838	495180000	5	A0A024R2G9;C9JLB7;B4DQJ7;Q96HP4;U3KQU8	A0A024R2G9;C9JLB7;B4DQJ7;Q96HP4;U3KQU8	Oxidoreductase NAD-binding domain-containing protein 1	OXNAD1
27.3478	27.1446	27.1438	27.2569	27.9589	27.0492	27.0857	26.8847	27.0142	7	15.5	89.003	1332700000	15	B9A6K1;A0A024R2J9;A0A024R2H0;Q92609;C9J3F6;C9JMP7;C9JIU4;F2Z3I5;C9JNM0;C9JED7;F2Z3C3;C9K0P2;C9J397;C9JWX0;C9JW04;C9JDR8	B9A6K1;A0A024R2J9;A0A024R2H0;Q92609;C9J3F6	TBC1 domain family member 5	TBC1D5
28.9915	28.7435	29.0269	29.1076	28.8606	29.1811	29.0398	28.9163	29.2039	13	36.2	50.143	4536200000	50	A0A024R2H7;Q96Q11	A0A024R2H7;Q96Q11	CCA tRNA nucleotidyltransferase 1, mitochondrial	TRNT1
NaN	NaN	NaN	NaN	NaN	NaN	24.9865	NaN	NaN	2	9.9	45.341	103660000	2	J3QT87;A0A024R2H8;A0A1W2PPJ5;Q96SW2;J3QT51;B4DW89	J3QT87;A0A024R2H8;A0A1W2PPJ5;Q96SW2;J3QT51;B4DW89	Protein cereblon	CRBN
27.4668	27.0371	27.7718	26.8896	27.0601	27.4616	27.6723	27.8137	27.694	7	17.6	56.194	1569000000	31	A0A024R2I7;Q9NS91;F8WE49;Q53H10;C9J0Q4	A0A024R2I7;Q9NS91;F8WE49;Q53H10	E3 ubiquitin-protein ligase RAD18	RAD18
28.2425	28.4289	28.336	28.4686	28.3091	28.2505	28.0314	28.2485	28.4911	7	17.3	56.452	2793400000	34	A0A024R2J0;A8KAN5;A0A024R2L0;Q9NZI7;C9JWL3;F8WEP8;B3KN18	A0A024R2J0;A8KAN5;A0A024R2L0;Q9NZI7	Upstream-binding protein 1	UBP1
28.5208	28.04	28.4149	28.0295	27.9708	27.8376	27.8122	27.8054	27.9052	4	45.6	23.658	2358100000	14	A0A024R2K1;P20339;A0A0A1HAN9	A0A024R2K1;P20339;A0A0A1HAN9	Ras-related protein Rab-5A	RAB5A
NaN	27.3137	NaN	NaN	NaN	NaN	NaN	NaN	NaN	2	19.7	16.21	369700000	10	C9J2P0;H7C061;B7Z306;A0A024R2K3;P51965;A0A087X283	C9J2P0;H7C061;B7Z306;A0A024R2K3;P51965;A0A087X283	Ubiquitin-conjugating enzyme E2 E1	UBE2E1;UBE2E2
27.3509	28.2823	28.0218	27.9774	27.8886	27.8361	28.4134	27.944	27.7591	5	16.4	49.343	2199900000	21	A0A1S5UZ17;A0A024R2K4;Q9Y608;C9JJC9;C9JC17;C9J321;C9J0U5;C9JSU1	A0A1S5UZ17;A0A024R2K4;Q9Y608	Leucine-rich repeat flightless-interacting protein 2	LRRFIP2
29.3232	29.445	29.5072	29.5162	29.3479	29.6585	29.5122	29.5452	29.6213	12	25.6	76.21	6387800000	67	A0A024R2L1;Q8TAF3	A0A024R2L1;Q8TAF3	WD repeat-containing protein 48	WDR48
29.8739	29.7839	29.8131	29.8401	29.8637	30.1375	29.8134	29.8484	29.8803	11	35.1	44.292	8272600000	65	A0A024R2M6;P09110;C9JDE9;Q8NCW8;B4DEN6;A0A140VJX0;H0Y4D4;H7C131;B4E072;F2Z2Q6;F2Z3P7;B4DVF4;O43203	A0A024R2M6;P09110;C9JDE9;Q8NCW8;B4DEN6;A0A140VJX0;H0Y4D4;H7C131	3-ketoacyl-CoA thiolase, peroxisomal	ACAA1
29.4091	29.362	29.2633	29.3587	29.0499	29.4028	29.2562	29.0374	29.1862	8	16.9	58.022	5401900000	30	A0A024R2M7;O95747;C9JIG9	A0A024R2M7;O95747;C9JIG9	Serine/threonine-protein kinase OSR1	OXSR1
29.1157	29.085	29.3038	29.4164	29.5249	29.7422	29.3954	29.2534	29.4861	12	15.5	105.95	5836400000	72	A0A024R2M8;X5DRB1;Q01831;D9I4E1;A8K146;D2CPJ1;D2CPI8;D2CPJ3;D2CPJ9;D2CPI9;D2CPJ0;D2CPJ4;D2CPJ5;D2CPK1;E7EUB5;D2CPK7;D2CPK0	A0A024R2M8;X5DRB1;Q01831;D9I4E1;A8K146;D2CPJ1;D2CPI8	DNA repair protein complementing XP-C cells	XPC
27.3329	27.1733	27.0582	27.6115	27.0082	27.1356	26.9871	27.0837	NaN	2	32.5	8.8131	1273400000	12	C9JAW5;B2R4G1;A0A024R2M9;C9JNU6;Q9Y241;A8MV81	C9JAW5;B2R4G1;A0A024R2M9;C9JNU6;Q9Y241;A8MV81	HIG1 domain family member 1A, mitochondrial;HIG1 domain family member 1C	HIGD1A;HIGD1C
27.4062	27.5818	27.5988	27.7962	27.9725	28.2181	28.2158	27.9846	28.1408	8	9.2	165.67	2101800000	30	A0A024R2N6;P30414;Q6M1B8;A0A087WYW3;Q6N014	A0A024R2N6;P30414;Q6M1B8;A0A087WYW3	NK-tumor recognition protein;Putative peptidyl-prolyl cis-trans isomerase	NKTR;DKFZp686J06106
34.6129	34.6861	34.5696	34.5418	34.3743	34.4587	34.6302	34.6079	34.6474	22	75.7	29.404	213700000000	200	C9J9K3;A0A024R2P0;P08865;A0A0C4DG17;Q96RS2;A0A024R7P5;F8WD59;A0A024RCF2	C9J9K3;A0A024R2P0;P08865;A0A0C4DG17;Q96RS2;A0A024R7P5;F8WD59	40S ribosomal protein SA	RPSA;LOC388524
28.1938	28.5206	28.1691	28.0982	28.2005	28.2622	28.3812	28.3956	28.1765	4	20.3	31.874	2719600000	31	B2RDZ9;A0A024R2P7;Q15024;B4DIU0	B2RDZ9;A0A024R2P7;Q15024;B4DIU0	Exosome complex component RRP42	EXOSC7
31.4255	32.3664	31.5315	31.6223	32.0008	31.4265	31.441	31.629	31.2773	11	43.6	24.146	28951000000	97	A0A024R2Q4;P61313;E7EQV9;E7ENU7;E7EX53;B4DLP4;B4DEN1;E7ERA2;A4D1Q5	A0A024R2Q4;P61313;E7EQV9;E7ENU7;E7EX53;B4DLP4	Ribosomal protein L15;60S ribosomal protein L15	RPL15
26.5539	26.452	26.6288	26.7407	26.1623	26.549	26.0493	26.1518	26.1412	4	26.8	24.845	746430000	24	C9JQQ2;A0A024R2Q9;Q9NWU1;C9J2G3;F8VNS3	C9JQQ2;A0A024R2Q9;Q9NWU1;C9J2G3	3-oxoacyl-[acyl-carrier-protein] synthase, mitochondrial	OXSM
27.5707	27.8109	27.7371	28.1005	27.9269	27.9678	27.582	27.4647	27.2809	4	9.1	76.328	1859200000	26	A0A024R2S0;Q9NW15;C9IZD0;C9JA49;C9IYD3;C9JQC9;C9JPY2;H7C3N6;C9J670	A0A024R2S0;Q9NW15;C9IZD0;C9JA49;C9IYD3;C9JQC9;C9JPY2;H7C3N6;C9J670	Anoctamin;Anoctamin-10	TMEM16K;ANO10
25.8177	25.9781	25.7645	25.7128	25.5644	25.9479	26.1584	25.5625	25.7621	3	6.4	103.96	496940000	11	A0A024R2X6;Q08AK7;A0A024R2T0;Q13107;Q53H56;Q53FJ3;H7C189;C9JNU9	A0A024R2X6;Q08AK7;A0A024R2T0;Q13107;Q53H56;Q53FJ3;H7C189	Ubiquitin carboxyl-terminal hydrolase;Ubiquitin carboxyl-terminal hydrolase 4	USP4
NaN	NaN	NaN	NaN	NaN	NaN	NaN	NaN	22.4762	2	3.1	63.638	63741000	4	A0A024R2T4;O94889;Q96B51;F8WCL4;F8WF78;C9J4G4;Q9H8E7;Q647K1;Q6PJF0;B4DHW4	A0A024R2T4;O94889;Q96B51;F8WCL4;F8WF78;C9J4G4;Q9H8E7;Q647K1;Q6PJF0;B4DHW4	Kelch-like protein 18	KLHL18
30.9444	30.7983	30.8728	30.6478	30.6922	30.6968	31.0135	31.0316	30.8833	28	25.4	130.55	16224000000	136	H7BXY3;A0A024R2T6;Q7L2E3;Q6W6M7	H7BXY3;A0A024R2T6;Q7L2E3	Putative ATP-dependent RNA helicase DHX30	DHX30
NaN	NaN	NaN	24.1166	NaN	NaN	NaN	NaN	NaN	2	19.9	15.735	88084000	2	H7C0J2;B4DTM0;C9J0V5;G3V0G1;A0A024R2U5;Q9BQQ3;C9J5S6;C9J9V9	H7C0J2;B4DTM0;C9J0V5;G3V0G1;A0A024R2U5;Q9BQQ3;C9J5S6;C9J9V9	Golgi reassembly-stacking protein 1	GORASP1
NaN	26.4924	26.7699	26.8035	NaN	26.5129	26.3012	26.398	26.8123	5	13.7	56.11	810530000	11	Q59HE6;A0A024R2U6;P52756	Q59HE6;A0A024R2U6;P52756	RNA-binding protein 5	RBM5
29.6202	28.8969	29.8463	29.3664	28.814	29.0806	29.934	29.5705	29.7915	14	30.2	81.224	6362400000	54	A0A024R2U9;C9JIF9;P13798;H7C393;H7C1U0;C9JLK2;F8WEH5	A0A024R2U9;C9JIF9;P13798;H7C393	Acylamino-acid-releasing enzyme	APEH
25.3684	24.1008	24.7105	24.7656	NaN	24.7362	24.6941	24.4885	24.4469	2	2.4	86.814	229780000	9	C9J266;B3KU09;A0A024R2V1;Q5XPI4;C9JS59	C9J266;B3KU09;A0A024R2V1;Q5XPI4;C9JS59	E3 ubiquitin-protein ligase RNF123	RNF123;hCG_20123
28.4152	28.7568	28.5304	28.6978	29.0883	28.8828	28.7594	28.8274	28.6359	10	37.2	43.066	3756700000	57	A0A0S2Z472;A8KAH7;A0A024R2W3;P13861;H7C330;H7C1L0	A0A0S2Z472;A8KAH7;A0A024R2W3;P13861	cAMP-dependent protein kinase type II-alpha regulatory subunit	PRKAR2A
24.8416	NaN	NaN	NaN	NaN	NaN	NaN	NaN	NaN	3	18.1	43.006	377070000	3	B5BUJ8;B2R8Z2;A8K4K4;A0A024R2W7;Q16644;C9J8E1;A0A024R177;A0A024RBU5;Q96PN8;O43930;P51817	B5BUJ8;B2R8Z2;A8K4K4;A0A024R2W7;Q16644;C9J8E1	MAP kinase-activated protein kinase 3	MAPKAPK3
27.2829	27.119	27.1173	27.4139	27.2525	27.4028	27.0596	27.0322	27.0556	8	32.2	39.834	1288900000	19	A0A024R2X1;A0A024R329;Q9Y5P6	A0A024R2X1;A0A024R329;Q9Y5P6	Mannose-1-phosphate guanyltransferase beta	GMPPB
25.7673	25.7947	26.0358	26.6202	25.9471	25.838	26.4782	26.7037	26.7772	3	10.2	50.235	732660000	12	A0A024R2X2;Q92551;C9JNA8	A0A024R2X2;Q92551;C9JNA8	Inositol hexakisphosphate kinase 1	IHPK1;IP6K1
NaN	NaN	NaN	NaN	NaN	25.28	NaN	NaN	NaN	2	15.4	38.225	168300000	2	B2RAF3;A0A024R2Y2;Q12893	B2RAF3;A0A024R2Y2;Q12893	Transmembrane protein 115	TMEM115
27.6751	28.5729	28.6701	29.2628	28.5527	28.9521	28.7546	28.7488	28.3042	3	37.3	21.768	3543700000	18	A0A024R324;P61586;B4DKN9;A0A0B6XK12;Q9BVT0;C9JNR4;C9JX21;C9JRM1	A0A024R324;P61586;B4DKN9;A0A0B6XK12;Q9BVT0;C9JNR4;C9JX21	Transforming protein RhoA	RHOA;ARHA
29.384	29.3334	29.6047	29.5681	29.4385	29.6219	29.4464	29.4318	29.5123	8	22	46.51	6268500000	62	A0A024R325;Q96I99;Q3ZCW5;E9PDQ8;B7Z2D5;H0Y852;Q9Y436	A0A024R325;Q96I99;Q3ZCW5;E9PDQ8;B7Z2D5	Succinyl-CoA ligase subunit beta;Succinyl-CoA ligase [GDP-forming] subunit beta, mitochondrial	SUCLG2
28.1536	30.0677	30.0841	29.5387	30.7831	30.8473	29.96	30.4944	30.89	2	7.6	17.553	10691000000	27	A0A024R326;Q6IPI1;P47914	A0A024R326;Q6IPI1;P47914	60S ribosomal protein L29	RPL29
NaN	NaN	NaN	NaN	NaN	NaN	25.5813	NaN	25.2186	4	5.5	77.504	269400000	11	A0A024R328;Q05655;B4DFV1;C9JZU8;C9J9P1;C9K0E3	A0A024R328;Q05655;B4DFV1	Protein kinase C delta type;Protein kinase C delta type;Protein kinase C delta type regulatory subunit;Protein kinase C delta type catalytic subunit;Protein kinase C	PRKCD
25.6225	25.8714	26.0979	25.9186	26.1223	26.7056	26.4192	NaN	NaN	4	30.9	23.743	570600000	13	A0A024R332;Q6I9Y2;A0A024R341;H7C5E3;F8WF22	A0A024R332;Q6I9Y2;A0A024R341	THO complex subunit 7 homolog	NIF3L1BP1;THOC7
29.4173	29.7866	29.9345	29.9516	29.8044	29.9245	29.801	29.7938	30.0074	10	40.9	35.079	7985600000	87	A0A024R333;Q6UXN9;C9J355;C9JBU3	A0A024R333;Q6UXN9	WD repeat-containing protein 82	TMEM113;WDR82
28.27	28.3534	28.4171	28.4536	28.7596	28.652	28.5646	28.5802	28.6969	7	29.5	40.063	3256500000	57	A0A024R355;Q8IV48;B4DWF4;E5RIV7	A0A024R355;Q8IV48;B4DWF4	3-5 exoribonuclease 1	THEX1;ERI1
27.633	27.4902	27.6306	27.8931	27.8339	27.8872	27.5904	27.7875	27.1128	9	12	122.84	1783000000	15	A0A024R370;P82094;B4DQY7;F8WF45;Q6PII6	A0A024R370;P82094;B4DQY7	TATA element modulatory factor	TMF1
30.2741	30.2208	30.4754	30.4764	30.3455	30.4648	30.3168	30.2703	30.4285	7	31.1	30.767	11573000000	49	B4DL49;A0A024R374;P07858;A8K2H4;E9PR54;E9PJ67;Q5HYG5;E9PCB3;E9PKQ7;E9PNL5;E9PHZ5;E9PLY3;E9PSG5;E9PQM1;Q6LAF9;B4DMY4;B3KUJ8;E9PS78;R4GMQ5	B4DL49;A0A024R374;P07858;A8K2H4;E9PR54;E9PJ67;Q5HYG5;E9PCB3;E9PKQ7;E9PNL5;E9PHZ5;E9PLY3;E9PSG5;E9PQM1	Cathepsin B;Cathepsin B light chain;Cathepsin B heavy chain	CTSB;DKFZp686N0152
30.0562	30.1472	30.1831	30.3561	30.2886	30.2976	30.1237	29.9662	30.0728	10	43.3	39.315	10082000000	66	A0A024R388;Q6MZT3;Q9NXG2;O60362;H3BNW0;B4DFY9	A0A024R388;Q6MZT3;Q9NXG2;O60362;H3BNW0	THUMP domain-containing protein 1	THUMPD1;DKFZp686C1054;44M2.1
31.2682	31.4848	31.5262	31.4449	31.3148	31.4333	31.8358	31.7289	31.6924	13	58.1	35.33	26177000000	111	A0A024R3C3;A0A024R394;Q9UHD1;E9PHZ2;Q9NZ93;E9PPQ5;E9PIZ4;E9PSD5;E9PL00;E9PIF7	A0A024R3C3;A0A024R394;Q9UHD1;E9PHZ2	Cysteine and histidine-rich domain-containing protein 1	CHORDC1
31.0324	31.2441	31.2744	31.3245	31.2697	31.3573	31.2276	31.1797	31.256	20	37.3	80.521	21280000000	131	F8W7U8;A0A024R395;P49959;Q05D78;F5GXT0;Q9BS79;F5H742;A0A0S2Z438;F5H256	F8W7U8;A0A024R395;P49959;Q05D78	Double-strand break repair protein MRE11A	MRE11A
26.3855	25.9041	25.8309	26.5493	26.0538	26.2127	26.452	26.3445	26.0051	7	34.9	17.855	657620000	21	E9PM04;A0A024R3A2;Q9BTE7;B4DP84;E9PLH8;E9PM78;H0YD80;E9PLS2;E9PQV9;H0YCN4;H0Y9C5;H0Y907;B4DH26;Q92564	E9PM04;A0A024R3A2;Q9BTE7;B4DP84	DCN1-like protein;DCN1-like protein 5	DCUN1D5
NaN	NaN	NaN	NaN	NaN	NaN	NaN	NaN	24.3207	2	2.6	106.57	38951000	4	A0A024R3A6;Q8IY63	A0A024R3A6;Q8IY63	Angiomotin-like protein 1	AMOTL1
NaN	NaN	NaN	NaN	NaN	NaN	26.3237	26.6029	NaN	3	11.3	32.287	334380000	6	A0A024R3A8;Q9BRL6;A4D2F7	A0A024R3A8;Q9BRL6	Serine/arginine-rich splicing factor 8	SRP46;SRSF8
25.4713	NaN	NaN	NaN	NaN	NaN	25.6192	NaN	25.6807	3	14.2	36.438	209510000	6	B4DDL6;C9JEX3;A0A024R3B7;A8K5G2;Q13614	B4DDL6;C9JEX3;A0A024R3B7;A8K5G2;Q13614	Myotubularin-related protein 2	MTMR2
27.5317	27.3878	27.4463	27.5981	27.6315	27.5535	27.5712	27.2491	26.8168	5	13.2	58.572	1513600000	15	A0A024R3C4;Q7Z4H8;B2R8W4;H0YEM3	A0A024R3C4;Q7Z4H8;B2R8W4	KDEL motif-containing protein 2	KDELC2
27.4728	27.8969	27.7631	27.7551	27.7442	27.8655	27.9321	27.8266	28.0553	10	19.2	77.667	1954300000	23	A0A024R3D4;Q8ND24;E9PN76;E9PRE9	A0A024R3D4;Q8ND24;E9PN76	RING finger protein 214	DKFZp547C195;RNF214
31.5692	31.087	31.3262	31.5248	31.1409	31.2407	31.1317	31.0785	31.1239	14	36.4	62.696	21491000000	55	B4DJX1;Q86YI5;A0A024R3D8;P10515;E9PEJ4;H0YDD4;B4DS43;B4DLQ2;Q01991;Q16791;B4E1P6	B4DJX1;Q86YI5;A0A024R3D8;P10515;E9PEJ4;H0YDD4;B4DS43;B4DLQ2	Acetyltransferase component of pyruvate dehydrogenase complex;Dihydrolipoyllysine-residue acetyltransferase component of pyruvate dehydrogenase complex, mitochondrial	DLAT
NaN	NaN	NaN	NaN	24.9642	NaN	NaN	NaN	NaN	2	9	21.896	241600000	9	A0A024R3E0;Q96KJ8;B0YJ28;Q14116	A0A024R3E0;Q96KJ8;B0YJ28;Q14116	Interleukin-18	IL18
NaN	27.7501	27.3943	26.9714	27.0441	27.5312	27.5156	27.4902	27.8883	8	10.3	144.74	1530800000	9	A0A024R3F4;A0A024R3H6;Q86UU1;Q5W9G0;Q96D60;B0YJ65;Q6ZUD6;A0A087WZL0;Q8NC75;B4DIX4;Q96SW0;B7Z2B9;A0A087WTZ7;A0A087WXY7;Q68CT9;B3KQD4;B4DK17	A0A024R3F4;A0A024R3H6;Q86UU1;Q5W9G0;Q96D60;B0YJ65;Q6ZUD6;A0A087WZL0;Q8NC75	Pleckstrin homology-like domain family B member 1	PHLDB1;KIAA0638
27.678	27.6952	27.7015	27.8326	27.8098	28.0012	27.6077	27.6069	27.6533	8	20.3	71.607	1866200000	36	A0A024R3I5;P43121;B3KXZ9;B2R642;A8K6A6	A0A024R3I5;P43121;B3KXZ9;B2R642;A8K6A6	Cell surface glycoprotein MUC18	MCAM
NaN	NaN	NaN	NaN	NaN	NaN	NaN	NaN	27.0065	2	15.2	14.562	599010000	2	E9PL33;Q59EJ1;E9PM05;E9PS58;E9PK61;A0A024R3I8;O14681;E9PQN7;A0A087WV44;E9PLB8	E9PL33;Q59EJ1;E9PM05;E9PS58;E9PK61;A0A024R3I8;O14681;E9PQN7;A0A087WV44;E9PLB8	Etoposide-induced protein 2.4 homolog	EI24
28.2594	28.1669	27.8301	28.5445	28.1723	28.5856	27.4888	27.705	27.8524	7	8	80.428	2415200000	29	A0A024R3J7;P46977;A0A0C4DH80;E9PN73;E9PI32	A0A024R3J7;P46977	Dolichyl-diphosphooligosaccharide--protein glycosyltransferase subunit STT3A	hCG_2032701;STT3A
24.7958	25.1572	25.1607	24.8366	25.5982	24.7858	25.2557	25.308	25.3577	5	15.4	42.233	317970000	17	A0A024R3K2;Q96CM3;B4DUN4	A0A024R3K2;Q96CM3;B4DUN4	RNA pseudouridylate synthase domain-containing protein 4	RPUSD4
25.1639	NaN	26.841	NaN	NaN	NaN	NaN	NaN	25.3191	5	6.1	139	286270000	5	A0A024R3K9;A0A024R3N2;Q6P4R8;E9PQ59;B4DSL1;E9PJU3;E9PJG2	A0A024R3K9;A0A024R3N2;Q6P4R8	Nuclear factor related to kappa-B-binding protein	NFRKB
28.7445	28.5595	29.0379	29.0489	28.3321	28.7076	29.2706	28.917	28.6185	4	17.6	39.079	4030800000	20	E9PMJ2;J3KP39;A0A024R3L8;Q9BPY3;E9PIM5;G3V179;E9PMW3	E9PMJ2;J3KP39;A0A024R3L8;Q9BPY3;E9PIM5;G3V179	Protein FAM118B	FAM118B;FLJ21103
26.6565	26.0086	26.053	25.994	25.7286	25.9145	NaN	25.7698	25.9841	3	14.3	39.154	559860000	5	A0A024R3L9;Q4G0F5	A0A024R3L9;Q4G0F5	Vacuolar protein sorting-associated protein 26B	VPS26B
29.7423	29.945	29.9372	29.9577	29.987	30.0714	29.8564	29.9956	29.9058	8	31.6	25.697	8577000000	56	A0A024R3M1;Q9P016	A0A024R3M1;Q9P016	Thymocyte nuclear protein 1	THYN1
25.7963	25.9977	26.1928	25.3991	25.6282	25.6153	25.54	26.1146	26.0835	2	5.2	78.764	509830000	8	B4E3I5;A0A024R3N3;A0A140VJE9;Q06481;E9PQS3;B4DTV1	B4E3I5;A0A024R3N3;A0A140VJE9;Q06481;E9PQS3;B4DTV1	Amyloid-like protein 2	APLP2
29.1878	29.0561	29.2741	29.4188	29.1679	29.3183	29.3496	29.1667	29.2131	11	33.5	60.593	5334200000	58	A0A024R3P9;Q9H3P7	A0A024R3P9;Q9H3P7	Golgi resident protein GCP60	ACBD3
31.7864	31.5042	31.4108	31.8882	31.6653	31.3269	31.1498	31.1684	31.1236	11	79.6	20.697	25054000000	62	A0A024R3Q3;P84077;B4DJC8;B4DN70;B4DEB9;A0A024R0Y6;P61204;F5H423;F5H0C7;B4E190;F5H1V1;F5H6T5;F8WDB3;H0YGG7	A0A024R3Q3;P84077;B4DJC8;B4DN70;B4DEB9;A0A024R0Y6;P61204;F5H423	ADP-ribosylation factor 1;ADP-ribosylation factor 3	ARF1;ARF3
27.6036	27.0741	27.142	27.3271	27.0401	26.965	27.0744	27.0139	27.0901	4	32	15.128	1261100000	16	A0A024R3R0;Q7Z7F7;X6R631;X6RIW1	A0A024R3R0;Q7Z7F7;X6R631	39S ribosomal protein L55, mitochondrial	MRPL55
26.2463	26.4595	26.6204	26.8625	26.5671	26.6455	26.5839	26.4901	26.6917	8	9	147.81	844240000	25	A0A024R3R1;Q4LE39;X6RCR8;A0A024R3V1;A0PJ81;H0Y7Y8;H7C5R6	A0A024R3R1;Q4LE39;X6RCR8;A0A024R3V1	AT-rich interactive domain-containing protein 4B	ARID4B
31.1661	31.0837	31.2504	31.1722	31.2647	31.4633	31.2889	31.2825	31.2208	7	14	70.729	21256000000	73	A0A024R3R5;Q14739;C9JXK0;B4E0Z3	A0A024R3R5;Q14739;C9JXK0	Lamin-B receptor	LBR
26.3362	26.2054	26.5488	26.4301	26.2373	26.4994	26.5032	26.2717	26.3084	6	23.2	35.525	726470000	26	B4DED1;Q5T7A2;B4DVB7;A0A024R3S3;Q8NI60;B4DU83;B4DN23;A1L377	B4DED1;Q5T7A2;B4DVB7;A0A024R3S3;Q8NI60;B4DU83;B4DN23	Atypical kinase ADCK3, mitochondrial	CABC1;ADCK3
33.9848	34.0022	34.0416	33.9888	34.0016	34.1282	34.1745	34.1342	34.0901	45	49.5	113.08	150710000000	399	A0A024R3T8;P09874;B4E0E1;B2R5W3;Q05D33;Q6PJL0;Q5VX84;Q5VX85;Q96P95	A0A024R3T8;P09874;B4E0E1;B2R5W3	Poly [ADP-ribose] polymerase 1	PARP1
27.7595	27.5625	27.287	NaN	NaN	27.3789	27.7518	28.3224	28.1248	7	20.3	76.034	1822000000	19	C9JR56;B3KPQ9;A0A024R3U6;Q59FT3;Q9UPW6;Q9H726;A0A024R2H1;Q01826	C9JR56;B3KPQ9;A0A024R3U6;Q59FT3;Q9UPW6	DNA-binding protein SATB;DNA-binding protein SATB2	SATB2
26.6849	NaN	26.455	26.7029	NaN	NaN	NaN	NaN	NaN	3	12	32.544	445250000	3	A0A024R3U8;Q8WWC4;H7C0V0	A0A024R3U8;Q8WWC4	Uncharacterized protein C2orf47, mitochondrial	FLJ22555;C2orf47
26.1219	26.0888	26.3045	26.2997	26.2308	26.2788	25.946	26.0514	26.1509	3	15.5	23.902	630090000	16	A0A0A1HAV9;Q53GC2;A0A024R3U9;P20338;A0A087WYT5;A0A023HJ61	A0A0A1HAV9;Q53GC2;A0A024R3U9;P20338;A0A087WYT5	Ras-related protein Rab-4A	RAB4A
25.4231	NaN	25.4458	24.9608	NaN	26.2282	25.4671	25.083	25.8234	4	10.2	54.945	423540000	11	B8ZZZ7;A0A024R3V0;Q9NUQ6;C9JW67;F8W6C2	B8ZZZ7;A0A024R3V0;Q9NUQ6;C9JW67;F8W6C2	SPATS2-like protein	SPATS2L;DNAPTP6
25.5891	NaN	NaN	25.7809	25.2509	NaN	NaN	25.5357	25.4669	2	32.5	9.0341	343550000	9	C9K058;A0A024R3V4;B4DN80;Q9H2H8;F8WC82;C9J4N2;Q86UR0;A0A0S2Z5X8;B8ZZ77;A0A0S2Z5A8;H7BZ14	C9K058;A0A024R3V4;B4DN80;Q9H2H8;F8WC82;C9J4N2;Q86UR0;A0A0S2Z5X8;B8ZZ77;A0A0S2Z5A8;H7BZ14	Peptidyl-prolyl cis-trans isomerase;Peptidyl-prolyl cis-trans isomerase-like 3	PPIL3
27.7559	27.3753	27.2678	27.2329	27.3591	27.5337	27.3594	27.0123	27.3784	3	16.6	37.029	1452300000	16	Q658J0;A0A024R3V5;A0A024R3V7;Q9GZT8;C9JN42;B8ZZI0;E7EXA3;Q6X734	Q658J0;A0A024R3V5;A0A024R3V7;Q9GZT8	NIF3-like protein 1	DKFZp762L015;NIF3L1
NaN	25.0775	NaN	NaN	24.9495	NaN	NaN	NaN	NaN	2	13.9	26.392	195450000	10	A0A0A0MRI7;H7C484;A0A024R3V6;Q9H2C2;H7C0E7	A0A0A0MRI7;H7C484;A0A024R3V6;Q9H2C2;H7C0E7	Protein ARV1	ARV1
30.0125	30.2525	30.4814	30.3409	30.3934	30.3478	30.0096	30.2214	30.3668	11	46.2	33.112	10898000000	97	A0A024R3V8;Q99598;C4P0D6;C4P0D8;C4P0D4;Q5VVQ1;Q7Z3N9	A0A024R3V8;Q99598;C4P0D6;C4P0D8;C4P0D4	Translin-associated protein X	TSNAX;DISC1
26.8506	27.6376	27.8855	27.3053	28.5115	28.1101	27.5013	27.9913	28.077	3	17.2	16.298	1996600000	17	A0A024R3W2;Q15388	A0A024R3W2;Q15388	Mitochondrial import receptor subunit TOM20 homolog	TOMM20
27.8784	NaN	26.8686	27.9523	NaN	NaN	27.7079	27.2405	27.4911	6	26.3	34.87	1719400000	16	A0A024R3W4;O95749;C9J7M1;C9J6G3	A0A024R3W4;O95749;C9J7M1;C9J6G3	Geranylgeranyl pyrophosphate synthase	GGPS1
33.3445	33.1969	33.0414	32.9733	32.8953	33.0082	33.2861	33.266	33.2313	8	59.1	24.763	79903000000	77	A0A024R3W7;P24534;A4D1M6;F2Z2G2;C9JZW3;F8WF65	A0A024R3W7;P24534;A4D1M6	Elongation factor 1-beta	EEF1B2;LOC392793
35.8953	35.9923	36.0397	36.0976	36.0492	36.1239	36.1978	36.0743	36.134	44	73.6	61.054	612250000000	673	A0A024R3X4;P10809;B7Z597;B3GQS7;B7Z4F6;B7Z5E7;B7Z532;Q53SE2;E7ESH4;E7EXB4;B9VPB4;B9VP19;A0A0S2Z415;C9JL25;C9JL19;C9JCQ4;C9J0S9	A0A024R3X4;P10809;B7Z597;B3GQS7;B7Z4F6;B7Z5E7	60 kDa heat shock protein, mitochondrial	HSPD1
28.3059	27.8423	28.0542	28.2792	27.7499	28.0372	28.1261	28.0086	27.848	8	42.3	22.042	2333700000	17	E9PHS0;Q53TN2;B2R602;A0A024R3Z5;O43813;Q6FHH6;F8WDS9;B4DGM7	E9PHS0;Q53TN2;B2R602;A0A024R3Z5;O43813;Q6FHH6;F8WDS9;B4DGM7	LanC-like protein 1	LANCL1
29.8008	29.892	29.9197	29.7446	29.6545	29.6395	29.8897	29.8626	29.9679	10	34.3	30.768	7930100000	66	D3DN77;A0A024R3Z6;Q53FN7;Q7L1Q6;B3KU41;C9IZ80;H0Y503;Q3LIC9;C9JFN4	D3DN77;A0A024R3Z6;Q53FN7;Q7L1Q6;B3KU41;C9IZ80	Basic leucine zipper and W2 domain-containing protein 1	hCG_2022736;BZW1
26.3052	26.0047	26.0287	26.1333	26.2421	26.2532	25.7874	25.7376	25.9306	5	26.8	23.465	582970000	17	E7ETB7;E7EQ06;A0A024R3Z9;Q6NVI2;A0A0A0MS31;B6CGU5;A0A024R3Z8;Q14790;B5BU46;C3S3G0;E7EQ01;E7EVN1;K4FGA0;H7BZM4;C9JB29;H7C0E2	E7ETB7;E7EQ06;A0A024R3Z9;Q6NVI2;A0A0A0MS31;B6CGU5;A0A024R3Z8;Q14790;B5BU46;C3S3G0;E7EQ01;E7EVN1;K4FGA0	Caspase-8;Caspase-8 subunit p18;Caspase-8 subunit p10	CASP8;hCG_16983;Casp8
NaN	27.8138	NaN	NaN	NaN	27.7932	27.9489	NaN	28.3553	4	16.1	44.693	2011500000	8	C9JG97;A0A024R410;C9JEH3;Q13685;C9JTS3;Q59EM1;H7C0R2	C9JG97;A0A024R410;C9JEH3;Q13685;C9JTS3;Q59EM1	Angio-associated migratory cell protein	AAMP
27.8798	28.1232	28.0952	28.345	28.5781	NaN	28.3745	28.0273	28.0269	6	15.8	65.971	2505700000	8	A0A024R411;Q13416;B4DYU9;C9JK08;B8ZZ80	A0A024R411;Q13416;B4DYU9	Origin recognition complex subunit 2	ORC2L;ORC2
27.9967	27.9744	28.0856	28.1614	28.1549	28.2053	28.0555	27.9374	28.0433	3	34.7	11.402	2356700000	17	A0A024R413;O43676;C9JKQ2	A0A024R413;O43676;C9JKQ2	NADH dehydrogenase [ubiquinone] 1 beta subcomplex subunit 3	NDUFB3
25.1849	25.3096	NaN	25.2334	24.9953	25.0007	NaN	NaN	NaN	2	8.1	42.875	183480000	4	A0A024R415;Q8N490	A0A024R415;Q8N490	Probable hydrolase PNKD	PNKD
28.5316	28.3629	28.451	28.2725	28.1144	28.0972	28.5421	28.7308	28.6609	9	16.1	81.434	3055000000	22	B3KMB8;A0A024R419;Q9NYY8	B3KMB8;A0A024R419;Q9NYY8	FAST kinase domain-containing protein 2	KIAA0971;FASTKD2
NaN	NaN	24.9658	24.8565	NaN	NaN	NaN	NaN	24.5744	4	9.8	87.282	312530000	7	B4DYN3;B3KPP7;A8K140;A0A024R438;Q7Z3C6;H7C152;H7C1G6	B4DYN3;B3KPP7;A8K140;A0A024R438;Q7Z3C6;H7C152	Autophagy-related protein 9A	ATG9A
29.9378	30.0456	29.9765	29.9653	29.4551	29.7174	29.9359	29.7712	29.703	17	47.6	51.998	8161100000	58	A0A024R442;Q53SB6;E7ETB3;Q9ULA0;B7Z7F0;Q9BSS9;E7EMB6;A0A024R443;Q9HAC6;F8WAN0;B7Z822;C9JBE1;B9ZVU2;E7EPX3;E5RJ35;C9J1E2;C9JRG3	A0A024R442;Q53SB6;E7ETB3;Q9ULA0;B7Z7F0;Q9BSS9;E7EMB6;A0A024R443	Aspartyl aminopeptidase	DNPEP
27.705	28.0863	28.1456	27.9326	27.979	28.392	28.2554	28.2164	28.1734	12	20.1	80.926	2392400000	49	A0A024R464;Q9H8Y5;B8ZZS4;B4DZT1;C9JS61;C9K022;B4E0V1;C9JQZ3	A0A024R464;Q9H8Y5;B8ZZS4;B4DZT1	Ankyrin repeat and zinc finger domain-containing protein 1	ANKZF1
27.9117	27.5115	27.8978	28.0678	27.9112	27.7948	27.8202	27.6619	27.7255	6	22.2	47.535	1982000000	24	Q53EX1;A8JZZ8;A0A024R467;Q9Y276;C9J1S9;C9J8G3;Q53RT4;C9JAS4;H7BZF6;A0A0S2Z3G6;H7C492	Q53EX1;A8JZZ8;A0A024R467;Q9Y276;C9J1S9;C9J8G3;Q53RT4	Mitochondrial chaperone BCS1	BCS1L
27.8419	27.7007	28.0319	28.0277	NaN	NaN	NaN	NaN	28.1796	3	4.5	113.24	2610600000	5	A0A024R468;A6NN50;O75147;A8MSZ8	A0A024R468;A6NN50;O75147	Obscurin-like protein 1	CHPF;OBSL1
27.6325	28.0731	28.3359	28.0395	28.3324	28.3697	28.0275	28.2685	28.3433	7	31.3	26.424	2535800000	35	J3KQ34;A0A024R471;Q9H9Q2;B3KW51;B3KV02;A0A024R478;J3QT73;A0A087X1P5;Q53GQ2;J3KQ41	J3KQ34;A0A024R471;Q9H9Q2;B3KW51;B3KV02;A0A024R478;J3QT73;A0A087X1P5;Q53GQ2	COP9 signalosome complex subunit 7b	COPS7B
28.5065	28.5819	28.4811	28.3944	28.5646	28.4289	28.2932	28.4765	28.5234	10	37.7	37.535	3128700000	30	A0A024R473;Q9H9J2	A0A024R473;Q9H9J2	39S ribosomal protein L44, mitochondrial	MRPL44
29.6905	29.4889	29.6161	29.607	29.4479	29.4012	29.5859	29.6003	29.5312	18	29.4	88.929	6605800000	62	A0A024R475;Q13618;Q53S54;B7Z600;A0A087WTG3;H7C399;A0A087X1R9;H7C1L6	A0A024R475;Q13618;Q53S54;B7Z600;A0A087WTG3	Cullin-3	CUL3
26.8832	NaN	26.6413	26.8647	26.9014	NaN	27.1641	NaN	NaN	4	12.4	46.291	921140000	9	A0A024R482;Q96IJ6;A0A087WUI8;A0A0U1RRC2;B4DJR0;C9J255;F8WD54	A0A024R482;Q96IJ6;A0A087WUI8;A0A0U1RRC2;B4DJR0;C9J255;F8WD54	Mannose-1-phosphate guanyltransferase alpha	GMPPA
27.2845	27.8111	27.9589	28.0388	28.0499	28.2641	28.2184	27.6852	27.983	3	11.7	41.216	2163600000	23	Q9H8N9;A0A024R488;Q8IWB7;C9JJ54	Q9H8N9;A0A024R488;Q8IWB7;C9JJ54	WD repeat and FYVE domain-containing protein 1	WDFY1
30.1234	29.9454	30.2187	30.1744	29.9241	29.7038	30.049	29.9998	30.003	11	25.8	39.869	9189500000	59	A0A024R496;Q9Y376;A0A087X0K1;Q7Z4X0;B7ZBJ4;Q5TAW7;A0A024RDT3;Q9H9S4	A0A024R496;Q9Y376;A0A087X0K1;Q7Z4X0	Calcium-binding protein 39	CAB39
31.293	31.4417	31.3472	31.7472	31.7298	31.8418	31.4051	31.4492	31.5338	28	51.9	79.222	26180000000	160	B3KN05;B2RBE0;A0A024R497;O95573;B3KMA6;Q6PIM8;F5GWH2;F5H062	B3KN05;B2RBE0;A0A024R497;O95573;B3KMA6	Long-chain-fatty-acid--CoA ligase 3	ACSL3
33.9469	33.8277	33.8391	33.8354	33.837	33.9558	34.1522	34.1175	34.0293	24	39	58.554	140790000000	226	B3KM80;Q6ZS99;A0A024R4A0;P19338;B3KTP9;H7BY16;Q9BQ02	B3KM80;Q6ZS99;A0A024R4A0;P19338;B3KTP9;H7BY16	Nucleolin	NCL
28.9165	28.8558	28.8261	28.8085	28.8194	28.7256	29.0637	28.911	28.9216	15	20.9	149.94	4134900000	59	A0A024R4A5;Q6Y7W6;I1E4Y6;B4DRT8;E7ESB6;C9JHW1;B4DZM1;C9JH78;F8WCD5;C9JPV7;C9JXQ0;C9J0V6;C9JHT0;C9JRZ2;C9IYH5;B4DLU7;C9JW88;C9JH18	A0A024R4A5;Q6Y7W6;I1E4Y6;B4DRT8;E7ESB6;C9JHW1;B4DZM1	PERQ amino acid-rich with GYF domain-containing protein 2	TNRC15;GIGYF2
NaN	NaN	NaN	NaN	NaN	NaN	NaN	NaN	24.2007	2	20.5	37.267	148880000	10	B4E185;B4DMA5;B3KRS6;A0A0S2Z4Y2;B4DVS7;Q96BA2;A0A024R4B2;O00506;Q5CZ67;C9JDH9;C9J6L2;C9JCC0;C9J232;H7C279;C9JJV0	B4E185;B4DMA5;B3KRS6;A0A0S2Z4Y2;B4DVS7;Q96BA2;A0A024R4B2;O00506;Q5CZ67;C9JDH9;C9J6L2;C9JCC0;C9J232;H7C279	Serine/threonine-protein kinase 25	STK25;DKFZp686J1430
29.4061	29.2636	29.509	29.6163	29.6357	29.6045	29.2754	29.302	29.2744	12	46.9	40.676	6087700000	67	Q7Z518;A0A087WXC5;A0A024R4B3;O95299;Q53SW4;E7ESZ7;A8K413;C9J6X0;Q8N1B9;Q59FM0;H7C2W5;H7C1Y7;H7C2X4	Q7Z518;A0A087WXC5;A0A024R4B3;O95299;Q53SW4;E7ESZ7;A8K413;C9J6X0;Q8N1B9;Q59FM0	NADH dehydrogenase [ubiquinone] 1 alpha subcomplex subunit 10, mitochondrial	NDUFA10
26.3116	27.3896	26.4365	26.4723	26.7078	26.4956	25.7602	26.0105	25.7682	6	13.6	43.661	759440000	8	A0A024R4B7;Q9H3M7;B1ALI9;B4DVM7;B4DVR8	A0A024R4B7;Q9H3M7;B1ALI9;B4DVM7	Thioredoxin-interacting protein	TXNIP
26.5826	26.6588	26.6381	NaN	26.748	26.6686	26.6313	26.7108	26.6889	5	17.3	46.189	868560000	13	E9PHH9;Q53F76;A0A024R4C1;Q9BUI4;Q9BT08	E9PHH9;Q53F76;A0A024R4C1;Q9BUI4;Q9BT08	DNA-directed RNA polymerase III subunit RPC3	POLR3C
28.8573	28.8474	29.0628	29.0067	28.8213	28.9667	28.855	28.8831	29.0976	4	32.4	19.344	4302700000	25	E9PGT6;B2R8N1;A0A024R4D1;Q99627;H7C3S9;F8WEF2;B4DFF9	E9PGT6;B2R8N1;A0A024R4D1;Q99627;H7C3S9	COP9 signalosome complex subunit 8	COPS8
27.2066	27.3482	27.3224	27.6695	27.7982	27.8875	27.2123	27.0049	27.2357	5	25.8	31.92	1513500000	10	Q53GL1;A0A024R4E1;Q9HAN9;B1AN62	Q53GL1;A0A024R4E1;Q9HAN9	Nicotinamide-nucleotide adenylyltransferase;Nicotinamide/nicotinic acid mononucleotide adenylyltransferase 1	NMNAT1
30.4532	30.2624	30.5977	30.6768	30.6681	30.7483	30.7797	30.9242	30.7679	8	47.7	26.743	14287000000	66	A0A087WX29;A0A0A0N0L3;A0A024R4E2;Q13148;B4DRW3;B1AKP7;G3V162;A0A087X260;A0A087WYY0;A0A087WXQ5;K7EJM5;A0A087WV68;A0A0A0N0N3;A0A0A0N0M3;K7EN94;A0A087WXV3;A0A087WW61;A0A087WX67;A0A1W2PNU8;A0A087WTZ4;K7EL26;K7EJ99;A0A0A0MSV7;A0A087WYE7;A0A087WZC9	A0A087WX29;A0A0A0N0L3;A0A024R4E2;Q13148;B4DRW3;B1AKP7;G3V162;A0A087X260;A0A087WYY0;A0A087WXQ5;K7EJM5;A0A087WV68;A0A0A0N0N3;A0A0A0N0M3;K7EN94;A0A087WXV3	TAR DNA-binding protein 43	TARDBP;TDP43
27.0019	26.6146	26.8755	26.79	27.0081	26.664	27.0564	26.0784	26.6711	4	9.9	38.766	963420000	13	B0AZM0;Q6FG44;Q6FG22;B2R776;B2R615;A8K1X9;A0A024R4E3;Q13303;Q5TG81;Q5TG80	B0AZM0;Q6FG44;Q6FG22;B2R776;B2R615;A8K1X9;A0A024R4E3;Q13303;Q5TG81;Q5TG80	Voltage-gated potassium channel subunit beta-2	KCNAB2
31.1888	31.2755	31.2682	31.1769	31.1849	31.3066	31.1667	31.3394	31.2627	35	34	141.44	21181000000	212	A0A024R4E5;B2R5V9;Q00341;H0Y394;B4DKR8;Q96CF6;H7C0A4;Q6ZS03;C9JIZ1;C9J5E5;C9JZI8;C9JHS7;C9JHZ8;C9JES8;Q5HYC5;Q2HJC8;C9JT62;C9JK79;Q6ZN49;C9JBS3;C9JEJ8;C9JHN6;H7BZC3;C9JMQ6;C9JQ82;H7C3D0;H7C2D1;C9JHS9;C9J739	A0A024R4E5;B2R5V9;Q00341;H0Y394	Vigilin	HDLBP
36.6809	36.6036	36.721	36.5885	36.6442	36.7421	36.654	36.6594	36.7411	29	75.6	47.168	958310000000	743	A0A024R4F1;P06733;E2DRY6;K7EM90;A4UCS8;A4QMW8;D3DTL4;Q9NPL4	A0A024R4F1;P06733;E2DRY6	Alpha-enolase;Enolase	ENO1
29.2066	29.08	29.091	29.0773	29.1935	29.1652	29.466	29.6332	29.2915	14	17.3	123.63	5392900000	77	A0A024R4F4;Q308M6;M0R2B7;P28340;M0QZR8;Q59FA0;M0QZB4;M0QXE6;M0QXQ2;M0R3H8	A0A024R4F4;Q308M6;M0R2B7;P28340;M0QZR8;Q59FA0	DNA polymerase;DNA polymerase delta catalytic subunit	POLD1
31.2928	31.3543	31.1938	31.1806	31.2469	31.2409	31.278	31.1587	31.1978	22	45.5	63.472	21166000000	156	A0A024R4G1;Q8N1G4	A0A024R4G1;Q8N1G4	Leucine-rich repeat-containing protein 47	LRRC47
29.0301	28.838	28.929	28.9531	28.731	29.0341	29.0492	28.9608	28.9447	14	29.6	83.549	4347000000	49	A0A024R4H0;Q02809;B4DGN8;B2R5M9;B4DHT1;Q5JXB7;Q5JXB8	A0A024R4H0;Q02809;B4DGN8;B2R5M9	Procollagen-lysine,2-oxoglutarate 5-dioxygenase 1	PLOD1
27.6727	27.213	27.0567	27.3362	27.211	27.2593	27.317	26.6071	27.0026	5	3.6	183.9	1314300000	14	A0A024R4H4;Q4R9M7;Q4R9M8;A0A087WWA3;Q4R9M9;O60333;A0A0U1RQL3;B4DMF3	A0A024R4H4;Q4R9M7;Q4R9M8;A0A087WWA3;Q4R9M9;O60333;A0A0U1RQL3;B4DMF3	Kinesin-like protein;Kinesin-like protein KIF1B	KIF1B;KIF1Bbeta
29.4875	29.333	29.4034	29.4555	28.8862	29.0037	29.192	29.1287	28.9208	9	53.7	21.494	5242500000	57	A0A024R4I7;Q8WZA0;K7ES95	A0A024R4I7;Q8WZA0;K7ES95	Protein LZIC	LZIC
35.282	35.4518	35.31	35.4519	35.3902	35.5564	35.3701	35.4015	35.5147	17	66.6	31.969	384450000000	221	Q0QF37;Q75MT9;Q6FHZ0;A0A024R4K3;P40926;G3XAL0;B3KTM1	Q0QF37;Q75MT9;Q6FHZ0;A0A024R4K3;P40926;G3XAL0;B3KTM1	Malate dehydrogenase;Malate dehydrogenase, mitochondrial	MDH2
32.8359	33.3256	33.3582	33.435	33.4716	33.3542	33.151	33.3829	33.2348	22	53.1	22.591	88076000000	212	A0A024R4M0;P46781;B5MCT8;C9JM19;B7Z732;A5D904;F2Z3C0;A8MXK4	A0A024R4M0;P46781;B5MCT8;C9JM19;B7Z732;A5D904	40S ribosomal protein S9	RPS9
29.3243	29.8994	29.7114	29.7048	29.826	29.7514	29.526	29.5022	29.7548	13	53.5	35.932	7140200000	62	A0A024R4M8;Q8NBN7;G8JLA1;K7EQB5;K7ERV1	A0A024R4M8;Q8NBN7;G8JLA1	Retinol dehydrogenase 13	RDH13
26.1627	26.3527	NaN	26.4346	26.2569	26.5545	NaN	26.5651	26.4698	9	29.4	33.652	626450000	14	A0A024R4N9;Q9BSV6;B0V3J0;A9C4B9;A0A0G2JNK5;B4DT51;E7EQB3	A0A024R4N9;Q9BSV6;B0V3J0;A9C4B9;A0A0G2JNK5;B4DT51;E7EQB3	tRNA-splicing endonuclease subunit Sen34	TSEN34
24.4152	24.3352	24.2745	24.0496	24.3852	NaN	24.1905	24.4114	24.0178	3	14.1	35.132	156810000	10	A0A024R4P4;Q53F81;A0A024R4S5;Q8N0Y2;K7EMV5;K7ELZ3;K7ESL2;K7EJH4;K7EJ91	A0A024R4P4;Q53F81;A0A024R4S5;Q8N0Y2	Zinc finger protein 444	ZNF444
31.5828	32.1275	31.7823	31.6203	31.6122	31.756	31.8905	31.9604	31.7689	9	63.5	22.391	31421000000	95	M0R0F0;Q53G25;A0A024R4Q8;P46782;M0R0R2;M0QZN2;Q59EK8	M0R0F0;Q53G25;A0A024R4Q8;P46782;M0R0R2	40S ribosomal protein S5;40S ribosomal protein S5, N-terminally processed	RPS5
27.6589	27.4823	27.2795	27.3326	27.3895	27.5327	27.3131	27.5193	27.841	5	8.4	81.871	1578600000	17	A0A024R4R3;O75175;B7Z6J7;H7C5J4;A0A0G2JPP0;H0Y5X7;H7C3F5;Q6ZMJ6;A0A0G2JN65;H7C148	A0A024R4R3;O75175;B7Z6J7	CCR4-NOT transcription complex subunit 3	CNOT3
27.1038	27.1347	27.0776	27.4034	27.1181	26.9968	NaN	NaN	26.9985	5	12	86.312	1161000000	14	A0A087WTE7;A0A024R4R9;C9JMY0;A0A087WUE4;Q96PV6;A0A0G2JNN3;E7EWC7;B0VJY8;A0A0G2JPW6	A0A087WTE7;A0A024R4R9;C9JMY0;A0A087WUE4;Q96PV6;A0A0G2JNN3;E7EWC7	Leukocyte receptor cluster member 8	LENG8
28.9839	29.055	29.2493	29.4856	29.6046	29.072	28.6286	29.2771	28.8477	3	16.2	25.104	5002600000	22	A0A024R4S0;O43633;M0R1L7;M0R1T5;M0QXX8	A0A024R4S0;O43633;M0R1L7;M0R1T5	Charged multivesicular body protein 2a	CHMP2A
29.3307	29.5587	29.6005	29.3151	29.5225	29.9246	29.4954	29.4426	29.8488	5	27.3	20.9	6677700000	34	A0A024R4T4;P61081;M0QYI6	A0A024R4T4;P61081	NEDD8-conjugating enzyme Ubc12	UBE2M
NaN	NaN	NaN	NaN	NaN	25.1157	NaN	NaN	NaN	3	10.9	56.928	256170000	2	A0A024R4U0;Q9NP61;B0QYV9;B0QYV8;B7Z6L2;B7Z4Q0	A0A024R4U0;Q9NP61;B0QYV9;B0QYV8;B7Z6L2;B7Z4Q0	ADP-ribosylation factor GTPase-activating protein 3	ARFGAP3
31.8032	31.8753	31.786	31.8214	31.7015	31.8044	31.8745	32.0065	31.873	20	41.1	74.403	32290000000	160	A0A024R4U3;Q14166;V9GY16;Q9BR23	A0A024R4U3;Q14166	Tubulin--tyrosine ligase-like protein 12	TTLL12
NaN	26.4637	NaN	NaN	25.8889	25.0364	NaN	NaN	NaN	3	7	40.269	487240000	9	A0A024R4V3;Q9NWS6;B0QY28;B0QY29	A0A024R4V3;Q9NWS6;B0QY28;B0QY29	Protein FAM118A	C22orf8;FAM118A
NaN	NaN	NaN	23.6556	NaN	NaN	NaN	NaN	NaN	3	5.3	53.879	54407000	2	Q59G93;J3KQ61;Q9Y4Q3;B7Z926;B4E3L9;A0A024R4W4;Q86X06;A0A024R4V5;O95696;B4DZ41;B4DZC2	Q59G93;J3KQ61;Q9Y4Q3;B7Z926;B4E3L9;A0A024R4W4;Q86X06;A0A024R4V5;O95696;B4DZ41	Bromodomain-containing protein 1	BRD1;DKFZp434B094
NaN	NaN	NaN	NaN	NaN	NaN	NaN	NaN	26.7487	2	8.5	51.483	760760000	1	B3KMU0;A0A0A0MSJ8;B3KMJ7;A0A024R4W0;T1ECW5;O75170	B3KMU0;A0A0A0MSJ8;B3KMJ7;A0A024R4W0;T1ECW5;O75170	Serine/threonine-protein phosphatase 6 regulatory subunit 2	PPP6R2;SAPS2
31.272	31.7097	31.7187	31.9171	31.7836	31.5482	31.5862	31.6282	31.5982	13	55.3	33.238	28093000000	149	A0A024R4X0;P00387;B1AHF3;Q6ZVI6	A0A024R4X0;P00387;B1AHF3;Q6ZVI6	NADH-cytochrome b5 reductase;NADH-cytochrome b5 reductase 3;NADH-cytochrome b5 reductase 3 membrane-bound form;NADH-cytochrome b5 reductase 3 soluble form	CYB5R3
29.9628	30.0218	30.1347	30.0218	29.8129	30.2049	30.3209	29.9633	30.2178	15	49.8	50.144	9519300000	76	A0A024R4X7;Q9UKX7;B4E2D3;B0QY21	A0A024R4X7;Q9UKX7	Nuclear pore complex protein Nup50	hCG_1989366;NUP50
26.1692	26.031	25.8544	26.0877	26.3606	26.6178	27.098	26.6622	26.4144	2	7.9	36.797	750030000	13	E9PS74;B0AZP8;A8K2X6;A0A024R4Y2;Q8NBI5;H0YD64;B4DV87	E9PS74;B0AZP8;A8K2X6;A0A024R4Y2;Q8NBI5;H0YD64;B4DV87	Solute carrier family 43 member 3	SLC43A3;hCG_39762
NaN	24.2163	NaN	NaN	24.3756	NaN	NaN	NaN	NaN	2	3.9	70.195	134230000	10	A0A024R4Z3;Q96PZ2	A0A024R4Z3;Q96PZ2	Protein FAM111A	FAM111A
31.6466	31.6049	31.5632	31.6911	31.7367	31.6847	31.8155	31.8778	31.8554	28	35.4	81.074	29850000000	225	A0A024R4Z6;Q08945;E9PMD4;Q59GH7;A0A0U1RRK2;E9PPZ7	A0A024R4Z6;Q08945	FACT complex subunit SSRP1	SSRP1
NaN	NaN	NaN	NaN	NaN	NaN	NaN	23.4061	NaN	2	7	45.819	106920000	6	Q86TK5;Q6PGN5;H0Y5W8;G5E933;A0A024R4Z9;O95248	Q86TK5;Q6PGN5;H0Y5W8;G5E933;A0A024R4Z9;O95248	Myotubularin-related protein 5	SBF1
NaN	NaN	NaN	NaN	26.3956	NaN	NaN	NaN	NaN	3	21.3	29.634	301690000	4	A0A024R500;Q6XYC5;J3KPT4;Q9H4I3	A0A024R500;Q6XYC5;J3KPT4;Q9H4I3	TraB domain-containing protein	RP3-402G11.12;TRABD
25.6094	25.8216	25.7775	25.9337	26.0972	26.0241	NaN	NaN	NaN	3	10.7	57.776	408520000	8	A0A024R521;Q59HG0;Q8NDX1;B3KN27	A0A024R521;Q59HG0;Q8NDX1	PH and SEC7 domain-containing protein 4	PSD4
NaN	26.9983	27.2954	27.0609	26.9056	27.2205	26.8184	26.6811	27.2619	3	26.2	21.241	1088300000	16	Q6NZ44;B3KXC3;A0A024R525;P02794;G3V1D1;G3V192;Q6NS36;E9PQR3;E9PPQ4;E9PKM5;E9PRK8;E9PK45;E9PKY7;Q8TD27	Q6NZ44;B3KXC3;A0A024R525;P02794;G3V1D1;G3V192;Q6NS36	Ferritin;Ferritin heavy chain;Ferritin heavy chain, N-terminally processed	FTH1
28.0319	27.8306	28.0798	28.1013	28.0335	27.9739	27.8625	27.7835	27.9039	7	19.1	54.661	2185100000	34	H0YCY6;A0A140VJH7;A0A024R529;Q3LXA3;I3L252;Q9UFX5;E9PJG8;E9PQR1;A0AUP5	H0YCY6;A0A140VJH7;A0A024R529;Q3LXA3;I3L252	Bifunctional ATP-dependent dihydroxyacetone kinase/FAD-AMP lyase (cyclizing);ATP-dependent dihydroxyacetone kinase;FAD-AMP lyase (cyclizing)	TKFC;DAK
31.9113	31.8267	31.9078	31.9627	31.8853	32.0559	32.0482	31.9625	32.0515	29	50.6	75.022	34970000000	210	A0A024R534;O94776	A0A024R534;O94776	Metastasis-associated protein MTA2	MTA2
27.2579	27.1119	27.119	26.9583	26.8912	27.0909	26.6679	26.3829	26.9376	16	13	181.79	1094400000	35	A0A024R542;Q9C0C2;B3KXS7;E9PKK0;Q86TK2	A0A024R542;Q9C0C2;B3KXS7	182 kDa tankyrase-1-binding protein	TNKS1BP1
26.5026	26.1474	26.4837	26.6157	25.8758	25.9766	25.2959	25.3386	25.4146	4	8.6	43.639	576770000	19	B7Z345;E9PS00;A0A024R564;Q9Y5Q0;Q59FV3	B7Z345;E9PS00;A0A024R564;Q9Y5Q0	Fatty acid desaturase 3	FADS3
30.6091	30.4436	30.7257	30.5753	30.6399	30.5056	30.634	30.7159	30.5857	6	63.2	14.199	13704000000	52	A0A024R565;Q9UI30;F5GX77;F5GYQ2	A0A024R565;Q9UI30;F5GX77;F5GYQ2	Multifunctional methyltransferase subunit TRM112-like protein	HSPC152;TRMT112
30.7684	30.6688	30.7506	30.7132	30.9494	30.9516	31.0698	30.9946	31.132	13	27.5	61.888	16745000000	95	A0A024R566;A0A024R588;B4DJU4;A0A024R5D9;A0A024R572;Q15637;B4DSE4;B4DX42;C9J792;Q14820;F8WEV5	A0A024R566;A0A024R588;B4DJU4;A0A024R5D9;A0A024R572;Q15637;B4DSE4	Splicing factor 1	SF1
26.0821	26.4157	26.3738	26.6012	26.3412	26.5514	26.6513	26.5045	26.4335	5	20.8	37.723	774100000	20	Q9UE24;E7EN32;A0A024R570;A0A024R5E3;A0A024R5D2;O00255;G9G6R5	Q9UE24;E7EN32;A0A024R570;A0A024R5E3;A0A024R5D2;O00255	Menin	MEN1
31.7164	31.7421	31.7503	31.7356	31.6444	31.71	31.5829	31.6116	31.5671	26	52.2	60.626	28957000000	169	B2R5U3;A0A024R571;Q9H4M9;B4DZH9;B4DTR4;B4DMV9;B4DR44;C9JC03;C9J2Z4;C9JIJ3;C9IZH1;C9JDQ8	B2R5U3;A0A024R571;Q9H4M9;B4DZH9;B4DTR4;B4DMV9;B4DR44;C9JC03;C9J2Z4	EH domain-containing protein 1	EHD1
26.1846	26.2683	26.2246	26.2613	26.1197	26.3277	26.2459	26.2226	NaN	5	27.6	32.096	617930000	7	B3KR33;A0A024R573;Q7L266;Q9BRH2;E9PJK6;B4DLU4;A0A087WUG3	B3KR33;A0A024R573;Q7L266;Q9BRH2	Isoaspartyl peptidase/L-asparaginase;Isoaspartyl peptidase/L-asparaginase alpha chain;Isoaspartyl peptidase/L-asparaginase beta chain	ASRGL1
28.2205	28.0077	28.2641	28.3404	28.2694	28.2747	28.1542	28.0031	28.057	4	30.1	19.198	2546900000	28	A0A024R578;Q13405;E9PI78;H0YDP7;E9PNF1;Q59GE9	A0A024R578;Q13405;E9PI78;H0YDP7;E9PNF1;Q59GE9	39S ribosomal protein L49, mitochondrial	MRPL49
26.8861	26.8423	26.8318	26.907	26.9532	26.8881	27.0591	27.289	26.9251	6	21.5	44.155	1095500000	31	A0A024R582;J3KMZ8;Q92785;E9PN04	A0A024R582;J3KMZ8;Q92785;E9PN04	Zinc finger protein ubi-d4	DPF2
31.1163	30.9973	30.753	30.7992	30.7028	30.8724	30.8408	30.758	30.8042	11	54.6	32.913	16313000000	78	E9PRQ7;A0A024R598;Q04323;E9PJ81;A0A024R539;A0A087WTZ5;B4E0P8;E9PS08;B4DNC6;B4DU88;Q05BV2	E9PRQ7;A0A024R598;Q04323;E9PJ81;A0A024R539;A0A087WTZ5;B4E0P8	UBX domain-containing protein 1	UBXN1;LOC51035
28.0696	27.9709	27.9999	28.2439	28.208	28.1179	28.2994	28.3402	28.2227	13	26.3	77.63	2529800000	59	A0A024R5B2;E7ETY4;A9CP04;A8K2S4;E9PC69;A0A140VJP1;Q7KZI7;A0A024R555	A0A024R5B2;E7ETY4;A9CP04;A8K2S4;E9PC69;A0A140VJP1;Q7KZI7;A0A024R555	Serine/threonine-protein kinase MARK2	MARK2;Par1b
NaN	NaN	NaN	NaN	NaN	NaN	NaN	NaN	25.3994	2	11.4	17.12	285180000	2	H0YEF3;A0A024R5B3;E9PN81;Q8TDP1	H0YEF3;A0A024R5B3;E9PN81;Q8TDP1	Ribonuclease H2 subunit C	RNASEH2C;AYP1
27.7493	28.206	28.5544	28.7069	28.8057	28.8743	28.7156	28.7116	28.5647	3	45.1	13.062	3359600000	24	E9PLI6;E9PS76;A0A024R5B9;Q8N9N8;E9PQD0;E9PS30;E9PNH5	E9PLI6;E9PS76;A0A024R5B9;Q8N9N8;E9PQD0;E9PS30	Probable RNA-binding protein EIF1AD	EIF1AD;MGC11102
30.1441	30.4503	30.3237	30.7266	30.8275	30.7161	30.5602	30.6382	30.6988	4	29.2	25.609	13388000000	65	A0A024R5C4;B7Z3E3;B7Z8W8;O95197;B7Z4M1;B7Z361;Q7RTN4;F5H891;F5GWG7;F5H617	A0A024R5C4;B7Z3E3;B7Z8W8;O95197;B7Z4M1;B7Z361	Reticulon;Reticulon-3	RTN3
30.4357	30.4636	30.4698	30.6396	30.675	30.7665	30.4081	30.2888	30.3994	29	40.7	129.63	12828000000	114	A0A024R5C5;P11498;E9PRE7;E9PS68	A0A024R5C5;P11498	Pyruvate carboxylase;Pyruvate carboxylase, mitochondrial	PC
27.7231	27.8239	27.8921	28.0762	28.0221	28.1649	28.0869	27.9242	28.1213	8	36.5	27.6	2223200000	61	A0A024R5D6;B5MBX0;Q96FF9;H0YCL8;B3KSI5	A0A024R5D6;B5MBX0;Q96FF9	Sororin	CDCA5
24.6684	NaN	24.5166	NaN	24.058	NaN	NaN	24.1949	24.231	2	15.5	19.44	150190000	6	E9PMC5;E9PM12;Q64F87;E9PNA6;A0A024R5E5;Q13488;Q6QBN8	E9PMC5;E9PM12;Q64F87;E9PNA6;A0A024R5E5;Q13488;Q6QBN8	V-type proton ATPase subunit a;V-type proton ATPase 116 kDa subunit a isoform 3	TCIRG1
26.2565	25.9726	26.4516	26.4912	25.9018	25.9821	25.8441	25.7029	NaN	7	10.2	88.339	576960000	17	B2RAQ8;A0A024R5F4;P50416	B2RAQ8;A0A024R5F4;P50416	Carnitine O-palmitoyltransferase 1, liver isoform	CPT1A
28.0615	27.6351	27.5593	28.1315	28.1562	28.6552	27.4488	27.4375	27.6345	3	10.1	54.469	2092600000	19	A8K0D2;A0A1Y1B909;A0A024R5F7;Q9UBM7;A0A1Y1BG54;A0A1Y1BBN3;B4E1K5;X5DNI9;E9PJ54;X5D9E1;H0YE57;E9PM00;A0A0S2Z3S3;X5DRD7	A8K0D2;A0A1Y1B909;A0A024R5F7;Q9UBM7;A0A1Y1BG54;A0A1Y1BBN3;B4E1K5;X5DNI9	7-dehydrocholesterol reductase	DHCR7
32.7724	32.6681	32.3741	32.5998	32.7598	32.5055	32.5688	32.7294	32.8797	9	74.2	10.058	56807000000	91	A0A024R5H0;O75531;B2R4V4	A0A024R5H0;O75531;B2R4V4	Barrier-to-autointegration factor;Barrier-to-autointegration factor, N-terminally processed	BANF1
26.5997	26.9994	26.7363	26.6054	NaN	NaN	26.6795	26.7882	NaN	9	17.4	104.9	918020000	8	A0A024R5H6;Q6VY07;E9PPK2;B4DF77;E9PNZ9;E9PNG7	A0A024R5H6;Q6VY07	Phosphofurin acidic cluster sorting protein 1	PACS1
29.9086	30.4176	30.5098	30.8002	31.1756	30.7943	30.4057	30.398	30.4961	12	44.7	23.549	14410000000	69	Q6FGX3;A0A024R5H8;A0A024R5J5;P20340;B7Z5Z9;Q53ET8;F5H3K7;F5GX61	Q6FGX3;A0A024R5H8;A0A024R5J5;P20340;B7Z5Z9;Q53ET8	Ras-related protein Rab-6A	RAB6A
27.3076	NaN	28.1282	NaN	NaN	26.9677	28.1155	27.4462	28.5124	3	58.6	10.134	1563000000	17	A0A024R5J6;Q9NYJ1	A0A024R5J6;Q9NYJ1	Cytochrome c oxidase assembly factor 4 homolog, mitochondrial	CHCHD8;COA4
31.2383	31.3217	31.2902	31.4059	31.2572	31.4263	31.1964	31.1539	31.1433	13	36.2	54.234	21651000000	120	A0A024R5K1;Q9BR76;Q9NSK3;A0A087WW53;F5H390;Q59F81;B4DIU2;F5H0D2	A0A024R5K1;Q9BR76;Q9NSK3	Coronin;Coronin-1B	CORO1B;DKFZp762I166
29.5276	29.0333	29.0476	29.2791	28.7346	29.0054	28.9128	28.7203	28.3904	4	35.5	19.213	4522400000	35	A0A024R5K3;E9PPW7;O00217;E9PN51;F8W9K7;E9PKH6;B4DYI3;Q53G17	A0A024R5K3;E9PPW7;O00217;E9PN51;F8W9K7;E9PKH6;B4DYI3;Q53G17	NADH dehydrogenase [ubiquinone] iron-sulfur protein 8, mitochondrial	NDUFS8
34.8102	34.7594	34.7652	35.1253	35.1008	34.9494	34.9122	34.7022	34.8171	21	56.9	46.44	267150000000	255	A0A024R5K8;P50454;B4DN87;A8K259;E9PPV6;E9PR70;E9PK86;E9PMI5;Q9NPA9;E9PKH2;E9PNX1;E9PQ34;E9PJH8;E9PIG2;E9PRS3;H0YEP8;E9PLA6	A0A024R5K8;P50454;B4DN87;A8K259;E9PPV6;E9PR70;E9PK86;E9PMI5;Q9NPA9	Serpin H1	SERPINH1;ra-a47
NaN	25.4298	25.4171	NaN	25.0594	NaN	NaN	25.024	NaN	4	13.3	55.799	286170000	6	A0A024R5L0;P42785;B7Z7Q6;E9PNF7;B3KR26;E9PL49;E9PLY4;E9PQB5;E9PL85;E9PNJ1;E9PQN3;E9PKN6;E9PIG4	A0A024R5L0;P42785;B7Z7Q6;E9PNF7;B3KR26	Lysosomal Pro-X carboxypeptidase	PRCP
31.9244	31.5094	31.6991	31.5419	31.4712	31.4962	31.6794	31.5875	31.8657	14	39	66.393	28407000000	71	B5BU72;A0A024R5L7;A8K5U9;A0A024R5P1;Q13492;E9PI56;E9PKP6;E9PLJ8;Q8N6B4;E9PK13;H0YCY1;E9PJT1;E5RFU0;E5RHK9;E5RFC6;E5RK51;E5RIJ5;E5RGY9;E9PDG8;H0UI15;O60641	B5BU72;A0A024R5L7;A8K5U9;A0A024R5P1;Q13492	Phosphatidylinositol-binding clathrin assembly protein	PICALM
NaN	NaN	NaN	NaN	NaN	NaN	NaN	NaN	25.022	2	16.8	21.934	355170000	1	F5H8G1;F5GY11;F5H1Z6;F5H8H3;B3KTJ1;A0A024R5L8;Q9Y365;F5GY07;F5GWK5;F5H5A8;H0YGN8;F5H3G8;F5H0V7;H0YH17;H0YGA9;A0A024R5G8;H0YFF3	F5H8G1;F5GY11;F5H1Z6;F5H8H3;B3KTJ1;A0A024R5L8;Q9Y365;F5GY07;F5GWK5;F5H5A8;H0YGN8;F5H3G8;F5H0V7;H0YH17;H0YGA9;A0A024R5G8;H0YFF3	PCTP-like protein	STARD10
30.5736	30.3203	30.5496	30.63	30.5663	30.6597	30.3891	30.4204	30.5285	8	30.4	57.466	12884000000	71	A0A024R5M3;Q53HG7;Q14247;Q76MU0;B3KRK4;B4E358;H0YEV2;H0YCD9	A0A024R5M3;Q53HG7;Q14247;Q76MU0	Src substrate cortactin	CTTN;EMS1
26.8774	26.6103	26.8105	27.154	26.8987	27.0276	27.2728	27.0384	27.2672	8	23.8	51.342	1208300000	22	B7ZAQ5;A0A024R5M8;Q15054;B4DYZ7;Q05BV7;Q569I8;E9PRK3;H0YEX7;E9PNC0;B4DMA6;Q8WUF6;E9PM91	B7ZAQ5;A0A024R5M8;Q15054;B4DYZ7;Q05BV7;Q569I8;E9PRK3	DNA polymerase delta subunit 3	POLD3
30.6082	30.3149	30.4545	30.1369	30.1737	30.3851	30.3614	30.4168	30.4034	4	42.6	14.665	11656000000	56	A0A024R5Q1;Q9NX55;J3QT56	A0A024R5Q1;Q9NX55	Huntingtin-interacting protein K	hCG_2003792;HYPK
30.4046	30.4345	30.4558	30.5171	30.3272	30.6219	30.3839	30.6678	30.4849	16	47.8	50.097	12576000000	84	A0A024R5Q7;P30520;B4E1L0;G3V5D8;G3V232;B3KTV4;Q8N142	A0A024R5Q7;P30520;B4E1L0	Adenylosuccinate synthetase isozyme 2	ADSS
27.6764	27.544	27.6119	28.0783	27.8214	27.648	27.5104	27.4901	27.6325	7	18.7	52.998	1795100000	30	A0A024R5Q8;Q05D32;H0YMB4;H0YNU2;H0YNW9;H0YMH7	A0A024R5Q8;Q05D32	CTD small phosphatase-like protein 2	CTDSPL2
NaN	26.267	26.5935	NaN	NaN	NaN	26.9	26.7943	27.5552	3	9.2	36.85	856520000	6	H9ZYI9;A0A024R5R5;B7Z726;A0A024R5X6;Q06547;H0YNZ0;B4DXA3;Q5SZG2;B2R924;Q8TAK5	H9ZYI9;A0A024R5R5;B7Z726;A0A024R5X6;Q06547	GA-binding protein subunit beta-1	GABPB1;GABPB2
28.226	28.4153	28.2687	28.3131	28.2266	28.4434	28.5207	28.1866	28.3827	15	17.3	127.49	2831700000	40	A8K8N5;A0A024R5S4;P40818;A0A075B720;Q05CD9;Q05DF5;B4DUC6;H0YM47;H0YNL5;H0YKV1;H0YLH2;H0YLS3;H0YM17;B3KRK3	A8K8N5;A0A024R5S4;P40818;A0A075B720;Q05CD9;Q05DF5	Ubiquitin carboxyl-terminal hydrolase;Ubiquitin carboxyl-terminal hydrolase 8	USP8
30.9084	30.9429	30.9787	30.9043	30.9009	30.9028	30.9407	30.8899	31.0274	8	44.6	29.062	17011000000	64	A0A024R5S5;O75822;H0YLP3;H0YGJ7	A0A024R5S5;O75822;H0YLP3	Eukaryotic translation initiation factor 3 subunit J	EIF3S1;EIF3J
NaN	NaN	NaN	27.2046	NaN	NaN	NaN	NaN	NaN	3	5.8	87.339	798300000	4	A0A024R5S7;Q9ULG6;H3BN32	A0A024R5S7;Q9ULG6	Cell cycle progression protein 1	CCPG1
28.0233	27.8652	27.8941	28.3954	27.959	28.1015	27.5338	27.5212	27.5474	11	14.8	104.16	2183400000	50	A0A024R5S9;H0Y8X6;P46934;H0Y9L1	A0A024R5S9;H0Y8X6;P46934	E3 ubiquitin-protein ligase NEDD4	NEDD4
28.304	28.1617	28.3259	27.9773	28.0607	28.7093	28.7665	28.6151	28.5139	6	21.7	72.964	2993800000	33	A0A024R5T1;A0A024R5Z0;Q99081;B4DZH5;B4DZ50;B4DZP2;H0YNP8;F5GY10;B4DH96;B4DGI9;Q9NQY2;H3BRK2;H3BNF4;H0YNQ5	A0A024R5T1;A0A024R5Z0;Q99081;B4DZH5;B4DZ50;B4DZP2;H0YNP8;F5GY10;B4DH96;B4DGI9	Transcription factor 12	TCF12
28.578	28.6043	28.5701	28.8576	28.7796	28.7995	28.7777	28.6218	28.8669	11	22.2	84.141	3711700000	71	A0A024R5U5;O14672;A0AV88;H0YK87;C9J9B4;H0YNC5	A0A024R5U5;O14672;A0AV88	Disintegrin and metalloproteinase domain-containing protein 10	ADAM10
NaN	NaN	25.1862	24.992	25.7287	26.7919	26.1472	26.1259	26.5107	3	26.4	19.568	512640000	21	B3KP47;A0A024R5U8;Q9UHA3;H3BMQ2;H3BPF2	B3KP47;A0A024R5U8;Q9UHA3	Probable ribosome biogenesis protein RLP24	C15orf15;RSL24D1
NaN	26.5148	NaN	NaN	26.4512	NaN	NaN	NaN	NaN	3	6.5	79.57	810780000	2	A0A024R5U9;Q6PJW8;A0A024R5P7	A0A024R5U9;Q6PJW8	Consortin	C1orf71;CNST
26.6675	26.856	26.8056	26.5412	26.6859	26.4043	26.2096	26.465	26.5899	9	5	339.64	849270000	40	A0A024R5V2;Q8TDJ6;H0YLM8;Q8WTV7;H0YM41	A0A024R5V2;Q8TDJ6	DmX-like protein 2	DMXL2
27.3364	27.4514	27.6373	27.2723	27.4615	27.505	27.5071	27.4161	27.4302	15	4.3	532.22	1541900000	32	A0A024R5W0;Q15751;H0YMH0;H0YK45;H0YNB1;B4DKS2	A0A024R5W0;Q15751	Probable E3 ubiquitin-protein ligase HERC1	HERC1
23.04	23.269	23.9164	23.6603	23.6285	23.1539	23.4857	23.2814	23.2499	3	3.7	84.099	94053000	13	H0YL38;A8K124;B4DHL1;A0A024R5W1;Q6N043;H0YLA6	H0YL38;A8K124;B4DHL1;A0A024R5W1;Q6N043	Zinc finger protein 280D	ZNF280D;SUHW4
24.3238	NaN	24.3555	24.4576	NaN	24.5478	NaN	NaN	24.0527	2	7.8	48.968	125920000	6	A0A024R5X5;B2RD76;A0A024R5Y2;Q13163;H7BZL1;A0A087WWX7;B3KQ65;A6NK28	A0A024R5X5;B2RD76;A0A024R5Y2;Q13163;H7BZL1;A0A087WWX7;B3KQ65;A6NK28	Dual specificity mitogen-activated protein kinase kinase 5	MAP2K5
29.901	29.8562	30.0885	30.1494	30.2805	30.2072	30.2383	30.1755	30.1978	18	32.1	69.223	9811500000	109	A0A024R5X7;O76031;Q9H072;H0YM48;H0YK07	A0A024R5X7;O76031;Q9H072	ATP-dependent Clp protease ATP-binding subunit clpX-like, mitochondrial	CLPX;DKFZp586J151
26.5563	NaN	26.4086	26.4153	25.9165	26.4331	NaN	26.4439	NaN	2	7.8	34.96	578910000	7	A0A024R5Y1;Q9NZD8;H0YML6;H0YLD7;H0YLW1;H0YLT5;H0YKM6;H0YMB7;H0YKB0;H3BRR0	A0A024R5Y1;Q9NZD8;H0YML6;H0YLD7;H0YLW1;H0YLT5;H0YKM6;H0YMB7;H0YKB0;H3BRR0	Maspardin	SPG21
27.4491	27.0259	27.0008	26.983	26.8763	26.5403	26.9061	27.0622	27.0024	5	14.8	43.658	1125800000	14	Q59F45;A0A024R5Z3;P84022	Q59F45;A0A024R5Z3;P84022	Mothers against decapentaplegic homolog;Mothers against decapentaplegic homolog 3	SMAD3
34.1157	34.3553	34.1907	34.222	34.2663	34.2467	34.2408	34.3463	34.3406	27	75.5	38.604	172700000000	253	A0A024R5Z7;P07355;V9HW65;H0YM50;H0YN42;H0YMD0;H0YMU9;B3KRQ1;A6NMY6;H0YNP5;H0YKS4;H0YN28;H0YL33;B4DNH8;H0YMM1;H0YKL9;H0YKZ7;H0YLV6;H0YMT9;H0YKX9;H0YKV8;H0YMW4;H0YNA0;H0YN52;H0YMD9;H0YNB8;H0YKN4;H0YLE2	A0A024R5Z7;P07355;V9HW65;H0YM50;H0YN42;H0YMD0;H0YMU9;B3KRQ1;A6NMY6	Annexin;Annexin A2;Putative annexin A2-like protein	ANXA2;HEL-S-270;ANXA2P2
NaN	NaN	NaN	NaN	25.2314	NaN	NaN	NaN	NaN	2	29.9	8.6227	283560000	1	A0A1B0GW73;H3BRN7;H3BNF1;A0A1B0GTV3;H3BTY4;A0A0S2Z5D0;H3BUV4;A0A1B0GUD2;H3BUT1;A0A1B0GTU6;A0A0S2Z5G3;A0A024R601;Q9NWW5	A0A1B0GW73;H3BRN7;H3BNF1;A0A1B0GTV3;H3BTY4;A0A0S2Z5D0;H3BUV4;A0A1B0GUD2;H3BUT1;A0A1B0GTU6;A0A0S2Z5G3;A0A024R601;Q9NWW5	Ceroid-lipofuscinosis neuronal protein 6	CLN6
31.7782	31.7221	31.7182	31.7367	31.3993	31.4806	31.82	31.8529	31.9419	3	75.2	11.399	29819000000	45	Q7Z612;A0A024R608;P05386;Q6ICQ4;Q6FG99	Q7Z612;A0A024R608;P05386;Q6ICQ4	60S acidic ribosomal protein P1	RPLP1
29.559	29.2516	29.3185	29.3878	29.3179	29.2068	29.4366	29.3048	29.6799	9	49.2	35.08	5897100000	32	A0A024R625;P60510;H3BTA2;Q5U086;H3BV22;I3L4X0;H3BPN5;H3BVE3	A0A024R625;P60510;H3BTA2;Q5U086;H3BV22	Serine/threonine-protein phosphatase;Serine/threonine-protein phosphatase 4 catalytic subunit	PPP4C
28.0382	28.6173	28.3914	28.2556	28.2976	28.657	28.2762	28.4285	28.2045	4	26	40.321	2874700000	28	A0A024R629;P16150;C9JUK7	A0A024R629;P16150;C9JUK7	Leukosialin	SPN
NaN	NaN	NaN	NaN	NaN	NaN	NaN	25.5994	25.6658	6	7.7	146.55	428810000	11	A0A024R637;O60343;Q5JU47	A0A024R637;O60343	TBC1 domain family member 4	TBC1D4
27.461	27.839	27.6757	27.6768	27.8662	28.0633	27.9088	27.7646	27.8652	7	18.3	41.165	1945800000	39	Q6NUM7;A0A024R640;Q9NUQ2;H0YC22	Q6NUM7;A0A024R640;Q9NUQ2;H0YC22	1-acyl-sn-glycerol-3-phosphate acyltransferase epsilon	AGPAT5
28.5926	29.572	29.8339	29.8984	29.7325	30.2942	30.3236	30.0449	30.5998	4	65.2	10.378	8772500000	34	A0A024R648;Q9Y5J7;G3V2F3;A0A1W2PRH9;A0A1W2PQS5;G3V502	A0A024R648;Q9Y5J7;G3V2F3;A0A1W2PRH9;A0A1W2PQS5;G3V502	Mitochondrial import inner membrane translocase subunit Tim9	TIMM9
27.6873	27.6074	27.5474	27.4394	27.3582	27.7142	27.5639	27.3815	27.7038	3	38	18.057	1665000000	10	G3V4W4;A0A024R649;Q96EK6;G3V5E4	G3V4W4;A0A024R649;Q96EK6	Glucosamine 6-phosphate N-acetyltransferase	GNPNAT1
NaN	NaN	NaN	NaN	NaN	NaN	NaN	NaN	25.6098	2	3.2	134.95	230030000	5	A0A024R680;A0A024R6A2;A0A024R657;P29374;Q05CG0;H7C485;C9J1W3	A0A024R680;A0A024R6A2;A0A024R657;P29374;Q05CG0;H7C485	AT-rich interactive domain-containing protein 4A	ARID4A
31.028	31.0058	30.9159	30.948	30.9539	31.1506	31.1838	31.2336	31.2395	32	31.5	156.27	19001000000	135	A0A024R663;Q86UP2;B7Z6P3;B3KWP6;H0YJZ8;G3V5P0;H0YJV5;Q6NZ46;Q6PDF7;Q3SWV9;H0YJP2;G3V5G2	A0A024R663;Q86UP2	Kinectin	KTN1
25.4929	25.7621	25.5247	25.4749	25.6214	25.601	25.7565	25.622	NaN	2	13.3	24.798	398320000	3	G3V4B8;A0A024R667;Q96FK6	G3V4B8;A0A024R667;Q96FK6	WD repeat-containing protein 89	WDR89;C14orf150
29.5447	29.5076	29.6592	29.7812	29.6567	29.6227	29.5612	29.594	29.6149	10	52.6	28.262	6916300000	52	A0A024R683;Q9Y5K8;G3V2S6;Q9H3H0;Q8N5Z9;Q6PJ05;H0YJH8;G3V2V6;G3V559;H0YJS0;Q9NW63;G3V3T8;H0YJ55;G3V5S7;G3V341	A0A024R683;Q9Y5K8;G3V2S6;Q9H3H0;Q8N5Z9;Q6PJ05;H0YJH8;G3V2V6;G3V559	V-type proton ATPase subunit D	ATP6V1D;VATD
NaN	NaN	NaN	NaN	25.3278	NaN	NaN	NaN	NaN	3	6.8	61.796	145640000	2	A0A0U1RRM8;H0YJ34;A8K6S3;A0A024R687;Q96AC1;H0YJB6;G3V3J0	A0A0U1RRM8;H0YJ34;A8K6S3;A0A024R687;Q96AC1	Fermitin family homolog 2	FERMT2;PLEKHC1
27.7608	27.7244	27.7772	27.6789	27.401	27.4225	27.2771	27.5032	27.2366	6	28.2	35.823	1643000000	29	A0A024R688;P51948;H0YJ92;H0YJF2;A0A024R669	A0A024R688;P51948;H0YJ92;H0YJF2;A0A024R669	CDK-activating kinase assembly factor MAT1	MNAT1
31.7041	31.7311	31.7869	31.8304	31.7057	31.8994	31.7533	31.6781	31.6165	24	54.3	103.06	30384000000	191	A0A024R694;P12814;H9KV75;B7Z565;Q86TX4;B4DFY0;B3KUX9;B7Z2W3;G3V2N5;G3V2W4;B4DRP5;H7C5W8;P35609;H0YJ11;H0YJW3;A1L0V1;B7Z2N5;G3V2X9;B7Z4V1;B2R8Y4;Q08043;B4DZQ2;A0A087WSZ2;Q5ZEZ4;G3V5M4;B7Z4P6;Q59FD9;B7Z4K1;F6THM6;G3V2E8;G3V380;Q4VAM3	A0A024R694;P12814;H9KV75;B7Z565;Q86TX4	Alpha-actinin-1	ACTN1
26.9228	27.0465	27.3393	27.6762	27.3314	27.4574	26.4882	26.5292	26.7005	5	25.4	38.577	1206400000	20	A0A024R6A0;P78540	A0A024R6A0;P78540	Arginase;Arginase-2, mitochondrial	ARG2
26.4728	26.3871	26.9464	26.8409	26.6927	26.8504	26.4017	26.6105	26.7809	5	20.9	42.477	899970000	12	B5BUD5;B2R8E4;A0A024R6A5;P35813;E9PKB5;E9PL75;E9PJN3;Q5JB49	B5BUD5;B2R8E4;A0A024R6A5;P35813;E9PKB5	Protein phosphatase 1A	PPM1A
27.7696	27.3602	27.5619	27.0531	26.8706	27.2029	26.9705	26.8846	27.8341	3	33.8	16.23	1404900000	15	J3KMY5;Q53HV6;A0A024R6C0;H0YIZ1;G3V3E8;E7EMS2;B4DV10;G3V3D1;P61916;G3V2V8;B2R4S5	J3KMY5;Q53HV6;A0A024R6C0;H0YIZ1;G3V3E8;E7EMS2;B4DV10;G3V3D1;P61916;G3V2V8;B2R4S5	Epididymal secretory protein E1	NPC2
26.5889	26.711	26.4196	26.4277	26.5232	26.6334	26.9319	26.8653	26.7004	4	12.5	69.358	892740000	14	B2RCI6;A0A024R6C4;A0A024R6F4;P49757;A0A024R684;A0A024R681;G3V3M5;Q86SW6;Q86SW5;G3V3R1;G3V3Z8;G3V4S6;G3V433;Q5D0E5	B2RCI6;A0A024R6C4;A0A024R6F4;P49757;A0A024R684;A0A024R681;G3V3M5;Q86SW6;Q86SW5;G3V3R1;G3V3Z8	Protein numb homolog	NUMB
29.6601	29.7373	29.7537	29.8749	29.8719	30.0252	29.6695	29.6334	29.8668	9	31.3	48.819	7772500000	75	Q6IBS5;A0A024R6C9;P36957;Q86TQ8;Q86TW7;Q86SW4;Q16187;H0YJF9;G3V5M3;G3V3F0;Q6LEQ7;B7Z6J1	Q6IBS5;A0A024R6C9;P36957;Q86TQ8	Dihydrolipoyllysine-residue succinyltransferase component of 2-oxoglutarate dehydrogenase complex, mitochondrial	DLST
27.4794	27.8588	28.0322	28.0652	27.9705	28.1092	27.5476	27.4134	27.797	10	13.4	107.15	1976800000	36	A0A024R6D1;Q8TD19;Q6PKF2;B3KY50;G3V459;G3V5V0;G3V2Z5	A0A024R6D1;Q8TD19	Serine/threonine-protein kinase Nek9	NEK9
31.5954	31.8509	31.9362	32.0399	32.0692	31.9911	31.7483	31.9312	32.0947	5	45.2	12.259	34028000000	45	A0A024R6D4;P84090;G3V279	A0A024R6D4;P84090;G3V279	Enhancer of rudimentary homolog	ERH
28.809	28.8934	29.1157	29.1271	29.1389	29.112	28.9015	29.3675	29.3731	3	21.3	31.263	4821800000	30	A0A024R6D8;Q59EK7;Q13243;B4DJK0;B4DUA4;G3V5K8;Q86U32	A0A024R6D8;Q59EK7;Q13243;B4DJK0;B4DUA4	Serine/arginine-rich splicing factor 5	SFRS5;SRSF5
26.6305	27.0552	27.1817	26.9052	27.1765	27.2086	26.8532	26.7374	26.5785	4	15.3	57.966	1074000000	19	Q53FN8;A0A024R6G4;Q02252;Q53H94;G3V4Z4;O43573	Q53FN8;A0A024R6G4;Q02252;Q53H94;G3V4Z4	Methylmalonate-semialdehyde dehydrogenase [acylating], mitochondrial	ALDH6A1
NaN	NaN	NaN	28.1261	NaN	NaN	NaN	NaN	NaN	2	20.7	6.9611	1670500000	2	A0A024R6G6;Q3MHU6;O75438	A0A024R6G6;Q3MHU6;O75438	NADH dehydrogenase [ubiquinone] 1 beta subcomplex subunit 1	NDUFB1
30.3976	30.4699	30.2636	30.2769	30.1848	30.2175	30.3185	30.4032	30.2186	11	22	88.486	11157000000	60	A0A024R6H0;Q9P2I0;B3KMI0;B3KN45;H0YJF4;G3V3T7	A0A024R6H0;Q9P2I0;B3KMI0;B3KN45	Cleavage and polyadenylation specificity factor subunit 2	CPSF2
27.3108	27.2225	27.0455	27.2018	27.2606	27.232	27.3473	27.1731	27.3753	7	18.5	62.924	1335400000	10	A0A024R6H1;O15270;H0YJV2	A0A024R6H1;O15270;H0YJV2	Serine palmitoyltransferase 2	SPTLC2
30.256	30.409	30.6911	30.9504	30.8576	30.8042	30.7881	30.3419	30.7325	5	30.1	24.976	14221000000	51	A0A024R6I3;Q53GF9;P49755;B4DZH3;G3V2K7;B4DL12	A0A024R6I3;Q53GF9;P49755;B4DZH3	Transmembrane emp24 domain-containing protein 10	TMED10
NaN	26.3441	26.1284	NaN	26.0696	26.2744	26.1415	NaN	NaN	4	15.9	64.239	730490000	11	A0A024R6K1;O75909;G3V235;G3V2Q3;G3V5E1	A0A024R6K1;O75909;G3V235;G3V2Q3;G3V5E1	Cyclin-K	CCNK
26.1305	26.11	NaN	26.504	26.8051	26.3015	NaN	NaN	NaN	6	14.3	67.256	812260000	8	A0A024R6K3;Q86TU7;Q6NXR6;C9K0W5	A0A024R6K3;Q86TU7;Q6NXR6	Histone-lysine N-methyltransferase setd3	SETD3
34.008	34.1201	34.0947	34.6083	34.6249	34.6696	33.8177	33.5103	33.8364	26	67.9	53.165	163220000000	233	A0A024R6K8;P23381;G3V3H8;G3V3Y5;G3V277;B4DTK8;G3V423;G3V5U1;G3V456;H0YJP3;G3V3P2;G3V227;G3V2Y7;G3V3S7;G3V3X0;G3V4C7;G3V4N8;G3V5W1;G3V5H5;P78534;G3V4A3;G3V4Q0;G3V2F2;G3V3R3;G3V4S4;G3V313;G3V339;G3V2C0;G3V4N0	A0A024R6K8;P23381;G3V3H8;G3V3Y5;G3V277;B4DTK8	Tryptophan--tRNA ligase, cytoplasmic;T1-TrpRS;T2-TrpRS	WARS
29.1731	29.3861	29.246	29.1783	29.3102	29.2616	29.3308	29.3026	29.3319	17	31.4	82.842	5443900000	68	A0A024R6M3;P51003;G3XAH6;B4DYF4;B4DHB8;A0A0C4DGK1;G3V3I9;G3V2A0;A0A024R6J7;G3V457;B7ZA53;B4DZL2;A4D1Z6;A0ZTA0;Q9NRJ5;H0YJ00;H0YJL4;H7C3W0;F8WAT4	A0A024R6M3;P51003;G3XAH6;B4DYF4;B4DHB8;A0A0C4DGK1	Poly(A) polymerase alpha	PAPOLA
25.2016	25.721	25.858	25.8691	25.7395	26.0433	25.7768	25.9202	26.0393	4	13.9	51.199	495760000	19	A0A024R6M6;Q9UL15;A8K5J7;G3V274	A0A024R6M6;Q9UL15;A8K5J7;G3V274	BAG family molecular chaperone regulator 5	BAG5
NaN	NaN	NaN	NaN	NaN	NaN	NaN	24.418	NaN	2	14	23.398	76884000	3	H0YL25;A0A024R6N1;Q13114;H0YL26;A6NHG8	H0YL25;A0A024R6N1;Q13114;H0YL26;A6NHG8	TNF receptor-associated factor 3	TRAF3
32.3114	32.3609	32.2973	32.3267	32.2261	32.3312	32.5894	32.5809	32.565	18	40.6	49.222	47885000000	155	A0A024R6Q1;P55010;Q6IBU0;H0YLZ1;Q32Q19;Q05DF3;H0YN40;H0YMJ8;H0YM54;B4DEN3;H0YK29;H0YK11	A0A024R6Q1;P55010;Q6IBU0	Eukaryotic translation initiation factor 5	EIF5
27.6391	27.5718	27.5641	27.2384	27.5622	27.817	27.6595	27.5988	27.8275	5	17.6	31.381	1735400000	31	A0A024R6Q2;Q96FX7;Q96B39;H0Y2Q1	A0A024R6Q2;Q96FX7;Q96B39;H0Y2Q1	tRNA (adenine(58)-N(1))-methyltransferase catalytic subunit TRMT61A	C14orf172;TRMT61A
26.5853	26.9091	26.8269	27.118	27.3219	26.5812	NaN	26.8887	26.9751	7	21.9	57.464	1020000000	11	A0A024R6Q8;Q9NPI1;I3L4V5	A0A024R6Q8;Q9NPI1	Bromodomain-containing protein 7	BRD7
NaN	25.3596	25.743	25.5093	25.7148	25.7789	25.4533	25.5228	25.8093	3	4	75.632	409940000	9	B2RDX0;A8K7Z9;A0A024R6R1;Q8NEM2;I3L3Z1	B2RDX0;A8K7Z9;A0A024R6R1;Q8NEM2	SHC SH2 domain-binding protein 1	SHCBP1
NaN	NaN	25.0765	NaN	NaN	25.0563	25.3064	NaN	25.0553	3	19.8	28.046	198280000	3	B3KMP9;A0A024R6R3;Q9Y5N6;H3BT22;Q9H806;H3BTQ7	B3KMP9;A0A024R6R3;Q9Y5N6;H3BT22	Origin recognition complex subunit 6	ORC6L;ORC6
27.5319	27.381	27.4118	27.1874	27.4343	27.5424	27.3704	27.2313	27.1377	5	31.8	33.17	1450900000	36	Q1RN03;A0A024R6R5;Q9UKV5;Q6PGR1;H3BRK9;R4GNG2	Q1RN03;A0A024R6R5;Q9UKV5	E3 ubiquitin-protein ligase AMFR	AMFR;hCG_1811773
30.242	30.8625	30.626	30.3907	30.6824	30.7457	30.767	30.7462	30.6971	11	37.1	45.745	14119000000	93	A0A024R6S1;O60884;T2DN57;T2DPK5;I3L320;A0A087WT48	A0A024R6S1;O60884	DnaJ homolog subfamily A member 2	DNAJA2
27.6315	27.9467	27.447	27.5185	27.3525	27.6508	28.0244	27.5068	27.6635	7	29.9	28.912	1753300000	27	A0A024R6T8;Q9GZU8;H3BTI2;H3BTP8;H3BSY6;H3BP64;H3BUL4;H3BMX9;H3BQQ6;H3BN22;Q6P4H7;H3BSF0;H3BPF9;H3BPH9;Q2VIL1;H3BNK9;H3BU93	A0A024R6T8;Q9GZU8;H3BTI2;H3BTP8;H3BSY6;H3BP64;H3BUL4;H3BMX9;H3BQQ6;H3BN22;Q6P4H7;H3BSF0	Protein FAM192A	NIP30;FAM192A
NaN	NaN	NaN	NaN	25.6107	25.4728	25.2668	24.9211	25.2875	2	4.8	61.948	240440000	8	A0A024R6U1;Q9BVA0;H3BTU7;Q59G59	A0A024R6U1;Q9BVA0;H3BTU7;Q59G59	Katanin p80 WD40 repeat-containing subunit B1	KATNB1
26.9499	26.0927	26.165	26.486	NaN	25.7803	25.8776	25.5716	25.7924	5	31.4	33.886	589430000	13	H3BNT2;A0A024R6U3;O75208;B4DIV2;H3BSJ5;B4DEE3;H3BPC6;B4E0U3;H3BRC0;H3BPY0;H3BPW3;H3BVA5	H3BNT2;A0A024R6U3;O75208;B4DIV2;H3BSJ5;B4DEE3;H3BPC6;B4E0U3;H3BRC0	Ubiquinone biosynthesis protein COQ9, mitochondrial	COQ9;hCG_2025883
25.1444	25.2843	NaN	NaN	NaN	NaN	NaN	NaN	24.9344	2	15.4	13.812	264510000	5	H3BU49;A0A024R6U9;Q9Y2Y0;B4DQD8;H3BM52	H3BU49;A0A024R6U9;Q9Y2Y0;B4DQD8;H3BM52	ADP-ribosylation factor-like protein 2-binding protein	ARL2BP
32.7584	32.5898	32.9617	32.5392	32.4661	32.6769	32.7656	32.5912	32.8863	20	63.6	41.326	59095000000	147	B3KUZ8;A0A024R6W0;P00505;A8K482;B4DY39	B3KUZ8;A0A024R6W0;P00505;A8K482	Aspartate aminotransferase;Aspartate aminotransferase, mitochondrial	GOT2
30.9156	30.7384	31.2485	31.1408	31.226	31.0923	31.1455	31.0519	31.1697	14	58.1	26.215	19089000000	91	B2R6U8;A0A024R6W2;O43809;H3BND3;H3BV41;Q5HYH5	B2R6U8;A0A024R6W2;O43809;H3BND3	Cleavage and polyadenylation specificity factor subunit 5	NUDT21
NaN	NaN	NaN	NaN	24.002	NaN	NaN	NaN	NaN	3	6.4	64.454	77740000	2	Q53H57;Q6IPK9;Q4G0E9;A0A024R6X1;O00748	Q53H57;Q6IPK9;Q4G0E9;A0A024R6X1;O00748	Carboxylic ester hydrolase;Cocaine esterase	CES2
28.4514	28.7874	28.7382	28.9027	28.6121	28.9992	28.827	28.6691	28.6294	4	34.6	21.508	3737000000	27	A0A024R6X2;A8K719;Q13951;A0A024R6W3;H3BSC0;J3KRT0;J3KS23	A0A024R6X2;A8K719;Q13951;A0A024R6W3;H3BSC0	Core-binding factor subunit beta	CBFB
30.9894	30.8899	31.2946	30.7965	31.0324	30.1405	30.8812	30.6806	31.1622	4	51.2	14.478	16909000000	26	A0A024R6Y2;P61970;H3BRV9	A0A024R6Y2;P61970;H3BRV9	Nuclear transport factor 2	NUTF2
27.4375	27.6751	27.2299	27.3635	27.3816	27.4348	27.5936	27.4571	27.3384	6	14	54.099	1519400000	17	A0A024R6Z0;O43237;J3KRI4;B4DHD8;H3BUM4;Q63HJ8;B4E2E0;J3KSD2	A0A024R6Z0;O43237;J3KRI4;B4DHD8	Cytoplasmic dynein 1 light intermediate chain 2	DYNC1LI2
26.1426	26.3441	26.4288	26.2819	26.1572	26.5577	26.934	26.8734	26.6918	6	16.4	77.526	801630000	16	A0A024R704;P78362;H7C521;H7C5L6;F8WBW4	A0A024R704;P78362	SRSF protein kinase 2;SRSF protein kinase 2 N-terminal;SRSF protein kinase 2 C-terminal	SRPK2
29.9541	30.1576	30.0734	29.9998	29.9198	29.9825	30.0597	30.1094	30.0254	11	28.1	48.897	9216900000	86	A0A024R705;Q9UN37;I3L4J1;Q9NXK5;Q9UF30;Q49AN7	A0A024R705;Q9UN37;I3L4J1	Vacuolar protein sorting-associated protein 4A	VPS4A
26.0648	NaN	NaN	NaN	NaN	NaN	25.9166	NaN	NaN	2	3.4	86.741	163440000	4	B4DIN7;A0A024R711;O00308	B4DIN7;A0A024R711;O00308	E3 ubiquitin-protein ligase;NEDD4-like E3 ubiquitin-protein ligase WWP2	WWP2
30.8659	30.8854	30.6883	30.6974	30.6935	30.887	30.6831	30.7403	30.8335	16	44.7	46.302	15391000000	109	A0A024R712;P31323;B3KY43;Q6DHZ2;Q75MP1;O60380	A0A024R712;P31323;B3KY43;Q6DHZ2;Q75MP1	cAMP-dependent protein kinase type II-beta regulatory subunit	PRKAR2B
32.5575	32.6921	32.7803	32.7239	32.7311	32.7403	32.5326	32.5483	32.6759	16	53.8	48.899	56972000000	170	B4DFL1;A0A024R713;P09622;E9PEX6;B4DMK9;F8WDM5;A0A1W2PR83;F2Z2E3	B4DFL1;A0A024R713;P09622;E9PEX6;B4DMK9	Dihydrolipoyl dehydrogenase;Dihydrolipoyl dehydrogenase, mitochondrial	DLD
32.3857	32.6917	32.6462	32.8633	32.7576	32.8999	32.676	32.5815	32.6621	22	59.7	55.52	57935000000	210	A0A024R718;P43490;A0A0C4DFS8;B7Z8W6;Q658Z1;C9JF35;C9JG65	A0A024R718;P43490;A0A0C4DFS8;B7Z8W6	Nicotinamide phosphoribosyltransferase	PBEF1;NAMPT
NaN	25.9031	NaN	NaN	NaN	NaN	NaN	NaN	NaN	2	45.9	7.974	268900000	7	H3BSB6;H3BPV6;H3BUR2;H3BUA4;A0AUM0;H3BNF5;Q68DB5;E7EPZ8;A0A024R719;Q92536	H3BSB6;H3BPV6;H3BUR2;H3BUA4;A0AUM0;H3BNF5;Q68DB5;E7EPZ8;A0A024R719;Q92536	Y+L amino acid transporter 2	SLC7A6;DKFZp686K14185
28.5156	27.5916	27.4789	27.0686	27.6457	27.753	27.3843	27.4801	27.4592	7	7.7	126.41	1796200000	15	A8K9G9;A0A024R720;P48736	A8K9G9;A0A024R720;P48736	Phosphatidylinositol 4,5-bisphosphate 3-kinase catalytic subunit gamma isoform	PIK3CG
27.5122	27.2246	27.7115	26.8334	26.9965	27.0269	27.1214	27.0902	27.0421	4	9.7	63.775	1296900000	20	H3BNC0;A0A024R726;Q9NVM4;A0A024R6Z2;H3BSS9;H3BPZ8;H3BTY1;H3BRD3;H3BNS2;H3BRQ9	H3BNC0;A0A024R726;Q9NVM4;A0A024R6Z2;H3BSS9;H3BPZ8	Protein arginine N-methyltransferase 7	PRMT7
NaN	NaN	NaN	NaN	25.1785	24.8019	NaN	NaN	NaN	2	5.4	57.949	151660000	8	A0A024R732;Q13425;A0A140TA73	A0A024R732;Q13425;A0A140TA73	Beta-2-syntrophin	SNTB2
NaN	25.5761	NaN	NaN	NaN	NaN	NaN	NaN	NaN	3	3.3	157.98	184070000	2	A0A024R734;O94916	A0A024R734;O94916	Nuclear factor of activated T-cells 5	NFAT5
31.0744	31.3174	31.15	31.1131	30.8877	31.1924	31.3121	30.9937	31.2768	6	61.2	13.459	20060000000	56	A0A024R745;Q16718;F8WAS3;A0A087X1G1;H7BYD0;A0A024R772;A0A087WXR5;A0A024R736;C9IZN5	A0A024R745;Q16718;F8WAS3;A0A087X1G1;H7BYD0	NADH dehydrogenase [ubiquinone] 1 alpha subcomplex subunit 5	NDUFA5
NaN	NaN	NaN	NaN	NaN	25.0566	NaN	NaN	NaN	2	3.6	71.877	154660000	0	A0A0C4DG51;A8K6U0;A0A024R746;Q9NP80	A0A0C4DG51;A8K6U0;A0A024R746;Q9NP80	Calcium-independent phospholipase A2-gamma	PNPLA8;IPLA2(GAMMA)
30.4163	30.4136	30.5838	30.3768	30.47	30.4193	30.7054	30.6286	30.4845	17	22.4	85.737	12736000000	94	A0A024R753;Q9NW13;B4DJ90;C9JE21;A0A0S2Z5E5;C9JAA9	A0A024R753;Q9NW13	RNA-binding protein 28	RBM28
NaN	24.1042	NaN	NaN	24.0162	NaN	NaN	NaN	NaN	4	4.6	53.54	96867000	4	A0A024R770;A0A024R774;Q16656;C9JP85	A0A024R770;A0A024R774;Q16656;C9JP85	Nuclear respiratory factor 1	NRF1
28.1294	28.197	28.3704	28.1563	27.9687	28.1544	28.4023	28.4378	28.4862	8	20.2	70.786	2699300000	43	A0A024R781;A0A024R776;A0A024R785;O95628;B3KQ99	A0A024R781;A0A024R776;A0A024R785;O95628	CCR4-NOT transcription complex subunit 4	CNOT4
26.7473	25.8997	26.4021	26.2895	25.4618	25.7612	26.5032	26.2909	26.435	2	17.8	27.991	674020000	14	B3KUR3;A0A024R782;P07738	B3KUR3;A0A024R782;P07738	Bisphosphoglycerate mutase	BPGM
27.025	26.8271	27.3466	26.4446	26.6513	26.6009	27.1653	26.8463	26.9315	5	5.6	107.7	1048600000	18	B4DYZ9;A0A024R784;O15164;Q6ZSA6	B4DYZ9;A0A024R784;O15164	Transcription intermediary factor 1-alpha	TRIM24
31.3042	30.754	31.0139	30.7055	30.3951	30.5767	30.5933	30.5678	30.4958	14	25.2	104.23	15103000000	80	B2R6H7;A0A024R794;Q9Y5L0;C9J7E5;E9PFH4;B3KMX1;B3KM69	B2R6H7;A0A024R794;Q9Y5L0;C9J7E5;E9PFH4	Transportin-3	TNPO3
29.323	NaN	NaN	NaN	NaN	NaN	NaN	NaN	NaN	2	0.8	212.45	1237300000	3	A0A024R7A6;Q9HCM2;A4D1N7	A0A024R7A6;Q9HCM2;A4D1N7	Plexin-A4	PLXNA4B;PLXNA4
NaN	NaN	NaN	NaN	NaN	NaN	NaN	NaN	27.9943	3	16.8	35.853	850780000	4	A0A024R7A8;P15121;Q59EL5;E9PCX2	A0A024R7A8;P15121;Q59EL5;E9PCX2	Aldose reductase	AKR1B1
27.6897	27.8893	28.1402	NaN	NaN	28.032	27.9079	28.4319	28.0151	3	27.4	8.5468	2049500000	16	A0A024R7B0;Q9BZL1;K7EQ43;B2R4N3	A0A024R7B0;Q9BZL1;K7EQ43	Ubiquitin-like protein 5	UBL5
32.0084	32.0805	32.0956	32.1572	31.927	32.1351	32.125	32.1357	32.1298	17	37.8	44.468	38334000000	141	A0A024R7B7;Q16543;Q6FG59;K7EQA9;K7EKQ2;K7EL68;A1L0W4;K7EIU0	A0A024R7B7;Q16543;Q6FG59;K7EQA9;K7EKQ2	Hsp90 co-chaperone Cdc37;Hsp90 co-chaperone Cdc37, N-terminally processed	CDC37
27.3549	27.6165	27.7475	27.8535	27.7251	27.7965	27.7466	28.1419	28.0023	10	17.8	69.666	1940300000	35	A0A024R7C0;Q14145;K7EQX2;K7EJ49;K7EJD8;K7ESE0;K7EPZ3	A0A024R7C0;Q14145	Kelch-like ECH-associated protein 1	KEAP1
26.4372	26.0884	26.4798	26.6783	26.4301	NaN	NaN	26.4711	26.6536	3	7.3	67.423	728590000	9	A0A024R7C4;B4DUT2;Q8N9T8;B7ZLF4;B4DUY9	A0A024R7C4;B4DUT2;Q8N9T8	Protein KRI1 homolog	FLJ12949;KRI1
28.8709	28.8663	28.3676	28.8771	28.7038	28.5875	28.5906	28.6864	28.9189	10	48.6	34.919	3736700000	37	A0A024R7C5;Q9BYD3;K7ES61;K7ELQ0;X6RAY8;K7EKI4;K7ELF1;K7EJ73	A0A024R7C5;Q9BYD3;K7ES61;K7ELQ0;X6RAY8;K7EKI4;K7ELF1	39S ribosomal protein L4, mitochondrial	MRPL4
33.6723	33.7619	33.8433	33.8256	33.8494	33.9136	33.8733	33.9814	33.916	37	60.4	95.337	130640000000	385	A0A024R7C7;Q12906;F4ZW66;F4ZW64;A8K590;F4ZW65;Q59GP7;K7EKJ9;B4DFG4;K7EQR9;B4DDF3;K7ER69;K7EJ09;K7EKY0;K7EM82;K7EPG3;K7ERM6;K7ENK6;K7ELV3;K7EQ75	A0A024R7C7;Q12906;F4ZW66;F4ZW64;A8K590;F4ZW65;Q59GP7	Interleukin enhancer-binding factor 3	ILF3
28.7048	27.8794	28.3223	27.8212	27.0399	27.5225	28.1946	28.4953	28.2879	5	23.8	40.97	2470400000	35	A0A024R7D0;A0A087WZK0;P49366;Q5J8M5;A0A024R7G5;A0A024R7E9;M0R264;M0R253;M0QX43;B4E3M2;M0R0V2;M0R0J4;M0QYZ7;M0R1T4;B4DU50;M0R1T2	A0A024R7D0;A0A087WZK0;P49366;Q5J8M5;A0A024R7G5;A0A024R7E9;M0R264	Deoxyhypusine synthase	DHPS
27.5873	27.1108	27.4689	27.1868	26.5183	26.8162	27.1081	26.7706	27.1585	3	29.2	13.389	1226700000	19	K7EM09;K7EPR0;K7ELQ9;A0A024R7D3;Q6UW68	K7EM09;K7EPR0;K7ELQ9;A0A024R7D3;Q6UW68	Transmembrane protein 205	TMEM205;UNQ501
26.4332	25.9749	26.0585	26.1462	25.7832	26.4605	26.6154	26.8218	26.5926	3	9.7	57.258	722280000	15	A0A024R7E0;Q96RE7	A0A024R7E0;Q96RE7	Nucleus accumbens-associated protein 1	BTBD14B;NACC1
30.7097	31.0173	30.9145	30.7002	30.6168	30.7041	31.145	31.1736	30.9976	28	22.3	189.56	16830000000	148	A0A024R7E3;P26358;Q59FP7;B3KVA0;K7ENW7;K7EJL0;K7EMU8;K7EIZ6	A0A024R7E3;P26358;Q59FP7;B3KVA0	DNA (cytosine-5)-methyltransferase;DNA (cytosine-5)-methyltransferase 1	DNMT1
NaN	24.5755	NaN	NaN	25.0687	NaN	NaN	NaN	NaN	3	3	104.77	181630000	9	B4E123;E9PM19;A0A024R7E4;P29597;Q53HA9;E9PPF2;K7EJR6;H0YE41	B4E123;E9PM19;A0A024R7E4;P29597;Q53HA9;E9PPF2	Tyrosine-protein kinase;Non-receptor tyrosine-protein kinase TYK2	TYK2
32.6646	32.6102	32.681	32.8221	32.6225	32.4694	32.2975	32.3735	32.2435	14	27.3	59.296	52332000000	132	A0A024R7F1;K7ELL7;B4DJQ5;P14314;K7EPW7;A2VCQ4;A0A0S2Z4D8;A0A0S2Z4W7;A0A0S2Z4A0;K7EKX1;K7EJ70;A0A0C4DGP4;K7EIP3	A0A024R7F1;K7ELL7;B4DJQ5;P14314;K7EPW7;A2VCQ4;A0A0S2Z4D8;A0A0S2Z4W7	Glucosidase 2 subunit beta	PRKCSH
NaN	26.8064	27.359	27.5055	27.02	27.2294	26.08	26.2905	26.2704	2	6.7	38.181	992600000	12	C0LQF2;B3KQS9;A0A024R7F4;O00115;K7ENE5	C0LQF2;B3KQS9;A0A024R7F4;O00115;K7ENE5	Deoxyribonuclease-2-alpha	DNASE2
27.9303	27.7104	28.0768	28.0946	27.8682	27.4554	27.6372	27.5577	27.5285	6	23.5	99.665	1930500000	27	B4DRY5;A0A024R7F7;Q4LE60;O14787;A0A075B780;Q05D48;B3KPC8;K7ENW1;K7ESC1;K7ELC3;K7EMA3;K7ESG1	B4DRY5;A0A024R7F7;Q4LE60;O14787;A0A075B780;Q05D48;B3KPC8	Transportin-2	TNPO2;TNPO2 variant protein
29.407	29.012	29.3537	29.5995	29.4822	29.8759	29.7857	29.5337	29.3081	10	37.9	48.127	6412700000	28	A0A024R7F9;Q92947;A0A1L3A5U7;B4DK85;A0A1L3A5T2;A0A1D6XXQ4;B4DUY0;K7EKT3;B4DQF2;K7EQ99;K7ESA6;K7ES74;K7EKH1	A0A024R7F9;Q92947;A0A1L3A5U7;B4DK85;A0A1L3A5T2;A0A1D6XXQ4;B4DUY0	Glutaryl-CoA dehydrogenase, mitochondrial	GCDH
28.7454	28.5101	28.742	28.7172	28.4996	28.6403	28.5758	28.555	28.6157	17	29.6	83.247	3460800000	75	A0A024R7G6;M0R165;A8K5P4;Q9UBC2;A5PKY0;B4DME4;B4DQX5;M0R2S2;M0QX30;M0R1V5;K7EJR2;M0R330;Q69YZ4;M0R3I1	A0A024R7G6;M0R165;A8K5P4;Q9UBC2;A5PKY0;B4DME4;B4DQX5;M0R2S2	Epidermal growth factor receptor substrate 15-like 1	EPS15L1
25.7733	NaN	25.9712	NaN	NaN	NaN	25.8458	NaN	NaN	3	13.1	38.265	269130000	3	H7C1I0;A0A024R7G7;Q96K37;C9JK45	H7C1I0;A0A024R7G7;Q96K37	Solute carrier family 35 member E1	SLC35E1
28.6387	NaN	28.9193	28.5294	28.4185	NaN	29.0348	28.9187	28.6225	4	53.2	14.855	3595700000	10	K7ENJ0;K7ELW1;A8K1J3;A0A024R7G8;P54725	K7ENJ0;K7ELW1;A8K1J3;A0A024R7G8;P54725	UV excision repair protein RAD23 homolog A	RAD23A
27.0417	27.0427	27.0214	27.0062	NaN	27.1372	26.7694	27.0649	26.9185	4	19.5	36.039	1105600000	11	A8K2I7;A0A024R7I0;O14908;K7EM11;A0A024R7I1	A8K2I7;A0A024R7I0;O14908;K7EM11;A0A024R7I1	PDZ domain-containing protein GIPC1	GIPC1
27.8188	27.8952	28.0706	27.9998	27.7793	28.0236	28.3075	28.06	28.0825	4	23.2	23.668	2657400000	33	A0A024R7I3;P61006;H0YLJ8;H0YL94;B3KTE3;H0YMN7;Q59EP4;H0YNE9;B4DMS1;Q92930	A0A024R7I3;P61006	Ras-related protein Rab-8A	RAB8A
30.0141	29.9427	29.946	29.9422	29.8517	29.8756	29.8564	29.8047	29.6701	11	25.7	39.879	8317400000	74	A8K8B9;A0A024R7J0;P17612;B7ZA00;A0A087WVC4;B2RB89;A0A0A0MS54;B4E2L0;P22694;Q15136;K7ERP6;B7Z708;P22612;B1APF7;B1APG1;B1APG0;B1APG2;B1APF8;B1APF9;B1APG3	A8K8B9;A0A024R7J0;P17612;B7ZA00;A0A087WVC4;B2RB89;A0A0A0MS54;B4E2L0;P22694	cAMP-dependent protein kinase catalytic subunit alpha;cAMP-dependent protein kinase catalytic subunit beta	PRKACA;PRKACB
26.6882	26.6576	26.7582	26.5464	26.5909	26.7624	26.811	26.5118	26.8635	2	15.2	10.165	909180000	13	A0A024R7J4;M0R226;Q9BQ48	A0A024R7J4;M0R226;Q9BQ48	Ribosomal protein L34;39S ribosomal protein L34, mitochondrial	MRPL34
29.3626	29.3982	29.3307	29.2752	29.342	29.3918	29.5901	29.617	29.5204	17	41.2	68.062	6174200000	81	A0A024R7K7;A0A024R7M6;Q86YP4;B4DKZ7;B4E0Q6;C9JVY3;V9GY85;H7C3H1;C9JMI3;C9JGN4;C9JHD7;C9JJK9;V9GYX5	A0A024R7K7;A0A024R7M6;Q86YP4;B4DKZ7	Transcriptional repressor p66-alpha	GATAD2A
29.145	29.2418	29.2153	29.5142	28.8568	29.0928	29.1742	28.7914	29.0602	12	35.2	48.56	4931100000	39	B3KNH5;A0A024R7K8;Q59EK3;Q9BXS5;K7EJL1;B4DDG7;E7ENJ6;B4DN99;K7EQX3;K7EPJ8;A0A087WZX7;K7ENA7;Q53GI5;B3KN68;Q9Y6Q5;K7EK69;K7EQ90;K7ERH5;K7ER75;K7EL08;K7EPR4;K7EJJ1;K7EMG5	B3KNH5;A0A024R7K8;Q59EK3;Q9BXS5;K7EJL1;B4DDG7;E7ENJ6;B4DN99	AP-1 complex subunit mu-1	AP1M1
27.657	27.7155	27.9006	27.6578	27.7842	27.8051	27.9071	27.8902	27.9296	6	32.7	28.164	1964400000	28	J3KQS6;A0A024R7L2;Q9NWV8;M0R3H9;M0QXG9;M0R3F4;M0R2A4;M0R2K3;M0R193;M0R0I0	J3KQS6;A0A024R7L2;Q9NWV8	BRISC and BRCA1-A complex member 1	BABAM1;HSPC142
32.4199	32.2783	32.4348	32.5381	32.3262	32.4619	32.3402	32.4315	32.4177	46	48.2	123.03	47758000000	297	A0A024R7L5;A0A024R7L8;Q92900;B3KY55;A0A059XBJ1;A0A059XAJ5;A0A059XAL2;A0A059XG67;A0A059X4U2;Q6ZUC8;A0A059XG73;A0A059XBJ6;A0A059XAM1	A0A024R7L5;A0A024R7L8;Q92900	Regulator of nonsense transcripts 1	UPF1
NaN	24.9093	NaN	NaN	NaN	NaN	NaN	NaN	NaN	2	12.1	28.703	189580000	9	E9PQA6;A8K0C2;A0A024R7L6;Q96EY5;E9PLL0;M0QZK6;E9PLZ8;E9PJW8	E9PQA6;A8K0C2;A0A024R7L6;Q96EY5;E9PLL0;M0QZK6;E9PLZ8;E9PJW8	Multivesicular body subunit 12A	MVB12A;LOC93343
29.2066	29.4363	29.5507	29.4386	29.4693	29.7168	29.5042	29.3738	29.3767	4	22	25.077	6198200000	42	B2R8A2;A0A024R7M0;Q9BVK6;B4DPP4	B2R8A2;A0A024R7M0;Q9BVK6	Transmembrane emp24 domain-containing protein 9	TMED9
NaN	NaN	NaN	24.8852	NaN	NaN	NaN	24.3809	NaN	2	27.1	9.8313	177680000	9	M0R0B4;M0R2G3;M0R228;M0QX74;M0QXP3;A0A024R7M2;Q7Z4E2;M0QY77;Q9BQD3;M0QXN9	M0R0B4;M0R2G3;M0R228;M0QX74;M0QXP3;A0A024R7M2;Q7Z4E2;M0QY77;Q9BQD3;M0QXN9	KxDL motif-containing protein 1	KXD1;MGC2749;MST096
29.4329	29.9562	29.6546	29.531	29.522	29.6775	29.6566	30.0478	30.0457	5	34.1	25.835	7513000000	46	A0A024R7M8;Q96CT7;M0R2F5	A0A024R7M8;Q96CT7	Coiled-coil domain-containing protein 124	LOC115098;CCDC124
NaN	NaN	NaN	23.8251	NaN	NaN	NaN	NaN	NaN	2	2.3	103.7	72467000	1	B4DLZ1;A0A024R7N1;Q9P107;K7EJC2	B4DLZ1;A0A024R7N1;Q9P107;K7EJC2	GEM-interacting protein	GMIP
28.0084	28.4513	28.4732	28.8307	28.5548	28.1769	28.0852	28.3008	28.1504	13	12.7	121.11	2877100000	46	A0A024R7P3;A0A024R7N2;Q9HD20;Q8NC73;Q6ZUA1;Q8TEG5	A0A024R7P3;A0A024R7N2;Q9HD20;Q8NC73	Manganese-transporting ATPase 13A1	ATP13A1
25.3139	NaN	25.5767	25.1089	24.8809	25.0602	24.9782	24.8463	NaN	5	9.1	81.554	284320000	11	A0A024R7N6;O00459;Q96CK7;Q96EV4;Q05BV6;E9PFP1;V9GYJ4	A0A024R7N6;O00459;Q96CK7;Q96EV4;Q05BV6;E9PFP1	Phosphatidylinositol 3-kinase regulatory subunit beta	PIK3R2
29.7337	29.9296	29.9788	30.1913	30.1109	30.0947	30.0795	30.1478	30.0499	7	32.3	38.495	9249700000	58	B2R8G6;A0A024R7P2;Q14318;B7Z6M0;U3KQ64;A0A0A0MTJ1;M0R2K9;U3KQI1;M0R1Q0;M0R1S6;M0R2Q6	B2R8G6;A0A024R7P2;Q14318;B7Z6M0	Peptidyl-prolyl cis-trans isomerase FKBP8	FKBP8
23.9927	NaN	NaN	NaN	24.1088	NaN	NaN	24.7626	NaN	3	21.4	24.51	133030000	7	A0A087WT18;A0A024R7Q7;Q96A73;A0A024R7P4	A0A087WT18;A0A024R7Q7;Q96A73;A0A024R7P4	Putative monooxygenase p33MONOX	KIAA1191
26.485	27.0425	26.7044	27.0824	26.9786	26.9862	27.0803	26.7949	26.4492	6	11.7	79.727	1023200000	16	A0A024R7R0;Q96RL1;D6RC40;D6RCQ3;A0A024R7S2;Q9NTC5	A0A024R7R0;Q96RL1;D6RC40;D6RCQ3;A0A024R7S2	BRCA1-A complex subunit RAP80	RAP80;UIMC1
NaN	27.7087	27.589	27.4142	27.3891	26.5852	26.2623	26.548	26.2069	3	16.1	23.181	1032900000	15	A0A024R7S3;P09497;D6RJD1	A0A024R7S3;P09497;D6RJD1	Clathrin light chain B	CLTB
32.8552	33.0169	33.0481	33.1838	33.1186	33.1877	33.0691	33.2406	33.1962	19	68.4	45.671	77865000000	203	A0A024R7T3;P52597;B4DKS8;A0A1B0GW42	A0A024R7T3;P52597;B4DKS8	Heterogeneous nuclear ribonucleoprotein F;Heterogeneous nuclear ribonucleoprotein F, N-terminally processed	HNRPF;HNRNPF
NaN	26.6146	NaN	NaN	26.6903	NaN	NaN	NaN	NaN	2	11.6	25.915	323910000	7	A0A024R7T4;P17026	A0A024R7T4;P17026	Zinc finger protein 22	ZNF22
33.2692	33.3539	33.3568	33.3519	33.2746	33.4736	33.3875	33.398	33.396	33	51	92.722	92703000000	287	B4DLA6;B3KMX0;A0A024R7U6;P33991;E5RG31;E5RFJ8;A4FS09	B4DLA6;B3KMX0;A0A024R7U6;P33991	DNA replication licensing factor MCM4	MCM4
29.6231	29.679	29.515	29.7055	29.6351	29.8269	29.6652	29.6748	29.6549	10	31.4	51.57	7158300000	63	G3V126;B4E054;A0A024R7X3;A0A024R7U9;Q9UI12;B3KUZ7;Q8TF11;E5RG49;E5RHH0	G3V126;B4E054;A0A024R7X3;A0A024R7U9;Q9UI12;B3KUZ7;Q8TF11	V-type proton ATPase subunit H	ATP6V1H
NaN	24.0263	NaN	NaN	NaN	NaN	NaN	NaN	NaN	2	6.1	51.618	68002000	2	A8K7J8;A0A024R7V2;Q16600	A8K7J8;A0A024R7V2;Q16600	Zinc finger protein 239	ZNF239
30.2333	30.0276	30.2943	30.3821	30.0149	30.026	29.9531	29.8269	30.0052	9	55.7	23.545	9612900000	66	A0A024R7V6;P61019;A0A0A1HAW1;E9PKL7;H7C125;O75546	A0A024R7V6;P61019;A0A0A1HAW1;E9PKL7	Ras-related protein Rab-2A	RAB2;RAB2A
26.4974	26.4049	26.4632	26.2519	26.3046	26.3229	26.4779	26.5547	26.6263	10	4.6	337.57	759170000	35	A0A024R7V7;Q9P2D1;B4DIS0;B7ZML1;Q3L8U1;Q461N2;H3BTW3;B4DR07;H0YJG4;C9JFU2;H7C294;Q6ZWF9;Q5JB41;A0A087WU44;B4DLD8	A0A024R7V7;Q9P2D1;B4DIS0;B7ZML1;Q3L8U1	Chromodomain-helicase-DNA-binding protein 7;Chromodomain-helicase-DNA-binding protein 9	CHD7;CHD9
30.7291	30.6796	30.7378	30.8722	30.7501	30.9506	30.7693	30.7356	30.9143	13	40.7	37.578	15552000000	97	A0A024R7W9;Q92905;Q59GH5;E5RHH5;E5RFS1;E5RG35;E5RK55;E5RHF2;H0UI27	A0A024R7W9;Q92905;Q59GH5	COP9 signalosome complex subunit 5	COPS5
28.5852	28.7152	28.6759	28.644	28.6316	28.9499	28.667	28.6135	28.5809	15	10.9	208.76	3597100000	57	A0A024R7X0;Q9Y6D6;Q59FY5;E5RIF2;B3KMS9;E5RHL7;E5RHZ1;E5RJN9	A0A024R7X0;Q9Y6D6;Q59FY5;E5RIF2	Brefeldin A-inhibited guanine nucleotide-exchange protein 1	ARFGEF1
27.2931	27.3514	27.2478	27.2827	27.1878	27.5543	27.3173	27.1158	27.5513	9	34	38.087	1409100000	17	A0A024R7X6;Q8IZV5;E5RK48	A0A024R7X6;Q8IZV5;E5RK48	Retinol dehydrogenase 10	RDH10
28.0496	27.8654	27.8842	28.2583	28.0709	28.3125	28.1945	28.2197	28.1011	14	35.1	52.009	2437500000	57	A0A0A0MTD1;Q2TBD5;F8VPI7;Q4LE57;E7EPX0;E7EVJ4;E9PH62;A0A0A0MTC5;A0A024R7X7;Q9NUL3;E5RJN7;A0A0A0MTC4;A0A0A0MTC6;A8K276;G5EA18;E7EVI1;B7Z1P6;H0YBY0;E5RJ67;E5RFK1;E5RGQ5;E5RGT3	A0A0A0MTD1;Q2TBD5;F8VPI7;Q4LE57;E7EPX0;E7EVJ4;E9PH62;A0A0A0MTC5;A0A024R7X7;Q9NUL3;E5RJN7;A0A0A0MTC4;A0A0A0MTC6;A8K276;G5EA18;E7EVI1;B7Z1P6	Double-stranded RNA-binding protein Staufen homolog 2	STAU2;STAU2 variant protein
31.1672	31.1182	31.1386	31.1638	30.7976	30.9394	31.3339	31.1643	31.2034	6	71.9	9.9601	19556000000	59	E5RHG8;A0A024R7Y5;Q15369;R4GMY8	E5RHG8;A0A024R7Y5;Q15369;R4GMY8	Transcription elongation factor B polypeptide 1	TCEB1
28.3205	28.3268	28.6011	28.7768	28.6393	29.0217	28.9573	28.7915	29.084	5	28	25.968	3791400000	42	B4DHN5;E9PBU7;B4DQ93;A0A024R7Z5;O00560;G5EA09	B4DHN5;E9PBU7;B4DQ93;A0A024R7Z5;O00560;G5EA09	Syntenin-1	SDCBP
NaN	NaN	NaN	NaN	NaN	NaN	NaN	24.3248	NaN	2	19.2	33.632	113310000	4	C9JSK5;A0A024R802;B4DM81;A8K099;P31321;C9J4C2;C9IZL8;H7BYW5;K7EKR1;Q6NS41;C9JR00	C9JSK5;A0A024R802;B4DM81;A8K099;P31321;C9J4C2;C9IZL8;H7BYW5	cAMP-dependent protein kinase type I-beta regulatory subunit	PRKAR1B
28.4454	28.4355	28.4474	28.4915	28.1596	28.3106	28.8082	28.5345	28.6429	4	50	13.104	3154300000	39	A0A024R806;Q9BT73	A0A024R806;Q9BT73	Proteasome assembly chaperone 3	MGC10911;PSMG3
29.8041	29.53	29.8124	29.7433	29.537	29.6445	29.826	29.6469	29.6163	10	36.8	32.805	7262200000	54	A0A024R811;Q53H82	A0A024R811;Q53H82	Beta-lactamase-like protein 2	LACTB2
33.0656	33.147	33.1996	32.9269	33.2306	33.1431	32.9859	33.1083	33.0689	18	54.1	30.438	77177000000	162	A0A024R814;P18124;A8MUD9;O95036;C9JZ88;C9JIJ5	A0A024R814;P18124;A8MUD9;O95036	60S ribosomal protein L7	RPL7;WUGSC:H_RG054D04.1
27.4798	27.0795	28.4342	27.4021	27.3681	27.5696	27.9527	NaN	28.2032	3	39.7	17.951	1896300000	13	A0A024R819;A0A024R858;P36639	A0A024R819;A0A024R858;P36639	7,8-dihydro-8-oxoguanine triphosphatase	NUDT1
32.6002	32.494	32.4705	32.2456	32.2357	32.4569	32.6991	32.7194	32.5479	31	47.7	92.48	51136000000	187	A0A024R821;P55884;B4DV79;A4D210;B4DXN6;Q96G38;Q59FS8;Q86UM1;C9JZG1;C9JQN7	A0A024R821;P55884;B4DV79;A4D210;B4DXN6;Q96G38	Eukaryotic translation initiation factor 3 subunit B	EIF3S9;EIF3B
NaN	NaN	NaN	NaN	NaN	NaN	NaN	26.0895	NaN	2	12.8	19.512	508350000	7	Q6ZV51;B3KMZ0;A0A024R823;Q9Y4P8	Q6ZV51;B3KMZ0;A0A024R823;Q9Y4P8	WD repeat domain phosphoinositide-interacting protein 2	WIPI2
28.501	28.3479	28.3463	28.3996	28.0457	28.3447	28.8132	28.6201	NaN	3	36.1	16.859	2886100000	19	A0A024R829;Q9NRF9	A0A024R829;Q9NRF9	DNA polymerase epsilon subunit 3	POLE3
28.9298	28.3944	29.1059	28.8116	28.3073	28.7832	29.0302	28.9275	29.083	6	26.4	30.188	4051000000	53	A0A024R830;A0A140VJL8;P29218;H0YBL1;E5RIP7;E5RG13;E5RG94;E5RIF4;E5RHE9;E5RI82;E5RGY4	A0A024R830;A0A140VJL8;P29218;H0YBL1;E5RIP7;E5RG13	Inositol monophosphatase 1	IMPA1
25.6174	25.7302	25.7986	25.3874	25.4984	25.4489	25.078	25.392	25.1951	2	29	11.456	388690000	14	A0A024R838;Q8N0T1	A0A024R838;Q8N0T1	Uncharacterized protein C8orf59	hCG_20884;C8orf59
23.3578	NaN	NaN	NaN	NaN	NaN	NaN	NaN	NaN	3	6	71.988	90368000	4	A0A024R843;Q13049;Q5JVY0	A0A024R843;Q13049;Q5JVY0	E3 ubiquitin-protein ligase TRIM32	TRIM32
30.8977	30.7421	31.0039	30.99	30.9268	30.8559	30.6141	30.8221	30.9007	14	58.6	23.897	16290000000	101	A0A024R845;P61106;X6RFL8	A0A024R845;P61106;X6RFL8	Ras-related protein Rab-14	RAB14
28.7823	28.9614	28.8786	28.7315	28.6441	28.5548	28.9329	28.6981	28.2192	4	22	36.962	3715600000	16	A0A024R850;Q96E11;X6RDS5;A0A024R855	A0A024R850;Q96E11	Ribosome-recycling factor, mitochondrial	MRRF
NaN	NaN	NaN	NaN	NaN	NaN	23.2229	NaN	NaN	2	2	133.28	42919000	5	A0A024R854;Q8TES3;Q9BXL7;H7BY05	A0A024R854;Q8TES3;Q9BXL7;H7BY05	Caspase recruitment domain-containing protein 11	CARD11;FLJ00120
NaN	NaN	NaN	NaN	26.0929	NaN	NaN	NaN	NaN	3	4.8	72.396	118480000	0	B3KTC9;H0Y6I6;A0A024R857;B4DH63;Q96ME1	B3KTC9;H0Y6I6;A0A024R857;B4DH63;Q96ME1	F-box/LRR-repeat protein 18	FBXL18
28.5946	28.3264	28.7945	28.805	28.6931	28.5114	28.303	28.4627	28.7619	8	30.5	35.144	3387100000	38	A0A024R861;O00743;B7Z3E2;Q5T1S7	A0A024R861;O00743;B7Z3E2	Serine/threonine-protein phosphatase;Serine/threonine-protein phosphatase 6 catalytic subunit;Serine/threonine-protein phosphatase 6 catalytic subunit, N-terminally processed	PPP6C
26.9597	25.8036	26.8552	26.6664	26.9702	28.2593	28.158	26.9918	27.6463	8	14.8	83.593	1409400000	16	A0A024R870;Q6UWE0	A0A024R870;Q6UWE0	E3 ubiquitin-protein ligase LRSAM1	LRSAM1
27.497	27.7588	27.6972	27.4559	27.4548	27.484	27.1665	27.2389	27.0844	7	13.9	82.682	1523400000	30	A0A024R872;Q96TA1;Q9H8K1	A0A024R872;Q96TA1	Niban-like protein 1	C9orf88;FAM129B
28.1483	28.1909	28.1564	28.3729	28.3924	28.1667	28.3695	28.2926	28.2962	7	27.7	42.778	2718200000	36	B5BU53;A0A024R880;P50750;B2R9L6;X6RE90	B5BU53;A0A024R880;P50750;B2R9L6	Cyclin-dependent kinase 9	CDK9
28.7384	28.6737	29.0819	29.1454	29.1396	29.4659	28.4909	29.0665	29.013	5	40.9	25.964	4507500000	39	B4E2V5;B4DZK8;A0A024R882;P27105;B4E310;F8VSL7	B4E2V5;B4DZK8;A0A024R882;P27105	Erythrocyte band 7 integral membrane protein	STOM
29.2469	29.5332	29.5074	29.1932	29.4267	29.8025	29.6912	29.8346	29.6498	5	35.6	13.757	6623200000	32	A0A024R883;O75348;F2Z307;O95670	A0A024R883;O75348	V-type proton ATPase subunit G 1	ATP6V1G1
27.414	27.5192	27.4508	27.2122	27.1382	27.523	27.3481	27.3815	27.2744	7	14.1	100.04	1454700000	33	A0A024R885;B7Z3U7;F5H2X7;Q9ULV3;H0Y5D5;Q9BTG3;Q5SYW2;Q96KB7;B4E0A3;F6VD24;B0EXJ7	A0A024R885;B7Z3U7;F5H2X7;Q9ULV3;H0Y5D5;Q9BTG3;Q5SYW2;Q96KB7;B4E0A3	Cip1-interacting zinc finger protein	CIZ1
25.5187	25.929	25.7186	25.6304	25.5983	25.7205	25.2423	25.935	26.2085	6	20.5	36.694	467810000	12	A0A024R886;O95900	A0A024R886;O95900	Probable tRNA pseudouridine synthase 2	TRUB2
31.8753	31.8662	31.9118	31.8592	31.9136	31.8851	31.7111	31.4998	31.7764	63	37	282.25	31530000000	327	A0A024R889;Q13813;A0A0D9SF54;A0A0D9SGF6;B4DGT1;B4DTV8;Q9UG16;Q14917;A0A0D9SFF6;A0A1B0GV13	A0A024R889;Q13813;A0A0D9SF54;A0A0D9SGF6;B4DGT1	Spectrin alpha chain, non-erythrocytic 1	SPTAN1
33.8535	33.5632	33.1847	33.1756	32.9907	32.8441	33.1655	33.1178	32.9463	8	38	31.124	85389000000	92	A0A0C4DFV9;B2RCX0;A0A024R895;Q5VXV3;Q01105;A0A087X027;P0DME0	A0A0C4DFV9;B2RCX0;A0A024R895;Q5VXV3;Q01105;A0A087X027;P0DME0	Protein SET;Protein SETSIP	SET;SETSIP
28.5062	28.3912	28.5459	28.307	28.3067	28.2373	28.098	28.2004	28.2461	9	25.3	43.973	2800800000	45	A0A024R896;B7ZC38;Q9NR46;B7ZC39;F8WFB9;Q71RA6;G5E9J1	A0A024R896;B7ZC38;Q9NR46;B7ZC39	Endophilin-B2	SH3GLB2
29.1115	29.3102	29.3263	29.2715	29.1926	29.4259	29.5748	29.3553	29.5725	4	42.5	16.971	5771800000	22	B3KPC7;A0A024R897;Q9BPX5	B3KPC7;A0A024R897;Q9BPX5	Actin-related protein 2/3 complex subunit 5;Actin-related protein 2/3 complex subunit 5-like protein	ARPC5L
26.4114	NaN	NaN	26.7213	NaN	26.7445	26.7281	NaN	NaN	4	25.5	34.841	791590000	9	A0A0S2Z4Z5;A0A024R8A0;Q7Z6M1;Q5T1S5;A0A0S2Z4Z1	A0A0S2Z4Z5;A0A024R8A0;Q7Z6M1;Q5T1S5;A0A0S2Z4Z1	Rab9 effector protein with kelch motifs	RABEPK
31.4531	31.4812	31.487	31.4185	31.3112	31.324	31.3449	31.3174	31.3378	34	29	166.17	23606000000	172	A0A024R8A2;A0A024R862;Q14C86;A0A024R875;F8W9S7;C9IZ08;B3KN67;B4DK42;B4DGD8;B0QZ65;B3KTX2;H0Y7I9;A0A0A0MQV8;H0Y4E7;C9IZX9;B3KMM3	A0A024R8A2;A0A024R862;Q14C86;A0A024R875;F8W9S7;C9IZ08;B3KN67;B4DK42	GTPase-activating protein and VPS9 domain-containing protein 1	GAPVD1
31.0566	31.2645	31.3368	31.4192	31.452	31.5388	31.5735	31.3628	31.488	26	61	61.64	23662000000	178	A0A024R8A7;Q96I24	A0A024R8A7;Q96I24	Far upstream element-binding protein 3	hCG_31253;FUBP3
26.8385	NaN	27.2056	26.8287	27.4316	27.5628	28.0031	27.9404	27.4377	4	24.1	35.431	1413200000	13	A0A024R8B7;Q6P2C8;U4Q365;B4DPP5	A0A024R8B7;Q6P2C8;U4Q365;B4DPP5	Mediator of RNA polymerase II transcription subunit 27	CRSP8;MED27
NaN	24.3341	NaN	NaN	NaN	NaN	NaN	NaN	NaN	3	10.8	45.622	48834000	3	A0A087WY09;B4DZG2;A0A024R8C1;Q15361	A0A087WY09;B4DZG2;A0A024R8C1;Q15361	Transcription termination factor 1	TTF1
27.4937	27.3671	26.9659	27.5291	27.3148	26.9589	27.0088	26.7489	26.8335	5	17.2	41.506	1258800000	14	Q59F95;A0A024R8C8;Q9NVG8;A0A024R8B1;B4DHM6	Q59F95;A0A024R8C8;Q9NVG8;A0A024R8B1;B4DHM6	TBC1 domain family member 13	TBC1D13
26.3803	26.464	26.5961	26.8094	26.6683	26.7661	26.7398	26.8411	26.6979	6	11.2	72.063	895770000	20	A0A024R8D2;Q6P1M0;B3KQE8;B3KNH1;Q9BTA1	A0A024R8D2;Q6P1M0;B3KQE8;B3KNH1;Q9BTA1	Long-chain fatty acid transport protein 4	SLC27A4
27.5475	27.1623	27.5308	27.5733	27.5896	27.5537	27.5458	27.1527	27.8072	5	16.3	35.552	1591700000	23	A0A024R8D4;Q9Y399;Q5T8A0	A0A024R8D4;Q9Y399	28S ribosomal protein S2, mitochondrial	MRPS2
25.3283	24.9946	25.2145	24.7109	24.9992	24.7893	25.1623	25.0123	25.3027	4	17.3	33.247	295650000	11	Q05BU1;A0A024R8D6;Q6P5Z2	Q05BU1;A0A024R8D6;Q6P5Z2	Serine/threonine-protein kinase N3	PKN3
27.8374	28.0595	28.242	28.2541	27.858	27.8653	28.2729	28.2421	27.9766	5	39	25.387	2393100000	35	A0A024R8E4;Q9BV86;S4R3J7;S4R338;S4R344	A0A024R8E4;Q9BV86	N-terminal Xaa-Pro-Lys N-methyltransferase 1;N-terminal Xaa-Pro-Lys N-methyltransferase 1, N-terminally processed	C9orf32;NTMT1
NaN	NaN	NaN	24.1906	NaN	NaN	NaN	24.4624	NaN	3	2.6	200.01	71347000	4	A0A024R8E8;Q7Z333;A0A0S2Z550;A0A0S2Z520;X6RI79	A0A024R8E8;Q7Z333	Probable helicase senataxin	SETX
NaN	NaN	25.9226	NaN	NaN	NaN	NaN	NaN	NaN	2	7.1	42.953	471190000	1	A0A024R8I4;A0A024R8F1;Q9H257;B4DIK5	A0A024R8I4;A0A024R8F1;Q9H257;B4DIK5	Caspase recruitment domain-containing protein 9	CARD9
NaN	NaN	NaN	NaN	NaN	NaN	NaN	NaN	25.7434	2	20.2	13.596	479380000	1	A0A024R8G6;O43805	A0A024R8G6;O43805	Sjoegren syndrome nuclear autoantigen 1	SSNA1
NaN	NaN	NaN	25.9657	26.1373	NaN	NaN	NaN	NaN	4	10.5	50.605	461910000	4	B4DGI3;A0A024R8H5;Q12933;E5KBQ3	B4DGI3;A0A024R8H5;Q12933;E5KBQ3	TNF receptor-associated factor 2	TRAF2
26.7017	27.2202	26.7646	27.0519	26.8642	27.0996	26.8937	27.1518	27.0729	3	22.7	44.956	1109200000	22	B4DS09;A0A024R8H6;Q15059;A0A140F1N4	B4DS09;A0A024R8H6;Q15059;A0A140F1N4	Bromodomain-containing protein 3	BRD3
31.6362	31.3743	31.4503	31.3804	30.8004	31.1044	31.4945	31.4953	31.5285	15	50	45.209	23590000000	96	A0A024R8I2;A0A140VK64;Q9BSL1	A0A024R8I2;A0A140VK64;Q9BSL1	Ubiquitin-associated domain-containing protein 1	UBADC1;UBAC1
25.8564	26.2635	26.0359	26.2992	26.2853	NaN	NaN	NaN	26.521	4	2.4	219	475140000	13	A0A024R8K8;J3QS41;B7ZLW2;P42694;Q6PGP6;A0A075B6R3;J3KS59;J3KT20;J3QRR8	A0A024R8K8;J3QS41;B7ZLW2;P42694;Q6PGP6;A0A075B6R3	Probable helicase with zinc finger domain	HELZ
30.3079	30.3242	30.4174	30.3266	30.4394	30.5619	30.4672	30.337	30.5225	11	51.2	28.134	11988000000	89	A0A024R8L0;J3QLS3;Q9Y2R9;J3QQS1;J3KSI8;J3QKW2	A0A024R8L0;J3QLS3;Q9Y2R9;J3QQS1;J3KSI8;J3QKW2	28S ribosomal protein S7, mitochondrial	MRPS7
NaN	24.9986	25.6745	25.4493	NaN	26.6241	26.4225	25.8743	26.1198	3	30.6	23.384	486280000	8	B4DFG2;A6NG10;K7EMC9;Q7Z511;A0A024R8L1;Q969T9;K7EIJ0;B4DFL8;B4DV07;K7ENL2;K7EIK1	B4DFG2;A6NG10;K7EMC9;Q7Z511;A0A024R8L1;Q969T9;K7EIJ0;B4DFL8;B4DV07;K7ENL2	WW domain-binding protein 2	WBP2
29.5671	29.6537	29.9822	29.7699	30.1001	30.138	30.0482	30.0688	30.26	12	32	74.685	8784700000	76	A0A024R8L7;A0A024R8T3;Q15067;B4DU07;K7ELT1;I3L0T4;I3L2U4;I3L4S5;K7ENF1;K7ESC7	A0A024R8L7;A0A024R8T3;Q15067;B4DU07	Acyl-coenzyme A oxidase;Peroxisomal acyl-coenzyme A oxidase 1	ACOX1
26.6975	26.9925	26.8344	26.9149	26.8242	27.0697	NaN	26.8737	26.5039	6	20.2	44.049	962430000	7	A0A024R8M0;Q14344;B4DWV9	A0A024R8M0;Q14344;B4DWV9	Guanine nucleotide-binding protein subunit alpha-13	GNA13
27.9733	28.0201	27.879	28.1125	27.5493	27.6308	27.8146	27.5341	27.7583	7	38.8	39.393	1990100000	36	A0A024R8M4;Q14558;B4DP31;C9J168;C9JNQ3	A0A024R8M4;Q14558;B4DP31;C9J168	Phosphoribosyl pyrophosphate synthase-associated protein 1	PRPSAP1
26.1788	26.5005	26.0043	26.1877	25.9911	25.6712	26.2091	25.5671	25.9269	7	10.9	108.83	577360000	21	A5YM55;A0A024R8M9;O94762;B7Z8Y7;A0A024R8S8;B3KQK2;J3KTQ2;Q9BSD6;Q8WYH5;Q9BW80;J3KSL7;J3KSV9;J3KRM6;Q6FIC9;J3KS37	A5YM55;A0A024R8M9;O94762;B7Z8Y7;A0A024R8S8;B3KQK2;J3KTQ2	ATP-dependent DNA helicase Q5	RECQL5
30.0437	31.0711	30.5207	30.522	30.7339	30.0201	29.73	30.402	29.9344	3	38.6	8.2178	12832000000	20	A0A024R8P8;P63173;J3KT73;J3QL01;J3KSP2	A0A024R8P8;P63173;J3KT73;J3QL01	60S ribosomal protein L38	RPL38
26.7121	NaN	NaN	26.4653	NaN	26.5484	26.4173	26.5402	26.3757	3	15.6	33.87	649870000	9	A0A024R8R0;J3QQJ0;Q9UHR5;Q659G6;J3QLM2;J3KRR6;F5H478;B7Z4X9;J3KRU5;X6R3T8;J3QLH3	A0A024R8R0;J3QQJ0;Q9UHR5	SAP30-binding protein	SAP30BP
29.8046	29.9348	29.8077	29.9134	29.9618	29.9438	29.5673	29.6784	29.6456	13	25.2	68.119	8547800000	56	A0A024R8R4;Q8TAT6;B4DG89;I3L4U9;A0A0D9SFI9	A0A024R8R4;Q8TAT6;B4DG89	Nuclear protein localization protein 4 homolog	NPLOC4
26.7884	26.4735	26.4486	27.2132	26.7681	26.9069	26.4628	26.4246	26.5666	4	53.3	10.463	907480000	18	I3L2L5;A0A024R8R5;I3L4Q0;C9JLW8;I3L317;I3L3A7	I3L2L5;A0A024R8R5;I3L4Q0;C9JLW8;I3L317	Protein FAM195B	FAM195B;hCG_1818442
33.4401	33.5977	33.6685	33.8715	33.9742	34.1402	33.8445	33.7376	33.7916	27	57.3	57.116	124640000000	277	A0A024R8S5;P07237;B4DNL5;B4DUA5;H7BZ94;B4DLN6;H0Y3Z3;Q96C96;I3L398;B3KTQ9;I3L312;B4DJS0;I3L4M2;I3NI03;I3L3P5;I3L3U6;I3L0S0;B4DNP9;I3L1Y5;I3L514	A0A024R8S5;P07237;B4DNL5;B4DUA5;H7BZ94;B4DLN6;H0Y3Z3;Q96C96	Protein disulfide-isomerase	P4HB
25.277	25.3481	25.0266	25.0563	NaN	24.9904	25.1173	25.1523	25.176	2	17.8	14.581	288990000	9	K7ELS8;A0A024R8T9;O43760;K7ELD9	K7ELS8;A0A024R8T9;O43760;K7ELD9	Synaptogyrin;Synaptogyrin-2	SYNGR2
31.4802	31.0663	31.3647	31.236	31.3105	31.3957	31.291	31.0958	31.2998	10	55.4	15.156	21891000000	109	J3QL05;J3KP15;Q8NAK9;Q53FN0;A0A024R8U5;Q01130;B3KUY1;B3KX15;Q6NXQ0;Q8N220;B3KVY2;B3KUF7	J3QL05;J3KP15;Q8NAK9;Q53FN0;A0A024R8U5;Q01130;B3KUY1;B3KX15;Q6NXQ0;Q8N220;B3KVY2;B3KUF7	Serine/arginine-rich splicing factor 2	SRSF2;SFRS2
NaN	NaN	NaN	NaN	NaN	NaN	26.2519	25.6921	NaN	3	13	44.839	611510000	9	A0A024R8U8;Q8WVQ1;K7EIP9;K7EQT4;K7EMT2;K7EKT2;K7EKW6;K7EN15	A0A024R8U8;Q8WVQ1	Soluble calcium-activated nucleotidase 1	CANT1
31.7958	31.8198	32.0191	32.3452	32.3552	32.4419	32.0653	31.7286	32.0352	11	45.1	33.39	38037000000	151	E7D7X9;A0A024R8U9;P32322;E2QRB3;E7D7Y0;A0A1B2JLU7;Q8TBX0;Q2TU78;B7Z8T1;J3KQ22;J3QL24;J3QKT4;J3KTA8;J3QKT3;J3QRZ0;J3QLK9;J3QL32;J3QR88;J3QL23	E7D7X9;A0A024R8U9;P32322;E2QRB3;E7D7Y0;A0A1B2JLU7;Q8TBX0;Q2TU78;B7Z8T1;J3KQ22	Pyrroline-5-carboxylate reductase;Pyrroline-5-carboxylate reductase 1, mitochondrial	PYCR1;PIG45
30.9056	31.0376	30.9395	30.9229	30.9028	31.0486	31.1557	31.0872	30.9969	22	52.6	63.633	18021000000	146	A0A024R8V0;A0A0S2Z5A5;Q9UHD8;A0A024R8Q0;A0A0S2Z5W9;Q1WWK5;K7EJ51;K7ER14;K7EL40;K7EJL9;K7EK18;A2VCQ5;K7EJV0;K7EPY1;K7ENL0;B4DTL7;K7ERG1;K7ER52;K7EIE4;K7EQD7;K7EIR4;K7EKN4;K7EN52;K7ENQ5;K7EJZ2;K7ELJ9	A0A024R8V0;A0A0S2Z5A5;Q9UHD8;A0A024R8Q0	Septin-9	2009-09-01
26.3719	27.1569	26.8008	26.7334	26.7033	26.6655	26.7877	26.875	26.6495	7	10.1	104.39	955960000	23	A0A075B784;A0A024R8V6;Q9P275;Q9H9C5;E9PEW0;B3KMW2;K7ERC1;K7ELT3;K7EQS0;K7EPT1;K7ELR5;K7EMM6;Q8IXW9	A0A075B784;A0A024R8V6;Q9P275;Q9H9C5;E9PEW0;B3KMW2	Ubiquitin carboxyl-terminal hydrolase;Ubiquitin carboxyl-terminal hydrolase 36	USP36;DUB1
32.156	32.0073	32.0908	32.3487	32.2619	32.1463	32.2609	32.149	32.3046	18	47.9	46.871	41193000000	155	A0A024R8W0;P38919	A0A024R8W0;P38919	Eukaryotic initiation factor 4A-III;Eukaryotic initiation factor 4A-III, N-terminally processed	DDX48;EIF4A3
NaN	NaN	NaN	NaN	NaN	NaN	NaN	25.0542	NaN	2	4.9	77.035	187780000	1	A0A024R8W1;A4ZI32;Q0VG06;F5GZS4;F5H095;E7EVV8;B3KNQ3	A0A024R8W1;A4ZI32;Q0VG06;F5GZS4;F5H095;E7EVV8;B3KNQ3	Fanconi anemia-associated protein of 100 kDa	C17orf70;FAAP100
27.2676	27.253	27.2944	27.5228	27.2348	27.3829	27.3085	27.2041	27.5169	3	26.5	17.849	1416900000	12	A0A024R8X1;O15525;A0A024R804;A8WFP5;O60675	A0A024R8X1;O15525	Transcription factor MafG	hCG_1991559;MAFG
26.0844	25.8159	26.0132	26.079	25.4075	26.0681	25.4128	25.6619	25.7163	3	11.9	31.182	503930000	16	H0Y645;B4DIJ9;B0QY35;B0QY34;Q59FJ7;B4E0G1;A0A024R8X3;Q5U045;Q53EZ1;B3KRV2;H7BYT1;P48730;P49674;H0Y2N6;J3QQI9;B0QY36	H0Y645;B4DIJ9;B0QY35;B0QY34;Q59FJ7;B4E0G1;A0A024R8X3;Q5U045;Q53EZ1;B3KRV2;H7BYT1;P48730;P49674;H0Y2N6;J3QQI9;B0QY36	Casein kinase I isoform delta;Casein kinase I isoform epsilon	CSNK1E;CSNK1D
27.695	27.854	28.0506	28.0154	27.93	27.5711	28.0132	28.2686	28.0925	7	18.3	54.329	2192200000	27	A0A024R8Y0;Q9BZD4;E9PQC4;B1AQT4;E9PP32;E9PKH1;B1AQT3	A0A024R8Y0;Q9BZD4;E9PQC4;B1AQT4;E9PP32	Kinetochore protein Nuf2	CDCA1;NUF2
25.9539	26.0879	NaN	25.8935	NaN	NaN	26.0344	NaN	NaN	3	9.3	76.474	423480000	13	A0A0P0GE07;A0A024R8Y2;P14859;A0A0C4DG88;B3KRE9;B4DYN6;A0A0A0MT46	A0A0P0GE07;A0A024R8Y2;P14859;A0A0C4DG88;B3KRE9	POU domain protein;POU domain, class 2, transcription factor 1	POU2F1
29.5975	29.3138	29.4504	29.199	29.3526	29.3149	29.5235	29.5211	29.4378	5	44.8	11.681	6012200000	30	Q5R3B4;B2R4Q7;A0A024R8Z5;O95563	Q5R3B4;B2R4Q7;A0A024R8Z5;O95563	Mitochondrial pyruvate carrier 2	MPC2;BRP44
29.8857	29.8068	29.9151	30.0295	30.1732	30.1116	29.8101	29.6688	29.9143	16	35.5	73.574	8543200000	50	A8K4A8;A0A024R8Z9;Q6PI48;Q9H9J7;Q9NVT8;Q9H9M6	A8K4A8;A0A024R8Z9;Q6PI48;Q9H9J7;Q9NVT8	Aspartate--tRNA ligase, mitochondrial	DARS2
34.1653	34.1838	34.1733	34.2016	34.1635	34.3748	34.633	34.5528	34.489	17	53.9	26.182	182270000000	204	Q6NVY0;A0A024R904;Q9HB71;B4DFD3	Q6NVY0;A0A024R904;Q9HB71	Calcyclin-binding protein	CACYBP
27.0832	27.3359	27.5092	27.1122	27.2714	27.2152	27.4627	27.4152	27.7044	3	7.3	81.534	1539700000	15	A0A024R911;Q9UBH6	A0A024R911;Q9UBH6	Xenotropic and polytropic retrovirus receptor 1	XPR1
28.507	28.807	28.7633	28.9476	28.4219	27.9463	28.3454	28.9362	28.6218	10	44.4	29.299	3471300000	34	A0A024R912;Q9BZX2;B4DGD3;A0A0S2Z5Y6;A0A0S2Z601;Q9HA47	A0A024R912;Q9BZX2;B4DGD3	Uridine kinase;Uridine-cytidine kinase 2	UCK2
25.2536	25.7045	25.9046	25.8815	25.5093	25.3454	25.4927	25.8223	25.3914	7	3.5	350.93	431610000	21	A0A024R914;Q5VT06;Q7LGH1;H0Y7F7;Q05D72	A0A024R914;Q5VT06	Centrosome-associated protein 350	CEP350
26.914	NaN	26.3224	26.8948	NaN	25.8695	25.8639	26.3802	NaN	4	19.9	31.136	715100000	10	B2RAA8;A0A024R915;Q9BR61	B2RAA8;A0A024R915;Q9BR61	Acyl-CoA-binding domain-containing protein 6	ACBD6
27.5579	27.373	27.5181	27.4371	27.6514	27.4042	27.5354	27.202	27.4465	5	19.3	46.432	1550900000	14	A0A024R918;O75063;X6RH03	A0A024R918;O75063	Glycosaminoglycan xylosylkinase	FAM20B
NaN	NaN	24.7177	24.7029	24.6037	25.4718	24.653	24.6852	24.5532	2	16.6	21.539	212730000	10	B3KQ87;A0A024R923;Q5T7V8	B3KQ87;A0A024R923;Q5T7V8	RAB6-interacting golgin	SCYL1BP1;GORAB
25.0891	NaN	NaN	NaN	NaN	NaN	NaN	NaN	NaN	2	5	55.399	173460000	5	A0A024R928;O60779;I7BB09;E3UTN9;A0A024R8Y5	A0A024R928;O60779;I7BB09;E3UTN9;A0A024R8Y5	Thiamine transporter 1	SLC19A2
NaN	NaN	NaN	NaN	NaN	24.9072	NaN	NaN	NaN	4	3.2	104.66	159900000	3	A0A024R931;Q9BZQ6;H0Y498	A0A024R931;Q9BZQ6;H0Y498	alpha-1,2-Mannosidase;ER degradation-enhancing alpha-mannosidase-like protein 3	C1orf22;EDEM3
26.9301	27.0926	27.1492	26.7436	26.7823	27.0478	27.0023	26.7492	26.8298	3	26.4	20.058	1072600000	17	Q5W0C6;A0A024R943;Q9H497	Q5W0C6;A0A024R943;Q9H497	Torsin-3A	TOR3A
29.0687	29.4329	29.5397	29.4259	29.5596	29.5518	29.4009	29.5042	29.4811	12	37.9	51.263	6103400000	114	A0A024R957;Q8NFQ8	A0A024R957;Q8NFQ8	Torsin-1A-interacting protein 2	TOR1AIP2
26.163	26.1631	25.8623	26.9533	26.8292	26.5129	26.2063	26.171	25.8566	6	6.2	132.09	711050000	13	A0A024R984;A0A024R962;P08603;A0A0D9SG88;A8K5T0;Q5TFM2;Q8WW96;A0A087WYK9;Q6NSD3;Q02985	A0A024R984;A0A024R962;P08603;A0A0D9SG88;A8K5T0;Q5TFM2	Complement factor H	hCG_40889;CFH
27.0941	26.9762	27.1405	27.6137	27.2977	27.3231	26.798	26.4986	26.5202	8	33.3	40.529	1174500000	21	A0A024R963;A0A024R9A7;B4DZD9;J3KR55;P35236;B4DVF0;H7C5I3;Q8NFX3;E9PE54;E7EUM0;C9JBA9;F8WF66;B4DXH6;C9IYI6;B4DX06;B4DDG6;H7C4T8	A0A024R963;A0A024R9A7;B4DZD9;J3KR55;P35236;B4DVF0;H7C5I3;Q8NFX3;E9PE54;E7EUM0	Protein-tyrosine-phosphatase;Tyrosine-protein phosphatase non-receptor type 7	PTPN7
27.1573	27.1658	26.9459	26.9937	27.0083	27.2086	26.9821	27.2287	27.0111	7	28.5	34.537	1189000000	16	B2R8K8;A0A024R964;Q8TDX7;F8WAG2;F5H3U7;Q5TBH0;Q5TBG1;Q5TBG7;Q5TBH2;Q5TBH1;A0A024R8A6;Q9HC98	B2R8K8;A0A024R964;Q8TDX7;F8WAG2	Serine/threonine-protein kinase Nek7	NEK7
27.0491	27.3267	27.4128	27.0729	27.079	27.3408	27.3182	27.1904	27.1849	2	14.8	20.502	1305400000	16	Q6IAJ3;A0A024R967;Q6FIF9;B1ALM5;B4E1H4;Q9P0T7	Q6IAJ3;A0A024R967;Q6FIF9;B1ALM5;B4E1H4;Q9P0T7	Transmembrane protein 9	TMEM9
27.0491	27.0406	27.4876	27.356	27.0585	27.1901	26.715	26.7971	26.7598	10	12.7	133.87	1188300000	38	Q68DH9;A0A024R968;P23634;A8K8U3;A7E2D8;Q4J697;H0Y7S3;A0A024R2E4;Q4LE63;A0A024R2K6;Q16720;Q01814;A1X4Q1;A1X4P8;A1L3B5;A1X4P7;H0YDG5;A1X4Q2;H7BZS8;A2VBC8;H7BY13;H0YHH6;A1X4Q0;Q3L582;A0A0U1RQU3;A1X4P9	Q68DH9;A0A024R968;P23634;A8K8U3;A7E2D8	Calcium-transporting ATPase;Plasma membrane calcium-transporting ATPase 4	DKFZp686M088;ATP2B4
28.9809	29.0267	29.1425	29.2343	30.0154	30.1463	28.8227	28.5048	29.2654	14	17	103.13	5544200000	59	A0A024R978;Q9BZQ8	A0A024R978;Q9BZQ8	Protein Niban	C1orf24;FAM129A
31.9321	31.8965	31.9265	32.0762	31.827	31.8689	31.9665	31.8591	31.9228	23	46.1	60.67	34045000000	208	A0A024R983;P10155;B3KN94;H0Y9N5;G5E9R9;D6RDN1;D6RE09	A0A024R983;P10155	60 kDa SS-A/Ro ribonucleoprotein	TROVE2
29.2625	29.4371	29.4773	29.449	29.2291	29.4711	29.7254	29.5105	29.681	10	22.3	60.13	6280200000	63	A0A024R994;O75131;Q05DL8;H0YB26;A0A087WYQ3;E5RHZ0;A0A087WXR6	A0A024R994;O75131;Q05DL8;H0YB26;A0A087WYQ3	Copine-3	CPNE3
26.8656	26.7568	26.7904	26.6655	26.5699	26.7561	27.2712	27.5402	27.0613	3	20.8	22.521	1115500000	15	A0A024R9A9;Q9NPD8	A0A024R9A9;Q9NPD8	Ubiquitin-conjugating enzyme E2 T	UBE2T
28.1944	28.046	28.4839	28.3098	28.2261	28.4522	28.6265	28.5775	28.466	10	24.3	59.152	2968500000	43	A0A024R9B5;Q15291;B4DLF8;B4DMM7	A0A024R9B5;Q15291;B4DLF8;B4DMM7	Retinoblastoma-binding protein 5	RBBP5
26.9679	28.2305	28.398	27.8869	28.3525	28.7912	28.3735	28.1254	28.3931	2	18.7	8.7813	2630200000	22	A0A024R9B7;P09669	A0A024R9B7;P09669	Cytochrome c oxidase subunit 6C	COX6C
NaN	NaN	NaN	NaN	NaN	NaN	NaN	NaN	25.416	3	28.5	14.594	351490000	2	E5RH35;E5RJZ7;E5RJP8;E5RJA8;A0A024R9B8;Q9Y646;B4DJC2	E5RH35;E5RJZ7;E5RJP8;E5RJA8;A0A024R9B8;Q9Y646	Carboxypeptidase Q	CPQ;PGCP
34.3909	34.3002	34.3948	34.2184	34.1751	34.2589	34.368	34.4285	34.3396	34	51.9	70.67	180360000000	422	A0A024R9C1;P11940;A0A087WTT1;E7EQV3;E7ERJ7;B4DQX0;B3KT93;B4DZW4;A0A024R9E2;Q2VIP3;Q5VX58;Q3ZCS4;Q9H361;H0YBN4;E5RJB9;H0YAS6;H0YB75;E5RGH3;E5RH24;Q4VXU2;H0YB86;H0YAP2;H0YAS7;E5RHG7;H0YC10;E5RFD8;Q5JQF8;E5RGC4;L0R533;H0YAW6;A8K8J2	A0A024R9C1;P11940;A0A087WTT1;E7EQV3;E7ERJ7;B4DQX0;B3KT93;B4DZW4;A0A024R9E2	Polyadenylate-binding protein;Polyadenylate-binding protein 1	PABPC1
NaN	NaN	NaN	24.5337	NaN	NaN	NaN	NaN	NaN	2	13.7	21.01	49352000	1	B4DUQ5;B3KWP3;A0A024R9D0;Q9H2D1	B4DUQ5;B3KWP3;A0A024R9D0;Q9H2D1	Mitochondrial folate transporter/carrier	SLC25A32
30.3222	30.338	30.3721	30.5279	30.2832	30.4058	30.2787	30.3269	30.1267	10	24.1	63.836	11323000000	90	A0A024R9D2;Q86UE4;E5RJU9;H0YBJ8;H0YB56	A0A024R9D2;Q86UE4;E5RJU9	Protein LYRIC	MTDH
32.2852	32.5688	32.5317	32.6069	32.6935	32.634	32.5458	32.4799	32.6664	8	66.7	12.656	52861000000	71	E5RI99;A0A024R9D3;P62888;A0A0B4J213;A0A0C4DH44;E5RJH3	E5RI99;A0A024R9D3;P62888	60S ribosomal protein L30	RPL30
31.4151	31.3177	31.5966	31.9039	31.8302	31.9811	31.492	31.2653	31.5937	10	37.6	36.067	27668000000	88	A0A024R9D7;Q16698;E5RJG7;Q7LDK6;E5RFV2;E5RJD2;E5RID6;H0YAW3	A0A024R9D7;Q16698;E5RJG7;Q7LDK6;E5RFV2	2,4-dienoyl-CoA reductase, mitochondrial	DECR1;DECR
28.9461	28.9567	29.0089	28.7353	29.0893	29.2382	29.3974	29.699	29.4042	4	38.6	11.528	5141400000	32	A0A024R9D9;Q9NPA8;E5RHX8;J3KNT2;E5RI00;E5RHT9;E5RJ84	A0A024R9D9;Q9NPA8;E5RHX8	Transcription and mRNA export factor ENY2	ENY2
NaN	NaN	NaN	NaN	NaN	NaN	25.4436	26.2491	25.6405	2	4.6	98.071	282780000	9	A8K0G7;A0A024R9F1;Q9UKY1	A8K0G7;A0A024R9F1;Q9UKY1	Zinc fingers and homeoboxes protein 1	hCG_2044510;ZHX1
NaN	NaN	NaN	25.5054	NaN	NaN	NaN	NaN	NaN	3	17.9	17.221	135660000	1	E5RGY0;B4E1G1;A0A024R9G3;Q9BUN8	E5RGY0;B4E1G1;A0A024R9G3;Q9BUN8	Derlin-1	DERL1
31.5002	31.3548	31.5761	31.5894	31.5651	31.5046	31.2364	31.3106	31.3157	17	63.9	36.748	24419000000	155	A0A024R9G4;Q9NUQ9;Q68D08;E5RI16;A0A1W2PRQ0;E5RJE1;E5RIR8;E5RJL8;A0A087X178;Q3ZTR9;E5RGI7;E5RFS4;E5RHU5;E5RK61;E5RK81;E5RH75	A0A024R9G4;Q9NUQ9;Q68D08;E5RI16;A0A1W2PRQ0	Protein FAM49B	FAM49B;DKFZp686B04128
28.5854	28.3725	28.549	29.0637	28.7984	29.0427	29.1421	29.0241	29.1033	17	16.3	158.55	4133500000	48	A0A024R9G7;Q6PL18;A0A0B4J211	A0A024R9G7;Q6PL18;A0A0B4J211	ATPase family AAA domain-containing protein 2	ATAD2
27.8081	26.9063	NaN	27.0435	26.7405	NaN	26.9658	NaN	NaN	3	32.8	14.494	720000000	9	A0A024R9H2;P52758;H0YBX3;H0YB34	A0A024R9H2;P52758;H0YBX3;H0YB34	Ribonuclease UK114	HRSP12
29.0811	29.2153	29.2962	29.1845	29.3288	29.2203	28.9216	29.1307	29.2338	13	28	43.941	5185600000	77	A0A024R9I0;P21283;E7EV59;B7Z593	A0A024R9I0;P21283;E7EV59;B7Z593	V-type proton ATPase subunit C 1	ATP6V1C1
26.4091	26.7929	26.7977	26.8406	26.8985	26.9221	25.7599	26.0622	26.2837	7	34.7	35.226	831730000	26	Q8N959;B3KU62;A0A024R9I3;Q597H1;Q92597;B3KWB2;B7Z505;Q53EU7;E7ESM1;B7Z5Z7;E5RJY1;B7Z4H0;E5RI76;E5RH82;E5RIR1;E5RGM5;E5RK17;E5RIV1;E5RIM2	Q8N959;B3KU62;A0A024R9I3;Q597H1;Q92597;B3KWB2;B7Z505;Q53EU7;E7ESM1;B7Z5Z7	Protein NDRG1	NDRG1;TRG14
NaN	25.4661	25.5136	25.6027	25.3557	NaN	25.4812	25.3632	25.3611	3	4.3	99.26	379280000	11	Q5HYC7;H0YMQ9;H0YKQ8;Q3ZCQ6;Q6NSI7;A0A024R9K8;A8K935;A0A024R9I5;Q9UHW9;B3KXX3;H0YKE6;I3L4N6;B4DF30;Q9UP95	Q5HYC7;H0YMQ9;H0YKQ8;Q3ZCQ6;Q6NSI7;A0A024R9K8;A8K935;A0A024R9I5;Q9UHW9;B3KXX3	Solute carrier family 12 member 6	DKFZp686O1827;SLC12A6
28.3638	28.5594	28.3216	28.5477	28.481	28.4721	28.6099	28.6952	28.413	10	19.8	71.689	3174000000	69	A0A024R9J0;O60216;B3KUT8;E5RG18;E5RI01;E5RFZ5;E5RJW1;E5RJK5;E5RFV8;E5RIN7;F6KSS9;Q9H4I0;A0A140T8W2	A0A024R9J0;O60216;B3KUT8	Double-strand-break repair protein rad21 homolog	RAD21
NaN	25.5846	NaN	NaN	NaN	NaN	NaN	NaN	NaN	3	18.7	21.807	151370000	8	E5RFJ1;A0A024R9J6;Q96MF7;H0YB96;E5RIM1;A0A087WTZ8;E5RHW9	E5RFJ1;A0A024R9J6;Q96MF7	E3 SUMO-protein ligase NSE2	NSMCE2;C8orf36
NaN	NaN	NaN	NaN	NaN	NaN	NaN	24.3414	NaN	2	4.5	61.728	55877000	2	A0A024R9J7;Q9BVC3	A0A024R9J7;Q9BVC3	Sister chromatid cohesion protein DCC1	DCC1;DSCC1
27.4443	27.4629	27.6766	27.7896	27.9939	27.8905	27.9332	27.4098	27.6751	9	27.4	35.818	1929900000	26	A0A024R9K4;Q96QD9;H9KVC6;H9KVC1;H9KVD1	A0A024R9K4;Q96QD9;H9KVC6	UAP56-interacting factor	FYTTD1
28.31	28.0418	28.2799	28.5019	28.3952	28.5876	28.3492	28.2613	28.2466	3	22.4	20.885	2837400000	19	H0YDT8;A0A024R9K7;Q9NPA0;H0YDX2	H0YDT8;A0A024R9K7;Q9NPA0	ER membrane protein complex subunit 7	EMC7;C15orf24
27.0659	27.044	27.2358	27.1449	27.1129	27.0222	27.0415	26.9489	27.2501	5	25.1	37.763	1200400000	26	A0A024R9L0;Q9Y375;H0YL22;H0YNN4;H0YNB7	A0A024R9L0;Q9Y375;H0YL22;H0YNN4;H0YNB7	Complex I intermediate-associated protein 30, mitochondrial	NDUFAF1
29.5015	29.6043	29.7101	29.7557	29.5557	29.5839	29.7419	29.8219	29.6663	21	18.4	156.84	7168300000	92	B0AZM4;A8K6F0;A0A024R9L1;O60306;H0YH15;H0YLN9	B0AZM4;A8K6F0;A0A024R9L1;O60306	Intron-binding protein aquarius	AQR
27.9358	28.0544	28.398	28.3219	28.4453	28.2109	28.2196	28.1256	28.2862	12	16.6	100.77	2619500000	39	A0A024R9L9;Q96JC1;B3KY10	A0A024R9L9;Q96JC1	Vam6/Vps39-like protein	VPS39
28.0258	27.787	28.1	27.9013	27.4574	27.6385	27.9455	27.4911	27.7163	5	39.2	16.324	1955300000	25	H3BSW0;A0A024R9M3;Q8N9N7	H3BSW0;A0A024R9M3;Q8N9N7	Leucine-rich repeat-containing protein 57	LRRC57
28.9353	29.6061	29.3101	29.3226	29.5753	29.2581	29.615	29.0605	29.3409	3	20	22.456	5733400000	35	A0A024R9M9;Q99653;H0YKE7;F5GX29;B4DSB5;H0YNG9;H0YLX1;H0YLY7	A0A024R9M9;Q99653;H0YKE7;F5GX29;B4DSB5;H0YNG9	Calcineurin B homologous protein 1	CHP;CHP1
26.4955	NaN	NaN	NaN	NaN	NaN	NaN	NaN	NaN	2	15.7	24.691	202170000	3	A0A024R9N0;O43482;H0YKL4	A0A024R9N0;O43482;H0YKL4	Protein Mis18-beta;Protein yippee-like	OIP5
NaN	NaN	NaN	NaN	NaN	26.8489	26.8566	26.9755	26.7321	3	47.2	7.8036	950490000	12	S4R329;H0YK61;H0YNK0;H0YNK8;A0A0S2Z598;A0A024R9N3;Q5J8M3;H0YLP8;H0YMH5	S4R329;H0YK61;H0YNK0;H0YNK8;A0A0S2Z598;A0A024R9N3;Q5J8M3;H0YLP8	ER membrane protein complex subunit 4	EMC4;TMEM85
NaN	27.3627	27.8267	NaN	NaN	NaN	27.1234	27.1878	27.2099	7	20.9	61.155	1253000000	11	A8K9B9;A0A024R9N6;Q9H223	A8K9B9;A0A024R9N6;Q9H223	EH domain-containing protein 4	EHD4
NaN	NaN	NaN	NaN	NaN	NaN	NaN	24.8056	NaN	2	8.9	26.933	129280000	2	A0A024R9P0;Q9NVX0;J3QT48;H3BP24;H3BP16;A0A024R9M5;H3BQU2	A0A024R9P0;Q9NVX0;J3QT48;H3BP24;H3BP16;A0A024R9M5;H3BQU2	HAUS augmin-like complex subunit 2	CEP27;HAUS2
29.2074	29.425	29.2407	29.096	29.2954	29.3035	29.422	29.0253	29.2458	16	36.6	52.118	5354100000	49	A0A024R9P6;Q96TC7;B3KUI4;H0YLG5;H0YMB1;H0YNE5	A0A024R9P6;Q96TC7;B3KUI4;H0YLG5;H0YMB1	Regulator of microtubule dynamics protein 3	FAM82C;RMDN3
26.8681	26.5216	NaN	NaN	26.4325	NaN	NaN	NaN	26.2236	7	8.9	110.18	806500000	10	A0A024R9R3;Q9P253;H0YMC9;H0YLM6	A0A024R9R3;Q9P253	Vacuolar protein sorting-associated protein 18 homolog	VPS18
NaN	NaN	NaN	NaN	25.645	NaN	NaN	NaN	NaN	3	3.2	210.23	230690000	4	A0A024R9R5;Q9H2Y7;H3BNX5;B4DGC7;H3BRD4;Q86T35;H3BS99;A0A0C4DGM5	A0A024R9R5;Q9H2Y7;H3BNX5;B4DGC7	Zinc finger protein 106	ZFP106;ZNF106
NaN	NaN	NaN	NaN	NaN	NaN	NaN	NaN	24.6278	3	3.4	151.86	128150000	3	A8K2V6;A0A024R9R7;Q9ULG1;H0YMN5;H0YNL3;Q6N074;A0A087X0U7;Q9NUK2	A8K2V6;A0A024R9R7;Q9ULG1;H0YMN5	DNA helicase INO80	INOC1;INO80
30.313	31.2227	30.5087	30.1666	31.3443	29.3068	28.7962	29.5649	29.6585	5	33	21.258	11149000000	47	A0A024RAE4;A0A024R9T1;B4E1U9;P60953;Q5JYX0;Q9UJM1;A0A024RAE6;B7ZAY4;B4DMH5;Q9UJM0	A0A024RAE4;A0A024R9T1;B4E1U9;P60953;Q5JYX0;Q9UJM1;A0A024RAE6;B7ZAY4;B4DMH5;Q9UJM0	Cell division control protein 42 homolog	CDC42;hCG_39634
NaN	NaN	NaN	NaN	NaN	NaN	NaN	NaN	25.4471	4	8.5	74.327	233220000	8	A0A024R9T3;Q8N442	A0A024R9T3;Q8N442	Translation factor GUF1, mitochondrial	GUF1
29.583	29.8431	29.9131	29.6725	29.593	29.9532	30.0937	29.965	30.01	2	25	16.797	8170200000	34	A4D2P2;A0A024R9T5;A4D2P1;A4D2P0;P63000	A4D2P2;A0A024R9T5;A4D2P1;A4D2P0;P63000	Ras-related C3 botulinum toxin substrate 1	RAC1;hCG_20693
27.7031	27.7187	27.9548	27.748	27.742	27.8503	27.9008	28.2047	27.9278	10	21.9	62.543	2060800000	38	A0A024R9T6;Q9P270;D6RIF6;Q9H705;D6REM5;H0Y9L2	A0A024R9T6;Q9P270;D6RIF6	SLAIN motif-containing protein 2	hCG_17415;SLAIN2
30.5045	29.1523	29.836	29.5875	29.2371	29.3167	29.2213	29.2805	29.4037	3	33.9	19.023	6692200000	34	D6RG39;D6RIT9;A0A024R9U3;Q9NX40;D6R918;D6RBC5;D6RDI5;D6RA54;D6RC55;D6RF07;D6RI08;D6RDK1;B4DND1;D6RIV2;D6R9T5;D6RDK6;D6RBN5	D6RG39;D6RIT9;A0A024R9U3;Q9NX40;D6R918;D6RBC5;D6RDI5;D6RA54;D6RC55	OCIA domain-containing protein 1	OCIAD1
30.9462	30.9756	30.9263	31.0215	30.9642	31.0215	31.0109	31.0492	30.9479	53	18.2	480.15	17945000000	237	A0A024R9Y3;A0A024R9U8;A0A024R9W5;Q7Z6Z7;Q5H924;Q5H962;Q5H935;H0Y659;B4DGF6;Q53FW4;Q5H964;A0A087X1S3;A0A087X146;Q3B7K0;A0A1B0GXC7;Q5H963;Q8IWJ0	A0A024R9Y3;A0A024R9U8;A0A024R9W5;Q7Z6Z7;Q5H924	E3 ubiquitin-protein ligase HUWE1	HUWE1
NaN	NaN	NaN	NaN	NaN	NaN	NaN	26.5005	NaN	2	15.2	20.894	463680000	4	A0A024R9U9;Q969E8	A0A024R9U9;Q969E8	Pre-rRNA-processing protein TSR2 homolog	RP1-112K5.2;TSR2
NaN	NaN	NaN	NaN	NaN	NaN	NaN	NaN	23.9019	2	5.7	60.741	104920000	4	A0A024R9V7;Q8IWE2;B3KSS5;B4DL61;B4E1Z8	A0A024R9V7;Q8IWE2;B3KSS5;B4DL61;B4E1Z8	Protein NOXP20	LOC92689;FAM114A1
NaN	NaN	24.9889	NaN	25.0217	NaN	25.2218	NaN	NaN	2	10.8	41.911	214250000	7	A0A024R9W0;O43766;D6RCP8;A0A1W2PNQ5;A0A1W2PRE7;A0A1X7SBR7;A0A1W2PPM2	A0A024R9W0;O43766;D6RCP8;A0A1W2PNQ5;A0A1W2PRE7;A0A1X7SBR7;A0A1W2PPM2	Lipoyl synthase, mitochondrial	LIAS
NaN	NaN	NaN	NaN	NaN	NaN	NaN	23.3401	NaN	2	6.1	43.987	106170000	4	D6R9D6;A0A024R9W3;B7Z8Z7;B7ZLP7;A0AV96;D6REZ6;D6RBS9	D6R9D6;A0A024R9W3;B7Z8Z7;B7ZLP7;A0AV96;D6REZ6;D6RBS9	RNA-binding protein 47	RBM47;FLJ20273
28.0885	26.8264	27.4281	27.7703	26.8332	26.74	27.1236	26.7371	26.5114	6	22.1	25.223	1311400000	26	D6RAA6;A6QKW0;A0A024R9W7;P57088;H0Y8N0	D6RAA6;A6QKW0;A0A024R9W7;P57088;H0Y8N0	Transmembrane protein 33	TMEM33;SHINC3
26.4053	26.5605	25.9938	26.1975	26.2913	26.2146	26.5653	26.477	26.5425	5	9	120.85	732360000	11	A0A0G2JNB1;A0A0G2JQF4;A0A0G2JNT7;A0A024R9Y2;I3L233;A0A1W2PPV8;A0A1W2PRB5;A0A0J9YVS1;A0A0G2JQF5;Q7Z3B3;A0A1W2PQT4;A0A0G2JRW7;I3L243	A0A0G2JNB1;A0A0G2JQF4;A0A0G2JNT7;A0A024R9Y2;I3L233;A0A1W2PPV8;A0A1W2PRB5;A0A0J9YVS1;A0A0G2JQF5;Q7Z3B3	KAT8 regulatory NSL complex subunit 1	KIAA1267;KANSL1
26.8658	26.526	26.5699	26.4822	26.4545	26.2828	26.3197	26.5713	26.1108	7	12.7	65.352	788110000	7	Q05DU1;A0A024R9Y6;Q9NVN8	Q05DU1;A0A024R9Y6;Q9NVN8	Guanine nucleotide-binding protein-like 3-like protein	GNL3L
28.7381	28.7307	28.6892	29.2144	29.2075	29.3127	28.8163	28.8294	28.7287	13	29.1	63.138	4285400000	66	Q5H909;A0A024R9Y7;Q9UNF1;B4DX55;Q5H907;B4DWM5;B4DNG7;Q9BX88;Q9BX89;A0A087X070;Q9NVY3;Q9BX91;G5E9N2;Q9BX90;A0A024R9X0;B4DS47;B4DK08;Q12816;A0A024R254;Q9Y5V3	Q5H909;A0A024R9Y7;Q9UNF1;B4DX55;Q5H907	Melanoma-associated antigen D2	MAGED2
24.7706	24.0167	24.6369	24.0514	24.0143	24.0507	23.6526	23.9037	NaN	2	11.7	27.811	149090000	10	Q5JZB8;A0A024R9Y9;Q9BPZ2;Q5JZB7;A0A024R9W1;Q99865	Q5JZB8;A0A024R9Y9;Q9BPZ2;Q5JZB7;A0A024R9W1;Q99865	Spindlin-2B;Spindlin-2A	SPIN2B;SPIN-2;SPIN2;SPIN2A
28.0604	26.5512	28.8625	29.5072	29.4828	29.3846	29.1841	29.6005	29.0259	3	25.9	9.3697	4693800000	11	A0A024R9Z0;O00483	A0A024R9Z0;O00483	Cytochrome c oxidase subunit NDUFA4	NDUFA4
28.4112	28.4566	28.3461	28.4508	28.2731	28.2884	28.502	28.3454	28.2852	10	33.3	49.351	2914900000	35	B3KN56;B3KM88;A0A024R9Z6;Q8IV38;G3V0G5;F8WB95	B3KN56;B3KM88;A0A024R9Z6;Q8IV38;G3V0G5	Ankyrin repeat and MYND domain-containing protein 2	ANKMY2
25.3626	25.4782	25.4683	25.5761	25.5603	25.4305	25.2205	NaN	25.2755	2	17.4	17.09	354240000	7	B4DSE3;B4DSB3;B3KTM0;I3L170;A0A024RA19;A0A024R9Y0;A0A024RA17	B4DSE3;B4DSB3;B3KTM0;I3L170;A0A024RA19;A0A024R9Y0;A0A024RA17	Microtubule-associated protein	MAPT
26.2147	26.5337	26.561	26.5111	26.5193	26.633	26.4984	26.6629	26.4121	6	9.9	98.636	799380000	27	B4DGE7;A0A024RA24;Q9NXC5	B4DGE7;A0A024RA24;Q9NXC5	WD repeat-containing protein mio	FLJ20323;MIOS
28.564	28.9483	29.04	28.8663	28.9572	29.1891	29.013	29.0472	29.1292	8	23.3	61.116	4386100000	32	A0A024RA25;Q9NZW5;B8ZZG1;C9J4Q3;C9JGI8	A0A024RA25;Q9NZW5;B8ZZG1;C9J4Q3	MAGUK p55 subfamily member 6	MPP6
27.0081	27.1379	27.0763	27.174	26.8289	27.2783	NaN	27.3555	27.1012	6	18.5	71.947	1183200000	12	A0A024RA36;Q8NBF6;H7C0I1;B8ZZW5;A0A024RA79;A0A1W2PRP5;Q8N6Z3	A0A024RA36;Q8NBF6;H7C0I1;B8ZZW5;A0A024RA79;A0A1W2PRP5;Q8N6Z3	Late secretory pathway protein AVL9 homolog	KIAA0241;AVL9
NaN	NaN	NaN	NaN	NaN	NaN	23.2942	NaN	NaN	2	3	71.33	40041000	2	A0A024RA38;Q8IY47;A0A087WXP9;Q9P097	A0A024RA38;Q8IY47;A0A087WXP9;Q9P097	Kelch repeat and BTB domain-containing protein 2	KBTBD2
30.8026	30.6953	30.6259	30.5174	30.5138	30.4581	30.5868	30.7367	30.79	16	41.9	46.913	14083000000	107	E7ETZ4;B3KM68;A0A024RA42;Q9Y6E2;Q75MG1;B7Z4K8;B5MCH7;B5MCE7;E9PFD4;E9PFE3;C9JF98;F8WDX8;E7EMS9;B7Z6N5	E7ETZ4;B3KM68;A0A024RA42;Q9Y6E2;Q75MG1;B7Z4K8;B5MCH7;B5MCE7;E9PFD4	Basic leucine zipper and W2 domain-containing protein 2	BZW2
27.5138	27.269	27.7549	27.2588	27.2258	27.5366	28.1625	27.8392	27.6016	12	17.4	124.2	1718300000	30	A0A024RA49;Q9NQW6;A8K5D9;B4DSL6;C9JJT6;H7C1K5;H7C1C2;H7C3S1	A0A024RA49;Q9NQW6;A8K5D9;B4DSL6	Actin-binding protein anillin	ANLN
32.9144	32.9803	32.8325	32.7928	32.7054	32.9104	32.8104	32.7065	32.9789	12	62.8	25.898	65145000000	119	A0A024RA52;P25787;Q53GF5;C9JCK5;H3BT36;Q6MZI6;H7C402	A0A024RA52;P25787;Q53GF5;C9JCK5	Proteasome subunit alpha type;Proteasome subunit alpha type-2	PSMA2
26.4831	26.4321	26.8316	26.9944	26.5841	26.6209	26.5081	26.5496	27.1143	7	10.1	158.43	911490000	13	A0A024RA66;A0A024RA85;Q14004;A0A087X209;Q9BVE2	A0A024RA66;A0A024RA85;Q14004;A0A087X209	Cyclin-dependent kinase 13	CDC2L5;CDK13
NaN	NaN	NaN	25.8855	NaN	NaN	NaN	NaN	NaN	2	4.6	100.25	207780000	2	B7Z7T1;B2RAT5;A0A024RA74;Q8TCY9	B7Z7T1;B2RAT5;A0A024RA74;Q8TCY9	Up-regulator of cell proliferation	URG4;URGCP
28.8103	28.2291	28.1695	28.3697	28.3843	28.3984	28.0747	27.9244	28.0982	3	14.6	35.329	2767500000	23	A0A024RA75;P31937;H7BZL2	A0A024RA75;P31937	3-hydroxyisobutyrate dehydrogenase;3-hydroxyisobutyrate dehydrogenase, mitochondrial	HIBADH
NaN	NaN	NaN	NaN	NaN	NaN	NaN	NaN	24.7365	2	20.9	19.857	47541000	2	C9JJ39;C9J3F5;C9JPX5;C9JKL2;A0A024RA89;O95772	C9JJ39;C9J3F5;C9JPX5;C9JKL2;A0A024RA89;O95772	MLN64 N-terminal domain homolog	STARD3NL
NaN	NaN	NaN	NaN	NaN	NaN	NaN	NaN	24.8774	2	15.1	28.899	160900000	2	B7Z8S4;A0A024RAA0;Q969V5;B4DE24	B7Z8S4;A0A024RAA0;Q969V5;B4DE24	Mitochondrial ubiquitin ligase activator of NFKB 1	C1orf166;MUL1
NaN	NaN	NaN	NaN	NaN	NaN	24.0838	NaN	NaN	3	5.8	83.573	43497000	2	B4DKB2;A0A024RAB0;A0A024RAB2;A0A024RAF7;P42892	B4DKB2;A0A024RAB0;A0A024RAB2;A0A024RAF7;P42892	Endothelin-converting enzyme 1	ECE1
27.3487	27.5196	27.48	27.7979	27.5466	27.3282	27.109	27.0558	27.0127	8	20.2	73.361	1445400000	36	A0A024RAB5;J3KPC5;X6R8W7;P47736;F2Z357;A0A0A0MQY8;Q49AP2	A0A024RAB5;J3KPC5;X6R8W7;P47736;F2Z357;A0A0A0MQY8;Q49AP2	Rap1 GTPase-activating protein 1	RAP1GA1;RAP1GAP
NaN	23.5379	22.7825	22.7927	NaN	NaN	NaN	NaN	NaN	2	0.6	464.01	50086000	8	A0A024RAB6;P98160;Q59EG0	A0A024RAB6;P98160;Q59EG0	Basement membrane-specific heparan sulfate proteoglycan core protein;Endorepellin;LG3 peptide	HSPG2
27.9627	27.8449	27.9547	27.8492	27.9567	28.0702	27.9017	28.0185	27.9115	15	17.6	120.3	2133800000	54	A0A024RAC0;Q86V48;E5RFK8;Q05DE3	A0A024RAC0;Q86V48	Leucine zipper protein 1	LUZP1
32.5776	32.714	32.4948	32.6882	32.6203	32.7501	32.694	32.5721	32.7573	26	62.4	49.678	56595000000	200	A5PLK7;A0A024RAC5;Q9P258	A5PLK7;A0A024RAC5;Q9P258	Protein RCC2	RCC2
26.1656	26.3021	26.4326	26.2506	26.4292	26.5013	26.2364	26.2973	26.3885	4	8.2	87.229	707030000	22	A0A024RAC6;Q14241	A0A024RAC6;Q14241	Transcription elongation factor B polypeptide 3	TCEB3
NaN	27.5932	NaN	26.2486	28.3126	NaN	NaN	NaN	NaN	2	28.1	289.7	558050000	5	A0A024RAC9;B3KMT2;B3KM62	A0A024RAC9		ZUBR1
32.5373	32.4879	32.6426	32.6877	32.7844	32.5835	32.3556	32.225	32.5049	16	50.1	48.799	52158000000	129	A0A0C4DGS1;A0A024RAD5;P39656;U3KQ84	A0A0C4DGS1;A0A024RAD5;P39656	Dolichyl-diphosphooligosaccharide--protein glycosyltransferase 48 kDa subunit	DDOST
NaN	NaN	NaN	NaN	NaN	NaN	26.6691	26.9636	26.4627	4	12.7	54.6	514640000	5	A0A024RAD7;Q658P3;B8ZZX6	A0A024RAD7;Q658P3;B8ZZX6	Metalloreductase STEAP3	STEAP3
29.0771	29.3329	29.445	29.4754	29.3266	29.67	29.3297	29.194	29.3336	9	21.8	61.719	5776100000	62	A0A024RAD8;P30038;Q5TF55	A0A024RAD8;P30038	Delta-1-pyrroline-5-carboxylate dehydrogenase, mitochondrial	ALDH4A1
25.3447	25.0067	25.3017	25.0297	25.0568	24.9349	25.2122	25.2206	25.0523	2	53.1	3.8725	309890000	12	T2DL33;A0A172WCC1;A0A024RAE0;E7EQ47;Q6ZSC4;F6XSS0;I7LNF1;Q0KG01;W6S1I0;W6PPJ2;V6EVT1;U5U2J9;U5U1V4;T2DL95;T2DL93;T2DKY0;T2DJN4;S6FLM9;S5VXN0;Q9UK74;Q9UK19;Q9UDZ5;Q9NXY8;Q9HCC3;Q9H248;Q9C0J7;Q99906;Q8IZT1;Q8IZT0;Q7Z594;Q7RU08;Q70HW2;Q6SV91;Q6SV90;Q6SV89;Q6SV88;Q6SV87;Q6KC49;Q6A1H4;Q6A1H2;Q333X4;Q2UVE9;Q2UVE8;Q1KT12;Q0E5G3;Q08GE1;O95489;M5FHF1;L8EB13;L0RH60;L0RH38;K9JHF7;K8FE51;K8ESS1;K8ES76;K4UQ76…	T2DL33;A0A172WCC1;A0A024RAE0;E7EQ47;Q6ZSC4;F6XSS0;I7LNF1;Q0KG01;W6S1I0;W6PPJ2;V6EVT1;U5U2J9;U5U1V4;T2DL95;T2DL93;T2DKY0;T2DJN4;S6FLM9;S5VXN0;Q9UK74;Q9UK19;Q9UDZ5;Q9NXY8;Q9HCC3;Q9H248;Q9C0J7;Q99906;Q8IZT1;Q8IZT0;Q7Z594;Q7RU08;Q70HW2;Q6SV91;Q6SV90;Q6SV89;Q6SV88;Q6SV87;Q6KC49;Q6A1H4;Q6A1H2;Q333X4;Q2UVE9;Q2UVE8;Q1KT12;Q0E5G3;Q08GE1;O95489;M5FHF1;L8EB13;L0RH60;L0RH38;K9JHF7;K8FE51;K8ESS1;K8ES76;K4UQ76…	Blood group Rh(D) polypeptide;Blood group Rh(CE) polypeptide	RHD;RHCE;RhDTI;RhIVb(J);RhCE;RhD
30.9434	30.9699	31.001	30.9028	30.7187	30.6199	30.882	31.32	30.9544	16	54.4	27.56	17321000000	89	A0A024RAE1;Q9UKD2;B4DHZ2	A0A024RAE1;Q9UKD2	mRNA turnover protein 4 homolog	C1orf33;MRTO4
31.2682	30.5264	31.4146	31.0297	30.6551	30.9111	31.2579	31.1287	31.3355	6	58.8	11.15	19207000000	71	B8ZWD1;A0A024RAF2;A0A0A0MTI5;B8ZWD9;P07108;B8ZWD8	B8ZWD1;A0A024RAF2;A0A0A0MTI5;B8ZWD9;P07108;B8ZWD8	Acyl-CoA-binding protein	DBI
26.8305	26.9207	27.0096	26.7604	26.8948	26.9743	26.7025	NaN	26.6875	3	34.7	11.833	955430000	13	B4E364;A0A024RAG3;P11234;C9J6B1;C9JQB3	B4E364;A0A024RAG3;P11234;C9J6B1	Ras-related protein Ral-B	RALB
31.8267	31.7415	31.9487	31.8607	31.9104	31.8755	31.9787	32.123	31.8996	20	40.1	75.406	33970000000	185	A0A024RAH8;Q9NVP1;Q4ZG72;Q8N254;Q59FR7;Q53TI6;H7C452	A0A024RAH8;Q9NVP1;Q4ZG72;Q8N254	ATP-dependent RNA helicase DDX18	DDX18
31.463	31.3846	31.3787	31.5892	31.4971	31.5171	31.3156	31.4146	31.5038	24	68.4	47.371	24698000000	154	A0A024RAI1;P61158;B4DXW1;Q59FV6;B4DTI0;B4DT29;B4E1U3;F8WDR7;F8WEW2;F8WE84	A0A024RAI1;P61158;B4DXW1;Q59FV6;B4DTI0;B4DT29	Actin-related protein 3	ACTR3
29.3408	29.4257	29.627	29.6142	29.4328	29.3934	29.709	29.541	29.4417	11	33.8	47.611	6450200000	52	A0A024RAJ1;Q92552;G5EA06;D6RH20;B4DT94;D6RJC7;Q6PKB3;Q8N6F2;B4DKI9;E5RJ73	A0A024RAJ1;Q92552;G5EA06;D6RH20;B4DT94	28S ribosomal protein S27, mitochondrial	MRPS27
28.6917	26.7598	27.3554	27.3979	NaN	26.9777	28.6327	27.2653	26.8353	5	45.1	16.311	1739000000	20	A0A024RAJ4;O15514;Q53T47;E9PHV4;E9PB93;Q587J0	A0A024RAJ4;O15514;Q53T47;E9PHV4;E9PB93	DNA-directed RNA polymerase II subunit RPB4	POLR2D
28.2002	28.3865	28.3414	28.1745	27.7565	28.3105	28.1448	28.1683	28.2439	8	22.4	68.006	2581500000	26	A0A024RAJ5;Q9Y5P4;A0A0A0MRE4;H0Y9J1	A0A024RAJ5;Q9Y5P4	Collagen type IV alpha-3-binding protein	COL4A3BP
30.2388	30.1728	30.3109	30.275	30.3017	30.3428	30.2318	30.0814	30.2582	14	35.1	63.111	10679000000	77	A0A024RAJ6;P07686;Q5URX0;H0YA83;H0Y9B6;H0Y9M3	A0A024RAJ6;P07686;Q5URX0;H0YA83	Beta-hexosaminidase;Beta-hexosaminidase subunit beta;Beta-hexosaminidase subunit beta chain B;Beta-hexosaminidase subunit beta chain A	HEXB
29.122	29.1383	29.105	29.1921	29.1851	29.254	28.9419	29.1211	29.1386	21	19.6	180.59	4931800000	88	A0A024RAJ8;Q13576;F5H7S7;E7EWC2;B7Z7U6;Q59HA3;B7Z881;E9PDT6;D6R939;B7Z7X2;D6RDK8;D6R999;D6RGC6	A0A024RAJ8;Q13576;F5H7S7;E7EWC2;B7Z7U6;Q59HA3;B7Z881	Ras GTPase-activating-like protein IQGAP2	IQGAP2
26.2353	26.5649	26.3115	26.223	26.2153	26.1392	26.258	26.3641	26.2464	4	7.8	86.6	686560000	18	A0A024RAK1;Q969S9;A0A024RAJ7;D6RF75;D6RAL1	A0A024RAK1;Q969S9;A0A024RAJ7	Ribosome-releasing factor 2, mitochondrial	GFM2
NaN	26.5706	26.3297	26.5056	26.6171	NaN	26.5057	26.4526	26.6324	4	13.9	35.371	716680000	4	A0A024RAP0;A0A024RAL0;A0A024RAQ8;Q13426	A0A024RAP0;A0A024RAL0;A0A024RAQ8;Q13426	DNA repair protein XRCC4	XRCC4
NaN	NaN	NaN	NaN	NaN	NaN	NaN	NaN	22.5153	2	2.3	95.931	45815000	6	Q59GK3;E9PGC0;B4DTX4;A0A024RAL2;P20936;Q7Z4M2;Q05CU5;B4DTL8	Q59GK3;E9PGC0;B4DTX4;A0A024RAL2;P20936;Q7Z4M2;Q05CU5;B4DTL8	Ras GTPase-activating protein 1	RASA1
25.4824	25.596	25.8359	25.9213	25.4969	25.7579	25.9361	25.9095	25.6243	3	2.8	168.85	470280000	15	A0A024RAL3;Q7Z3T8	A0A024RAL3;Q7Z3T8	Zinc finger FYVE domain-containing protein 16	ZFYVE16
NaN	NaN	NaN	NaN	NaN	NaN	NaN	NaN	26.8719	3	18.3	43.129	501480000	5	D6RJG6;A0A0R4J2G5;A0A024RAL6;B2R681;A0A024RAL7;Q06413;D6RJA7;A0A1B0GV32;A0A1B0GTW4;D6RG21;D6RCM6;D6R942;D6RC63;A0A0D9SGF3;D8L7E9;A0A0D9SFD0;A0A0D9SGI5	D6RJG6;A0A0R4J2G5;A0A024RAL6;B2R681;A0A024RAL7;Q06413;D6RJA7;A0A1B0GV32	Myocyte-specific enhancer factor 2C	MEF2C
31.7181	31.5363	31.5583	31.5765	31.3269	31.2702	31.4277	31.527	31.4507	33	48.3	102.35	25429000000	179	A0A024RAM0;Q92973;B4DSC0;E7EW37;S4R398	A0A024RAM0;Q92973	Transportin-1	TNPO1
25.5644	NaN	25.671	NaN	NaN	NaN	25.4287	25.6762	25.7458	2	31.5	10.69	277660000	9	D6RIT0;D6R921;D6R9U7;A0A024RAM1;O15318;D6RJH6	D6RIT0;D6R921;D6R9U7;A0A024RAM1;O15318;D6RJH6	DNA-directed RNA polymerase III subunit RPC7	POLR3G
26.5296	NaN	25.9268	NaN	NaN	NaN	25.6594	25.4437	25.9763	3	23.6	11.776	358960000	4	A0A024RAM2;P35754	A0A024RAM2;P35754	Glutaredoxin-1	GLRX
32.3689	32.3768	32.3348	32.6533	32.5617	32.6491	32.1513	32.066	32.1652	61	39.4	270.62	46785000000	418	A0A024RAM4;P46821;A2BDK6;Q5H9P1;Q05BW8;D6RA32;Q86X89;Q32NB7;Q6PJD3;A5D6X1;Q4VBY4;D6RA40;A5D8X6;D6RCL2;D6RGJ3	A0A024RAM4;P46821;A2BDK6;Q5H9P1	Microtubule-associated protein 1B;MAP1B heavy chain;MAP1 light chain LC1	MAP1B;DKFZp686F1345
NaN	NaN	NaN	NaN	NaN	NaN	NaN	22.6909	NaN	2	5.6	22.31	71429000	2	F6S289;D6RGK0;B3KPU6;A0A024RAM6;Q8WV60	F6S289;D6RGK0;B3KPU6;A0A024RAM6;Q8WV60	Pentatricopeptide repeat-containing protein 2, mitochondrial	PTCD2
NaN	NaN	NaN	NaN	NaN	NaN	NaN	NaN	23.9592	3	4.6	97.461	95418000	5	B2R649;A8KA27;A0A024RAP2;P04035;H0Y8F6;H0Y8K6;B4DSB1	B2R649;A8KA27;A0A024RAP2;P04035	3-hydroxy-3-methylglutaryl coenzyme A reductase;3-hydroxy-3-methylglutaryl-coenzyme A reductase	HMGCR
29.4874	29.4802	29.6896	29.38	29.309	29.5378	29.7896	29.5663	29.66	8	53.5	40.089	6645800000	71	A0A024RAQ1;P16989;A0A024RAV4;Q96GD7;Q59EB5;A0A0D9SEI8	A0A024RAQ1;P16989;A0A024RAV4;Q96GD7	Y-box-binding protein 3	CSDA;YBX3
27.6185	27.0958	27.3995	27.0619	26.7778	27.1002	27.1256	27.1684	27.5345	3	32.5	17.762	1324100000	21	A0A024RAR3;Q8TAC1;D6RBY0	A0A024RAR3;Q8TAC1	Rieske domain-containing protein	LOC317671;RFESD
29.7376	29.7786	29.6503	29.9607	29.9743	29.6877	29.5201	29.4354	29.7475	19	24.5	107.23	7442500000	68	A0A0A7E7X3;A0A0A7E6P4;A0A0A7E6I2;A0A0A7E6D8;A0A0A7E6D4;A0A024RAR8;A8K6H1;A0A0A7E7W5;A0A0A7E7T3;A0A0A7E7S5;A0A0A7E6P9;A0A0A7E6P0;A0A0A7E6K0;A0A0A7E6J5;Q9NZ08;A0A0A7E7W9;A0A075BSP6;A0A075BW43;A0A075BV59;A0A075BTL2;Q53GQ8;H0Y9X5;A0A1S6KJG9;A0A0P0LIR5;D6RAL9	A0A0A7E7X3;A0A0A7E6P4;A0A0A7E6I2;A0A0A7E6D8;A0A0A7E6D4;A0A024RAR8;A8K6H1;A0A0A7E7W5;A0A0A7E7T3;A0A0A7E7S5;A0A0A7E6P9;A0A0A7E6P0;A0A0A7E6K0;A0A0A7E6J5;Q9NZ08;A0A0A7E7W9;A0A075BSP6;A0A075BW43	Endoplasmic reticulum aminopeptidase 1	ERAP1;ARTS-1
28.6327	28.4445	28.3327	28.3823	28.3271	28.3076	28.6075	28.7365	28.5848	11	32.1	50.646	3193400000	57	A0A024RAS3;Q9H0S4;Q53GJ1;Q9H4E3;B4DYP6;A4UCU0;Q7Z4B1;F5H1N9	A0A024RAS3;Q9H0S4;Q53GJ1;Q9H4E3	Probable ATP-dependent RNA helicase DDX47	hCG_27698;DDX47;E4-DBP
28.0116	28.2682	28.3759	28.1232	28.1232	27.9354	27.563	27.6871	27.7893	2	30.7	9.792	2253000000	6	F5H2R5;F5H6Q0;F5H3P3;H0YGX7;B2R4F3;A0A024RAS5;P52566	F5H2R5;F5H6Q0;F5H3P3;H0YGX7;B2R4F3;A0A024RAS5;P52566	Rho GDP-dissociation inhibitor 2	ARHGDIB
31.2906	30.7564	31.2258	31.2328	30.8143	30.9789	31.1874	30.8603	31.1259	12	39.1	42.966	18953000000	81	A0A024RAV0;P54687;F5H2F2;A0A087WYF2	A0A024RAV0;P54687;F5H2F2	Branched-chain-amino-acid aminotransferase;Branched-chain-amino-acid aminotransferase, cytosolic	BCAT1
30.1223	30.0947	30.2113	30.2553	30.147	30.2666	30.1726	30.2134	30.3812	19	42.5	73.457	10359000000	76	A0A024RAV2;P46063;F8WD97;F5H2L2;F8WA66;F5H4P4;F5H3W0;F5GYB7	A0A024RAV2;P46063	ATP-dependent DNA helicase Q1	RECQL
NaN	NaN	24.9901	NaN	24.8696	NaN	NaN	NaN	NaN	2	5	49.971	200600000	3	A0A024RAW6;Q7Z6B0;H0YH48;H0YGB4;F5GWB1;A0A0A0MTP0;A0A0A0MTK0;Q05D28	A0A024RAW6;Q7Z6B0;H0YH48;H0YGB4;F5GWB1;A0A0A0MTP0;A0A0A0MTK0;Q05D28	Coiled-coil domain-containing protein 91	DKFZP779L1558;CCDC91
29.1169	29.1005	29.2137	29.2416	29.1864	29.0255	29.1894	29.0121	29.0401	9	23.9	64.907	4926300000	52	B4DMD3;B4DY34;A0A024RAW9;Q9Y2W2;F5H5G4	B4DMD3;B4DY34;A0A024RAW9;Q9Y2W2	WW domain-binding protein 11	WBP11
NaN	NaN	NaN	NaN	NaN	NaN	NaN	24.9999	NaN	2	24.7	8.8863	252660000	2	F5H7F6;F5H6X2;Q6LET6;A0A024RAX2;P10620	F5H7F6;F5H6X2;Q6LET6;A0A024RAX2;P10620	Microsomal glutathione S-transferase 1	MGST1
NaN	NaN	NaN	NaN	25.1466	NaN	NaN	26.0848	26.0972	4	8.7	95.486	264910000	8	B3KQF8;A0A024RAY1;Q6VMQ6;B3KNI7;B4DRL6;B4E2A2;F5GYR7;A8MV73	B3KQF8;A0A024RAY1;Q6VMQ6;B3KNI7;B4DRL6;B4E2A2	Activating transcription factor 7-interacting protein 1	ATF7IP
34.432	34.6043	34.5614	34.5093	34.5798	34.5933	34.5618	34.5011	34.6391	39	79.5	48.029	212010000000	431	B2RA03;A0A024RAY2;P05783;F8VZY9;I6L965;CON__H-INV:HIT000015463	B2RA03;A0A024RAY2;P05783;F8VZY9;I6L965	Keratin, type I cytoskeletal 18	KRT18
27.5531	27.507	27.7511	27.5329	27.7338	27.5892	27.6726	27.6734	27.7316	12	23	134.32	1752500000	34	A0A024RAY7;Q9HAU0;B4DHK5;A0JP02;B4DMB9;B4DJX4;H0YGJ6;F5H1X3;H0YG48	A0A024RAY7;Q9HAU0;B4DHK5;A0JP02;B4DMB9;B4DJX4	Pleckstrin homology domain-containing family A member 5	PLEKHA5
26.5496	26.4443	27.045	27.2603	27.3011	27.3412	26.6595	26.6223	26.6381	8	20.9	61.474	1052900000	36	B4DG60;A0A024RAZ1;Q9P1Z2;B3KS47;B4DKB9;F8VWP8;F8VPN1;F8VUB3;F8VZI3;F8W0X2;F8VRQ9;F8VXS2;F8VQE3	B4DG60;A0A024RAZ1;Q9P1Z2;B3KS47;B4DKB9	Calcium-binding and coiled-coil domain-containing protein 1	CALCOCO1
35.2317	35.257	35.2716	35.306	35.3185	35.3448	35.2777	35.4369	35.4243	21	53.8	38.746	358960000000	341	A0A024RAZ7;P09651;F8W6I7;Q0VAC0;A0A024RB53;Q9BSM5;Q6IPF2;F8VZ49;A0A024RC46;A0A024QZ98;Q32P51;B4E0B5;H0YH80;F8VTQ5;F8VYN5;B4DP35;F8W646;Q3MI39	A0A024RAZ7;P09651;F8W6I7;Q0VAC0;A0A024RB53;Q9BSM5;Q6IPF2;F8VZ49;A0A024RC46;A0A024QZ98;Q32P51;B4E0B5;H0YH80	Heterogeneous nuclear ribonucleoprotein A1;Heterogeneous nuclear ribonucleoprotein A1, N-terminally processed;Heterogeneous nuclear ribonucleoprotein A1-like 2	HNRPA1;HNRNPA1;hCG_2020860;RP11-78J21.1;HNRNPA1L2
27.3592	27.4325	27.3053	27.4187	28.1274	27.9273	27.4292	27.0221	27.3761	9	10	114.48	1602700000	24	B2R627;A8K6A5;A0A024RB01;P08648;H0YIV7	B2R627;A8K6A5;A0A024RB01;P08648	Integrin alpha-5;Integrin alpha-5 heavy chain;Integrin alpha-5 light chain	ITGA5
27.2483	27.4296	27.1777	27.7468	NaN	27.2298	26.7411	27.0328	27.1272	2	13.5	14.265	1240900000	9	F8VNT9;F8VV56;F8W022;F8VWK8;W6A4U0;A0A024RB05;P08962	F8VNT9;F8VV56;F8W022;F8VWK8;W6A4U0;A0A024RB05;P08962	Tetraspanin;CD63 antigen	CD63
NaN	NaN	NaN	24.7768	NaN	NaN	NaN	NaN	NaN	3	9	42.548	140490000	6	A0A024RB08;A0A087WU02;Q9HC06;Q96RQ1;H0YI50;F8VPA6;Q86TD3;H0YI58;F8W0R1;F8VR88;F8VUZ2	A0A024RB08;A0A087WU02;Q9HC06;Q96RQ1;H0YI50;F8VPA6	Endoplasmic reticulum-Golgi intermediate compartment protein 2	ERGIC2
NaN	NaN	NaN	NaN	NaN	26.979	NaN	NaN	NaN	2	32.1	23.707	772590000	8	A0A024RB09;P61020;Q6FI54	A0A024RB09;P61020;Q6FI54	Ras-related protein Rab-5B	RAB5B
30.8815	30.3784	28.6925	29.4396	29.9724	29.514	29.6388	29.5325	29.1915	6	35.7	13.015	8255600000	42	A0A024RB14;P62854;Q75MH1;Q5JNZ5;Q76N57;Q76N56	A0A024RB14;P62854;Q75MH1;Q5JNZ5	40S ribosomal protein S26;Putative 40S ribosomal protein S26-like 1	RPS26;RPS26P11
32.6662	32.552	32.6706	32.9997	32.92	32.926	32.5486	32.4713	32.641	37	39.4	122.85	59154000000	272	A0A024RB17;A0A024RB16;Q9BSJ8;B3KMV5;B3KY56;F8VZB1	A0A024RB17;A0A024RB16;Q9BSJ8;B3KMV5;B3KY56	Extended synaptotagmin-1	FAM62A;ESYT1
30.2979	30.4784	30.4806	30.5154	30.6171	30.6852	30.3983	30.324	30.5285	16	27.4	132.88	12556000000	147	A0A024RB22;Q8TAQ2;F8VZW6;Q658P9	A0A024RB22;Q8TAQ2	SWI/SNF complex subunit SMARCC2	SMARCC2
27.3075	28.1061	28.0918	27.9725	28.2958	27.966	27.8709	27.9488	28.2946	5	32	22.745	2254100000	14	A0A024RB27;Q504R6;P51153;A0A087WWB9;D3DV69	A0A024RB27;Q504R6;P51153;A0A087WWB9;D3DV69	Ras-related protein Rab-13	hCG_24991;RAB13;hCG_1996054
NaN	NaN	NaN	NaN	NaN	25.7436	NaN	NaN	NaN	2	27.4	22.764	267210000	2	A0A024RB31;B4E368;P14649;F8W1I5	A0A024RB31;B4E368;P14649;F8W1I5	Myosin light chain 6B	MYL6B
32.3644	32.6698	32.5836	32.562	32.3557	32.7464	32.7383	32.7657	32.8213	8	35	18.697	55749000000	69	A0A024RB32;A0A087WYT3;B3KUY2;Q15185;B4DDC6	A0A024RB32;A0A087WYT3;B3KUY2;Q15185	Prostaglandin E synthase 3	PTGES3
33.3785	33.3111	33.486	33.4638	33.2386	33.3492	33.5971	33.6284	33.4335	8	61	15.016	97802000000	99	F8VZJ2;H0YHX9;A0A024RB41;Q13765;E9PAV3;F8W0W4;B4DDI8;F8W1N5;F8VNW4;F8VZ58;A8K6N6;Q9BZK3	F8VZJ2;H0YHX9;A0A024RB41;Q13765;E9PAV3;F8W0W4;B4DDI8;F8W1N5;F8VNW4	Nascent polypeptide-associated complex subunit alpha;Nascent polypeptide-associated complex subunit alpha, muscle-specific form	NACA;hCG_2016482
29.7509	29.4081	29.591	29.7418	29.4118	29.7089	29.803	30.1205	30.0064	8	70.1	19.266	7555100000	51	A0A024RB57;G3V1V4;Q8WW33	A0A024RB57;G3V1V4;Q8WW33	Gametocyte-specific factor 1	FAM112B;GTSF1
27.2156	27.3644	27.4556	27.4257	26.9958	27.314	27.2098	27.1035	27.0745	6	28.2	34.092	1346600000	23	A0A024RB62;Q9UBP6;H0YIH0;H0YHU4	A0A024RB62;Q9UBP6;H0YIH0	tRNA (guanine-N(7)-)-methyltransferase	METTL1
31.1667	31.0095	31.2787	31.1199	31.2346	31.3361	31.389	31.4589	31.0737	3	43.7	13.393	21293000000	39	F8W651;Q53FU3;A0A024RB72;F8VVA7;P61923;F8VXB1;F8VUC5;F8W156;F8VYZ4;F8VYK5;F8VXR1	F8W651;Q53FU3;A0A024RB72;F8VVA7;P61923;F8VXB1;F8VUC5;F8W156;F8VYZ4	Coatomer subunit zeta-1	COPZ1
32.5143	32.5115	32.5278	32.5683	32.5968	32.4489	32.5499	32.6476	32.4578	15	39.5	50.431	52184000000	90	B4DJV2;A0A024RB75;O75390;B3KTN4;A0A0C4DGI3;Q0QEL2;H0YIC4;B7Z1E1;H0YH82;F8VRP1;F8VX68;F8VPF9;F8VPA1;F8VTT8;F8W1S4;F8W4S1;F8VR34;F8W642;F8VZK9;F8VX07;F8VRI6;F8VU34;F8W0J2;F8VWQ5	B4DJV2;A0A024RB75;O75390;B3KTN4;A0A0C4DGI3	Citrate synthase;Citrate synthase, mitochondrial	CS
28.5777	28.2113	28.2425	28.1823	28.3082	28.1637	27.9292	28.158	27.9863	4	29.5	15.225	2598100000	27	A0A024RB76;Q9BRT6	A0A024RB76;Q9BRT6	Protein LLP homolog	C12orf31;LLPH
30.3893	30.6155	30.4319	30.4641	30.3221	30.5345	30.8296	30.7968	30.6249	11	46.6	33.929	13433000000	67	A0A024RB77;G3V5T9;P24941;A0A024RB10;E7ESI2;B4DDL9	A0A024RB77;G3V5T9;P24941;A0A024RB10;E7ESI2	Cyclin-dependent kinase 2	CDK2
34.2808	34.4029	34.2756	34.2902	34.4293	34.5975	34.6302	34.6338	34.6112	28	71.4	40.911	199400000000	248	A8K6Y1;Q6PIN5;A0A024RB85;Q9UQ80;Q05D08;F8VR77;F8W0A3;H0YIN7;F8VZ69	A8K6Y1;Q6PIN5;A0A024RB85;Q9UQ80;Q05D08;F8VR77	Proliferation-associated protein 2G4	PA2G4
30.6963	30.1776	30.3592	30.2164	29.9548	30.1246	29.8174	29.65	30.2156	7	36.4	20.825	10048000000	47	A0A024RB87;P61224;F5H823;B7ZB78;F5GZG1;A0A0J9YXB3;A6NIZ1;E7ESV4;F5H7Y6;F5GX62;B7ZAY2;Q9BXV4;F5H6R7;F5H004;F8WBC0;F5H4H0;F5GYH7;F5H077;F5GWU8;F5H491;F5H0B7;F5H500;F5GYB5	A0A024RB87;P61224;F5H823;B7ZB78;F5GZG1;A0A0J9YXB3;A6NIZ1;E7ESV4;F5H7Y6;F5GX62;B7ZAY2;Q9BXV4	Ras-related protein Rap-1b;Ras-related protein Rap-1b-like protein	RAP1B
33.8782	33.6969	33.8988	34.271	34.0436	34.2067	33.6637	33.5763	33.7058	28	63.6	53.464	133680000000	223	Q5HYG8;A0A024RB99;V9HW06;Q53ET4;P34897;Q5BJF5;B4DJQ3;B4DP88;B4E1G2;B4DWA7;B4DJ63;B4DW25;B4DLV4;H0YIZ0;G3V2Y4;G3V5L0;G3V4W5;G3V540;G3V2W0;G3V241;G3V3Y8;G3V4T0;G3V4X0;G3V2E4;G3V2D2	Q5HYG8;A0A024RB99;V9HW06;Q53ET4;P34897;Q5BJF5;B4DJQ3;B4DP88;B4E1G2;B4DWA7;B4DJ63;B4DW25;B4DLV4;H0YIZ0;G3V2Y4	Serine hydroxymethyltransferase;Serine hydroxymethyltransferase, mitochondrial	DKFZp686P09201;SHMT2;HEL-S-51e
29.0889	28.7706	29.1025	29.0492	28.8699	29.0684	29.0914	28.8893	29.0302	9	38.2	24.347	4513200000	73	A0A024RBA9;Q9UL25;Q96GX3	A0A024RBA9;Q9UL25;Q96GX3	Ras-related protein Rab-21	RAB21
27.629	27.4076	27.2891	27.8893	27.35	27.6378	27.4551	27.7314	27.5292	7	32.3	33.729	1657100000	20	A0A024RBB6;P11802;F8VYH9;F8VTV8;F8VWX7;F8VZZ0;F8VZ51;Q6LC83;F8VXD2;F8W1L8;Q96BE9;F8VYY1	A0A024RBB6;P11802;F8VYH9;F8VTV8;F8VWX7;F8VZZ0;F8VZ51;Q6LC83;F8VXD2	Cyclin-dependent kinase 4	CDK4
33.6662	33.5329	33.5607	33.4683	33.3351	33.347	33.3953	33.6322	33.5125	15	79.5	31.02	101570000000	166	F8VY35;F5H4R6;A0A024RBB7;P55209;F8VUX1;F8W0J6;B7Z2V4;H0YIV4;F8W020;F8VXI6;B7Z5H0;H0YH88;H0YHC3;F8VVB5;B7Z4K9	F8VY35;F5H4R6;A0A024RBB7;P55209;F8VUX1;F8W0J6;B7Z2V4;H0YIV4;F8W020;F8VXI6;B7Z5H0;H0YH88;H0YHC3	Nucleosome assembly protein 1-like 1	NAP1L1
29.1385	29.1719	29.0998	29.1325	28.9345	29.1287	29.1988	29.2785	29.1792	12	16.9	101.19	4971400000	54	A0A024RBB8;Q5HYM3;Q9BZF1;F8VQX7;Q641R2;F8VUA7;Q96N80;Q96E43;Q8WVV2;B3KP32;B4DMI4;B4E033;F8W060;F8VZB8;F8VVD3;F8VVE7;F8VZ43	A0A024RBB8;Q5HYM3;Q9BZF1;F8VQX7;Q641R2;F8VUA7	Oxysterol-binding protein;Oxysterol-binding protein-related protein 8	OSBPL8;DKFZp686C0249
27.7331	28.1392	28.0977	27.8973	28.0199	28.1974	28.0643	28.3067	28.2915	13	22	99.996	2406500000	59	A0A024RBB9;Q9Y2U8;B4DI45;B4E2K7	A0A024RBB9;Q9Y2U8	Inner nuclear membrane protein Man1	LEMD3
29.0058	28.8307	28.7276	29	28.933	29.0903	28.666	28.5516	28.7335	9	25.2	53.42	4038300000	32	B4DTT0;Q7Z3X3;H7C3P4;A8K6V6;A0A024RBC5;F6S8M0;B4E284;P15586;F5H4C6;H0YFA9;A0A0S2Z3S2	B4DTT0;Q7Z3X3;H7C3P4;A8K6V6;A0A024RBC5;F6S8M0;B4E284;P15586;F5H4C6	N-acetylglucosamine-6-sulfatase	DKFZp686E12166;GNS
27.3804	27.2588	27.1532	27.4392	27.2644	27.5412	27.2055	27.7626	27.4517	6	11	134.68	1479800000	26	A0A024RBC7;P20020;E7ERY9;Q59H63;Q58F24;F8W1V5	A0A024RBC7;P20020;E7ERY9;Q59H63	Calcium-transporting ATPase;Plasma membrane calcium-transporting ATPase 1	ATP2B1
25.646	30.3193	28.0609	29.0161	30.9751	27.0088	26.9167	27.1636	26.7257	5	27.8	20.306	4436300000	35	A0A024RBD0;Q9NZJ9;F8VRL4;F8VRR0;A0A0C4DGJ4;Q96G61;Q8NFP7	A0A024RBD0;Q9NZJ9;F8VRL4;F8VRR0;A0A0C4DGJ4	Diphosphoinositol polyphosphate phosphohydrolase 2	NUDT4
26.748	26.7238	26.5989	27.2535	27.0207	27.0366	26.394	27.0039	26.7098	5	39.9	22.172	1016400000	20	A0A024RBD2;O14508;F8VU91;F8VRV3;B5BU82;B4DMW5;F8VS53;S4R3W1	A0A024RBD2;O14508;F8VU91;F8VRV3;B5BU82;B4DMW5	Suppressor of cytokine signaling 2	SOCS2
28.0513	27.9916	27.866	27.9379	27.7257	27.7579	27.5603	27.7723	27.6958	7	28.1	58.62	1984400000	20	F8VV52;B3KTL6;B2RDX7;A0A024RBD8;Q9NZN8;F8VP97;F8VUB4;F8VQD8;F8VVY1;F8VX63;F8VQF4;A0A087X050;F8VRS8;F8W145;H0YHT8;F8VVD4;F8VRJ3;F8VWH8;H0YI80;H0YI11;H0YH84	F8VV52;B3KTL6;B2RDX7;A0A024RBD8;Q9NZN8;F8VP97;F8VUB4	CCR4-NOT transcription complex subunit 2	CNOT2
NaN	24.7383	NaN	24.7801	24.7697	NaN	NaN	NaN	NaN	3	9.8	57.505	110250000	10	Q05CT8;A8K1Z3;A0A024RBE5;Q8NHV4;G3V2M9;G3V4L2;G3V2V3	Q05CT8;A8K1Z3;A0A024RBE5;Q8NHV4	Protein NEDD1	NEDD1
31.8389	31.7279	31.73	31.6297	31.6471	31.9453	31.8344	31.7407	31.7781	9	46.9	50.67	30579000000	147	A0A024RBE7;P42167;G5E972;A0A024RBH7;Q59G12;H0YJH7;Q9P1N8	A0A024RBE7;P42167;G5E972;A0A024RBH7;Q59G12;H0YJH7	Lamina-associated polypeptide 2, isoforms beta/gamma;Thymopoietin;Thymopentin	TMPO
32.3302	32.4968	32.4391	32.5863	32.703	32.9158	32.5474	32.6661	32.7584	11	36.7	36.161	54794000000	100	F8VVM2;Q8NCF7;Q53HC3;B2RE88;A0A024RBE8;A0A024RBH9;Q00325;F8VWQ0;F8VZL5;F8VWR4	F8VVM2;Q8NCF7;Q53HC3;B2RE88;A0A024RBE8;A0A024RBH9;Q00325	Phosphate carrier protein, mitochondrial	SLC25A3
NaN	27.1855	NaN	27.4857	NaN	NaN	27.5528	NaN	NaN	3	45.3	14.882	1289500000	11	S4R360;J3KPP0;A0A024RBG3;S4R2Z7;Q9Y6G3	S4R360;J3KPP0;A0A024RBG3;S4R2Z7;Q9Y6G3	39S ribosomal protein L42, mitochondrial	MRPL42
30.0482	30.2229	29.9855	29.7164	30.0057	29.9799	30.0477	30.1615	30.1153	10	26.7	55.878	9230600000	72	Q9BV37;Q53FW9;A0A024RBH5;Q13610;B4DNL1;B4DJV5;Q86X79;Q05BL3;Q6PKI5;Q6PIN4;F8VZ56	Q9BV37;Q53FW9;A0A024RBH5;Q13610;B4DNL1;B4DJV5	Periodic tryptophan protein 1 homolog	PWP1
32.0835	32.2173	32.3985	32.2777	32.2695	32.4633	32.3027	32.2074	32.2718	16	39.7	53.248	43643000000	136	A0A024RBI5;Q59EA2;Q9ULV4;Q53G58;B3KN06;B4E3S0;B7Z9V0;B4DMH3;H0YHL7;F8W1H8;F8VUX3;F8VSA4;F8VRE9;F8VTT6;F8VVB7;F8VV53;B3KRY9;B3KSZ9;J3QLV6;J3KSS5;Q6QEF8	A0A024RBI5;Q59EA2;Q9ULV4;Q53G58;B3KN06;B4E3S0;B7Z9V0;B4DMH3	Coronin;Coronin-1C	CORO1C
29.4606	29.65	29.5649	29.5086	29.6726	29.8169	29.7745	29.9503	30.1035	16	37.6	56.313	7514900000	72	B3KMP2;A8KAQ7;A0A024RBJ3;Q9UJX3;A5D8X2;Q2M2R1;Q4KMX6;H0YIW2;H0YIX7	B3KMP2;A8KAQ7;A0A024RBJ3;Q9UJX3;A5D8X2;Q2M2R1;Q4KMX6	Anaphase-promoting complex subunit 7	ANAPC7
32.7488	32.3257	32.0509	32.0412	31.6281	31.9735	31.9128	31.8601	31.585	10	30.2	32.741	37432000000	46	Q8TBK5;Q8N5Z7;B2R4K7;A0A024RBK3;Q02878;B4DRX3;Q9HBB3;U3KQR5;F8VR69;F8VZ45;F8VZA3;F8VWR1;F8VU16	Q8TBK5;Q8N5Z7;B2R4K7;A0A024RBK3;Q02878;B4DRX3;Q9HBB3;U3KQR5;F8VR69;F8VZ45	60S ribosomal protein L6	RPL6
27.2244	27.6317	27.2938	26.9677	27.1903	27.4377	27.5853	27.8185	27.7324	4	15.5	64.84	1540500000	18	A0A024RBK4;O14545;F8VNX8;F8VWK2;F8VVF3	A0A024RBK4;O14545;F8VNX8	TRAF-type zinc finger domain-containing protein 1	TRAFD1
30.685	30.8723	30.6477	31.2173	31.2297	31.2643	30.8556	30.7821	30.7503	20	52.3	53.166	17166000000	104	E9PIR7;B2R5P6;F8W809;B7Z2S5;A0A087WSW9;A0A182DWI3;Q6ZR44;A0A024RBK9;A0A140VKC9;A0A087WSY9;Q16881;E2QRB9;E9PKD3;A0A0B4J225;E9PIZ5;E9PLT3;E9PKI4;E9PRI8;E9PQI3;E9PJU2	E9PIR7;B2R5P6;F8W809;B7Z2S5;A0A087WSW9;A0A182DWI3;Q6ZR44;A0A024RBK9;A0A140VKC9;A0A087WSY9;Q16881;E2QRB9;E9PKD3	Thioredoxin reductase 1, cytoplasmic	TXNRD1
26.7268	26.6551	27.0811	27.193	26.9417	27.3227	27.0277	26.7103	27.2214	4	14	34.674	1121200000	26	A0A024RBL2;Q96GA7;F8VYZ3;H0YIA2;H0YID3	A0A024RBL2;Q96GA7;F8VYZ3	Serine dehydratase-like	SDSL
28.8982	28.9628	28.9146	28.9664	28.8841	28.9647	29.0206	28.6988	28.8711	9	46.7	30.348	4241300000	36	B2R6A0;A0A024RBN1;Q9Y478;B4DVP2;F5H2X8;X5D2S2;O43741;F5H4Y8;F5H610	B2R6A0;A0A024RBN1;Q9Y478;B4DVP2	5-AMP-activated protein kinase subunit beta-1	PRKAB1
30.0385	29.9394	30.2006	29.8947	30.0506	30.2071	30.1015	30.1826	30.2663	2	54.7	9.7499	9666000000	23	Q9UEG9;H6SG15;A0A024RBN6;P12074;O95101	Q9UEG9;H6SG15;A0A024RBN6;P12074;O95101	Cytochrome c oxidase subunit 6A, mitochondrial;Cytochrome c oxidase subunit 6A1, mitochondrial	COX6A1
NaN	NaN	NaN	NaN	NaN	NaN	NaN	25.1878	NaN	3	3.7	89.896	151830000	2	B3KSN5;B2RDI7;A0A024RBP0;B3KWY9;Q8N5U6;H0YFN9;B3KUR9;B4DWN2;F5H510;H0YF69;H0YG28	B3KSN5;B2RDI7;A0A024RBP0;B3KWY9;Q8N5U6;H0YFN9;B3KUR9;B4DWN2	RING finger protein 10	RNF10
NaN	27.6888	28.0834	NaN	NaN	NaN	NaN	28.2984	28.6095	2	72.1	33.773	2581800000	11	Q9UPN1;F8VYE8;A0A024RBP2;P36873;F8W0W8;F8VR82;A0A087WYY5	Q9UPN1;F8VYE8;A0A024RBP2;P36873;F8W0W8;F8VR82	Serine/threonine-protein phosphatase;Serine/threonine-protein phosphatase PP1-gamma catalytic subunit	PPP1CC
28.9011	28.9933	29.0901	29.3355	29.1426	29.6574	29.184	29.0787	29.1043	21	20	160.99	5081400000	75	A0A024RBR1;P30622;J3KP58;Q59GJ4;F5H0N7;F5H6A0;Q6P5Z9;B3KXA5;F6VGP8;Q86WU4	A0A024RBR1;P30622;J3KP58;Q59GJ4;F5H0N7;F5H6A0	CAP-Gly domain-containing linker protein 1	RSN;CLIP1
26.3107	NaN	26.2605	26.2895	26.773	26.9192	26.7594	26.7255	26.6893	2	21.7	22.092	806960000	18	A0A024RBR3;O43583;F8VVL1	A0A024RBR3;O43583;F8VVL1	Density-regulated protein	DENR
25.7721	25.5068	25.6392	25.7387	NaN	25.1215	25.2925	25.4828	25.8018	3	10	46.089	404920000	12	B4DVE4;F5H5U2;A0A024RBS0;Q8NHQ9;Q8TEC9;E7EX41	B4DVE4;F5H5U2;A0A024RBS0;Q8NHQ9;Q8TEC9	ATP-dependent RNA helicase DDX55	DDX55
33.9419	33.9242	33.901	33.8436	33.8317	33.7425	33.9397	33.9638	33.8998	17	61.8	34.301	135610000000	167	Q53HW2;A8K4Z4;A0A024RBS2;P05388;Q53HK9;F8VWS0;F8VW21;F8VU65;Q6NSF2;B4E3D5;F8VPE8;F8VZS0;G3V210;F8VQY6;F8VRK7;Q8NHW5;F8VWV4;F8VS58;F8W1K8;Q3MHV2	Q53HW2;A8K4Z4;A0A024RBS2;P05388;Q53HK9;F8VWS0;F8VW21;F8VU65;Q6NSF2;B4E3D5;F8VPE8;F8VZS0;G3V210;F8VQY6;F8VRK7;Q8NHW5	60S acidic ribosomal protein P0;60S acidic ribosomal protein P0-like	RPLP0;RPLP0P6
26.6532	26.5364	26.3223	26.3057	26.4604	26.5573	26.28	26.5027	26.3751	9	5.5	268.04	763220000	17	C9JE98;A0A024RBU9;C9J0Q5;C9JFD3;A0A024RBS3;Q9Y618;C9J7T7;C9JQE8;H7C0P3;Q9BT61;H7C1J7;C9J330	C9JE98;A0A024RBU9;C9J0Q5;C9JFD3;A0A024RBS3;Q9Y618;C9J7T7;C9JQE8	Nuclear receptor corepressor 2	NCOR2
NaN	25.8293	24.752	25.4885	NaN	24.6488	NaN	NaN	NaN	3	7.3	53.847	265090000	10	B7ZKQ9;A0A024RBS4;F5H4X0;B3KW46;B4DZ71;A0A0S2Z3N2;B4E3I1;Q59FM4;Q8WTV0;F5H5E8;A0A0S2Z3I2	B7ZKQ9;A0A024RBS4;F5H4X0;B3KW46;B4DZ71;A0A0S2Z3N2;B4E3I1;Q59FM4;Q8WTV0	Scavenger receptor class B member 1	SCARB1
NaN	NaN	NaN	NaN	NaN	NaN	NaN	NaN	24.3001	2	11.9	25.425	225120000	7	Q9H7A6;A0A024RBV2;Q86V21;Q49AJ4	Q9H7A6;A0A024RBV2;Q86V21;Q49AJ4	Acetoacetyl-CoA synthetase	AACS
27.3711	27.2547	27.4812	27.3265	27.3937	27.4136	27.2157	27.2789	27.2895	4	22.4	58.119	1410000000	38	Q59F53;A0A024RBV9;O60907;A0A024R189;Q9BQ87;B4DP68;A0A0D9SFI2	Q59F53;A0A024RBV9;O60907	F-box-like/WD repeat-containing protein TBL1X	TBL1X
27.1593	27.0528	27.4067	27.5424	26.9442	27.4297	27.1077	26.8775	27.1778	6	22.4	32.113	1292200000	37	A0A024RBX6;O00625	A0A024RBX6;O00625	Pirin	PIR
30.0371	29.9713	30.1006	30.1369	30.1241	30.2344	29.9991	29.9496	30.095	15	40.8	43.295	9454900000	77	A0A024RBX9;P08559;A5YPB6;Q53GE3;A5PHJ9;Q9UNV7;Q99725;Q6LCA3;P78557;Q5JPU3;Q5JPU0;Q5JPT9;Q5JPU1;Q99724;P29803	A0A024RBX9;P08559;A5YPB6;Q53GE3;A5PHJ9	Pyruvate dehydrogenase E1 component subunit alpha;Pyruvate dehydrogenase E1 component subunit alpha, somatic form, mitochondrial	PDHA1;PDHA1/LOC79064
28.929	28.7856	28.9339	28.9494	29.0625	28.7979	28.984	29.1256	29.0666	8	48.5	30.529	4362500000	33	Q68D50;A0A024RBY9;P53701	Q68D50;A0A024RBY9;P53701	Cytochrome c-type heme lyase	DKFZp779I1858;HCCS
27.8879	28.13	27.8271	27.6782	28.0121	28.4087	28.3348	28.3135	28.3063	10	22.7	65.677	2443700000	38	A0A024RC00;Q9NRF8;Q9H6Q0	A0A024RC00;Q9NRF8	CTP synthase;CTP synthase 2	CTPS2
NaN	NaN	NaN	NaN	NaN	NaN	NaN	NaN	23.4846	2	5.1	69.904	122190000	5	A8K6P5;A0A024RC06;Q13496;B7Z499	A8K6P5;A0A024RC06;Q13496;B7Z499	Myotubularin	MTM1
27.7933	27.793	27.9347	27.8315	27.9625	28.1426	27.7206	27.7781	28.0017	13	13	161.07	2077500000	41	A0A024RC31;Q9Y2L5;J3QQJ5;Q6PCC9;J3QSA1;J3KSL8;A8K922;J3QQS5;J3QR00	A0A024RC31;Q9Y2L5;J3QQJ5;Q6PCC9;J3QSA1;J3KSL8;A8K922	Trafficking protein particle complex subunit 8	KIAA1012;TRAPPC8
30.5614	30.7252	30.7217	30.5699	30.4707	30.569	30.525	30.6117	30.6158	8	46.8	37.031	13562000000	80	A0A024RC33;Q15555;K7EL66;K7ERD8;M0QX52	A0A024RC33;Q15555;K7EL66;K7ERD8	Microtubule-associated protein RP/EB family member 2	MAPRE2
26.6082	26.6914	26.8097	27.0023	26.9861	27.1289	26.3778	26.7112	26.8675	4	26.6	32.916	983320000	18	A0A0C4DGQ6;A0A024RC37;Q96P16;K7EQR8;K7EP82	A0A0C4DGQ6;A0A024RC37;Q96P16;K7EQR8	Regulation of nuclear pre-mRNA domain-containing protein 1A	RPRD1A;P15RS
27.3672	NaN	27.556	26.9139	NaN	NaN	26.7723	27.0478	27.6062	2	44.8	6.3371	983970000	6	J3KRP6;J3QS72;X6R3J2;J3QQM2;J3KT74;J3QQW2;Q4VAX0;Q4VAX2;A8K0E5;A0A024RC40;A4PIW0;A4PIV8;A4PIV9;A4PIV7;Q15532;J3QSB3;F5GWN1;J3QSG1;J3QQW6;J3QLJ7;J3QQX5;J3KT22;Q6FGL9;B4DLD3;Q8TDQ9	J3KRP6;J3QS72;X6R3J2;J3QQM2;J3KT74;J3QQW2;Q4VAX0;Q4VAX2;A8K0E5;A0A024RC40;A4PIW0;A4PIV8;A4PIV9;A4PIV7;Q15532;J3QSB3;F5GWN1;J3QSG1;J3QQW6;J3QLJ7;J3QQX5;J3KT22;Q6FGL9;B4DLD3;Q8TDQ9	Protein SSXT	SS18;SYT-SSX2;SYT-SSX1;SYT
27.5984	27.3768	27.3593	27.5118	27.3376	27.277	27.403	27.273	27.3511	3	8.2	42.128	1466800000	20	A0A024RC47;P17028	A0A024RC47;P17028	Zinc finger protein 24	ZNF24
25.2169	NaN	NaN	NaN	NaN	NaN	24.9903	25.0506	NaN	4	11.4	64.262	306200000	8	A8KAJ7;A0A024RC48;Q10472;Q05BM8;Q68VJ7;K7EJV8;A0A1L4BJB0;A0A1L4BJC0;A0A1L4BJA6;B3KY85;Q8IUC8	A8KAJ7;A0A024RC48;Q10472;Q05BM8;Q68VJ7;K7EJV8	Polypeptide N-acetylgalactosaminyltransferase;Polypeptide N-acetylgalactosaminyltransferase 1;Polypeptide N-acetylgalactosaminyltransferase 1 soluble form	GALNT1
28.0843	28.1752	28.3082	28.8766	28.7175	28.7984	27.8963	27.7948	28.0861	8	34.3	37.504	2843200000	37	X6R3G6;A0A024RC59;F5GZN3;B4E396;B3KTQ2;A0A024RC55;Q08431;H0YKS8;A0A087WUV5	X6R3G6;A0A024RC59;F5GZN3;B4E396;B3KTQ2;A0A024RC55;Q08431;H0YKS8	Lactadherin;Lactadherin short form;Medin	MFGE8
33.0517	32.962	32.9273	32.8846	32.781	32.8349	32.7449	32.7199	32.7664	59	47.3	189.28	65492000000	367	A4QPB0;A0A024RC65;P46940;A0A0J9YXZ5;H0YLE8;B4E2M0;Q6P1N4;Q5FWG8;Q05DN7;B4DNP4;Q96PA3;H0YKA5;A0A087WWP1;A0A087X225	A4QPB0;A0A024RC65;P46940;A0A0J9YXZ5;H0YLE8;B4E2M0;Q6P1N4	Ras GTPase-activating-like protein IQGAP1	IQGAP1;hCG_1991735
28.1029	28.3436	28.5947	28.3361	28.5664	28.5411	29.1494	28.7549	28.8642	13	28.1	71.664	3504300000	36	A0A024RC67;O43663;H0YL53;G3V3N7;H0YM42;H0YLA0;B4E238	A0A024RC67;O43663;H0YL53	Protein regulator of cytokinesis 1	PRC1
24.4581	NaN	NaN	NaN	NaN	NaN	NaN	NaN	NaN	3	7.1	86.677	102900000	1	A0A024RC70;P09958	A0A024RC70;P09958	Furin	FURIN
25.2285	25.9391	NaN	NaN	26.0313	25.0042	NaN	24.4717	25.1298	3	11.8	39.906	302260000	13	G3V2I3;A0A024RC72;A6NED2	G3V2I3;A0A024RC72;A6NED2	RCC1 domain-containing protein 1	RCCD1
29.0383	29.039	28.9399	28.9063	28.9748	29.289	28.082	29.22	28.8095	2	9.3	14.892	4357200000	12	H0YKT4;H0YNG3;Q6IAM7;A0A024RC78;P67812	H0YKT4;H0YNG3;Q6IAM7;A0A024RC78;P67812	Signal peptidase complex catalytic subunit SEC11;Signal peptidase complex catalytic subunit SEC11A	SEC11A;SPC18;SEC11L1
32.1522	32.0269	32.0533	31.9752	31.8914	32.0819	32.1021	32.0145	32.1431	20	66.2	49.416	37312000000	145	A0A024RC87;A0A140VJT8;P13489;E9PIM9;E9PMJ3;E9PLZ3;E9PIK5;H0YCR7;E9PMN0;E9PMA9;E9PR82;E9PMI1	A0A024RC87;A0A140VJT8;P13489;E9PIM9;E9PMJ3;E9PLZ3	Ribonuclease inhibitor	RNH1
NaN	27.1857	NaN	26.932	NaN	26.7874	NaN	NaN	NaN	2	6.4	56.252	926540000	10	A0A024RC97;Q9BVG9;E9PS47;E9PLE4;A0A0J9YWQ2	A0A024RC97;Q9BVG9;E9PS47;E9PLE4;A0A0J9YWQ2	Phosphatidylserine synthase 2	PTDSS2
27.2139	NaN	26.5809	26.6625	26.5658	26.2742	26.4261	26.7011	26.5148	3	3.8	178.22	868740000	9	E9PJ24;B7ZM65;F8WEF5;B7ZM66;A0A0J9YYB5;A0A0J9YWD5;A0A024RCA1;Q9P1Y6;A0A0J9YX88;A1L197	E9PJ24;B7ZM65;F8WEF5;B7ZM66;A0A0J9YYB5;A0A0J9YWD5;A0A024RCA1;Q9P1Y6;A0A0J9YX88	PHD and RING finger domain-containing protein 1	PHRF1;KIAA1542
34.4192	34.5664	34.614	34.3813	34.4321	34.4751	34.4792	34.7529	34.5669	8	75.7	11.665	208810000000	149	A0A024RCA7;P05387;H0YDD8	A0A024RCA7;P05387;H0YDD8	60S acidic ribosomal protein P2	RPLP2
NaN	NaN	NaN	NaN	NaN	NaN	NaN	NaN	25.531	3	24.2	17.797	412730000	2	B2R9J4;A0A024RCB2;Q16540;A6NJD9;A8MVT4;A8MYK1;H7C2P7	B2R9J4;A0A024RCB2;Q16540;A6NJD9;A8MVT4;A8MYK1	39S ribosomal protein L23, mitochondrial	MRPL23
27.1307	26.6902	26.9579	26.9361	26.4561	NaN	NaN	27.1956	NaN	2	26.1	17.963	812810000	14	E9PJK1;E9PRJ8;H0YDL9;H0YDJ9;A0A024RCB7;E9PIF1;A6NMH8;P60033;E9PM31;H0YEE2	E9PJK1;E9PRJ8;H0YDL9;H0YDJ9;A0A024RCB7;E9PIF1;A6NMH8;P60033;E9PM31;H0YEE2	Tetraspanin;CD81 antigen	CD81
25.7392	26.8975	26.5795	26.4219	26.7238	26.9336	26.9092	26.993	27.0684	5	30.9	21.908	934450000	27	C9JJV1;A0A024RCB9;Q9Y5U2;A6NCC9;E9PME3;C9JHT9;E9PL88;C9JDU0	C9JJV1;A0A024RCB9;Q9Y5U2;A6NCC9;E9PME3;C9JHT9	Protein TSSC4	TSSC4
31.6156	31.5443	31.3025	31.4129	31.524	31.5472	31.6304	31.6008	31.6175	10	46.9	42.823	26091000000	92	A0A024RCC9;B7ZB83;Q99733;B7ZAK9;B4DS05;B7ZAC7;A8MXH2;C9J6D1;C9JZI7;E9PS34;E9PNJ7;E9PNW0;E9PJJ2;E9PKT8;E9PP22;H0YCI4;E9PKI2;C9J1B1	A0A024RCC9;B7ZB83;Q99733;B7ZAK9;B4DS05;B7ZAC7;A8MXH2;C9J6D1;C9JZI7;E9PS34;E9PNJ7;E9PNW0;E9PJJ2;E9PKT8	Nucleosome assembly protein 1-like 4	NAP1L4
24.1165	NaN	NaN	NaN	24.8754	24.7336	NaN	24.6997	24.5305	3	5.1	76.019	231450000	6	B2R7R4;A8K973;A0A024RCF8;Q71SF7;Q96C24	B2R7R4;A8K973;A0A024RCF8;Q71SF7;Q96C24	Synaptotagmin-like protein 4	SYTL4
27.4499	27.4782	27.3876	27.7514	27.2889	27.5851	27.3177	27.2687	27.2285	9	32.2	42.572	1581200000	22	A8K5B0;A0A024RCF9;Q9UH62	A8K5B0;A0A024RCF9;Q9UH62	Armadillo repeat-containing X-linked protein 3	ARMCX3
31.9159	31.9038	31.9244	32.2378	32.0835	32.1621	31.7033	31.5478	31.7404	30	50.1	85.472	34107000000	264	A0A024RCG3;P49589;B4DKY1;Q53HG6;A8MVQ3;A8K067;B4DI19;Q59HE5;C9JLN0;E9PRS8	A0A024RCG3;P49589;B4DKY1;Q53HG6;A8MVQ3;A8K067;B4DI19	Cysteine--tRNA ligase, cytoplasmic	CARS
NaN	NaN	NaN	24.2174	NaN	NaN	NaN	NaN	24.2151	2	1.8	85.105	82509000	3	B4DZL4;A0A024RCG4;Q92674	B4DZL4;A0A024RCG4;Q92674	Centromere protein I	FSHPRH1;CENPI
32.3373	33.6953	33.0649	33.1672	33.941	33.2443	33.2446	33.1923	33.4793	2	52.4	13.904	89591000000	8	A0A024RCJ2;Q16778;P33778;P23527;P06899;Q8N257;Q6DRA6;Q6DN03	A0A024RCJ2;Q16778;P33778;P23527;P06899;Q8N257	Histone H2B;Histone H2B type 2-E;Histone H2B type 1-B;Histone H2B type 1-O;Histone H2B type 1-J;Histone H2B type 3-B	HIST1H2BJ;HIST2H2BE;HIST1H2BB;HIST1H2BO;HIST3H2BB
27.9578	27.7825	27.7791	27.9441	27.6623	27.5111	27.6292	27.5338	27.3024	4	10	67.958	1818000000	37	A0A1U9X8D3;A0A1U9X8D1;A0A1U9X8C7;A0A1U9X8C1;A0A0G2JHC2;A0A024RCJ8;Q6NYC8	A0A1U9X8D3;A0A1U9X8D1;A0A1U9X8C7;A0A1U9X8C1;A0A0G2JHC2;A0A024RCJ8;Q6NYC8	Phostensin	hCG_1821276;PPP1R18
25.938	25.9229	26.0578	26.0444	26.0902	26.5025	26.0062	26.0893	26.0406	5	12.5	65.815	595530000	14	A0A024RCK7;Q15776;Q59HG5	A0A024RCK7;Q15776;Q59HG5	Zinc finger protein with KRAB and SCAN domains 8	ZNF192;ZKSCAN8
31.5776	31.4897	31.4505	31.8436	31.532	31.4958	31.5079	31.6139	31.3987	11	61.2	48.991	26421000000	108	A0A024RCM3;Q13838;Q5STU3;A0A0G2JJZ9;B4DP52;F6WLT2;A0A140T9X3;A0A0A0MT12;F6TRA5;F6S4E6;Q59G92;A0A140T996;A0A140T9X9;F6UJC5;A0A140TA18;F6R6M7;A0A140T973;A0A140T9K1;F6QYI9;A0A0G2JJL7;B4DIJ6;A0A140T9L4;H0Y400;B4DIZ8;Q7KYK3;A0A0G2JHN7;F6U6E2;F6S2B7;A0A140T9K2;A0A140T9N3;F6SXL5;B4DH55;H0YCC6	A0A024RCM3;Q13838;Q5STU3;A0A0G2JJZ9;B4DP52;F6WLT2;A0A140T9X3;A0A0A0MT12;F6TRA5;F6S4E6;Q59G92	Spliceosome RNA helicase DDX39B	hCG_2005638;DDX39B
33.1059	33.126	33.0588	33.0978	32.9155	33.0161	33.0469	33.0111	32.9213	48	52.7	140.46	73896000000	354	A0A1U9X9D5;A0A1U9X9C7;A0A1U9X9C4;A0A1U9X9C1;A0A024RCN6;P26640;A0A1U9X9C8;A0A1U9X9A3;A0A1U9X9A1;A0A140T936;B4DT32;A0A140T954;H0Y426;A2ABF4;A0A0G2JJT9;A0A140T904	A0A1U9X9D5;A0A1U9X9C7;A0A1U9X9C4;A0A1U9X9C1;A0A024RCN6;P26640;A0A1U9X9C8;A0A1U9X9A3;A0A1U9X9A1;A0A140T936	Valine--tRNA ligase	VARS
26.6029	27.2881	26.7886	27.0067	26.8021	26.5935	27.0521	26.8527	26.7274	10	9.4	129.03	1039000000	35	A0A0G2JIS2;A0A1U9X7P8;A0A024RCN9;B7Z852;A2ABF8;A0A0G2JIR1;A2ABF9;A0A0G2JK64;Q96KQ7;Q59FM7;A0A0G2JRR0;A0A0G2JRN8;H0Y4K5	A0A0G2JIS2;A0A1U9X7P8;A0A024RCN9;B7Z852;A2ABF8;A0A0G2JIR1;A2ABF9;A0A0G2JK64;Q96KQ7;Q59FM7;A0A0G2JRR0;A0A0G2JRN8	Histone-lysine N-methyltransferase EHMT2	EHMT2
NaN	NaN	NaN	22.233	NaN	NaN	NaN	NaN	NaN	2	9.5	24.098	33328000	2	F8WC68;A0A024RCP2;A0A024RCW7;A0A1U9X7P1;A0A1U9X7N5;A0A024RCW8;O77932	F8WC68;A0A024RCP2;A0A024RCW7;A0A1U9X7P1;A0A1U9X7N5;A0A024RCW8;O77932	Decapping and exoribonuclease protein	DXO;DOM3Z
26.998	27.0766	27.2111	27.051	26.8616	27.084	26.8923	26.8908	27.1361	3	13.6	34.225	1144300000	11	A0A1U9X8D2;A0A0G2JH76;A0A024RCQ8;A0A140T8X7;Q9UMR5;G8JLL2;A0A0G2JK02;A0A0G2JIU6;A0A0G2JHB6;A0A0G2JKR3;A0A140T9Y1;A8K358;A0A0G2JLL3;A0A0G2JLA3;A0A0G2JLK3;B7Z424;A2ABN7;A0A0G2JK07;A0A0G2JID8	A0A1U9X8D2;A0A0G2JH76;A0A024RCQ8;A0A140T8X7;Q9UMR5;G8JLL2;A0A0G2JK02;A0A0G2JIU6;A0A0G2JHB6;A0A0G2JKR3;A0A140T9Y1;A8K358;A0A0G2JLL3;A0A0G2JLA3	Lysosomal thioesterase PPT2	hCG_1999928;PPT2
28.2856	28.4621	28.4825	28.8341	28.5702	28.7719	28.6801	28.4514	28.5201	8	21.2	53.828	3340300000	48	Q6P458;B4DYK6;A0A1U9X7R2;A0A024RCR2;P36915;B4DWZ0;B7ZAS6;B4DNS8;Q0EFC6;A0A140T8Y2;Q96QB8;A8MPZ0;Q86Z07;A2AB27	Q6P458;B4DYK6;A0A1U9X7R2;A0A024RCR2;P36915;B4DWZ0;B7ZAS6;B4DNS8;Q0EFC6;A0A140T8Y2;Q96QB8;A8MPZ0;Q86Z07	Guanine nucleotide-binding protein-like 1	GNL1;HSR1
27.7116	27.5437	27.8226	27.713	27.6814	27.6141	27.9161	27.7922	27.9781	9	37.4	45.881	1896000000	31	A0A024RCR3;P40425;Q7KZE5;A0A1U9X8A2;A0A1U9X8A1;Q6NW39;U3KQA2;B7Z4A9;Q5JS98;Q9BYU1;P40426;H3BLX0;H0YL59;B7Z789;H0Y5D0;B7Z5Q0;A0A024R864;Q96AL5	A0A024RCR3;P40425;Q7KZE5;A0A1U9X8A2;A0A1U9X8A1;Q6NW39	Pre-B-cell leukemia transcription factor 2	hCG_2039588;PBX2
27.5457	27.3675	27.4442	27.642	27.5841	27.4629	27.7965	27.9629	27.7184	12	27.6	88.06	1739300000	28	A0A024RCR5;P25440;X5CF57;H0Y6K2;A0A140T9E9;A0A0G2JK44;A0A140T9V2;A0A1U9X7B3;A0A1U9X7B8;A0A1U9X7B4;A0A1U9X7A8;U3KQA6;A0A0G2JHL0;A0A140T9F7;E9PIQ3;H0Y799;A0A140T9X8;A0A0G2JHN8;E9PKQ9;A0A140T9I1;H0YDJ7;U3KPW0	A0A024RCR5;P25440;X5CF57;H0Y6K2;A0A140T9E9;A0A0G2JK44;A0A140T9V2;A0A1U9X7B3;A0A1U9X7B8;A0A1U9X7B4;A0A1U9X7A8;U3KQA6;A0A0G2JHL0;A0A140T9F7;E9PIQ3	Bromodomain-containing protein 2	BRD2
31.6154	31.397	31.5046	31.4352	31.0667	31.0111	31.2887	31.3091	31.0818	26	31.7	118.65	22472000000	191	A0A1U9X7A9;A0A1U9X7A6;A0A024RCR6;A0A0G2JK23;P46379;A0A0G2JL47;X6REW1;A0A0G2JJM1;F6S6P2;F6UR09;F6U1F2;F6XTU0;A0A0G2JJR8;A0A1B0GX79;F6WML8;F6VEM6;F6X9W3;F6U341;H0Y710;H0Y4L1;F6TC96;H0Y7K4;H0Y759;A0A0G2JJ92;A0A0G2JIB3;A0A0G2JIA9	A0A1U9X7A9;A0A1U9X7A6;A0A024RCR6;A0A0G2JK23;P46379;A0A0G2JL47;X6REW1;A0A0G2JJM1	Large proline-rich protein BAG6	BAT3;BAG6
27.7734	28.0919	28.2659	28.0659	28.4122	28.3352	28.5471	28.7438	28.7965	7	14.5	81.386	2916100000	20	B2R7M0;A8K822;A0A1U9X7L0;A0A024RCS3;B4E1C1;Q9UER7;Q59FG7;Q53F85;Q5STR5;Q4VX54	B2R7M0;A8K822;A0A1U9X7L0;A0A024RCS3;B4E1C1;Q9UER7;Q59FG7;Q53F85	Death domain-associated protein 6	DAXX
29.5117	29.4083	29.5378	29.7629	29.526	29.7889	29.5323	29.6221	29.4706	11	24.2	73.678	6698800000	77	A0A1U9X7Y0;A0A1U9X7X5;A0A024RCS7;Q9BW19;B4E063;B4DMA8;A0A087X1W5;A2AB20;A0A140T9E6	A0A1U9X7Y0;A0A1U9X7X5;A0A024RCS7;Q9BW19;B4E063;B4DMA8	Kinesin-like protein;Kinesin-like protein KIFC1	KIFC1
27.0707	26.9546	27.0734	27.1595	27.135	27.0977	26.4515	26.5712	26.1866	3	10.9	47.625	1038700000	18	A0A1U9X8L5;A0A0G2JKZ1;A0A024RCT1;A2AB90;A0A0G2JH37;A0A0A0MSV9;O15533;A0A0A0MT98;Q6P1N7;C9JA35;B7Z4V3	A0A1U9X8L5;A0A0G2JKZ1;A0A024RCT1;A2AB90;A0A0G2JH37;A0A0A0MSV9;O15533;A0A0A0MT98	Tapasin	TAPBP
31.8957	32.0131	32.2094	32.1914	32.0033	32.1568	32.007	32.2061	32.0321	4	7.6	34.301	38152000000	72	B4DWA0;A0A024RCT9;P17096	B4DWA0;A0A024RCT9;P17096	High mobility group protein HMG-I/HMG-Y	HMGA1
NaN	24.7976	NaN	25.266	25.1627	25.2009	25.0105	24.9576	NaN	2	6.8	37.634	334270000	6	E7EX64;B4DHU8;B4DGI1;A0A024RCW5;Q9H176;A0A024RCU3;A0A024RD10;E7EN86;P36508;P52747;B7Z851	E7EX64;B4DHU8;B4DGI1;A0A024RCW5;Q9H176;A0A024RCU3;A0A024RD10;E7EN86;P36508;P52747;B7Z851	Zinc finger protein 76;Zinc finger protein 143	ZNF76;ZNF143
29.8333	29.8885	29.7864	29.8495	29.5998	29.7912	30.4642	30.4713	30.2301	10	19.3	61.962	9223100000	59	A0A024RCU9;H3BLV9;Q96SB4;A8K8B2;D6RBM8;A8MPP7;A8MPY5;E7ETV6;Q59GF4;Q9UPE1	A0A024RCU9;H3BLV9;Q96SB4;A8K8B2	SRSF protein kinase 1	SRPK1
27.7965	28.2923	28.0329	27.8573	28.245	28.126	27.7659	28.0828	28.2834	4	22.5	27.082	2345400000	18	Q71VH6;A0A024RCV5;Q99943;Q9HBM8;B3KPH3;B4DRH1	Q71VH6;A0A024RCV5;Q99943;Q9HBM8;B3KPH3;B4DRH1	1-acyl-sn-glycerol-3-phosphate acyltransferase;1-acyl-sn-glycerol-3-phosphate acyltransferase alpha	AGPAT1
26.3633	26.1799	26.1917	26.3692	26.2289	NaN	25.9198	26.2297	26.5062	3	23.2	24.618	655830000	13	Q5TH58;A0A024RCW2;Q9H6K1	Q5TH58;A0A024RCW2;Q9H6K1	Uncharacterized protein C6orf106	C6orf106
27.4083	27.1734	26.9919	27.6854	27.7441	27.3268	27.2001	26.8075	26.9545	7	22.6	38.237	1371100000	28	A8YXX5;Q9Y374;A4FVA6;A0A024RD08;A0A024RCX4;H0Y8C3;Q9NZJ7;Q8IW90;B4E0C5	A8YXX5;Q9Y374;A4FVA6;A0A024RD08;A0A024RCX4;H0Y8C3;Q9NZJ7;Q8IW90	Mitochondrial carrier homolog 1	PIG60;MTCH1
29.7617	29.6654	30.2758	30.0146	29.995	29.9668	30.0709	30.1541	30.2978	5	36.1	18.237	9198300000	56	A0A024RCX8;Q9Y3C6	A0A024RCX8;Q9Y3C6	Peptidyl-prolyl cis-trans isomerase;Peptidyl-prolyl cis-trans isomerase-like 1	PPIL1
26.817	26.4862	26.333	26.7537	26.5739	26.5184	26.7595	26.6623	26.5831	5	38.9	14.67	858230000	18	C9JNE2;A0A024RCY9;Q9Y530;C9J5P1;C9JXC3;H7C5Q1;C9JA90;C9IZY1	C9JNE2;A0A024RCY9;Q9Y530;C9J5P1;C9JXC3;H7C5Q1;C9JA90;C9IZY1	O-acetyl-ADP-ribose deacetylase 1	OARD1;C6orf130
27.4421	27.653	27.2742	27.7636	27.2628	27.3702	27.1366	27.0731	27.188	8	20.5	56.974	1438200000	19	A0A024RCZ1;Q8NC56;H7C2Z0;H0Y9B7;D6R958;D6RBV0	A0A024RCZ1;Q8NC56;H7C2Z0	LEM domain-containing protein 2	LEMD2
NaN	NaN	NaN	NaN	24.6415	NaN	NaN	NaN	NaN	3	11.1	68.639	92842000	3	A0A024RCZ8;Q9NSK0;C9JZE5;C9J8T5;H7C4M1	A0A024RCZ8;Q9NSK0;C9JZE5;C9J8T5	Kinesin light chain 4	KLC4
27.7734	27.7735	27.8104	27.691	27.7841	27.6378	28.1175	27.5212	28.0606	5	32.5	18.733	1960900000	33	B4DP77;A0A024RD03;P82664;Q9BZS5	B4DP77;A0A024RD03;P82664	28S ribosomal protein S10, mitochondrial	MRPS10
NaN	NaN	NaN	NaN	NaN	NaN	NaN	NaN	26.3754	4	19.1	30.774	598090000	9	A0A024RD07;Q9BT09;A0A024RCZ2;A0A0C4DFY8	A0A024RD07;Q9BT09;A0A024RCZ2	Protein canopy homolog 3	TNRC5;CNPY3
26.968	27.1338	27.1746	27.0116	26.9362	26.9829	27.1504	26.8603	26.951	8	12.3	104.06	1133800000	36	A0A024RD09;Q13608;Q59H53	A0A024RD09;Q13608;Q59H53	Peroxisome assembly factor 2	PEX6
29.3781	29.532	29.507	29.4298	29.4008	29.3467	29.3841	29.2738	29.3861	13	26.4	69.991	5955900000	74	A0A024RD11;Q14738;A8K6Y2;Q59EF0;H0Y8C4;B4DSD7;E9PFR3;H7C5Q9;H0YJ35	A0A024RD11;Q14738;A8K6Y2;Q59EF0;H0Y8C4;B4DSD7;E9PFR3	Serine/threonine-protein phosphatase 2A 56 kDa regulatory subunit delta isoform	PPP2R5D
29.1027	28.9693	29.0722	29.0032	28.9331	28.9865	29.0269	29.1152	29.1282	11	38.1	41.293	4627000000	45	A0A024RD15;Q16539;L7RSM2;B5TY33;B4E0K5;H7C4E2;E7EX54	A0A024RD15;Q16539;L7RSM2;B5TY33;B4E0K5	Mitogen-activated protein kinase;Mitogen-activated protein kinase 14	MAPK14
28.1499	27.9535	28.0481	27.97	27.6686	27.7318	27.6769	27.6089	27.6185	6	23	54.19	2011100000	28	A0A024RD18;Q15208;B2R6F9;H0YGN4;Q9UPD3;A0A024RAW5	A0A024RD18;Q15208;B2R6F9	Serine/threonine-protein kinase 38	STK38
NaN	NaN	NaN	NaN	NaN	NaN	NaN	NaN	21.7528	2	13.5	33.356	76204000	1	A0A0U4C5A9;A0A024RD22;K9JA49;P23511	A0A0U4C5A9;A0A024RD22;K9JA49;P23511	Nuclear transcription factor Y subunit alpha	NFYA
25.6108	NaN	25.6106	NaN	NaN	25.7519	25.2078	25.6338	NaN	2	11.9	30.694	381790000	11	A0A024RD28;Q7L2Z9	A0A024RD28;Q7L2Z9	Centromere protein Q	C6orf139;CENPQ
26.2619	26.4968	26.2226	26.4487	27.2566	26.7862	26.355	26.3351	26.5469	4	11	65.768	821990000	14	A0A024RD30;Q9BX10;H0Y7A5;A8K2K2;Q9P1K2;X6RJ09;H0Y4M5;H0Y5J1	A0A024RD30;Q9BX10;H0Y7A5;A8K2K2;Q9P1K2;X6RJ09	GTP-binding protein 2	GTPBP2
28.1659	28.0345	27.8332	27.6382	27.3958	27.547	27.9129	27.9625	27.5587	3	17	34.156	1974500000	13	B4DSC2;A0A024RD35;Q9NYP7;A0A0A0MTI6;B3KWH9;A0A024RD61	B4DSC2;A0A024RD35;Q9NYP7;A0A0A0MTI6;B3KWH9	Elongation of very long chain fatty acids protein;Elongation of very long chain fatty acids protein 5	ELOVL5
29.2114	29.2893	29.4736	29.4988	29.3687	29.3594	29.4608	29.8657	29.4951	10	40.8	29.669	6199200000	44	A0A024RD36;Q6DKI1;R4GMU7;B3KMP5;A8K5J5;B7Z4G0	A0A024RD36;Q6DKI1;R4GMU7;B3KMP5;A8K5J5;B7Z4G0	60S ribosomal protein L7-like 1	RPL7L1
NaN	NaN	NaN	NaN	NaN	NaN	NaN	NaN	25.0625	2	11	26.659	312110000	2	A0A024RD41;Q9ULC3	A0A024RD41;Q9ULC3	Ras-related protein Rab-23	RAB23
26.8844	26.3436	26.4216	26.2347	26.1421	26.482	26.4354	26.3043	26.244	6	4.8	270.21	746740000	16	A0A024RD47;O75376;Q7Z516;A0A088AWL3;Q3B773;Q6PGR4;Q6NTH1;Q6PDT8;E7EVU5;Q05CG3;E7EW50;J3KS51;Q86W52;A5PKW7;C9JAP0;B4DZ48;J3KT44	A0A024RD47;O75376;Q7Z516;A0A088AWL3	Nuclear receptor corepressor 1	NCOR1
27.863	28.0336	28.1776	28.0808	28.4002	28.3434	28.3473	28.3975	28.3665	6	47.6	15.947	2656400000	57	A0A024RD78;Q6P1L8	A0A024RD78;Q6P1L8	39S ribosomal protein L14, mitochondrial	MRPL14
36.9502	37.276	37.2697	37.2339	37.4573	37.5298	37.675	37.7259	37.6771	56	63.7	83.263	1641000000000	1363	A0A024RD80;P08238;B4DMA2;B4DGL0;Q9H6X9;A8K3W9;Q6PK50;Q58FF7;O14942;Q58FF4	A0A024RD80;P08238;B4DMA2;B4DGL0	Heat shock protein HSP 90-beta	HSP90AB1
28.8871	28.939	29.0184	29.188	29.2594	29.3415	29.0172	28.9206	29.0898	15	28.9	83.134	4719400000	59	A0A024RD82;P22033;T1WHH0;B2R6K1;A0A0S2Z4X4;Q59HB4;A0A0G3IFT0;A0A0K0PWN6;S4UML7;S4UML3	A0A024RD82;P22033;T1WHH0;B2R6K1;A0A0S2Z4X4	Methylmalonyl-CoA mutase, mitochondrial	MUT
33.9841	33.955	33.901	33.9789	33.7719	33.8937	34.0642	33.9721	34.0899	29	65.9	47.079	140220000000	231	A0A024RD93;P22234;E9PBS1;D6RF62;B4DGX3	A0A024RD93;P22234;E9PBS1;D6RF62;B4DGX3	Multifunctional protein ADE2;Phosphoribosylaminoimidazole-succinocarboxamide synthase;Phosphoribosylaminoimidazole carboxylase	PAICS
30.2938	30.2879	30.3142	29.9191	29.9255	30.0271	30.2316	30.2358	30.2744	14	53.8	36.613	10207000000	87	A0A024RD99;B7Z5F9;B3KP14;H0Y8R1;F5H5I6;B7Z3R7;H0YAK1;B3KW50;Q12849;B7Z2D8;H0YAM1	A0A024RD99;B7Z5F9;B3KP14;H0Y8R1;F5H5I6;B7Z3R7;H0YAK1;B3KW50;Q12849;B7Z2D8	G-rich sequence factor 1	GRSF1
28.1732	28.3126	28.322	28.4391	28.1923	28.1223	28.3784	28.1167	28.1782	8	14.4	100.28	2685100000	51	A0A024RDA1;A0A024RDA9;Q9NV70	A0A024RDA1;A0A024RDA9;Q9NV70	Exocyst complex component 1	EXOC1
32.4876	32.6114	32.5884	32.636	32.5702	32.6555	32.5786	32.5797	32.5797	40	49.6	117.97	54084000000	339	A0A024RDB0;A0AVT1;B3KSS1;H0Y8S8;H0Y9U5	A0A024RDB0;A0AVT1;B3KSS1	Ubiquitin-like modifier-activating enzyme 6	UBE1L2;UBA6
33.745	33.6601	33.7286	33.8331	33.8693	34.0425	33.8944	33.9437	34.1084	12	44.3	23.811	142240000000	153	H0YA96;H0Y8G5;Q12771;B4DTC3;A0A024RDF4;A0A024RDB4;A0A024RDF3;Q14103;D6RAF8;D6RF44;B4E0W4;D6RBQ9;D6RD83	H0YA96;H0Y8G5;Q12771;B4DTC3;A0A024RDF4;A0A024RDB4;A0A024RDF3;Q14103;D6RAF8;D6RF44;B4E0W4	Heterogeneous nuclear ribonucleoprotein D0	HNRNPD;HNRPD
31.9457	32.1795	32.0823	32.1939	32.2176	32.2882	32.1083	32.0711	32.046	23	26.8	129.03	39247000000	190	A0A024RDH6;A0A024RDD3;D6REX3;O94979;A0A1S5UZ19;H7BXG7;D6RHZ5;H0YAB3;H0Y8V7;H0Y9K1;H0Y8W8;H0YAF5;H0Y9V3;H0Y9T9;D6RBT0;D6RHE8;D6RE64;D6RCQ9	A0A024RDH6;A0A024RDD3;D6REX3;O94979;A0A1S5UZ19;H7BXG7;D6RHZ5;H0YAB3	Protein transport protein Sec31A	SEC31L1;SEC31A
32.1965	32.1422	32.2051	32.153	32.2306	32.3324	32.2572	32.3032	32.3102	13	45.2	54.12	42747000000	150	A0A024RDE5;Q9UN86	A0A024RDE5;Q9UN86	Ras GTPase-activating protein-binding protein 2	G3BP2
29.3452	29.4973	29.4352	29.5484	29.1865	29.2753	29.3136	29.5909	29.62	4	40.3	63.974	6066100000	28	A0A024RDE8;Q96HC4;Q4W5K9;H0Y8Y3;H0YBI4;A0A0A0MSP3;Q9P1D1;A0A0D9SFR4;H0Y929	A0A024RDE8;Q96HC4;Q4W5K9	PDZ and LIM domain protein 5	PDLIM5;LIM
33.088	32.915	32.8981	32.9226	33	32.9991	33.2975	33.5428	33.3444	18	52.1	40.04	78865000000	124	A0A087WUK2;A0A024RDF6;O14979;B4DTA2;B4DGN3	A0A087WUK2;A0A024RDF6;O14979;B4DTA2	Heterogeneous nuclear ribonucleoprotein D-like	HNRNPDL;HNRPDL
31.938	31.8326	31.7894	32.0138	31.8872	31.8807	31.5956	31.661	31.7196	26	38.5	107.89	31628000000	157	A0A024RDG1;O60763;REV__R4GMN2;REV__Q5VZ89	A0A024RDG1;O60763	General vesicular transport factor p115	VDP;USO1
25.8818	26.5616	26.2688	26.9124	26.4572	26.5006	26.1139	26.453	NaN	5	15.9	48.705	690620000	18	A0A024RDG5;Q53EU6	A0A024RDG5;Q53EU6	Glycerol-3-phosphate acyltransferase 3	HMFN0839;AGPAT9
28.6316	28.7174	28.9562	28.2232	NaN	28.552	30.0349	29.2156	28.9777	2	42.9	11.065	4150800000	17	D6RFM0;D6RAH7;H9KV45;A0A0A0MQU3;A0A024RDH2;A0A087WY85;P62837;P61077	D6RFM0;D6RAH7;H9KV45;A0A0A0MQU3;A0A024RDH2;A0A087WY85;P62837;P61077	Ubiquitin-conjugating enzyme E2 D2;Ubiquitin-conjugating enzyme E2 D3	UBE2D2;UBE2D3
25.5125	27.4927	27.6252	26.2481	28.6088	29.2898	28.8706	28.8791	29.1459	4	21.4	13.293	2921100000	20	A0A024RDH8;P49207;Q5MK14	A0A024RDH8;P49207	60S ribosomal protein L34	RPL34
26.4254	26.7115	26.5499	26.3752	26.4194	26.518	26.1354	26.6387	26.5497	3	28.9	12.592	785350000	13	D6RCM2;A0A024RDH9;Q9Y3D5;H0YAG5;D6RE70	D6RCM2;A0A024RDH9;Q9Y3D5;H0YAG5	28S ribosomal protein S18c, mitochondrial	MRPS18C
28.1431	27.9986	28.1397	28.223	27.9442	28.2289	28.1923	28.2708	28.1732	7	19.4	39.041	2542300000	28	Q96KB3;A0A024RDI6;Q9BW91;Q8NG26;D6RAW2;H7C386;D6R8Z6	Q96KB3;A0A024RDI6;Q9BW91;Q8NG26;D6RAW2;H7C386	ADP-ribose pyrophosphatase, mitochondrial	NUDT9
NaN	NaN	NaN	NaN	NaN	NaN	NaN	NaN	27.136	2	21.7	9.369	1337800000	5	A0A087WUD3;A0A024RDJ1;Q9NRP0	A0A087WUD3;A0A024RDJ1;Q9NRP0	Oligosaccharyltransferase complex subunit OSTC	OSTC;DC2
29.6624	29.1119	29.1915	29.4359	28.9585	29.2777	29.3083	29.3241	29.2546	8	30.4	22.348	5511800000	48	A0A024RDJ3;Q9NY12	A0A024RDJ3;Q9NY12	H/ACA ribonucleoprotein complex subunit 1	NOLA1;GAR1
27.6226	27.4222	27.6348	27.465	27.4241	27.2931	27.8956	27.8033	27.4354	9	12.4	105.35	1672300000	26	A0A024RDJ4;P19838;D6RF93;D6RC45;D6RH30	A0A024RDJ4;P19838	Nuclear factor NF-kappa-B p105 subunit;Nuclear factor NF-kappa-B p50 subunit	NFKB1
NaN	NaN	25.9913	26.2539	NaN	NaN	NaN	25.6759	NaN	2	11	46.666	498540000	11	A0A087WXN4;A0A024RDK4;Q96CB8;E9PGI3	A0A087WXN4;A0A024RDK4;Q96CB8;E9PGI3	Integrator complex subunit 12	INTS12
28.6511	28.0692	28.5453	28.689	28.795	28.9003	28.5222	28.1801	28.1803	6	33.8	24.117	3270300000	37	A0A024RDK8;A0A0S2Z5Q3;J3KQJ1;Q8NBJ7;A0A0S2Z548;B4DLK7;C9JL30;A8MXB9;C9J660;H7C3B2;Q75LP3;F8WA42;E9PBT8;A0A0S2Z5C4;J3QT17;F8WEX5;E9PG02	A0A024RDK8;A0A0S2Z5Q3;J3KQJ1;Q8NBJ7;A0A0S2Z548;B4DLK7;C9JL30;A8MXB9;C9J660;H7C3B2;Q75LP3;F8WA42;E9PBT8	Sulfatase-modifying factor 2	SUMF2;DKFZP566I1024
26.9542	27.0096	27.0572	26.8954	26.9437	27.2114	27.088	27.1733	27.1762	2	21.6	16.871	1175100000	24	A0A024RDL0;H7C0S8;O75575	A0A024RDL0;H7C0S8;O75575	DNA-directed RNA polymerase III subunit RPC9	RCP9;CRCP
34.4141	34.2801	34.2854	34.2362	34.2125	34.348	34.2925	34.2127	34.3157	22	53.5	57.965	176680000000	249	B2R9K8;A0A024RDL1;P40227;B4DPJ8;Q59ET3;B4DN39;Q92526;J3KRI6	B2R9K8;A0A024RDL1;P40227;B4DPJ8;Q59ET3;B4DN39	T-complex protein 1 subunit zeta	CCT6A
29.4639	29.4794	29.9338	30.5262	30.266	30.4843	29.6559	29.3111	29.486	8	50.3	20.745	8452800000	52	C9JBI3;A0A024RDL3;A0A024RDL9;P78330;Q53EY1	C9JBI3;A0A024RDL3;A0A024RDL9;P78330;Q53EY1	Phosphoserine phosphatase	PSPH
25.3366	25.9199	25.5288	25.9705	25.8622	25.8146	26.0534	25.9673	NaN	5	11.6	56.818	488900000	16	A8K3R3;A0A024RDL6;E9PFK9;Q9UJ41;A0A0A0MSJ3;B3KMF1;Q3HKR1	A8K3R3;A0A024RDL6;E9PFK9;Q9UJ41;A0A0A0MSJ3;B3KMF1;Q3HKR1	Rab5 GDP/GTP exchange factor	RABGEF1
26.5879	26.5875	26.7693	26.989	26.4811	27.0512	26.951	26.8495	27.0997	5	28.6	24.565	1003900000	23	B4DU69;A0A024RDL8;P04424;Q6XYD2;A0A0S2Z3B0;A0A0S2Z316;F8W943	B4DU69;A0A024RDL8;P04424;Q6XYD2;A0A0S2Z3B0;A0A0S2Z316	Argininosuccinate lyase	ASL
25.5149	25.5584	25.8165	25.5855	25.4746	25.4211	24.9252	25.3729	25.2846	2	4.7	41.496	388810000	11	A0A1X7SBT5;A0A024RDQ5;Q92664;H7C326;H7BZH7	A0A1X7SBT5;A0A024RDQ5;Q92664;H7C326;H7BZH7	Transcription factor IIIA	GTF3A
24.2824	25.079	24.5943	24.659	24.5708	NaN	NaN	NaN	NaN	5	11.9	31.691	228010000	11	A0A024RDQ7;Q9H2K0	A0A024RDQ7;Q9H2K0	Translation initiation factor IF-3, mitochondrial	MTIF3
28.3918	28.214	28.1875	28.4117	28.5966	28.392	28.9172	28.9004	29.1394	10	38.2	40.57	3416300000	60	Q5U0C2;A0A024RDQ8;P40938;Q53HK8	Q5U0C2;A0A024RDQ8;P40938;Q53HK8	Replication factor C subunit 3	RFC3
26.6724	NaN	NaN	27.4033	27.1498	NaN	26.7247	NaN	NaN	3	4	67.65	934990000	4	B2R728;A0A024RDQ9;P30825;Q5JR49;A0A0A8K9B7;A0A1W2PR06;P52569	B2R728;A0A024RDQ9;P30825;Q5JR49	High affinity cationic amino acid transporter 1	SLC7A1
34.5243	34.6846	34.8011	34.7408	34.701	34.8533	34.8157	34.8348	34.7896	18	57.6	18.311	243110000000	296	Q5T7C4;B7Z965;A0A024RDR0;P09429;Q59GW1;Q9NYD7;B3KQ05;B2RPK0;Q75MM1;D3DQY9	Q5T7C4;B7Z965;A0A024RDR0;P09429;Q59GW1;Q9NYD7;B3KQ05;B2RPK0	High mobility group protein B1;Putative high mobility group protein B1-like 1	HMGB1;HMG1;HMGB1P1
33.1644	33.1793	33.1739	33.1337	33.0488	33.2725	33.667	33.5592	33.4399	39	63.8	96.864	89425000000	328	A0A024RDS1;Q92598;A0A024RDQ0;B4DF68;A0A0A0MSM0;B4DY72;B4DZB4;Q5TBM3;R4GN69;B4DZP3	A0A024RDS1;Q92598;A0A024RDQ0;B4DF68;A0A0A0MSM0;B4DY72;B4DZB4	Heat shock protein 105 kDa	HSPH1
NaN	25.1867	24.9414	24.7358	24.769	NaN	NaN	NaN	NaN	4	4.3	139.73	203230000	9	A8K126;A0A024RDS3;Q9UBW7;A0A087X151	A8K126;A0A024RDS3;Q9UBW7;A0A087X151	Zinc finger MYM-type protein 2	ZNF198;ZMYM2
26.1632	26.768	26.5331	26.679	26.9134	26.9115	26.5161	27.0434	26.7603	5	37.2	21.681	924610000	21	B2RE68;A0A024RDT6;Q5W111	B2RE68;A0A024RDT6;Q5W111	SPRY domain-containing protein 7	C13orf1;SPRYD7
24.6192	24.8127	24.7423	25.2038	24.8683	24.8738	NaN	NaN	24.4681	3	3.5	125.82	211580000	10	A0A024RDV5;A0A024RDT9;Q9Y2H6;H7C507;G5E9X3	A0A024RDV5;A0A024RDT9;Q9Y2H6	Fibronectin type-III domain-containing protein 3A	FNDC3A
NaN	NaN	NaN	NaN	NaN	NaN	NaN	NaN	23.0874	2	8.8	51.918	21793000	0	B4E2C8;G5E9X1;B3KQH5;A0A024RDU0;Q9UL03;B9EIK3;A0A1W2PPI5;Q5JSJ4	B4E2C8;G5E9X1;B3KQH5;A0A024RDU0;Q9UL03;B9EIK3;A0A1W2PPI5;Q5JSJ4	Integrator complex subunit 6;Protein DDX26B	INTS6;DDX26B
27.3014	27.2129	27.4768	27.71	27.5844	27.8671	27.3068	27.4596	27.4402	8	18.9	67.052	1584300000	38	A0A0U1RRL5;A0A024RDU6;P32519;Q6MZZ4;B3KTE9	A0A0U1RRL5;A0A024RDU6;P32519;Q6MZZ4	ETS-related transcription factor Elf-1	ELF1;DKFZp686H0575
29.5283	29.7525	29.7811	29.5238	29.6317	29.5995	29.6999	29.6233	29.7032	10	48.6	28.38	7070600000	53	A0A024RDU9;P13984	A0A024RDU9;P13984	General transcription factor IIF subunit 2	GTF2F2
NaN	25.8305	NaN	NaN	NaN	NaN	NaN	NaN	NaN	6	8.5	104.15	294280000	7	B4DTN0;A0A024RDV3;Q59HH0;P06400;B4DRB3;Q6LE65;V9H020;A0A0X9QC09;Q6LE82	B4DTN0;A0A024RDV3;Q59HH0;P06400;B4DRB3	Retinoblastoma-associated protein	RB1
29.9717	30.0931	29.9766	29.9268	29.8808	30.1211	30.239	30.1771	30.2745	10	24.6	57.81	9499800000	64	A0A024RDV7;O00505;Q53F09;H0Y4S9	A0A024RDV7;O00505;Q53F09	Importin subunit alpha;Importin subunit alpha-4	KPNA3
28.3225	28.217	28.1756	28.1781	28.1609	28.3008	28.4779	28.3147	28.4282	8	23.7	72.831	2761800000	32	A8K6Q9;A0A024RDV9;Q8N0X7;B4DXT5;B3KML8;B3KMI3;A0A0S2Z510	A8K6Q9;A0A024RDV9;Q8N0X7;B4DXT5;B3KML8	Spartin	SPG20
27.4926	28.2874	28.5525	28.4713	28.7896	29.331	29.0741	29.0166	29.0672	5	17.6	33.216	3772200000	23	A0A024RDW4;Q9NWB6;B4E3J6;X6R9F1	A0A024RDW4;Q9NWB6;B4E3J6	Arginine and glutamate-rich protein 1	FLJ10154;ARGLU1
NaN	NaN	NaN	NaN	NaN	NaN	NaN	NaN	25.4313	2	3.3	68.411	344030000	5	A0A140VJG7;A0A024RDW5;B4DG73;Q9Y2V7	A0A140VJG7;A0A024RDW5;B4DG73;Q9Y2V7	Conserved oligomeric Golgi complex subunit 6	COG6
NaN	NaN	NaN	NaN	NaN	NaN	NaN	25.2666	25.0967	2	2.8	110.3	171770000	6	Q17RT3;F5H562;E7ET55;B7ZLR3;F5H748;B7ZLR2;B7ZLR4;A0A024RDX3;P35670;G1FFE9;G1FFF1;A6N865;A6YQZ0;B4DXQ1;A0A0U1RQY8	Q17RT3;F5H562;E7ET55;B7ZLR3;F5H748;B7ZLR2;B7ZLR4;A0A024RDX3;P35670;G1FFE9;G1FFF1;A6N865;A6YQZ0;B4DXQ1;A0A0U1RQY8	Copper-transporting ATPase 2;WND/140 kDa	ATP7B
NaN	NaN	NaN	NaN	NaN	26.3535	NaN	NaN	NaN	3	17.3	34.678	458540000	2	B4DKX7;A0A024RDX4;Q8IW45;B3KSJ9;B4DQR1;O95333	B4DKX7;A0A024RDX4;Q8IW45;B3KSJ9;B4DQR1	ATP-dependent (S)-NAD(P)H-hydrate dehydratase	CARKD;FLJ10769
32.4552	32.3673	32.3238	32.3465	32.1818	32.1122	32.3743	32.376	32.3096	38	50.7	123.63	45161000000	229	A0A024RDY0;O00410;H0Y8C6;B4E0R6;B3KWG6;E7ETV3;H0Y3V4;C9JMV5;E7EQT5;Q9BVS9;C9JZD8;E7EV12;C9JZ53;C9JQT6;E7ESA1;E7ESZ1;E7EWK4;E7EX05;E7ETV8;C9J875;B4DTX6	A0A024RDY0;O00410;H0Y8C6;B4E0R6;B3KWG6	Importin-5	RANBP5;IPO5
28.5063	28.0517	28.1756	28.5742	28.2841	28.2266	28.4269	28.3622	28.2401	5	12.9	42.585	2820100000	26	B3KRY3;A0A024RDY3;P11279;Q59FZ0	B3KRY3;A0A024RDY3;P11279	Lysosome-associated membrane glycoprotein 1	LAMP1
27.409	27.8293	27.7368	27.7332	27.6681	27.6237	27.1642	27.4736	27.6032	7	15.9	73.139	1691800000	33	A0A024RDY9;B1ALK7;B7Z6G2;E9PDQ5;Q14155;E7EUY6;B7Z344;Q5W9H1;Q8N4Q3;B7Z3C7;Q15052;F6SJA5	A0A024RDY9;B1ALK7;B7Z6G2;E9PDQ5;Q14155;E7EUY6;B7Z344;Q5W9H1	Rho guanine nucleotide exchange factor 7	ARHGEF7;KIAA0142
NaN	NaN	NaN	NaN	NaN	23.8819	NaN	NaN	NaN	2	10.2	21.22	65640000	2	A0A0C4DFW4;B2RC94;A0A024RDZ1;Q5JUR7	A0A0C4DFW4;B2RC94;A0A024RDZ1;Q5JUR7	Testis-expressed sequence 30 protein	TEX30;RP11-484I6.3
27.9285	28.1004	28.1006	28.4396	27.946	27.835	27.6573	27.7876	27.7475	6	12.7	71.655	2196800000	25	A0A024RDZ2;Q13042;Q5T8C6;B2RCW0;Q59EG1;B4DK74	A0A024RDZ2;Q13042;Q5T8C6;B2RCW0	Cell division cycle protein 16 homolog	CDC16
26.2672	26.8094	25.9901	25.9237	26.3977	NaN	26.7642	25.958	26.2464	5	16.1	33.783	652250000	14	A0A024RDZ9;A8K097;A0A024RE04;Q5JVF3	A0A024RDZ9;A8K097;A0A024RE04;Q5JVF3	PCI domain-containing protein 2	RP11-98F14.6;PCID2
NaN	NaN	NaN	NaN	NaN	NaN	NaN	NaN	24.4878	3	3.6	156.34	177380000	2	A0A024RE13;Q9NRR4;Q59FF9;H7C5U6	A0A024RE13;Q9NRR4;Q59FF9	Ribonuclease 3	RNASEN;DROSHA
26.3057	NaN	NaN	NaN	NaN	NaN	NaN	NaN	NaN	3	9	49.967	435950000	9	A0A024RE14;Q49AR2;A0A024RE20	A0A024RE14;Q49AR2;A0A024RE20	UPF0489 protein C5orf22	FLJ11193;C5orf22
28.7249	28.2286	28.6859	28.6103	28.2645	28.7754	28.649	28.5311	28.5907	9	41.7	34.596	3347500000	35	A0A024RE27;Q96GK7;C9JGM0;Q6P2I3;B4DHE4;D3DXG4;D3DXG5;C9J5B6	A0A024RE27;Q96GK7;C9JGM0;Q6P2I3	Fumarylacetoacetate hydrolase domain-containing protein 2A;Fumarylacetoacetate hydrolase domain-containing protein 2B	FAHD2A;FAHD2B
30.8736	30.3141	30.491	30.5691	30.0942	29.8968	29.9295	30.3074	30.3612	5	70.5	13.738	11458000000	33	Q14XT3;H9E7F7;H9E7P8;A0A1B1PEQ8;H9E7W2;H9E7T7;X5C6M5;X5BKA4;X2CK15;W8DFH5;W8DBX9;W8D4U9;W8D1X2;V9K571;V9JPM6;V9J3S1;U5Z9R9;U5Z487;U3LSI8;U3L556;T1SWS8;T1Q632;S4STI1;Q9B2U8;Q9B138;Q8WCW3;Q8HNR1;Q85KS0;Q7YCE6;Q7Y6N0;Q7Y6M3;Q7Y626;Q6VJJ3;Q6VJD8;Q6VIG7;Q6RQ80;Q6RNN7;Q6RKW8;Q6R0V6;Q5SB08;Q5SAP1;Q5SA98;Q5S971;Q4GVP5;Q4GHE1;Q4GCZ4;Q4GCG2;Q4GCC3;Q4F4V6;Q4EZD4;Q305H0;Q19MP7;Q15HH9;Q0Z7S0;Q0Z7J0;Q0Z7F1;Q09…	Q14XT3;H9E7F7;H9E7P8;A0A1B1PEQ8;H9E7W2;H9E7T7;X5C6M5;X5BKA4;X2CK15;W8DFH5;W8DBX9;W8D4U9;W8D1X2;V9K571;V9JPM6;V9J3S1;U5Z9R9;U5Z487;U3LSI8;U3L556;T1SWS8;T1Q632;S4STI1;Q9B2U8;Q9B138;Q8WCW3;Q8HNR1;Q85KS0;Q7YCE6;Q7Y6N0;Q7Y6M3;Q7Y626;Q6VJJ3;Q6VJD8;Q6VIG7;Q6RQ80;Q6RNN7;Q6RKW8;Q6R0V6;Q5SB08;Q5SAP1;Q5SA98;Q5S971;Q4GVP5;Q4GHE1;Q4GCZ4;Q4GCG2;Q4GCC3;Q4F4V6;Q4EZD4;Q305H0;Q19MP7;Q15HH9;Q0Z7S0;Q0Z7J0;Q0Z7F1;Q09…	Cytochrome c oxidase subunit 2	COX2;COII;MT-CO2;cox2
28.177	28.2249	28.3524	28.3078	28.058	28.3158	28.5342	28.2162	28.0812	10	24	76.856	2723600000	22	I6L996;E9PEI4;Q8N9D7;H0YB16;B4DH13;H0YBZ1;Q59GN8;Q59GM6;H0YBP1;A0A059VC25;Q658W2;E7ESA6;Q05397;B4DWJ1;A0A024R9H6;E5RHD8;E5RI03;E5RJQ2;E5RG80;E5RHK7;E5RJI4	I6L996;E9PEI4;Q8N9D7;H0YB16;B4DH13;H0YBZ1;Q59GN8;Q59GM6;H0YBP1;A0A059VC25;Q658W2;E7ESA6;Q05397;B4DWJ1;A0A024R9H6	Focal adhesion kinase 1	PTK2;FAK;DKFZp666O0110
23.3062	NaN	NaN	NaN	NaN	NaN	NaN	NaN	NaN	2	13.5	26.366	53745000	2	Q9MY63;E1XUP8;V6CJI7;U6EFV2;U6BZR6;S5TLC0;S5DU27;S5DU24;S5DU19;S5DU16;S5DTZ1;S5DN91;S5DN86;S5DN81;S5DLI1;S5DLH0;S5DLD6;S5DI47;S5DI40;S5DI37;S5DHS8;S5DHS4;S5DHR9;S5DHR6;R9RIA8;R9RFL1;R4RWV9;R4RUI3;Q5R1M1;Q2UV93;N1NRY1;M5DCF8;L7UZX8;K4ULG4;I7HDU6;I7H542;I7GVS4;I7GSS2;H8XBU0;H6SSQ4;H2ALZ7;G9MD20;G9MCL4;G4V595;G0WJF3;F5CR31;F4ZZU8;F2XI59;F1C8N6;E9ABX8;E3Q1I3;E3Q0Y4;E1CJE5;E1CJE4;E1CJE3;E0WN25;E0WMT8;…	Q9MY63;E1XUP8;V6CJI7;U6EFV2;U6BZR6;S5TLC0;S5DU27;S5DU24;S5DU19;S5DU16;S5DTZ1;S5DN91;S5DN86;S5DN81;S5DLI1;S5DLH0;S5DLD6;S5DI47;S5DI40;S5DI37;S5DHS8;S5DHS4;S5DHR9;S5DHR6;R9RIA8;R9RFL1;R4RWV9;R4RUI3;Q5R1M1;Q2UV93;N1NRY1;M5DCF8;L7UZX8;K4ULG4;I7HDU6;I7H542;I7GVS4;I7GSS2;H8XBU0;H6SSQ4;H2ALZ7;G9MD20;G9MCL4;G4V595;G0WJF3;F5CR31;F4ZZU8;F2XI59;F1C8N6;E9ABX8;E3Q1I3;E3Q0Y4;E1CJE5;E1CJE4;E1CJE3;E0WN25;E0WMT8;…	HLA class I histocompatibility antigen, Cw-5 alpha chain;HLA class I histocompatibility antigen, Cw-12 alpha chain;HLA class I histocompatibility antigen, Cw-8 alpha chain;HLA class I histocompatibility antigen, Cw-17 alpha chain;HLA class I histocompatibility antigen, B-35 alpha chain;HLA class I histocompatibility antigen, B-78 alpha chain;HLA class I histocompatibility antigen, B-53 alpha chai…	HLA-Cw;HLA-C;HLAC;HLA-B;Cw*08;HLA C;HLA-Cw*;Cw;HLA;B-3501;DKFZp686N10220;HLA-B35;HLA-B*3512;MHC;HLA-CW
25.401	25.5262	25.4198	25.7672	25.5163	25.3325	24.8871	25.3537	24.7622	3	7	44.37	360230000	10	A0A068F4C8;B7Z731;A0A0G2JNZ5;A0A068F753;A0A068F579;A0A0G2JNZ0;B7Z7G9;B7Z6E6;D3DV87;B2R6A7;A0A0G2JLB3;A0A068F658;B7Z6S9;P04062;A0A068F661;B3KQW3;B4DHT6;A0A068FB60;B4DMV8	A0A068F4C8;B7Z731;A0A0G2JNZ5;A0A068F753;A0A068F579;A0A0G2JNZ0;B7Z7G9;B7Z6E6;D3DV87;B2R6A7;A0A0G2JLB3;A0A068F658;B7Z6S9;P04062;A0A068F661;B3KQW3;B4DHT6;A0A068FB60	Glucosylceramidase	GBA
23.4953	NaN	NaN	NaN	NaN	NaN	NaN	NaN	NaN	2	3.2	129.6	31292000	1	A0A075B6T1;B4DZ97;Q9C0C7	A0A075B6T1;B4DZ97;Q9C0C7	Activating molecule in BECN1-regulated autophagy protein 1	AMBRA1
NaN	NaN	NaN	NaN	NaN	NaN	NaN	NaN	25.1943	2	29.9	10.688	299720000	10	A0A075B746;P82921	A0A075B746;P82921	28S ribosomal protein S21, mitochondrial	MRPS21
30.0621	31.8272	31.1224	31.3938	32.3314	30.3694	30.6771	30.8433	30.3298	6	10.6	40.078	20258000000	39	B4E312;A0A075B7D9;Q92804	B4E312;A0A075B7D9;Q92804	TATA-binding protein-associated factor 2N	TAF15
27.6565	28.1828	27.8765	28.0253	27.7279	27.8289	27.3782	27.6309	27.6568	11	13.2	125.09	1937300000	45	A0A075B7F8;A8CG34;A0A087WY75;B4DET5;C9JFL1;L0R526	A0A075B7F8;A8CG34;A0A087WY75	Nuclear envelope pore membrane protein POM 121C	POM121C
26.534	26.294	26.3292	26.4255	25.9827	26.2872	26.629	26.7975	26.2868	6	9.3	82.869	760060000	15	U4PCV3;G0TQY7;C7TP28;B5U6Z5;A0A0A1TE50;A0A077QPI2;A0A077QP03;P23276;D8MJ82;Q0KH93;Q0KH95;Q0KH92;Q0KH91;Q0KH90;Q0KH88;Q0KH87;E9PHG0;H0Y8A1;E7ETW3;A0A1W6BTL0;Q0KH86;Q0KH85;X5FSQ3	U4PCV3;G0TQY7;C7TP28;B5U6Z5;A0A0A1TE50;A0A077QPI2;A0A077QP03;P23276;D8MJ82;Q0KH93;Q0KH95;Q0KH92;Q0KH91;Q0KH90;Q0KH88;Q0KH87	Kell blood group glycoprotein	KEL
NaN	NaN	24.9885	NaN	24.4823	24.8428	24.4149	24.2272	NaN	2	45.7	5.1038	145820000	8	A0A120HB06;A0A109PLW1;M0R1Z8;M0R1K0;A0A0X8AT33;M0QZM6;A0A0X8AXX1;A0A0X8ASA9;A0A0X9JZX1;A0A0X8AT42;A0A087WSV0;I6LK00;I6LLZ7;I6LJZ6;I6LJZ9;I6LJZ8;A0A0X9JFN5;I6LJZ5;A0A0X9JA59;I6LJZ7;Q9HB09	A0A120HB06;A0A109PLW1;M0R1Z8;M0R1K0;A0A0X8AT33;M0QZM6;A0A0X8AXX1;A0A0X8ASA9;A0A0X9JZX1;A0A0X8AT42;A0A087WSV0;I6LK00;I6LLZ7;I6LJZ6;I6LJZ9;I6LJZ8;A0A0X9JFN5;I6LJZ5;A0A0X9JA59;I6LJZ7;Q9HB09	Bcl-2-like protein 12	BCL2L12
29.8073	29.7407	29.7923	30.0535	29.69	29.8826	30.0873	29.7112	29.9249	11	34	50.222	8155700000	79	V9HW75;A0A087WSV8;P80303;Q2L696;E9PKG6;H0YEG8;E9PLR0;E9PLE9;H0YD18;A0A097EV82;E9PJP3;A7LNF5;E9PM22	V9HW75;A0A087WSV8;P80303;Q2L696;E9PKG6	Nucleobindin-2;Nesfatin-1	HEL-S-109;NUCB2;Nucb2
25.3429	25.3231	25.5069	26.0006	25.7991	25.1081	25.2698	25.7015	25.8618	5	6.9	81.035	421630000	12	A0A087WSW7;F6XU50;Q6I7N8;A0A0B4J1V9;Q9NRZ9;B1ALG6;Q9NW36	A0A087WSW7;F6XU50;Q6I7N8;A0A0B4J1V9;Q9NRZ9	Lymphoid-specific helicase	HELLS
NaN	NaN	NaN	NaN	NaN	NaN	NaN	NaN	26.2671	2	23.1	15.619	526640000	1	D3DVB3;A0A087WT04;U3KQ54;Q6P1K2	D3DVB3;A0A087WT04;U3KQ54;Q6P1K2	Polyamine-modulated factor 1	hCG_1999356;PMF1-BGLAP;PMF1
28.5635	28.5614	28.7108	28.6247	28.6847	28.9589	28.9944	29.1992	29.0054	9	20.6	67.55	3986400000	35	A0A087WT20;Q9NV06;B3KME9;E5RHM4;A0A087X1F8	A0A087WT20;Q9NV06;B3KME9;E5RHM4	DDB1- and CUL4-associated factor 13	DCAF13
25.9607	26.3661	NaN	NaN	26.1564	26.2108	26.7988	26.3125	26.3819	3	28.9	23.066	605940000	5	A0A087WT30;Q8N5I9;J3KN91	A0A087WT30;Q8N5I9	Uncharacterized protein C12orf45	C12orf45
29.9585	29.8875	30.0154	30.047	29.8421	29.9704	29.9956	30.0744	29.8852	8	34.8	36.014	8823400000	66	Q6IBP2;Q6FHB5;B3KSE0;A0A087WT44;P30519;I3L159;I3L1F5;Q53HF1;I3L276;I3L4P8;A0A1B0GXH0;I3L463;I3L1Y2	Q6IBP2;Q6FHB5;B3KSE0;A0A087WT44;P30519;I3L159;I3L1F5;Q53HF1	Heme oxygenase 2	HMOX2
28.3316	27.8734	28.1475	28.3131	28.2336	28.4287	27.956	28.0618	28.0205	14	24.4	90.856	2511300000	53	A0A087WT45;A8K7Z3;Q4V328;A0A075B793;A0A087WXA6;A0A087WW92;A0A087WZF5	A0A087WT45;A8K7Z3;Q4V328;A0A075B793	GRIP1-associated protein 1	GRIPAP1
27.5391	27.6476	27.8078	27.442	27.4032	27.9507	27.6475	27.6079	27.7372	4	7.5	128.07	1768500000	17	A0A087WT53;Q96QZ7;A0A087WXD2;H7C5T8;H7C4U7;H7C535;V9P4H4	A0A087WT53;Q96QZ7;A0A087WXD2;H7C5T8;H7C4U7;H7C535;V9P4H4	Membrane-associated guanylate kinase, WW and PDZ domain-containing protein 1	MAGI1
27.7735	28.0148	28.0777	27.9847	28.2742	28.1094	28.1586	27.665	27.9823	5	15	23.563	2258900000	29	Q7LD69;Q9H3K5;A0A087WXF6;A0A087WTI3;O75251;B7Z4P1;Q6ZQU6;F5H5N1;B7Z1U1;A8K0V6;Q8NAS7;F5GXJ1;Q6ZS38	Q7LD69;Q9H3K5;A0A087WXF6;A0A087WTI3;O75251;B7Z4P1;Q6ZQU6;F5H5N1;B7Z1U1;A8K0V6;Q8NAS7;F5GXJ1	NADH dehydrogenase [ubiquinone] iron-sulfur protein 7, mitochondrial	NDUFS7
25.9855	NaN	26.2239	26.1245	25.894	NaN	NaN	26.0752	26.1773	3	28	14.767	527980000	5	A0A096LNJ4;A0A087WX43;D6RE84;A0A087WTT9;A0A1B0GVW6;Q9NP73;A0A096LP10;A0A096LNL2	A0A096LNJ4;A0A087WX43;D6RE84;A0A087WTT9;A0A1B0GVW6;Q9NP73;A0A096LP10	Putative bifunctional UDP-N-acetylglucosamine transferase and deubiquitinase ALG13	ALG13
29.7403	29.5827	29.4967	29.3476	29.6227	29.5654	29.6078	29.7472	29.6828	18	28.2	91.099	6852000000	100	A0A087WVR3;A0A087WTW0;Q96T88;B4E0F9;A0A087WWG9	A0A087WVR3;A0A087WTW0;Q96T88;B4E0F9;A0A087WWG9	E3 ubiquitin-protein ligase UHRF1	UHRF1
NaN	NaN	NaN	NaN	25.094	NaN	NaN	NaN	NaN	2	1.6	221.36	56469000	2	A0A087WTW5;A7E2C0;Q9UKL3	A0A087WTW5;A7E2C0;Q9UKL3	CASP8-associated protein 2	CASP8AP2
26.0079	27.6346	26.5776	27.1339	27.4533	26.1185	25.379	25.9464	26.1184	5	10.8	65.254	882720000	19	B7Z942;A0A087WU05;A0A087WY48;Q8IY22	B7Z942;A0A087WU05;A0A087WY48;Q8IY22	C-Maf-inducing protein	CMIP
27.3288	27.1015	27.2859	27.2742	27.4	27.4185	27.297	27.1838	27.4455	4	34.2	8.8403	1391100000	24	A0A087WU28;A0A0B4J2C1;Q4U2R6;M0R176	A0A087WU28;A0A0B4J2C1;Q4U2R6;M0R176	39S ribosomal protein L51, mitochondrial	MRPL51
27.2683	26.8385	27.4597	26.9179	26.9691	27.1541	27.258	27.4715	27.5575	3	17.7	32.921	1330200000	19	A0A0A0MST1;A0A087WU46;Q13422;A0A0A0MRA0;R9R4D9;Q8TDG7	A0A0A0MST1;A0A087WU46;Q13422;A0A0A0MRA0;R9R4D9	DNA-binding protein Ikaros	IKZF1
NaN	NaN	NaN	NaN	NaN	NaN	NaN	27.455	NaN	2	5.7	41.459	1244800000	4	B4DH58;A0A087WU53;Q9H0U3;A8MUP5;Q96SP2	B4DH58;A0A087WU53;Q9H0U3;A8MUP5;Q96SP2	Magnesium transporter protein 1	MAGT1
NaN	NaN	NaN	26.1432	NaN	NaN	NaN	25.6084	NaN	3	6.4	85.075	464280000	6	E7ER32;A4FUJ8;A0A087X287;B0QY83;A0A087WU73;W0Z7M9;Q969V6	E7ER32;A4FUJ8;A0A087X287;B0QY83;A0A087WU73;W0Z7M9;Q969V6	MKL/myocardin-like protein 1	MKL1;mkl1
30.0466	30.0539	30.0312	30.135	30.0897	30.1435	30.2666	30.2371	30.3131	19	32.4	65.702	10024000000	110	A0A087WUB9;Q8WYA6;A2A2P1	A0A087WUB9;Q8WYA6	Beta-catenin-like protein 1	CTNNBL1
30.4839	29.6244	29.289	29.1997	29.2231	29.7251	29.7399	29.1584	29.6217	5	35	17.027	6918900000	17	E9PL01;B4DDB9;A0A087WUC6;E9PI68;Q15005;E9PRB9;H0YE04	E9PL01;B4DDB9;A0A087WUC6;E9PI68;Q15005;E9PRB9	Signal peptidase complex subunit 2	SPCS2
26.2488	26.6703	26.5071	26.4249	26.3607	26.3865	26.3533	25.7386	26.2427	5	17.5	40.428	699730000	23	A0A087WUD1;Q6DD87	A0A087WUD1;Q6DD87	Zinc finger protein 787	ZNF787
26.7556	NaN	26.5916	NaN	NaN	NaN	25.6949	NaN	NaN	2	40	12.217	310840000	9	A0A087WUD6;A0A158RFV5;Q13068;P0CL82;P0CL81;P0CL80;O76087;Q13065	A0A087WUD6;A0A158RFV5;Q13068;P0CL82;P0CL81;P0CL80;O76087;Q13065	G antigen 4;G antigen 12I;G antigen 12G;G antigen 12F;G antigen 7;G antigen 1	GAGE2E;GAGE4;GAGE12I;GAGE12G;GAGE12F;GAGE7;GAGE1
24.133	NaN	24.5083	24.2034	24.6092	24.2934	24.3264	24.5724	NaN	2	6	49.683	149700000	8	Q05DN0;Q4G0R1;A0A087WUI6;Q8WXW3	Q05DN0;Q4G0R1;A0A087WUI6;Q8WXW3	Progesterone-induced-blocking factor 1	PIBF1
NaN	NaN	NaN	NaN	NaN	NaN	NaN	NaN	26.0968	2	54.1	8.8257	489430000	2	A0A087WUN5;C5H3H2;Q96DE5	A0A087WUN5;C5H3H2;Q96DE5	Anaphase-promoting complex subunit 16	ANAPC16;C10orf104
31.6921	31.5482	31.7285	31.6825	31.5296	31.4715	31.7039	31.6209	31.395	9	64.1	10.353	27418000000	86	A0A087WUN7;H0YJ40;G3V4X6;G3V2S9;Q9GZT3;H0YJW7;H0YJI1;H0YJ07;H0YJU7	A0A087WUN7;H0YJ40;G3V4X6;G3V2S9;Q9GZT3;H0YJW7	SRA stem-loop-interacting RNA-binding protein, mitochondrial	SLIRP
31.967	32.4818	32.1305	32.2045	32.2843	32.3165	32.4373	32.5263	32.2848	6	36.6	15.197	44279000000	54	E7ETK0;A0A087WUS0;P62847	E7ETK0;A0A087WUS0;P62847	40S ribosomal protein S24	RPS24
32.563	32.5691	32.5601	32.5592	32.5784	32.6312	32.7902	32.7976	32.6914	35	33	138.8	56087000000	290	Q8N5A0;A0A087WUT6;O60841;D3DVI5;B3KM86;A0JLR8;Q05CQ1	Q8N5A0;A0A087WUT6;O60841;D3DVI5;B3KM86	Eukaryotic translation initiation factor 5B	EIF5B
24.9208	24.887	24.8496	24.8867	NaN	24.9083	NaN	25.091	NaN	4	7.5	76.92	238110000	8	A0A087WUV9;Q9NV66;B4DW16	A0A087WUV9;Q9NV66	S-adenosyl-L-methionine-dependent tRNA 4-demethylwyosine synthase	TYW1
28.8117	28.6415	28.5662	28.6215	28.3227	28.7939	28.7435	28.7003	28.6413	11	34.3	47.256	3563600000	43	A0A087X0G7;A0A087WUW6;A0A087X1B1;Q9Y6K9;C9JN51;D3DWY0;C9JH59;D3DWY2;A0A087WV30;C9JCG6;A0A087X1K7	A0A087X0G7;A0A087WUW6;A0A087X1B1;Q9Y6K9;C9JN51;D3DWY0	NF-kappa-B essential modulator	IKBKG
26.9888	27.1313	27.359	27.6075	27.4676	27.455	27.1555	27.1482	27.3204	5	37.7	22.804	1379600000	19	A8K4C1;A0A087WUW9;Q9NXU5;A0A0B4J222	A8K4C1;A0A087WUW9;Q9NXU5;A0A0B4J222	ADP-ribosylation factor-like protein 15	ARL15
28.3855	28.1377	28.4247	28.4384	28.3369	28.478	28.3595	28.2242	28.2229	5	31.9	28.761	2844700000	27	A0A087WUX8;A0A087WYF7;Q6UXV4;Q68DW4	A0A087WUX8;A0A087WYF7;Q6UXV4;Q68DW4	MICOS complex subunit MIC27	APOOL;DKFZp779P1227
28.1674	28.0535	28.0705	27.9271	28.0109	27.9701	28.231	28.1663	28.0269	4	23.6	38.099	2377400000	11	A0A087WV25;B4DH64;O95684	A0A087WV25;B4DH64;O95684	FGFR1 oncogene partner	FGFR1OP
24.8881	25.3976	25.7426	25.1728	26.2079	26.412	26.8656	26.7178	26.8764	2	13.2	26.959	644450000	18	B4DR65;Q2TAB4;A0A087WV69;A2I2N5;A6H8X0;P56645	B4DR65;Q2TAB4;A0A087WV69;A2I2N5;A6H8X0;P56645	Period circadian protein homolog 3	PER3
28.1678	27.6481	27.0754	27.3781	27.3116	27.5914	28.0829	27.5082	27.6269	5	16.5	46.382	1724000000	30	A0A087WV97;Q8WU79;X6RCC3;B7Z2F9	A0A087WV97;Q8WU79;X6RCC3	Stromal membrane-associated protein 2	SMAP2
24.1272	NaN	NaN	24.7524	NaN	NaN	24.3492	NaN	NaN	2	5.4	65.374	141350000	4	Q9NWL7;J3KRZ8;B3KR82;A0A087WVA8;Q8IWB9;Q9NZ39;Q9NX99;Q7L166;Q7Z2T6;Q2YDX6	Q9NWL7;J3KRZ8;B3KR82;A0A087WVA8;Q8IWB9;Q9NZ39;Q9NX99;Q7L166;Q7Z2T6;Q2YDX6	Testis-expressed sequence 2 protein	TEX2;MST069
27.1938	NaN	27.3861	26.8999	27.784	27.4122	27.0886	27.0944	26.8044	7	6.1	190.36	1305600000	12	A6H8W8;A0A087WVF7;Q9NZM3;Q53TK4;Q6PJ79;E7EPJ2;Q8IWI5;Q53TM3;F8W719	A6H8W8;A0A087WVF7;Q9NZM3;Q53TK4;Q6PJ79;E7EPJ2;Q8IWI5	Intersectin-2	ITSN2
25.0859	NaN	25.3572	25.3782	NaN	25.1482	25.155	NaN	NaN	3	4.4	99.283	249720000	5	B3KUY5;A0A087WVI0;E9PBL8;Q8WTW3;Q4G0L8;J3KSY3;J3QKY9;J3QLT5	B3KUY5;A0A087WVI0;E9PBL8;Q8WTW3;Q4G0L8	Conserved oligomeric Golgi complex subunit 1	COG1
34.8409	34.665	34.7497	34.8896	34.6148	34.6009	34.6468	34.6076	34.6624	82	49.9	192.06	234420000000	848	A0A087WVQ6;Q00610;J3KS13;A0A087WX41;P53675;J3KSQ2;K7EJJ5;J3QL20;J3KRF5;A4FU99;Q9H3B0;F5H5N6	A0A087WVQ6;Q00610	Clathrin heavy chain;Clathrin heavy chain 1	CLTC
NaN	26.0141	26.1969	26.2321	26.2833	26.1843	NaN	26.0127	NaN	3	16.3	19.497	564540000	5	B4DKJ9;A0A087WVS8;Q70IA6;B4DTJ1	B4DKJ9;A0A087WVS8;Q70IA6	MOB kinase activator 2	MOB2
27.8601	28.2102	28.1492	27.9528	27.7997	28.0811	28.0518	28.4182	28.2405	4	18.6	37.772	2404700000	16	A0A087WVT6;Q9BWW4;A1L192;D6RAC5;B7Z4K7;A0A087X159;P81877;U3KQ46;A0A024R7K9;Q9BWG4;Q9BT57;Q9NW25	A0A087WVT6;Q9BWW4;A1L192;D6RAC5;B7Z4K7;A0A087X159;P81877;U3KQ46;A0A024R7K9;Q9BWG4	Single-stranded DNA-binding protein 3;Single-stranded DNA-binding protein 2;Single-stranded DNA-binding protein 4	SSBP3;SSBP2;SSBP4
29.0913	29.2273	29.3913	29.4766	29.4698	29.697	29.3985	29.4124	29.445	20	28.9	102.82	5994300000	72	A1A5C4;A0A087WVV2;A0A0A0MRV0;A7BI36;Q9P2E9;F8W7S5;A1A5C5;B3KSG1;A0A087WU26	A1A5C4;A0A087WVV2;A0A0A0MRV0;A7BI36;Q9P2E9;F8W7S5;A1A5C5	Ribosome-binding protein 1	RRBP1
28.5259	28.5469	28.66	28.7151	28.6898	28.7572	28.762	28.6823	28.6471	17	22.6	121.02	3587300000	62	H7C4X9;A0A087WVZ6;A0A087WYS3;A0A087WV57;Q5JV90;A6H8Y8;Q2HXV5;Q5TH12	H7C4X9;A0A087WVZ6;A0A087WYS3;A0A087WV57;Q5JV90;A6H8Y8		ZMYND8;DKFZp564P1772
28.8759	28.6869	28.9393	28.8442	28.8668	29.049	29.2044	29.0388	29.1041	3	19	21.459	4393600000	17	A0A087WVZ9;A0A0A0MQR7;E5KT65;P19388;B4DJ89;A0A087WWX0;K7EQN2;K7EJ87;A0A087WVN5	A0A087WVZ9;A0A0A0MQR7;E5KT65;P19388;B4DJ89;A0A087WWX0	DNA-directed RNA polymerases I, II, and III subunit RPABC1	POLR2E
29.8379	29.8923	29.7022	29.6792	29.5429	29.7044	29.5378	29.6056	29.4773	7	27.7	40.796	7190700000	46	A0A140VJU5;A0A087WW40;Q9Y371	A0A140VJU5;A0A087WW40;Q9Y371	Endophilin-B1	SH3GLB1
28.2658	27.7628	28.4386	28.2993	28.0517	28.2016	27.924	27.8733	28.0935	6	12.1	78.287	2432300000	27	A0A087WW65;A0A0S2Z2Z3;O75027;B4DGL8;B3KM98;A0A0S2Z367;A0A0S2Z2W5	A0A087WW65;A0A0S2Z2Z3;O75027;B4DGL8;B3KM98;A0A0S2Z367	ATP-binding cassette sub-family B member 7, mitochondrial	ABCB7
26.6296	NaN	26.6716	25.9664	NaN	26.9696	26.7223	26.7671	26.7119	2	2.3	156.08	967800000	12	J3JSM9;A0A087WW76;Q5T5U3;H0Y468;A0A1B0GTZ9;B7Z3A3;A0A1B0GV73	J3JSM9;A0A087WW76;Q5T5U3;H0Y468;A0A1B0GTZ9;B7Z3A3;A0A1B0GV73	Rho GTPase-activating protein 21	ARHGAP21
27.0465	27.4984	27.2728	27.6914	27.2028	27.8388	27.9249	28.1362	28.0067	6	23.4	47.171	1791400000	20	B4DP28;F8W8R3;A0A087WWF6;P49005;C9IZD2;C9J8Z7;C9JLE1;C9JHC7;H7C1B3	B4DP28;F8W8R3;A0A087WWF6;P49005;C9IZD2;C9J8Z7;C9JLE1;C9JHC7	DNA polymerase delta subunit 2	POLD2
NaN	NaN	NaN	NaN	NaN	NaN	NaN	NaN	25.5239	2	17.7	23.075	252920000	4	A0A087WZ78;A0A087WWJ9;D6REL5;Q6UWZ7	A0A087WZ78;A0A087WWJ9;D6REL5;Q6UWZ7	BRCA1-A complex subunit Abraxas	FAM175A
26.3272	26.604	26.5478	26.4924	26.4294	26.4006	26.6529	26.8118	26.5186	10	13.4	91.997	820700000	23	A0A0C4DGT3;B4DGC5;A0A087WWK8;Q6DN90	A0A0C4DGT3;B4DGC5;A0A087WWK8;Q6DN90	IQ motif and SEC7 domain-containing protein 1	IQSEC1
26.4435	26.7806	26.5571	26.8064	26.9306	26.6225	26.4074	26.5682	26.6525	5	17.5	33.921	878130000	21	H0YMB3;A0A087WWM4;F8WAN9;Q7Z527;Q6PKC0;Q9P2T1;H0YLV5;H0YNJ6;H0YK13;H0YK71;Q86SZ5;H0YN22;H0YMW6;H0YMR9;H0YMV5;H0YNH0;H0YL68;A0A0B4J281;H0YMG3;H0YNS9;H0YLB8	H0YMB3;A0A087WWM4;F8WAN9;Q7Z527;Q6PKC0;Q9P2T1;H0YLV5;H0YNJ6;H0YK13;H0YK71;Q86SZ5	GMP reductase;GMP reductase 2	GMPR2
29.4291	29.5237	29.6305	29.5498	29.4982	29.5869	29.4792	29.6343	29.579	18	23.2	102.13	6565100000	78	A0A087WWP4;Q96T37;Q59EY1;Q0VA89;Q13722	A0A087WWP4;Q96T37	Putative RNA-binding protein 15	RBM15
26.1963	26.6345	26.369	26.6174	26.4805	26.4086	26.7102	26.5139	26.2136	4	12.1	77.319	782100000	19	A0A0C4DGT8;A0A087WWP8;Q5VWQ0;A0A0C4DH79	A0A0C4DGT8;A0A087WWP8;Q5VWQ0	Round spermatid basic protein 1	RSBN1
28.2554	28.1119	28.1878	28.3828	28.1135	28.168	28.5847	28.7497	28.5146	8	59.9	23.79	2897300000	45	V9GYP5;B4DQC7;A0A087WWQ2;A8K6D2;Q92979;B4DP65;A0A087WVM7;A0A0U3B3H7	V9GYP5;B4DQC7;A0A087WWQ2;A8K6D2;Q92979;B4DP65;A0A087WVM7	Ribosomal RNA small subunit methyltransferase NEP1	EMG1
30.3319	30.3013	30.3724	30.3287	30.2359	30.3151	30.3674	30.3722	30.4598	18	39.1	75.651	11442000000	143	A0A087WWS1;Q96FV9;R4GMN4;J3KT14;A0A087WY84;J3KRD7;J3QQZ3	A0A087WWS1;Q96FV9	THO complex subunit 1	THOC1
33.7358	33.9378	34.0394	34.1095	34.2046	34.2609	34.0155	34.067	34.0477	23	72.7	26.42	149810000000	201	A0A087WWU8;A0A0S2Z4G4;Q5HYB6;B2RDE1;A0A0S2Z4I4;Q5VU61;B4DWT5;J3KN67;Q8NAG3;M1VPF4;D6R904;B4DQ80;K7EP68;K7ERG3;D6RFM2;H0YL80;H0YKP3;H0YNC7;H0YL52;D9YZV4;A0A0S2Z4G6;A0A024R5W6;Q6ZN40;P09493;Q6LDX7;C9IZA2;B4DTK3;Q8NI98;A0A024R4K5	A0A087WWU8;A0A0S2Z4G4;Q5HYB6;B2RDE1;A0A0S2Z4I4;Q5VU61;B4DWT5;J3KN67;Q8NAG3;M1VPF4;D6R904	Tyrosine-protein kinase receptor	TPM3;DKFZp686J1372;TPM3-ROS1
25.5555	26.8075	26.5713	26.1698	27.5852	26.7353	26.4541	26.7821	26.2531	6	46.8	18.073	869630000	19	A0A087WWW9;A2TDT2;O95999	A0A087WWW9;A2TDT2;O95999	B-cell lymphoma/leukemia 10	BCL10
NaN	26.2759	26.5378	26.6102	26.5005	26.469	26.3181	26.4263	NaN	5	19.9	47.741	655920000	10	R9WPL0;A0A087WXI3;Q59GC1;R9WQY1;A8MQB8;G3V0J0;X5D907;A0A087WY29;A0A0K0MJ24;Q8IXW7;A0A087WWR6;B4DFH8;B4DZ17	R9WPL0;A0A087WXI3;Q59GC1;R9WQY1;A8MQB8;G3V0J0;X5D907;A0A087WY29;A0A0K0MJ24;Q8IXW7		FMR1
24.5389	24.8158	24.9859	24.5094	NaN	NaN	NaN	NaN	NaN	4	10.7	67.664	116390000	9	A0A087WXK8;Q9H4H8	A0A087WXK8;Q9H4H8	Protein FAM83D	FAM83D
28.3629	28.5043	28.4718	28.5613	28.5994	28.6517	28.514	28.3634	28.5872	14	21	107.64	3209100000	53	Q658K0;A0A087WXL6;Q9H270;B7Z879;Q53FX3;B3KPS8;A0A087X2J4;A0A0G2JS92	Q658K0;A0A087WXL6;Q9H270;B7Z879;Q53FX3;B3KPS8	Vacuolar protein sorting-associated protein 11 homolog	DKFZp564P2364;VPS11
25.7696	NaN	NaN	NaN	NaN	NaN	NaN	NaN	NaN	3	17.1	24.064	272780000	9	Q5SZ82;A0A087WXU0;Q9NWS8;Q9H5X7	Q5SZ82;A0A087WXU0;Q9NWS8;Q9H5X7	Required for meiotic nuclear division protein 1 homolog	RMND1
29.082	29.0865	29.296	29.258	28.92	29.1424	29.0814	29.1753	29.1052	10	28.2	64.521	4958200000	69	B4DPX9;A0A087WY31;Q8NA80;A0A024R7W5;A0A087X0Q1;Q7Z739;Q658Z6;Q96MZ5;Q8N3V9;A0A087WU40;A0A087X0U5	B4DPX9;A0A087WY31;Q8NA80;A0A024R7W5;A0A087X0Q1;Q7Z739;Q658Z6;Q96MZ5;Q8N3V9	YTH domain-containing family protein 3	YTHDF3;DKFZp451J085;DKFZp451A052
29.3295	29.3014	29.4199	29.4772	29.4309	29.6879	29.7196	29.5291	29.7014	5	22.5	31.102	6437500000	55	A0A087WY55;Q9NP79;Q9C063;Q5TGM0	A0A087WY55;Q9NP79;Q9C063;Q5TGM0	Vacuolar protein sorting-associated protein VTA1 homolog	VTA1
30.4314	30.4045	30.3566	30.4153	30.2639	30.1353	30.2364	30.3642	30.3477	15	39.9	49.526	11327000000	61	A0A087WY71;Q96CW1;E9PFW3;B4DNB9;B4DFM1;B4E304;B4DJB1;C9JJ47;B4DTI4;B7Z4N2;C9JJD3;C9JGT8;C9JPV8;C9JTK4;H7C4C3	A0A087WY71;Q96CW1;E9PFW3;B4DNB9;B4DFM1;B4E304;B4DJB1;C9JJ47;B4DTI4;B7Z4N2	AP-2 complex subunit mu	AP2M1
25.2404	25.3111	25.0962	25.3924	25.2497	25.2577	25.2731	25.0671	25.1811	3	15.9	28.423	331000000	14	A8K3N2;G3V4A5;A0A087WYL7;O75586;B4DTY4	A8K3N2;G3V4A5;A0A087WYL7;O75586	Mediator of RNA polymerase II transcription subunit 6	MED6
29.3897	29.3623	29.311	29.2948	29.6129	29.6169	29.5545	29.739	29.5571	19	21.1	155.29	6350900000	70	A0A087WYN9;Q7Z478;H0Y8L1	A0A087WYN9;Q7Z478	ATP-dependent RNA helicase DHX29	DHX29
28.243	28.5801	28.7048	28.6057	28.6836	29.0089	28.7491	28.8487	29.0007	5	50	13.654	3695500000	32	A0A087WYR0;P09132;A0A087WWU9;D6RBG4	A0A087WYR0;P09132;A0A087WWU9	Signal recognition particle 19 kDa protein	SRP19
24.9875	23.9609	25.6708	24.445	NaN	NaN	NaN	24.4143	25.1006	2	26.2	11.138	207810000	7	H3BS73;H3BRT2;H3BNB2;A0A087WYU2;Q96S19;H3BQ55;H3BNT3;H3BMF3	H3BS73;H3BRT2;H3BNB2;A0A087WYU2;Q96S19;H3BQ55;H3BNT3;H3BMF3	UPF0585 protein C16orf13	C16orf13
31.2815	31.0766	31.1788	31.0314	31.0173	31.1615	31.1357	31.2427	31.1622	18	38.8	77.843	19967000000	146	A0A087WZ13;E9PAU2;Q8IY67;K7EQG2;K7EKR9	A0A087WZ13;E9PAU2;Q8IY67	Ribonucleoprotein PTB-binding 1	RAVER1
NaN	NaN	NaN	NaN	NaN	NaN	NaN	NaN	25.1914	3	4.3	109.25	230620000	2	X2JEV0;A0A087WZ30;O94761;V9GZ64;A0A087X072;V9GYB6	X2JEV0;A0A087WZ30;O94761;V9GZ64;A0A087X072	ATP-dependent DNA helicase Q4	RECQL4
25.906	NaN	25.9931	26.3071	26.1602	26.3175	26.6818	26.0659	26.5308	3	31.4	24.198	629920000	10	H0YCW6;B4DQI3;B4DYW0;A0A087WZ62;Q9H6U8	H0YCW6;B4DQI3;B4DYW0;A0A087WZ62;Q9H6U8	Alpha-1,2-mannosyltransferase ALG9	ALG9
NaN	NaN	NaN	NaN	NaN	NaN	NaN	NaN	23.5284	3	44.5	13.322	613280000	4	A0A087WZA6;A8K2G0;O15126;A0A087WTX8;B4DP10;B4E2V7;A0A087WXB0	A0A087WZA6;A8K2G0;O15126;A0A087WTX8;B4DP10;B4E2V7;A0A087WXB0	Secretory carrier-associated membrane protein 1	SCAMP1
23.4148	NaN	23.6866	24.0288	24.0425	23.787	23.6739	23.6961	NaN	4	6.5	91.296	102790000	11	M0QZS0;D6W646;A0A087WZG4;Q6ZSZ5	M0QZS0;D6W646;A0A087WZG4;Q6ZSZ5	Rho guanine nucleotide exchange factor 18	ARHGEF18;hCG_22253
31.4566	31.4971	31.4897	31.2611	31.0387	31.3726	30.9809	31.005	31.1797	12	45.5	29.114	21675000000	99	D6RHI9;A0A087WZM2;A6XND5;O00584;D6REQ6;H0YAE9;A0A087WWI1;Q8TCU1;J3QQ64	D6RHI9;A0A087WZM2;A6XND5;O00584;D6REQ6;H0YAE9	Ribonuclease T2	RNASET2
30.3621	30.5751	30.4574	30.5824	30.566	30.6907	30.8065	30.6865	30.751	14	43.4	42.41	13751000000	75	A0A087WZN1;O43837;A0A087X2E5;L0R875;A0A0D9SG66;Q9UIC5;B4DU38;Q99855	A0A087WZN1;O43837;A0A087X2E5;L0R875	Isocitrate dehydrogenase [NAD] subunit, mitochondrial;Isocitrate dehydrogenase [NAD] subunit beta, mitochondrial	IDH3B
28.8984	28.7717	28.6053	28.7551	28.3513	28.7316	28.3236	28.4042	28.2115	19	20.9	144.36	3351300000	47	A0A087WZV0;O43314;B4DGV1;D6RBU4;H0Y9M0;D6RFG4;A0A087WWN8;F8W9A8;B7WPL9;Q6PFW1;H7C436	A0A087WZV0;O43314;B4DGV1;D6RBU4	Inositol hexakisphosphate and diphosphoinositol-pentakisphosphate kinase 2	PPIP5K2
30.9676	31.2671	31.1443	31.1661	31.1459	31.3214	31.0961	31.2815	31.2548	14	44.4	28.763	20397000000	102	A0A0S2Z5I7;A0A087X020;Q9Y3A5;F8WE72;A0A0S2Z5F7	A0A0S2Z5I7;A0A087X020;Q9Y3A5	Ribosome maturation protein SBDS	SBDS
33.1539	33.2123	33.1832	33.4696	33.4943	33.5362	33.0335	32.9184	33.1249	32	51.1	104.78	85071000000	262	A0A087X054;Q9Y4L1;B7Z2N4;B3KXH0;B7Z766;B7Z602;E9PJ21;Q05D91;A0A087WWI4;Q6IN67;K7EQK2;A0A024R3G0;J3KTF1;J3QL06;Q9BST8;J3QQH7;J3QLE9;B7Z4E6;A0A087X214;A0A087WW13;Q68D25	A0A087X054;Q9Y4L1;B7Z2N4;B3KXH0;B7Z766;B7Z602;E9PJ21;Q05D91;A0A087WWI4;Q6IN67;K7EQK2	Hypoxia up-regulated protein 1	HYOU1
NaN	24.447	24.545	24.4598	24.5548	24.105	23.7984	24.3531	NaN	3	18.5	24.907	148160000	14	U3KPT7;A0A087X0B7;H7C3C7;A0A0K0K1I8;Q5SQN1;A0A087X2J6;H0Y627	U3KPT7;A0A087X0B7;H7C3C7;A0A0K0K1I8;Q5SQN1;A0A087X2J6;H0Y627	Synaptosomal-associated protein 47	SNAP47
27.4816	27.8392	27.8202	27.6583	27.9313	27.7412	27.9773	27.8165	27.9522	11	12.2	113.79	1985000000	51	A0A087X0H9;Q5T8P6;B4DZH7;E2PSN0	A0A087X0H9;Q5T8P6	RNA-binding protein 26	RBM26
26.0645	26.055	26.3155	26.6603	26.6113	26.6895	26.6967	26.4155	26.4675	8	13.4	77.969	776510000	18	A0A087X0I9;Q04759	A0A087X0I9;Q04759	Protein kinase C;Protein kinase C theta type	PRKCQ
NaN	NaN	NaN	NaN	NaN	25.125	NaN	NaN	NaN	2	1.7	140.06	216570000	3	A0A087X0K0;P39059;B3KTP7	A0A087X0K0;P39059;B3KTP7	Collagen alpha-1(XV) chain;Restin;Restin-2;Restin-3;Restin-4	COL15A1
28.6347	28.729	28.7823	28.6979	28.7964	28.9548	29.0685	29.0428	28.8745	11	18.7	82.89	4074500000	41	A0A087X0M4;Q9BWU0;B4DV74;A0A087WWF4;H7C256	A0A087X0M4;Q9BWU0;B4DV74	Kanadaptin	SLC4A1AP
26.494	26.4577	26.8519	26.738	27.151	27.1466	27.5604	27.5969	27.5002	9	4.8	312.1	1211300000	25	A0A087X0P0;Q02224;D6RBW0;D6RHK2	A0A087X0P0;Q02224	Kinesin-like protein;Centromere-associated protein E	CENPE
NaN	NaN	NaN	NaN	NaN	NaN	NaN	25.9458	NaN	3	4.5	109.11	350950000	3	H0Y6I7;Q86TD1;B4E0L8;H0Y5J3;F5H5V6;E1U0S6;F5H6S1;E1U0S7;B7ZKN6;F8W8R6;Q59HG3;B7ZKN1;A0A087X0R0;B7ZKN5;O15550;F4MHJ0;F4MHB2;F4MHI0;F4MHI3;B4E253;B4DG81;F4MH57;F4MH98;F4MHH8;F4MH66;F4MH61;F4MHH5;F4MHE7;F4MHR8;F4MHD9;F4MHH6;E1NZ93;F4MH65;F4MH75;F4MH36;F4MH31;F4MH39;F4MH64;F4MH29;F4MH91;A0A087X248;F4MHA0;F4MH27;F4MH42;F4MH63;F4MH53;F4MH60;F4MHK3;F4MH46;E1U1M9;F4MH52;F4MH32;F4MH30;A0A096LPD8;F4MHC1;E1…	H0Y6I7;Q86TD1;B4E0L8;H0Y5J3;F5H5V6;E1U0S6;F5H6S1;E1U0S7;B7ZKN6;F8W8R6;Q59HG3;B7ZKN1;A0A087X0R0;B7ZKN5;O15550;F4MHJ0;F4MHB2;F4MHI0;F4MHI3;B4E253;B4DG81;F4MH57;F4MH98;F4MHH8;F4MH66;F4MH61;F4MHH5;F4MHE7;F4MHR8;F4MHD9;F4MHH6;E1NZ93;F4MH65;F4MH75;F4MH36;F4MH31;F4MH39;F4MH64;F4MH29;F4MH91;A0A087X248;F4MHA0;F4MH27;F4MH42;F4MH63;F4MH53;F4MH60;F4MHK3;F4MH46;E1U1M9;F4MH52;F4MH32;F4MH30;A0A096LPD8;F4MHC1;E1…	Lysine-specific demethylase 6A;Histone demethylase UTY	KDM6A;DKFZp451J023;UTX;UTY
27.8849	27.9334	28.7427	28.2964	27.7447	27.6557	27.3433	27.583	27.6111	6	35.8	18.884	2130800000	17	Q3SYF1;A0A087X0R6;Q9UMY4	Q3SYF1;A0A087X0R6;Q9UMY4	Sorting nexin-12	SNX12
27.919	27.7704	27.3829	27.9058	27.8346	27.799	27.4921	27.411	27.6135	5	21.8	42.868	1811900000	29	Q2TAM5;E9PKH5;B4E082;A0A087X0W8;Q04206;E9PI38;E9PQS6;Q96F54;E9PKV4;Q96CP1;A0A087WVP0;E9PJR1;E9PRX2;E9PNV4;E9PMD5	Q2TAM5;E9PKH5;B4E082;A0A087X0W8;Q04206;E9PI38;E9PQS6;Q96F54;E9PKV4;Q96CP1;A0A087WVP0	Transcription factor p65	RELA
28.2537	28.2835	28.6327	28.1087	28.4408	29.0318	28.6107	28.4959	28.9881	7	29.4	37.325	3348800000	26	A0A087X0W9;Q8N6M0;A0A0C4DH76	A0A087X0W9;Q8N6M0	OTU domain-containing protein 6B	OTUD6B
NaN	26.2135	26.0264	26.4683	25.9333	NaN	26.8673	26.5869	26.5668	2	8.5	42.619	653050000	8	A0A087X0Z7;H0YJ66;Q9Y394;H0YJE4;H0YJR8;Q659E8	A0A087X0Z7;H0YJ66;Q9Y394;H0YJE4;H0YJR8;Q659E8	Dehydrogenase/reductase SDR family member 7	DHRS7;DKFZp564H1664
29.5941	28.9623	28.6861	28.424	29.9214	NaN	27.2537	28.2939	28.2521	4	37.6	12.957	3844900000	22	A0A087X111;Q9UEU5;Q6NT46;Q4V326;Q13066	A0A087X111;Q9UEU5;Q6NT46;Q4V326;Q13066	G antigen 2D;G antigen 2A;G antigen 2E;G antigen 2B/2C	GAGE13;GAGE2D;GAGE2A;GAGE2E;GAGE2B
29.5512	29.7894	29.809	29.683	29.832	29.8987	29.8664	29.9221	29.8196	7	38.5	49.355	7810300000	75	A0A087X142;B7ZVZ1;A6NMH6;A6NFQ9;F8W8I8;Q92599;C9JV02;A0A0A0MRP8;C9J4G8	A0A087X142;B7ZVZ1;A6NMH6;A6NFQ9;F8W8I8;Q92599	Septin-8	2008-09-01
26.7877	26.5129	26.9448	26.6101	26.7686	26.7348	26.793	27.1824	26.7971	4	7.8	63.401	980500000	18	B3KV88;A0A087X169;Q5T6S3;X6RER8;B0QZ72;F5H8K3;B7Z887;B7Z8H3	B3KV88;A0A087X169;Q5T6S3;X6RER8;B0QZ72;F5H8K3;B7Z887;B7Z8H3	PHD finger protein 19	PHF19
30.3991	30.5476	30.4126	30.4112	30.2352	30.4492	30.5205	30.706	30.5114	16	41.8	54.945	12517000000	96	A0A087X1A5;A8K622;Q59F99;O95793;Q5JW30;B3KRE0;B4DPJ9	A0A087X1A5;A8K622;Q59F99;O95793;Q5JW30;B3KRE0	Double-stranded RNA-binding protein Staufen homolog 1	STAU1
NaN	NaN	NaN	NaN	26.1133	NaN	NaN	NaN	NaN	3	15.4	30.013	550110000	2	G3V328;D3VVT1;D3VVN9;D3VVK3;D3VVS3;D3VVB6;D3VVJ6;D3VVF7;D3VVK1;D3VVB2;D3VVG1;D3VVE5;D3VVE3;C9JQV6;D3VVH9;D3VVE0;D3VVC2;D3VVM5;D3VVE6;D3VVN4;D3VVS7;D3VVJ4;D3VVC7;D3VVC4;A0A087X1A8;D3VVG9;D3VVJ1;G3V3R7;D3VVN7;D3VVM7;D3VVM3;D3VVL0;D3VVI3;D3VVF0;D3VVF3;D3VVS0;D3VVI8;D3VVT5;D3VVJ2;D3VVI9;D3VVH8;D3VVH2;D3VVG7;D3VVT6;D3VVT4;D3VVS9;D3VVS8;D3VVR2;D3VVH7;D3VVF5;D3VVD8;D3VVQ9;D3VVP2;D3VVA9;D3VVA7;D3VVP7;D3V…	G3V328;D3VVT1;D3VVN9;D3VVK3;D3VVS3;D3VVB6;D3VVJ6;D3VVF7;D3VVK1;D3VVB2;D3VVG1;D3VVE5;D3VVE3;C9JQV6;D3VVH9;D3VVE0;D3VVC2;D3VVM5;D3VVE6;D3VVN4;D3VVS7;D3VVJ4;D3VVC7;D3VVC4;A0A087X1A8;D3VVG9;D3VVJ1;G3V3R7;D3VVN7;D3VVM7;D3VVM3;D3VVL0;D3VVI3;D3VVF0;D3VVF3;D3VVS0;D3VVI8;D3VVT5;D3VVJ2;D3VVI9;D3VVH8;D3VVH2;D3VVG7;D3VVT6;D3VVT4;D3VVS9;D3VVS8;D3VVR2;D3VVH7;D3VVF5;D3VVD8;D3VVQ9;D3VVP2;D3VVA9;D3VVA7;D3VVP7;D3V…	Ataxin-3	ATXN3
NaN	NaN	NaN	NaN	NaN	NaN	24.4468	NaN	NaN	3	12.2	35.758	125130000	2	B4DXH2;A0A087X1E4;P53365;B4DUZ3;E9PPY7;E9PRV8	B4DXH2;A0A087X1E4;P53365;B4DUZ3	Arfaptin-2	ARFIP2
NaN	NaN	NaN	NaN	25.2912	25.2476	25.0638	NaN	NaN	2	12.2	17.942	264280000	4	A0A087X1G7;A0A0B4J1S4;O60613	A0A087X1G7;A0A0B4J1S4;O60613	15 kDa selenoprotein	2015-09-01
27.1377	27.1542	27.1187	27.4619	27.2894	27.6337	27.1019	27.2819	27.3305	5	10	88.02	1376400000	13	A0A087X1H5;Q15057;H7C3K3;A0A0U1RQT1;H7C3Q8	A0A087X1H5;Q15057;H7C3K3;A0A0U1RQT1	Arf-GAP with coiled-coil, ANK repeat and PH domain-containing protein 2	ACAP2
NaN	26.989	26.8809	26.1174	26.8957	NaN	NaN	NaN	26.6167	4	0.7	990.84	907690000	5	A0A087X1N7;P20929;Q14215;H0Y786;H7C2D0;Q7Z2R0;Q05C45;Q14214	A0A087X1N7;P20929;Q14215;H0Y786	Nebulin	NEB
NaN	25.9804	NaN	NaN	NaN	NaN	NaN	NaN	NaN	2	3.3	118.35	91615000	7	A8K1E4;A0A0G2JQX1;A0A0G2JPW5;A0A0G2JSA7;A0A087X1Z1;Q96RT8	A8K1E4;A0A0G2JQX1;A0A0G2JPW5;A0A0G2JSA7;A0A087X1Z1;Q96RT8	Gamma-tubulin complex component 5	TUBGCP5
31.8187	31.3533	31.6125	31.7073	31.334	31.4802	31.3789	31.1737	31.5761	8	37.7	27.401	25467000000	67	Q86SZ7;A0A087X1Z3;Q9UL46;H0YM70;Q2TNB3;Q6FHK9;H0YKU2	Q86SZ7;A0A087X1Z3;Q9UL46;H0YM70;Q2TNB3;Q6FHK9	Proteasome activator complex subunit 2	PSME2
NaN	21.9947	21.5067	21.3731	23.3633	NaN	NaN	NaN	NaN	2	1.2	202.29	30582000	4	A0A087X208;O00468;Q5XG79	A0A087X208;O00468;Q5XG79	Agrin;Agrin N-terminal 110 kDa subunit;Agrin C-terminal 110 kDa subunit;Agrin C-terminal 90 kDa fragment;Agrin C-terminal 22 kDa fragment	AGRN
27.7977	27.7137	27.6304	27.6839	27.9351	27.58	27.8064	28.1029	28.0563	12	15.7	102.28	1992700000	27	A0A087X211;Q8TCG1;F8WF26;F8WAX6	A0A087X211;Q8TCG1	Protein CIP2A	KIAA1524
26.994	27.2189	26.8992	26.9207	27.1498	26.9207	26.8952	26.9103	26.8563	7	8.6	136.51	1113100000	17	B7ZKT9;A0A087X256;Q2M389;F8VYH7	B7ZKT9;A0A087X256;Q2M389	WASH complex subunit 7	KIAA1033
28.0159	27.8968	27.8861	27.9061	27.8521	27.6267	27.9843	28.0481	27.6682	11	15.1	116.17	2079400000	34	E9PDU5;B4E256;A0A087X295;Q9NNW5;Q8NDH0;B4DK45;E9PBK6;B4DLP3;Q6AZD6;Q9H9M3;C9K020;V9GZ65;C9JFP6;V9GYU1;Q9NW86;Q6PKC6;B3KRR8	E9PDU5;B4E256;A0A087X295;Q9NNW5;Q8NDH0	WD repeat-containing protein 6	WDR6;DKFZp434F1720
26.2333	26.2046	26.336	26.4183	26.3041	NaN	NaN	NaN	NaN	3	11.8	63.286	470830000	7	A0A087X296;P23219;X6RJD6	A0A087X296;P23219	Prostaglandin G/H synthase 1	PTGS1
NaN	23.4994	23.2278	23.7612	23.3602	23.8971	23.6472	24.0089	23.3681	2	9.2	40.436	100460000	10	Q8N2P0;Q8IXF4;A3KMG1;B4DMV4;G5E965;H0Y882;A0A0B4J2F3;C9J0F0;Q8TEA2;Q548T7;E9PFD3;A0A087X299;Q9H334;C9J5T4	Q8N2P0;Q8IXF4;A3KMG1;B4DMV4;G5E965;H0Y882;A0A0B4J2F3;C9J0F0;Q8TEA2;Q548T7;E9PFD3;A0A087X299;Q9H334;C9J5T4	Forkhead box protein P1	hFKHLB;FOXP1
26.508	26.1171	26.3631	26.6768	26.3518	26.3098	26.3438	26.3247	NaN	3	20.4	20.252	714750000	9	A0A0G2JSB3;I3L1D4;B0QYY7;S4R469;Q8TCM0;F8VR27;F8VZY7;Q59HD3;B0QYV1;X5DP44;B7ZLH9;B0QYY4;A0A087X2B1;A0A0G2JRA5;F8WSN4;X5D7T5;J3KNW3;X5DNY3;B7Z1U7;F8VZG9;O43251;Q9NWB1;B0QYY6;J3QQZ2;J3QRF4;A6NFN3;A0A0G2JRD1;S4R3K7;F5H0M1;B7Z608;F8VRS4	A0A0G2JSB3;I3L1D4;B0QYY7;S4R469;Q8TCM0;F8VR27;F8VZY7;Q59HD3;B0QYV1;X5DP44;B7ZLH9;B0QYY4;A0A087X2B1;A0A0G2JRA5;F8WSN4;X5D7T5;J3KNW3;X5DNY3;B7Z1U7;F8VZG9;O43251;Q9NWB1;B0QYY6;J3QQZ2;J3QRF4;A6NFN3	RNA binding protein fox-1 homolog;RNA binding protein fox-1 homolog 2;RNA binding protein fox-1 homolog 1;RNA binding protein fox-1 homolog 3	RBFOX1;RBFOX2;DKFZp547L059;A2BP1;RBFOX3
26.0894	25.7502	NaN	NaN	25.8265	NaN	26.4152	26.4016	NaN	3	8.6	60.366	533870000	6	Q8IZZ0;A0A087X2B2;E9PMH5;B2R8N8;Q13490;E9PIW1;E9PI77;H0YDY3;Q13489	Q8IZZ0;A0A087X2B2;E9PMH5;B2R8N8;Q13490;E9PIW1	Baculoviral IAP repeat-containing protein 2	BIRC2
29.5888	29.5917	29.3951	29.5055	29.6995	29.6697	29.5004	29.9397	29.819	3	21.7	23.896	7027600000	37	A0A087X2B5;B4DY23;Q54A51;P35613;I3L192;A0A087WUV8;B4DNE1;R4GN83;R4GMX5;A8MZ77	A0A087X2B5;B4DY23;Q54A51;P35613;I3L192;A0A087WUV8;B4DNE1	Basigin	BSG;hEMMPRIN
32.8339	32.769	32.6542	32.7243	32.7676	32.5735	32.6781	32.6911	32.5189	4	54.7	10.32	58247000000	25	A0A087X2D0;B2R6F3;P84103	A0A087X2D0;B2R6F3;P84103	Serine/arginine-rich splicing factor 3	SRSF3;SFRS3
28.8435	28.7757	28.8891	28.9485	28.8746	29.039	28.8737	29.0288	28.86	7	34.3	35.29	4209100000	35	A0A087X2D5;B4DEF8;Q9BRJ2;A0A0G2JMS5;A0A087WU62;Q3MHC5	A0A087X2D5;B4DEF8;Q9BRJ2;A0A0G2JMS5;A0A087WU62	39S ribosomal protein L45, mitochondrial	MRPL45
30.0802	30.1143	30.1768	30.2099	30.2312	30.1267	29.9704	30.1159	30.1096	19	22.5	145.17	9791800000	113	A0A087X2D8;O60271;B4DS36;A0A060L980;Q5JB53;D6RHI8;H0YBE9;H0YBS5;Q719J0;H0Y981;Q7Z5Q8;Q68CV8;G1UI24;E9PFH7;B7ZMF3;A0A087WYG2;Q9UPT6	A0A087X2D8;O60271	C-Jun-amino-terminal kinase-interacting protein 4	SPAG9
26.1767	26.062	NaN	26.1744	26.498	26.3797	26.5567	26.6227	26.6007	8	5.3	289.63	704540000	15	A0A087X2H1;Q9ULT8;G3V4V5;H0YJP0;Q2KQ74;B3KWT6;H0YJD4	A0A087X2H1;Q9ULT8;G3V4V5;H0YJP0	E3 ubiquitin-protein ligase HECTD1	HECTD1
33.0908	32.9064	32.9481	32.8008	32.7554	32.7224	32.9011	32.9163	32.83	20	54	44.16	66303000000	146	V9HW24;A0A087X2I1;P62333;H0YJC0;H0YJS8;B4DR91;H0YJX2;H0YJE9;H0YJT1	V9HW24;A0A087X2I1;P62333	26S protease regulatory subunit 10B	HEL-S-73;PSMC6
28.4145	29.0485	29.05	27.9381	28.3539	28.077	28.1163	28.7429	28.5694	10	30.7	56.073	3257200000	72	E7EP87;A0A088AWN8;Q9UHQ1;J3KT43;B3KSJ1;J3KS48;E9PH27;B4DND8;J3KTP5;J3KRH7;B4DZZ6;J3QRB0;J3KTG5;J3QL28;J3QSD9	E7EP87;A0A088AWN8;Q9UHQ1;J3KT43;B3KSJ1;J3KS48;E9PH27;B4DND8	Nuclear prelamin A recognition factor	NARF
NaN	NaN	NaN	NaN	25.1296	NaN	NaN	NaN	NaN	3	6.3	113.7	95591000	3	B4DGQ2;A0A090HNM7;A0A1W2PS85;Q59FZ7;R4GMW8;P28715;B4E0X0;B4DSI5	B4DGQ2;A0A090HNM7;A0A1W2PS85;Q59FZ7;R4GMW8;P28715;B4E0X0;B4DSI5	DNA repair protein complementing XP-G cells	ERCC5-201;BIVM-ERCC5;ERCC5
31.5004	31.4368	31.6259	31.3339	31.3271	31.4509	31.6232	31.607	31.5824	26	33.6	89.677	25547000000	176	A0A090N7U0;Q13616;A0A0C4DGX4;B4DLA3;B3KTW0;Q75MQ1;B3KU45	A0A090N7U0;Q13616;A0A0C4DGX4;B4DLA3;B3KTW0;Q75MQ1	Cullin-1	CUL1
28.6246	28.4516	28.8561	28.3907	28.0361	27.888	28.9037	28.8383	29.0226	7	50	21.007	3445300000	38	A0A090N7V5;O75223;B8ZZK2;M0QZK8;B3KMN7;H7BZK5;A0A0B4J1Y4	A0A090N7V5;O75223;B8ZZK2;M0QZK8;B3KMN7	Gamma-glutamylcyclotransferase	C7orf24;GGCT
25.1501	NaN	NaN	25.2459	NaN	NaN	25.373	25.3652	25.2876	2	14.2	24.171	262850000	7	A0A090N7V8;Q9NWM8;F8WBZ0;H7C1Z9;H9XW20	A0A090N7V8;Q9NWM8;F8WBZ0;H7C1Z9;H9XW20	Peptidyl-prolyl cis-trans isomerase FKBP14;Peptidyl-prolyl cis-trans isomerase	FKBP14
29.6502	29.5431	29.4343	29.4945	29.2742	29.476	29.3809	29.3603	29.2712	10	38.4	33.304	6107800000	44	A0A090N7W4;Q00535;Q6IAW3;A0A0S2Z355	A0A090N7W4;Q00535;Q6IAW3;A0A0S2Z355	Cyclin-dependent-like kinase 5	CDK5
32.389	32.273	32.5397	32.1975	32.272	32.3449	32.6519	32.8002	32.4889	22	42.1	71.289	49427000000	207	A0A090N7X1;A0A090N7Y2;Q9UG63;C9JHK9;C9JZV3	A0A090N7X1;A0A090N7Y2;Q9UG63;C9JHK9;C9JZV3	ATP-binding cassette sub-family F member 2	ABCF2
26.5751	26.9772	26.4681	26.5395	26.3669	26.7787	26.7908	26.5668	26.5846	2	8.5	95.043	877610000	17	A0A090N7Y0;Q96P47;Q8N8Q2;D3DX07;Q9H3X2;Q96T14;Q86XV5;H0Y873;C9J8Z2;H7C4F1;Q53S93;C9J975;A0A087X044;Q86ST5;E7ESL9;A0A087X1U1;F5GXM9;B2RZG9;E7EUN2;Q9UPQ3	A0A090N7Y0;Q96P47;Q8N8Q2;D3DX07;Q9H3X2;Q96T14;Q86XV5;H0Y873	Arf-GAP with GTPase, ANK repeat and PH domain-containing protein 3	CENTG3;AGAP3;DKFZp761E2216
28.4992	28.5851	28.7181	28.5544	28.7008	28.6119	28.7458	28.9131	28.7313	9	19.4	76.281	3596800000	50	F2YMM1;S4S3R8;A0A090N8E9;Q15910;B7Z8K5;Q75MP9;Q75MQ0;Q6R125;G3XAL2;Q59H64;E9PDH6;B7Z8L6	F2YMM1;S4S3R8;A0A090N8E9;Q15910;B7Z8K5;Q75MP9;Q75MQ0	Histone-lysine N-methyltransferase EZH2	EZH2
33.4343	33.4102	33.5626	33.9705	33.8869	33.9463	33.4347	33.1526	33.4375	31	55.3	77.53	108890000000	313	A0A090N8G0;Q75MN1	A0A090N8G0		GARS
26.9963	27.3435	27.2926	27.1937	27.0529	27.4581	27.3844	27.383	27.4527	6	19.7	41.364	1381400000	23	C9JZE3;C9JYJ8;A8K9F5;A0A090N8H1;Q9BWE0;E7EVL6;A0A090N8Z2	C9JZE3;C9JYJ8;A8K9F5;A0A090N8H1;Q9BWE0;E7EVL6;A0A090N8Z2	Replication initiator 1	REPIN1
NaN	27.3921	27.4792	NaN	NaN	NaN	NaN	NaN	NaN	3	5.8	63.067	426380000	6	B3KQQ0;A0A090N8P3;O95302;B7Z230;B7Z1U8;A8K073;A0A090N7W0;A7YQ73;B7ZAH5;B7Z994;Q75LS8	B3KQQ0;A0A090N8P3;O95302;B7Z230;B7Z1U8	Peptidyl-prolyl cis-trans isomerase FKBP9	FKBP9
28.2661	28.4717	28.4696	28.3372	28.1683	28.3721	28.4421	28.6498	28.4785	5	30.9	26.261	3263100000	48	A0A090N8Q3;Q9BVT8;C9JE12;C9JCW7	A0A090N8Q3;Q9BVT8;C9JE12;C9JCW7	Transmembrane and ubiquitin-like domain-containing protein 1	C7orf21;TMUB1
27.275	27.3664	27.2347	27.5189	27.4382	27.3572	27.0904	26.7521	27.2655	7	15.3	69.118	1347700000	20	A0A090N8Q5;H3BM14;H3BM74;Q9Y5A7;C9JRT6;F8WDB6;C9J7X7;B7Z1C8;F8WDL9;H7C5N1	A0A090N8Q5;H3BM14;H3BM74;Q9Y5A7;C9JRT6;F8WDB6	NEDD8 ultimate buster 1	NYREN18;NUB1
32.8885	32.8029	32.9365	33.037	32.9367	32.9748	32.7332	32.6448	32.6335	24	42.2	72.932	64590000000	237	A0A090N8Y2;P13667	A0A090N8Y2;P13667	Protein disulfide-isomerase A4	ERP70;PDIA4
25.5496	25.6923	26.0297	25.7256	NaN	25.8438	NaN	NaN	NaN	2	21.1	24.115	427200000	14	A0A090N8Y8;Q8NHG8;Q8NEX1	A0A090N8Y8;Q8NHG8;Q8NEX1	E3 ubiquitin-protein ligase ZNRF2	ZNRF2
NaN	28.1828	28.493	NaN	28.3624	28.3434	NaN	28.453	28.6451	4	21.2	20.557	3076600000	14	Q6NZ61;A8K005;A0A090N900;Q15382;C9J931;C9J469;F8WBL3	Q6NZ61;A8K005;A0A090N900;Q15382;C9J931	GTP-binding protein Rheb	RHEB
25.973	26.6741	26.566	26.3345	26.5572	27.3146	27.2316	27.6182	27.6334	2	16	20.885	1106200000	17	A0A096LNV3;A0A096LP02;Q9Y508	A0A096LNV3;A0A096LP02;Q9Y508	E3 ubiquitin-protein ligase RNF114	RNF114
25.1898	NaN	25.3231	25.4019	25.6584	25.7259	25.8784	NaN	25.447	2	9.2	54.448	363050000	11	A0A096LP25;L0R804;Q6ZSR9;A0A096LP60;A0A096LNZ0	A0A096LP25;L0R804;Q6ZSR9	Uncharacterized protein FLJ45252	AAK1
31.2661	31.0755	31.5387	31.3694	30.9933	31.2685	31.3419	31.3113	31.3375	8	49.5	30.376	21994000000	88	A0A096LPI6;H7C1F6;A0A140VKB0;A0A0B4J2D5;P30042;A0A096LNH5;A0A0B4J2H4;H7C2G3;A0A096LNJ1;A0A096LP73;F2Z2Q0;A0A096LP12	A0A096LPI6;H7C1F6;A0A140VKB0;A0A0B4J2D5;P30042;A0A096LNH5;A0A0B4J2H4;H7C2G3	ES1 protein homolog, mitochondrial	C21orf33
26.6918	26.7829	NaN	NaN	27.0735	26.9482	NaN	27.0365	27.0441	2	10	26.074	1061500000	9	A2A2L6;A2A2L5;B4DXL5;A0A0A0MQR2;Q9BY42;B4DEJ8;B2RB99	A2A2L6;A2A2L5;B4DXL5;A0A0A0MQR2;Q9BY42;B4DEJ8;B2RB99	Protein RTF2 homolog	RTFDC1
27.2682	27.0934	26.8246	26.8566	26.9804	26.6249	26.7149	26.9904	27.0244	7	23.2	74.09	1077800000	30	A0A0A0MST9;A0A0A0MQR8;A0A0A0MT23;P27448;A0A0A0MSZ1;J3KNR0;B4DKN1;H0YIY6;Q86U11;H0YNV4;H0YKJ3;H0YKP9;Q9H051;F5H4F6;Q59FB8;A2SY06;O75271;Q96L34	A0A0A0MST9;A0A0A0MQR8;A0A0A0MT23;P27448;A0A0A0MSZ1;J3KNR0;B4DKN1;H0YIY6	MAP/microtubule affinity-regulating kinase 3	MARK3
NaN	NaN	NaN	NaN	NaN	NaN	NaN	NaN	25.9421	4	8.4	74.824	463920000	9	F5H0Q6;B3KSZ8;A0A0A0MQS2;Q8N2M8;K7EM61;K7EKC9	F5H0Q6;B3KSZ8;A0A0A0MQS2;Q8N2M8;K7EM61;K7EKC9	CLK4-associating serine/arginine rich protein	CLASRP
29.213	29.37	29.5324	29.3127	29.6422	29.4914	29.6795	29.6066	29.8187	8	33.5	43.237	6523400000	48	U3KQC1;A0A0A0MQU0;Q9BV38;K7EIR0;A0A087X237;K7EKX5;K7EML4	U3KQC1;A0A0A0MQU0;Q9BV38;K7EIR0	WD repeat-containing protein 18	WDR18
23.8899	24.035	23.8549	24.3794	24.1198	NaN	24.4804	23.992	24.2807	3	4.3	78.825	149070000	11	A0A0A0MQU1;Q27J81	A0A0A0MQU1;Q27J81	Inverted formin-2	INF2
27.8771	28.4991	28.4046	28.1895	28.3247	28.579	28.4269	28.5712	28.461	8	30.5	37.898	2895400000	46	C9JP00;A0A0A0MQX8;Q9NR56;O95205;A0PJJ3;Q86VM6;A2A3S3;Q5VZF2;B4E3F7;B4E233;B1AKI6;Q9NUK0;C9J4T8;C9JCX1;H7C4Y1	C9JP00;A0A0A0MQX8;Q9NR56;O95205;A0PJJ3;Q86VM6;A2A3S3;Q5VZF2	Muscleblind-like protein 1;Muscleblind-like protein 2	MBNL1;MBLL;MBNL2
NaN	25.9199	25.954	25.9989	25.9593	26.0196	26.3966	NaN	NaN	4	8.5	87.58	508810000	12	K7EJD2;A0A0A0MR03;Q9Y5B0;A0A0J9YWJ4;A0A0J9YWB6	K7EJD2;A0A0A0MR03;Q9Y5B0;A0A0J9YWJ4;A0A0J9YWB6	RNA polymerase II subunit A C-terminal domain phosphatase	CTDP1
27.1134	26.6842	26.7863	26.8182	26.462	26.6039	26.5634	26.5279	26.6464	5	20.8	36.039	914640000	27	A0A0A0MR05;Q9BVC4;H3BM50;H3BPU5;B4E2R3;H3BPT1;H3BN58;H3BSZ4;H3BR25;H3BR38	A0A0A0MR05;Q9BVC4;H3BM50;H3BPU5;B4E2R3;H3BPT1;H3BN58;H3BSZ4	Target of rapamycin complex subunit LST8	MLST8
26.6711	25.6843	26.1613	26.1637	26.0258	25.9961	26.5899	26.0755	26.3514	4	2.9	211.99	672800000	11	H0Y966;B7ZME9;A0A0A0MR42;K7ENP4;Q8TEP8;B3KSV4;K7EPA2;Q9HCK3	H0Y966;B7ZME9;A0A0A0MR42;K7ENP4;Q8TEP8;B3KSV4;K7EPA2;Q9HCK3	Centrosomal protein of 192 kDa	CEP192;KIAA1569
29.3836	29.5127	29.5035	29.5245	29.5088	29.5251	29.4145	29.4519	29.1912	16	28.8	110.34	6134200000	83	Q7Z3D7;A0A0A0MR66;A0A0S2Z4W4;P98175;A0A0S2Z4X1;Q6PKH5	Q7Z3D7;A0A0A0MR66;A0A0S2Z4W4;P98175;A0A0S2Z4X1	RNA-binding protein 10	DKFZp686E2459;RBM10
29.2061	29.1842	NaN	NaN	29.0192	29.6358	29.2215	29.2571	28.8825	11	0.5	2993	5185700000	9	D3DPF9;A0A0A0MRA3;C0JYZ2;D3DPG0;A0A0A0MTS7;Q8WZ42	D3DPF9;A0A0A0MRA3;C0JYZ2;D3DPG0;A0A0A0MTS7;Q8WZ42	Titin	TTN
27.5473	27.518	27.1173	27.4173	27.0356	27.1822	27.2987	27.2081	27.0537	8	7.7	176.55	1371900000	30	A0A0A0MRB5;Q8WXG6;C9JM97;C9JLZ9;C9K0L0	A0A0A0MRB5;Q8WXG6	MAP kinase-activating death domain protein	MADD
25.5924	25.7452	25.776	25.5662	25.917	26.0716	25.621	25.7698	26.0194	7	10.1	124.77	492220000	20	A0A0A0MRE5;Q9ULH1;H0YBF7;E5RHD7;H0YBM4	A0A0A0MRE5;Q9ULH1;H0YBF7	Arf-GAP with SH3 domain, ANK repeat and PH domain-containing protein 1	ASAP1
27.4954	27.6141	27.7395	27.5225	27.624	27.7905	28.0606	27.8536	28.0577	24	8.5	453.49	1921100000	61	A0A0A0MRF6;Q99996;Q96KG3;A0A0A0MRE9;A0A087WX84;A4D1E4;H7BYL6;Q5GIA7;B3KQF9;Q5IBP5;Q9UFL2;Q8IW64	A0A0A0MRF6;Q99996;Q96KG3;A0A0A0MRE9	A-kinase anchor protein 9	AKAP9
25.95	25.919	26.0435	26.136	26.3468	26.4952	26.3508	26.535	26.3273	9	6.8	183.12	669970000	32	Q7Z3M0;A0A0A0MRG9;B7ZLE9;A6H8X1;B9EG74;Q66GT8;B3KVI2;A0A0C4ZLW1;Q96SN8;F8WCI3;Q05CZ3;F8WF55;Q6MZT4;Q5CZA0;F8WBJ0;B1AMJ5;C9K0C9;Q5JTU8	Q7Z3M0;A0A0A0MRG9;B7ZLE9;A6H8X1;B9EG74;Q66GT8;B3KVI2;A0A0C4ZLW1;Q96SN8;F8WCI3;Q05CZ3;F8WF55;Q6MZT4;Q5CZA0	CDK5 regulatory subunit-associated protein 2	DKFZp686M1993;CDK5RAP2;DKFZp686E2242;DKFZp686D1070
27.8382	27.9643	28.0747	28.2308	27.8514	28.0646	27.9614	27.7141	27.8704	19	14.2	193.66	2178000000	52	B9EGA7;A0A0A0MRJ0;Q5VT25;Q8IWQ7;Q5HYB0;A0A0A0MRJ1;H0Y5V1;H0Y7V8;H0Y6V3;H0Y6R0;H0YLY0;Q9H5K7;Q86XZ8;Q86TR8	B9EGA7;A0A0A0MRJ0;Q5VT25;Q8IWQ7;Q5HYB0;A0A0A0MRJ1;H0Y5V1;H0Y7V8	Non-specific serine/threonine protein kinase;Serine/threonine-protein kinase MRCK alpha	CDC42BPA;DKFZp686P1738
32.5528	32.0778	32.8367	32.4669	32.1758	32.3902	32.6034	32.6367	33.0265	9	46	30.315	53432000000	86	A0A0A0MRJ6;H7BY58;P22061;F6S8N6;B7Z972;F8WDT3;F8WAV5;F8WAX2;C9J0F2	A0A0A0MRJ6;H7BY58;P22061;F6S8N6;B7Z972	Protein-L-isoaspartate O-methyltransferase;Protein-L-isoaspartate(D-aspartate) O-methyltransferase	PCMT1
29.5084	29.4652	29.4938	29.5678	29.4925	29.5899	29.3702	29.2197	29.3689	4	12.2	51.462	6168400000	47	A0A0A0MRK6;Q13505;A0A0C4DFQ1	A0A0A0MRK6;Q13505;A0A0C4DFQ1	Metaxin-1	MTX1
27.4895	27.9583	27.8644	27.852	27.8888	27.8462	27.3502	27.5497	27.8147	16	16.9	145.01	1881200000	27	A0A0A0MRM8;A0A1Y0BRN0;A0A1Y0BRN3;A0A0D9SGC1;E7EW20;Q9UM54;Q14784;Q5JVM0	A0A0A0MRM8;A0A1Y0BRN0;A0A1Y0BRN3;A0A0D9SGC1;E7EW20;Q9UM54	Unconventional myosin-VI	MYO6
30.3338	30.4917	30.4785	30.4192	30.5729	30.5708	30.4791	30.853	30.7708	9	11.6	73.603	13261000000	72	B2RAU8;A0A0A0MRM9;Q14978;S4R349;Q96J17;S4R402;S4R341	B2RAU8;A0A0A0MRM9;Q14978;S4R349;Q96J17	Nucleolar and coiled-body phosphoprotein 1	NOLC1
28.0655	28.0772	28.0127	28.1575	28.102	27.8705	27.6769	27.7984	27.9018	9	24	67.194	2194400000	54	A0A0A0MRN5;Q05BV5;Q9NZT2;Q6PK21;B3KMQ6;A0A087X028;V9H0E3;V9H0H8	A0A0A0MRN5;Q05BV5;Q9NZT2;Q6PK21;B3KMQ6;A0A087X028;V9H0E3	Opioid growth factor receptor	OGFR
NaN	24.5691	NaN	NaN	NaN	NaN	NaN	NaN	NaN	2	3.4	66.572	152730000	10	Q53FM8;A0A0S2Z5C6;A0A0A0MRP2;O14772;A0A0S2Z4Z3	Q53FM8;A0A0S2Z5C6;A0A0A0MRP2;O14772;A0A0S2Z4Z3	Fucose-1-phosphate guanylyltransferase	FPGT
30.1342	29.9912	30.2012	30.2231	30.2058	30.3673	30.3591	30.5655	30.5762	3	19.5	17.394	11118000000	30	Q5TAL4;Q53G33;A0A0A0MRR7;P09234	Q5TAL4;Q53G33;A0A0A0MRR7;P09234	U1 small nuclear ribonucleoprotein C	SNRPC
25.9906	NaN	25.8779	25.8509	25.8746	25.8905	25.8746	25.961	NaN	2	14.3	26.45	501840000	7	A0A0A0MRS4;Q9NVV0;H7C4C1;H7C3B3	A0A0A0MRS4;Q9NVV0;H7C4C1;H7C3B3	Trimeric intracellular cation channel type B	TMEM38B
29.6953	29.77	29.6025	29.6914	29.8006	29.9203	29.5989	29.616	29.641	13	43.3	42.637	7304700000	84	B6VEX5;B6VEX4;B6VEX3;A0A0A0MRT6;Q59G41;Q8IZP0;B4DKX2;E9PEZ7;E7EW77;E7EP65;A0A0C4DG21;F8WAL6;Q9NYB9;Q53RS4;B7Z836;B4DG63;B7Z9E9;B7ZAM8;B4DSH8;B4DMM5;H0Y6B5;Q13802;Q53SH3;B7Z617;B7Z5L1;B7Z612	B6VEX5;B6VEX4;B6VEX3;A0A0A0MRT6;Q59G41;Q8IZP0	Abl interactor 1	ABI1
26.4468	NaN	26.8345	26.8338	NaN	NaN	NaN	27.1794	NaN	7	38	16.091	1028000000	11	X6RA56;A0A0A0MRV8;Q8NB28;X6RLR1;O75935;X6RCK5	X6RA56;A0A0A0MRV8;Q8NB28;X6RLR1;O75935;X6RCK5	Dynactin subunit 3	DCTN3
NaN	NaN	NaN	NaN	NaN	NaN	NaN	NaN	25.0756	2	5.3	55.697	189350000	6	E7EMV7;B7Z5B0;B7Z8K2;A0A0A0MRZ4;A4F1Y0;A8K4N4;Q15025;H0YC17;E7EW15	E7EMV7;B7Z5B0;B7Z8K2;A0A0A0MRZ4;A4F1Y0;A8K4N4;Q15025;H0YC17;E7EW15	TNFAIP3-interacting protein 1	TNIP1;NAF1
26.9205	27.1522	27.482	27.4154	27.4938	27.6525	27.3982	27.4213	27.7813	8	26.2	60.201	1517200000	18	A0A0A0MS52;A0A0A0MT11;Q13555;Q8WU40;Q5SWX3;A8K6N9;B3KY86;H0Y6G2;B3KTH7;Q13280;B7Z1Z6;H7BXS4;D3DVK8;Q53H78;A4D2J9;Q13554;Q4G1A8;Q8IWE0;Q7LDD5;A8K161;D6R938;A0A024RDK3;E9PBG7;E9PF82;B7Z2B0;Q9UQM7;Q13557;D6RHX9;Q59FI6;E9PBE8;E7EQE4;B4DVQ3;H7BZC6;H0Y9C2	A0A0A0MS52;A0A0A0MT11;Q13555;Q8WU40;Q5SWX3;A8K6N9;B3KY86;H0Y6G2;B3KTH7;Q13280	Calcium/calmodulin-dependent protein kinase type II subunit gamma	CAMK2G
26.1751	26.4982	26.6757	26.6122	26.2034	26.331	26.3332	26.3366	NaN	6	26	31.983	719920000	17	B4E3D6;A0A0A0MS70;H0Y4G9;A0A0A0MST0;Q99836;A0A0A0MSI9;A0A192GQL6;B4DU08;A0A193CK37;B4DT48;A0A192GQD4	B4E3D6;A0A0A0MS70;H0Y4G9;A0A0A0MST0;Q99836;A0A0A0MSI9;A0A192GQL6;B4DU08	Myeloid differentiation primary response protein MyD88	MYD88
25.2839	25.0556	24.9825	24.462	24.9228	24.5945	24.5437	24.7743	24.7468	3	14.6	25.723	251260000	21	K7EN65;K7EMA9;Q59EP6;K7EPZ6;B4DUR3;A0A0A0MS90;A8K654;B4DI41;Q9UIS9	K7EN65;K7EMA9;Q59EP6;K7EPZ6;B4DUR3;A0A0A0MS90;A8K654;B4DI41;Q9UIS9	Methyl-CpG-binding domain protein 1	MBD1
NaN	NaN	NaN	NaN	NaN	NaN	NaN	27.2144	NaN	2	9.4	39.579	302770000	9	B3KSS4;A0A0A0MSA9;A8K4I1;A0A0C4DG49;P15151	B3KSS4;A0A0A0MSA9;A8K4I1;A0A0C4DG49;P15151	Poliovirus receptor	PVR
27.6931	27.7204	28.1082	27.9427	28.2248	28.1401	27.8156	27.7491	28.217	13	24.8	78.808	2195500000	27	A0A0A0MSB8;Q9UPT5;Q5G0E1;A0A0A0MRE1;B4DJ07;Q63HP7;B5MCY9;K7ERQ5;C9JME6;C9JKC2	A0A0A0MSB8;Q9UPT5;Q5G0E1;A0A0A0MRE1;B4DJ07;Q63HP7	Exocyst complex component 7	EXOC7;DKFZp686P1551
NaN	NaN	NaN	NaN	NaN	NaN	NaN	NaN	26.0188	2	18	17.3	364560000	2	H7C2J3;C9JGB2;A0A0A0MSD2;A0A0C4DFM4;Q96LZ7	H7C2J3;C9JGB2;A0A0A0MSD2;A0A0C4DFM4;Q96LZ7	Regulator of microtubule dynamics protein 2	RMDN2
25.718	26.336	26.4252	26.3604	26.3006	26.6064	26.0019	25.877	26.1291	4	33.9	19.307	649130000	22	Q53T40;I0CE67;Q6I9R8;Q2TSB7;Q2XQU9;J3KNW4;A0A0A0MSG2;Q14192	Q53T40;I0CE67;Q6I9R8;Q2TSB7;Q2XQU9;J3KNW4;A0A0A0MSG2;Q14192	Four and a half LIM domains protein 2	FHL2;AAG11
27.8613	23.9546	24.0391	24.7754	24.0352	23.1407	22.864	NaN	22.8557	3	17.7	32.728	343470000	10	B4DS38;A0A0A0MSH6;B5MDU6;Q9H6V9;C9JUM0;B5MCU4;B4DU46;B4DWE2;C9JHU6;B5MCE2;B4DRG3	B4DS38;A0A0A0MSH6;B5MDU6;Q9H6V9;C9JUM0;B5MCU4	UPF0554 protein C2orf43	LDAH;C2orf43
26.6734	26.7859	27.3874	27.127	27.5784	27.2612	27.1022	27.2042	26.8038	8	11	89.974	1225800000	35	A0A0A0MSH9;X5D2E5;Q86WJ1;A0A0A0MRH8;B4DLS6;Q9H678;B4DPN5;A0A087WTM4;A0A1W2PP16;O75435	A0A0A0MSH9;X5D2E5;Q86WJ1;A0A0A0MRH8;B4DLS6;Q9H678;B4DPN5	Chromodomain-helicase-DNA-binding protein 1-like	CHD1L
26.7077	26.5946	26.8927	26.9795	26.6324	26.6382	26.2381	26.5773	26.421	6	18.3	50.403	873230000	20	B3KPJ4;B4DG61;B7ZLY0;A0A0A0MSI2;Q8IXK0;P78365;H7C528;A5YM43;Q8NDX5	B3KPJ4;B4DG61;B7ZLY0;A0A0A0MSI2;Q8IXK0	Polyhomeotic-like protein 2	PHC2
NaN	NaN	NaN	24.4693	24.5229	24.7333	24.4167	24.2937	24.5408	2	2.3	96.999	164980000	8	A0A0A0MSJ9;Q15283;Q59GE8	A0A0A0MSJ9;Q15283;Q59GE8	Ras GTPase-activating protein 2	RASA2
29.2586	29.2521	29.3014	29.2789	29.3328	29.1695	29.2809	29.2082	29.2645	8	30.7	52.406	5384300000	55	A0A0A0MSK5;Q5JTV8;H0Y4R4;H0YD16;H0YDU3	A0A0A0MSK5;Q5JTV8;H0Y4R4	Torsin-1A-interacting protein 1	TOR1AIP1
23.9523	25.3355	24.5507	24.3635	25.3566	24.9839	24.6182	24.9213	24.8583	6	4.6	171.68	276450000	18	A0A0A0MSK6;Q13017	A0A0A0MSK6;Q13017	Rho GTPase-activating protein 5	ARHGAP5
24.7707	NaN	25.2276	25.2249	NaN	NaN	NaN	NaN	NaN	2	32.3	10.506	251870000	4	F6S3S0;A0A0A0MT34;A0A0A0MSM9;F6X9D6;F6R6G4;F6UE82;A0A0A0MSQ2;F8W689;Q53EW3;B2R5R9;P48382;F8WDU3;F8WFE4;F2Z2G0	F6S3S0;A0A0A0MT34;A0A0A0MSM9;F6X9D6;F6R6G4;F6UE82;A0A0A0MSQ2;F8W689;Q53EW3;B2R5R9;P48382;F8WDU3;F8WFE4;F2Z2G0	DNA-binding protein RFX5	RFX5
28.5159	28.5143	29.1979	28.9673	28.33	28.855	28.6387	28.4785	28.876	5	47.1	36.867	3729000000	26	A0A0A0MSS8;P42330;S4R3Z2;B4DKT3;S4R3D5	A0A0A0MSS8;P42330;S4R3Z2	Aldo-keto reductase family 1 member C3	AKR1C3
30.2959	30.2417	30.4176	30.2295	29.8912	29.9879	30.3459	30.2266	30.5236	10	48.3	31.581	10744000000	68	A0A0A0MSW4;P48739;B2R7P6;B3KYB6;B3KYB7	A0A0A0MSW4;P48739;B2R7P6;B3KYB6;B3KYB7	Phosphatidylinositol transfer protein beta isoform	PITPNB
29.1602	29.1294	29.1015	29.3179	29.3247	29.2165	29.0093	28.9527	29.1857	17	21.4	131.13	4995200000	72	X6R433;A0A0A0MT22;P08575;B4E0V3;M3ZCP1;B4DSZ5;A0A075B788;Q6PJK7;E9PKH0;A0A140TA77;A0A140TA68;A0A0G2JNW2;Q6QIM3;A0A140TA57;M9MMK9	X6R433;A0A0A0MT22;P08575;B4E0V3;M3ZCP1;B4DSZ5;A0A075B788;Q6PJK7	Protein-tyrosine-phosphatase;Receptor-type tyrosine-protein phosphatase C	PTPRC
28.2228	27.6891	28.1166	27.847	27.42	27.4071	27.7239	27.5915	27.2932	7	8	145.16	1880800000	47	B7Z876;B7Z3A4;A0A0A0MT33;Q9UPN6;Q8NDE9;Q9H8B2;Q59EY7;Q05BU5	B7Z876;B7Z3A4;A0A0A0MT33;Q9UPN6;Q8NDE9;Q9H8B2;Q59EY7	Protein SCAF8	SCAF8;DKFZp434J2412
NaN	25.3284	25.3484	25.1661	NaN	25.6925	NaN	NaN	NaN	3	5.2	114.69	331000000	12	H3BUD4;A0A0A0MT40;B4DYZ4;Q15111	H3BUD4;A0A0A0MT40;B4DYZ4;Q15111	Phosphoinositide phospholipase C;Inactive phospholipase C-like protein 1	PLCL1
30.9268	30.9684	31.0159	30.9862	31.0947	31.1416	31.0283	31.1177	31.0938	32	18.9	184.64	18603000000	152	A7E2E1;Q9HBD4;B9EGQ8;A0A0A0MT49;P51532;Q59FZ6;B3KNW7;B4E0F1;B4DSI8;A5D6X0;K7EP28	A7E2E1;Q9HBD4;B9EGQ8;A0A0A0MT49;P51532;Q59FZ6	Transcription activator BRG1	SMARCA4
25.8964	25.8293	25.8769	26.0667	26.0193	25.9785	26.3315	26.1402	26.2084	4	16.7	54.287	582820000	20	A0A1W2PQQ0;A0A0A0MT54;H0Y7K5;A0A1W2PPP2;J3KNN9;A0A1W2PR07;P19544;A0A0H5AUY0;H0Y3F0;Q6PI38;E9PKS2;H0YED9	A0A1W2PQQ0;A0A0A0MT54;H0Y7K5;A0A1W2PPP2;J3KNN9;A0A1W2PR07;P19544;A0A0H5AUY0;H0Y3F0;Q6PI38	Wilms tumor protein	WT1
25.2458	NaN	25.0499	25.2838	24.9261	NaN	24.7665	25.0697	NaN	2	16.5	26.713	234120000	9	A0A0A0MT59;B4DXQ8;B3KWX6;Q53EY5;B3KX14;Q15014;Q5JXX1;Q5JXX2	A0A0A0MT59;B4DXQ8;B3KWX6;Q53EY5;B3KX14;Q15014;Q5JXX1;Q5JXX2	Mortality factor 4-like protein 2	MORF4L2
28.6987	28.601	28.1602	28.5581	28.4484	28.4516	28.3774	28.3853	28.3627	7	8.4	136.27	3087600000	16	A0A0A0MT60;Q5T1M5;B4DZS8;B4DVS2;X6RKW4	A0A0A0MT60;Q5T1M5;B4DZS8;B4DVS2	Peptidyl-prolyl cis-trans isomerase;FK506-binding protein 15	FKBP15
NaN	25.9576	24.1019	24.8164	26.1406	NaN	NaN	NaN	NaN	2	16.8	22.765	314830000	10	A0A0A0MT61;G5E979;H7BYM2;Q8WYN0;B4DEA4	A0A0A0MT61;G5E979;H7BYM2;Q8WYN0;B4DEA4	Cysteine protease ATG4A	ATG4A
30.3763	30.1705	30.4664	30.3008	30.3289	30.2692	30.5275	30.6668	30.5211	18	28.9	99.365	12094000000	92	A0A0A0MTB8;Q8NI36	A0A0A0MTB8;Q8NI36	WD repeat-containing protein 36	WDR36
25.5899	25.3504	25.8385	25.6922	NaN	25.4487	25.1882	NaN	25.0097	10	1.9	591.4	414870000	17	A0A0A0MTR7;A0A0A0MTC1;Q63HN8;A0A024R8W2;I3L3H9	A0A0A0MTR7;A0A0A0MTC1;Q63HN8	E3 ubiquitin-protein ligase RNF213	RNF213
NaN	23.9177	NaN	NaN	23.8873	NaN	NaN	NaN	NaN	2	1.6	71.592	27572000	2	B2RDZ1;B7ZL25;A0A140TA45;A0A140TA40;A0A0A0MTG1;B4E0K6;A0A140T8Y0;A0A0G2JIA5;A0A1U9X9B9;A0A1U9X9B5;A0A1U9X9B3;A0A1U9X9A2;A0A140TA36;A0A140TA35;A0A0G2JL52;Q5ST30	B2RDZ1;B7ZL25;A0A140TA45;A0A140TA40;A0A0A0MTG1;B4E0K6;A0A140T8Y0;A0A0G2JIA5;A0A1U9X9B9;A0A1U9X9B5;A0A1U9X9B3;A0A1U9X9A2;A0A140TA36;A0A140TA35;A0A0G2JL52;Q5ST30	Valine--tRNA ligase, mitochondrial	VARS2
28.8723	28.962	29.1034	28.938	29.0821	28.7984	28.8617	28.9892	28.9639	9	26.5	51.419	4347500000	44	V9HWF0;A0A0A0MTH3;Q13418;A0A087WWY6	V9HWF0;A0A0A0MTH3;Q13418	Integrin-linked protein kinase	HEL-S-28;ILK
27.8588	28.0282	28.1221	28.094	27.8864	28.2692	27.9192	28	28.1955	10	7.6	206.89	2322900000	27	Q2M1V9;A0A0A0MTH9;O14981;Q8N6J1;Q59HB6	Q2M1V9;A0A0A0MTH9;O14981;Q8N6J1;Q59HB6	TATA-binding protein-associated factor 172	BTAF1
25.5088	25.2528	25.4528	25.7221	25.2585	25.267	25.1622	24.9167	25.0691	3	11.4	33.944	349300000	6	H7C046;A0A0R4J2G3;A0A0A0MTJ9;Q6PIU2	H7C046;A0A0R4J2G3;A0A0A0MTJ9;Q6PIU2	Neutral cholesterol ester hydrolase 1	NCEH1
29.3534	29.4931	29.5375	29.3886	29.4656	29.5248	29.7003	29.666	29.7837	26	36.2	86.982	6636600000	98	A0A140VKB1;A0A0A0MTN0;Q13617;Q5T2B5;B7Z1Y1;Q5T2B7	A0A140VKB1;A0A0A0MTN0;Q13617;Q5T2B5;B7Z1Y1	Cullin-2	CUL2
NaN	26.9282	NaN	26.9662	27.0776	NaN	26.9998	26.8323	27.0781	3	24.7	9.1078	849010000	8	A0A0A0MTQ5;G3V556;P56378;A0A024R6N3	A0A0A0MTQ5;G3V556;P56378;A0A024R6N3	6.8 kDa mitochondrial proteolipid	C14orf2;MP68
NaN	NaN	29.9389	NaN	30.665	NaN	NaN	NaN	NaN	3	3.8	105.05	7158800000	6	D3DW85;A0A0A6YY96;P48200;H0YNL8;H0YLE0	D3DW85;A0A0A6YY96;P48200;H0YNL8	Iron-responsive element-binding protein 2	IREB2
28.4426	28.344	28.5549	28.8925	28.555	28.5667	28.3119	28.0178	28.4113	5	29.8	21.233	3106600000	29	A0A0A6YYA0;Q9Y3B3;Q3B7W7;B4E2C1;G3V2Y2	A0A0A6YYA0;Q9Y3B3;Q3B7W7;B4E2C1	Transmembrane emp24 domain-containing protein 7	TMED7-TICAM2;TMED7
29.2093	29.1703	29.1576	29.1861	29.2036	29.2025	29.4244	29.6046	29.512	9	23.3	58.199	5592400000	59	A0A0A6YYI3;A0A0B4J1V8;Q9NQ55;A8MV53;H7C446;C9J3W3;C9JHF7	A0A0A6YYI3;A0A0B4J1V8;Q9NQ55;A8MV53;H7C446	Suppressor of SWI4 1 homolog	PPAN-P2RY11;PPAN
26.301	NaN	NaN	25.6223	NaN	25.6218	25.3737	25.7795	26.1957	3	23.5	20.519	457490000	6	A0A0A6YYL1;Q96EE9;A0A0U1RQM3;P49914;A0A0U1RR23	A0A0A6YYL1;Q96EE9;A0A0U1RQM3;P49914;A0A0U1RR23	5-formyltetrahydrofolate cyclo-ligase	ST20-MTHFS;MTHFS
25.5022	25.3986	25.5335	NaN	NaN	25.4938	25.2902	25.3514	NaN	2	20.7	34.325	318990000	3	Q2TAB3;Q1ET63;Q1ET62;Q1ET61;B3KT14;A0A0A6YYL2;P0DMN0;P0DMM9;Q1ET65;H3BPL6;Q1ET64;H3BNY7	Q2TAB3;Q1ET63;Q1ET62;Q1ET61;B3KT14;A0A0A6YYL2;P0DMN0;P0DMM9;Q1ET65;H3BPL6;Q1ET64	Sulfotransferase;Sulfotransferase 1A4;Sulfotransferase 1A3	SULT1A4;ST1A5;SULT1A3
29.6518	29.815	29.8241	29.8524	29.8377	29.912	29.7177	29.7606	29.7501	19	22	114.16	7778300000	77	A0A0A6YYL4;P57737;B4DKU9;B3KSY4;B3KUH7;I3L167;E7EP81;B4E0F2;I3L442;I3L351;I3L212;I3L426;I3L359;I3L1U7;I3L0X9;I3L3T0;I3L2Y6;I3L0X8;I3L1M1;I3NI06;I3L1G9;Q9Y3D7	A0A0A6YYL4;P57737;B4DKU9;B3KSY4;B3KUH7	Coronin;Coronin-7	CORO7-PAM16;CORO7;hCG_1787779
28.4225	28.3041	28.3543	28.7906	28.6855	28.0978	27.4771	28.1795	28.1481	5	5.6	142.15	2733700000	25	A0A193DRS0;A0A0A8JCD0;Q59GR1;O15118;A0A0S2A5C8;B4DIP7;K7EQ23	A0A193DRS0;A0A0A8JCD0;Q59GR1;O15118;A0A0S2A5C8;B4DIP7	Niemann-Pick C1 protein	NPC1
26.4839	26.1818	26.3438	26.6014	26.2874	26.3423	26.638	26.1021	26.2951	2	17.4	15.004	731000000	24	A0A0A8K8N9;Q4G0I0	A0A0A8K8N9;Q4G0I0	Protein CCSMST1	URLC5;CCSMST1
26.1028	26.152	25.5244	25.6766	26.0296	25.6898	26.126	26.135	25.7747	7	10.9	93.846	539880000	16	A0A0A8K9B1;Q9H6E5;F5H0R1;H3BRB1;A0A0S2Z5L2;Q8TER1;C9JBX0;A0A0S2Z5Y5;F8WA97;J3KN81	A0A0A8K9B1;Q9H6E5;F5H0R1;H3BRB1;A0A0S2Z5L2;Q8TER1	Speckle targeted PIP5K1A-regulated poly(A) polymerase	URLC6;TUT1;FLJ00132
26.8762	26.5052	26.8601	26.6072	25.9275	26.3346	26.723	26.6976	26.4519	6	6.9	92.723	843860000	28	A0A0B4J1S8;Q9UBF8;E9PL47;F8W860;A0A0A0MSL0;H0Y4F8;H0YCW3;A6PVV8	A0A0B4J1S8;Q9UBF8	Phosphatidylinositol 4-kinase beta	PI4KB
27.2041	27.3	27.2138	27.3197	27.2893	27.3847	27.6445	27.6881	27.3535	6	8.8	113.01	1467500000	17	A0A0B4J1W0;O75448;B9TX72;B9TX69;F5H5K2;B4DV99;B4E1A5;F5GY88;B9TX65;E9PFL1;B4DDR8;B4DSQ6;B9TX64;B9TX63;B4E0S3;B9TX74;J3KTL3;B9TX73;F5H2D6;B9TX68;B9TX71;B9TX62	A0A0B4J1W0;O75448;B9TX72;B9TX69;F5H5K2;B4DV99;B4E1A5;F5GY88;B9TX65;E9PFL1;B4DDR8;B4DSQ6;B9TX64;B9TX63	Mediator of RNA polymerase II transcription subunit 24	MED24
31.5483	31.8946	31.9682	31.8123	31.8216	31.8178	31.8607	31.9422	31.8267	35	40.3	101.2	32136000000	230	A0A0B4J1W3;B2RBE5;Q9BXJ9;Q58F05	A0A0B4J1W3;B2RBE5;Q9BXJ9;Q58F05	N-alpha-acetyltransferase 15, NatA auxiliary subunit	NAA15;NARG1
32.7342	32.2697	32.6661	32.6549	32.582	32.7561	32.462	32.5793	32.5463	7	43.1	15.763	53892000000	57	A0A0B4J1Z1;B4DEK2;C9JAB2;Q16629;Q8NB80	A0A0B4J1Z1;B4DEK2;C9JAB2;Q16629;Q8NB80	Serine/arginine-rich splicing factor 7	SRSF7
NaN	27.5634	25.8303	25.6191	25.393	NaN	25.0932	24.2745	NaN	5	46.2	13.773	696140000	11	Q86WB4;A0A0B4J202;P48645;Q86WB5;D6RBC9;Q86WB6;E9PDJ7;Q1EHW1	Q86WB4;A0A0B4J202;P48645;Q86WB5;D6RBC9	Neuromedin-U;Neuromedin-U-25	NMU
29.1322	29.4125	29.5376	29.6973	29.6776	29.7295	29.7866	29.4885	29.8203	7	15.8	94.702	6934700000	37	A0A0B4J203;Q6UN15;B4DTW7	A0A0B4J203;Q6UN15;B4DTW7	Pre-mRNA 3-end-processing factor FIP1	FIP1L1
28.4969	28.2514	28.5216	28.4682	28.2484	28.6055	28.8677	28.7537	28.6706	4	39.8	14.234	3310500000	14	A0A0B4J220;L0R588;E9PLD3;E9PRG8	A0A0B4J220;L0R588;E9PLD3;E9PRG8	Uncharacterized protein C11orf98	C11orf98;C11orf48
27.5625	27.881	26.7613	27.2216	26.3027	26.4701	26.2428	26.4113	26.7827	4	36.9	7.2883	1097500000	16	F5H895;A0A0B4J239;F5GXX5;Q53G02;P61803	F5H895;A0A0B4J239;F5GXX5;Q53G02;P61803	Dolichyl-diphosphooligosaccharide--protein glycosyltransferase subunit DAD1	DAD1
27.4466	27.7499	27.731	27.6831	27.591	27.7246	27.6957	27.636	27.7717	9	21.3	51.488	1795600000	41	B3KP31;A0A0B4J2A0;Q9UHJ6;B4DPJ0	B3KP31;A0A0B4J2A0;Q9UHJ6	Sedoheptulokinase	TRPV1;SHPK
28.1143	28.2875	28.2166	28.4986	28.3941	28.539	27.7177	27.8412	28.1274	8	31.2	41.601	2634700000	57	A0A0B4J2A4;B3KNP8;B2RB23;P42765;K7EME0	A0A0B4J2A4;B3KNP8;B2RB23;P42765;K7EME0	3-ketoacyl-CoA thiolase, mitochondrial	ACAA2
26.0657	25.9859	25.9502	26.0352	25.9278	25.9107	25.9251	25.9551	26.1061	4	23	26.941	555080000	11	F8WF49;A0A0B4J2C2;Q9Y2H0;A0A087X246	F8WF49;A0A0B4J2C2;Q9Y2H0	Disks large-associated protein 4	DLGAP4
31.1041	31.6908	31.4486	31.5961	31.3565	31.6485	31.8271	32.2164	31.9874	3	27.3	19.595	29301000000	52	A0A0P1J1R0;Q5W0H4;A0A0B4J2C3;P13693;Q9UP43;B4DKJ4;B4DLD6;J3KPG2;E9PJF7;A0A024RDY2;Q56UQ5	A0A0P1J1R0;Q5W0H4;A0A0B4J2C3;P13693;Q9UP43;B4DKJ4;B4DLD6;J3KPG2;E9PJF7	Translationally-controlled tumor protein	TPT1
NaN	27.1942	NaN	NaN	NaN	NaN	NaN	NaN	NaN	2	27	13.074	692330000	9	A0A0B4J2F8;Q9H1A6;F6S314;E2QRJ6;Q59FR2;P52435;D6RAG0;E7EP90;A0A0B4J1Z8;F8WF84;Q8TDE6;A6NFM0;E7EWC6;H0Y980;Q9H1A7;Q9GZM3	A0A0B4J2F8;Q9H1A6;F6S314;E2QRJ6;Q59FR2;P52435;D6RAG0;E7EP90;A0A0B4J1Z8;F8WF84;Q8TDE6;A6NFM0;E7EWC6;H0Y980;Q9H1A7;Q9GZM3	DNA-directed RNA polymerase II subunit RPB11-a;DNA-directed RNA polymerase II subunit RPB11-b2;DNA-directed RNA polymerase II subunit RPB11-b1	POLR2J3;POLR2J1;POLR2J;POLR2J2
25.9728	26.1461	26.1569	25.9957	26.4386	26.611	25.856	25.7229	25.9886	7	12.1	97.018	606050000	20	A0A0C3SFZ9;M0QZI3;O14526;B7ZAZ3;M0QZI9;M0R1K4;M0QZF0;M0R2J7;M0R107;M0QXW2;M0QZS1;M0QY09;M0QXD1;M0R3E7;M0R3E5;M0QYA9;M0QXY1;M0QYT8;M0QZE1	A0A0C3SFZ9;M0QZI3;O14526;B7ZAZ3;M0QZI9;M0R1K4	F-BAR domain only protein 1	FCHO1
28.1097	28.6037	27.7689	28.3996	28.1482	28.1747	27.1692	27.4933	27.0433	9	26.9	57.278	2174500000	36	A0A0C4DFL7;B3KRC6;Q16850;H7C0D0;Q05D40;C9IYR8	A0A0C4DFL7;B3KRC6;Q16850	Lanosterol 14-alpha demethylase	CYP51A1
26.2154	26.225	26.2613	26.4277	26.4558	26.3387	25.7873	25.9139	25.9093	3	6.1	60.746	639850000	22	Q71MF7;Q9NT61;A0A0C4DFM2;Q6ZN55	Q71MF7;Q9NT61;A0A0C4DFM2;Q6ZN55	Zinc finger protein 574	FP972;DKFZp564M2178;ZNF574
NaN	NaN	NaN	NaN	NaN	NaN	NaN	NaN	NaN	2	9.8	38.306	0	2	H0YDJ1;H0YEE8;A0A0C4DFM7;Q5TAX3;E9PKY2	H0YDJ1;H0YEE8;A0A0C4DFM7;Q5TAX3;E9PKY2	Terminal uridylyltransferase 4	ZCCHC11
27.9262	27.8191	27.7174	27.8232	28.32	28.4302	28.4854	28.1904	28.324	4	11.4	72.011	2469600000	28	A0A0C4DFP4;Q96IV0;H0Y2P2;C9JU75;Q9NV10	A0A0C4DFP4;Q96IV0;H0Y2P2	Peptide-N(4)-(N-acetyl-beta-glucosaminyl)asparagine amidase	NGLY1
27.9855	26.7354	26.6175	27.2579	27.0584	26.524	26.644	27.164	26.8289	4	19.9	36.339	1174500000	21	E3VVS3;A0A0C4DFR3;Q9NQR1	E3VVS3;A0A0C4DFR3;Q9NQR1	N-lysine methyltransferase SETD8	SETD8
25.9713	NaN	26.2166	26.0095	NaN	NaN	26.1678	NaN	26.2064	7	13.2	99.813	576700000	10	A0A0C4DFT3;Q12959;E7EQD7;B4E2H8;B4DF78;Q59FC4;C9JN61;C9JCP6;A8MUT6;Q6PJH1;C9J110;F2Z2L0;C9JUA9;C9IYP1;A8MUT9;C9JWP9;Q8N3T5;C9JYG3;H7C166;O14909;Q6ZSU2;B7Z647;B7Z4H2;B7Z3U2;B9EGL1;B7Z264;E9PIW2;B7Z2T4;E9PN83;P78352;Q15700	A0A0C4DFT3;Q12959;E7EQD7;B4E2H8;B4DF78;Q59FC4	Disks large homolog 1	DLG1
29.0749	30.1823	29.7903	29.0927	29.8358	28.4931	28.2244	28.4783	28.8217	5	37.6	23.672	5375300000	56	Q7Z7M4;A0A0C4DFU2;P04179;A0A0C4DG56;F5H4R2;A0A0C4DFU1;F5GYZ5;Q7Z7M6;Q4ZJI1;Q7Z7M7;F5H3C5;Q7Z7M5;G8JLJ2;Q6LE88;Q9UG59;Q96AM7;G5E9P6;F5GXZ9	Q7Z7M4;A0A0C4DFU2;P04179;A0A0C4DG56;F5H4R2;A0A0C4DFU1;F5GYZ5;Q7Z7M6;Q4ZJI1;Q7Z7M7;F5H3C5;Q7Z7M5	Superoxide dismutase;Superoxide dismutase [Mn], mitochondrial	SOD2
28.0442	28.1249	28.5029	27.9937	28.1405	27.9803	28.2712	28.4822	28.3896	10	24.6	57.348	2625600000	39	Q53GS8;B3KM78;A0A0C4DFX9;Q9H3P2;B3KSP0;B3KTK5;H0Y3X6;C9JHL4;H7C0W2;H7C2C7;C9JEM7;H7C3C2;F8W954;F8WF98;H7C2M8	Q53GS8;B3KM78;A0A0C4DFX9;Q9H3P2;B3KSP0;B3KTK5;H0Y3X6;C9JHL4	Negative elongation factor A	NELFA;WHSC2
25.4171	25.8561	25.9813	26.2884	26.2104	25.9174	25.9546	25.841	25.9809	7	7.1	136.58	630370000	26	A0A0C4DG33;O43933;B4DER6;Q96S70;H7BZH3;B4DEY5;Q59FV4;Q96S69	A0A0C4DG33;O43933;B4DER6;Q96S70	Peroxisome biogenesis factor 1	PEX1;PEX1R633Ter
NaN	NaN	NaN	NaN	NaN	NaN	NaN	29.6231	NaN	2	0.3	964.83	8892100000	11	E7ENN3;Q7RTM4;A0A0C4DG40;Q8NF91	E7ENN3;Q7RTM4;A0A0C4DG40;Q8NF91	Nesprin-1	SYNE1
27.9297	27.9685	28.0251	28.0227	27.8268	27.7129	27.9755	27.7748	27.7116	4	14.4	45.112	2094400000	24	A0A0C4DG44;O43464;A8K7G2;B2BKJ3	A0A0C4DG44;O43464;A8K7G2	Serine protease HTRA2, mitochondrial	HTRA2
27.3471	28.0718	27.751	27.7687	27.854	27.917	27.6492	27.932	28.0216	5	22.5	24.591	1985500000	18	A0A0C4DG62;F8WCT1;Q66PJ3;F5GYV5;H7BZV4;B2RE15;Q8TEM4;F8WEP2;A0A0C4DH18;F5H7X4	A0A0C4DG62;F8WCT1;Q66PJ3;F5GYV5;H7BZV4;B2RE15;Q8TEM4;F8WEP2;A0A0C4DH18	ADP-ribosylation factor-like protein 6-interacting protein 4	ARL6IP4;FLJ00169
27.1499	27.0459	27.0191	27.5356	27.7783	27.6705	27.318	26.874	26.8208	7	14.4	91.353	1350900000	24	Q5JZ08;E7ES21;Q1HE23;A0A0C4DG76;Q9BQS7;Q5JZ07;B4DI78;B4DFV3	Q5JZ08;E7ES21;Q1HE23;A0A0C4DG76;Q9BQS7	Hephaestin	HEPH
32.06	32.1378	32.0574	31.9546	32.0649	32.0678	32.3054	32.2653	32.2902	39	45.3	117.47	40331000000	244	A8K6X3;A0A0C4DG89;Q7L014;D3DQA6;D6RJA6;Q0VGL8;H0Y9U3	A8K6X3;A0A0C4DG89;Q7L014;D3DQA6	Probable ATP-dependent RNA helicase DDX46	DDX46
28.2518	28.224	28.3262	28.404	27.9864	28.1209	28.2642	28.031	28.1477	13	19.8	111.97	2583600000	44	Q59GQ7;A0A0C4DGA6;A8K5B6;Q14527;Q05DQ5;Q05DF7;Q05BZ6;H7C5K0	Q59GQ7;A0A0C4DGA6;A8K5B6;Q14527;Q05DQ5;Q05DF7;Q05BZ6	Helicase-like transcription factor	HLTF
30.823	30.6406	30.818	30.7516	30.5522	30.7825	30.6629	30.6897	30.688	12	38.3	63.93	14778000000	134	Q6AZE3;E9PCH5;B7Z574;A0A1S5UZ18;A0A0C4DGB5;P20810;E7ES10;B7Z5T9;B7Z4U9;Q59HE3;E7EQ12;E7EQA0;Q86YM9;H0Y7F0;B2RCJ7;E9PDE4;A8K8C4;B7Z5T6;B7Z6N0;A0A0C4DGD1	Q6AZE3;E9PCH5;B7Z574;A0A1S5UZ18;A0A0C4DGB5;P20810;E7ES10;B7Z5T9;B7Z4U9;Q59HE3;E7EQ12;E7EQA0;Q86YM9;H0Y7F0;B2RCJ7;E9PDE4;A8K8C4;B7Z5T6;B7Z6N0;A0A0C4DGD1	Calpastatin	CAST
27.19	27.768	27.7616	27.6855	28.0085	28.112	27.9253	27.9017	27.7641	5	19.1	23.243	1965600000	30	A0A0C4DGE4;Q7Z338;A0A0J9YW33;Q53YE2;Q13277;B4DE70	A0A0C4DGE4;Q7Z338;A0A0J9YW33;Q53YE2;Q13277	Syntaxin-3	STX3;DKFZp686L1857;STX3A
NaN	NaN	24.2148	NaN	NaN	24.2113	NaN	24.1377	24.1917	4	18.3	16.175	104580000	7	E9PJ75;E9PNM9;B4DV80;E9PIY1;A0A0C4DGG1;B4DUI2;D3DQR0;Q9UKS6	E9PJ75;E9PNM9;B4DV80;E9PIY1;A0A0C4DGG1;B4DUI2;D3DQR0;Q9UKS6	Protein kinase C and casein kinase substrate in neurons protein 3	PACSIN3
32.5787	32.5973	32.6832	32.6672	32.6162	32.6815	32.644	32.653	32.7023	63	39	217.1	56538000000	431	F5GWX5;A0A0C4DGG9;Q14839;B3KY63;B3KRD4;Q6ZU36;F5H6N4;Q05CG6	F5GWX5;A0A0C4DGG9;Q14839;B3KY63	Chromodomain-helicase-DNA-binding protein 4	CHD4
NaN	NaN	NaN	NaN	NaN	NaN	25.7079	25.702	25.2758	3	9.2	60.556	240670000	5	B7Z5W0;A0A0C4DGH3;A8K033;Q9Y6R0;M0QXQ4;M0QYC2;M0R0Q4;M0QZV7	B7Z5W0;A0A0C4DGH3;A8K033;Q9Y6R0;M0QXQ4;M0QYC2	Numb-like protein	NUMBL
31.8156	31.543	31.9845	31.383	31.253	31.1366	31.2789	31.3367	31.6738	12	53.7	33.786	25709000000	84	A0A0C4DGQ5;P04632;K7ELJ7;K7EIV0;A0A075B7C0;U3KQE2;K7EM73;K7EKD8;U3KPR7;K7ES78;Q96L46;K7EMQ1	A0A0C4DGQ5;P04632;K7ELJ7;K7EIV0;A0A075B7C0;U3KQE2;K7EM73;K7EKD8	Calpain small subunit 1	CAPNS1
28.0591	28.1237	28.0947	28.4465	28.4144	28.3281	27.9472	27.9722	28.0701	5	45.3	15.136	2542600000	29	A0A0C4DGS0;P56556;R4GN43	A0A0C4DGS0;P56556;R4GN43	NADH dehydrogenase [ubiquinone] 1 alpha subcomplex subunit 6	NDUFA6
NaN	NaN	NaN	NaN	NaN	NaN	NaN	24.6467	NaN	2	12.4	25.331	127120000	6	A0A0C4DGU2;Q9Y4U1	A0A0C4DGU2;Q9Y4U1	Methylmalonic aciduria and homocystinuria type C protein	MMACHC
26.7904	26.6085	27.0606	26.5737	26.4433	26.5852	27.1324	26.6249	26.576	3	10.2	30.812	937010000	27	Q53RD8;A0A0C4DGZ1;Q8N5P1	Q53RD8;A0A0C4DGZ1;Q8N5P1	Zinc finger CCCH domain-containing protein 8	LOC84524;ZC3H8
28.2058	27.9905	28.1897	28.2459	28.0075	28.0625	27.8928	28.1703	27.8897	13	31.1	73.393	2399700000	25	B4DDR0;A0A0C4DH01;Q9NVU0;Q53GZ2;H3BNJ0	B4DDR0;A0A0C4DH01;Q9NVU0;Q53GZ2	DNA-directed RNA polymerase III subunit RPC5	POLR3E
30.4133	30.5676	30.5978	30.4583	30.6614	30.5157	30.6587	30.5663	30.6321	22	26.8	90.234	13342000000	152	B4E3D9;A0A0D9SEI3;B7ZVY7;A0A0D9SER5;A0A0D9SEN2;J3QR44;P21127;Q6P5Y5;A4VCI5;J3QR29;B4E0N4;B4E0M9;Q5QPQ9;Q3SWV2;E9PFJ2;A0A024R065;A0A1B0H6K7;A0A024R0C4;A0A1B0GYL8;A0A087WYI9;B4DWE4;A0A087X1I0;Q05C84;Q6PK02;J3KS35;E7ESP2	B4E3D9;A0A0D9SEI3;B7ZVY7;A0A0D9SER5;A0A0D9SEN2;J3QR44;P21127;Q6P5Y5;A4VCI5;J3QR29	Cyclin-dependent kinase 11B	CDK11B;CDC2L1;CDC2L2
NaN	NaN	NaN	24.5515	NaN	NaN	NaN	24.6812	25.6756	3	5.3	81.459	161150000	3	B4DKV5;B4DG54;A0A0D9SEJ5;F5GY05;B4DSS4;Q96EK7	B4DKV5;B4DG54;A0A0D9SEJ5;F5GY05;B4DSS4;Q96EK7	Constitutive coactivator of peroxisome proliferator-activated receptor gamma	FAM120B
NaN	27.3272	27.2824	26.9774	27.7622	28.4894	27.9957	27.9946	28.4447	5	15.9	43.647	2008800000	18	A0A0D9SEM4;Q53F45;A8K644;Q08170;Q59EF5;B4DEM8;A0A0D9SGD2	A0A0D9SEM4;Q53F45;A8K644;Q08170;Q59EF5;B4DEM8	Serine/arginine-rich splicing factor 4	SRSF4;SFRS4
26.4732	26.7378	26.6487	26.6901	26.7984	26.734	26.3843	26.4946	26.6583	5	19.2	67.255	866840000	20	A0A0D9SEU5;R4GMX8;Q6VN20;B4E1Y2;R4GNA3;R4GN91;B3KP49;R4GMX7;B4DHL9	A0A0D9SEU5;R4GMX8;Q6VN20;B4E1Y2	Ran-binding protein 10	RANBP10
NaN	NaN	25.935	25.8061	NaN	NaN	25.7645	25.7536	25.6757	4	23.9	28.004	547090000	15	B4DYA9;A0A0D9SEW3;A0A087WXF8;Q9NP64;A0A087WXU5;A0A087WYV3;A0A087WYF0	B4DYA9;A0A0D9SEW3;A0A087WXF8;Q9NP64;A0A087WXU5;A0A087WYV3	Nucleolar protein of 40 kDa	ZCCHC17
32.6531	32.4991	32.7002	32.669	32.6144	32.5517	32.7638	32.8465	32.6224	25	47.7	70.839	57355000000	183	A0A0D9SFB3;A0A0D9SG12;B5BTY4;A0A0D9SF53;O00571;Q59GX6;A0A024R9A4;O15523;Q5S4N1;B4DLU5;B4E010;B4E132;A0A0J9YVQ7;A0A087WVZ1;A0A0J9YYH6;C9J8G5;C9J081;B4E3C4;A0A087WX09;B4DLA0	A0A0D9SFB3;A0A0D9SG12;B5BTY4;A0A0D9SF53;O00571;Q59GX6;A0A024R9A4;O15523;Q5S4N1;B4DLU5;B4E010;B4E132	ATP-dependent RNA helicase DDX3X;ATP-dependent RNA helicase DDX3Y	DDX3X;DDX3Y
24.5364	25.8697	25.1107	24.6394	24.0171	24.9477	24.858	24.8922	24.9945	3	4.1	107.43	270280000	10	E7EXA6;Q96S08;A0A0D9SF58;Q8WVB6	E7EXA6;Q96S08;A0A0D9SF58;Q8WVB6	Chromosome transmission fidelity protein 18 homolog	CHTF18;RUVBL
NaN	NaN	NaN	NaN	NaN	NaN	NaN	NaN	23.9085	2	3.1	127.21	58817000	1	Q4W5T8;A0A0D9SF60;Q99569;O95645;H0YFB1;E7EST6;Q6LCG8	Q4W5T8;A0A0D9SF60;Q99569;O95645;H0YFB1;E7EST6;Q6LCG8	Plakophilin-4	PKP4;ps1ly2h-25
26.3519	26.9287	26.7466	26.7739	27.3777	26.6636	26.711	26.5754	26.887	5	10.9	53.119	971100000	9	A0A0D9SFL2;M0QYH2;A0A1S5RA93;Q96T60;M0R3C8;M0QYI1;A0A0D9SEV0;M0R000;A0A0D9SFD6	A0A0D9SFL2;M0QYH2;A0A1S5RA93;Q96T60;M0R3C8;M0QYI1	Bifunctional polynucleotide phosphatase/kinase;Polynucleotide 3-phosphatase;Polynucleotide 5-hydroxyl-kinase	PNKP
29.7962	30.0991	30.2718	30.2626	30.4035	30.5028	30.1803	30.2619	30.2853	3	11.4	32.071	10573000000	35	H7BY36;A0A0D9SFL3;B0QYK0;C9JGE3;Q01844	H7BY36;A0A0D9SFL3;B0QYK0;C9JGE3;Q01844	RNA-binding protein EWS	EWSR1
NaN	NaN	NaN	NaN	NaN	NaN	25.852	NaN	NaN	3	8.3	38.37	374050000	9	A0A0D9SFR5;H3BQ06;H3BNU1;Q9ULP9;H3BV07	A0A0D9SFR5;H3BQ06;H3BNU1;Q9ULP9;H3BV07	TBC1 domain family member 24	TBC1D24
28.0491	27.2794	27.388	27.357	27.2121	27.1105	27.3644	27.3438	27.2164	3	40.3	13.635	1483800000	9	A0A0D9SG71;B4DWT6;Q53G67;P49459;A0A0D9SEZ6;A0A0R4J2E5;Q53G86;Q8WXB3	A0A0D9SG71;B4DWT6;Q53G67;P49459;A0A0D9SEZ6;A0A0R4J2E5;Q53G86	Ubiquitin-conjugating enzyme E2 A	UBE2A
27.3898	27.1595	27.4205	27.3824	27.407	27.4164	27.3729	27.2366	27.0827	6	15.7	65.215	1409100000	29	A0A1B0GWF2;A0A1B0GVQ5;A0A0D9SG72;A0A1B0GTP9;Q68CM6;P61764;B7Z2V7;A0A1B0GW76;B7Z3F4;B7Z1V5;A0A0D9SEH5;A0A0D9SFQ7;A0A0D9SFW6;Q59GC9;A0A0D9SEP9;A0A1B0GTD8;A0A1B0GVV9	A0A1B0GWF2;A0A1B0GVQ5;A0A0D9SG72;A0A1B0GTP9;Q68CM6;P61764;B7Z2V7;A0A1B0GW76;B7Z3F4;B7Z1V5;A0A0D9SEH5;A0A0D9SFQ7;A0A0D9SFW6;Q59GC9	Syntaxin-binding protein 1	STXBP1;stxbp1
27.6342	27.8167	27.6727	27.6976	27.8609	28.01	27.8801	27.876	27.8866	7	21	41.361	1982000000	29	A0A0D9SGE8;Q8IWS0;Q5JRC6;B4E138	A0A0D9SGE8;Q8IWS0;Q5JRC6;B4E138	PHD finger protein 6	PHF6
27.2574	27.5365	27.3242	27.926	27.9632	27.8907	26.973	26.7197	26.8867	10	24.6	60.143	1524500000	37	A0A0D9SGG1;Q13094;B4DT07;E7ESF6;B4DJI9;C7C5T4;E5RKA2	A0A0D9SGG1;Q13094;B4DT07;E7ESF6;B4DJI9	Lymphocyte cytosolic protein 2	LCP2
NaN	24.5161	24.4092	NaN	24.6113	24.5879	NaN	NaN	24.5067	3	2.5	139.91	170670000	8	J3KPK1;B9EGN3;C9JFZ1;A0A0D9SGJ6;J3KQV8;O43426;C9JW66;Q05CZ1	J3KPK1;B9EGN3;C9JFZ1;A0A0D9SGJ6;J3KQV8;O43426;C9JW66;Q05CZ1	Synaptojanin-1	SYNJ1
NaN	NaN	23.6385	NaN	NaN	NaN	NaN	23.6316	23.7791	2	1.9	119.1	90794000	3	A0A0F6QNT9;Q9NS56	A0A0F6QNT9;Q9NS56	E3 ubiquitin-protein ligase Topors	TOPORS
30.4638	30.2852	30.3573	30.0762	30.027	30.018	30.3364	30.316	30.2167	17	44	67.27	10678000000	126	A0A0F7L0Q8;A0A0F7KYT8;B4DM78;H7C4S4;C9JZE0;C9JY20;C9JAJ4;C9IZ22;C9JYQ6;A0A0F7L2Z7;Q14341;C9J5B4	A0A0F7L0Q8;A0A0F7KYT8;B4DM78
28.5824	28.6705	28.762	28.3754	28.4537	28.8865	28.8099	28.8726	28.8358	7	17.4	82.688	3711200000	36	A0A0F7NGI8;Q32MZ4;B4DPC0;Q05D04;C9JTC6	A0A0F7NGI8;Q32MZ4;B4DPC0;Q05D04	Leucine-rich repeat flightless-interacting protein 1	LRRFIP1
NaN	23.5371	25.6658	NaN	NaN	NaN	NaN	NaN	NaN	2	6.6	30.461	71243000	2	B2D1N3;A0A0G2JH30;A0A0G2JPX0;P49918;A6NK88	B2D1N3;A0A0G2JH30;A0A0G2JPX0;P49918;A6NK88	Cyclin-dependent kinase inhibitor 1C	CDKN1C
NaN	NaN	25.3195	25.4102	NaN	NaN	25.4398	25.6708	25.4367	3	19.2	35.872	283390000	7	G1EFQ4;E0AG58;A0A140T9H4;A0A140T9D8;A0A0G2JH91;Q0EFB4;J9VA75;A0A140T979;A0A1V0E449;A0A0G2JH58;Q29980;A0A0F7KLE7;A0A0G2JHB5;F5H7Q8;J9VA79;J9V8A4;X6R344;D2KNA0;B7Z8M1;G8EFJ1;G8EFJ0;H9B8I7;B4DUT9;A0A024RCJ5;J9UUC4;J9V6K4;A0A1V0E420;A0A140T9M6	G1EFQ4;E0AG58;A0A140T9H4;A0A140T9D8;A0A0G2JH91;Q0EFB4;J9VA75;A0A140T979;A0A1V0E449;A0A0G2JH58;Q29980;A0A0F7KLE7;A0A0G2JHB5;F5H7Q8;J9VA79;J9V8A4;X6R344	MHC class I polypeptide-related sequence B	MICB
33.0771	33.2103	33.1435	33.2926	33.2255	33.288	33.0969	33.103	33.0779	49	46.2	141.36	81678000000	375	A0A0G2JH68;O60610;A0RZB8;A0A140T8Z0;Q6URC4;H9KV28;A0A1E1ERW3;B4DVR3;Q96IL1;Q7KZJ7;B4E2I7;A0RZB7;H7C2W8;E5RJ79;Q6UUU0	A0A0G2JH68;O60610;A0RZB8;A0A140T8Z0;Q6URC4;H9KV28;A0A1E1ERW3;B4DVR3	Protein diaphanous homolog 1	DIAPH1
36.2871	36.3148	36.4262	36.3725	36.3103	36.459	36.5867	36.4551	36.3885	34	64.3	70.051	762110000000	457	A8K5I0;A0A1U9X7W4;A0A0G2JIW1;P0DMV9;P0DMV8;Q59EJ3;B4DWK5;B4DFN9;B4DNT8;B4DI39;B4E1S9;B4DVU9;B4E388;V9GZ37;B3KTT5;B4DNX1;B4E1T6;B4DNV4;Q9UQC1	A8K5I0;A0A1U9X7W4;A0A0G2JIW1;P0DMV9;P0DMV8;Q59EJ3;B4DWK5;B4DFN9;B4DNT8;B4DI39;B4E1S9;B4DVU9;B4E388;V9GZ37;B3KTT5;B4DNX1	Heat shock 70 kDa protein 1B;Heat shock 70 kDa protein 1A	HEL-S-103;HSPA1B;HSPA1A
26.5772	26.1942	26.9844	26.5542	26.481	26.3113	25.8271	25.7706	26.4058	3	17.9	20.96	731380000	9	A2ACR1;A0A0G2JJA7;A0A1U9X8E3;A0A1U9X8E2;A0A1U9X8D7;P28065;A2ACR0;A0A0G2JJQ0	A2ACR1;A0A0G2JJA7;A0A1U9X8E3;A0A1U9X8E2;A0A1U9X8D7;P28065	Proteasome subunit beta type;Proteasome subunit beta type-9	PSMB9
28.9313	29.148	29.2402	29.4144	29.3289	29.2263	29.2834	29.2789	29.1912	14	36.6	63.243	5265600000	66	A0A1U9X777;A0A0G2JJD3;O95870;A8K0A4;B3KNX9;A0A0G2JI89;F2Z3H2	A0A1U9X777;A0A0G2JJD3;O95870;A8K0A4;B3KNX9	Abhydrolase domain-containing protein 16A	ABHD16A;BAT5
NaN	NaN	NaN	NaN	NaN	NaN	NaN	NaN	25.9042	2	11.7	25.565	354700000	9	Q06310;A0A0G2JKR7;J3JS71;A0A0S2Z4M5;Q5STP9;A0A0S2Z570;P28702;A0A0G2JHI1;B7Z6X3;A0A087WZ88;B7Z7J5;B4DQE4;B4E371;B6ZGU2;F1D8R3;F1D8Q7;B6ZGT6;B2R7C0;H9NIM2;P10588;P48443;P13056	Q06310;A0A0G2JKR7;J3JS71;A0A0S2Z4M5;Q5STP9;A0A0S2Z570;P28702;A0A0G2JHI1;B7Z6X3;A0A087WZ88;B7Z7J5;B4DQE4;B4E371;B6ZGU2;F1D8R3;F1D8Q7;B6ZGT6;B2R7C0;H9NIM2;P10588;P48443;P13056	Retinoic acid receptor RXR-beta;Nuclear receptor subfamily 2 group F member 6;Retinoic acid receptor RXR-gamma;Nuclear receptor subfamily 2 group C member 1	RXRB;RXRG;NR2F6;NR2B3;NR2C1
27.8243	28.3272	28.2843	27.9342	27.9903	28.1768	28.2695	28.4324	28.1547	11	12.9	117.85	2528400000	40	A0A0G2JMG8;A0A0G2JLX3;J3KN39;A0A0G2JPQ2;Q9NX02;A8K9G6;A0A0G2JP37;A0A0G2JNC8;A0A0G2JPB6;A0A0G2JLQ8;K7ELX1;F5H5B1;Q8WY49;K7EPE6;F5GYZ4;F5H7Q5;K7EJ90	A0A0G2JMG8;A0A0G2JLX3;J3KN39;A0A0G2JPQ2;Q9NX02;A8K9G6;A0A0G2JP37;A0A0G2JNC8;A0A0G2JPB6;A0A0G2JLQ8	NACHT, LRR and PYD domains-containing protein 2	NLRP2
29.2336	29.2636	29.2711	29.2032	29.0209	29.0688	29.1716	29.1939	28.9947	15	17.6	165.27	5019900000	77	A0A0G2JMS7;A0A0G2JNZ2;A0A0G2JPP5;Q14160;H0YCG0;A0PJK8;H0YDF9;Q8WYU8	A0A0G2JMS7;A0A0G2JNZ2;A0A0G2JPP5;Q14160	Protein scribble homolog	SCRIB
23.3516	24.103	23.3733	23.3381	23.5951	24.2669	23.8862	23.4386	23.5873	2	4.1	60.844	113580000	10	B3KS93;A0A0G2JN84;P59817	B3KS93;A0A0G2JN84;P59817	Zinc finger protein 280A	ZNF280A
31.5859	31.6441	31.5863	31.5322	31.4749	31.615	31.8721	31.7488	31.6835	19	61.2	54.626	28086000000	150	A0A0J9YYL3;A0A0J9YVP6;A0A0J9YVR6;E9PQ56;E9PN18;E9PMU7;H0YCP8	A0A0J9YYL3;A0A0J9YVP6;A0A0J9YVR6;E9PQ56		PUF60
NaN	24.74	NaN	24.0175	NaN	NaN	NaN	NaN	NaN	2	16.7	21.006	80176000	10	Q8NCA8;A0A0J9YW36;Q9NZ72;A0A0J9YXY4	Q8NCA8;A0A0J9YW36;Q9NZ72;A0A0J9YXY4	Stathmin;Stathmin-3	STMN3
NaN	NaN	NaN	NaN	NaN	NaN	NaN	24.4208	NaN	2	12.2	25.141	149040000	1	A0A0J9YWI0;Q4VXZ8;Q9NUI1	A0A0J9YWI0;Q4VXZ8;Q9NUI1	Peroxisomal 2,4-dienoyl-CoA reductase	DECR2
27.6853	27.3272	27.5104	27.8867	27.6993	27.7609	27.6867	27.861	27.9947	5	22.8	29.487	1873000000	29	B4DVN1;A0A0J9YX62;O75190;C9J2C4;B4DNN5;C9JB42;C9JDR7;C9JDX6;F8WCZ4;C9J2P2;B4DNF1;E9PH18;B4DMJ9;A7UJ17;C9JN01;Q49A72;A0A140VJI2;Q8WWF6;Q8NHS0	B4DVN1;A0A0J9YX62;O75190;C9J2C4;B4DNN5;C9JB42;C9JDR7;C9JDX6;F8WCZ4;C9J2P2;B4DNF1;E9PH18;B4DMJ9;A7UJ17	DnaJ homolog subfamily B member 6	DNAJB6
25.7249	26.0059	NaN	NaN	NaN	26.0504	25.9704	25.9448	26.1921	2	8.8	37.98	485260000	7	J3QT77;A0A0J9YYG4;B4DKM6;B4DW02;A0A0J9YXF2;Q15165;Q6PJZ2;G3XAK4	J3QT77;A0A0J9YYG4;B4DKM6;B4DW02;A0A0J9YXF2;Q15165;Q6PJZ2;G3XAK4	Serum paraoxonase/arylesterase 2	PON2
31.0598	31.0284	31.1954	31.0904	30.9927	31.1654	31.0236	31.1019	31.1279	15	29.4	55.731	19153000000	169	E9PC62;A0A0J9YXJ0;V9GYD9;B4DT00;B4DDE7;Q5VZZ6;B2RA86;B4DS31;A0A0J9YX66;A0A1B0GU44;A0A1B0GUN8;O95319;B4DSZ2;B4DIB6;V9GY47;A0A0J9YXK1	E9PC62;A0A0J9YXJ0;V9GYD9;B4DT00;B4DDE7;Q5VZZ6;B2RA86;B4DS31;A0A0J9YX66;A0A1B0GU44;A0A1B0GUN8;O95319;B4DSZ2	CUGBP Elav-like family member 2	CELF2
25.7962	NaN	26.0188	25.9658	NaN	NaN	NaN	26.1649	NaN	7	6.6	211.57	417230000	9	A0A0J9YXM6;Q562E7;I3L1G2	A0A0J9YXM6;Q562E7	WD repeat-containing protein 81	WDR81
26.7358	26.5884	NaN	27.0449	27.2493	27.1354	NaN	NaN	26.3812	3	15.9	26.67	799810000	11	A6XMV8;Q5NV56;Q3SY20;Q3SY19;A0A0J9YYC8;Q7Z5F3;A6XMV9;P07478;Q6PK75;Q8NHM4;Q86W17;Q53ZX9;Q53ZX8;Q53ZX7;Q45KI0;H0Y8D1;CON__P07477;Q8N2U3;Q7Z5F4;E7EQ64;P07477;P35030	A6XMV8;Q5NV56;Q3SY20;Q3SY19;A0A0J9YYC8;Q7Z5F3;A6XMV9;P07478;Q6PK75;Q8NHM4	Trypsin-2;Putative trypsin-6	TRY8;PRSS2;PRSS1;PRSS3P2
33.1886	33.2081	33.1959	33.3878	33.3443	33.5248	33.2668	33.1886	33.3585	36	52.9	85.564	89375000000	330	A0A0K0K1H7;A2A274;Q99798;B4DZ08;B2RBW5;B4DLY4;B4DJW1;B4DEC3;B4DW08;Q71UF1;O75944	A0A0K0K1H7;A2A274;Q99798;B4DZ08;B2RBW5;B4DLY4;B4DJW1;B4DEC3;B4DW08;Q71UF1	Aconitate hydratase, mitochondrial	ACO2
33.3159	33.2957	33.3657	33.2569	33.2986	33.2498	33.2734	33.3577	33.3433	19	67.2	26.713	88826000000	175	Q05DH1;A0A0K0K1K4;O14818;H0UI83;H0Y586;B0YJ74;Q8TAA3;A0A087WYS6;F5GY34;Q4G1B8	Q05DH1;A0A0K0K1K4;O14818;H0UI83	Proteasome subunit alpha type;Proteasome subunit alpha type-7	PSMA7;hCG_41772
31.1616	30.8742	30.9507	31.0105	30.6755	30.8148	30.7097	30.5719	30.5721	11	70.9	27.547	15996000000	63	A0A0K0K1K7;O95336;M0R261;M0R0U3;M0R1L2	A0A0K0K1K7;O95336;M0R261;M0R0U3	6-phosphogluconolactonase	PGLS
NaN	NaN	NaN	NaN	NaN	NaN	NaN	NaN	26.3106	2	11.9	29.246	777820000	1	V9HW21;A0A0K0K1L1;P00918	V9HW21;A0A0K0K1L1;P00918	Carbonic anhydrase 2	HEL-76;CA2
31.7126	31.6318	31.8221	31.9112	31.6467	31.8689	31.6798	31.6027	31.7483	14	60.2	28.709	30009000000	96	Q6FHU3;A0A0K0K1L8;Q06323;Q86SZ9;H0YKK6;H0YLU2	Q6FHU3;A0A0K0K1L8;Q06323;Q86SZ9	Proteasome activator complex subunit 1	PSME1
24.9268	24.9431	24.8685	24.7634	24.8621	24.9293	24.8081	24.7733	24.8962	3	5	55.329	255920000	8	L7NSP5;G4WMG7;A0A0U1WL47;A0A0K0L4Y8;A0A0K0L4Y0;Q96AD5;A0A1W6R6W1	L7NSP5;G4WMG7;A0A0U1WL47;A0A0K0L4Y8;A0A0K0L4Y0;Q96AD5;A0A1W6R6W1	Patatin-like phospholipase domain-containing protein 2	ATGL;PNPLA2
26.7808	26.5476	26.6869	26.3847	26.5993	26.6014	26.4375	26.7586	26.4688	4	16.7	24.307	847020000	20	A0A0M3HER1;P48059;B3KNZ3;Q7Z4I3;Q7Z4I4;Q7Z4I5;A0A024RAH1;A0A0J9YXC7;Q7Z4I7;A0PJ44;H0Y592;Q9NWG2	A0A0M3HER1;P48059;B3KNZ3;Q7Z4I3;Q7Z4I4;Q7Z4I5;A0A024RAH1;A0A0J9YXC7;Q7Z4I7	LIM and senescent cell antigen-like-containing domain protein 1;LIM and senescent cell antigen-like-containing domain protein 2	LIMS1;LIMS2
NaN	NaN	26.5582	26.0616	26.2188	NaN	25.454	26.5192	NaN	3	20	18.807	711030000	16	A0A0M3HER2	A0A0M3HER2
30.2738	30.2471	30.3626	30.3815	30.3137	30.2948	30.2634	30.2374	30.3149	32	25.3	174.76	11129000000	127	A0A0S2A4E4;A0A0M4G3H8;P35573;G1UI17;A0A1C7CYW1	A0A0S2A4E4;A0A0M4G3H8;P35573;G1UI17	Glycogen debranching enzyme;4-alpha-glucanotransferase;Amylo-alpha-1,6-glucosidase	AGL
33.944	33.8537	33.9333	33.8701	33.8889	33.8155	34.0798	33.9708	33.8663	31	47	94.622	136170000000	336	A0A0R4J2E8;P43243;A8MXP9;D6REM6;Q68D11;Q5CZA7;B3KM87;B4DRS1;D6R991;B4DF66;H0Y8T4;Q9H4N1;D6RBI2;D6RBK5;D6RE02;D6RIA2;D6RAM9;D6RAY2;D6RCM3;D6REK4;D6R8Z5;D6RB45;A0A1B0GX04;D6R9F3;D6RBS2;Q68E03	A0A0R4J2E8;P43243;A8MXP9;D6REM6;Q68D11;Q5CZA7;B3KM87;B4DRS1;D6R991;B4DF66	Matrin-3	MATR3;DKFZp686K23100;DKFZp686K0542
28.9182	28.5308	28.8622	28.6815	28.1937	28.5601	28.6514	28.9295	28.9555	4	56	13.262	3725600000	29	A0A0R4J2F3;Q9Y2S0	A0A0R4J2F3;Q9Y2S0	DNA-directed RNA polymerases I and III subunit RPAC2	POLR1D
26.885	26.7239	27.0312	27.2241	26.8923	27.1226	27.1932	27.3008	27.3787	6	19.7	39.241	1199200000	24	B2WTI3;B2WTI4;K7EJU9;A0A0S2PZM4;Q6NYC1	B2WTI3;B2WTI4;K7EJU9;A0A0S2PZM4;Q6NYC1	Bifunctional arginine demethylase and lysyl-hydroxylase JMJD6	JMJD6
30.0392	30.1606	30.3091	30.3781	30.1703	30.2744	30.2193	30.2482	30.2754	33	21.4	242.06	10548000000	192	A0A0S2Q0B1;O14497;H0Y488;A0A1B0GTU5;Q8NC65;Q96SM7;Q96T01;Q4LE49;Q96TA9;A0A087WUV6;Q96SY8;A4FU79;H0YCU6;H0YEW5	A0A0S2Q0B1;O14497;H0Y488;A0A1B0GTU5	AT-rich interactive domain-containing protein 1A	ARID1A
28.9063	28.9029	29.0655	29.0488	29.1477	29.1125	28.691	28.5473	28.8909	13	24.3	75.276	4276200000	59	A0A0S2Z377;A8K3Q7;A0A0S2Z2Z6;P08133;B7Z582;E5RJF5;E5RK63;A0A0S2Z301;Q6ZP35;E7EMC6;E5RJR0;E5RI05;E5RFF0;E5RIU8	A0A0S2Z377;A8K3Q7;A0A0S2Z2Z6;P08133;B7Z582	Annexin;Annexin A6	ANXA6
31.6114	31.7215	31.7836	31.9045	31.85	32.0143	31.749	31.6648	31.7764	15	46.8	46.588	31050000000	121	A0A0S2Z366;Q5T4U5;P11310;B7Z9I1;Q5HYG7;B4DWX6;B4DVB1;B4DJE7;B4DVE0;A0A0S2Z3A5;E9PJM9;E9PRX4;H0YDT5	A0A0S2Z366;Q5T4U5;P11310;B7Z9I1;Q5HYG7;B4DWX6;B4DVB1;B4DJE7;B4DVE0	Medium-chain specific acyl-CoA dehydrogenase, mitochondrial	ACADM;DKFZp686M24262
27.5795	28.0018	27.7005	27.4505	27.8907	27.6848	27.4819	27.5948	27.601	11	21.3	77.437	1779600000	51	A0A0S2Z3I6;A0A0S2Z392;P25098;E9PRV7;Q59F73;A8K869;A0A024R1D8;P35626;Q8N433	A0A0S2Z3I6;A0A0S2Z392;P25098;E9PRV7	Beta-adrenergic receptor kinase 1	ADRBK1
27.529	27.7789	27.8132	27.9224	27.8664	28.1991	27.5119	27.5347	26.8422	5	25.8	16.703	1827500000	22	A0A0S2Z3D2;Q5TE63;Q5QP56;Q9H1R6;Q5TE64;A0A0S2Z3C5;Q07817;Q5QP59	A0A0S2Z3D2;Q5TE63;Q5QP56;Q9H1R6;Q5TE64;A0A0S2Z3C5;Q07817	Bcl-2-like protein 1	BCL2L1
26.1139	26.4198	26.0907	26.0034	26.0285	26.135	26.1128	26.3617	26.3082	3	18.4	34.643	641240000	14	D6RAD4;A0A0S2Z3F9;P50613;D6R9G1;D6REC6	D6RAD4;A0A0S2Z3F9;P50613;D6R9G1	Cyclin-dependent kinase 7	CDK7
28.3596	27.6723	28.2608	28.6312	27.9992	27.9606	27.6355	27.6125	27.6696	5	46.7	14.91	2277300000	24	C9JAX1;A0A0S2Z3G4;Q16595;H7C585	C9JAX1;A0A0S2Z3G4;Q16595;H7C585	Frataxin, mitochondrial;Frataxin intermediate form;Frataxin(56-210);Frataxin(78-210);Frataxin mature form	FXN
24.9734	25.6648	25.6082	25.6621	NaN	25.5851	25.8078	25.5157	26.1402	4	10.2	54.565	443620000	9	A0A0S2Z3G5;A0A0S2Z3Z5;Q92851;B4E3T5	A0A0S2Z3G5;A0A0S2Z3Z5;Q92851	Caspase-10;Caspase-10 subunit p23/17;Caspase-10 subunit p12	CASP10
34.8546	35.0273	34.9713	35.0543	35.0032	35.1648	34.9345	34.9053	34.8958	49	62.5	104.85	285460000000	608	A0A0S2Z3G9;O43707;Q96BG6;F5GXS2;B4E337;B4DSX0;H7C144;A0A0S2Z3X3;A0A0S2Z3C0;K7EP19;B3W6H4	A0A0S2Z3G9;O43707;Q96BG6;F5GXS2	Alpha-actinin-4	ACTN4
27.4359	27.4671	27.337	27.5848	27.2304	27.5887	27.6291	27.5304	27.8753	11	33.2	50.685	1622700000	35	A0A0S2Z3H1;P42575;D3DXD8;D3DXD9;B4E0I5;C9JRR9;D3DXE0;A0A0S2Z3I0;A0A087WYM1;B4E085	A0A0S2Z3H1;P42575;D3DXD8;D3DXD9;B4E0I5	Caspase-2;Caspase-2 subunit p18;Caspase-2 subunit p13;Caspase-2 subunit p12;Caspase	CASP2;hCG_20684
NaN	27.3377	26.6555	26.8526	27.428	NaN	NaN	NaN	NaN	2	3.4	76.096	1200400000	8	A0A0S2Z3H2;A0A0S2Z3H6;O96005;K7EQQ1;K7ERL5	A0A0S2Z3H2;A0A0S2Z3H6;O96005;K7EQQ1;K7ERL5	Cleft lip and palate transmembrane protein 1	CLPTM1
28.6205	28.4569	28.4926	28.4041	28.6332	28.6964	28.6126	28.6233	28.4357	6	54	33.064	3300500000	11	A0A0S2Z3H3;P12235;A8K787;V9GYG0;A0A0S2Z359;A0A0S2Z3C4;Q59EP7	A0A0S2Z3H3;P12235;A8K787;V9GYG0;A0A0S2Z359;A0A0S2Z3C4;Q59EP7	ADP/ATP translocase 1	SLC25A4
29.7192	29.801	29.7943	30.0814	29.909	30.0314	29.7102	29.6026	29.6505	12	33.4	44.25	7904500000	72	Q5FWY2;A0A0S2Z3S5;A0A0S2Z3H8;P63092;Q5JWF2;B0AZR9;Q14455;A0A0A0MR13;O60726;Q8N2B4;A8K1Y9;P38405;O75633;O75632;B4DHG7;S4R3E3;Q5JWE9;H0Y7F4;A0A1W2PRE1;A2A2R6;A0A1W2PQK2;A0A087WTB6;Q5JWD1;H0Y7E8;A0A1W2PRJ7;S4R3V9;A0A087WZE5;K7EQ80;A0A1W2PS82;K7EPE2;A0A024R2Z1;Q5T697;P11488;P19087;A8MTJ3	Q5FWY2;A0A0S2Z3S5;A0A0S2Z3H8;P63092;Q5JWF2;B0AZR9;Q14455;A0A0A0MR13;O60726	Guanine nucleotide-binding protein G(s) subunit alpha isoforms short;Guanine nucleotide-binding protein G(s) subunit alpha isoforms XLas	GNAS;GSA
NaN	26.7149	NaN	NaN	NaN	NaN	NaN	NaN	NaN	2	8	31.117	209900000	4	A0A0S2Z3K4;J3QTA2;Q99933;A0A0U1RR89;C9JYK5	A0A0S2Z3K4;J3QTA2;Q99933;A0A0U1RR89;C9JYK5	BAG family molecular chaperone regulator 1	BAG1
32.1226	31.9879	32.0793	32.2138	32.2187	32.2426	31.8323	31.758	31.9415	13	59.2	35.079	37195000000	89	A0A0S2Z3L0;P13804;A0A0S2Z3M4;H0YLU7;H0YK49;H0YNX6;H0YL12;H0YKF0;H0YL83;H0YM12;J3KN60	A0A0S2Z3L0;P13804;A0A0S2Z3M4;H0YLU7;H0YK49;H0YNX6;H0YL12;H0YKF0	Electron transfer flavoprotein subunit alpha, mitochondrial	ETFA
32.1867	32.2872	32.314	32.3167	32.4876	32.5787	32.4515	32.4963	32.5806	28	32.1	114.76	47982000000	258	A0A0S2Z3L2;P16615;H7C5W9;Q8N3X5;Q7Z675;Q7Z6E5;O14983;J3QSY6;A0A0S2Z3H0;A0A0S2Z425;H3BVB2;H3BTW4;B3KS35	A0A0S2Z3L2;P16615;H7C5W9	Sarcoplasmic/endoplasmic reticulum calcium ATPase 2	ATP2A2
27.138	27.1004	27.4207	27.394	27.473	27.4987	27.2704	27.1111	27.286	5	21.3	47.485	1387000000	11	A0A0S2Z3P9;P45954	A0A0S2Z3P9;P45954	Short/branched chain specific acyl-CoA dehydrogenase, mitochondrial	ACADSB
28.7812	28.5823	28.7389	28.7541	28.3523	28.5124	28.69	28.6282	28.4145	10	43.4	33.83	3459900000	48	L7RT18;A0A0S2Z3Q4;P46108	L7RT18;A0A0S2Z3Q4;P46108	Adapter molecule crk	CRK
30.2536	30.0079	31.1232	30.8183	30.8521	30.6957	30.2085	30.6554	30.8133	5	39.7	21.445	13871000000	49	A0A0S2Z3W7;Q9BY32;A0A0S2Z423;Q5NT82	A0A0S2Z3W7;Q9BY32	Inosine triphosphate pyrophosphatase	ITPA
30.4256	30.382	30.4052	30.5319	30.3323	30.4569	30.2566	30.1215	30.2996	20	74.9	50.582	11561000000	109	A0A0S2Z3X8;P31150;B4DHX4;B4DH24;B4E070;G5E9U5;A0A0S2Z426	A0A0S2Z3X8;P31150;B4DHX4	Rab GDP dissociation inhibitor alpha	GDI1
28.1603	28.4589	28.3273	28.3707	28.3409	28.5962	28.6594	28.5434	28.4428	7	21	58.259	3045800000	38	A0A0S2Z444;A0A0S2Z3Y3;A0A0S2Z3Z1;A0A0S2Z462;P52594;A0A024R458;B8ZZY2;C9J2I0;B4DHC5	A0A0S2Z444;A0A0S2Z3Y3;A0A0S2Z3Z1;A0A0S2Z462;P52594;A0A024R458;B8ZZY2;C9J2I0;B4DHC5	Arf-GAP domain and FG repeat-containing protein 1	AGFG1;HRB
NaN	NaN	NaN	NaN	NaN	NaN	NaN	24.2792	NaN	2	9.4	37.919	112090000	7	D3DRM8;B2RAT6;A0A0S2Z3Y7;P07902;P78433	D3DRM8;B2RAT6;A0A0S2Z3Y7;P07902;P78433	Galactose-1-phosphate uridylyltransferase	hCG_2040046;GALT
27.5761	NaN	26.5599	26.3825	NaN	26.4048	NaN	NaN	NaN	2	23.8	16.022	652870000	16	A0A0S2Z469;B5MC53;B5MCF8;A0A0S2Z3Z9;P39210;G5E9F5;C9J473;A8MPV4;H0Y6M5;E7EX18	A0A0S2Z469;B5MC53;B5MCF8;A0A0S2Z3Z9;P39210;G5E9F5;C9J473;A8MPV4;H0Y6M5;E7EX18	Protein Mpv17	MPV17
32.642	32.4551	32.5386	32.578	32.4039	32.4543	32.3811	32.3463	32.4223	17	88.1	26.923	50161000000	150	A0A0S2Z410;Q99714;Q5H928;A0A0S2Z434	A0A0S2Z410;Q99714;Q5H928;A0A0S2Z434	3-hydroxyacyl-CoA dehydrogenase type-2	HSD17B10
28.138	28.3163	28.1522	28.029	28.2567	27.7841	27.514	27.3588	27.5899	5	25.1	20.108	2145000000	16	A0A0S2Z433;O43181;H0Y9M8	A0A0S2Z433;O43181;H0Y9M8	NADH dehydrogenase [ubiquinone] iron-sulfur protein 4, mitochondrial	NDUFS4
27.6461	27.8198	27.9106	28.163	27.7788	27.8004	27.9095	27.9725	27.8843	6	19.2	48.959	2059400000	35	A0A0S2Z470;Q96FT4;A0A0S2Z456;Q92733;A0A0S2Z483;H0YE12;H0Y679	A0A0S2Z470;Q96FT4;A0A0S2Z456;Q92733;A0A0S2Z483	Proline-rich protein PRCC	PRCC
NaN	NaN	NaN	NaN	NaN	NaN	NaN	25.2809	NaN	4	13.9	40.921	245540000	3	B4DS19;B4DWW0;B4DR50;A0A0S2Z4F3;A0A0S2Z480;A0A0S2Z4H1;B4E0T2;P50542;H0YGT8	B4DS19;B4DWW0;B4DR50;A0A0S2Z4F3;A0A0S2Z480;A0A0S2Z4H1;B4E0T2;P50542	Peroxisomal targeting signal 1 receptor	PEX5
32.0404	31.9996	32.0388	32.1499	32.1295	32.0799	32.0365	32.0727	32.1059	28	58.6	52.904	37855000000	211	A0A0S2Z489;O00232;A0A0S2Z476;J3KTJ5;J3KSK1	A0A0S2Z489;O00232;A0A0S2Z476	26S proteasome non-ATPase regulatory subunit 12	PSMD12
35.6788	35.5391	35.6541	35.5971	35.7005	35.6015	35.7716	35.7948	35.7803	10	54.7	29.464	466010000000	212	A0A0S2Z4G7;A0A0S2Z491;P06748;A0A140VJQ2;A4ZU86;Q9BTI9;Q9NX34;E5RI98	A0A0S2Z4G7;A0A0S2Z491;P06748;A0A140VJQ2;A4ZU86;Q9BTI9	Nucleophosmin	NPM1
26.5843	NaN	NaN	NaN	NaN	NaN	NaN	NaN	NaN	4	52.2	32.806	352060000	5	A0A0S2Z497;P40855;B7Z6I5;Q5QNY5;H0YJ60;H0YDY4;B7Z8B3;E9PS71	A0A0S2Z497;P40855;B7Z6I5;Q5QNY5;H0YJ60	Peroxisomal biogenesis factor 19	PEX19
33.4165	33.395	33.4798	33.4786	33.4769	33.538	33.5749	33.5082	33.5145	43	60.4	81.307	101170000000	410	A0A0S2Z4A5;P33993;C6EMX8;B2RBA6;B4DDF5;B3KUD7;Q9H4N9;C9J8M6;A0A0S2Z441	A0A0S2Z4A5;P33993;C6EMX8;B2RBA6;B4DDF5;B3KUD7	DNA replication licensing factor MCM7;DNA helicase	MCM7
26.3675	26.5484	26.7246	NaN	26.6812	26.9545	26.5189	NaN	NaN	3	8.8	57.658	877930000	6	A0A0S2Z4B5;A0A0S2Z4C6;Q08209;E9PPC8;E9PK68;Q9UMM5;E7ETC2	A0A0S2Z4B5;A0A0S2Z4C6;Q08209	Serine/threonine-protein phosphatase 2B catalytic subunit alpha isoform	PPP3CA
33.2642	33.1755	33.3116	33.2313	33.154	33.3105	33.2207	33.2741	33.3177	18	56.1	54.636	86514000000	183	A0A0S2Z4C3;P07954;A0A0S2Z3W2;A0A0S2Z3X6;A0A0S2Z4H0;A0A0S2Z3S9;A0A0S2Z408	A0A0S2Z4C3;P07954	Fumarate hydratase, mitochondrial	FH
31.1962	31.0901	31.0847	31.4251	31.2566	31.4502	31.3098	31.3011	31.1177	25	43.1	79.685	21517000000	141	A0A0S2Z4J1;P51659;B2R659;E7EWE5;B4DDM5;G5E9S2;B3KSP2;E7ET17;Q59H27;E7EPL9;E7ER27;A0A0S2Z4Q6;A0A0S2Z460;Q9UBA4	A0A0S2Z4J1;P51659;B2R659;E7EWE5;B4DDM5;G5E9S2;B3KSP2;E7ET17;Q59H27;E7EPL9;E7ER27	Peroxisomal multifunctional enzyme type 2;(3R)-hydroxyacyl-CoA dehydrogenase;Enoyl-CoA hydratase 2	HSD17B4
NaN	24.9657	NaN	NaN	NaN	NaN	NaN	NaN	NaN	3	30.6	14.02	220110000	12	B7Z419;B7Z6A1;Q59F02;H3BV55;B2R6D4;A0A0S2Z4J6;O15305;B7Z922;H3BRM0;H3BPH4	B7Z419;B7Z6A1;Q59F02;H3BV55;B2R6D4;A0A0S2Z4J6;O15305;B7Z922;H3BRM0	Phosphomannomutase;Phosphomannomutase 2	PMM2
24.6239	24.5841	24.9308	25.0584	25.3122	25.143	25.0839	24.9326	24.9278	2	3.7	72.48	274390000	11	Q9NSD0;Q16519;A0A0S2Z4K3;A0A0S2Z4L3;P07225;Q16441;H7BXT0;B4E1L6;G5E9F8	Q9NSD0;Q16519;A0A0S2Z4K3;A0A0S2Z4L3;P07225;Q16441;H7BXT0;B4E1L6;G5E9F8	Vitamin K-dependent protein S	PROS1
26.7955	26.7375	26.5668	26.614	26.4855	NaN	26.4902	26.6649	26.5886	4	10.1	69.513	840670000	13	A0A0S2Z4L5;L7RRS6;A0A0S2Z559;P04049;B4E1N6;H7C155;B4E0X2;D7PBN3;C7TPG7;A0A0B4J1W9	A0A0S2Z4L5;L7RRS6;A0A0S2Z559;P04049;B4E1N6;H7C155;B4E0X2;D7PBN3;C7TPG7	RAF proto-oncogene serine/threonine-protein kinase	RAF1;SRGAP3:RAF1
NaN	NaN	NaN	NaN	NaN	NaN	26.2274	25.8119	NaN	3	16.8	42.915	393470000	3	A0A0S2Z4M6;O43639;Q53TG4	A0A0S2Z4M6;O43639;Q53TG4	Cytoplasmic protein NCK2	NCK2
26.8748	27.6864	27.8254	27.6771	27.7505	26.5023	26.5527	26.5147	26.4692	4	24	25.854	1301300000	15	A0A0S2Z4N4;A0A0S2Z4P0;P50479;C9J542	A0A0S2Z4N4;A0A0S2Z4P0;P50479	PDZ and LIM domain protein 4	PDLIM4
27.9268	28.3006	27.9683	27.6235	27.6073	28.295	28.5674	28.5936	28.494	8	16.9	74.854	2579100000	29	B4E1E2;A0A0S2Z4Q4;A0A0S2Z4R4;O14964;B4DFP5;I3L1P5;I3L165;I3L2H4;I3L1E3	B4E1E2;A0A0S2Z4Q4;A0A0S2Z4R4;O14964;B4DFP5;I3L1P5	Hepatocyte growth factor-regulated tyrosine kinase substrate	HGS
33.6081	33.8937	33.878	34.2409	34.1151	34.2157	33.7225	33.6172	33.7624	31	58.7	59.143	134520000000	273	A0A0S2Z4R1;P54577;A0A0C4DGZ5;A0A0S2Z4P3	A0A0S2Z4R1;P54577;A0A0C4DGZ5	Tyrosine--tRNA ligase, cytoplasmic;Tyrosine--tRNA ligase, cytoplasmic, N-terminally processed;Tyrosine--tRNA ligase	YARS
27.0993	27.2646	27.4187	27.3097	27.4314	27.485	27.0922	27.1708	27.1509	4	16.9	35.873	1358200000	32	A0A0S2Z505;A0A0S2Z5F6;A0A0S2Z4R2;Q9H939	A0A0S2Z505;A0A0S2Z5F6;A0A0S2Z4R2;Q9H939	Proline-serine-threonine phosphatase-interacting protein 2	PSTPIP2
NaN	25.9377	NaN	NaN	NaN	NaN	NaN	NaN	25.2022	2	13.6	34.603	188750000	7	A0A0S2Z4R8;B7Z7P4;X5CKB3;B2R9F3;A0A1V0E3Y2;A0A1V0E3X9;A0A140T9T7;A0A0S2Z5A6;Q03518;Q6QWC1;Q6QWC0;A0A1V0E3X7;A0A1V0E3X4;A0A1V0E3W5	A0A0S2Z4R8;B7Z7P4;X5CKB3;B2R9F3;A0A1V0E3Y2;A0A1V0E3X9;A0A140T9T7;A0A0S2Z5A6;Q03518;Q6QWC1;Q6QWC0;A0A1V0E3X7;A0A1V0E3X4;A0A1V0E3W5	Antigen peptide transporter 1	TAP1
32.4596	32.361	32.4223	32.4465	32.4243	32.5485	32.4408	32.4296	32.3488	34	45.9	90.98	48341000000	266	Q53HJ4;B2R7C5;A0A0S2Z4T1;P25205;Q8NHX6;A0A0S2Z492;B4DUQ9;J3KQ69;B4DS46;Q7Z6P5	Q53HJ4;B2R7C5;A0A0S2Z4T1;P25205;Q8NHX6;A0A0S2Z492;B4DUQ9;J3KQ69;B4DS46	DNA helicase;DNA replication licensing factor MCM3	MCM3;HCC5
27.4558	27.7038	27.635	27.7385	27.7605	28.1591	27.8332	27.7363	27.9317	3	23.9	25.707	1928000000	16	A0A0S2Z5C5;A0A0S2Z4T8;P10746;A0A087WZB7;A0A087WUV7;A0A087X021;Q5T3L7;Q5T3L8;Q5T3L9	A0A0S2Z5C5;A0A0S2Z4T8;P10746	Uroporphyrinogen-III synthase	UROS
28.9499	28.9032	29.0393	29.0095	28.8603	28.8297	28.957	29.1387	29.1943	3	21.1	30.472	4470600000	20	A0A0S2Z4V5;A0A0S2Z556;O60828;H7C053;C9JQA1	A0A0S2Z4V5;A0A0S2Z556;O60828	Polyglutamine-binding protein 1	PQBP1
30.2082	30.3504	30.5047	30.4468	30.4067	30.5716	30.4302	30.4723	30.5166	10	15.3	102.33	12154000000	78	A0A0S2Z4W1;A9Z1X7;B7Z7U0;A0A0S2Z4Z6;Q8IYB3;E9PCT1;M0R088;M0R1E7;M0QXG5;B4DED5	A0A0S2Z4W1;A9Z1X7;B7Z7U0;A0A0S2Z4Z6;Q8IYB3;E9PCT1	Serine/arginine repetitive matrix protein 1	SRRM1
NaN	25.5123	NaN	NaN	25.0658	NaN	NaN	NaN	NaN	2	5.4	67.638	216460000	5	A0A0S2Z4W2;Q9H2C0;B3KTC3	A0A0S2Z4W2;Q9H2C0;B3KTC3	Gigaxonin	GAN
27.9812	27.8415	28.1899	27.9976	27.9464	27.9122	28.1045	27.8443	27.8795	2	24.8	10.978	2211400000	13	J3QS48;I3L295;J3KTK8;Q96N63;Q96K24;J3QQZ4;J3KT75;B4DMY7;J3QW43;J3QRD5;Q9H3L2;B2RB74;A0A0S2Z4W8;B4DLH7;Q1HDL3;O75352;J3KSI4;I3L405;I3L261;I3L1D2;A0A0S2Z4T4;I3L4E0	J3QS48;I3L295;J3KTK8;Q96N63;Q96K24;J3QQZ4;J3KT75;B4DMY7;J3QW43;J3QRD5;Q9H3L2;B2RB74;A0A0S2Z4W8;B4DLH7;Q1HDL3;O75352;J3KSI4;I3L405;I3L261;I3L1D2;A0A0S2Z4T4;I3L4E0	Mannose-P-dolichol utilization defect 1 protein	MPDU1;HBEBP2BPA
25.7881	25.6963	25.5015	25.029	25.4751	25.4949	26.0378	26.086	26.1107	2	12.3	35.567	467770000	13	B2RBC1;A0A0S2Z4X0;Q9Y4X0;B3KMF2;A0A0S2Z4V0;A0A024RAG1;Q6DCA0	B2RBC1;A0A0S2Z4X0;Q9Y4X0;B3KMF2;A0A0S2Z4V0;A0A024RAG1;Q6DCA0	AMME syndrome candidate gene 1 protein;AMMECR1-like protein	AMMECR1;MGC4268;AMMECR1L
26.7903	26.6755	26.748	26.9791	26.9458	27.1845	26.9949	26.9984	26.7789	6	17.2	42.906	1052400000	15	B2R6S4;A0A0S2Z4Y3;P16333;A0A0S2Z4E4;C9JVV5;H7C5C7;C9J869;A0A0S2Z4D7;C9JAB9;C9J0K5;C9K098;Q53T91;E7ERP6;E9PEE2;E7EPF5	B2R6S4;A0A0S2Z4Y3;P16333;A0A0S2Z4E4;C9JVV5;H7C5C7;C9J869;A0A0S2Z4D7;C9JAB9	Cytoplasmic protein NCK1	NCK1
29.3575	29.1376	29.4774	29.7139	29.5379	29.5897	29.5345	29.3383	29.3954	8	32.7	29.634	6238500000	77	A0A0S2Z4Y5;Q5QPK2;H0Y368;O60762;Q5QPJ9;A0A0S2Z4U1	A0A0S2Z4Y5;Q5QPK2;H0Y368;O60762;Q5QPJ9;A0A0S2Z4U1	Dolichol-phosphate mannosyltransferase subunit 1	DPM1
31.6042	31.2447	31.4552	31.5309	31.3187	31.3807	31.4761	31.2007	31.3227	14	26.3	69.491	23636000000	109	A0A0S2Z4Z0;Q96PK6;A0A0S2Z567;A0A0A6YYI9;A0A0S2Z5V2;F8WDX3;A0A0A0MSL8;B8ZZ74;Q59GV2;B4DNG4	A0A0S2Z4Z0;Q96PK6;A0A0S2Z567	RNA-binding protein 14	RBM14
25.6439	25.4102	25.5776	25.8101	25.725	25.8723	25.6126	25.3209	25.6196	5	15.2	61.065	434730000	13	B3KQM3;A0A0S2Z4Z8;O43353;Q2TU65	B3KQM3;A0A0S2Z4Z8;O43353;Q2TU65	Receptor-interacting serine/threonine-protein kinase 2	RIPK2
33.0949	33.3881	33.5131	33.4134	33.4515	33.6183	33.5114	33.6021	33.615	24	54.6	54.287	100340000000	303	A8K525;A0A0S2Z4Z9;Q15233;C9JYS8;C9IZL7;H7C367;C9J4X2;A0A0S2Z4E7	A8K525;A0A0S2Z4Z9;Q15233;C9JYS8;C9IZL7	Non-POU domain-containing octamer-binding protein	NONO
25.9518	26.5449	26.228	25.5964	25.4784	26.4027	26.6971	26.3162	26.6367	4	10.8	59.559	679550000	14	B7ZA56;B4E184;A0A0S2Z500;Q96CV9;A0A087WY28;A0A0S2Z5I6	B7ZA56;B4E184;A0A0S2Z500;Q96CV9;A0A087WY28;A0A0S2Z5I6	Optineurin	OPTN
30.9974	31.1642	30.9898	31.1067	31.0899	31.0146	31.47	31.1161	31.4946	8	49.4	20.913	20298000000	28	Q5JRI1;Q53GD7;A0A0S2Z504;O75494;Q8WXF0;B3KNY6	Q5JRI1;Q53GD7;A0A0S2Z504;O75494	Serine/arginine-rich splicing factor 10	SRSF10
25.6805	25.6197	25.8006	26.0646	26.5254	26.1352	25.6167	25.2944	NaN	3	9.4	61.147	479030000	8	A0A0S2Z527;Q53HP5;Q53H87;Q59G10;O75891;A0A077H423;Q9UFA9;A0A0S2Z586;B4DGC8;C9IZ36;C9JY00;C9JYZ6	A0A0S2Z527;Q53HP5;Q53H87;Q59G10;O75891;A0A077H423;Q9UFA9;A0A0S2Z586	Cytosolic 10-formyltetrahydrofolate dehydrogenase	ALDH1L1;DKFZp434O2417
26.8747	27.0239	27.234	26.3039	27.9679	27.8492	28.778	28.7154	29.2054	5	22.1	20.148	2324800000	19	A0A0S2Z5D2;Q53G62;A0A0S2Z563;A0A0S2Z5H0;Q9Y2Q9;H0YAT2;H7C5V3;E5RFT8;E5RGC7;E5RK86;E5RFH3;H0YC42;A5Y5A3	A0A0S2Z5D2;Q53G62;A0A0S2Z563;A0A0S2Z5H0;Q9Y2Q9;H0YAT2;H7C5V3	28S ribosomal protein S28, mitochondrial	MRPS28
31.3574	31.2978	31.3376	31.2015	30.8893	31.2568	31.4136	31.2501	31.4466	6	26	35.02	21932000000	60	K7EQ02;K7EQ55;K7EK33;A0A0S2Z569;Q96EP5;Q5IRN2;Q5IRM7	K7EQ02;K7EQ55;K7EK33;A0A0S2Z569;Q96EP5;Q5IRN2	DAZ-associated protein 1	DAZAP1;DAZAP1/MEF2D fusion
27.486	27.6733	27.7695	27.9965	27.7191	28.2133	28.2251	27.7552	28.1333	9	20.1	70.584	2096300000	18	A0A0S2Z577;Q9H267;B7Z6M7;F5H008;B7Z1N4;A0A0S2Z555;G3V3F9	A0A0S2Z577;Q9H267;B7Z6M7;F5H008;B7Z1N4	Vacuolar protein sorting-associated protein 33B	VPS33B
28.5328	28.5961	28.6662	29.0269	29.2693	28.4932	28.1583	28.2266	28.3106	11	45	35.386	3441300000	40	A0A0S2Z583;Q8TC12;A0A0S2Z575;G3V2G6;G3V234;B3KQ19;H0YJ46;H0YIZ8;H0YJ10	A0A0S2Z583;Q8TC12;A0A0S2Z575;G3V2G6;G3V234;B3KQ19;H0YJ46;H0YIZ8	Retinol dehydrogenase 11	RDH11
29.2551	29.1961	29.5263	29.045	28.8105	28.9205	29.3849	29.1545	29.1443	6	63.9	15.179	5116900000	33	A0A0S2Z590;O15116;E5RJ47;E5RH18	A0A0S2Z590;O15116	U6 snRNA-associated Sm-like protein LSm1	LSM1
26.8169	26.8381	27.1668	27.3275	27.434	27.4311	27.3574	26.8761	27.2429	4	23.3	31.62	1271600000	19	A0A0S2Z591;O00165;A0A0S2Z565;Q5VYD6;A0A0S2Z519;E9PIQ7	A0A0S2Z591;O00165;A0A0S2Z565;Q5VYD6;A0A0S2Z519	HCLS1-associated protein X-1	HAX1
26.5928	25.1978	26.3618	25.7234	25.4917	25.6006	NaN	NaN	26.7651	3	20.7	24.956	536540000	12	B2RCZ7;A0A0S2Z5B3;M0QXB5;O95571;A0A0S2Z580;M0QY80	B2RCZ7;A0A0S2Z5B3;M0QXB5;O95571;A0A0S2Z580	Persulfide dioxygenase ETHE1, mitochondrial	ETHE1
28.1047	27.9356	27.721	27.6909	27.7142	27.8929	28.0491	27.9897	27.8548	12	32	50.462	2081400000	39	A0A0S2Z5B8;A0A0S2Z5D4;Q9UJW0;H9KVE0;E5RK21;B4DS07;E5RGG1;B4DL03;A0A0S2Z5D5;E5RI97;Q9NSJ5	A0A0S2Z5B8;A0A0S2Z5D4;Q9UJW0	Dynactin subunit 4	DCTN4
27.0678	26.8761	27.0685	26.9075	27.3056	27.0983	26.8738	26.9297	27.5722	7	19.4	43.963	1248500000	32	A0A0S2Z5C3;Q9NWT1	A0A0S2Z5C3;Q9NWT1	p21-activated protein kinase-interacting protein 1	PAK1IP1
NaN	NaN	NaN	NaN	NaN	NaN	NaN	26.5491	NaN	4	16.6	39.095	751510000	2	A0A0S2Z5D6;Q8WTS1;F6K7K5;F6K7K3;H7BZY9	A0A0S2Z5D6;Q8WTS1;F6K7K5;F6K7K3	1-acylglycerol-3-phosphate O-acyltransferase ABHD5	ABHD5
27.9494	27.629	27.6663	27.4092	27.4924	27.5853	27.4244	27.754	27.9002	9	21.9	60.618	1774200000	20	A0A0S2Z5E9;Q69YN2;X6R7M0;D3DR67	A0A0S2Z5E9;Q69YN2	CWF19-like protein 1	CWF19L1
29.5194	29.6329	29.7136	29.8578	29.7305	29.8099	29.6344	29.5973	29.6585	14	47.2	35.379	7199600000	51	B4DY59;E9PF19;A0A0S2Z5F3;Q8N2L6;B2RB52;Q9Y4P3;B4DY50;Q96E41;A0A0S2Z5C1;A0A087WXC6	B4DY59;E9PF19;A0A0S2Z5F3;Q8N2L6;B2RB52;Q9Y4P3;B4DY50;Q96E41	Transducin beta-like protein 2	TBL2
29.5624	29.7453	29.6422	29.7753	29.6134	29.7173	29.7116	29.81	29.5709	10	21.3	70.294	7223600000	67	A0A0S2Z5H3;A0A0S2Z4Y4;Q14677	A0A0S2Z5H3;A0A0S2Z4Y4;Q14677	Clathrin interactor 1	CLINT1
25.2113	25.1678	NaN	25.4203	25.7726	25.8624	25.4208	25.5878	25.5041	3	19.7	16.733	399220000	4	C9JF50;E9PLU1;E9PRK5;B3KPT5;B2RAQ5;A0A0S2Z5H6;B4DRE5;Q9H019;E9PPQ0;E9PPF9;E9PLD2;E9PRW1;E9PSD6	C9JF50;E9PLU1;E9PRK5;B3KPT5;B2RAQ5;A0A0S2Z5H6;B4DRE5;Q9H019;E9PPQ0;E9PPF9;E9PLD2	Mitochondrial fission regulator 1-like	MTFR1L
31.1536	31.2697	31.4138	31.3132	31.2597	31.3306	31.4009	31.3816	31.4852	22	67	46.254	22687000000	160	B3KM48;A0A0S2Z5H7;Q9BT78;Q53FV3;D6RFN0;D6RAX7;D6RD63;D6REK7	B3KM48;A0A0S2Z5H7;Q9BT78;Q53FV3;D6RFN0;D6RAX7;D6RD63	COP9 signalosome complex subunit 4	COPS4
30.2773	29.9939	30.3258	30.3559	30.2621	30.3195	30.2129	30.1861	30.1921	18	21	121.32	10588000000	69	A0A0S2Z5J4;O00203;A8K586;Q3MNE1;A0A0S2Z4Z4;B4E0B2;Q68CN5;Q13367;B3KUS4;F5GYB0;B4DFZ2;H0YBD0;F5GWU4	A0A0S2Z5J4;O00203;A8K586;Q3MNE1;A0A0S2Z4Z4;B4E0B2	AP-3 complex subunit beta-1;AP-3 complex subunit beta	AP3B1
26.693	26.2507	26.3094	26.2383	26.1576	26.1269	26.2749	26.5182	26.8264	5	12.6	66.017	749690000	15	Q53H36;A0A0S2Z5J9;Q96SZ6;A0A0S2Z592;B4DI01;H0Y721	Q53H36;A0A0S2Z5J9;Q96SZ6;A0A0S2Z592;B4DI01;H0Y721	CDK5 regulatory subunit-associated protein 1	CDK5RAP1
28.6017	28.5933	28.6175	28.5729	28.2722	28.3317	28.4345	28.4692	28.7431	4	11.7	59.488	3235500000	26	A0A0S2Z5K3;Q3LIB4;A0A0S2Z5R3;Q9NPI6;A0A087WT55;A0A0S2Z5I2;A0A087WVE6	A0A0S2Z5K3;Q3LIB4;A0A0S2Z5R3;Q9NPI6;A0A087WT55;A0A0S2Z5I2	mRNA-decapping enzyme 1A	Nbla00360;DCP1A
NaN	NaN	NaN	25.8049	NaN	NaN	NaN	NaN	NaN	2	7.6	44.512	280000000	1	A0A0S2Z5K6;A0A0S2Z6B4;D6REA1;Q9H173;D6RIU8	A0A0S2Z5K6;A0A0S2Z6B4;D6REA1;Q9H173;D6RIU8	Nucleotide exchange factor SIL1	SIL1
29.4617	29.4403	29.6141	29.7798	29.5922	29.9603	29.8688	29.8201	29.9037	15	29.7	72.131	7423700000	73	A0A0S2Z5K8;V9HWK4;Q96SI9	A0A0S2Z5K8;V9HWK4;Q96SI9	Spermatid perinuclear RNA-binding protein	HEL162;STRBP
27.2728	27.4276	27.5389	27.3819	27.2888	27.6243	27.5977	27.6804	27.7404	8	40.3	24.534	1604800000	19	A0A0S2Z5L0;A0A0S2Z5P2;Q9BRX5;A0A0S2Z5L4;A0A0S2Z5L3	A0A0S2Z5L0;A0A0S2Z5P2;Q9BRX5;A0A0S2Z5L4	DNA replication complex GINS protein PSF3	GINS3
28.8	28.7385	28.8531	28.498	28.5244	28.6404	28.5787	28.889	28.5392	11	24.1	75.573	3636600000	64	B4DRU9;A0A0S2Z5L1;Q9NUQ8;A0A0S2Z645;F8WCU6	B4DRU9;A0A0S2Z5L1;Q9NUQ8	ATP-binding cassette sub-family F member 3	ABCF3
22.9164	24.2378	23.9475	NaN	NaN	NaN	24.0245	23.7357	NaN	3	6.9	49.6	98856000	8	A0A0S2Z5V5;A0A0S2Z5L8;Q9H7H0;G3V4P2;G3V3X6;G3V353;G3V4H5;H0YJW1;B4E298;B4E0Q8	A0A0S2Z5V5;A0A0S2Z5L8;Q9H7H0;G3V4P2;G3V3X6;G3V353;G3V4H5	Methyltransferase-like protein 17, mitochondrial	METTL17
30.8618	30.6865	30.7262	30.9128	30.6869	31.007	30.7649	30.6161	30.7042	20	26.7	87.998	15419000000	154	B3KQF0;A0A0S2Z5M1;Q9UGP8;B3KNE7;B3KWU4;A0A0S2Z518;A6PVC9	B3KQF0;A0A0S2Z5M1;Q9UGP8;B3KNE7;B3KWU4	Translocation protein SEC63 homolog	SEC63
29.9604	29.7104	29.9811	29.8509	29.6488	29.9303	30.3849	30.2897	30.5042	22	44.8	90.6	9584200000	87	B4DT15;A0A0S2Z5M8;Q9BQ52;G5E9D5;B3KT00;B3KSU9;B4E365;E7ES68;H7C2I4;V9GYS7;J3QRS2;V9GYU5;J3QL08;V9GZ72;Q9HAS7;J3QLK4	B4DT15;A0A0S2Z5M8;Q9BQ52;G5E9D5;B3KT00;B3KSU9;B4E365;E7ES68	Zinc phosphodiesterase ELAC protein 2	ELAC2
28.9802	28.9424	29.157	29.1782	29.0561	29.0089	29.1341	29.1902	28.939	12	43.1	40.62	4728600000	62	A0A0S2Z5M9;Q6P1J9;A0A0S2Z5N1;A0A1B0GUB2;B4DV47	A0A0S2Z5M9;Q6P1J9;A0A0S2Z5N1;A0A1B0GUB2	Parafibromin	CDC73
32.0691	31.8401	31.7521	31.7819	NaN	31.4587	31.7829	31.616	31.5147	8	18.8	72.748	27938000000	18	A0A0S2Z5P5;Q9BTE3;A0A0S2Z614	A0A0S2Z5P5;Q9BTE3	Mini-chromosome maintenance complex-binding protein	MCMBP
NaN	25.8006	25.9992	26.119	NaN	26.2958	25.8565	25.9493	25.7898	4	25.9	26.239	558400000	6	B3KVZ3;A0A0S2Z5T0;Q9H3R5;H0Y9E6;D6RBJ6	B3KVZ3;A0A0S2Z5T0;Q9H3R5;H0Y9E6	Centromere protein H	CENPH
29.084	29.328	29.517	29.3327	29.4439	29.6242	29.598	29.2801	29.4898	8	55.6	19.856	6004800000	55	A0A0S2Z5U1;Q8N183;A0A0S2Z5U2;D6RA56;A0PJB9;A0A0S2Z5T4;H0YA50	A0A0S2Z5U1;Q8N183;A0A0S2Z5U2	Mimitin, mitochondrial	NDUFAF2
31.6706	31.6296	31.8345	31.8815	31.9653	31.9432	31.9331	31.776	32.0183	14	52.2	33.637	33110000000	129	A0A0S2Z5U6;Q96C36;A0A087WTV6;A0A024R3Q9;J3KR12;B4DQK8;A0A087WZR9;Q8NCZ0;B3KMB7;Q4W8W1;A0A087WX69;A0A0S2Z578;A0A087WZF0	A0A0S2Z5U6;Q96C36;A0A087WTV6;A0A024R3Q9;J3KR12;B4DQK8;A0A087WZR9	Pyrroline-5-carboxylate reductase 2;Pyrroline-5-carboxylate reductase	PYCR2
30.1256	30.3303	30.2385	30.4261	30.4569	30.0579	30.0272	29.6778	30.2702	7	45.2	21.232	10218000000	59	Q502X2;A0A0S2Z5U7;Q9NR28;A0A024RBT2;F5H796;H7BZK7;A0A0S2Z5P6;Q53HB7;F5GXT8;K7X1S0;F5H0Q4;F5GYH3;F5GX50;H7BZQ7	Q502X2;A0A0S2Z5U7;Q9NR28;A0A024RBT2;F5H796;H7BZK7;A0A0S2Z5P6;Q53HB7	Diablo homolog, mitochondrial	DIABLO
26.4815	26.3709	NaN	26.7708	26.4851	26.5153	26.2047	NaN	NaN	2	9	41.488	747870000	6	A0A0S2Z5V7;Q8TCT9;A0A075B6F6;A0A0S2Z6F0	A0A0S2Z5V7;Q8TCT9;A0A075B6F6;A0A0S2Z6F0	Minor histocompatibility antigen H13	HM13
28.2238	28.3493	28.5768	28.6013	28.6296	29.1555	28.7045	28.3958	28.7297	3	41.4	12.498	3457700000	15	A0A0S2Z5X1;Q96DA6;G5E9V2;F2Z3A7	A0A0S2Z5X1;Q96DA6	Mitochondrial import inner membrane translocase subunit TIM14	DNAJC19
26.1646	26.1777	25.9894	25.5722	26.0066	25.9213	26.3158	26.2075	25.8929	3	10.1	45.112	580170000	9	V9GY48;H0UI99;H0UI97;A0A0S2Z5X3;A0A0S2Z6H0;Q8N5A5;A0A0J9YYD9	V9GY48;H0UI99;H0UI97;A0A0S2Z5X3;A0A0S2Z6H0;Q8N5A5	Zinc finger CCCH-type with G patch domain-containing protein	ZGPAT
NaN	NaN	NaN	NaN	NaN	NaN	25.6259	NaN	NaN	2	12.3	29.15	254690000	5	A0A0S2Z643;A0A0S2Z5Y7;Q8NFG4;C9J4C4	A0A0S2Z643;A0A0S2Z5Y7;Q8NFG4;C9J4C4	Folliculin	FLCN
26.5694	27.1629	27.4305	27.2519	26.813	27.4966	27.2046	27.2029	27.0245	7	12.9	86.343	1238000000	18	A0A0S2Z652;P83436;B3KSN1;A0A0S2Z604;Q6ZNT4	A0A0S2Z652;P83436;B3KSN1	Conserved oligomeric Golgi complex subunit 7	COG7
28.3437	28.5237	28.5615	28.7717	28.8177	28.8313	28.1298	28.2746	28.3342	12	27.6	80.472	3244100000	41	A0A0S2Z693;Q96RQ3;E9PHF7;Q68D27;F5GYT8;B4DH16;E9PG35;G5E9X5;B4DHW5;B7ZAW3;F8WDI3	A0A0S2Z693;Q96RQ3;E9PHF7;Q68D27;F5GYT8;B4DH16;E9PG35;G5E9X5;B4DHW5	Methylcrotonoyl-CoA carboxylase subunit alpha, mitochondrial	MCCC1;DKFZp686B20267
29.5817	29.8011	29.8442	29.9411	29.7919	30.0941	29.8092	29.8214	29.8664	15	43.9	60.099	8079500000	84	D6W592;A0A0S2Z6K1;Q8WVV9;B7WPG3;C9IYN3;A8K894;A0A0S2Z5U3;A0A0S2Z610;H7BXH8;H7C464;C9JJZ7	D6W592;A0A0S2Z6K1;Q8WVV9;B7WPG3;C9IYN3;A8K894;A0A0S2Z5U3;A0A0S2Z610	Heterogeneous nuclear ribonucleoprotein L-like	HNRPLL;HNRNPLL
NaN	25.9957	26.0541	NaN	26.0305	26.0651	26.4198	NaN	25.8767	2	23.8	13.321	507050000	9	A0A0S2Z6M2;Q8WUR7;A0A0S2Z5W1;H3BQZ5;H0Y996;H3BMR1	A0A0S2Z6M2;Q8WUR7;A0A0S2Z5W1;H3BQZ5;H0Y996;H3BMR1	UPF0235 protein C15orf40	C15orf40
26.8123	27.0881	27.4951	27.7075	27.4767	27.2954	26.0665	27.0123	27.034	5	5.5	195.27	1259400000	28	A0A0U1RQK7;Q59GJ0;A0A0A0MSA7;O43432;B4DZE1;B4DH17;B4DXR2	A0A0U1RQK7;Q59GJ0;A0A0A0MSA7;O43432;B4DZE1;B4DH17	Eukaryotic translation initiation factor 4 gamma 3	EIF4G3
28.7651	28.6099	28.6516	28.7089	28.8122	28.8472	28.8486	28.6289	28.6903	10	17.5	104.11	3728800000	62	A0A0U1RQQ9;Q6P3W7;F8VSC5;Q9NWE9;F8VPW3;H0YIK6	A0A0U1RQQ9;Q6P3W7;F8VSC5	SCY1-like protein 2	SCYL2
26.2892	NaN	NaN	NaN	NaN	NaN	NaN	NaN	NaN	2	3	104.83	628370000	5	A8K2M7;Q05C90;H3BTW5;A0A0U1RR27;Q7Z401;B7Z5Y3	A8K2M7;Q05C90;H3BTW5;A0A0U1RR27;Q7Z401;B7Z5Y3	C-myc promoter-binding protein	DENND4A
NaN	25.5379	24.8296	25.7965	26.3646	25.3455	NaN	NaN	NaN	5	8.6	68.571	410340000	13	B4DG57;A0A0U1RRH6;O94880	B4DG57;A0A0U1RRH6;O94880	PHD finger protein 14	PHF14
NaN	NaN	NaN	24.6626	NaN	NaN	NaN	NaN	NaN	3	6.9	54.578	83370000	6	F6XEV2;A0A0U1RRK1;Q9BPX6;S4R3W3;S4R3D7;E9PQV6;S4R3V1	F6XEV2;A0A0U1RRK1;Q9BPX6;S4R3W3;S4R3D7;E9PQV6;S4R3V1	Calcium uptake protein 1, mitochondrial	MICU1
34.0282	34.1341	34.18	34.211	34.0958	34.1264	33.9722	34.0865	34.1161	23	63.4	62.463	155300000000	259	A0A0U1RRM4;P26599;A6NLN1;K7EKJ7;Q59H49;A0A0D9SF20;K7EK45;K7ES59;K7ELW5;A0A087WU68;A0A087WUW5;K7EKX4	A0A0U1RRM4;P26599;A6NLN1;K7EKJ7;Q59H49	Polypyrimidine tract-binding protein 1	PTBP1
26.7948	27.0786	26.7738	27.0521	27.0618	26.1838	27.0342	26.8957	26.6626	7	16	55.726	1019200000	29	A0A0U4CQG9;J3QLS6;C9JHS6;B7Z8Z9;C9JIJ1;A0A0A0MRF1;J3KRI8;A0A1B0GXA2;A8MX96;E7EVP8;M0QZK3;C9JC83;C9J258;J3KSY8;M0R275;Q6P4H3;J3KTP4;C9JIF6	A0A0U4CQG9;J3QLS6;C9JHS6;B7Z8Z9;C9JIJ1;A0A0A0MRF1;J3KRI8;A0A1B0GXA2;A8MX96;E7EVP8;M0QZK3		AKT2
28.2971	26.7358	26.727	25.4906	25.3499	25.5736	28.4769	25.5743	25.569	6	14	70.038	1101300000	17	A0A0X1KG71;Q8WX92	A0A0X1KG71;Q8WX92	Negative elongation factor B	NELFB
NaN	23.9663	NaN	22.8779	25.5517	NaN	NaN	NaN	NaN	3	4.7	71.854	96971000	3	A0A0Y0BS51;A0A172Q398;A0A024R2T5;Q9H5V8	A0A0Y0BS51;A0A172Q398;A0A024R2T5;Q9H5V8	CUB domain-containing protein 1	CDCP1
33.3522	33.5517	33.4058	33.3815	33.4031	33.4822	33.5236	33.5978	33.4842	14	59.3	26.425	99244000000	129	Q5U0A0;A0A109NGN6;P28066	Q5U0A0;A0A109NGN6;P28066	Proteasome subunit alpha type;Proteasome subunit alpha type-5	PSMA5
27.1383	26.9407	26.6618	26.6209	26.6155	26.553	26.5192	26.5633	26.5213	2	27.1	15.348	919580000	19	E9PJL7;A0A140G961;E9PR44;V9HW27;P02511;E9PRS4;E9PS12;E9PNH7;A0A024R3B9;E9PRA8;B4DIA6;C3VMY8	E9PJL7;A0A140G961;E9PR44;V9HW27;P02511;E9PRS4;E9PS12;E9PNH7;A0A024R3B9;E9PRA8;B4DIA6;C3VMY8	Alpha-crystallin B chain	CRYAB;HEL-S-101
28.3058	28.1721	28.2031	28.3503	28.4419	28.261	28.5183	28.727	28.3874	5	23.3	21.701	2956200000	17	A0A140GX63;P13224;A0A140GX60;A0A140GX61;A0A140GX62	A0A140GX63;P13224;A0A140GX60	Platelet glycoprotein Ib beta chain	GP1BB
NaN	24.5906	25.3124	25.2962	NaN	25.2988	NaN	NaN	NaN	3	15.9	27.85	223950000	9	Q5JNW7;A0A140T998;Q6FHU0;X5D2R7;X5CMJ9;P28062;B7Z6U7	Q5JNW7;A0A140T998;Q6FHU0;X5D2R7;X5CMJ9;P28062	Proteasome subunit beta type;Proteasome subunit beta type-8	PSMB8;PSM8
25.8463	26.342	26.5086	26.1804	26.8744	26.1194	25.9895	25.7432	25.9126	2	10.9	28.629	641770000	13	A0A140T9D0;Q8NBI6	A0A140T9D0;Q8NBI6	Xyloside xylosyltransferase 1	XXYLT1
27.8164	28.2013	27.9594	28.0193	28.0371	28.0351	28.3515	28.1506	28.2645	4	21.8	38.018	2415300000	28	A0A140TA76;Q8ND56;K7EMZ9;A0A0G2JQ95;A0A096LP11	A0A140TA76;Q8ND56;K7EMZ9;A0A0G2JQ95;A0A096LP11	Protein LSM14 homolog A	LSM14A
30.4506	28.7011	29.9141	29.0943	28.4157	28.9374	29.8928	29.5979	30.3564	7	42.4	24.737	7120600000	47	A0A140VJC9;O95372;Q5QPQ0;Q5QPQ1;Q5QPN9;Q5QPQ3;Q5QPQ2;Q5QPN5	A0A140VJC9;O95372;Q5QPQ0;Q5QPQ1	Acyl-protein thioesterase 2	LYPLA2
29.0357	29.1743	28.8201	28.4027	28.487	28.4878	28.9702	29.0387	28.7984	9	21.2	70.86	3982800000	38	A0A140VJD0;Q9UFC0;F8WDB4;Q59FT0;H7C5S6	A0A140VJD0;Q9UFC0	Leucine-rich repeat and WD repeat-containing protein 1	LRWD1
30.2726	30.4718	30.3367	30.2313	30.1486	30.2831	30.3327	30.2349	30.2569	15	42.6	38.737	10965000000	88	Q86U79;A0A140VJE0;P55263	Q86U79;A0A140VJE0;P55263	Adenosine kinase	ADK
30.8256	30.8086	30.8071	30.6628	30.7447	30.7486	31.0609	31.3501	30.9323	15	42.9	52.891	16765000000	129	A0A140VJE3;P50579;F8VRR3;F8VQZ7;G3V1U3;B3KWL6;Q96B43;F8VY03;F8VSC4;F8VZX9	A0A140VJE3;P50579;F8VRR3;F8VQZ7;G3V1U3;B3KWL6	Methionine aminopeptidase 2;Methionine aminopeptidase	METAP2
29.212	28.9946	29.0846	29.2317	29.106	29.0319	29.2508	29.2378	29.0288	11	13.6	91.722	4933300000	33	A0A140VJE7;B3KXW5;O43747;Q8IY97;B4DS96;B4DDL1;H3BR36;H3BUN9;H3BNR4;B3KNW1;H3BS13;H3BV30;H3BRM7;H3BN71;B4DGE1	A0A140VJE7;B3KXW5;O43747;Q8IY97;B4DS96	AP-1 complex subunit gamma-1	AP1G1
30.7713	30.7789	30.7152	30.8157	30.6844	30.7812	30.8706	30.7816	30.7676	11	27.9	104.34	15429000000	71	H0UID4;H0UID3;A8K916;A0A140VJE8;P63010;A0A087X253;Q68DI0;A8K0G3;H0UID5;B4DWG4;B4E261;B4DIL5;Q96EL6;A0A087WU93;A0A087WZQ6;A0A087WYD1;K7EN71;K7ERB2;K7EJX1;K7EJ01;H7C034	H0UID4;H0UID3;A8K916;A0A140VJE8;P63010;A0A087X253;Q68DI0;A8K0G3;H0UID5;B4DWG4;B4E261;B4DIL5;Q96EL6	AP complex subunit beta;AP-2 complex subunit beta	AP2B1;DKFZp781K0743
31.7191	31.5659	31.8164	31.8816	31.6352	31.801	31.9065	32.0513	31.7777	14	71.9	31.703	31392000000	128	J3QT28;A0A140VJF3;O43684;B4DDM6;J3QSX4	J3QT28;A0A140VJF3;O43684;B4DDM6	Mitotic checkpoint protein BUB3	BUB3
30.5492	30.4803	30.6251	30.4967	30.4899	30.8191	30.7481	30.6375	30.5988	14	36.1	33.428	13908000000	103	A0A140VJF4;P53004;C9J1E1	A0A140VJF4;P53004	Biliverdin reductase A	BLVRA
32.2657	32.4484	32.1774	32.6178	32.5756	32.7167	32.4526	32.1789	32.5313	17	64.2	30.037	48917000000	162	A0A140VJG8;P21964;B8XPJ7;E7EMS6;B8XPJ8;E7EUU8;H7BZ45;F8WBW9;A3F6Y9;F2WW55;F2WW53;A0A1S6YJG6	A0A140VJG8;P21964;B8XPJ7;E7EMS6;B8XPJ8;E7EUU8	Catechol O-methyltransferase	COMT
27.2332	27.226	27.44	27.1471	27.459	27.1959	27.4108	27.4273	27.7556	5	36.7	16.588	1468000000	23	A0A140VJI5;Q9BVJ7	A0A140VJI5;Q9BVJ7	Dual specificity protein phosphatase 23	DUSP23
26.7714	26.9327	27.0485	26.9887	26.8707	27.4717	26.483	26.9979	27.1903	6	15.2	60.673	1112300000	17	A0A140VJI7;Q16610;C8CHS3;B7ZAS5	A0A140VJI7;Q16610;C8CHS3	Extracellular matrix protein 1	ECM1
32.0535	31.6859	32.2073	31.8098	31.692	32.0899	32.3853	32.0742	32.368	9	46.1	31.462	37905000000	112	A0A140VJJ2;P10768;X6RA14;H7BZT7;U3KQT1	A0A140VJJ2;P10768;X6RA14;H7BZT7	S-formylglutathione hydrolase	ESD
32.5277	32.561	32.5432	32.368	32.2129	32.3446	32.5404	32.6096	32.5749	16	63.3	37.432	50318000000	144	A0A140VJK1;O76003	A0A140VJK1;O76003	Glutaredoxin-3	GLRX3
30.1891	30.0258	30.2096	30.3562	30.307	30.2365	30.0986	29.9642	30.0798	24	43.7	80.833	10124000000	102	A0A140VJK2;P43304;Q53T76;A8K1Z2;B7Z601;F5GYK7;Q8WUQ0;A0A0S2Z3S0;Q53RD0;E9PDK4;E7EM56	A0A140VJK2;P43304;Q53T76;A8K1Z2;B7Z601	Glycerol-3-phosphate dehydrogenase, mitochondrial;Glycerol-3-phosphate dehydrogenase	GPD2
33.4053	33.2219	33.1844	33.0623	32.9578	33.1428	33.2049	33.3485	33.2473	35	69.7	76.715	83318000000	326	A0A140VJK6;P49915;B4DUT7;Q53F90	A0A140VJK6;P49915;B4DUT7;Q53F90	GMP synthase [glutamine-hydrolyzing]	GMPS
28.645	28.4637	28.7532	28.6013	28.0865	28.3462	28.8124	28.6545	28.9107	5	48	23.39	3430700000	20	A0A140VJK7;Q7Z4H3;H0UI52;H0UI53;V9GYS5;V9GZ04	A0A140VJK7;Q7Z4H3;H0UI52;H0UI53	HD domain-containing protein 2	HDDC2
29.7445	28.9104	28.7525	28.9378	28.6089	28.6683	28.7795	28.6989	28.864	12	37.8	43.482	4295200000	34	A0A140VJL0;Q6NVY1;F8W8A6;B9A058;B8ZZZ0;H7C400;H7C1A5;H7C126;H7BYI7	A0A140VJL0;Q6NVY1	3-hydroxyisobutyryl-CoA hydrolase, mitochondrial	HIBCH
31.1905	31.1388	31.2586	31.0337	30.7168	31.0561	31.2127	31.1128	31.1478	9	45.9	24.588	19480000000	76	Q6LET3;A0A140VJL3;P00492;A0A0H3YEQ7	Q6LET3;A0A140VJL3;P00492	Hypoxanthine-guanine phosphoribosyltransferase	HPRT1
28.1831	27.8738	27.9994	26.9074	27.3697	NaN	NaN	27.3466	26.7987	3	14.1	34.52	1480500000	10	B7Z3I9;A0A140VJL9;P13716;A0A024R877;Q6ZMU0;B7ZBK6	B7Z3I9;A0A140VJL9;P13716;A0A024R877;Q6ZMU0	Delta-aminolevulinic acid dehydratase	ALAD
26.4663	26.1768	26.3308	26.7345	25.9592	26.7439	NaN	25.6836	26.1564	5	19.2	44.389	630040000	18	A0A140VJM1;A4D126	A0A140VJM1;A4D126	Isoprenoid synthase domain-containing protein	ISPD
28.9397	29.0313	29.2442	29.0545	29.2647	29.0985	29.0687	29.182	29.0707	12	23.6	68.249	4813400000	54	A0A140VJN3;Q9H9A6	A0A140VJN3;Q9H9A6	Leucine-rich repeat-containing protein 40	LRRC40
30.5697	30.541	30.6354	30.6815	30.2223	30.4911	30.5426	30.4119	30.498	13	52.1	37.551	12889000000	106	A0A140VJP2;Q9NZL9;H7C0X7;B7Z1X8;E5RJR3	A0A140VJP2;Q9NZL9;H7C0X7;B7Z1X8	Methionine adenosyltransferase 2 subunit beta	MAT2B
32.2696	32.0822	32.3533	32.3996	32.2513	32.4177	32.2433	32.3528	32.3937	21	44.3	43.66	44769000000	194	A0A140VJP5;P31153;B4DEX8;B4E1K2;B4DN74;B4DFQ8;A8K455;Q00266	A0A140VJP5;P31153;B4DEX8	S-adenosylmethionine synthase isoform type-2;S-adenosylmethionine synthase	MAT2A
33.6888	33.7481	33.7851	33.6931	33.5475	33.634	33.9155	33.8443	33.8745	24	61.7	48.534	121520000000	249	A0A140VJQ4;P04181;Q59HE2	A0A140VJQ4;P04181;Q59HE2	Ornithine aminotransferase, mitochondrial;Ornithine aminotransferase, hepatic form;Ornithine aminotransferase, renal form	OAT
NaN	NaN	NaN	NaN	NaN	NaN	26.0867	NaN	NaN	2	3.6	83.642	249710000	3	A0A140VJQ6;Q9BXB4	A0A140VJQ6;Q9BXB4	Oxysterol-binding protein-related protein 11	OSBPL11
27.2481	26.2263	27.1216	26.8844	27.0259	26.6999	26.6998	26.5922	26.6362	4	10.7	64.505	1001300000	13	A0A140VJQ8;A0A1B0GTU4;P49023;B4DRY6;F5GZ78;Q6ZQU7;B3KVL0;A0A1B0GU60;B4DNT9;A0A1B0GV30;Q59GS5	A0A140VJQ8;A0A1B0GTU4;P49023;B4DRY6;F5GZ78;Q6ZQU7;B3KVL0;A0A1B0GU60	Paxillin	PXN
27.3256	25.7521	27.6509	26.1862	25.6546	25.9114	26.0901	26.1591	27.3727	6	16.4	54.582	891350000	9	J3K000;A0A140VJR2;P12955;K7ES25;V9GYE4;V9GY89	J3K000;A0A140VJR2;P12955	Xaa-Pro dipeptidase	PEPD
31.0247	30.862	31.1728	31.0396	30.6036	30.9853	31.136	30.9959	31.2072	13	58.3	35.631	18251000000	81	Q8WZ56;B3KRM2;A0A140VJS0;P62714;Q5U0I7;B3KQ51;H0YC23;E5RHC1;H0YBN9;E5RFI3;E7ESG8;E5RJX4;E5RHP4;B7Z2C5	Q8WZ56;B3KRM2;A0A140VJS0;P62714;Q5U0I7;B3KQ51;H0YC23	Serine/threonine-protein phosphatase;Serine/threonine-protein phosphatase 2A catalytic subunit beta isoform	PPP2CB
32.6535	32.6621	32.7607	32.6694	32.5896	32.7509	32.8289	32.7978	32.6713	25	67.2	45.626	62653000000	229	A0A140VJS3;P62195;Q59GS3;J3QSA9;J3QQM1;J3KRP2;J3QLH6;J3QSE0;J3QRW1;J3QRR3;J3KTQ9	A0A140VJS3;P62195;Q59GS3;J3QSA9;J3QQM1	26S protease regulatory subunit 8	PSMC5
30.6834	30.3593	30.5598	30.6619	30.4517	30.5455	30.6549	30.5569	30.5647	7	28.4	20.207	13303000000	65	B7Z478;A0A140VJS6;P49721;Q59FJ0;A0A087WVV1	B7Z478;A0A140VJS6;P49721;Q59FJ0	Proteasome subunit beta type-2;Proteasome subunit beta type	PSMB2
32.5297	32.3398	32.2547	32.3559	32.3622	32.3206	32.4741	32.3723	32.3722	19	68.6	38.631	46827000000	147	A0A140VJS9;P62136;B3KXM2;E9PMD7;B4DNE3;F5H1L6;F5H037;C0STL0;F8W0V8	A0A140VJS9;P62136;B3KXM2;E9PMD7	Serine/threonine-protein phosphatase PP1-alpha catalytic subunit;Serine/threonine-protein phosphatase	PPP1CA
30.6139	30.3879	30.5784	30.5903	30.6224	30.5797	30.4261	30.5913	30.3255	10	37.4	51.647	13052000000	56	Q56VW8;A0A140VJT0;P63151;Q66LE6;E5RIY1;E5RFR9;Q6PEG1;Q6IN90;Q6ZP32;A0A1W2PQI2;B3KMA9;Q00005;E5RHQ2;E5RJV2;H0YA16;H0YB06;Q9Y2T4	Q56VW8;A0A140VJT0;P63151	Serine/threonine-protein phosphatase 2A 55 kDa regulatory subunit B;Serine/threonine-protein phosphatase 2A 55 kDa regulatory subunit B alpha isoform	PPP2R2A
30.0892	29.9217	30.0765	30.1433	29.9482	29.9885	29.9607	29.8486	30.0664	10	42.2	28.956	9025700000	71	Q5QPM7;A0A140VJT2;Q92530;Q5QPM9;B4DFK1;B4DUJ0;H0Y555;B4DXW9;F5H4Z3	Q5QPM7;A0A140VJT2;Q92530;Q5QPM9;B4DFK1;B4DUJ0	Proteasome inhibitor PI31 subunit	PSMF1
NaN	NaN	24.67	24.4902	24.4932	24.7422	NaN	NaN	NaN	2	19.2	25.899	109870000	7	B2R9V7;A0A140VJU8;P08294	B2R9V7;A0A140VJU8;P08294	Superoxide dismutase [Cu-Zn];Extracellular superoxide dismutase [Cu-Zn]	SOD3
33.0541	33.1075	33.1858	33.1976	33.0096	33.1884	33.0675	32.99	33.1492	5	32.2	17.33	77453000000	50	B5BU83;A0A140VJW2;P16949;A2A2D0;Q59G27;Q96CE4;B7Z4K3;E5RGX5;B7Z4N6;Q93045	B5BU83;A0A140VJW2;P16949;A2A2D0;Q59G27;Q96CE4	Stathmin	STMN1
32.9415	32.8496	32.9361	33.0542	32.9047	32.8844	32.8188	32.7639	32.8098	34	69.3	57.136	66478000000	307	A0A140VJW5;P14868;D3DP78;Q53T60;Q53R85;H7C278;C9JLC1;H7BZ35;C9J7S3;C9JQM9	A0A140VJW5;P14868;D3DP78;Q53T60	Aspartate--tRNA ligase, cytoplasmic	DARS
31.4656	31.5204	31.7278	31.5337	31.6237	31.7465	31.7683	31.5213	31.7257	11	37.7	45.199	27815000000	133	A0A140VJX1;P24752;H0YEL7;E9PRQ6;E9PKF3	A0A140VJX1;P24752	Acetyl-CoA acetyltransferase, mitochondrial	ACAT1
28.8265	28.6669	29.0695	28.8824	28.6035	28.9148	29.3606	28.9569	28.9256	8	34.3	33.178	4305900000	42	A0A140VJX3;P25325;Q2VEU1;B1AH49;Q59HD5;Q2VEU0	A0A140VJX3;P25325;Q2VEU1;B1AH49;Q59HD5	3-mercaptopyruvate sulfurtransferase;Sulfurtransferase	MPST
27.6655	27.2356	27.1838	27.3348	27.2104	27.0251	27.2965	27.3589	27.0554	7	21.6	62.921	1370700000	22	A0A140VJX5;Q96SK2;C9J5K4;C9JYX1	A0A140VJX5;Q96SK2	Transmembrane protein 209	TMEM209
32.9827	32.7874	33.0101	32.9279	32.9528	32.9031	32.9568	32.7856	32.9241	41	60.9	80.109	68150000000	322	A0A140VJY2;Q12931;Q53FS6;Q59EK6;I3L0K7;K0A7K7;Q5CAQ4;I3L239;I3L253;I3L2D5	A0A140VJY2;Q12931;Q53FS6;Q59EK6;I3L0K7;K0A7K7;Q5CAQ4	Heat shock protein 75 kDa, mitochondrial	TRAP1
30.9512	30.758	30.8191	30.5991	30.5966	30.5992	30.9693	31.0073	31.0387	9	72.4	13.941	16041000000	69	A0A140VJY7;Q9BRA2;I3L0K2;I3L3M7;I3L2R6	A0A140VJY7;Q9BRA2;I3L0K2;I3L3M7;I3L2R6	Thioredoxin domain-containing protein 17	TXNDC17
31.3237	30.8581	31.3109	31.128	30.8424	31.0402	31.2324	31.2172	31.2876	21	29.7	95.785	20047000000	165	A0A140VJZ1;P45974;F5H571;H7C5J3;A0A0A6YZ17;Q92995	A0A140VJZ1;P45974	Ubiquitin carboxyl-terminal hydrolase 5	USP5
29.1863	29.3998	29.7504	29.4961	29.2817	29.4888	29.5736	29.5389	29.5184	8	45.2	26.182	6271700000	50	A0A140VJZ4;P15374;A0A087WTB8;Q5TBK7	A0A140VJZ4;P15374;A0A087WTB8;Q5TBK7	Ubiquitin carboxyl-terminal hydrolase isozyme L3;Ubiquitin carboxyl-terminal hydrolase	UCHL3
26.7679	26.6334	26.9749	26.8163	26.9504	26.7938	27.1993	27.3016	26.8726	6	13.8	97.34	1085700000	31	A0A140VK05;Q92667;B4DN86;I3L0W0;I3L3K1;I3L364;I3L0K6;O15113;I3L2A2;I3L2N7	A0A140VK05;Q92667;B4DN86;I3L0W0	A-kinase anchor protein 1, mitochondrial	AKAP1
28.6862	28.9846	28.8252	28.9493	28.9656	28.891	28.6637	28.7185	28.8603	13	23.8	78.728	4024200000	51	A0A140VK11;H0YGM0;Q9H078;Q7Z777;F5H392	A0A140VK11;H0YGM0;Q9H078;Q7Z777	Caseinolytic peptidase B protein homolog	CLPB
29.2456	29.0353	29.0863	29.2382	28.923	29.1521	28.9379	29.1382	29.0418	13	27.9	97.621	4814900000	52	A0A140VK12;Q9UBF2;Q9H9B7;B3KND4;Q9NUP3;Q9H279;Q9NSM7	A0A140VK12;Q9UBF2;Q9H9B7;B3KND4;Q9NUP3	Coatomer subunit gamma-2;Coatomer subunit gamma	COPG2
28.6421	28.7537	28.8219	28.9107	28.8741	29.259	28.8722	28.7602	28.873	12	28.9	73.776	4094000000	45	A0A140VK13;P23786;A0A1B0GV75;A0A1B0GVF3;Q53G79;A0A1B0GTB8;A0A1B0GWC0;A0A1B0GTM0;A0A1B0GUD9	A0A140VK13;P23786;A0A1B0GV75;A0A1B0GVF3;Q53G79;A0A1B0GTB8;A0A1B0GWC0	Carnitine O-palmitoyltransferase 2, mitochondrial	CPT2
26.8044	26.7432	26.7792	26.8655	26.6649	26.8277	26.6761	26.8894	27.0217	2	35.1	61.433	983480000	14	A0A140VK14;P49448;Q9BSD0	A0A140VK14;P49448	Glutamate dehydrogenase 2, mitochondrial	GLUD2
NaN	NaN	NaN	24.8467	24.9435	NaN	NaN	NaN	NaN	2	4.7	132.29	102560000	10	A8K930;A0A140VK17;Q8NDI1;B3KM32;H7BZ98	A8K930;A0A140VK17;Q8NDI1	EH domain-binding protein 1	EHBP1
30.7204	30.8544	30.79	30.7877	30.5701	30.8299	31.0115	30.8495	30.8269	20	43.2	69.284	15794000000	111	A0A140VK27;P09960;B4DVZ8;Q49AK0;Q59ES1;B4DEH5	A0A140VK27;P09960;B4DVZ8	Leukotriene A-4 hydrolase;Leukotriene A(4) hydrolase	LTA4H
29.6101	29.4675	29.6816	29.5496	29.5987	29.6234	29.5719	29.4776	29.6499	18	37.1	61.332	6701300000	82	A0A140VK29;Q9HCC0;D6RDF7;A0A0S2Z5R4;D6RD67;D6R9R1;B3KR24;A0A0G2JM88	A0A140VK29;Q9HCC0;D6RDF7;A0A0S2Z5R4	Methylcrotonoyl-CoA carboxylase beta chain, mitochondrial	MCCC2
31.0979	31.2511	31.4229	31.3474	31.2745	31.3739	31.3983	31.5511	31.4673	14	41.5	42.315	23069000000	103	A0A140VK39;Q9Y570	A0A140VK39;Q9Y570	Protein phosphatase methylesterase 1	PPME1
29.8656	30.0632	29.9358	29.994	29.6709	29.9917	29.8575	30.053	30.002	6	48	35.054	8636600000	50	A0A140VK41;P11908;B2R860;A6NMS2;D3YTJ7;H7C540	A0A140VK41;P11908;B2R860	Ribose-phosphate pyrophosphokinase 2	PRPS2
32.3643	32.4843	32.574	32.5394	32.6522	32.7733	32.7017	32.7032	32.6593	23	71.9	47.352	54897000000	179	R4GNH3;A0A140VK42;P17980;A8K781;E9PM69;E9PKD5;E9PMD8;E9PN50;E9PLG2	R4GNH3;A0A140VK42;P17980;A8K781;E9PM69;E9PKD5;E9PMD8;E9PN50	26S protease regulatory subunit 6A	PSMC3
33.1119	33.2406	33.3719	33.2654	33.3358	33.4366	33.4307	33.3846	33.3557	12	46.7	28.415	90552000000	116	Q6IB71;A0A140VK43;P25788;G3V4X5;G3V3W4;G3V5N4;H0YJ03	Q6IB71;A0A140VK43;P25788;G3V4X5	Proteasome subunit alpha type;Proteasome subunit alpha type-3	PSMA3
32.7934	32.9795	32.9201	32.9648	32.9509	33.0983	32.9664	32.9937	32.9772	13	63.4	27.399	69967000000	129	A0A140VK44;P60900;G3V295;G3V5Z7;G3V3I1;G3V3U4;G3V4S5;Q9BZ93;G3V2S7;Q59F72;H0YJC4	A0A140VK44;P60900;G3V295;G3V5Z7;G3V3I1;G3V3U4	Proteasome subunit alpha type-6;Proteasome subunit alpha type	PSMA6
31.7572	31.817	31.5317	31.8494	31.7191	31.572	31.585	31.7566	31.7209	12	69.3	26.489	29447000000	110	A0A140VK45;P20618;Q59GN1	A0A140VK45;P20618;Q59GN1	Proteasome subunit beta type-1;Proteasome subunit beta type	PSMB1
31.2129	31.4953	31.6195	31.5204	31.4949	31.9108	31.7634	31.6743	31.946	9	50	29.204	28100000000	70	A0A140VK46;P28070;B4DFL3	A0A140VK46;P28070	Proteasome subunit beta type-4	PSMB4
34.2659	34.3845	34.4537	34.5329	34.6886	34.648	34.3074	34.3132	34.3989	55	68.7	102	195980000000	590	A0A140VK49;Q7KZF4;Q59FF0;B4E299;B3KU67;I6TRR8;H7C597	A0A140VK49;Q7KZF4;Q59FF0;B4E299;B3KU67;I6TRR8	Staphylococcal nuclease domain-containing protein 1	SND1
32.9218	32.9669	32.9963	32.9566	32.7686	32.8738	32.9796	33.0559	32.9489	49	24.3	299.61	69183000000	360	A0A140VK53;Q9UQ35;O60382;A0AUK8;I3L4D8;I3L182;Q9UQ39;I3L1I8;A0A087X1W1;I3L1C0;Q05BI2;Q05CV9;I3L3Q8	A0A140VK53;Q9UQ35;O60382	Serine/arginine repetitive matrix protein 2	SRRM2;KIAA0324
28.6442	28.6572	28.5709	28.8041	28.4488	28.6696	28.6852	28.7077	28.7813	9	27.4	48.076	3708200000	35	A0A140VK54;O95630;C9JK83;C9JEK5;F5H5B9;C9JZ93	A0A140VK54;O95630;C9JK83;C9JEK5;F5H5B9	STAM-binding protein	STAMBP
33.4165	34.2586	33.7495	33.7514	34.2198	34.2065	33.7303	34.1294	33.9262	18	41.5	37.54	138320000000	152	A0A140VK56;P37837;F2Z393;B4DID5;E9PM01;E9PKI8;Q9UMF8	A0A140VK56;P37837;F2Z393	Transaldolase	TALDO1
25.309	25.7103	25.4414	25.5358	25.3269	25.6957	24.52	25.1708	24.9074	2	11.2	33.366	351580000	16	B7Z307;A0A140VK59;Q96BY9;E5RHW0;H0YAZ1;H0YAN9;H0YBH7	B7Z307;A0A140VK59;Q96BY9;E5RHW0;H0YAZ1;H0YAN9;H0YBH7	Store-operated calcium entry-associated regulatory factor	SARAF
31.4947	31.5696	31.5428	31.685	31.6133	31.7724	31.609	31.6632	31.625	15	32.5	56.5	27638000000	146	A0A140VK65;P21281;Q59HF3;H0YC04;B4DFM5;B4DQI9;E5RGH6;H0YAT8;C9J5E3;C9JNS9	A0A140VK65;P21281;Q59HF3;H0YC04	V-type proton ATPase subunit B, brain isoform	ATP6V1B2
32.3092	32.1331	32.4059	32.6576	32.4077	32.6773	32.1747	32.2132	32.3335	20	60.8	46.247	47076000000	157	A0A140VK69;P17174;Q2TU84;B7Z1I2	A0A140VK69;P17174;Q2TU84;B7Z1I2	Aspartate aminotransferase, cytoplasmic;Aspartate aminotransferase	GOT1;GIG18
32.3008	32.171	32.3485	32.4239	32.1745	32.2491	32.3309	32.3607	32.2229	25	62.6	48.633	44180000000	219	A0A140VK70;P35998;A0A1W2PQS1;Q75L23;C9JLS9;B7Z571	A0A140VK70;P35998;A0A1W2PQS1;Q75L23	26S protease regulatory subunit 7	PSMC2
26.8224	26.8437	27.3104	27.6589	27.8463	27.619	27.0449	26.0822	27.3425	4	12.3	51.867	1330200000	14	Q53FK2;A0A140VK72;P48723;B4DQX6;B3KY30	Q53FK2;A0A140VK72;P48723;B4DQX6;B3KY30	Heat shock 70 kDa protein 13	HSPA13
30.9459	30.2723	30.9687	30.2323	29.4605	29.781	30.6456	30.8689	30.8365	15	40.3	61.067	13228000000	109	A0A140VK73;Q9NPH2;B3KSG0;B7Z3K3;J3QS51;J3KRH4;J3QKW9;J3QRY0;J3QRH1;J3QLD7	A0A140VK73;Q9NPH2;B3KSG0;B7Z3K3;J3QS51	Inositol-3-phosphate synthase 1	ISYNA1
31.2766	31.304	31.3763	31.4259	31.2372	31.2048	31.2395	30.9854	31.1437	11	61.8	34.261	21357000000	72	B2RB06;A0A140VK76;Q16836;A0A1W2PNM1;A0A0A0MSE2;B3KTT6;A0A0D9SFP2;E9PF18;A0A1W2PQV5;A0A1W2PQC2;A0A1W2PRT2;A0A1W2PQ78;A0A1W2PP40;A0A1W2PQ55	B2RB06;A0A140VK76;Q16836;A0A1W2PNM1;A0A0A0MSE2;B3KTT6;A0A0D9SFP2;E9PF18;A0A1W2PQV5;A0A1W2PQC2;A0A1W2PRT2	Hydroxyacyl-coenzyme A dehydrogenase, mitochondrial	HADH
30.0293	29.7125	29.7392	29.7704	30.0033	30.137	30.002	29.7449	29.7621	16	48.1	41.564	8336600000	79	A0A140VK83;Q15435;C9JD73;C9J177;H7C003;H7C118;C9JRC4;B5MBZ8;H7C3Q5	A0A140VK83;Q15435;C9JD73;C9J177;H7C003	Protein phosphatase 1 regulatory subunit 7	PPP1R7
27.876	27.5896	28.0843	27.9196	27.9142	27.8625	28.0042	28.0041	28.1085	5	23.2	28.95	2146700000	28	B4DXG0;B4DE94;B2RD19;A0A140VK84;Q9HA64;Q6FIG5;I3L2G3;I3L139;I3L3W5;I3L378	B4DXG0;B4DE94;B2RD19;A0A140VK84;Q9HA64;Q6FIG5;I3L2G3;I3L139	Ketosamine-3-kinase	FN3KRP
28.2492	28.2592	28.5253	28.719	28.3234	28.5199	28.4895	28.3102	28.3673	3	7.7	21.984	3027700000	18	H3BV04;H3BN93;H3BUB6;H3BPL9;B3KU14;Q6IBK3;A8K769;A0A140VK92;O15127	H3BV04;H3BN93;H3BUB6;H3BPL9;B3KU14;Q6IBK3;A8K769;A0A140VK92;O15127	Secretory carrier-associated membrane protein 2	SCAMP2
33.4826	32.9247	33.3251	33.0776	32.6614	32.9109	33.2166	33.0752	33.3424	19	67.2	25.63	79941000000	232	F8W1A4;A0A140VK93;P54819;F8VY04;F8VZG5;B4DLK2;G3V213;F8VPP1	F8W1A4;A0A140VK93;P54819;F8VY04;F8VZG5	Adenylate kinase 2, mitochondrial;Adenylate kinase 2, mitochondrial;Adenylate kinase 2, mitochondrial, N-terminally processed	AK2
34.4905	34.4999	34.5182	34.4725	34.2636	34.254	34.3487	34.4191	34.3192	11	63.7	23.31	190400000000	161	A0A140VK94;P43487;C9JJ34;B7Z6U1;B4DE76;F6WQW2;D3DX26;C9JXG8;C9JGV6;C9JDM3;C9JIC6;B3KUP2	A0A140VK94;P43487;C9JJ34;B7Z6U1;B4DE76;F6WQW2;D3DX26;C9JXG8;C9JGV6	Ran-specific GTPase-activating protein	RANBP1
32.6213	32.7018	32.6584	32.5717	32.459	32.6922	32.6604	32.7899	32.7085	16	41.3	35.015	57229000000	139	Q0IJ56;B4E0U6;A0A140VKA6;P50502;H7C3I1;Q3KNR6;Q1XBU6;B7ZA40;Q8IZP2;Q8NFI4;F6VDH7;Q1XBU7;D6W507;F8WAQ7	Q0IJ56;B4E0U6;A0A140VKA6;P50502;H7C3I1;Q3KNR6;Q1XBU6;B7ZA40;Q8IZP2;Q8NFI4	Hsc70-interacting protein;Putative protein FAM10A4;Putative protein FAM10A5	ST13;ST13P4;ST13P5
29.1772	29.4445	29.3801	29.3525	29.1193	29.3532	29.2064	29.3914	29.4787	6	42.6	25.789	5631900000	51	A0A140VKA9;P09417;H0Y8F7;B7Z415;D6RGG7	A0A140VKA9;P09417;H0Y8F7;B7Z415;D6RGG7	Dihydropteridine reductase	QDPR
31.6297	31.0765	31.8186	31.501	30.9746	30.9821	31.701	31.5224	31.4918	15	41.8	57.028	24649000000	121	A0A140VKC0;Q16222	A0A140VKC0;Q16222	UDP-N-acetylhexosamine pyrophosphorylase;UDP-N-acetylgalactosamine pyrophosphorylase;UDP-N-acetylglucosamine pyrophosphorylase	UAP1
27.1401	27.0964	27.2506	27.3772	27.4878	27.554	27.0055	27.3141	27.1593	10	28.9	53.323	1356200000	43	A0A140VKC4;E9LUH3;D9ZNA4;D3YJ43;D0UU70;C6KG45;A8K079;E9LUH4;P51608;E1B2J3;D5L9I5;B5MCB4;A0A0S2Z401;A0A075BPP5;D6QZ43;A0A087X1U4;C6KG44;A0A087WVW7;A0A0D9SFX7;D5L9I4;A0A0S2Z3U3;I6LM39;A0A075BPH5;A0A075BRI2;A0A075BRJ5;C6FGV0;A0A0S2Z3Y9;A0A0S2Z400;Q59FJ6	A0A140VKC4;E9LUH3;D9ZNA4;D3YJ43;D0UU70;C6KG45;A8K079;E9LUH4;P51608;E1B2J3;D5L9I5;B5MCB4;A0A0S2Z401	Methyl-CpG-binding protein 2	MECP2
29.9704	30.121	30.1615	29.8545	29.9073	30.2749	30.101	30.1081	30.2596	14	57	35.892	9634400000	87	A0A140VKC8;Q13630;E9PKL9;E9PP14;A0A0J9YX13;B3KU96;B4DZW9;E9PLH9;H0YCP7;H0YE90;E9PP60	A0A140VKC8;Q13630;E9PKL9;E9PP14;A0A0J9YX13;B3KU96;B4DZW9	GDP-L-fucose synthase	TSTA3
31.0274	31.2786	31.2464	31.2478	31.0999	31.2166	31.2185	31.1317	31.1228	18	48.9	55.676	20417000000	109	A0A140VKE1;A0A087WYS1;E7EUC7;B4DUP2;Q16851;Q53QE9;B2RAN1;D6W5E6;C9JNZ1;C9JVG3;C9JWG0;C9JQU9;C9JTZ5;C9JUW1;F2Z3H1;C9J3M0;F2Z3P4;F8WC70	A0A140VKE1;A0A087WYS1;E7EUC7;B4DUP2;Q16851;Q53QE9;B2RAN1;D6W5E6	UTP--glucose-1-phosphate uridylyltransferase	UGP2
31.1502	31.2436	31.2592	31.2452	31.0083	31.2339	31.4384	31.3262	31.2845	30	48.5	94.504	21369000000	147	Q53ZP9;A0A140VKE7;O95757;E9PDE8;B4DXT2;B4DZR0;B3KNM0;D6RJ96	Q53ZP9;A0A140VKE7;O95757;E9PDE8;B4DXT2;B4DZR0;B3KNM0;D6RJ96	Heat shock 70 kDa protein 4L	HSPA4L
30.5847	30.5298	30.7552	30.619	30.5468	30.7038	30.6503	30.6968	30.7401	10	29.3	71.456	14248000000	72	A0A140VKE9;Q13409;Q59GU5;B4DPZ3;E7EQL5;B4DX93;E7EV09;Q9H5W7;E7EQU2;E7ESD3;E7EMU4;E7ET01;E7ETL8;Q53SA6;E9PGG1;E7EU01;E7EUM4;E7ERR6;E7ERH4	A0A140VKE9;Q13409;Q59GU5;B4DPZ3;E7EQL5;B4DX93	Cytoplasmic dynein 1 intermediate chain 2	DYNC1I2
30.9468	30.9299	31.0312	30.8318	30.8196	30.9594	31.3121	31.4345	31.4016	23	38.6	81.34	19339000000	140	A8K3S3;A0A140VKF1;Q99661;B7Z6Q6;B7Z7M6;Q5JR89;Q5JR91;Q8N5N1	A8K3S3;A0A140VKF1;Q99661;B7Z6Q6;B7Z7M6;Q5JR89;Q5JR91;Q8N5N1	Kinesin-like protein;Kinesin-like protein KIF2C	KIF2C
31.9443	32.0497	32.0826	32.2128	31.9623	32.0111	32.0298	31.9426	31.8713	11	51.6	34.577	36282000000	104	A0A140VKF2;O00487;Q53TH1;Q59G89;Q4ZG77;Q96DE8;C9JW37	A0A140VKF2;O00487;Q53TH1;Q59G89	26S proteasome non-ATPase regulatory subunit 14	PSMD14
28.7017	28.4413	28.4324	28.635	28.8805	29.1443	28.6406	28.5241	28.8969	11	30.5	55.468	3676100000	46	A0A140VKG4;Q9NRY5;E7ESJ7;B4DQT0;B4E1J2;B3KTE4;I6L9D5;E5RGF9;E5RFK2;E5RHP2;E5RHI8	A0A140VKG4;Q9NRY5;E7ESJ7;B4DQT0;B4E1J2;B3KTE4	Protein FAM114A2	FAM114A2
28.5378	28.7174	28.5988	28.629	28.6363	28.6141	28.6275	28.4169	28.2828	5	10.4	71.648	3292800000	27	A0A140VKH3;Q9ULX6;M0R1Y5;M0QYT7;B3KMD4;V9GZ50;M0R010	A0A140VKH3;Q9ULX6	A-kinase anchor protein 8-like	AKAP8L
28.1553	27.989	28.235	28.3502	28.446	28.3808	28.1084	27.8679	28.0751	9	18.3	90.117	2555400000	43	A7MCZ7;E9PHI4;A0A146IHP0;A4D2Q0;O94901;H0Y742;H0Y6N5;B4E278;Q5S4N2;H7C2K3;H7C3X3;C9JK55	A7MCZ7;E9PHI4;A0A146IHP0;A4D2Q0;O94901;H0Y742;H0Y6N5;B4E278	SUN domain-containing protein 1	UNC84A;SUN1
31.1539	31.0594	31.2224	31.1892	31.0219	31.1244	31.1036	31.0895	31.2375	12	63.8	23.489	19820000000	51	A0A158RFU6;P51149;C9J8S3;B4DPH9;C9J4V0;C9J4S4;C9J592;C9IZZ0;C9J7D1	A0A158RFU6;P51149;C9J8S3;B4DPH9;C9J4V0;C9J4S4;C9J592;C9IZZ0	Ras-related protein Rab-7a	RAB7A
25.3328	26.8385	25.742	25.886	26.94	26.6385	25.4641	NaN	NaN	5	5.7	91.742	616010000	17	Q59FD2;G3V599;A0A193H6U5;O15320;Q96PC5;Q05BM1;Q4G155;Q8NEG8;Q96RT6;G3V3C4;Q2VIL8	Q59FD2;G3V599;A0A193H6U5;O15320;Q96PC5	cTAGE family member 5;Melanoma inhibitory activity protein 2	CTAGE5;MIA2
NaN	26.1783	NaN	25.8495	26.1193	NaN	NaN	NaN	NaN	3	13.6	30.334	381840000	6	B7Z1I9;A0A1B0GTB0;A0A1B0GTU8;B7Z4S4;A0A1B0GUT7;A0A1B0GVW0;O75787;A0A1B0GWD6;A0A1B0GVI9;A0A1B0GVC7;A0A1B0GWJ8;H7C3E1;B7Z413;A0A1B0GVB9;A0A1C7CYW4;H7C240;A0A1B0GV24;B7Z487;A0A1B0GW13;A0A1B0GV60;A0A1B0GU12	B7Z1I9;A0A1B0GTB0;A0A1B0GTU8;B7Z4S4;A0A1B0GUT7;A0A1B0GVW0;O75787;A0A1B0GWD6;A0A1B0GVI9;A0A1B0GVC7;A0A1B0GWJ8;H7C3E1;B7Z413;A0A1B0GVB9;A0A1C7CYW4	Renin receptor	ATP6AP2
25.8732	25.4284	25.3572	25.3317	25.3588	25.3159	25.3266	25.4044	25.3203	4	11.5	58.309	378520000	6	B3KU60;A0A1B0GTC3;A0A1B0GVH5;Q9C0B1;A0A1B0GUC3;A0A1B0GV98;A0A1B0GTC5;A0A1B0GU26;A0A1B0GUY7;B4DHN4;A0A1B0GTY1;A0A1B0GTZ8;A0A1B0GTI3	B3KU60;A0A1B0GTC3;A0A1B0GVH5;Q9C0B1;A0A1B0GUC3;A0A1B0GV98;A0A1B0GTC5;A0A1B0GU26;A0A1B0GUY7;B4DHN4;A0A1B0GTY1	Alpha-ketoglutarate-dependent dioxygenase FTO	FTO
31.4158	31.6097	31.4581	31.311	31.3495	31.2677	31.4503	31.5707	31.5055	20	57.5	54.465	24492000000	230	A0A1B0GWJ0;A0A1B0GTJ7;X5D8S6;Q71UA4;P30566;B4DP46;A0A0A6YY92;A0A1B0GWF8;A8K4X6;X5DP48;X5D2Z4;A0A1B0GTG9;A0A096LNY5;A0A096LNY6;B4DUM2;A0A096LNY4;B4DEP1;A0A096LP72;A0A096LP92;A0A096LPA2;X5D7V4;A0A096LP76;A0A1W2PRX2;X5D7W4;V9GY96;A0A096LNT0	A0A1B0GWJ0;A0A1B0GTJ7;X5D8S6;Q71UA4;P30566;B4DP46;A0A0A6YY92;A0A1B0GWF8;A8K4X6;X5DP48;X5D2Z4;A0A1B0GTG9;A0A096LNY5;A0A096LNY6;B4DUM2	Adenylosuccinate lyase	ADSL
25.9681	25.6794	25.9271	26.2297	26.0918	25.9705	25.3211	25.5274	25.4037	8	17.6	67.232	494670000	18	A0A1B0GU58;B2RDE0;P05165;A0A1B0GWA1;A0A1B0GUX9;A0A1B0GWI4;A0A1B0GTR1;H0Y5U0;Q5JTW6	A0A1B0GU58;B2RDE0;P05165;A0A1B0GWA1;A0A1B0GUX9;A0A1B0GWI4;A0A1B0GTR1	Propionyl-CoA carboxylase alpha chain, mitochondrial	PCCA
28.4267	28.2211	28.5349	28.6623	28.4957	28.4758	28.3692	28.3615	28.5722	9	22.1	74.783	3095900000	39	A0A1B0GUA3;Q96EK5;A0A1B0GTE6;A0A0D9SFK7;A0A1B0GUH6;A0A1B0GV79;A0A1B0GW21;A0A1B0GVY9	A0A1B0GUA3;Q96EK5	KIF1-binding protein	KIAA1279
23.8431	NaN	NaN	24.5302	NaN	NaN	NaN	NaN	NaN	4	3.6	207.22	124680000	6	A0A1B0GUA8;Q9H1H9;H0Y925;Q9H6Z3;H0Y307	A0A1B0GUA8;Q9H1H9	Kinesin-like protein KIF13A	KIF13A
NaN	NaN	NaN	NaN	NaN	NaN	NaN	NaN	23.3855	2	9.3	37.622	59897000	2	A0A1B0GUF4;O60447;Q59FE7	A0A1B0GUF4;O60447;Q59FE7	Ecotropic viral integration site 5 protein homolog	EVI5
24.7916	24.6312	NaN	NaN	NaN	24.8737	NaN	NaN	NaN	3	3.9	96.13	209730000	9	A0A1B0GUZ7;Q14156;A0PJL1;B4DZ89;B4DG97;A2VDI4;E5RJS1	A0A1B0GUZ7;Q14156;A0PJL1;B4DZ89;B4DG97;A2VDI4	Protein EFR3 homolog A	EFR3A
NaN	NaN	NaN	NaN	NaN	NaN	NaN	NaN	25.4516	4	7.5	81.911	237490000	5	E7EUW9;A0A1B0GWI0;Q53TD9;A0A1B0GVV8;A0A1B0GW50;A0JP08;A0A1B0GV02;O60315;A0A1X7SC99	E7EUW9;A0A1B0GWI0;Q53TD9;A0A1B0GVV8;A0A1B0GW50;A0JP08;A0A1B0GV02;O60315;A0A1X7SC99	Zinc finger E-box-binding homeobox 2	ZEB2;ZFHX1B
24.1172	NaN	NaN	23.8946	NaN	23.8118	24.0825	NaN	NaN	2	6.6	45.531	125980000	4	A0A1B0GV57;B4DIR9;Q9NYJ8	A0A1B0GV57;B4DIR9;Q9NYJ8	TGF-beta-activated kinase 1 and MAP3K7-binding protein 2	TAB2
27.8435	27.9449	27.8915	28.0138	28.0772	28.1188	27.7846	27.9331	27.9243	7	38.8	27.957	2158400000	41	A0A1B0GVD3;Q6ZN17;A0A1B0GTK2;A7E2T3	A0A1B0GVD3;Q6ZN17;A0A1B0GTK2;A7E2T3	Protein lin-28 homolog B	LIN28B
31.7613	31.5182	31.9137	31.9471	31.8404	31.9142	31.8038	31.6988	31.8646	12	48.9	44.237	31537000000	105	A0A1B0GVD5;A0A1B0GWE8;V9HWI3;P07339;A0A1B0GW44;A0A1B0GV23;A0A1B0GU92;A0A1B0GU03;A0A1B0GVP3;C9JH19;H7C469;F8WD96;H7C1V0;F8W787;A0A0S2Z3L4;A0A1B0GV01;A0A1B0GVF1	A0A1B0GVD5;A0A1B0GWE8;V9HWI3;P07339;A0A1B0GW44;A0A1B0GV23;A0A1B0GU92;A0A1B0GU03;A0A1B0GVP3;C9JH19;H7C469;F8WD96	Cathepsin D;Cathepsin D light chain;Cathepsin D heavy chain	HEL-S-130P;CTSD
NaN	NaN	NaN	NaN	NaN	NaN	NaN	NaN	27.5567	2	3.7	87.218	377740000	3	D6RFZ4;A0A1B0GVL4;P78312;E7EUR8;B7Z8P8	D6RFZ4;A0A1B0GVL4;P78312;E7EUR8;B7Z8P8	Protein FAM193A	FAM193A
NaN	NaN	NaN	NaN	NaN	NaN	NaN	24.8676	NaN	3	14.8	44.765	134520000	2	A0A1B0GVV3;Q5EBL4	A0A1B0GVV3;Q5EBL4	RILP-like protein 1	RILPL1
26.2328	26.5055	26.4698	26.6411	26.6595	26.8265	26.6621	26.6341	26.6195	3	6.1	84.533	847670000	11	A0A1B0GW05;Q2PZI1;H7C3M5	A0A1B0GW05;Q2PZI1;H7C3M5	Probable C-mannosyltransferase DPY19L1	DPY19L1
NaN	NaN	26.5019	26.3102	NaN	NaN	27.2253	NaN	27.2808	2	19	16.646	790320000	5	E9PEN0;B7Z6R2;A0A1B0GW41;Q8WYH8	E9PEN0;B7Z6R2;A0A1B0GW41;Q8WYH8	Inhibitor of growth protein 5	ING5
26.9276	NaN	27.1336	27.1905	27.4439	27.493	26.7665	27.2791	26.9456	9	18.1	87.479	1223500000	15	A0A1C7CYX0;Q2M3D2	A0A1C7CYX0;Q2M3D2	Exocyst complex component 3-like protein 2	EXOC3L2
26.8791	26.907	27.2303	27.3599	26.9653	27.1734	26.9821	26.7457	27.1061	6	10.8	120.73	1161200000	29	A0A1C7CYX1;A0A0A0MSU2;A0PJD3;A0A024R689;Q6PJG2;Q8NF55;H7C1L3	A0A1C7CYX1;A0A0A0MSU2;A0PJD3;A0A024R689;Q6PJG2	ELM2 and SANT domain-containing protein 1	ELMSAN1;C14orf43
29.7352	29.8326	29.664	29.9256	29.7055	29.9317	NaN	29.8234	29.8312	6	25.6	68.183	7150300000	17	Q59GB4;A0A1C7CYX9;Q16555;Q53ET2;Q8NAN9;A9CQZ2;E5RFU4;A9CQZ4	Q59GB4;A0A1C7CYX9;Q16555;Q53ET2	Dihydropyrimidinase-related protein 2	DPYSL2
32.7272	32.7077	32.7958	32.7158	32.3771	32.3197	32.7765	32.7209	32.6776	15	68.6	18.873	56805000000	136	I3L1K6;A0A1C7CYY4;P12829;I3L532;I3L3U1;I3L4B1;A0A024R2Q5;P08590	I3L1K6;A0A1C7CYY4;P12829;I3L532;I3L3U1	Myosin light chain 4	MYL4
27.7197	27.7791	27.3975	26.9619	NaN	27.0423	27.6149	27.9759	27.8491	6	18.1	52.63	1629000000	20	A0A1C9HIM0;A0A1C9HIK4;A0A1C9HIH9;Q96PL5;B7Z3C6	A0A1C9HIM0;A0A1C9HIK4;A0A1C9HIH9;Q96PL5	Erythroid membrane-associated protein	ERMAP
23.8266	NaN	NaN	23.8635	23.8542	23.9511	23.7777	23.4293	NaN	4	4.4	164.8	103950000	9	A0A1C9J735;A0A1C9J732;Q8TEK3;A0A087X1A7;C9JH95;H7C2S2	A0A1C9J735;A0A1C9J732;Q8TEK3	Histone-lysine N-methyltransferase, H3 lysine-79 specific	DOT1L
29.5276	29.1128	29.0456	29.0535	28.9288	29.0684	28.8325	29.0537	28.8098	6	71.8	15.508	4702300000	40	A0A1K0GUV5;P09105	A0A1K0GUV5;P09105	Hemoglobin subunit theta-1	HBQ1
33.6786	33.5953	33.7369	33.7116	33.6978	33.688	33.6249	33.5201	33.6679	21	76	30.772	118270000000	216	A0A1L1UHR1;P21796;B3KTS5;C9JI87;B4DEI3	A0A1L1UHR1;P21796;B3KTS5;C9JI87	Voltage-dependent anion-selective channel protein 1	VDAC1
27.7082	26.9857	26.6054	26.2915	26.0231	26.8167	26.6634	26.9681	27.0207	4	27.7	20.733	1040600000	20	A0A1L5BXV2;Q96HR9;A8MXN1;A8MWX0;B4DF39	A0A1L5BXV2;Q96HR9;A8MXN1;A8MWX0;B4DF39	Receptor expression-enhancing protein 6;Receptor expression-enhancing protein	REEP6
29.861	30.1991	30.1617	29.992	29.9488	30.0297	30.0288	29.9873	30.0856	15	35.7	64.732	9206900000	68	A0A1L7NY50;Q10471;G3V1S6;A0A1L7NY41;B7Z6K2;B7Z462	A0A1L7NY50;Q10471;G3V1S6;A0A1L7NY41;B7Z6K2	Polypeptide N-acetylgalactosaminyltransferase 2;Polypeptide N-acetylgalactosaminyltransferase 2 soluble form;Polypeptide N-acetylgalactosaminyltransferase	GALNT2
30.0116	29.9239	29.8934	29.8553	29.7456	29.8956	29.8204	29.8766	29.6974	28	21.4	206.56	8168000000	113	A0A1P7ZIN0;J3KN01;P55196;G1UI22;A8MQ02;Q5TIG5;H0Y8L4;H0Y948;H0Y8U8;F8W9I4;E9PFY5;Q1WD23;H0Y9I0;H0YA98	A0A1P7ZIN0;J3KN01;P55196;G1UI22;A8MQ02;Q5TIG5	Afadin	MLLT4
34.864	34.9072	34.9101	34.9836	34.9778	35.048	34.9542	34.9378	34.9151	101	56.5	271.42	278440000000	923	A0A1S5UZ07;Q9Y490;H0YMT1;A0A1B0GVU7;G1UI21;B4DGF3	A0A1S5UZ07;Q9Y490	Talin-1	TLN1
35.7234	35.4558	35.7657	35.9005	35.6642	35.6514	35.4044	35.2497	35.5006	9	89.4	15.257	438370000000	176	D1MGQ2;A0A1S5UZ39;P69905;A0A0K2BMD8;A0A1K0GXZ1;U6A216;E9M4D4;I1VZV6;Q9BX83;Q4ZGM8;E1B2D1;V9H1D9;Q96T46;P78461;Q86YL2;Q6J1Z9;Q9NQT3;Q86YQ4;Q86YQ1;U6A493;U3PXP0;Q86YQ5;E9LUX2;V9GZG8;Q7Z6G4;Q7Z7B4	D1MGQ2;A0A1S5UZ39;P69905;A0A0K2BMD8;A0A1K0GXZ1;U6A216;E9M4D4;I1VZV6;Q9BX83;Q4ZGM8;E1B2D1;V9H1D9;Q96T46;P78461	Hemoglobin subunit alpha	HBA2;HBA1
25.4381	NaN	NaN	NaN	NaN	NaN	NaN	NaN	NaN	3	5	116.84	147020000	6	A0A1S5UZH2;Q8TDZ2;Q6ZMJ8;Q5TED7;H0Y6Z4;H0UI45	A0A1S5UZH2;Q8TDZ2;Q6ZMJ8	Protein-methionine sulfoxide oxidase MICAL1	MICAL1;FLJ00407
29.3662	28.841	29.1845	28.977	28.8825	28.982	29.062	29.0033	29.0947	3	31	21.825	4679200000	21	B4DX69;A0A1S5UZH5;Q99757;M0QXH0;F8WDN2	B4DX69;A0A1S5UZH5;Q99757;M0QXH0	Thioredoxin, mitochondrial	TXN2
32.8434	32.501	32.6387	32.6467	32.4046	32.5086	32.59	32.6667	32.6026	29	43.1	95.925	54889000000	264	A0A1U9X609;Q8NE71;Q2L6I2;Q59F96;H0YGW7;B4DNU2;A0A0G2JIC2;Q5STZ8;A0PJ72	A0A1U9X609;Q8NE71;Q2L6I2;Q59F96;H0YGW7	ATP-binding cassette sub-family F member 1	ABCF1
24.4691	NaN	NaN	NaN	NaN	NaN	NaN	NaN	NaN	2	4.1	76.427	62016000	1	A0A1U9X799;A0A1U9X796;Q6AZW6;Q99941	A0A1U9X799;A0A1U9X796;Q6AZW6;Q99941	Cyclic AMP-dependent transcription factor ATF-6 beta;Processed cyclic AMP-dependent transcription factor ATF-6 beta	ATF6B
NaN	NaN	NaN	NaN	NaN	NaN	25.5827	NaN	NaN	2	12.2	31.756	224300000	9	A0A1U9X7G1;A0A1U9X7F9;A0A1U9X7F2;Q9UMP7;O95873;A0A1U9X7F5	A0A1U9X7G1;A0A1U9X7F9;A0A1U9X7F2;Q9UMP7;O95873;A0A1U9X7F5	Uncharacterized protein C6orf47	G4;C6orf47
NaN	22.8667	NaN	NaN	22.985	NaN	NaN	NaN	NaN	3	3.2	52.114	13921000	2	Q53HH3;A0A1U9X7S4;Q92759	Q53HH3;A0A1U9X7S4;Q92759	General transcription factor IIH subunit 4	GTF2H4
24.9564	25.0549	24.9031	25.3486	25.7152	25.2669	24.7479	24.9484	25.3373	3	16.5	26.989	315940000	12	A0A1U9X7U8;A0A1U9X7U3;Q92506	A0A1U9X7U8;A0A1U9X7U3;Q92506	Estradiol 17-beta-dehydrogenase 8	HSD17B8
27.5502	27.7117	27.821	27.8121	27.583	27.6969	27.408	27.4299	27.3979	11	34.4	42.968	1706900000	30	A0A1U9X839;A0A1U9X830;P18615;H9ZYJ1;A0A0A0MT02;B7Z6T4;A0A0A0MSN9;A2ABK4;A0A0G2JI50;E9PD43;B4DZZ3;Q9BQJ6;E7ENC7;E7EWR7	A0A1U9X839;A0A1U9X830;P18615;H9ZYJ1;A0A0A0MT02;B7Z6T4	Negative elongation factor E	NELFE;NELF-E;RDBP
28.1779	28.4892	28.4009	28.5062	28.585	28.5836	28.4304	28.568	28.6794	8	23.6	42.429	3176100000	46	A0A1U9X8F2;A0A1U9X8F1;Q06587;B4DVB5;B4DW57;A0A024RCR9;B4DMN3	A0A1U9X8F2;A0A1U9X8F1;Q06587;B4DVB5;B4DW57;A0A024RCR9	E3 ubiquitin-protein ligase RING1	RING1
25.9754	26.5353	26.3069	26.2242	26.9489	26.318	26.1612	26.3103	26.2027	5	16.8	43.382	720670000	29	Q59EC6;A0A1U9X8R9;P14373;A0A0G2JIZ4	Q59EC6;A0A1U9X8R9;P14373;A0A0G2JIZ4	Zinc finger protein RFP	TRIM27
27.1572	26.6271	26.6966	26.8356	26.6687	26.6374	26.2796	26.5004	26.0684	9	19.1	68.495	871030000	11	A0A1U9X8S4;B4DS44;Q4VXZ2;Q8N1B4;A0A024RCY1;B4E225;B4DTZ4;B3KMF7;A0A024RCT2;A0A0G2JIG2;O60838	A0A1U9X8S4;B4DS44;Q4VXZ2;Q8N1B4;A0A024RCY1;B4E225;B4DTZ4;B3KMF7;A0A024RCT2	Vacuolar protein sorting-associated protein 52 homolog	VPS52
30.901	30.8025	30.8817	30.7959	30.6302	30.8786	30.8144	30.7685	30.7142	26	21.1	228.83	15711000000	201	A0A1U9X9A9;A0A1U9X999;A0A1U9X996;A0A1U9X993;A0A1U9X985;A0A1U9X982;A0A1U9X977;A0A1U9X975;A0A1U9X974;A0A1U9X972;P48634;A0A1U9X998;A0A1U9X988;B4DZ56;B4DLY2;B4DQ12	A0A1U9X9A9;A0A1U9X999;A0A1U9X996;A0A1U9X993;A0A1U9X985;A0A1U9X982;A0A1U9X977;A0A1U9X975;A0A1U9X974;A0A1U9X972;P48634;A0A1U9X998;A0A1U9X988	Protein PRRC2A	PRRC2A
30.2609	30.317	30.4384	30.5222	30.5448	30.559	30.4779	30.6104	30.5693	33	29.9	226.64	12553000000	164	A0A1U9XBC2;A0A1U9XBF2;A0A1U9XBE3;A0A1U9XBE0;A0A1U9XBC1;A0A1U9XBC0;A0A1U9XBB2;Q14676;A0A1U9XBD4;A0A1U9XBE1;A0A1U9XBD9;A0A1U9XBC3;B4DYH4;A2AB05;A1Z5I7;A1Z5I6;A2AB06;A2AB07;A0A087X0R2;A1Z5I8;H0Y6Z8;B4DQD0	A0A1U9XBC2;A0A1U9XBF2;A0A1U9XBE3;A0A1U9XBE0;A0A1U9XBC1;A0A1U9XBC0;A0A1U9XBB2;Q14676;A0A1U9XBD4;A0A1U9XBE1;A0A1U9XBD9;A0A1U9XBC3;B4DYH4	Mediator of DNA damage checkpoint protein 1	MDC1
NaN	NaN	NaN	NaN	NaN	NaN	25.6387	NaN	NaN	6	5.3	193.27	478080000	4	X5D9D6;X5D7Q2;X5D2U8;H3BMQ0;A0A1V1FWL6;P49815;H3BQK4;B3KSR9;A0A1V1FWM5;X5DRA7;A0A1V1G0E9;X5DP08;B3KWH7;A0A1V1FR23;Q5HYF7;X5DP61;X5D7S4;X5D7T9;X5D9F9;X5D2X0;A0A1V1FK96;A0A1V1FNX1;X5DRC8;X5D7Z6;A0A1V1FFQ4;X5D9K3;A0A1V1G0D9;A0A1V1FNX9;A0A1V1FI06;A0A1V1FTF4;A0A1V1FGH9	X5D9D6;X5D7Q2;X5D2U8;H3BMQ0;A0A1V1FWL6;P49815;H3BQK4;B3KSR9;A0A1V1FWM5;X5DRA7;A0A1V1G0E9	Tuberin	TSC2
NaN	NaN	NaN	NaN	NaN	NaN	NaN	NaN	24.2684	2	2.1	103.19	96674000	4	A0A1W1GST9;A0A1W1GSK9;Q92889;B4DXD8	A0A1W1GST9;A0A1W1GSK9;Q92889;B4DXD8	DNA repair endonuclease XPF	ERCC4
27.2088	26.7954	27.2498	27.5063	27.3501	27.1646	26.9505	27.2893	27.3413	7	26.7	37.759	1309800000	21	A0A1W2PQN1;A0A1W2PRZ8;A0A1W2PP57;A0A1W2PPC3;A0A1W2PPS0;A0A1W2PPR6;A0A1W2PNP0;Q969N2;A0A1W2PQ52;A0A1W2PP13;A0A1W2PPQ7;B7Z3L1;B7Z1F1;A0A1W2PP53;H7C2Y2;A0A1W2PQ29;A0A1W2PPI8;B7ZAP3;B7Z1N3;A0A1W2PRH2;F6W983;A0A1W2PR92;A0A1W2PSC5;A0A1W2PQY1;A0A1W2PRG1;A0A1W2PNW9;B7Z4T7;A0A1W2PRV7;A0A1W2PR70;A0A1W2PPK4;A0A1W2PRH8;A0A1W2PPU8	A0A1W2PQN1;A0A1W2PRZ8;A0A1W2PP57;A0A1W2PPC3;A0A1W2PPS0;A0A1W2PPR6;A0A1W2PNP0;Q969N2;A0A1W2PQ52;A0A1W2PP13;A0A1W2PPQ7;B7Z3L1;B7Z1F1;A0A1W2PP53;H7C2Y2;A0A1W2PQ29;A0A1W2PPI8;B7ZAP3;B7Z1N3;A0A1W2PRH2;F6W983;A0A1W2PR92	GPI transamidase component PIG-T	PIGT
30.5105	30.4246	30.4754	30.5753	30.4935	30.6039	30.3771	30.2896	30.2753	14	22.7	75.872	12285000000	79	A0A1W2PNV4;Q75MY0;E9PF58;Q59GQ0;F8WFD3	A0A1W2PNV4
NaN	24.9896	NaN	NaN	NaN	NaN	NaN	NaN	NaN	3	4.6	76.125	213740000	4	Q9BQD2;A0A1W2PNW1;B2R680;P42226;G3V5I8;G3V370;G3V5K5;B4DQB3;A8K4S9;Q5FBW6;G3V2L2;G3V2M3;G3V3E9;G3V2H4;G3V568;H0YIY2;B4DR42;B7ZAC1	Q9BQD2;A0A1W2PNW1;B2R680;P42226;G3V5I8;G3V370;G3V5K5;B4DQB3;A8K4S9	Signal transducer and activator of transcription;Signal transducer and activator of transcription 6	STAT6
NaN	26.4301	NaN	NaN	26.2677	NaN	NaN	NaN	NaN	2	9.1	28.997	587430000	11	A0A1W2PQA7;A0A1W2PP47;A0A1W2PNY5;A0A1W2PQZ6;A0A1W2PRF0;A0A1W2PRJ0;A0A1W2PPP6;A0A1X7SBS0;A0A1W2PS93;A0A1W2PR08;A0A1W2PRF5;B1B1I7;G5E9D4;Q96EB1;A0A1W2PPR3;A0A1W2PS44;A0A1W2PQ05;A0A1W2PP49;E9PPJ9;A0A1W2PNW2	A0A1W2PQA7;A0A1W2PP47;A0A1W2PNY5;A0A1W2PQZ6;A0A1W2PRF0;A0A1W2PRJ0;A0A1W2PPP6;A0A1X7SBS0;A0A1W2PS93;A0A1W2PR08;A0A1W2PRF5;B1B1I7;G5E9D4;Q96EB1;A0A1W2PPR3;A0A1W2PS44;A0A1W2PQ05;A0A1W2PP49;E9PPJ9;A0A1W2PNW2	Elongator complex protein 4	ELP4
25.0992	25.1116	24.9249	24.3884	24.9272	24.884	24.9712	25.4283	25.1495	4	2.5	263.15	285920000	16	B7ZLC8;A0A1W2PNZ9;Q15652;A0PJE4	B7ZLC8;A0A1W2PNZ9;Q15652	Probable JmjC domain-containing histone demethylation protein 2C	JMJD1C
28.6988	28.816	29.0972	29.1936	28.7522	29.2571	29.1909	29.1384	29.1141	5	32.5	22.625	4648700000	19	A0A1X7SBU8;A0A1W2PRV0;A0A1W2PPG5;A0A1W2PPP5;I3L4Z6;A0A1W2PPG1;A0A1W2PRC2;A0A1W2PQM3;A0A1W2PS81;E7EQ34;I3NI02;O14653;A0A1W2PQ06;I3L1K7;A0A1W2PR23;A0A1W2PPJ0;A0A1W2PPW8;A0A1W2PQ77;A0A1W2PR02;A0A1W2PRP7;I3L0K1;A0A1W2PNV3;A0A1W2PRE6;A0A1W2PS12;A0A1W2PRL0;A0A1W2PQP2;B4E141;A0A1W2PRD0;A0A1W2PQ38;A0A1W2PQE0;A0A1W2PP28;A0A1W2PQS3;A0A1W2PQQ4	A0A1X7SBU8;A0A1W2PRV0;A0A1W2PPG5;A0A1W2PPP5;I3L4Z6;A0A1W2PPG1;A0A1W2PRC2;A0A1W2PQM3;A0A1W2PS81;E7EQ34;I3NI02;O14653;A0A1W2PQ06;I3L1K7;A0A1W2PR23;A0A1W2PPJ0;A0A1W2PPW8;A0A1W2PQ77;A0A1W2PR02;A0A1W2PRP7;I3L0K1;A0A1W2PNV3;A0A1W2PRE6;A0A1W2PS12;A0A1W2PRL0;A0A1W2PQP2;B4E141	Golgi SNAP receptor complex member 2	GOSR2
28.5873	28.6886	28.7985	28.9259	28.8457	28.9237	28.7979	28.7493	29.093	11	27.1	61.221	3983600000	31	A0A1W2PPH1;P23368;A0A1W2PQF8;A0A1W2PR68;A0A1W2PQT3;A0A1W2PQH3;A0A1W2PQY8;A0A1W2PQ37;A0A1W2PRS2;A0A1W2PRY9;A0A1W2PQH4;A0A1W2PPY2;A0A1W2PRH1	A0A1W2PPH1;P23368;A0A1W2PQF8;A0A1W2PR68;A0A1W2PQT3;A0A1W2PQH3;A0A1W2PQY8;A0A1W2PQ37	NAD-dependent malic enzyme, mitochondrial	ME2
NaN	NaN	NaN	24.3724	NaN	NaN	NaN	NaN	NaN	2	16.2	22.396	96350000	6	O95330;A0A1W2PPS8;A6PVJ3;H0Y621;A2TJK5;Q5JWS0;H0Y5K5;Q9Y282;B4DV36	O95330;A0A1W2PPS8;A6PVJ3;H0Y621;A2TJK5;Q5JWS0;H0Y5K5;Q9Y282;B4DV36	Endoplasmic reticulum-Golgi intermediate compartment protein 3	ERGIC3
29.7051	30.0417	29.9835	30.2926	30.0747	30.062	29.4938	29.6896	29.8186	10	35.5	33.935	8527100000	53	A0A1W2PPZ5;P23193;B7Z4W0;A0A1W2PRL9;E5RJ93;E5RIS7;E5RK46;A0A1W2PS15;E5RFI1;A0A1W2PPV7;B7Z4S1	A0A1W2PPZ5;P23193;B7Z4W0;A0A1W2PRL9	Transcription elongation factor A protein 1	TCEA1
32.3445	32.3557	32.5431	32.6785	32.4956	32.563	32.5416	32.5167	32.5097	26	45	80.253	51082000000	185	A0A1X7SBZ2;A0A1W2PQ51;Q59F66;Q92841;B4DZQ7;Q9UQL5;A0A0U1RQJ0	A0A1X7SBZ2;A0A1W2PQ51;Q59F66;Q92841;B4DZQ7	Probable ATP-dependent RNA helicase DDX17	DDX17
NaN	NaN	NaN	NaN	NaN	NaN	NaN	NaN	23.4686	2	4	83.548	74104000	2	A0A1W2PQ69;P0CJ79;Q9NV72	A0A1W2PQ69;P0CJ79;Q9NV72	Zinc finger protein 888;Zinc finger protein 701	ZNF888;ZNF701
31.4266	31.0406	31.3799	31.2141	30.9452	30.8421	31.1473	31.0904	31.2203	10	25.8	33.14	20133000000	72	A0A1W2PQS6;S4R435;O95989	A0A1W2PQS6;S4R435;O95989	Diphosphoinositol polyphosphate phosphohydrolase 1	RPS10-NUDT3;NUDT3
28.4015	27.0939	27.7721	27.6031	27.2625	27.1208	27.8891	28.1249	27.8951	2	30	10.999	1908500000	6	A0A1W2PQV2;H3BUH9;Q6QN92;Q6IAT2;Q53XL7;P23434	A0A1W2PQV2;H3BUH9;Q6QN92;Q6IAT2;Q53XL7;P23434	Glycine cleavage system H protein, mitochondrial	GCSH
NaN	NaN	NaN	NaN	25.1459	NaN	NaN	NaN	NaN	4	6.3	127.98	116480000	3	A0A1W2PR28;Q5JU85;A0A1W2PRJ5;A0A1W2PQ34;A0A1W2PR18;C7SDG0;A0A1W2PPU7	A0A1W2PR28;Q5JU85;A0A1W2PRJ5	IQ motif and SEC7 domain-containing protein 2	IQSEC2
NaN	NaN	NaN	NaN	NaN	NaN	NaN	NaN	24.702	2	8.2	68.007	218870000	2	H7C5A5;A0A1X7SBY3;H0Y860;A0A1W2PRA1;B3KUB5;Q9P246;H7C5K2	H7C5A5;A0A1X7SBY3;H0Y860;A0A1W2PRA1;B3KUB5;Q9P246;H7C5K2	Stromal interaction molecule 2	STIM2
29.0653	29.0598	29.3135	29.1276	28.8525	29.2749	29.2073	28.9077	29.0654	10	13.4	93.444	4844200000	57	A0A1W2PRB8;A0A1W2PQ48;A0A1W2PS69;E9PM72;A0A1W2PNW7;B4DSE1;A0A1W2PS27;Q9NVC6;A0A1W2PNF3;A0A1W2PPP8;A0A1W2PR99;A0A1W2PRX4;A0A1W2PQE4;E9PKQ4	A0A1W2PRB8
26.6725	26.6213	26.7246	26.2716	NaN	NaN	26.7543	27.1668	26.5138	3	25.6	24.38	809330000	10	B4DP61;A0A1W2PRV5;E7EQZ4;Q16637;Q9UNT8;H0YBZ9;I2E4S9;I2E4T2;I3QJX8;I2E4T3;I6T6Y4;A0A0G2JRX5;I2E4S7;I2E4T1;I3QJX9;A0A0G2JRY6;A0A076L8Z0	B4DP61;A0A1W2PRV5;E7EQZ4;Q16637	Survival motor neuron protein	SMN2;SMN1
26.1983	26.244	26.5241	26.7918	26.6475	26.3208	26.0489	26.2721	26.0625	4	6.9	94.398	723900000	17	B4DPV9;A8MYT4;A0A1W2PS05;Q8NEB9;K7ENH3;K7EIV6;M0R308;K7EKH3	B4DPV9;A8MYT4;A0A1W2PS05;Q8NEB9	Phosphatidylinositol 3-kinase;Phosphatidylinositol 3-kinase catalytic subunit type 3	PIK3C3
28.5219	28.476	28.6648	28.5611	28.5611	28.6894	28.5042	28.458	28.3603	12	24.4	77.717	3251000000	57	A0AV58;Q13033;G3V340;G3V3G7;H0YJZ4;H0YJT2	A0AV58;Q13033;G3V340	Striatin-3	STRN3
NaN	25.107	NaN	NaN	25.3411	NaN	NaN	NaN	NaN	4	10.4	75.198	206170000	5	A0JLR2;Q12986	A0JLR2;Q12986	Transcriptional repressor NF-X1	NFX1
26.1059	NaN	NaN	NaN	25.9441	26.1257	26.5866	26.7169	26.8019	4	14.5	17.404	698770000	12	A0JLT0;Q9NS18	A0JLT0;Q9NS18	Glutaredoxin-2, mitochondrial	GLRX2
28.1615	27.8532	28.3686	28.0181	28.1219	28.0058	28.0365	27.9759	27.9743	13	12.6	153.19	2341100000	46	B2RAJ6;A0JP11;Q99570;D6RJ98;D6RAC3;D6RBB7	B2RAJ6;A0JP11;Q99570	Phosphoinositide 3-kinase regulatory subunit 4	PIK3R4
29.978	30.26	30.7818	30.4426	30.2973	31.0698	31.2792	31.0245	31.2977	10	79.3	16.363	15433000000	65	A0M8W4;Q15819;G3V113;H0YBX6;H0YBP9;E5RIF1;D6RG00	A0M8W4;Q15819;G3V113;H0YBX6;H0YBP9	Ubiquitin-conjugating enzyme E2 variant 2	UBE2V2
30.4013	30.3507	30.4718	30.8483	30.6608	30.6093	30.8073	30.7427	30.5656	11	26.3	57.543	13775000000	68	A0MNN4;Q2TAY7	A0MNN4;Q2TAY7	WD40 repeat-containing protein SMU1;WD40 repeat-containing protein SMU1, N-terminally processed	SMU1
30.8201	30.6474	30.8055	30.8305	30.6778	30.8373	30.883	30.9081	30.8533	15	45.9	39.31	15764000000	96	A0MNP2;Q96DI7;B2R9I9;Q9NSS8	A0MNP2;Q96DI7;B2R9I9	U5 small nuclear ribonucleoprotein 40 kDa protein	WDR57;SNRNP40
29.6796	29.8522	29.8826	30.0849	29.9168	30.0189	29.7766	29.6943	29.8505	20	40.7	71.639	8177900000	118	A0MZ66	A0MZ66	Shootin-1	KIAA1598
31.4958	31.1913	31.4869	30.9325	30.7117	30.8902	31.667	31.8485	31.6096	8	85	16.055	23287000000	59	A0N071;P02042;D1MGQ0;E9PFT6;Q670S4;Q4F786;B2M1S8;Q14477;Q6J1Z7;Q9UK54;Q14485;Q5XTR9;Q4JLR8;B2M1S6;A1YZ08;Q9UE58;D1MGP8;Q6VFQ6;Q6VFQ5;B2M1S7;B2M0Y1;C9JRG0	A0N071;P02042;D1MGQ0;E9PFT6;Q670S4;Q4F786;B2M1S8;Q14477	Hemoglobin subunit delta	HBD;HBB
32.0305	32.1944	32.1388	31.9196	31.9843	32.0145	32.2322	32.3227	32.3918	6	41.9	14.558	39409000000	57	E7EPB3;A0PJ62;B7Z6S8;A8K7N0;Q6IPH7;P50914;A8K3Q9	E7EPB3;A0PJ62;B7Z6S8;A8K7N0;Q6IPH7;P50914;A8K3Q9	60S ribosomal protein L14	RPL14
29.2042	29.1905	29.2203	29.0776	29.103	29.1999	29.1711	29.2417	29.218	7	28.8	34.446	5099600000	42	A0PJ79;Q9BYD6;H0Y8N7	A0PJ79;Q9BYD6;H0Y8N7	39S ribosomal protein L1, mitochondrial	MRPL1
25.8471	26.4118	26.1992	26.2292	26.5569	26.3797	25.7886	26.3982	26.1032	3	10.3	49.584	657200000	13	A0PJI7;Q86X95;H3BLY3	A0PJI7;Q86X95	Corepressor interacting with RBPJ 1	CIR;CIR1
NaN	26.4616	26.3656	26.3487	26.3062	26.4384	26.6231	26.0053	26.0082	3	10.3	56.732	725290000	15	M0R026;A1L0T0;M0QZX5;Q59GP4	M0R026;A1L0T0	Acetolactate synthase-like protein	ILVBL
25.2183	25.2896	25.3677	25.6266	25.8965	25.6376	25.405	25.3997	25.5848	3	40.8	8.2937	396390000	15	D6RE10;D6RBR5;D6RBM2;A1L3X0;D6RHD0	D6RE10;D6RBR5;D6RBM2;A1L3X0	Elongation of very long chain fatty acids protein;Elongation of very long chain fatty acids protein 7	ELOVL7
27.6254	27.7648	27.2739	27.8327	27.4708	27.4057	27.7882	27.8822	27.7704	7	14.8	86.435	1779900000	27	A1L3Z9;Q2TAL8;Q9H9Z1;Q9NXG9;C9JAL2;C9JIA8	A1L3Z9;Q2TAL8;Q9H9Z1;Q9NXG9	Glutamine-rich protein 1	QRICH1
NaN	NaN	NaN	NaN	NaN	25.512	NaN	NaN	NaN	3	2.9	116.72	262220000	2	Q59GY9;A4D1D2;A1L471;P08183	Q59GY9;A4D1D2;A1L471;P08183	Multidrug resistance protein 1	ABCB1
26.8848	27.2779	27.2975	27.1878	27.4624	27.1917	27.0978	27.2758	27.2311	6	21.5	48.088	1310600000	24	A1L4K2;B5BUB8;P45983;B7Z1Z1;Q499Y8;I6L9F3;D6RJF9;H0Y9H3;A8MWW6;A0A1P0B7D2;P53779;A0A1W2PRF2;B3KR72;D7R525;A6NF29;D6RCB1;J3KNK1;A0A1W2PPZ3;C9JWQ4	A1L4K2;B5BUB8;P45983;B7Z1Z1;Q499Y8;I6L9F3;D6RJF9;H0Y9H3;A8MWW6;A0A1P0B7D2;P53779	Mitogen-activated protein kinase;Mitogen-activated protein kinase 8;Mitogen-activated protein kinase 10	MAPK8;MAPK10
25.5588	25.3256	25.4072	25.7283	25.1341	25.6696	25.4208	25.5364	25.2188	2	3.3	147.39	386760000	21	A2A2F0;Q86X10;Q6MZJ2;B4E2E8;B3KWL5;A0A0J9YW54	A2A2F0;Q86X10;Q6MZJ2;B4E2E8;B3KWL5;A0A0J9YW54	Ral GTPase-activating protein subunit beta	RALGAPB;DKFZp686N19168
26.6444	26.956	26.8612	27.0625	26.915	27.0603	26.9699	27.2861	27.209	5	17.6	45.034	1153300000	29	A2A2Q9;Q9Y312	A2A2Q9;Q9Y312	Protein AAR2 homolog	AAR2
32.2215	32.3172	32.2643	32.3698	32.3773	32.3523	32.5739	32.6997	32.418	10	31.3	28.708	47774000000	91	Q96DV6;A2A3R6;P62753;A2A3R5;Q9BZU1;A2A3R7	Q96DV6;A2A3R6;P62753;A2A3R5	40S ribosomal protein S6	RPS6
NaN	29.2552	26.2725	25.7734	27.2884	NaN	NaN	25.0857	24.2122	2	13.5	13.952	930700000	13	A2BEK1;O60927	A2BEK1;O60927	Protein phosphatase 1 regulatory subunit 11	PPP1R11
26.8961	27.0017	26.9398	27.1409	26.7249	NaN	NaN	NaN	NaN	4	27.9	27.295	797160000	16	A2IDA3;Q1W6H1;P29372	A2IDA3;Q1W6H1;P29372	DNA-3-methyladenine glycosylase	MPG
28.5309	28.5319	28.7023	28.5193	28.7784	28.7582	28.4158	28.413	28.6453	8	27.9	28.506	3382300000	51	A2IDC6;Q13084;A2IDC7;Q4TT37;Q6FHK1	A2IDC6;Q13084;A2IDC7;Q4TT37	39S ribosomal protein L28, mitochondrial	MRPL28
NaN	24.6852	24.8095	24.6565	24.7911	25.0758	24.751	24.7036	24.8775	4	3.7	179.48	234650000	6	F2Z2E2;A2RRC9;Q86VI3	F2Z2E2;A2RRC9;Q86VI3	Ras GTPase-activating-like protein IQGAP3	IQGAP3
29.4537	29.5786	29.4589	29.6051	29.322	29.5258	29.6913	29.4559	29.6627	22	11.3	268.57	6540900000	92	A2RRP1;H0Y5G7;G1UI26;H7C007;H7C1U4;H7BZR3;H7BZU5	A2RRP1;H0Y5G7;G1UI26	Neuroblastoma-amplified sequence	NBAS
28.616	28.5334	28.484	28.6126	28.4938	28.4809	28.8511	28.5569	28.6266	15	22.2	99.277	3372400000	57	B4DHJ4;A2RU29;Q4VBZ9;Q14149;H0YHQ4;H0YIR5;Q86YD6	B4DHJ4;A2RU29;Q4VBZ9;Q14149	MORC family CW-type zinc finger protein 3	MORC3
29.7627	29.6881	29.8555	30.2114	30.0537	30.0837	29.5795	29.4534	29.6671	8	39.8	24.898	8006500000	63	Q6IAS8;A2RU94;P51159;H3BN55;H3BUD9;H3BS49;H3BVH7;H3BU81;A0A0H4JC20;K7ES41;O00194	Q6IAS8;A2RU94;P51159;H3BN55;H3BUD9;H3BS49;H3BVH7;H3BU81;A0A0H4JC20	Ras-related protein Rab-27A	RAB27A
27.3843	27.7473	28.1236	27.8522	28.1594	28.149	28.2269	27.9331	27.9304	15	22.6	120.74	2173800000	32	B7ZM87;A2RUF3;O75044;A0A1S5UZH8;Q5VZB5;B7Z3G4;A0A075B7B5;B4DDU0;Q5VZB4;P0DMP2;P0DJJ0;B4DFE5;A0A075B743;E9PDX4;A0A087X0L1;A0A087WW56;B1AKK3;A0A075B7E6;Q5VZB3;A0A075B7E9;B3KM24;A0A087X1G6;A0A075B7C8	B7ZM87;A2RUF3;O75044;A0A1S5UZH8;Q5VZB5;B7Z3G4;A0A075B7B5;B4DDU0	SLIT-ROBO Rho GTPase-activating protein 2	SRGAP2
32.784	32.947	33.0769	33.0426	33.0468	33.2149	33.1121	33.1634	33.171	11	44.9	28.044	75309000000	107	B3KTM6;A2RUM7;P46777;Q5T7N0;Q9BUV4	B3KTM6;A2RUM7;P46777;Q5T7N0	60S ribosomal protein L5	RPL5
31.701	30.9904	32.1461	31.9896	31.7859	32.252	32.6079	32.1915	32.6655	2	61.4	5.0526	38933000000	17	A2VCK8;P62328;Q0P5T0;Q0P5U7;Q0P5Q0;Q0P5P4;Q0P5N8	A2VCK8;P62328;Q0P5T0;Q0P5U7;Q0P5Q0;Q0P5P4;Q0P5N8	Thymosin beta-4;Hematopoietic system regulatory peptide	TMSB4X
29.0348	28.9533	28.9101	29.1093	28.8374	29.2718	29.1079	29.3735	29.407	15	31.6	77.703	4894300000	54	Q6NUN2;A3F769;O15226;A3F768;A2I829;A2I831;A2I832;A2I828;A1Z1A7;A2I830;A2I827	Q6NUN2;A3F769;O15226;A3F768;A2I829	NF-kappa-B-repressing factor	NKRF;NRF
24.6103	24.5483	24.6581	24.5271	24.2945	24.6351	24.3774	24.2904	24.5807	6	4	214.82	205430000	15	A3KMH1;B3KT81	A3KMH1;B3KT81	von Willebrand factor A domain-containing protein 8	VWA8
27.6749	27.8972	27.8239	27.809	27.8048	27.4734	27.8819	27.9123	27.8628	11	11.3	154.31	1961000000	34	A3KN83;B3KUC1;K7ES28;Q9Y2G9;Q9NVJ3;B4DL53	A3KN83;B3KUC1	Protein strawberry notch homolog 1	SBNO1
32.7603	32.6892	32.7226	32.7016	32.7434	32.7873	32.787	32.8871	32.8419	28	46.4	82.431	61785000000	264	A3RJH1;Q92499;F1T0B3;A0A087X2G1;B4DP70	A3RJH1;Q92499;F1T0B3;A0A087X2G1;B4DP70	ATP-dependent RNA helicase DDX1	DDX1
27.0512	26.4441	27.2332	27.6943	27.2589	27.2353	27.0508	27.1004	27.3754	5	11.7	50.283	1293000000	10	Q53FC8;A8K8C0;A4D0P7;O43913;Q9UDM8;G3V0H0;B4DXT8;Q8NDU9	Q53FC8;A8K8C0;A4D0P7;O43913;Q9UDM8	Origin recognition complex subunit 5	ORC5L;ORC5
NaN	NaN	NaN	NaN	NaN	NaN	NaN	NaN	NaN	2	21.7	19.717	0	2	A4D0S9;Q96T52;C9JVB0;A0A0C4DG32;C9JQE1	A4D0S9;Q96T52;C9JVB0;A0A0C4DG32;C9JQE1	Mitochondrial inner membrane protease subunit 2	IMMP2L
24.4531	24.6172	24.6907	25.1704	25.0774	25.2632	25.3198	24.9118	24.7779	3	6	50.268	270990000	8	A4D0U1;O00458;E9PMY4;C9JNM6;C9JA65;Q75M98;Q75M99;C9JFH1;B7Z4L0;Q75MS4	A4D0U1;O00458;E9PMY4;C9JNM6;C9JA65;Q75M98;Q75M99	Interferon-related developmental regulator 1	IFRD1
30.2092	30.424	30.4741	31.0168	30.8848	31.1702	30.5419	30.262	30.3487	15	44.4	47.966	13803000000	137	B2RDR4;A4D0U5;Q9UGI8;Q53GU1;E0X098;B7Z5L5;F8W7T0;B7Z6L5;Q9Y423;F8WDI4;H7BYK1	B2RDR4;A4D0U5;Q9UGI8;Q53GU1	Testin	TES
29.9513	30.0684	29.9347	29.9698	29.8871	29.8392	29.725	29.6978	29.7209	9	64.3	32.967	8266900000	39	Q53GE2;Q53GC7;A4D0V4;P47755;F8W9N7;C9JUG7;A0A0D9SET8;B4DE01;F8WED3	Q53GE2;Q53GC7;A4D0V4;P47755;F8W9N7;C9JUG7;A0A0D9SET8;B4DE01	F-actin-capping protein subunit alpha-2	CAPZA2
29.188	28.9125	29.353	29.0902	28.7237	28.6588	29.1456	29.1535	28.9388	2	38.8	7.3713	4631000000	20	F2Z2Y6;C9JNV3;A4D0W0;O95777;C9JIZ0	F2Z2Y6;C9JNV3;A4D0W0;O95777;C9JIZ0	U6 snRNA-associated Sm-like protein LSm8	LSM8
NaN	NaN	NaN	25.0637	NaN	NaN	24.7471	NaN	NaN	3	9.9	52.684	139160000	8	A4D0Y1;A8K180;O00401	A4D0Y1;A8K180;O00401	Neural Wiskott-Aldrich syndrome protein	WASL
28.8498	29.0989	28.8751	28.8442	29.2372	29.0724	29.2562	29.0678	29.3312	4	68.9	20.529	4759400000	28	A4D0Z3;P84085;B4DLJ3;C9J1Z8	A4D0Z3;P84085;B4DLJ3;C9J1Z8	ADP-ribosylation factor 5	ARF5
26.3783	26.2817	26.3757	26.2913	26.432	26.1272	25.884	26.0448	25.771	10	16.9	87.75	641770000	29	B2RDB1;A4D0Z4;Q96CN9;B3KS56	B2RDB1;A4D0Z4;Q96CN9;B3KS56	GRIP and coiled-coil domain-containing protein 1	GCC1
31.1066	31.3111	31.183	31.0637	30.8249	30.8248	31.0663	31.0388	30.9649	8	71.1	13.569	18667000000	43	A4D105;P35244;B5MC59	A4D105;P35244;B5MC59	Replication protein A 14 kDa subunit	RPA3
32.8663	32.8304	32.7339	32.7971	32.9107	33.0158	33.109	33.1795	33.1344	10	47.5	20.811	70124000000	105	A4D177;Q13185;C9JMM0;B8ZZ43;S4R2Y4	A4D177;Q13185;C9JMM0;B8ZZ43;S4R2Y4	Chromobox protein homolog 3	CBX3
25.6155	NaN	25.5656	25.9734	25.5149	25.5157	25.2126	25.6625	25.393	2	27.9	32.604	404430000	4	A4D198	A4D198		LOC392647
27.804	27.8023	27.7366	27.7902	27.9951	27.9909	27.6005	27.7362	27.6466	6	17.8	42.932	1937400000	51	A4D1E9;C9J8R7;C9JNI1;C9JEQ8	A4D1E9;C9J8R7;C9JNI1	GTP-binding protein 10	GTPBP10
29.3929	29.4562	29.7276	29.561	29.6537	29.4712	29.4143	29.7503	29.6592	4	52.9	13.37	6633800000	45	A4D1K0;Q16864	A4D1K0;Q16864	V-type proton ATPase subunit F	ATP6V1F
NaN	NaN	NaN	NaN	NaN	NaN	25.1809	NaN	NaN	2	16.6	24.088	253170000	2	B7Z7P3;A8K2A0;A4D1K4;Q9ULQ0	B7Z7P3;A8K2A0;A4D1K4;Q9ULQ0	Striatin-interacting protein 2	FAM40B;STRIP2
28.4193	27.8538	28.0621	28.1814	27.8876	28.0951	28.1763	27.6499	28.0131	4	75.8	7.0801	2335100000	22	H7C4M9;C9JZY6;A4D1L5;P62256;C9JZG9;C9J8Q9	H7C4M9;C9JZY6;A4D1L5;P62256;C9JZG9	Ubiquitin-conjugating enzyme E2 H	UBE2H
30.2976	30.3735	30.2318	30.1832	30.2902	30.362	30.2229	30.2434	30.3712	12	41.9	26.152	10890000000	107	A4D1N4;C9JRZ6;Q9NX63;F8WAR4;B7Z1X9;F8WD73	A4D1N4;C9JRZ6;Q9NX63;F8WAR4;B7Z1X9	MICOS complex subunit MIC19	CHCHD3
26.7329	26.8621	26.824	26.7371	26.8761	26.8579	26.4528	26.6193	26.7577	7	12.1	79.239	940290000	20	C9J1X0;A4D1P6;A0A024R751	C9J1X0;A4D1P6;A0A024R751	WD repeat-containing protein 91	WDR91;HSPC049
27.0774	26.6796	26.8843	26.8077	26.7567	26.877	26.3233	26.8641	26.7935	6	16	79.063	979640000	17	A4D1T0;Q9H0J9;G5E9U9;H7C4L8	A4D1T0;Q9H0J9;G5E9U9	Poly [ADP-ribose] polymerase 12	ZC3HDC1;PARP12
NaN	25.2774	24.713	NaN	NaN	NaN	NaN	NaN	NaN	2	24.5	12.629	232700000	3	A4D1T3;Q3KRB4;Q9Y291;C9JBY7	A4D1T3;Q3KRB4;Q9Y291;C9JBY7	28S ribosomal protein S33, mitochondrial	MRPS33
32.6228	32.7855	32.8504	32.9075	32.8188	33.0464	32.6953	32.6464	32.8372	12	70.3	17.359	62952000000	149	Q567R6;A4D1U3;Q04837;A0A0G2JLD8;E7EUY5;B7Z268;C9K0U8	Q567R6;A4D1U3;Q04837;A0A0G2JLD8;E7EUY5;B7Z268;C9K0U8	Single-stranded DNA-binding protein;Single-stranded DNA-binding protein, mitochondrial	SSBP1
30.5114	30.4125	30.5938	30.6041	30.3552	30.6483	30.6193	30.4339	30.5237	14	50.8	43.796	12996000000	84	E9PC15;B4E2Z8;A4D1U5;Q53H12;E9PG39;B4DR72;A0A0G2JLG5;A0A0G2JLD0	E9PC15;B4E2Z8;A4D1U5;Q53H12;E9PG39;B4DR72;A0A0G2JLG5	Acylglycerol kinase, mitochondrial	AGK;FLJ10842
NaN	26.4799	NaN	26.1724	NaN	25.9266	26.0851	NaN	25.9767	2	12.2	21.405	511160000	8	A4D1V4;Q9BYC8	A4D1V4;Q9BYC8	39S ribosomal protein L32, mitochondrial	MRPL32
NaN	24.6536	24.4959	24.8366	24.8314	24.6801	24.2393	24.3138	24.5404	6	7.8	164.67	188510000	13	A4D1Z4;O43299;A0A024R817;U3KQ26	A4D1Z4;O43299;A0A024R817	AP-5 complex subunit zeta-1	KIAA0415;AP5Z1
30.4551	30.7794	30.9084	30.8469	30.8176	31.1478	30.8277	30.8505	30.9775	17	32.4	91.72	16210000000	88	A4D218;Q9Y6D9;C9JPS1;C9JP81;C9JTA2;C9JX80;C9JKI7;C9K086;C9J9H5;C9JJ38	A4D218;Q9Y6D9	Mitotic spindle assembly checkpoint protein MAD1	MAD1L1
29.542	29.9482	29.6969	29.8946	29.537	29.7726	29.2796	29.7658	29.6451	2	36.3	40.949	7213900000	19	A4D275;O15143;C9JBJ7;C9K057;C9J4Z7;F8VXW2;C9JEY1;C9JQM8;C9JFG9;C9J6C8;C9JTT6;C9JM51;F8WEB3	A4D275;O15143;C9JBJ7;C9K057;C9J4Z7;F8VXW2;C9JEY1;C9JQM8;C9JFG9;C9J6C8	Actin-related protein 2/3 complex subunit 1B	ARPC1B
NaN	26.0411	NaN	NaN	NaN	NaN	NaN	NaN	NaN	2	9.6	31.691	167520000	3	A4D2F2;O60921	A4D2F2;O60921	Checkpoint protein HUS1	HUS1
30.234	30.2462	30.6337	30.3663	30.6284	30.6968	30.8415	30.9221	30.4189	7	43.5	21.606	13370000000	38	Q9UES0;B5BU81;A4D2J0;O15498	Q9UES0;B5BU81;A4D2J0;O15498	Synaptobrevin homolog YKT6	YKT6
NaN	NaN	24.7181	24.7957	24.8106	24.6887	NaN	24.9737	NaN	4	6	114.44	190000000	8	C9JPC9;B4DWG7;A4D2N7;A4D2N6;Q9H9J4;E7EWZ4	C9JPC9;B4DWG7;A4D2N7;A4D2N6;Q9H9J4;E7EWZ4	Ubiquitin carboxyl-terminal hydrolase;Ubiquitin carboxyl-terminal hydrolase 42	USP42
25.0471	25.0997	25.2334	25.293	NaN	25.2143	25.2579	25.413	25.3801	3	23.5	30.839	308600000	19	A4D7U7;A4D7V5;A4D7U3;B8ZZU6;E9PBF9;A4D7U9;B3KY57;P15336;F5H629;C9JCI8;E9PEK8;H7C2N6	A4D7U7;A4D7V5;A4D7U3;B8ZZU6;E9PBF9;A4D7U9;B3KY57;P15336;F5H629	Cyclic AMP-dependent transcription factor ATF-2	ATF2
28.1351	26.4856	27.4321	26.5256	26.5235	26.0199	25.8996	NaN	25.6469	2	6.6	44.838	920300000	11	Q32Q26;J3KPY9;A4FUA5;P58335;A0A0C4DG84	Q32Q26;J3KPY9;A4FUA5;P58335;A0A0C4DG84	Anthrax toxin receptor 2	ANTXR2
31.1361	31.3784	31.318	31.2733	31.2764	31.4225	31.299	31.3339	31.4198	11	46.7	43.826	26142000000	127	Q59EY4;B4DUD6;Q8TC62;E7ES33;A4GYY8;E7EPK1;Q16181;B4DNE4;A0A024RA87;G3V1Q4;A0A023T695;Q3LIE9;A8K3D0;B4DPQ6;Q3B7A3;A0A0U1RRE1;A0A0U1RRH9;A0A0U1RRM2;A0A0U1RQK0;A0A0U1RRD1;Q5JXL7;A4D1Y2;Q6ZU15	Q59EY4;B4DUD6;Q8TC62;E7ES33;A4GYY8;E7EPK1;Q16181;B4DNE4;A0A024RA87;G3V1Q4;A0A023T695;Q3LIE9;A8K3D0;B4DPQ6;Q3B7A3	Septin-7	SEPT7;DKFZp686F17268;Nbla02942
29.0302	29.0466	29.2219	29.1449	28.987	29.034	29.1189	28.8886	29.0045	8	37.4	43.439	4667000000	59	A4QPA9;Q02750;B4DFY5;H3BRW9	A4QPA9;Q02750;B4DFY5	Dual specificity mitogen-activated protein kinase kinase 1	MAP2K1
25.4175	26.2529	25.5007	26.041	27.0281	26.1272	25.4041	25.7076	25.525	4	45.8	16.45	553280000	23	B4E3N8;A4UAE9;Q53FP9;A8K6A0;Q15011;H3BP08;B4DXX2;A8K7S3;H3BTA8;H3BTT7;H3BRS4	B4E3N8;A4UAE9;Q53FP9;A8K6A0;Q15011;H3BP08;B4DXX2;A8K7S3;H3BTA8;H3BTT7	Homocysteine-responsive endoplasmic reticulum-resident ubiquitin-like domain member 1 protein	HERPUD1
NaN	NaN	NaN	NaN	NaN	NaN	NaN	NaN	25.1564	2	5.3	70.861	229830000	6	Q1XBU8;A4ZVS8;A4ZVS7;O75925;B4DGW0;Q2TA77;A0A087WUY7;A0A024RC49;O75928	Q1XBU8;A4ZVS8;A4ZVS7;O75925;B4DGW0;Q2TA77;A0A087WUY7;A0A024RC49;O75928	E3 SUMO-protein ligase PIAS1;E3 SUMO-protein ligase PIAS2	PIAS1;PIAS2
NaN	NaN	NaN	25.8441	26.0375	26.1252	NaN	NaN	NaN	2	11.5	17.143	410280000	5	F5H4Q5;B4DYD9;A5D8V6	F5H4Q5;B4DYD9;A5D8V6	Vacuolar protein sorting-associated protein 37C	VPS37C
27.0603	26.7846	27.1907	27.3908	27.1786	27.3776	27.2493	27.5496	27.0294	6	30.6	28.207	1310300000	25	H0YMJ0;H0YLJ3;A5D8W6;B3KTM8;Q9UBU8;H0YM21;Q0VAE4;H0YMT8;H0YNE0;H0YLV1;H0YNX3	H0YMJ0;H0YLJ3;A5D8W6;B3KTM8;Q9UBU8;H0YM21;Q0VAE4;H0YMT8;H0YNE0	Mortality factor 4-like protein 1	MORF4L1
25.0632	NaN	25.7631	25.6523	25.9137	24.7738	NaN	25.3642	24.7657	4	5.2	131.04	313520000	11	A5PKX5;Q16706;Q49A69	A5PKX5;Q16706	Alpha-mannosidase;Alpha-mannosidase 2	MAN2A1
28.7077	28.439	28.5741	28.4455	28.5986	28.6617	28.5494	28.5998	28.4603	12	16.2	158.97	3343600000	43	A5PL36;E7ESU0;A0A024R2T9;E7EST9;O94966;B5MEG5;A0A0A0MR08;B4DK86	A5PL36;E7ESU0;A0A024R2T9;E7EST9;O94966;B5MEG5	Ubiquitin carboxyl-terminal hydrolase;Ubiquitin carboxyl-terminal hydrolase 19	USP19
28.1447	28.2102	28.4128	27.929	27.8684	28.109	28.1511	28.1152	28.1079	3	9.7	43.561	2449600000	14	B4DXG8;D6RIY6;A5PLM5;Q06265;H0Y9L5;D6R905	B4DXG8;D6RIY6;A5PLM5;Q06265;H0Y9L5;D6R905	Exosome complex component RRP45	EXOSC9
30.4426	30.5661	30.6094	30.6381	30.6444	30.6592	30.6617	30.6487	30.5489	44	23.9	266.94	13698000000	200	A5YKK6;B4DYL7;B3KPW6;H3BVC9;B3KS60;B7Z6X2;H3BMH0;H3BNB1;H3BR89;B4DTM8;H3BTH2;H3BPF1;H3BT18;H3BU44	A5YKK6;B4DYL7	CCR4-NOT transcription complex subunit 1	CNOT1
24.8522	24.9476	24.9028	25.0535	25.1713	25.0452	NaN	25.1798	25.0091	2	3.4	132.46	281470000	5	C9JLV4;A5YM44;A7E2A2;O14727	C9JLV4;A5YM44;A7E2A2;O14727	Apoptotic protease-activating factor 1	APAF1
NaN	26.0981	26.1537	26.1045	25.9956	25.9409	25.6119	26.0839	25.6548	6	5.9	116.04	540030000	11	L7RXH0;A5YM53;P06756;H7BZG1;B4DYQ7	L7RXH0;A5YM53;P06756	Integrin alpha-V;Integrin alpha-V heavy chain;Integrin alpha-V light chain	ITGAV
NaN	NaN	NaN	NaN	25.9304	NaN	NaN	NaN	NaN	4	6.1	81.851	184340000	3	E7EW84;A5YP36;B4DEZ1;Q8TAG9;B2RDH5;B3KXY5;B7Z6G5;B1AP46;Q9NTA6;J3QT38;A0A0U1RRB6;Q9Y2D4	E7EW84;A5YP36;B4DEZ1;Q8TAG9;B2RDH5;B3KXY5;B7Z6G5	Exocyst complex component 6	EXOC6;SEC15L3
27.8656	27.9265	28.1333	27.9	27.4394	27.7686	27.8098	27.5807	27.9014	16	31	84.973	1988200000	39	A6H8Y5;O60934;A8K1D3;A0A0C4DG07;A0PJ71;V9PAJ5;A0A087X1V5;E5RGU1;E2QRP0;V9PAP6;V9PBC6;E5RGR7	A6H8Y5;O60934;A8K1D3;A0A0C4DG07;A0PJ71	Nibrin	NBN
25.7947	26.1854	26.2603	26.5619	26.5973	26.4635	26.462	26.6716	26.7231	8	7.3	162.73	756960000	20	A6N6J7;P41229;B4E1Y0;Q9BY66;C9JGA3;E9PFH2	A6N6J7;P41229	Lysine-specific demethylase 5C	JARID1C;KDM5C
29.8435	29.8763	30.1882	30.4198	30.2682	30.1973	30.0928	30.2275	29.9127	3	41.3	9.0115	9768900000	31	H3BTL1;H6UMI0;Q658J6;Q9GZQ8;A6NCE7;H3BTE7;Q9H492	H3BTL1;H6UMI0;Q658J6;Q9GZQ8;A6NCE7	Microtubule-associated proteins 1A/1B light chain 3B;Microtubule-associated proteins 1A/1B light chain 3 beta 2	MAP1LC3B;DKFZp762B153;MAP1LC3B2
30.0285	29.4755	29.8447	29.9146	29.4898	29.7032	29.9406	29.8979	29.92	8	38	34.006	7961300000	52	A6NDG6;H3BV17	A6NDG6	Phosphoglycolate phosphatase	PGP
29.2689	29.357	29.4704	29.7372	29.5115	29.5927	29.6594	29.4501	29.5312	5	24.5	33.62	6452800000	37	A6NDU8;A0A0C4DGW6	A6NDU8;A0A0C4DGW6	UPF0600 protein C5orf51	C5orf51
30.3299	30.478	30.6073	30.8562	30.6527	31.2556	30.941	30.9136	30.8469	2	37.8	9.5355	15522000000	25	A6NL93;Q6NSG7;Q3B790;A6NEL0;P05114;A0A024R2A3	A6NL93;Q6NSG7;Q3B790;A6NEL0;P05114;A0A024R2A3	Non-histone chromosomal protein HMG-14	HMGN1;hCG_1979072
31.2776	31.3681	31.3484	31.3354	31.4082	31.4824	31.4954	31.4665	31.491	34	23.2	213.47	23882000000	193	A6NEM2;Q05C05	A6NEM2		HCFC1
21.297	NaN	NaN	22.3006	NaN	NaN	NaN	NaN	NaN	2	1.3	108.44	39926000	3	A6NFI3	A6NFI3	Zinc finger protein 316	ZNF316
26.5896	26.113	26.185	26.2602	26.1187	26.1087	25.973	25.8275	26.0603	3	5.4	100.9	627140000	5	A6NFQ2;Q8N1I1;H0YC74;A0A1B0GVM2	A6NFQ2;Q8N1I1;H0YC74	TRPM8 channel-associated factor 2	TCAF2
31.8251	31.1753	31.9822	31.4263	30.9788	31.4114	31.7346	31.6338	31.7153	11	43.1	25.895	26965000000	98	A6NFX8;Q9UKK9;A6NJU6;A6NCQ0;H0YEY4;C9JYY9	A6NFX8;Q9UKK9;A6NJU6	ADP-sugar pyrophosphatase	NUDT5
[truncated: 3,576 more rows]

## Sheet: ttest_total_proteome
LFQ intensity (log2)									Global data					T-test probe/DMSO (24 hr)				Protein information
[truncated: 4,248 more rows]

## Sheet: GO analysis upregulated
GO-ID	p-value	corr p-value	x	n	X	N	Description	Genes in test set
[truncated: 129 more rows]
